# Supplementary material for: T cell stiffness is enhanced upon formation of immunological synapse
Source: eLife. 2021 Jul 27;10:e66643. doi: 10.7554/eLife.66643 (PMC8360652; doi:10.7554/eLife.66643)
Supplement: Figure 2—figure supplement 1—source data 1. [file elife-66643-fig2-figsupp1-data1.xlsx]

## Sheet: source data figure 2-fig. sup.1
	Young`s modulus	spot 1	spot 2	spot 3	spot 4	spot 5
Cell line/condition		[kPa]	[kPa]	[kPa]	[kPa]	[kPa]
primary T-cell αLFA-1+αCD3+CD28		240.211	235.045	286.556	247.134	255.507
primary T-cell αLFA-1		151.513	163.602	231.386	203.652	131.011
primary T-cell αLFA-1+αCD3+CD28 DMSO		280.359	220.732	292.33	290.156	200.666
primary T-cell αLFA-1+αCD3+CD28 EGTA		174.3	145.656	156.289	180.905	145.909

## Sheet: raw data_prim T cell full AB
		prim Tcell cell2-1 full AB lamellipodium spot_1					prim T cell cell2-1 full AB lamellipodium spot_2					prim T cell cell2-1 full AB lamellipodium spot_3					prim T cell cell2-1 full AB lamellipodium spot_4					prim T cell cell2-1 full AB lamellipodium spot_5
		Average	240.211				Average	235.045				Average	286.556				Average	247.134				Average	255.507
		StDev	92.8896				StDev	82.791				StDev	235.442				StDev	150.874				StDev	119.244
				setp					setp					setp					setp					setp
		kPa	%				kPa	%				kPa	%				kPa	%				kPa	%
	0	0	1.5625	901.583		0	0	1.5873	876.925		0	0	4	3284.56		0	0	8	4886.01		0	0	5	3264.18
	0	1.04135	0	0		0	0.749044	0	0		0	1.92268	0	0		0	0.694236	0	0		0	0.785583	0	0
	0	2.08271	0	0		0	1.49809	0	0		0	3.84535	0	0		0	1.38847	0	0		0	1.57116	0	0
	0	3.12406	0	0		0	2.24713	0	0		0	5.76803	0	0		0	2.08271	0	0		0	2.35675	0	0
	0	4.16542	0	0		0	2.99618	0	0		0	7.6907	0	0		0	2.77694	0	0		0	3.14233	0	0
	0	5.20677	0	0		0	3.74522	0	0		0	9.61338	0	0		0	3.47118	0	0		0	3.92791	0	0
	0	6.24812	0	0		0	4.49426	0	0		0	11.536	0	0		0	4.16542	0	0		0	4.7135	0	0
	0	7.28948	0	0		0	5.24331	0	0		0	13.4587	0	0		0	4.85965	0	0		0	5.49908	0	0
	0	8.33083	0	0		0	5.99235	0	0		0	15.3814	0	0		0	5.55389	0	0		0	6.28466	0	0
	0	9.37218	0	0		0	6.7414	0	0		0	17.3041	0	0		0	6.24812	0	0		0	7.07024	0	0
	0	10.4135	0	0		0	7.49044	0	0		0	19.2268	0	0		0	6.94236	0	0		0	7.85583	0	0
	0	11.4549	0	0		0	8.23948	0	0		0	21.1494	0	0		0	7.63659	0	0		0	8.64141	0	0
	0	12.4962	0	0		0	8.98853	0	0		0	23.0721	0	0		0	8.33083	0	0		0.47135	9.42699	5	3027.76
	0	13.5376	0	0		0	9.73757	0	0		0	24.9948	0	0		0.361003	9.02507	4	2267.83		0	10.2126	0	0
	0	14.579	0	0		0	10.4866	0	0		0	26.9175	0	0		0	9.7193	0	0		0	10.9982	0	0
	0	15.6203	0	0		0	11.2357	0	0		0	28.8401	0	0		0	10.4135	0	0		0	11.7837	0	0
	0	16.6617	0	0		0	11.9847	0	0		0	30.7628	0	0		0	11.1078	0	0		0	12.5693	0	0
	0	17.703	0	0		0	12.7338	0	0		0	32.6855	0	0		0	11.802	0	0		0	13.3549	0	0
	0	18.7444	0	0		0	13.4828	0	0		0	34.6082	0	0		0	12.4962	0	0		0	14.1405	0	0
	0	19.7857	0	0		0	14.2318	0	0		0	36.5308	0	0		0	13.1905	0	0		0	14.9261	0	0
	0	20.8271	0	0		0	14.9809	0	0		0	38.4535	0	0		0	13.8847	0	0		0	15.7117	0	0
	0	21.8684	0	0		0	15.7299	0	0		0	40.3762	0	0		0	14.579	0	0		0	16.4972	0	0
	0	22.9098	0	0		0	16.479	0	0		0	42.2989	0	0		0	15.2732	0	0		0	17.2828	0	0
	0	23.9511	0	0		0	17.228	0	0		0	44.2215	0	0		0	15.9674	0	0		0	18.0684	0	0
	0	24.9925	0	0		0	17.977	0	0		0	46.1442	0	0		0	16.6617	0	0		0	18.854	0	0
	0	26.0339	0	0		0	18.7261	0	0		0	48.0669	0	0		0	17.3559	0	0		0	19.6396	0	0
	0	27.0752	0	0		0	19.4751	0	0		0	49.9896	0	0		0	18.0501	0	0		0	20.4251	0	0
	0	28.1166	0	0		0	20.2242	0	0		0	51.9122	0	0		0.749775	18.7444	4	2086.47		0	21.2107	0	0
	0	29.1579	0	0		0	20.9732	0	0		2.1534	53.8349	4	2166.36		0	19.4386	0	0		0	21.9963	0	0
	0	30.1993	0	0		0	21.7223	0	0		0	55.7576	0	0		0	20.1328	0	0		0	22.7819	0	0
	0	31.2406	0	0		0	22.4713	0	0		0	57.6803	0	0		0	20.8271	0	0		0	23.5675	0	0
	0	32.282	0	0		0	23.2204	0	0		0	59.6029	0	0		0	21.5213	0	0		0	24.3531	0	0
	0	33.3233	0	0		0	23.9694	0	0		0	61.5256	0	0		0	22.2156	0	0		0	25.1386	0	0
	0	34.3647	0	0		0	24.7185	0	0		0	63.4483	0	0		0	22.9098	0	0		0	25.9242	0	0
	0	35.406	0	0		0	25.4675	0	0		0	65.371	0	0		0	23.604	0	0		0	26.7098	0	0
	0	36.4474	0	0		0	26.2165	0	0		0	67.2936	0	0		0	24.2983	0	0		0	27.4954	0	0
	0	37.4887	0	0		0	26.9656	0	0		2.76865	69.2163	4	1889.45		0	24.9925	0	0		1.41405	28.281	5	2581.58
	0	38.5301	0	0		0	27.7146	0	0		0	71.139	0	0		0	25.6867	0	0		0	29.0666	0	0
	0	39.5714	0	0		0	28.4637	0	0		0	73.0617	0	0		0	26.381	0	0		0	29.8521	0	0
	0	40.6128	0	0		0	29.2127	0	0		0	74.9843	0	0		0	27.0752	0	0		0	30.6377	0	0
	0	41.6542	0	0		0	29.9618	0	0		0	76.907	0	0		1.11078	27.7694	4	1924.83		0	31.4233	0	0
	0	42.6955	0	0		0	30.7108	0	0		3.15319	78.8297	4	1726		0	28.4637	0	0		0	32.2089	0	0
	0	43.7369	0	0		0	31.4598	0	0		0	80.7524	0	0		0	29.1579	0	0		0	32.9945	0	0
	0	44.7782	0	0		0	32.2089	0	0		0	82.675	0	0		0	29.8521	0	0		0	33.7801	0	0
	0	45.8196	0	0		0	32.9579	0	0		3.38391	84.5977	4	1631.48		0	30.5464	0	0		0	34.5656	0	0
	0.732202	46.8609	1.5625	584.129		0	33.707	0	0		0	86.5204	0	0		0	31.2406	0	0		0	35.3512	0	0
	0	47.9023	0	0		0	34.456	0	0		0	88.4431	0	0		0	31.9349	0	0		0	36.1368	0	0
	0	48.9436	0	0		0	35.2051	0	0		3.61463	90.3658	4	1539.62		0	32.6291	0	0		0	163.493	0	0
	0	49.985	0	0		0	35.9541	0	0		0	92.2884	0	0		0	33.3233	0	0		0	164.534	0	0
	0	51.0263	0	0		0	36.7032	0	0		0	94.2111	0	0		0	34.0176	0	0		0	165.575	0	0
	0	52.0677	0	0		0.59448	37.4522	1.5873	619.731		0	96.1338	0	0		0	34.7118	0	0		0	166.617	0	0
	0	53.1091	0	0		0	38.2012	0	0		0	98.0564	0	0		0	35.406	0	0		7.85897	167.658	4.6875	361.753
	0	54.1504	0	0		0	38.9503	0	0		0	99.9791	0	0		0	36.1003	0	0		0	168.699	0	0
	0	55.1917	0	0		0	39.6993	0	0		0	101.902	0	0		0	36.7945	0	0		0	169.741	0	0
	0	56.2331	0	0		0	40.4484	0	0		0	103.825	0	0		0	37.4887	0	0		0	170.782	0	0
	0	57.2745	0	0		0	41.1974	0	0		0	105.747	0	0		0	38.183	0	0		0	171.823	0	0
	0	58.3158	0	0		0	41.9465	0	0		0	107.67	0	0		0	38.8772	0	0		0	172.865	0	0
	0	59.3572	0	0		0	42.6955	0	0		0	109.593	0	0		0	39.5714	0	0		0	173.906	0	0
	0	60.3985	0	0		0	43.4445	0	0		0	111.515	0	0		0	40.2657	0	0		0	174.947	0	0
	0	61.4399	0	0		0	44.1936	0	0		0	113.438	0	0		0	40.9599	0	0		0	175.989	0	0
	0	62.4812	0	0		0	44.9426	0	0		0	115.361	0	0		0	41.6542	0	0		0	177.03	0	0
	0	63.5226	0	0		0	45.6917	0	0		0	117.283	0	0		0	42.3484	0	0		0	178.071	0	0
	0	64.5639	0	0		0	46.4407	0	0		0	119.206	0	0		0	43.0426	0	0		0	179.113	0	0
	1.02508	65.6053	1.5625	476.362		0	47.1898	0	0		0	121.129	0	0		0	43.7369	0	0		0	180.154	0	0
	0	66.6466	0	0		0	47.9388	0	0		0	123.051	0	0		0	44.4311	0	0		0	181.196	0	0
	0	67.688	0	0		0	48.6879	0	0		0	124.974	0	0		0	45.1253	0	0		0	182.237	0	0
	0	68.7293	0	0		0	49.4369	0	0		0	126.897	0	0		0	45.8196	0	0		0	183.278	0	0
	0	69.7707	0	0		0	50.1859	0	0		0	128.819	0	0		3.7211	46.5138	8	3219.87		0	184.32	0	0
	0	70.812	0	0		0	50.935	0	0		0	130.742	0	0		0	47.208	0	0		0	185.361	0	0
	0	71.8534	0	0		0	51.684	0	0		0	132.665	0	0		0	47.9023	0	0		8.73761	186.402	4.6875	223.848
	0	72.8948	0	0		0	52.4331	0	0		0	134.587	0	0		0	48.5965	0	0		0	187.444	0	0
	0	73.9361	0	0		0	53.1821	0	0		0	136.51	0	0		0	49.2908	0	0		0	188.485	0	0
	0	74.9775	0	0		0	53.9312	0	0		5.5373	138.433	4	877.617		0	49.985	0	0		0	189.526	0	0
	0	76.0188	0	0		0	54.6802	0	0		0	140.355	0	0		0	50.6792	0	0		0	190.568	0	0
	0	77.0602	0	0		0	55.4293	0	0		0	142.278	0	0		0	51.3735	0	0		0	191.609	0	0
	0	78.1015	0	0		0.891719	56.1783	1.5873	507.832		0	144.201	0	0		0	52.0677	0	0		0	192.65	0	0
	0	79.1429	0	0		0	56.9273	0	0		0	146.123	0	0		0	52.7619	0	0		0	193.692	0	0
	0	80.1842	0	0		0	57.6764	0	0		0	148.046	0	0		0	53.4562	0	0		0	194.733	0	0
	0	81.2256	0	0		0	58.4254	0	0		0	149.969	0	0		0	54.1504	0	0		12.2359	195.774	6.25	222.996
	0	82.2669	0	0		0	59.1745	0	0		0	151.891	0	0		0	54.8446	0	0		0	196.816	0	0
	0	83.3083	0	0		0	59.9235	0	0		6.15256	153.814	4	704.813		0	55.5389	0	0		0	197.857	0	0
	0	84.3497	0	0		0	60.6726	0	0		0	155.737	0	0		0	56.2331	0	0		0	198.899	0	0
	0	85.391	0	0		0	61.4216	0	0		0	157.659	0	0		0	56.9273	0	0		0	199.94	0	0
	0	86.4324	0	0		0	62.1707	0	0		0	159.582	0	0		0	57.6216	0	0		0	200.981	0	0
	0	87.4737	0	0		0	62.9197	0	0		0	161.505	0	0		0	58.3158	0	0		0	202.023	0	0
	0	88.5151	0	0		0	63.6687	0	0		0	163.427	0	0		0	59.01	0	0		0	203.064	0	0
	0	89.5564	0	0		0	64.4178	0	0		0	165.35	0	0		0	59.7043	0	0		0	204.105	0	0
	0	90.5978	0	0		0	65.1668	0	0		0	167.273	0	0		0	60.3985	0	0		12.8217	205.147	6.25	158.508
	0	91.6391	0	0		0	65.9159	0	0		0	169.196	0	0		0	61.0928	0	0		0	206.188	0	0
	0	92.6805	0	0		0	66.6649	0	0		0	171.118	0	0		0	61.787	0	0		0	207.229	0	0
	1.4644	93.7218	1.5625	335.298		0	67.4139	0	0		0	173.041	0	0		0	62.4812	0	0		0	208.271	0	0
	0	94.7632	0	0		0	68.163	0	0		0	174.964	0	0		0	63.1755	0	0		0	209.312	0	0
	0	95.8046	0	0		0	68.912	0	0		0	176.886	0	0		0	63.8697	0	0		0	210.353	0	0
	0	96.8459	0	0		0	69.6611	0	0		0	178.809	0	0		0	64.5639	0	0		0	211.395	0	0
	0	97.8872	0	0		0	70.4101	0	0		0	180.732	0	0		2.61033	65.2582	4	1323.15		0	212.436	0	0
	0	98.9286	0	0		0	71.1592	0	0		0	182.654	0	0		0	65.9524	0	0		0	213.477	0	0
	0	99.97	0	0		0	71.9082	0	0		0	184.577	0	0		0	66.6466	0	0		3.35186	214.519	1.5625	26.25
	0	101.011	0	0		0	72.6573	0	0		7.45998	186.5	4	400.449		0	67.3409	0	0		0	215.56	0	0
	0	102.053	0	0		0	73.4063	0	0		0	188.422	0	0		0	68.0351	0	0		0	216.602	0	0
	1.61084	103.094	1.5625	293.767		0	74.1553	0	0		22.8414	190.345	12	1110.78		0	68.7293	0	0		0	217.643	0	0
	0	104.135	0	0		0	74.9044	0	0		0	192.268	0	0		0	69.4236	0	0		0	218.684	0	0
	0	105.177	0	0		0	75.6535	0	0		0	194.19	0	0		0	70.1178	0	0		0	219.726	0	0
	0	106.218	0	0		0	76.4025	0	0		0	196.113	0	0		0	70.8121	0	0		0	220.767	0	0
	0	107.259	0	0		0	77.1515	0	0		0	198.036	0	0		0	71.5063	0	0		0	221.808	0	0
	0	108.301	0	0		0	77.9006	0	0		0	199.958	0	0		0	72.2005	0	0		0	222.85	0	0
	0	109.342	0	0		0	78.6496	0	0		0	201.881	0	0		0	72.8948	0	0		6.9966	223.891	3.125	31.2359
	0	110.383	0	0		0	79.3987	0	0		0	203.804	0	0		0	73.589	0	0		0	224.932	0	0
	0	111.425	0	0		0	80.1477	0	0		0	205.726	0	0		0	74.2832	0	0		0	225.974	0	0
	1.75728	112.466	1.5625	254.98		0	80.8967	0	0		0	207.649	0	0		0	74.9775	0	0		0	227.015	0	0
	0	113.508	0	0		0	81.6458	0	0		0	209.572	0	0		0	75.6717	0	0		0	228.056	0	0
	0	114.549	0	0		0	82.3948	0	0		8.45977	211.494	4	225.368		0	76.3659	0	0		0	229.098	0	0
	0	115.59	0	0		0	83.1439	0	0		0	213.417	0	0		0	77.0602	0	0		0	230.139	0	0
	0	116.632	0	0		1.33163	83.8929	1.5873	362.651		0	215.34	0	0		0	77.7544	0	0		0	231.18	0	0
	0	117.673	0	0		0	84.642	0	0		0	217.262	0	0		0	78.4487	0	0		0	232.222	0	0
	0	118.714	0	0		0	85.391	0	0		0	219.185	0	0		0	79.1429	0	0		0	233.263	0	0
	0	119.756	0	0		0	86.1401	0	0		0	221.108	0	0		0	79.8371	0	0		0	234.305	0	0
	0	120.797	0	0		0	86.8891	0	0		0	223.03	0	0		0	80.5314	0	0		0	235.346	0	0
	1.90373	121.838	1.5625	218.939		0	87.6381	0	0		0	224.953	0	0		0	81.2256	0	0		0	236.387	0	0
	0	122.88	0	0		0	88.3872	0	0		0	226.876	0	0		0	81.9198	0	0		0	237.429	0	0
	0	123.921	0	0		0	89.1362	0	0		0	228.798	0	0		0	82.6141	0	0		0	238.47	0	0
	0	124.963	0	0		0	89.8853	0	0		0	230.721	0	0		0	83.3083	0	0		0	239.511	0	0
	0	126.004	0	0		0	90.6343	0	0		0	232.644	0	0		6.7202	84.0025	8	2128.95		0	240.553	0	0
	0	127.045	0	0		0	91.3834	0	0		0	234.566	0	0		0	84.6968	0	0		0	241.594	0	0
	0	128.087	0	0		0	92.1324	0	0		0	236.489	0	0		0	85.391	0	0		3.79118	242.635	1.5625	2.58861
	0	129.128	0	0		0	92.8815	0	0		0	238.412	0	0		0	86.0853	0	0		0	243.677	0	0
	0	130.169	0	0		1.4862	93.6305	1.5873	317.431		0	240.334	0	0		0	86.7795	0	0		0	244.718	0	0
	0	131.211	0	0		0	94.3795	0	0		0	242.257	0	0		0	87.4737	0	0		0	245.76	0	0
	0	132.252	0	0		0	95.1286	0	0		0	244.18	0	0		0	88.168	0	0		0	246.801	0	0
	0	133.293	0	0		0	95.8776	0	0		0	246.102	0	0		0	88.8622	0	0		0	247.842	0	0
	0	134.335	0	0		0	96.6267	0	0		0	248.025	0	0		0	89.5564	0	0		0	248.884	0	0
	0	135.376	0	0		0	97.3757	0	0		0	249.948	0	0		0	90.2507	0	0		0	249.925	0	0
	0	136.417	0	0		0	98.1248	0	0		0	251.87	0	0		0	90.9449	0	0		0	250.966	0	0
	0	137.459	0	0		0	98.8738	0	0		0	253.793	0	0		0	91.6391	0	0		11.8129	252.008	4.6875	0.573929
	0	138.5	0	0		0	99.6228	0	0		0	255.716	0	0		0	92.3334	0	0		0	253.049	0	0
	2.18033	139.541	1.5625	158.35		0	100.372	0	0		0	257.639	0	0		3.7211	93.0276	4	949.949		0	254.09	0	0
	0	140.583	0	0		0	101.121	0	0		0	259.561	0	0		0	93.7218	0	0		0	255.132	0	0
	0	141.624	0	0		0	101.87	0	0		0	261.484	0	0		0	94.4161	0	0		0	256.173	0	0
	0	142.666	0	0		1.62887	102.619	1.5873	278.361		0	263.406	0	0		0	95.1103	0	0		0	257.214	0	0
	0	143.707	0	0		0	103.368	0	0		21.2263	265.329	8	36.0444		0	95.8046	0	0		0	258.256	0	0
	0	144.748	0	0		0	104.117	0	0		0	267.252	0	0		0	96.4988	0	0		0	259.297	0	0
	0	145.79	0	0		0	104.866	0	0		0	269.175	0	0		0	97.193	0	0		0	260.339	0	0
	0	146.831	0	0		0	105.615	0	0		0	271.097	0	0		0	97.8873	0	0		28.5884	261.38	10.9375	3.77268
	0	147.872	0	0		0	106.364	0	0		0	273.02	0	0		0	98.5815	0	0		0	262.421	0	0
	2.32678	148.914	1.5625	130.238		0	107.113	0	0		0	274.943	0	0		0	99.2757	0	0		0	263.462	0	0
	0	149.955	0	0		0	107.862	0	0		0	276.865	0	0		0	99.97	0	0		0	264.504	0	0
	0	150.996	0	0		0	108.611	0	0		0	278.788	0	0		0	100.664	0	0		0	265.545	0	0
	0	152.038	0	0		0	109.36	0	0		0	280.711	0	0		0	101.358	0	0		0	266.587	0	0
	0	153.079	0	0		0	110.109	0	0		0	282.633	0	0		0	102.053	0	0		0	267.628	0	0
	0	154.12	0	0		0	110.859	0	0		0	284.556	0	0		0	102.747	0	0		0	268.669	0	0
	0	155.162	0	0		0	111.608	0	0		11.4591	286.479	4	0.000236426		0	103.441	0	0		0	269.711	0	0
	0	156.203	0	0		0	112.357	0	0		0	288.401	0	0		0	104.135	0	0		25.383	270.752	9.375	21.7892
	0	157.244	0	0		0	113.106	0	0		0	290.324	0	0		0	104.83	0	0		0	271.793	0	0
	4.94643	158.286	3.125	209.742		0	113.855	0	0		11.6899	292.247	4	1.29555		0	105.524	0	0		0	272.835	0	0
	0	159.327	0	0		0	114.604	0	0		0	294.169	0	0		0	106.218	0	0		0	273.876	0	0
	0	160.369	0	0		0	115.353	0	0		0	296.092	0	0		0	106.912	0	0		0	274.917	0	0
	0	161.41	0	0		0	116.102	0	0		11.9206	298.015	4	5.25246		0	107.607	0	0		0	275.959	0	0
	0	162.451	0	0		0	116.851	0	0		0	299.937	0	0		0	108.301	0	0		0	277	0	0
	0	163.493	0	0		0	117.6	0	0		0	301.86	0	0		0	163.493	0	0		0	278.041	0	0
	0	164.534	0	0		0	118.349	0	0		0	303.783	0	0		0	164.534	0	0		0	279.083	0	0
	0	165.575	0	0		0	119.098	0	0		0	305.705	0	0		0	165.575	0	0		21.8847	280.124	7.8125	47.3453
	0	166.617	0	0		0	119.847	0	0		0	307.628	0	0		0	166.617	0	0		0	281.166	0	0
	7.85897	167.658	4.6875	246.747		0	120.596	0	0		0	309.551	0	0		7.85897	167.658	4.6875	296.082		0	282.207	0	0
	0	168.699	0	0		1.92611	121.345	1.5873	205.202		0	311.473	0	0		0	168.699	0	0		0	283.248	0	0
	0	169.741	0	0		0	122.094	0	0		0	313.396	0	0		0	169.741	0	0		0	284.29	0	0
	0	170.782	0	0		0	122.843	0	0		0	315.319	0	0		0	170.782	0	0		0	285.331	0	0
	0	171.823	0	0		0	123.592	0	0		0	317.241	0	0		0	171.823	0	0		0	286.372	0	0
	0	172.865	0	0		0	124.341	0	0		0	319.164	0	0		0	172.865	0	0		0	287.414	0	0
	0	173.906	0	0		0	125.09	0	0		0	321.087	0	0		0	173.906	0	0		0	288.455	0	0
	0	174.947	0	0		0	125.839	0	0		0	323.01	0	0		0	174.947	0	0		4.52338	289.496	1.5625	18.0514
	0	175.989	0	0		0	126.588	0	0		0	324.932	0	0		0	175.989	0	0		0	290.538	0	0
	0	177.03	0	0		0	127.338	0	0		0	326.855	0	0		0	177.03	0	0		0	291.579	0	0
	0	178.071	0	0		0	128.087	0	0		0	328.777	0	0		0	178.071	0	0		0	292.62	0	0
	0	179.113	0	0		0	128.836	0	0		0	330.7	0	0		0	179.113	0	0		0	293.662	0	0
	0	180.154	0	0		0	129.585	0	0		0	332.623	0	0		0	180.154	0	0		0	294.703	0	0
	0	181.196	0	0		2.06879	130.334	1.5873	174.04		0	334.546	0	0		0	181.196	0	0		0	295.745	0	0
	0	182.237	0	0		0	131.083	0	0		0	336.468	0	0		0	182.237	0	0		0	296.786	0	0
	0	183.278	0	0		0	131.832	0	0		0	338.391	0	0		0	183.278	0	0		0	297.827	0	0
	0	184.32	0	0		0	132.581	0	0		0	340.314	0	0		0	184.32	0	0		14.0095	298.868	4.6875	88.1364
	0	185.361	0	0		0	133.33	0	0		0	342.236	0	0		0	185.361	0	0		0	299.91	0	0
	8.73761	186.402	4.6875	135.721		0	134.079	0	0		0	344.159	0	0		8.73761	186.402	4.6875	172.89		0	300.951	0	0
	0	187.444	0	0		0	134.828	0	0		0	346.082	0	0		0	187.444	0	0		0	301.993	0	0
	0	188.485	0	0		0	135.577	0	0		0	348.004	0	0		0	188.485	0	0		0	303.034	0	0
	0	189.526	0	0		0	136.326	0	0		0	349.927	0	0		0	189.526	0	0		0	304.075	0	0
	0	190.568	0	0		0	137.075	0	0		0	351.85	0	0		0	190.568	0	0		0	305.117	0	0
	0	191.609	0	0		0	137.824	0	0		0	353.772	0	0		0	191.609	0	0		0	306.158	0	0
	0	192.65	0	0		0	138.573	0	0		0	355.695	0	0		0	192.65	0	0		0	307.199	0	0
	0	193.692	0	0		0	139.322	0	0		0	357.618	0	0		0	193.692	0	0		4.81626	308.241	1.5625	43.4511
	0	194.733	0	0		4.4467	140.071	3.1746	286.351		0	359.54	0	0		0	194.733	0	0		0	309.282	0	0
	12.2359	195.774	6.25	123.413		0	140.82	0	0		14.4585	361.463	4	224.445		12.2359	195.774	6.25	164.862		0	310.323	0	0
	0	196.816	0	0		0	141.569	0	0		0	363.386	0	0		0	196.816	0	0		0	311.365	0	0
	0	197.857	0	0		0	142.318	0	0		0	365.308	0	0		0	197.857	0	0		0	312.406	0	0
	0	198.899	0	0		0	143.067	0	0		0	367.231	0	0		0	198.899	0	0		0	313.447	0	0
	0	199.94	0	0		0	143.816	0	0		0	369.154	0	0		0	199.94	0	0		0	314.489	0	0
	0	200.981	0	0		0	144.565	0	0		0	371.076	0	0		0	200.981	0	0		0	315.53	0	0
	0	202.023	0	0		0	145.315	0	0		0	372.999	0	0		0	202.023	0	0		0	316.572	0	0
	0	203.064	0	0		0	146.064	0	0		0	374.922	0	0		0	203.064	0	0		0	317.613	0	0
	0	204.105	0	0		0	146.813	0	0		0	376.844	0	0		0	204.105	0	0		0	318.654	0	0
	12.8217	205.147	6.25	76.8442		0	147.562	0	0		0	378.767	0	0		12.8217	205.147	6.25	110.183		0	319.696	0	0
	0	206.188	0	0		0	148.311	0	0		0	380.69	0	0		0	206.188	0	0		0	320.737	0	0
	0	207.229	0	0		2.36603	149.06	1.5873	117.357		0	382.612	0	0		0	207.229	0	0		0	321.778	0	0
	0	208.271	0	0		0	149.809	0	0		0	384.535	0	0		0	208.271	0	0		0	322.82	0	0
	0	209.312	0	0		0	150.558	0	0		0	386.458	0	0		0	209.312	0	0		0	323.861	0	0
	0	210.353	0	0		0	151.307	0	0		0	388.38	0	0		0	210.353	0	0		0	324.902	0	0
	0	211.395	0	0		0	152.056	0	0		0	390.303	0	0		0	211.395	0	0		0	325.944	0	0
	0	212.436	0	0		0	152.805	0	0		0	392.226	0	0		0	212.436	0	0		5.10914	326.985	1.5625	79.8306
	0	213.477	0	0		0	153.554	0	0		0	394.149	0	0		0	213.477	0	0		0	328.026	0	0
	3.35186	214.519	1.5625	10.3138		0	154.303	0	0		0	396.071	0	0		3.35186	214.519	1.5625	16.6209		0	329.068	0	0
	0	215.56	0	0		0	155.052	0	0		0	397.994	0	0		0	215.56	0	0		0	330.109	0	0
	0	216.602	0	0		0	155.801	0	0		0	399.916	0	0		0	216.602	0	0		0	331.151	0	0
	0	217.643	0	0		0	156.55	0	0		0	401.839	0	0		0	217.643	0	0		0	332.192	0	0
	0	218.684	0	0		0	157.299	0	0		32.301	403.762	8	1098.99		0	218.684	0	0		0	333.233	0	0
	0	219.726	0	0		0	158.048	0	0		0	405.685	0	0		0	219.726	0	0		0	334.275	0	0
	0	220.767	0	0		0	158.797	0	0		0	407.607	0	0		0	220.767	0	0		0	335.316	0	0
	0	221.808	0	0		0	159.546	0	0		0	409.53	0	0		0	221.808	0	0		0	336.357	0	0
	0	222.85	0	0		0	160.295	0	0		0	411.453	0	0		0	222.85	0	0		0	337.399	0	0
	6.9966	223.891	3.125	8.32313		0	161.044	0	0		0	413.375	0	0		6.9966	223.891	3.125	16.8821		0	338.44	0	0
	0	224.932	0	0		0	161.793	0	0		0	415.298	0	0		0	224.932	0	0		0	339.481	0	0
	0	225.974	0	0		0	162.542	0	0		0	417.221	0	0		0	225.974	0	0		0	340.523	0	0
	0	227.015	0	0		0	163.292	0	0		0	419.143	0	0		0	227.015	0	0		0	341.564	0	0
	0	228.056	0	0		0	164.041	0	0		0	421.066	0	0		0	228.056	0	0		0	342.605	0	0
	0	229.098	0	0		0	164.79	0	0		0	422.989	0	0		0	229.098	0	0		0	343.647	0	0
	0	230.139	0	0		0	165.539	0	0		0	424.911	0	0		0	230.139	0	0		0	344.688	0	0
	0	231.18	0	0		0	166.288	0	0		0	426.834	0	0		0	231.18	0	0		5.40202	345.729	1.5625	127.19
	0	232.222	0	0		0	167.037	0	0		0	428.757	0	0		0	232.222	0	0		0	346.771	0	0
	0	233.263	0	0		0	167.786	0	0		0	430.679	0	0		0	233.263	0	0		0	347.812	0	0
	0	234.305	0	0		0	168.535	0	0		0	432.602	0	0		0	234.305	0	0		0	348.853	0	0
	0	235.346	0	0		0	169.284	0	0		0	434.525	0	0		0	235.346	0	0		0	349.895	0	0
	0	236.387	0	0		0	170.033	0	0		0	436.447	0	0		0	236.387	0	0		0	350.936	0	0
	0	237.429	0	0		0	170.782	0	0		0	438.37	0	0		0	237.429	0	0		0	351.978	0	0
	0	238.47	0	0		0	171.531	0	0		0	440.293	0	0		0	238.47	0	0		0	353.019	0	0
	0	239.511	0	0		0	172.28	0	0		0	442.215	0	0		0	239.511	0	0		0	354.06	0	0
	0	240.553	0	0		0	173.029	0	0		0	444.138	0	0		0	240.553	0	0		16.6454	355.102	4.6875	464.96
	0	241.594	0	0		0	173.778	0	0		0	446.061	0	0		0	241.594	0	0		0	356.143	0	0
	3.79118	242.635	1.5625	0.091837		0	174.527	0	0		0	447.983	0	0		3.79118	242.635	1.5625	0.31619		0	357.184	0	0
	0	243.677	0	0		0	175.276	0	0		0	449.906	0	0		0	243.677	0	0		0	358.226	0	0
	0	244.718	0	0		0	176.025	0	0		0	451.829	0	0		0	244.718	0	0		0	359.267	0	0
	0	245.76	0	0		0	176.774	0	0		0	453.751	0	0		0	245.76	0	0		0	360.308	0	0
	0	246.801	0	0		5.63566	177.523	3.1746	105.04		0	455.674	0	0		0	246.801	0	0		0	361.35	0	0
	0	247.842	0	0		0	178.273	0	0		18.3039	457.597	4	1170.2		0	247.842	0	0		0	362.391	0	0
	0	248.884	0	0		0	179.022	0	0		0	459.519	0	0		0	248.884	0	0		0	363.433	0	0
	0	249.925	0	0		0	179.771	0	0		0	461.442	0	0		0	249.925	0	0		0	364.474	0	0
	0	250.966	0	0		0	180.52	0	0		0	463.365	0	0		0	250.966	0	0		0	365.515	0	0
	11.8129	252.008	4.6875	6.52308		0	181.269	0	0		0	465.288	0	0		11.8129	252.008	4.6875	1.11344		0	366.557	0	0
	0	253.049	0	0		0	182.018	0	0		0	467.21	0	0		0	253.049	0	0		0	367.598	0	0
	0	254.09	0	0		0	182.767	0	0		0	469.133	0	0		0	254.09	0	0		0	368.639	0	0
	0	255.132	0	0		0	183.516	0	0		0	471.055	0	0		0	255.132	0	0		0	369.681	0	0
	0	256.173	0	0		0	184.265	0	0		0	472.978	0	0		0	256.173	0	0		0	370.722	0	0
	0	257.214	0	0		0	185.014	0	0		0	474.901	0	0		0	257.214	0	0		0	371.763	0	0
	0	258.256	0	0		0	185.763	0	0		0	476.824	0	0		0	258.256	0	0		0	372.805	0	0
	0	259.297	0	0		11.842	186.512	6.34921	149.554		0	478.746	0	0		0	259.297	0	0		0	373.846	0	0
	0	260.339	0	0		0	187.261	0	0		0	480.669	0	0		0	260.339	0	0		0	374.887	0	0
	28.5884	261.38	10.9375	49.0128		0	188.01	0	0		0	482.592	0	0		28.5884	261.38	10.9375	22.1973		0	375.929	0	0
	0	262.421	0	0		0	188.759	0	0		0	484.514	0	0		0	262.421	0	0		0	376.97	0	0
	0	263.462	0	0		0	189.508	0	0		0	486.437	0	0		0	263.462	0	0		0	378.011	0	0
	0	264.504	0	0		0	190.257	0	0		0	488.36	0	0		0	264.504	0	0		0	379.053	0	0
	0	265.545	0	0		0	191.006	0	0		0	490.282	0	0		0	265.545	0	0		0	380.094	0	0
	0	266.587	0	0		0	191.755	0	0		0	492.205	0	0		0	266.587	0	0		0	381.135	0	0
	0	267.628	0	0		0	192.504	0	0		0	494.128	0	0		0	267.628	0	0		0	382.177	0	0
	0	268.669	0	0		0	193.253	0	0		0	496.05	0	0		0	268.669	0	0		0	383.218	0	0
	0	269.711	0	0		0	194.002	0	0		0	497.973	0	0		0	269.711	0	0		0	384.26	0	0
	25.383	270.752	9.375	87.4454		0	194.751	0	0		0	499.896	0	0		25.383	270.752	9.375	52.2953		0	385.301	0	0
	0	271.793	0	0		0	195.5	0	0		0	501.818	0	0		0	271.793	0	0		0	386.342	0	0
	0	272.835	0	0		6.23014	196.25	3.1746	47.7813		0	503.741	0	0		0	272.835	0	0		0	387.384	0	0
	0	273.876	0	0		0	196.999	0	0		0	505.664	0	0		0	273.876	0	0		0	388.425	0	0
	0	274.917	0	0		0	197.748	0	0		0	507.586	0	0		0	274.917	0	0		0	389.466	0	0
	0	275.959	0	0		0	198.497	0	0		0	509.509	0	0		0	275.959	0	0		0	390.508	0	0
	0	277	0	0		0	199.246	0	0		0	511.432	0	0		0	277	0	0		0	391.549	0	0
	0	278.041	0	0		0	199.995	0	0		0	513.354	0	0		0	278.041	0	0		6.13422	392.59	1.5625	293.624
	0	279.083	0	0		0	200.744	0	0		0	515.277	0	0		0	279.083	0	0		0	393.632	0	0
	21.8847	280.124	7.8125	124.458		0	201.493	0	0		0	517.2	0	0		21.8847	280.124	7.8125	85.0283		0	394.673	0	0
	0	281.166	0	0		0	202.242	0	0		0	519.122	0	0		0	281.166	0	0		0	395.714	0	0
	0	282.207	0	0		0	202.991	0	0		0	521.045	0	0		0	282.207	0	0		0	396.756	0	0
	0	283.248	0	0		0	203.74	0	0		0	522.968	0	0		0	283.248	0	0		0	397.797	0	0
	0	284.29	0	0		0	204.489	0	0		0	524.89	0	0		0	284.29	0	0		0	398.839	0	0
	0	285.331	0	0		3.25775	205.238	1.5873	14.1027		0	526.813	0	0		0	285.331	0	0		0	399.88	0	0
	0	286.372	0	0		0	205.987	0	0		0	528.736	0	0		0	286.372	0	0		0	400.921	0	0
	0	287.414	0	0		0	206.736	0	0		0	530.659	0	0		0	287.414	0	0		0	401.963	0	0
	0	288.455	0	0		0	207.485	0	0		0	532.581	0	0		0	288.455	0	0		0	403.004	0	0
	4.52338	289.496	1.5625	37.9537		0	208.234	0	0		0	534.504	0	0		4.52338	289.496	1.5625	28.0403		0	404.045	0	0
	0	290.538	0	0		0	208.983	0	0		0	536.427	0	0		0	290.538	0	0		0	405.087	0	0
	0	291.579	0	0		0	209.732	0	0		0	538.349	0	0		0	291.579	0	0		0	406.128	0	0
	0	292.62	0	0		0	210.481	0	0		0	540.272	0	0		0	292.62	0	0		0	407.169	0	0
	0	293.662	0	0		0	211.23	0	0		0	542.194	0	0		0	293.662	0	0		0	408.211	0	0
	0	294.703	0	0		0	211.979	0	0		0	544.117	0	0		0	294.703	0	0		0	409.252	0	0
	0	295.745	0	0		0	212.728	0	0		0	546.04	0	0		0	295.745	0	0		6.41083	410.293	1.5625	374.358
	0	296.786	0	0		0	213.477	0	0		0	547.963	0	0		0	296.786	0	0		0	411.335	0	0
	0	297.827	0	0		0	214.227	0	0		0	549.885	0	0		0	297.827	0	0		0	412.376	0	0
	14.0095	298.868	4.6875	161.283		13.6492	214.976	6.34921	25.574		0	551.808	0	0		14.0095	298.868	4.6875	125.46		0	413.418	0	0
	0	299.91	0	0		0	215.725	0	0		0	553.731	0	0		0	299.91	0	0		0	414.459	0	0
	0	300.951	0	0		0	216.474	0	0		0	555.653	0	0		0	300.951	0	0		0	415.5	0	0
	0	301.993	0	0		0	217.223	0	0		0	557.576	0	0		0	301.993	0	0		0	416.541	0	0
	0	303.034	0	0		0	217.972	0	0		0	559.499	0	0		0	303.034	0	0		0	417.583	0	0
	0	304.075	0	0		0	218.721	0	0		0	561.421	0	0		0	304.075	0	0		0	418.624	0	0
	0	305.117	0	0		0	219.47	0	0		0	563.344	0	0		0	305.117	0	0		0	419.666	0	0
	0	306.158	0	0		0	220.219	0	0		0	565.267	0	0		0	306.158	0	0		0	420.707	0	0
	0	307.199	0	0		0	220.968	0	0		0	567.189	0	0		0	307.199	0	0		0	421.748	0	0
	4.81626	308.241	1.5625	72.3131		0	221.717	0	0		0	569.112	0	0		4.81626	308.241	1.5625	58.3445		0	422.79	0	0
	0	309.282	0	0		0	222.466	0	0		0	571.035	0	0		0	309.282	0	0		0	423.831	0	0
	0	310.323	0	0		0	223.215	0	0		0	572.957	0	0		0	310.323	0	0		0	424.872	0	0
	0	311.365	0	0		7.10997	223.964	3.1746	3.89816		0	574.88	0	0		0	311.365	0	0		0	425.914	0	0
	0	312.406	0	0		0	224.713	0	0		0	576.803	0	0		0	312.406	0	0		0	426.955	0	0
	0	313.447	0	0		0	225.462	0	0		0	578.725	0	0		0	313.447	0	0		0	427.996	0	0
	0	314.489	0	0		0	226.211	0	0		0	580.648	0	0		0	314.489	0	0		0	429.038	0	0
	0	315.53	0	0		0	226.96	0	0		0	582.571	0	0		0	315.53	0	0		0	430.079	0	0
	0	316.572	0	0		0	227.709	0	0		0	584.493	0	0		0	316.572	0	0		0	431.12	0	0
	0	317.613	0	0		0	228.458	0	0		0	586.416	0	0		0	317.613	0	0		0	432.162	0	0
	0	318.654	0	0		0	229.208	0	0		0	588.339	0	0		0	318.654	0	0		0	433.203	0	0
	0	319.696	0	0		0	229.957	0	0		0	590.261	0	0		0	319.696	0	0		0	434.245	0	0
	0	320.737	0	0		0	230.706	0	0		0	592.184	0	0		0	320.737	0	0		0	435.286	0	0
	0	321.778	0	0		0	231.455	0	0		0	594.107	0	0		0	321.778	0	0		0	436.327	0	0
	0	322.82	0	0		0	232.204	0	0		0	596.029	0	0		0	322.82	0	0		0	437.369	0	0
	0	323.861	0	0		0	232.953	0	0		0	597.952	0	0		0	323.861	0	0		0	438.41	0	0
	0	324.902	0	0		11.1287	233.702	4.7619	0.0859593		0	599.875	0	0		0	324.902	0	0		0	439.451	0	0
	0	325.944	0	0		0	234.451	0	0		0	601.797	0	0		0	325.944	0	0		0	440.493	0	0
	5.10914	326.985	1.5625	117.652		0	235.2	0	0		0	603.72	0	0		5.10914	326.985	1.5625	99.6284		0	441.534	0	0
	0	328.026	0	0		0	235.949	0	0		0	605.643	0	0		0	328.026	0	0		0	442.575	0	0
	0	329.068	0	0		0	236.698	0	0		0	607.566	0	0		0	329.068	0	0		0	443.617	0	0
	0	330.109	0	0		0	237.447	0	0		0	609.488	0	0		0	330.109	0	0		0	444.658	0	0
	0	331.151	0	0		0	238.196	0	0		0	611.411	0	0		0	331.151	0	0		0	445.699	0	0
	0	332.192	0	0		0	238.945	0	0		0	613.333	0	0		0	332.192	0	0		0	446.741	0	0
	0	333.233	0	0		0	239.694	0	0		0	615.256	0	0		0	333.233	0	0		0	447.782	0	0
	0	334.275	0	0		0	240.443	0	0		0	617.179	0	0		0	334.275	0	0		0	448.824	0	0
	0	335.316	0	0		0	241.192	0	0		0	619.102	0	0		0	335.316	0	0		0	449.865	0	0
	0	336.357	0	0		0	241.941	0	0		0	621.024	0	0		0	336.357	0	0		0	450.906	0	0
	0	337.399	0	0		19.2611	242.69	7.93651	4.6385		0	622.947	0	0		0	337.399	0	0		0	451.948	0	0
	0	338.44	0	0		0	243.439	0	0		0	624.87	0	0		0	338.44	0	0		0	452.989	0	0
	0	339.481	0	0		0	244.188	0	0		0	626.792	0	0		0	339.481	0	0		0	454.03	0	0
	0	340.523	0	0		0	244.937	0	0		0	628.715	0	0		0	340.523	0	0		0	455.072	0	0
	0	341.564	0	0		0	245.686	0	0		0	630.638	0	0		0	341.564	0	0		0	456.113	0	0
	0	342.605	0	0		0	246.435	0	0		0	632.56	0	0		0	342.605	0	0		0	457.154	0	0
	0	343.647	0	0		0	247.185	0	0		0	634.483	0	0		0	343.647	0	0		0	458.196	0	0
	0	344.688	0	0		0	247.934	0	0		0	636.406	0	0		0	344.688	0	0		0	459.237	0	0
	5.40202	345.729	1.5625	173.971		0	248.683	0	0		0	638.328	0	0		5.40202	345.729	1.5625	151.892		0	460.278	0	0
	0	346.771	0	0		0	249.432	0	0		0	640.251	0	0		0	346.771	0	0		0	461.32	0	0
	0	347.812	0	0		0	250.181	0	0		0	642.174	0	0		0	347.812	0	0		0	462.361	0	0
	0	348.853	0	0		0	250.93	0	0		0	644.096	0	0		0	348.853	0	0		0	463.402	0	0
	0	349.895	0	0		0	251.679	0	0		0	646.019	0	0		0	349.895	0	0		0	464.444	0	0
	0	350.936	0	0		4.00679	252.428	1.5873	4.79608		0	647.942	0	0		0	350.936	0	0		0	465.485	0	0
	0	351.978	0	0		0	253.177	0	0		0	649.864	0	0		0	351.978	0	0		0	466.526	0	0
	0	353.019	0	0		0	253.926	0	0		0	651.787	0	0		0	353.019	0	0		0	467.568	0	0
	0	354.06	0	0		0	254.675	0	0		0	653.71	0	0		0	354.06	0	0		0	468.609	0	0
	16.6454	355.102	4.6875	618.743		0	255.424	0	0		0	655.632	0	0		16.6454	355.102	4.6875	546.423		0	469.651	0	0
	0	356.143	0	0		0	256.173	0	0		0	657.555	0	0		0	356.143	0	0		0	470.692	0	0
	0	357.184	0	0		0	256.922	0	0		0	659.478	0	0		0	357.184	0	0		0	471.733	0	0
	0	358.226	0	0		0	257.671	0	0		0	661.4	0	0		0	358.226	0	0		0	472.775	0	0
	0	359.267	0	0		0	258.42	0	0		0	663.323	0	0		0	359.267	0	0		0	473.816	0	0
	0	360.308	0	0		0	259.169	0	0		0	665.246	0	0		0	360.308	0	0		0	474.857	0	0
	0	361.35	0	0		0	259.918	0	0		0	667.168	0	0		0	361.35	0	0		7.43592	475.899	1.5625	758.947
	0	362.391	0	0		0	260.667	0	0		0	669.091	0	0		0	362.391	0	0		0	476.94	0	0
	0	363.433	0	0		12.4484	261.416	4.7619	33.1158		0	671.014	0	0		0	363.433	0	0		0	477.981	0	0
	0	364.474	0	0		0	262.165	0	0		0	672.936	0	0		0	364.474	0	0		0	479.023	0	0
	0	365.515	0	0		0	262.914	0	0		0	674.859	0	0		0	365.515	0	0		0	480.064	0	0
	0	366.557	0	0		0	263.663	0	0		0	676.782	0	0		0	366.557	0	0		0	481.106	0	0
	0	367.598	0	0		0	264.413	0	0		0	678.705	0	0		0	367.598	0	0		0	482.147	0	0
	0	368.639	0	0		0	265.162	0	0		27.2251	680.627	4	6211.7		0	368.639	0	0		0	483.188	0	0
	0	369.681	0	0		0	265.911	0	0		0	682.55	0	0		0	369.681	0	0		0	484.229	0	0
	0	370.722	0	0		0	266.66	0	0		0	684.472	0	0		0	370.722	0	0		0	485.271	0	0
	0	371.763	0	0		0	267.409	0	0		0	686.395	0	0		0	371.763	0	0		0	486.312	0	0
	0	372.805	0	0		0	268.158	0	0		0	688.318	0	0		0	372.805	0	0		0	487.354	0	0
	0	373.846	0	0		0	268.907	0	0		0	690.24	0	0		0	373.846	0	0		0	488.395	0	0
	0	374.887	0	0		0	269.656	0	0		0	692.163	0	0		0	374.887	0	0		0	489.436	0	0
	0	375.929	0	0		12.8764	270.405	4.7619	59.5383		0	694.086	0	0		0	375.929	0	0		0	490.478	0	0
	0	376.97	0	0		0	271.154	0	0		0	696.009	0	0		0	376.97	0	0		0	491.519	0	0
	0	378.011	0	0		0	271.903	0	0		0	697.931	0	0		0	378.011	0	0		0	492.56	0	0
	0	379.053	0	0		0	272.652	0	0		0	699.854	0	0		0	379.053	0	0		0	493.602	0	0
	0	380.094	0	0		0	273.401	0	0		0	701.777	0	0		0	380.094	0	0		0	494.643	0	0
	0	381.135	0	0		0	274.15	0	0		0	703.699	0	0		0	381.135	0	0		0	495.684	0	0
	0	382.177	0	0		0	274.899	0	0		0	705.622	0	0		0	382.177	0	0		0	496.726	0	0
	0	383.218	0	0		0	275.648	0	0		0	707.545	0	0		0	383.218	0	0		0	497.767	0	0
	0	384.26	0	0		0	276.397	0	0		0	709.467	0	0		0	384.26	0	0		0	498.808	0	0
	0	385.301	0	0		0	277.146	0	0		0	711.39	0	0		0	385.301	0	0		0	499.85	0	0
	0	386.342	0	0		0	277.895	0	0		0	713.313	0	0		0	386.342	0	0		0	500.891	0	0
	0	387.384	0	0		0	278.644	0	0		0	715.235	0	0		0	387.384	0	0		0	292.237	0	0
	0	388.425	0	0		0	279.393	0	0		0	717.158	0	0		0	388.425	0	0		0	293.022	0	0
	0	389.466	0	0		13.3401	280.142	4.7619	96.8458		0	719.081	0	0		0	389.466	0	0		0	293.808	0	0
	0	390.508	0	0		0	280.892	0	0		0	721.003	0	0		0	390.508	0	0		0	294.594	0	0
	0	391.549	0	0		0	281.64	0	0		0	722.926	0	0		0	391.549	0	0		0	295.379	0	0
	6.13422	392.59	1.5625	362.804		0	282.39	0	0		0	724.849	0	0		6.13422	392.59	1.5625	330.588		0	296.165	0	0
	0	393.632	0	0		0	283.139	0	0		0	726.771	0	0		0	393.632	0	0		0	296.95	0	0
	0	394.673	0	0		0	283.888	0	0		0	728.694	0	0		0	394.673	0	0		0	297.736	0	0
	0	395.714	0	0		0	284.637	0	0		0	730.617	0	0		0	395.714	0	0		0	298.521	0	0
	0	396.756	0	0		0	285.386	0	0		0	732.539	0	0		0	396.756	0	0		0	299.307	0	0
	0	397.797	0	0		0	286.135	0	0		0	734.462	0	0		0	397.797	0	0		0	300.093	0	0
	0	398.839	0	0		0	286.884	0	0		0	736.385	0	0		0	398.839	0	0		0	300.878	0	0
	0	399.88	0	0		0	287.633	0	0		0	738.307	0	0		0	399.88	0	0		0	301.664	0	0
	0	400.921	0	0		0	288.382	0	0		0	740.23	0	0		0	400.921	0	0		0	302.449	0	0
	0	401.963	0	0		4.58938	289.131	1.5873	46.4328		0	742.153	0	0		0	401.963	0	0		0	303.235	0	0
	0	403.004	0	0		0	289.88	0	0		0	744.075	0	0		0	403.004	0	0		0	304.021	0	0
	0	404.045	0	0		0	290.629	0	0		0	745.998	0	0		0	404.045	0	0		0	304.806	0	0
	0	405.087	0	0		0	291.378	0	0		0	747.921	0	0		0	405.087	0	0		0	305.592	0	0
	0	406.128	0	0		0	292.127	0	0		0	749.843	0	0		0	406.128	0	0		0	306.377	0	0
	0	407.169	0	0		0	292.876	0	0		0	751.766	0	0		0	407.169	0	0		0	307.163	0	0
	0	408.211	0	0		0	293.625	0	0		0	753.689	0	0		0	408.211	0	0		0	307.948	0	0
	0	409.252	0	0		0	294.374	0	0		0	755.611	0	0		0	409.252	0	0		0	308.734	0	0
	6.41083	410.293	1.5625	452		0	295.123	0	0		0	757.534	0	0		6.41083	410.293	1.5625	415.954		0	309.52	0	0
	0	411.335	0	0		0	295.872	0	0		0	759.457	0	0		0	411.335	0	0		0	310.305	0	0
	0	412.376	0	0		0	296.621	0	0		0	761.38	0	0		0	412.376	0	0		0	311.091	0	0
	0	413.418	0	0		0	297.37	0	0		0	763.302	0	0		0	413.418	0	0		0	311.876	0	0
	0	414.459	0	0		0	298.12	0	0		0	765.225	0	0		0	414.459	0	0		0	312.662	0	0
	0	415.5	0	0		18.9758	298.868	6.34921	258.629		0	767.148	0	0		0	415.5	0	0		0	313.447	0	0
	0	416.541	0	0		0	299.618	0	0		0	769.07	0	0		0	416.541	0	0		0	314.233	0	0
	0	417.583	0	0		0	300.367	0	0		0	770.993	0	0		0	417.583	0	0		0	315.019	0	0
	0	418.624	0	0		0	301.116	0	0		0	772.916	0	0		0	418.624	0	0		0	315.804	0	0
	0	419.666	0	0		0	301.865	0	0		0	774.838	0	0		0	419.666	0	0		0	316.59	0	0
	0	420.707	0	0		0	302.614	0	0		0	776.761	0	0		0	420.707	0	0		0	317.375	0	0
	0	421.748	0	0		0	303.363	0	0		0	778.684	0	0		0	421.748	0	0		0	318.161	0	0
	0	422.79	0	0		0	304.112	0	0		0	780.606	0	0		0	422.79	0	0		0	318.947	0	0
	0	423.831	0	0		0	304.861	0	0		0	782.529	0	0		0	423.831	0	0		0	319.732	0	0
	0	424.872	0	0		0	305.61	0	0		0	784.452	0	0		0	424.872	0	0		0	320.518	0	0
	0	425.914	0	0		0	306.359	0	0		0	786.374	0	0		0	425.914	0	0		0	321.303	0	0
	0	426.955	0	0		0	307.108	0	0		0	788.297	0	0		0	426.955	0	0		0	322.089	0	0
	0	427.996	0	0		14.6599	307.857	4.7619	252.455		0	790.22	0	0		0	427.996	0	0		0	322.875	0	0
	0	429.038	0	0		0	308.606	0	0		0	792.142	0	0		0	429.038	0	0		0	323.66	0	0
	0	430.079	0	0		0	309.355	0	0		0	794.065	0	0		0	430.079	0	0		0	324.446	0	0
	0	431.12	0	0		0	310.104	0	0		0	795.988	0	0		0	431.12	0	0		0	325.231	0	0
	0	432.162	0	0		0	310.853	0	0		0	797.91	0	0		0	432.162	0	0		0	326.017	0	0
	0	433.203	0	0		0	311.602	0	0		0	799.833	0	0		0	433.203	0	0		0	326.802	0	0
	0	434.245	0	0		0	312.351	0	0		0	801.756	0	0		0	434.245	0	0		0	327.588	0	0
	0	435.286	0	0		0	313.1	0	0		0	803.678	0	0		0	435.286	0	0		0	328.374	0	0
	0	436.327	0	0		0	313.849	0	0		0	805.601	0	0		0	436.327	0	0		0	329.159	0	0
	0	437.369	0	0		0	314.599	0	0		0	807.524	0	0		0	437.369	0	0		0	329.945	0	0
	0	438.41	0	0		0	315.348	0	0		0	809.446	0	0		0	438.41	0	0		0	330.73	0	0
	0	439.451	0	0		0	316.097	0	0		0	811.369	0	0		0	439.451	0	0		0	331.516	0	0
	0	440.493	0	0		0	316.846	0	0		0	813.292	0	0		0	440.493	0	0		0	332.301	0	0
	0	441.534	0	0		20.1647	317.595	6.34921	432.66		0	815.214	0	0		0	441.534	0	0		0	333.087	0	0
	0	442.575	0	0		0	318.344	0	0		0	817.137	0	0		0	442.575	0	0		0	333.873	0	0
	0	443.617	0	0		0	319.093	0	0		0	819.06	0	0		0	443.617	0	0		0	334.658	0	0
	0	444.658	0	0		0	319.842	0	0		0	820.982	0	0		0	444.658	0	0		0	335.444	0	0
	0	445.699	0	0		0	320.591	0	0		0	822.905	0	0		0	445.699	0	0		0	336.229	0	0
	0	446.741	0	0		0	321.34	0	0		0	824.828	0	0		0	446.741	0	0		0	337.015	0	0
	0	447.782	0	0		0	322.089	0	0		0	826.75	0	0		0	447.782	0	0		0	337.801	0	0
	0	448.824	0	0		0	322.838	0	0		33.1469	828.673	4	11755.7		0	448.824	0	0		0	338.586	0	0
	0	449.865	0	0		0	323.587	0	0		0	830.596	0	0		0	449.865	0	0		0	339.372	0	0
	0	450.906	0	0		0	324.336	0	0		0	832.519	0	0		0	450.906	0	0		0	340.157	0	0
	0	451.948	0	0		0	325.085	0	0		0	834.441	0	0		0	451.948	0	0		0	340.943	0	0
	0	452.989	0	0		0	325.834	0	0		0	836.364	0	0		0	452.989	0	0		0	341.728	0	0
	0	454.03	0	0		10.3677	326.583	3.1746	266.006		0	838.287	0	0		0	454.03	0	0		0	342.514	0	0
	0	455.072	0	0		0	327.332	0	0		0	840.209	0	0		0	455.072	0	0		0	343.3	0	0
	0	456.113	0	0		0	328.081	0	0		0	842.132	0	0		0	456.113	0	0		0	344.085	0	0
	0	457.154	0	0		0	328.83	0	0		0	844.055	0	0		0	457.154	0	0		0	344.871	0	0
	0	458.196	0	0		0	329.579	0	0		0	845.977	0	0		0	458.196	0	0		0	345.656	0	0
	0	459.237	0	0		0	330.328	0	0		0	847.9	0	0		0	459.237	0	0		0	346.442	0	0
	0	460.278	0	0		0	331.077	0	0		0	849.823	0	0		0	460.278	0	0		0	347.228	0	0
	0	461.32	0	0		0	331.827	0	0		0	851.745	0	0		0	461.32	0	0		0	348.013	0	0
	0	462.361	0	0		0	332.575	0	0		0	853.668	0	0		0	462.361	0	0		0	348.799	0	0
	0	463.402	0	0		0	333.325	0	0		0	855.591	0	0		0	463.402	0	0		0	349.584	0	0
	0	464.444	0	0		0	334.074	0	0		0	857.513	0	0		0	464.444	0	0		0	350.37	0	0
	0	465.485	0	0		0	334.823	0	0		0	859.436	0	0		0	465.485	0	0		0	351.156	0	0
	0	466.526	0	0		0	335.572	0	0		0	861.359	0	0		0	466.526	0	0		0	351.941	0	0
	0	467.568	0	0		5.33843	336.321	1.5873	162.805		0	863.281	0	0		0	467.568	0	0		0	352.727	0	0
	0	468.609	0	0		0	337.07	0	0		0	865.204	0	0		0	468.609	0	0		0	353.512	0	0
	0	469.651	0	0		0	337.819	0	0		0	867.127	0	0		0	469.651	0	0		0	354.298	0	0
	0	470.692	0	0		0	338.568	0	0		0	869.049	0	0		0	470.692	0	0		0	355.083	0	0
	0	471.733	0	0		0	339.317	0	0		0	870.972	0	0		0	471.733	0	0		0	355.869	0	0
	0	472.775	0	0		0	340.066	0	0		0	872.895	0	0		0	472.775	0	0		0	356.654	0	0
	0	473.816	0	0		0	340.815	0	0		0	874.817	0	0		0	473.816	0	0		0	357.44	0	0
	0	474.857	0	0		0	341.564	0	0		0	876.74	0	0		0	474.857	0	0		0	358.226	0	0
	7.43592	475.899	1.5625	867.948		0	342.313	0	0		0	878.663	0	0		7.43592	475.899	1.5625	817.709		0	359.011	0	0
	0	476.94	0	0		0	343.062	0	0		0	880.585	0	0		0	476.94	0	0		0	359.797	0	0
	0	477.981	0	0		0	343.811	0	0		0	882.508	0	0		0	477.981	0	0		0	360.582	0	0
	0	479.023	0	0		0	344.56	0	0		0	884.431	0	0		0	479.023	0	0		0	361.368	0	0
	0	480.064	0	0		0	345.309	0	0		0	886.353	0	0		0	480.064	0	0		0	362.154	0	0
	0	481.106	0	0		0	346.058	0	0		0	888.276	0	0		0	481.106	0	0		0	362.939	0	0
	0	482.147	0	0		0	346.807	0	0		0	890.199	0	0		0	482.147	0	0		0	363.725	0	0
	0	483.188	0	0		0	347.556	0	0		0	892.121	0	0		0	483.188	0	0		0	364.51	0	0
	0	484.229	0	0		0	348.305	0	0		0	894.044	0	0		0	484.229	0	0		0	365.296	0	0
	0	485.271	0	0		0	349.055	0	0		0	895.967	0	0		0	485.271	0	0		0	366.082	0	0
	0	486.312	0	0		0	349.803	0	0		0	897.889	0	0		0	486.312	0	0		0	366.867	0	0
	0	487.354	0	0		0	350.553	0	0		0	899.812	0	0		0	487.354	0	0		0	367.653	0	0
	0	488.395	0	0		0	351.302	0	0		0	901.735	0	0		0	488.395	0	0		0	368.438	0	0
	0	489.436	0	0		0	352.051	0	0		0	903.658	0	0		0	489.436	0	0		0	369.224	0	0
	0	490.478	0	0		0	352.8	0	0		0	905.58	0	0		0	490.478	0	0		0	370.01	0	0
	0	491.519	0	0		0	353.549	0	0		0	907.503	0	0		0	491.519	0	0		0	370.795	0	0
	0	492.56	0	0		0	354.298	0	0		0	909.426	0	0		0	492.56	0	0		0	371.581	0	0
	0	493.602	0	0		5.63567	355.047	1.5873	228.578		0	911.348	0	0		0	493.602	0	0		0	372.366	0	0
	0	494.643	0	0		0	355.796	0	0		0	913.271	0	0		0	494.643	0	0		0	373.152	0	0
	0	495.684	0	0		0	356.545	0	0		0	915.194	0	0		0	495.684	0	0		0	373.937	0	0
	0	496.726	0	0		0	357.294	0	0		0	917.116	0	0		0	496.726	0	0		0	374.723	0	0
	0	497.767	0	0		0	358.043	0	0		0	919.039	0	0		0	497.767	0	0		0	375.509	0	0
	0	498.808	0	0		0	358.792	0	0		0	920.962	0	0		0	498.808	0	0		0	376.294	0	0
	0	499.85	0	0		0	359.541	0	0		0	922.884	0	0		0	499.85	0	0		0	377.08	0	0
	0	500.891	0	0		0	360.29	0	0		0	924.807	0	0		0	500.891	0	0		0	377.865	0	0
	0	501.933	0	0		0	361.039	0	0		0	926.73	0	0		0	334.622	0	0		0	378.651	0	0
	0	502.974	0	0		0	361.788	0	0		0	928.652	0	0		0	335.316	0	0		0	379.436	0	0
	0	504.015	0	0		0	362.537	0	0		0	930.575	0	0		0	336.01	0	0		0	380.222	0	0
	0	505.057	0	0		0	363.286	0	0		0	932.498	0	0		0	336.704	0	0		0	381.008	0	0
	0	506.098	0	0		5.77834	364.035	1.5873	264.103		0	934.42	0	0		0	337.399	0	0		0	381.793	0	0
	0	507.139	0	0		0	364.784	0	0		0	936.343	0	0		0	338.093	0	0		0	382.579	0	0
	0	508.181	0	0		0	365.534	0	0		0	938.266	0	0		0	338.787	0	0		0	383.364	0	0
	0	509.222	0	0		0	366.283	0	0		0	940.188	0	0		0	339.481	0	0		0	384.15	0	0
	0	510.263	0	0		0	367.031	0	0		0	942.111	0	0		0	340.176	0	0		0	384.935	0	0
	0	511.305	0	0		0	367.781	0	0		0	944.034	0	0		0	340.87	0	0		0	385.721	0	0
	0	512.346	0	0		0	368.53	0	0		0	945.956	0	0		0	341.564	0	0		0	386.507	0	0
	0	513.387	0	0		0	369.279	0	0		0	947.879	0	0		0	342.258	0	0		0	387.292	0	0
	0	514.429	0	0		0	370.028	0	0		0	949.802	0	0		0	342.952	0	0		0	388.078	0	0
	0	515.47	0	0		0	370.777	0	0		0	951.724	0	0		0	343.647	0	0		0	388.863	0	0
	0	516.511	0	0		0	371.526	0	0		0	953.647	0	0		0	344.341	0	0		0	389.649	0	0
	0	517.553	0	0		0	372.275	0	0		0	955.57	0	0		0	345.035	0	0		0	390.435	0	0
	0	518.594	0	0		0	373.024	0	0		0	957.492	0	0		0	345.729	0	0		0	391.22	0	0
	0	519.635	0	0		5.93291	373.773	1.5873	305.482		0	959.415	0	0		0	346.424	0	0		19.6003	392.006	5	931.6
	0	520.677	0	0		0	374.522	0	0		0	961.338	0	0		0	347.118	0	0		0	392.791	0	0
	0	521.718	0	0		0	375.271	0	0		0	963.26	0	0		0	347.812	0	0		0	393.577	0	0
	0	522.76	0	0		0	376.02	0	0		0	965.183	0	0		0	348.506	0	0		0	394.363	0	0
	0	523.801	0	0		0	376.769	0	0		0	967.106	0	0		0	349.201	0	0		0	395.148	0	0
	0	524.842	0	0		0	377.518	0	0		0	969.028	0	0		0	349.895	0	0		0	395.934	0	0
	0	525.884	0	0		0	378.267	0	0		0	970.951	0	0		0	350.589	0	0		0	396.719	0	0
	0	526.925	0	0		0	379.016	0	0		0	972.874	0	0		0	351.283	0	0		0	397.505	0	0
	0	527.966	0	0		0	379.765	0	0		0	974.797	0	0		0	351.978	0	0		0	398.29	0	0
	0	529.008	0	0		0	380.514	0	0		0	976.719	0	0		0	352.672	0	0		0	399.076	0	0
	0	530.049	0	0		0	381.263	0	0		0	978.642	0	0		0	353.366	0	0		0	399.862	0	0
	0	531.09	0	0		0	382.012	0	0		0	980.565	0	0		0	354.06	0	0		0	400.647	0	0
	8.31456	532.132	1.5625	1331.53		6.07558	382.762	1.5873	346.351		39.2995	982.487	4	19372.8		14.1902	354.755	4	463.288		20.0716	401.433	5	1064.72
	0			0		0			0		0			0		0			0		0			0
	0			0		0			0		0			0		0			0		0			0
	0			0		0			0		0			0		0			0		0			0
	0			0		0			0		0			0		0			0		0			0
	0			0		0			0		0			0		0			0		0			0
	0			0		0			0		0			0		0			0		0			0
	0			0		0			0		0			0		0			0		0			0
	0			0		0			0		0			0		0			0		0			0
	0			0		0			0		0			0		0			0		0			0
	0			0		0			0		0			0		0			0		0			0
	0			0		0			0		0			0		0			0		0			0
	0			0		0			0		0			0		0			0		0			0
	0			0		0			0		0			0		0			0		0			0
	0			0		0			0		0			0		0			0		0			0
	0			0		0			0		0			0		0			0		0			0
	0			0		0			0		0			0		0			0		0			0
	0			0		0			0		0			0		0			0		0			0
	0			0		0			0		0			0		0			0		0			0
	0			0		0			0		0			0		0			0		0			0
	0			0		0			0		0			0		0			0		0			0
	0			0		0			0		0			0		0			0		0			0
	0			0		0			0		0			0		0			0		0			0
	0			0		0			0		0			0		0			0		0			0
	0			0		0			0		0			0		0			0		0			0
	0			0		0			0		0			0		0			0		0			0
	0			0		0			0		0			0		0			0		0			0
	0			0		0			0		0			0		0			0		0			0
	0			0		0			0		0			0		0			0		0			0
	0			0		0			0		0			0		0			0		0			0
	0			0		0			0		0			0		0			0		0			0
	0			0		0			0		0			0		0			0		0			0
	0			0		0			0		0			0		0			0		0			0
	0			0		0			0		0			0		0			0		0			0
	0			0		0			0		0			0		0			0		0			0
	0			0		0			0		0			0		0			0		0			0
	0			0		0			0		0			0		0			0		0			0
	0			0		0			0		0			0		0			0		0			0
	0			0		0			0		0			0		0			0		0			0
	0			0		0			0		0			0		0			0		0			0
	0			0		0			0		0			0		0			0		0			0
	0			0		0			0		0			0		0			0		0			0
	0			0		0			0		0			0		0			0		0			0
	0			0		0			0		0			0		0			0		0			0
	0			0		0			0		0			0		0			0		0			0
	0			0		0			0		0			0		0			0		0			0
	0			0		0			0		0			0		0			0		0			0
	0			0		0			0		0			0		0			0		0			0
	0			0		0			0		0			0		0			0		0			0
	0			0		0			0		0			0		0			0		0			0
	0			0		0			0		0			0		0			0		0			0
	0			0		0			0		0			0		0			0		0			0
	0			0		0			0		0			0		0			0		0			0
	0			0		0			0		0			0		0			0		0			0
	0			0		0			0		0			0		0			0		0			0
	0			0		0			0		0			0		0			0		0			0
	0			0		0			0		0			0		0			0		0			0
	0			0		0			0		0			0		0			0		0			0
	0			0		0			0		0			0		0			0		0			0
	0			0		0			0		0			0		0			0		0			0
	0			0		0			0		0			0		0			0		0			0
	0			0		0			0		0			0		0			0		0			0
	0			0		0			0		0			0		0			0		0			0
	0			0		0			0		0			0		0			0		0			0
	0			0		0			0		0			0		0			0		0			0
	0			0		0			0		0			0		0			0		0			0
	0			0		0			0		0			0		0			0		0			0
	0			0		0			0		0			0		0			0		0			0
	0			0		0			0		0			0		0			0		0			0
	0			0		0			0		0			0		0			0		0			0
	0			0		0			0		0			0		0			0		0			0
	0			0		0			0		0			0		0			0		0			0
	0			0		0			0		0			0		0			0		0			0
	0			0		0			0		0			0		0			0		0			0
	0			0		0			0		0			0		0			0		0			0
	0			0		0			0		0			0		0			0		0			0
	0			0		0			0		0			0		0			0		0			0
	0			0		0			0		0			0		0			0		0			0
	0			0		0			0		0			0		0			0		0			0
	0			0		0			0		0			0		0			0		0			0
	0			0		0			0		0			0		0			0		0			0
	0			0		0			0		0			0		0			0		0			0
	0			0		0			0		0			0		0			0		0			0
	0			0		0			0		0			0		0			0		0			0
	0			0		0			0		0			0		0			0		0			0
	0			0		0			0		0			0		0			0		0			0
	0			0		0			0		0			0		0			0		0			0
	0			0		0			0		0			0		0			0		0			0
	0			0		0			0		0			0		0			0		0			0
	0			0		0			0		0			0		0			0		0			0
	0			0		0			0		0			0		0			0		0			0
	0			0		0			0		0			0		0			0		0			0
	0			0		0			0		0			0		0			0		0			0
	0			0		0			0		0			0		0			0		0			0
	0			0		0			0		0			0		0			0		0			0
	0			0		0			0		0			0		0			0		0			0
	0			0		0			0		0			0		0			0		0			0
	0			0		0			0		0			0		0			0		0			0
	0			0		0			0		0			0		0			0		0			0
	0			0		0			0		0			0		0			0		0			0
	0			0		0			0		0			0		0			0		0			0
	0			0		0			0		0			0		0			0		0			0
	0			0		0			0		0			0		0			0		0			0
	0			0		0			0		0			0		0			0		0			0
	0			0		0			0		0			0		0			0		0			0
	0			0		0			0		0			0		0			0		0			0
	0			0		0			0		0			0		0			0		0			0
	0			0		0			0		0			0		0			0		0			0
	0			0		0			0		0			0		0			0		0			0
	0			0		0			0		0			0		0			0		0			0
	0			0		0			0		0			0		0			0		0			0
	0			0		0			0		0			0		0			0		0			0
	0			0		0			0		0			0		0			0		0			0
	0			0		0			0		0			0		0			0		0			0
	0			0		0			0		0			0		0			0		0			0
	0			0		0			0		0			0		0			0		0			0
	0			0		0			0		0			0		0			0		0			0
	0			0		0			0		0			0		0			0		0			0
	0			0		0			0		0			0		0			0		0			0
	0			0		0			0		0			0		0			0		0			0
	0			0		0			0		0			0		0			0		0			0
	0			0		0			0		0			0		0			0		0			0
	0			0		0			0		0			0		0			0		0			0
	0			0		0			0		0			0		0			0		0			0
	0			0		0			0		0			0		0			0		0			0
	0			0		0			0		0			0		0			0		0			0
	0			0		0			0		0			0		0			0		0			0
	0			0		0			0		0			0		0			0		0			0
	0			0		0			0		0			0		0			0		0			0
	0			0		0			0		0			0		0			0		0			0
	0			0		0			0		0			0		0			0		0			0
	0			0		0			0		0			0		0			0		0			0
	0			0		0			0		0			0		0			0		0			0
	0			0		0			0		0			0		0			0		0			0
	0			0		0			0		0			0		0			0		0			0
	0			0		0			0		0			0		0			0		0			0
	0			0		0			0		0			0		0			0		0			0
	0			0		0			0		0			0		0			0		0			0
	0			0		0			0		0			0		0			0		0			0
	0			0		0			0		0			0		0			0		0			0
	0			0		0			0		0			0		0			0		0			0
	0			0		0			0		0			0		0			0		0			0
	0			0		0			0		0			0		0			0		0			0
	0			0		0			0		0			0		0			0		0			0
	0			0		0			0		0			0		0			0		0			0
	0			0		0			0		0			0		0			0		0			0
	0			0		0			0		0			0		0			0		0			0
	0			0		0			0		0			0		0			0		0			0
	0			0		0			0		0			0		0			0		0			0
	0			0		0			0		0			0		0			0		0			0
	0			0		0			0		0			0		0			0		0			0
	0			0		0			0		0			0		0			0		0			0
	0			0		0			0		0			0		0			0		0			0
	0			0		0			0		0			0		0			0		0			0
	0			0		0			0		0			0		0			0		0			0
	0			0		0			0		0			0		0			0		0			0
	0			0		0			0		0			0		0			0		0			0
	0			0		0			0		0			0		0			0		0			0
	0			0		0			0		0			0		0			0		0			0
	0			0		0			0		0			0		0			0		0			0
	0			0		0			0		0			0		0			0		0			0
	0			0		0			0		0			0		0			0		0			0
	0			0		0			0		0			0		0			0		0			0
	0			0		0			0		0			0		0			0		0			0
	0			0		0			0		0			0		0			0		0			0
	0			0		0			0		0			0		0			0		0			0
	0			0		0			0		0			0		0			0		0			0
	0			0		0			0		0			0		0			0		0			0
	0			0		0			0		0			0		0			0		0			0
	0			0		0			0		0			0		0			0		0			0
	0			0		0			0		0			0		0			0		0			0
	0			0		0			0		0			0		0			0		0			0
	0			0		0			0		0			0		0			0		0			0
	0			0		0			0		0			0		0			0		0			0
	0			0		0			0		0			0		0			0		0			0
	0			0		0			0		0			0		0			0		0			0
	0			0		0			0		0			0		0			0		0			0
	0			0		0			0		0			0		0			0		0			0
	0			0		0			0		0			0		0			0		0			0
	0			0		0			0		0			0		0			0		0			0
	0			0		0			0		0			0		0			0		0			0
	0			0		0			0		0			0		0			0		0			0
	0			0		0			0		0			0		0			0		0			0
	0			0		0			0		0			0		0			0		0			0
	0			0		0			0		0			0		0			0		0			0
	0			0		0			0		0			0		0			0		0			0
	0			0		0			0		0			0		0			0		0			0
	0			0		0			0		0			0		0			0		0			0
	0			0		0			0		0			0		0			0		0			0
	0			0		0			0		0			0		0			0		0			0
	0			0		0			0		0			0		0			0		0			0
	0			0		0			0		0			0		0			0		0			0
	0			0		0			0		0			0		0			0		0			0
	0			0		0			0		0			0		0			0		0			0
	0			0		0			0		0			0		0			0		0			0
	0			0		0			0		0			0		0			0		0			0
	0			0		0			0		0			0		0			0		0			0
	0			0		0			0		0			0		0			0		0			0
	0			0		0			0		0			0		0			0		0			0
	0			0		0			0		0			0		0			0		0			0
	0			0		0			0		0			0		0			0		0			0
	0			0		0			0		0			0		0			0		0			0
	0			0		0			0		0			0		0			0		0			0
	0			0		0			0		0			0		0			0		0			0
	0			0		0			0		0			0		0			0		0			0
	0			0		0			0		0			0		0			0		0			0
	0			0		0			0		0			0		0			0		0			0
	0			0		0			0		0			0		0			0		0			0
	0			0		0			0		0			0		0			0		0			0
	0			0		0			0		0			0		0			0		0			0
	0			0		0			0		0			0		0			0		0			0
	0			0		0			0		0			0		0			0		0			0
	0			0		0			0		0			0		0			0		0			0
	0			0		0			0		0			0		0			0		0			0
	0			0		0			0		0			0		0			0		0			0
	0			0		0			0		0			0		0			0		0			0
	0			0		0			0		0			0		0			0		0			0
	0			0		0			0		0			0		0			0		0			0
	0			0		0			0		0			0		0			0		0			0
	0			0		0			0		0			0		0			0		0			0
	0			0		0			0		0			0		0			0		0			0
	0			0		0			0		0			0		0			0		0			0
	0			0		0			0		0			0		0			0		0			0
	0			0		0			0		0			0		0			0		0			0
	0			0		0			0		0			0		0			0		0			0
	0			0		0			0		0			0		0			0		0			0
	0			0		0			0		0			0		0			0		0			0
	0			0		0			0		0			0		0			0		0			0
	0			0		0			0		0			0		0			0		0			0
	0			0		0			0		0			0		0			0		0			0
	0			0		0			0		0			0		0			0		0			0
	0			0		0			0		0			0		0			0		0			0
	0			0		0			0		0			0		0			0		0			0
	0			0		0			0		0			0		0			0		0			0
	0			0		0			0		0			0		0			0		0			0
	0			0		0			0		0			0		0			0		0			0
	0			0		0			0		0			0		0			0		0			0
	0			0		0			0		0			0		0			0		0			0
	0			0		0			0		0			0		0			0		0			0
	0			0		0			0		0			0		0			0		0			0
	0			0		0			0		0			0		0			0		0			0
	0			0		0			0		0			0		0			0		0			0
	0			0		0			0		0			0		0			0		0			0
	0			0		0			0		0			0		0			0		0			0
	0			0		0			0		0			0		0			0		0			0
	0			0		0			0		0			0		0			0		0			0
	0			0		0			0		0			0		0			0		0			0
	0			0		0			0		0			0		0			0		0			0
	0			0		0			0		0			0		0			0		0			0
	0			0		0			0		0			0		0			0		0			0
	0			0		0			0		0			0		0			0		0			0
	0			0		0			0		0			0		0			0		0			0
	0			0		0			0		0			0		0			0		0			0
	0			0		0			0		0			0		0			0		0			0
	0			0		0			0		0			0		0			0		0			0
	0			0		0			0		0			0		0			0		0			0
	0			0		0			0		0			0		0			0		0			0
	0			0		0			0		0			0		0			0		0			0
	0			0		0			0		0			0		0			0		0			0
	0			0		0			0		0			0		0			0		0			0
	0			0		0			0		0			0		0			0		0			0
	0			0		0			0		0			0		0			0		0			0
	0			0		0			0		0			0		0			0		0			0
	0			0		0			0		0			0		0			0		0			0
	0			0		0			0		0			0		0			0		0			0
	0			0		0			0		0			0		0			0		0			0
	0			0		0			0		0			0		0			0		0			0
	0			0		0			0		0			0		0			0		0			0
	0			0		0			0		0			0		0			0		0			0
	0			0		0			0		0			0		0			0		0			0
	0			0		0			0		0			0		0			0		0			0
	0			0		0			0		0			0		0			0		0			0
	0			0		0			0		0			0		0			0		0			0
	0			0		0			0		0			0		0			0		0			0
	0			0		0			0		0			0		0			0		0			0
	0			0		0			0		0			0		0			0		0			0
	0			0		0			0		0			0		0			0		0			0
	0			0		0			0		0			0		0			0		0			0
	0			0		0			0		0			0		0			0		0			0
	0			0		0			0		0			0		0			0		0			0
	0			0		0			0		0			0		0			0		0			0
	0			0		0			0		0			0		0			0		0			0
	0			0		0			0		0			0		0			0		0			0
	0			0		0			0		0			0		0			0		0			0
	0			0		0			0		0			0		0			0		0			0
	0			0		0			0		0			0		0			0		0			0
	0			0		0			0		0			0		0			0		0			0
	0			0		0			0		0			0		0			0		0			0
	0			0		0			0		0			0		0			0		0			0
	0			0		0			0		0			0		0			0		0			0
	0			0		0			0		0			0		0			0		0			0
	0			0		0			0		0			0		0			0		0			0
	0			0		0			0		0			0		0			0		0			0
	0			0		0			0		0			0		0			0		0			0
	0			0		0			0		0			0		0			0		0			0
	0			0		0			0		0			0		0			0		0			0
	0			0		0			0		0			0		0			0		0			0
	0			0		0			0		0			0		0			0		0			0
	0			0		0			0		0			0		0			0		0			0
	0			0		0			0		0			0		0			0		0			0
	0			0		0			0		0			0		0			0		0			0
	0			0		0			0		0			0		0			0		0			0
	0			0		0			0		0			0		0			0		0			0
	0			0		0			0		0			0		0			0		0			0
	0			0		0			0		0			0		0			0		0			0
	0			0		0			0		0			0		0			0		0			0
	0			0		0			0		0			0		0			0		0			0
	0			0		0			0		0			0		0			0		0			0
	0			0		0			0		0			0		0			0		0			0
	0			0		0			0		0			0		0			0		0			0
	0			0		0			0		0			0		0			0		0			0
	0			0		0			0		0			0		0			0		0			0
	0			0		0			0		0			0		0			0		0			0
	0			0		0			0		0			0		0			0		0			0
	0			0		0			0		0			0		0			0		0			0
	0			0		0			0		0			0		0			0		0			0
	0			0		0			0		0			0		0			0		0			0
	0			0		0			0		0			0		0			0		0			0
	0			0		0			0		0			0		0			0		0			0
	0			0		0			0		0			0		0			0		0			0
	0			0		0			0		0			0		0			0		0			0
	0			0		0			0		0			0		0			0		0			0
	0			0		0			0		0			0		0			0		0			0
	0			0		0			0		0			0		0			0		0			0
	0			0		0			0		0			0		0			0		0			0
	0			0		0			0		0			0		0			0		0			0
	0			0		0			0		0			0		0			0		0			0
	0			0		0			0		0			0		0			0		0			0
	0			0		0			0		0			0		0			0		0			0
	0			0		0			0		0			0		0			0		0			0
	0			0		0			0		0			0		0			0		0			0
	0			0		0			0		0			0		0			0		0			0
	0			0		0			0		0			0		0			0		0			0
	0			0		0			0		0			0		0			0		0			0
	0			0		0			0		0			0		0			0		0			0
	0			0		0			0		0			0		0			0		0			0
	0			0		0			0		0			0		0			0		0			0
	0			0		0			0		0			0		0			0		0			0
	0			0		0			0		0			0		0			0		0			0
	0			0		0			0		0			0		0			0		0			0
	0			0		0			0		0			0		0			0		0			0
	0			0		0			0		0			0		0			0		0			0
	0			0		0			0		0			0		0			0		0			0
	0			0		0			0		0			0		0			0		0			0
	0			0		0			0		0			0		0			0		0			0
	0			0		0			0		0			0		0			0		0			0
	0			0		0			0		0			0		0			0		0			0
	0			0		0			0		0			0		0			0		0			0
	0			0		0			0		0			0		0			0		0			0
	0			0		0			0		0			0		0			0		0			0
	0			0		0			0		0			0		0			0		0			0
	0			0		0			0		0			0		0			0		0			0
	0			0		0			0		0			0		0			0		0			0
	0			0		0			0		0			0		0			0		0			0
	0			0		0			0		0			0		0			0		0			0
	0			0		0			0		0			0		0			0		0			0
	0			0		0			0		0			0		0			0		0			0
	0			0		0			0		0			0		0			0		0			0
	0			0		0			0		0			0		0			0		0			0
	0			0		0			0		0			0		0			0		0			0
	0			0		0			0		0			0		0			0		0			0
	0			0		0			0		0			0		0			0		0			0
	0			0		0			0		0			0		0			0		0			0
	0			0		0			0		0			0		0			0		0			0
	0			0		0			0		0			0		0			0		0			0
	0			0		0			0		0			0		0			0		0			0
	0			0		0			0		0			0		0			0		0			0
	0			0		0			0		0			0		0			0		0			0
	0			0		0			0		0			0		0			0		0			0
	0			0		0			0		0			0		0			0		0			0
	0			0		0			0		0			0		0			0		0			0
	0			0		0			0		0			0		0			0		0			0
	0			0		0			0		0			0		0			0		0			0
	0			0		0			0		0			0		0			0		0			0
	0			0		0			0		0			0		0			0		0			0
	0			0		0			0		0			0		0			0		0			0
	0			0		0			0		0			0		0			0		0			0
	0			0		0			0		0			0		0			0		0			0
	0			0		0			0		0			0		0			0		0			0
	0			0		0			0		0			0		0			0		0			0
	0			0		0			0		0			0		0			0		0			0
	0			0		0			0		0			0		0			0		0			0
	0			0		0			0		0			0		0			0		0			0
	0			0		0			0		0			0		0			0		0			0
	0			0		0			0		0			0		0			0		0			0
	0			0		0			0		0			0		0			0		0			0
	0			0		0			0		0			0		0			0		0			0
	0			0		0			0		0			0		0			0		0			0
	0			0		0			0		0			0		0			0		0			0
	0			0		0			0		0			0		0			0		0			0
	0			0		0			0		0			0		0			0		0			0
	0			0		0			0		0			0		0			0		0			0
	0			0		0			0		0			0		0			0		0			0
	0			0		0			0		0			0		0			0		0			0
	0			0		0			0		0			0		0			0		0			0
	0			0		0			0		0			0		0			0		0			0
	0			0		0			0		0			0		0			0		0			0
	0			0		0			0		0			0		0			0		0			0
	0			0		0			0		0			0		0			0		0			0
	0			0		0			0		0			0		0			0		0			0
	0			0		0			0		0			0		0			0		0			0
	0			0		0			0		0			0		0			0		0			0
	0			0		0			0		0			0		0			0		0			0
	0			0		0			0		0			0		0			0		0			0
	0			0		0			0		0			0		0			0		0			0
	0			0		0			0		0			0		0			0		0			0
	0			0		0			0		0			0		0			0		0			0
	0			0		0			0		0			0		0			0		0			0
	0			0		0			0		0			0		0			0		0			0
	0			0		0			0		0			0		0			0		0			0
	0			0		0			0		0			0		0			0		0			0
	0			0		0			0		0			0		0			0		0			0
	0			0		0			0		0			0		0			0		0			0
	0			0		0			0		0			0		0			0		0			0
	0			0		0			0		0			0		0			0		0			0
	0			0		0			0		0			0		0			0		0			0
	0			0		0			0		0			0		0			0		0			0
	0			0		0			0		0			0		0			0		0			0
	0			0		0			0		0			0		0			0		0			0
	0			0		0			0		0			0		0			0		0			0
	0			0		0			0		0			0		0			0		0			0
	0			0		0			0		0			0		0			0		0			0
	0			0		0			0		0			0		0			0		0			0
	0			0		0			0		0			0		0			0		0			0
	0			0		0			0		0			0		0			0		0			0
	0			0		0			0		0			0		0			0		0			0
	0			0		0			0		0			0		0			0		0			0
	0			0		0			0		0			0		0			0		0			0
	0			0		0			0		0			0		0			0		0			0
	0			0		0			0		0			0		0			0		0			0
	0			0		0			0		0			0		0			0		0			0
	0			0		0			0		0			0		0			0		0			0
	0			0		0			0		0			0		0			0		0			0
	0			0		0			0		0			0		0			0		0			0
	0			0		0			0		0			0		0			0		0			0
	0			0		0			0		0			0		0			0		0			0
	0			0		0			0		0			0		0			0		0			0
	0			0		0			0		0			0		0			0		0			0
	0			0		0			0		0			0		0			0		0			0
	0			0		0			0		0			0		0			0		0			0
	0			0		0			0		0			0		0			0		0			0
	0			0		0			0		0			0		0			0		0			0
	0			0		0			0		0			0		0			0		0			0
	0			0		0			0		0			0		0			0		0			0
	0			0		0			0		0			0		0			0		0			0
	0			0		0			0		0			0		0			0		0			0
	0			0		0			0		0			0		0			0		0			0
	0			0		0			0		0			0		0			0		0			0
	0			0		0			0		0			0		0			0		0			0
	0			0		0			0		0			0		0			0		0			0
	0			0		0			0		0			0		0			0		0			0
	0			0		0			0		0			0		0			0		0			0
	0			0		0			0		0			0		0			0		0			0
	0			0		0			0		0			0		0			0		0			0
	0			0		0			0		0			0		0			0		0			0
	0			0		0			0		0			0		0			0		0			0
	0			0		0			0		0			0		0			0		0			0
	0			0		0			0		0			0		0			0		0			0
	0			0		0			0		0			0		0			0		0			0
	0			0		0			0		0			0		0			0		0			0
	0			0		0			0		0			0		0			0		0			0
	0			0		0			0		0			0		0			0		0			0
	0			0		0			0		0			0		0			0		0			0
	0			0		0			0		0			0		0			0		0			0
	0			0		0			0		0			0		0			0		0			0
	0			0		0			0		0			0		0			0		0			0
	0			0		0			0		0			0		0			0		0			0
	0			0		0			0		0			0		0			0		0			0
	0			0		0			0		0			0		0			0		0			0
	0			0		0			0		0			0		0			0		0			0
	0			0		0			0		0			0		0			0		0			0
	0			0		0			0		0			0		0			0		0			0
	0			0		0			0		0			0		0			0		0			0
	0			0		0			0		0			0		0			0		0			0
	0			0		0			0		0			0		0			0		0			0
	0			0		0			0		0			0		0			0		0			0
	0			0		0			0		0			0		0			0		0			0
	0			0		0			0		0			0		0			0		0			0
	0			0		0			0		0			0		0			0		0			0
	0			0		0			0		0			0		0			0		0			0
	0			0		0			0		0			0		0			0		0			0
	0			0		0			0		0			0		0			0		0			0
	0			0		0			0		0			0		0			0		0			0
	0			0		0			0		0			0		0			0		0			0
	0			0		0			0		0			0		0			0		0			0
	0			0		0			0		0			0		0			0		0			0
	0			0		0			0		0			0		0			0		0			0
	0			0		0			0		0			0		0			0		0			0
	0			0		0			0		0			0		0			0		0			0
	0			0		0			0		0			0		0			0		0			0
	0			0		0			0		0			0		0			0		0			0
	0			0		0			0		0			0		0			0		0			0
	0			0		0			0		0			0		0			0		0			0
	0			0		0			0		0			0		0			0		0			0
	0			0		0			0		0			0		0			0		0			0
	0			0		0			0		0			0		0			0		0			0
	0			0		0			0		0			0		0			0		0			0
	0			0		0			0		0			0		0			0		0			0
	0			0		0			0		0			0		0			0		0			0
	0			0		0			0		0			0		0			0		0			0
	0			0		0			0		0			0		0			0		0			0
	0			0		0			0		0			0		0			0		0			0
	0			0		0			0		0			0		0			0		0			0
	0			0		0			0		0			0		0			0		0			0
	0			0		0			0		0			0		0			0		0			0
	0			0		0			0		0			0		0			0		0			0
	0			0		0			0		0			0		0			0		0			0
	0			0		0			0		0			0		0			0		0			0
	0			0		0			0		0			0		0			0		0			0
	0			0		0			0		0			0		0			0		0			0
	0			0		0			0		0			0		0			0		0			0
	0			0		0			0		0			0		0			0		0			0
	0			0		0			0		0			0		0			0		0			0

## Sheet: raw data prim T cell LFA-1
		2019-03-14 prim T cell LFA-1 cell1-1 spot1					2019-03-14 prim T cell LFA-1 cell1-1 spot2					2019-03-14 prim T cell LFA-1 cell1-1 spot3					2019-03-14 prim T cell LFA-1 cell1-1 spot4					2019-03-14 prim T cell LFA-1 cell1-1 spot5
		Average	151.513				Average	163.602				Average	231.386				Average	203.652				Average	131.011
		StDev	74.9951				StDev	78.0426				StDev	85.2826				StDev	139.742				StDev	70.8761
				setp					setp					setp					setp					setp
		kPa	%				kPa	%				kPa	%				kPa	%				kPa	%
	0	0	1.38889	318.836		0	0	1.38889	371.746		0	0	0.740741	396.587		0	0	4.16667	1728.09		0	0	0.740741	127.14
	0	0.659469	0	0		0	0.628066	0	0		0	0.989203	0	0		0	0.9578	0	0		0	0.76938	0	0
	0	1.31894	0	0		0	1.25613	0	0		0	1.97841	0	0		0	1.9156	0	0		0	1.53876	0	0
	0	1.97841	0	0		0	1.8842	0	0		0	2.96761	0	0		0	2.8734	0	0		0	2.30814	0	0
	0	2.63788	0	0		0	2.51226	0	0		0	3.95681	0	0		0	3.8312	0	0		0	3.07752	0	0
	0	3.29734	0	0		0	3.14033	0	0		0	4.94602	0	0		0	4.789	0	0		0	3.8469	0	0
	0	3.95681	0	0		0	3.76839	0	0		0	5.93522	0	0		0	5.7468	0	0		0	4.61628	0	0
	0	4.61628	0	0		0	4.39646	0	0		0	6.92442	0	0		0	6.7046	0	0		0	5.38566	0	0
	0	5.27575	0	0		0	5.02452	0	0		0	7.91363	0	0		0	7.6624	0	0		0	6.15504	0	0
	0	5.93522	0	0		0	5.65259	0	0		0	8.90283	0	0		0	8.6202	0	0		0	6.92442	0	0
	0	6.59469	0	0		0	6.28066	0	0		0	9.89203	0	0		0	9.578	0	0		0	7.6938	0	0
	0	7.25416	0	0		0	6.90872	0	0		0	10.8812	0	0		0	10.5358	0	0		0	8.46318	0	0
	0	7.91363	0	0		0	7.53679	0	0		0	11.8704	0	0		0	11.4936	0	0		0	9.23256	0	0
	0	8.5731	0	0		0	8.16485	0	0		0	12.8596	0	0		0	12.4514	0	0		0	10.0019	0	0
	0	9.23256	0	0		0	8.79292	0	0		0	13.8489	0	0		0	13.4092	0	0		0	10.7713	0	0
	0	9.89203	0	0		0	9.42098	0	0		0	14.8381	0	0		0	14.367	0	0		0	11.5407	0	0
	0	10.5515	0	0		0	10.049	0	0		0	15.8272	0	0		0	15.3248	0	0		0	12.3101	0	0
	0	11.211	0	0		0	10.6771	0	0		0	16.8165	0	0		0.678442	16.2826	4.16667	1462.81		0	13.0795	0	0
	0	11.8704	0	0		0	11.3052	0	0		0	17.8057	0	0		0	17.2404	0	0		0	13.8489	0	0
	0	12.5299	0	0		0	11.9332	0	0		0	18.7949	0	0		0	18.1982	0	0		0	14.6182	0	0
	0	13.1894	0	0		0	12.5613	0	0		0	19.7841	0	0		0	19.156	0	0		0	15.3876	0	0
	0	13.8489	0	0		0	13.1894	0	0		0	20.7733	0	0		0	20.1138	0	0		0.119681	16.157	0.740741	97.7148
	0	14.5083	0	0		0	13.8174	0	0		0	21.7625	0	0		0	21.0716	0	0		0	16.9264	0	0
	0	15.1678	0	0		0	14.4455	0	0		0	22.7517	0	0		0	22.0294	0	0		0	17.6958	0	0
	0.659469	15.8272	4.16667	767.109		0	15.0736	0	0		0	23.7409	0	0		0	22.9872	0	0		0	18.4651	0	0
	0	16.4867	0	0		0	15.7016	0	0		0	24.7301	0	0		0	23.945	0	0		0	19.2345	0	0
	0	17.1462	0	0		0.226801	16.3297	1.38889	301.239		0	25.7193	0	0		0	24.9028	0	0		0	20.0039	0	0
	0	17.8057	0	0		0	16.9578	0	0		0	26.7085	0	0		0	25.8606	0	0		0	20.7733	0	0
	0	18.4651	0	0		0	17.5858	0	0		0	27.6977	0	0		0	26.8184	0	0		0	21.5426	0	0
	0	19.1246	0	0		0	18.2139	0	0		0	28.6869	0	0		0	27.7762	0	0		0	22.312	0	0
	0	19.7841	0	0		0	18.842	0	0		0	29.6761	0	0		0	28.734	0	0		0	23.0814	0	0
	0	20.4435	0	0		0	19.47	0	0		0	30.6653	0	0		0	29.6918	0	0		0.353345	23.8508	1.48148	170.124
	0	21.103	0	0		0	20.0981	0	0		0	31.6545	0	0		0	30.6496	0	0		0	24.6202	0	0
	0	21.7625	0	0		0	20.7262	0	0		0	32.6437	0	0		0	31.6074	0	0		0	25.3895	0	0
	0	22.4219	0	0		0	21.3542	0	0		0	33.6329	0	0		0	32.5652	0	0		0	26.1589	0	0
	0	23.0814	0	0		0	21.9823	0	0		0	34.6221	0	0		0	33.523	0	0		0	26.9283	0	0
	0	23.7409	0	0		0	22.6104	0	0		0	35.6113	0	0		0	34.4808	0	0		0	27.6977	0	0
	0.338894	24.4003	1.38889	224.411		0	23.2384	0	0		0	36.6005	0	0		0	35.4386	0	0		0	28.4671	0	0
	0	25.0598	0	0		0.331479	23.8665	1.38889	271.196		0	37.5897	0	0		0	36.3964	0	0		0	29.2365	0	0
	0	25.7193	0	0		0	24.4946	0	0		0	38.5789	0	0		0	37.3542	0	0		0	30.0058	0	0
	0	26.3788	0	0		0	25.1226	0	0		0	39.5681	0	0		0	38.312	0	0		0	30.7752	0	0
	0	27.0382	0	0		0	25.7507	0	0		0.300425	40.5573	0.740741	269.744		0	39.2698	0	0		0	31.5446	0	0
	0	27.6977	0	0		0	26.3788	0	0		0	41.5465	0	0		0	40.2276	0	0		0.718088	32.314	2.22222	216.47
	0	28.3572	0	0		0	27.0068	0	0		0	42.5357	0	0		0	41.1854	0	0		0	33.0834	0	0
	0	29.0166	0	0		0	27.6349	0	0		0	43.5249	0	0		0	42.1432	0	0		0	33.8527	0	0
	0	29.6761	0	0		0	28.263	0	0		0	44.5141	0	0		0	43.101	0	0		0	34.6221	0	0
	0	30.3356	0	0		0	28.891	0	0		0	45.5033	0	0		0	44.0588	0	0		0	35.3915	0	0
	0	30.995	0	0		0	29.5191	0	0		0	46.4926	0	0		0	45.0166	0	0		0	36.1609	0	0
	0	31.6545	0	0		0	30.1471	0	0		0	47.4818	0	0		0	45.9744	0	0		0	36.9303	0	0
	0.448805	32.314	1.38889	197.339		0	30.7752	0	0		0	48.471	0	0		0	46.9322	0	0		0	37.6996	0	0
	0	32.9734	0	0		0	31.4033	0	0		0	49.4602	0	0		1.99542	47.89	4.16667	1010.91		0	38.469	0	0
	0	33.6329	0	0		0.44488	32.0313	1.38889	240.43		0	50.4494	0	0		0	48.8478	0	0		0	39.2384	0	0
	0	34.2924	0	0		0	32.6594	0	0		0	51.4386	0	0		0	49.8056	0	0		1.18542	40.0078	2.96296	245.381
	0	34.9519	0	0		0	33.2875	0	0		0	52.4278	0	0		0	50.7634	0	0		0	40.7772	0	0
	0	35.6113	0	0		0	33.9155	0	0		0	53.417	0	0		0	51.7212	0	0		0	41.5465	0	0
	0	36.2708	0	0		0	34.5436	0	0		0	54.4062	0	0		0	52.679	0	0		0	42.3159	0	0
	0	36.9303	0	0		0	35.1717	0	0		0	55.3954	0	0		0	53.6368	0	0		0	43.0853	0	0
	0	37.5897	0	0		0	35.7997	0	0		0	56.3846	0	0		0	54.5946	0	0		0	43.8547	0	0
	0	38.2492	0	0		0	36.4278	0	0		0	57.3738	0	0		0	55.5524	0	0		0	44.6241	0	0
	0	38.9087	0	0		0	37.0559	0	0		0	58.363	0	0		2.35459	56.5102	4.16667	902.116		0	45.3934	0	0
	0	39.5681	0	0		0	37.6839	0	0		0	59.3522	0	0		0	57.468	0	0		0	46.1628	0	0
	0	40.2276	0	0		0	38.312	0	0		0	60.3414	0	0		0	58.4258	0	0		0	46.9322	0	0
	0	40.8871	0	0		0	38.9401	0	0		0	61.3306	0	0		0	59.3836	0	0		0	47.7016	0	0
	0	41.5465	0	0		0	39.5681	0	0		0	62.3198	0	0		0	60.3414	0	0		2.15427	48.471	4.44444	302.795
	0	42.206	0	0		0.558281	40.1962	1.38889	211.515		0	63.309	0	0		0	61.2992	0	0		0	49.2403	0	0
	0	42.8655	0	0		0	40.8243	0	0		0.476283	64.2982	0.740741	206.802		0	62.257	0	0		0	50.0097	0	0
	0	43.5249	0	0		0	41.4523	0	0		0	65.2874	0	0		0	63.2148	0	0		0	50.7791	0	0
	0	44.1844	0	0		0	42.0804	0	0		0	66.2766	0	0		2.67386	64.1726	4.16667	810.607		0	51.5485	0	0
	0	44.8439	0	0		0	42.7085	0	0		0	67.2658	0	0		0	65.1304	0	0		0	52.3179	0	0
	0	45.5033	0	0		0	43.3365	0	0		0	68.255	0	0		0	66.0882	0	0		0	53.0872	0	0
	0	46.1628	0	0		0	43.9646	0	0		0	69.2442	0	0		0	67.046	0	0		0	53.8566	0	0
	0	46.8223	0	0		0	44.5927	0	0		0	70.2334	0	0		0	68.0038	0	0		0	54.626	0	0
	0	47.4818	0	0		0	45.2207	0	0		0	71.2226	0	0		0	68.9616	0	0		0	55.3954	0	0
	1.33726	48.1412	2.77778	296.826		0	45.8488	0	0		0.534902	72.2118	0.740741	187.676		0	69.9194	0	0		1.24811	56.1648	2.22222	124.489
	0	48.8007	0	0		0	46.4768	0	0		0	73.201	0	0		0	70.8772	0	0		0	56.9341	0	0
	0	49.4602	0	0		0	47.1049	0	0		0	74.1902	0	0		2.99313	71.835	4.16667	723.991		0	57.7035	0	0
	0	50.1196	0	0		0	47.733	0	0		0	75.1795	0	0		0	72.7928	0	0		0	58.4729	0	0
	0	50.7791	0	0		0	48.361	0	0		0	76.1687	0	0		0	73.7506	0	0		0	59.2423	0	0
	0	51.4386	0	0		0	48.9891	0	0		0	77.1578	0	0		0	74.7084	0	0		0	60.0117	0	0
	0	52.098	0	0		0	49.6172	0	0		0	78.1471	0	0		0	75.6662	0	0		0	60.7811	0	0
	0	52.7575	0	0		0	50.2452	0	0		0	79.1363	0	0		0	76.624	0	0		0	61.5504	0	0
	0	53.417	0	0		0	50.8733	0	0		1.18704	80.1255	1.48148	338.957		0	77.5818	0	0		0	62.3198	0	0
	0	54.0765	0	0		0	51.5014	0	0		0	81.1147	0	0		0	78.5396	0	0		0	63.0892	0	0
	0	54.7359	0	0		0	52.1294	0	0		0	82.1039	0	0		0	79.4974	0	0		1.41908	63.8586	2.22222	100.211
	0	55.3954	0	0		0	52.7575	0	0		0	83.0931	0	0		3.3523	80.4552	4.16667	632.396		0	64.6279	0	0
	0	56.0549	0	0		0	53.3856	0	0		0	84.0823	0	0		0	81.413	0	0		0	65.3973	0	0
	0	56.7143	0	0		0	54.0136	0	0		0	85.0715	0	0		0	82.3708	0	0		0	66.1667	0	0
	0	57.3738	0	0		0	54.6417	0	0		0	86.0607	0	0		0	83.3286	0	0		0	66.9361	0	0
	0	58.0333	0	0		0	55.2698	0	0		0	87.0499	0	0		0	84.2864	0	0		0	67.7055	0	0
	0	58.6927	0	0		0.776359	55.8978	1.38889	161.115		0	88.0391	0	0		0	85.2442	0	0		0	68.4748	0	0
	0	59.3522	0	0		0	56.5259	0	0		0	89.0283	0	0		0	86.202	0	0		0	69.2442	0	0
	0	60.0117	0	0		0	57.154	0	0		0	90.0175	0	0		0	87.1598	0	0		0	70.0136	0	0
	0	60.6711	0	0		0	57.782	0	0		0	91.0067	0	0		0	88.1176	0	0		0	70.783	0	0
	0	61.3306	0	0		0	58.4101	0	0		0	91.9959	0	0		0	89.0754	0	0		0	71.5524	0	0
	0	61.9901	0	0		0	59.0382	0	0		0	92.9851	0	0		0	90.0332	0	0		2.67858	72.3217	3.7037	127.572
	0	62.6495	0	0		0	59.6662	0	0		0	93.9743	0	0		0	90.991	0	0		0	73.0911	0	0
	0	63.309	0	0		0	60.2943	0	0		0	94.9635	0	0		0	91.9488	0	0		0	73.8605	0	0
	0	63.9685	0	0		0	60.9224	0	0		0	95.9527	0	0		0	92.9066	0	0		0	74.6299	0	0
	0	64.6279	0	0		0	61.5504	0	0		0	96.9419	0	0		0	93.8644	0	0		0	75.3993	0	0
	0	65.2874	0	0		0	62.1785	0	0		0	97.9311	0	0		0	94.8222	0	0		0	76.1687	0	0
	0	65.9469	0	0		0	62.8066	0	0		0	98.9203	0	0		0	95.78	0	0		0	76.938	0	0
	0	66.6064	0	0		0	63.4346	0	0		0	99.9095	0	0		0	96.7378	0	0		0	77.7074	0	0
	0	67.2658	0	0		0.88976	64.0627	1.38889	137.613		0	100.899	0	0		0	97.6956	0	0		0	78.4768	0	0
	0	67.9253	0	0		0	64.6907	0	0		0	101.888	0	0		0	98.6534	0	0		0	79.2462	0	0
	0	68.5848	0	0		0	65.3188	0	0		0	102.877	0	0		0	99.6112	0	0		1.77812	80.0156	2.22222	57.7902
	0	69.2442	0	0		0	65.9469	0	0		0.76938	103.866	0.740741	120.453		0	100.569	0	0		0	80.7849	0	0
	0	69.9037	0	0		0	66.575	0	0		0	104.856	0	0		0	101.527	0	0		0	81.5543	0	0
	0	70.5632	0	0		0	67.203	0	0		0	105.845	0	0		0	102.485	0	0		0	82.3237	0	0
	0	71.2226	0	0		0	67.8311	0	0		0	106.834	0	0		0	103.442	0	0		0	83.0931	0	0
	0	71.8821	0	0		0	68.4591	0	0		0	107.823	0	0		4.35001	104.4	4.16667	410.457		0	83.8624	0	0
	4.03009	72.5416	5.55556	346.471		0	69.0872	0	0		0	108.812	0	0		0	105.358	0	0		0	84.6318	0	0
	0	73.201	0	0		0	69.7153	0	0		0	109.802	0	0		0	106.316	0	0		0	85.4012	0	0
	0	73.8605	0	0		0	70.3433	0	0		0	110.791	0	0		0	107.274	0	0		0	86.1706	0	0
	0	74.52	0	0		0	70.9714	0	0		0	111.78	0	0		0	108.231	0	0		0	86.94	0	0
	0	75.1795	0	0		0	71.5995	0	0		0.835327	112.769	0.740741	104.221		0	109.189	0	0		0	87.7094	0	0
	0	75.8389	0	0		1.00316	72.2275	1.38889	115.963		0	113.758	0	0		0	110.147	0	0		6.55398	88.4787	7.40741	134.001
	0	76.4984	0	0		0	72.8556	0	0		0	114.748	0	0		0	111.105	0	0		0	89.2481	0	0
	0	77.1578	0	0		0	73.4837	0	0		0	115.737	0	0		0	112.063	0	0		0	90.0175	0	0
	0	77.8173	0	0		0	74.1117	0	0		0	116.726	0	0		0	113.02	0	0		0	90.7869	0	0
	0	78.4768	0	0		0	74.7398	0	0		0	117.715	0	0		0	113.978	0	0		0	91.5563	0	0
	0	79.1363	0	0		0	75.3679	0	0		0	118.704	0	0		0	114.936	0	0		0	92.3256	0	0
	0	79.7957	0	0		0	75.9959	0	0		0	119.694	0	0		0	115.894	0	0		0	93.095	0	0
	2.23487	80.4552	2.77778	140.256		0	76.624	0	0		0.893947	120.683	0.740741	90.7786		0	116.852	0	0		0	93.8644	0	0
	0	81.1147	0	0		0	77.2521	0	0		0	121.672	0	0		0	117.809	0	0		0	94.6338	0	0
	0	81.7741	0	0		0	77.8801	0	0		0	122.661	0	0		0	118.767	0	0		0	95.4032	0	0
	0	82.4336	0	0		0	78.5082	0	0		0	123.65	0	0		0	119.725	0	0		7.83628	96.1726	8.14815	98.8967
	0	83.0931	0	0		0	79.1363	0	0		0	124.64	0	0		0	120.683	0	0		0	96.9419	0	0
	0	83.7525	0	0		0	79.7643	0	0		0	125.629	0	0		0	121.641	0	0		0	97.7113	0	0
	0	84.412	0	0		5.58281	80.3924	6.94444	480.826		0	126.618	0	0		0	122.598	0	0		0	98.4807	0	0
	0	85.0715	0	0		0	81.0205	0	0		0	127.607	0	0		0	123.556	0	0		0	99.2501	0	0
	0	85.731	0	0		0	81.6485	0	0		2.8577	128.596	2.22222	234.792		0	124.514	0	0		0	100.019	0	0
	0	86.3904	0	0		0	82.2766	0	0		0	129.586	0	0		0	125.472	0	0		0	100.789	0	0
	0	87.0499	0	0		0	82.9047	0	0		0	130.575	0	0		0	126.43	0	0		0	101.558	0	0
	0	87.7094	0	0		0	83.5327	0	0		0	131.564	0	0		0	127.387	0	0		0	102.328	0	0
	1.22734	88.3688	1.38889	55.3776		0	84.1608	0	0		0	132.553	0	0		5.34772	128.345	4.16667	236.298		0	103.097	0	0
	0	89.0283	0	0		0	84.7889	0	0		0	133.542	0	0		0	129.303	0	0		0	103.866	0	0
	0	89.6878	0	0		0	85.4169	0	0		0	134.532	0	0		0	130.261	0	0		3.8754	104.636	3.7037	25.7655
	0	90.3472	0	0		0	86.045	0	0		0	135.521	0	0		0	131.219	0	0		0	105.405	0	0
	0	91.0067	0	0		0	86.6731	0	0		4.04474	136.51	2.96296	266.708		0	132.176	0	0		0	106.174	0	0
	0	91.6662	0	0		0	87.3011	0	0		0	137.499	0	0		0	133.134	0	0		0	106.944	0	0
	0	92.3256	0	0		0	87.9292	0	0		0	138.488	0	0		0	134.092	0	0		0	107.713	0	0
	0	92.9851	0	0		7.37977	88.5572	8.33333	469.314		0	139.478	0	0		0	135.05	0	0		0	108.483	0	0
	0	93.6446	0	0		0	89.1853	0	0		0	140.467	0	0		0	136.008	0	0		0	109.252	0	0
	0	94.3041	0	0		0	89.8134	0	0		0	141.456	0	0		0	136.965	0	0		0	110.021	0	0
	0	94.9635	0	0		0	90.4415	0	0		0	142.445	0	0		0	137.923	0	0		0	110.791	0	0
	0	95.623	0	0		0	91.0695	0	0		0	143.435	0	0		0	138.881	0	0		0	111.56	0	0
	1.33726	96.2824	1.38889	42.3668		0	91.6976	0	0		5.34903	144.424	3.7037	280.088		0	139.839	0	0		5.82449	112.329	5.18518	18.0966
	0	96.9419	0	0		0	92.3256	0	0		0	145.413	0	0		0	140.797	0	0		0	113.099	0	0
	0	97.6014	0	0		0	92.9537	0	0		0	146.402	0	0		0	141.754	0	0		0	113.868	0	0
	0	98.2609	0	0		0	93.5818	0	0		0	147.391	0	0		0	142.712	0	0		0	114.638	0	0
	0	98.9203	0	0		0	94.2098	0	0		0	148.381	0	0		0	143.67	0	0		0	115.407	0	0
	0	99.5798	0	0		0	94.8379	0	0		0	149.37	0	0		6.02616	144.628	4.16667	145.162		0	116.176	0	0
	0	100.239	0	0		0	95.466	0	0		0	150.359	0	0		0	145.586	0	0		0	116.946	0	0
	0	100.899	0	0		0	96.094	0	0		0	151.348	0	0		0	146.543	0	0		0	117.715	0	0
	0	101.558	0	0		0	96.7221	0	0		2.25685	152.337	1.48148	92.5724		0	147.501	0	0		0	118.485	0	0
	0	102.218	0	0		0	97.3502	0	0		0	153.327	0	0		0	148.459	0	0		0	119.254	0	0
	0	102.877	0	0		0	97.9782	0	0		0	154.316	0	0		0	149.417	0	0		5.33437	120.023	4.44444	5.36596
	0	103.537	0	0		0	98.6063	0	0		0	155.305	0	0		0	150.375	0	0		0	120.793	0	0
	5.78867	104.196	5.55556	124.383		0	99.2344	0	0		0	156.294	0	0		0	151.332	0	0		0	121.562	0	0
	0	104.856	0	0		0	99.8624	0	0		0	157.283	0	0		0	152.29	0	0		0	122.332	0	0
	0	105.515	0	0		0	100.49	0	0		0	158.273	0	0		0	153.248	0	0		0	123.101	0	0
	0	106.174	0	0		0	101.119	0	0		0	159.262	0	0		0	154.206	0	0		0	123.87	0	0
	0	106.834	0	0		0	101.747	0	0		1.18704	160.251	0.740741	37.4826		0	155.164	0	0		0	124.64	0	0
	0	107.493	0	0		0	102.375	0	0		0	161.24	0	0		0	156.121	0	0		0	125.409	0	0
	0	108.153	0	0		0	103.003	0	0		0	162.229	0	0		0	157.079	0	0		0	126.178	0	0
	0	108.812	0	0		0	103.631	0	0		0	163.219	0	0		0	158.037	0	0		0	126.948	0	0
	0	109.472	0	0		4.34412	104.259	4.16667	146.735		0	164.208	0	0		0	158.995	0	0		0	127.717	0	0
	0	110.131	0	0		0	104.887	0	0		0	165.197	0	0		0	159.953	0	0		7.61401	128.487	5.92593	0.377728
	0	110.791	0	0		0	105.515	0	0		0	166.186	0	0		6.7046	160.91	4.16667	76.1194		0	129.256	0	0
	0	111.45	0	0		0	106.143	0	0		0	167.175	0	0		0	161.868	0	0		0	130.025	0	0
	3.11416	112.11	2.77778	43.1283		0	106.771	0	0		6.22832	168.165	3.7037	148.034		0	162.826	0	0		0	130.795	0	0
	0	112.769	0	0		0	107.399	0	0		0	169.154	0	0		0	163.784	0	0		0	131.564	0	0
	0	113.429	0	0		0	108.027	0	0		0	170.143	0	0		0	164.742	0	0		0	132.333	0	0
	0	114.088	0	0		0	108.655	0	0		0	171.132	0	0		0	165.699	0	0		0	133.103	0	0
	0	114.748	0	0		0	109.283	0	0		0	172.121	0	0		0	166.657	0	0		0	133.872	0	0
	0	115.407	0	0		0	109.912	0	0		0	173.111	0	0		0	167.615	0	0		0	134.642	0	0
	0	116.067	0	0		0	110.54	0	0		0	174.1	0	0		7.02387	168.573	4.16667	51.2736		0	135.411	0	0
	0	116.726	0	0		0	111.168	0	0		0	175.089	0	0		0	169.531	0	0		3.02623	136.18	2.22222	0.593766
	0	117.385	0	0		0	111.796	0	0		10.4343	176.078	5.92593	181.269		0	170.488	0	0		0	136.95	0	0
	0	118.045	0	0		0	112.424	0	0		0	177.067	0	0		0	171.446	0	0		0	137.719	0	0
	0	118.704	0	0		0	113.052	0	0		0	178.057	0	0		0	172.404	0	0		0	138.488	0	0
	0	119.364	0	0		0	113.68	0	0		0	179.046	0	0		0	173.362	0	0		0	139.258	0	0
	0	120.023	0	0		0	114.308	0	0		0	180.035	0	0		0	174.32	0	0		0	140.027	0	0
	10.0569	120.683	8.33333	79.2083		0	114.936	0	0		0	181.024	0	0		0	175.277	0	0		0	140.797	0	0
	0	121.342	0	0		0	115.564	0	0		0	182.013	0	0		0	176.235	0	0		0	141.566	0	0
	0	122.002	0	0		0	116.192	0	0		0	183.003	0	0		0	177.193	0	0		0	142.335	0	0
	0	122.661	0	0		0	116.82	0	0		0	183.992	0	0		0	178.151	0	0		0	143.105	0	0
	0	123.321	0	0		0	117.448	0	0		6.85115	184.981	3.7037	79.7552		0	179.109	0	0		0	143.874	0	0
	0	123.98	0	0		0	118.076	0	0		0	185.97	0	0		0	180.066	0	0		7.50003	144.643	5.18518	9.63611
	0	124.64	0	0		0	118.704	0	0		0	186.959	0	0		0	181.024	0	0		0	145.413	0	0
	0	125.299	0	0		0	119.332	0	0		0	187.949	0	0		0	181.982	0	0		0	146.182	0	0
	0	125.959	0	0		0	119.96	0	0		0	188.938	0	0		0	182.94	0	0		0	146.952	0	0
	0	126.618	0	0		3.34968	120.589	2.77778	51.394		0	189.927	0	0		0	183.898	0	0		0	147.721	0	0
	0	127.278	0	0		0	121.217	0	0		0	190.916	0	0		0	184.855	0	0		0	148.49	0	0
	0	127.937	0	0		0	121.845	0	0		0	191.905	0	0		0	185.813	0	0		0	149.26	0	0
	1.78606	128.596	1.38889	7.29402		0	122.473	0	0		8.57309	192.895	4.44444	65.8471		0	186.771	0	0		0	150.029	0	0
	0	129.256	0	0		0	123.101	0	0		0	193.884	0	0		0	187.729	0	0		0	150.798	0	0
	0	129.915	0	0		0	123.729	0	0		0	194.873	0	0		0	188.687	0	0		0	151.568	0	0
	0	130.575	0	0		0	124.357	0	0		0	195.862	0	0		0	189.644	0	0		7.89897	152.337	5.18518	23.5823
	0	131.234	0	0		0	124.985	0	0		0	196.851	0	0		0	190.602	0	0		0	153.107	0	0
	0	131.894	0	0		0	125.613	0	0		0	197.841	0	0		0	191.56	0	0		0	153.876	0	0
	0	132.553	0	0		0	126.241	0	0		0	198.83	0	0		8.02158	192.518	4.16667	5.16566		0	154.645	0	0
	0	133.213	0	0		0	126.869	0	0		0	199.819	0	0		0	193.476	0	0		0	155.415	0	0
	0	133.872	0	0		0	127.497	0	0		7.43735	200.808	3.7037	34.6286		0	194.433	0	0		0	156.184	0	0
	0	134.532	0	0		7.11808	128.125	5.55556	69.9231		0	201.798	0	0		0	195.391	0	0		0	156.954	0	0
	0	135.191	0	0		0	128.753	0	0		0	202.787	0	0		0	196.349	0	0		0	157.723	0	0
	0	135.851	0	0		0	129.381	0	0		0	203.776	0	0		0	197.307	0	0		0	158.492	0	0
	1.89597	136.51	1.38889	3.12624		0	130.01	0	0		0	204.765	0	0		0	198.265	0	0		0	159.262	0	0
	0	137.169	0	0		0	130.638	0	0		0	205.754	0	0		0	199.222	0	0		0	160.031	0	0
	0	137.829	0	0		0	131.266	0	0		0	206.744	0	0		0	200.18	0	0		4.76446	160.8	2.96296	26.2934
	0	138.488	0	0		0	131.894	0	0		0	207.733	0	0		0	201.138	0	0		0	161.57	0	0
	0	139.148	0	0		0	132.522	0	0		7.73044	208.722	3.7037	19.0239		0	202.096	0	0		0	162.339	0	0
	0	139.807	0	0		0	133.15	0	0		0	209.711	0	0		0	203.054	0	0		0	163.109	0	0
	0	140.467	0	0		0	133.778	0	0		0	210.7	0	0		0	204.011	0	0		0	163.878	0	0
	0	141.126	0	0		0	134.406	0	0		0	211.69	0	0		0	204.969	0	0		0	164.647	0	0
	0	141.786	0	0		0	135.034	0	0		0	212.679	0	0		0	205.927	0	0		0	165.417	0	0
	0	142.445	0	0		0	135.662	0	0		0	213.668	0	0		0	206.885	0	0		0	166.186	0	0
	0	143.105	0	0		5.67876	136.29	4.16667	31.0815		0	214.657	0	0		0	207.843	0	0		0	166.956	0	0
	0	143.764	0	0		0	136.918	0	0		0	215.646	0	0		0	208.8	0	0		0	167.725	0	0
	6.01765	144.424	4.16667	2.09408		0	137.546	0	0		11.233	216.636	5.18518	11.2812		0	209.758	0	0		9.98485	168.494	5.92593	83.2582
	0	145.083	0	0		0	138.174	0	0		0	217.625	0	0		0	210.716	0	0		0	169.264	0	0
	0	145.743	0	0		0	138.803	0	0		0	218.614	0	0		0	211.674	0	0		0	170.033	0	0
	0	146.402	0	0		0	139.431	0	0		0	219.603	0	0		0	212.632	0	0		0	170.802	0	0
	0	147.061	0	0		0	140.059	0	0		0	220.592	0	0		0	213.589	0	0		0	171.572	0	0
	0	147.721	0	0		0	140.687	0	0		0	221.582	0	0		0	214.547	0	0		0	172.341	0	0
	0	148.381	0	0		0	141.315	0	0		0	222.571	0	0		0	215.505	0	0		0	173.111	0	0
	0	149.04	0	0		0	141.943	0	0		0	223.56	0	0		9.01928	216.463	4.16667	6.83793		0	173.88	0	0
	0	149.699	0	0		0	142.571	0	0		6.65331	224.549	2.96296	1.38483		0	217.421	0	0		0	174.649	0	0
	0	150.359	0	0		0	143.199	0	0		0	225.538	0	0		0	218.378	0	0		0	175.419	0	0
	0	151.018	0	0		0	143.827	0	0		0	226.528	0	0		0	219.336	0	0		3.91529	176.188	2.22222	45.3545
	0	151.678	0	0		4.01264	144.455	2.77778	10.1838		0	227.517	0	0		0	220.294	0	0		0	176.958	0	0
	12.6948	152.337	8.33333	0.0566252		0	145.083	0	0		0	228.506	0	0		0	221.252	0	0		0	177.727	0	0
	0	152.997	0	0		0	145.711	0	0		0	229.495	0	0		0	222.21	0	0		0	178.496	0	0
	0	153.656	0	0		0	146.339	0	0		0	230.484	0	0		0	223.167	0	0		0	179.266	0	0
	0	154.316	0	0		0	146.967	0	0		0	231.474	0	0		0	224.125	0	0		0	180.035	0	0
	0	154.975	0	0		0	147.595	0	0		5.16584	232.463	2.22222	0.0257845		18.7569	225.083	8.33333	38.2731		0	180.804	0	0
	0	155.635	0	0		0	148.224	0	0		0	233.452	0	0		0	226.041	0	0		0	181.574	0	0
	0	156.294	0	0		0	148.851	0	0		0	234.441	0	0		0	226.999	0	0		0	182.343	0	0
	0	156.954	0	0		0	149.48	0	0		0	235.43	0	0		0	227.956	0	0		0	183.113	0	0
	0	157.613	0	0		0	150.108	0	0		0	236.42	0	0		0	228.914	0	0		0	183.882	0	0
	0	158.273	0	0		0	150.736	0	0		0	237.409	0	0		0	229.872	0	0		4.10336	184.651	2.22222	63.9391
	0	158.932	0	0		0	151.364	0	0		0	238.398	0	0		0	230.83	0	0		0	185.421	0	0
	0	159.591	0	0		0	151.992	0	0		0	239.387	0	0		0	231.788	0	0		0	186.19	0	0
	8.90283	160.251	5.55556	4.24174		2.11972	152.62	1.38889	1.67521		16.0251	240.376	6.66667	5.38893		0	232.745	0	0		0	186.959	0	0
	0	160.91	0	0		0	153.248	0	0		0	241.366	0	0		0	233.703	0	0		0	187.729	0	0
	0	161.57	0	0		0	153.876	0	0		0	242.355	0	0		0	234.661	0	0		0	188.498	0	0
	0	162.229	0	0		0	154.504	0	0		0	243.344	0	0		0	235.619	0	0		0	189.268	0	0
	0	162.889	0	0		0	155.132	0	0		0	244.333	0	0		0	236.577	0	0		0	190.037	0	0
	0	163.548	0	0		0	155.76	0	0		0	245.322	0	0		0	237.534	0	0		0	190.806	0	0
	0	164.208	0	0		0	156.388	0	0		0	246.312	0	0		0	238.492	0	0		0	191.576	0	0
	0	164.867	0	0		0	157.016	0	0		0	247.301	0	0		0	239.45	0	0		5.69911	192.345	2.96296	111.462
	0	165.527	0	0		0	157.644	0	0		9.19593	248.29	3.7037	10.5836		0	240.408	0	0		0	193.114	0	0
	0	166.186	0	0		0	158.273	0	0		0	249.279	0	0		0	241.366	0	0		0	193.884	0	0
	0	166.846	0	0		0	158.901	0	0		0	250.268	0	0		0	242.323	0	0		0	194.653	0	0
	0	167.505	0	0		0	159.529	0	0		0	251.258	0	0		0	243.281	0	0		0	195.423	0	0
	0	168.165	0	0		0	160.157	0	0		0	252.247	0	0		0	244.239	0	0		0	196.192	0	0
	9.37911	168.824	5.55556	16.6484		4.46624	160.785	2.77778	0.220521		0	253.236	0	0		0	245.197	0	0		0	196.961	0	0
	0	169.483	0	0		0	161.413	0	0		0	254.225	0	0		0	246.155	0	0		0	197.731	0	0
	0	170.143	0	0		0	162.041	0	0		0	255.214	0	0		0	247.112	0	0		0	198.5	0	0
	0	170.802	0	0		0	162.669	0	0		0	256.204	0	0		0	248.07	0	0		0	199.269	0	0
	0	171.462	0	0		0	163.297	0	0		5.71539	257.193	2.22222	14.8002		10.3762	249.028	4.16667	85.79		0	200.039	0	0
	0	172.121	0	0		0	163.925	0	0		0	258.182	0	0		0	249.986	0	0		1.48747	200.808	0.740741	36.0862
	0	172.781	0	0		0	164.553	0	0		0	259.171	0	0		0	250.944	0	0		0	201.578	0	0
	0	173.44	0	0		0	165.181	0	0		0	260.161	0	0		0	251.901	0	0		0	202.347	0	0
	0	174.1	0	0		0	165.809	0	0		0	261.15	0	0		0	252.859	0	0		0	203.116	0	0
	0	174.759	0	0		0	166.437	0	0		0	262.139	0	0		0	253.817	0	0		0	203.886	0	0
	0	175.419	0	0		0	167.065	0	0		0	263.128	0	0		0	254.775	0	0		0	204.655	0	0
	0	176.078	0	0		0	167.694	0	0		0	264.117	0	0		0	255.733	0	0		0	205.424	0	0
	4.90938	176.738	2.77778	17.6746		4.6756	168.322	2.77778	0.61864		15.71	265.106	5.92593	67.3835		0	256.69	0	0		0	206.194	0	0
	0	177.397	0	0		0	168.95	0	0		0	266.096	0	0		0	257.648	0	0		0	206.963	0	0
	0	178.057	0	0		0	169.578	0	0		0	267.085	0	0		0	258.606	0	0		0	207.733	0	0
	0	178.716	0	0		0	170.206	0	0		0	268.074	0	0		0	259.564	0	0		1.54446	208.502	0.740741	44.4803
	0	179.375	0	0		0	170.834	0	0		0	269.063	0	0		0	260.522	0	0		0	209.272	0	0
	0	180.035	0	0		0	171.462	0	0		0	270.053	0	0		0	261.479	0	0		0	210.041	0	0
	0	180.695	0	0		0	172.09	0	0		0	271.042	0	0		0	262.437	0	0		0	210.81	0	0
	0	181.354	0	0		0	172.718	0	0		0	272.031	0	0		0	263.395	0	0		0	211.58	0	0
	0	182.013	0	0		0	173.346	0	0		12.1342	273.02	4.44444	77.0413		0	264.353	0	0		0	212.349	0	0
	0	182.673	0	0		0	173.974	0	0		0	274.009	0	0		0	265.311	0	0		0	213.118	0	0
	0	183.332	0	0		0	174.602	0	0		0	274.998	0	0		0	266.268	0	0		0	213.888	0	0
	0	183.992	0	0		0	175.23	0	0		0	275.988	0	0		0	267.226	0	0		0	214.657	0	0
	12.823	184.651	6.94444	76.2603		0	175.858	0	0		0	276.977	0	0		0	268.184	0	0		0	215.427	0	0
	0	185.311	0	0		4.9024	176.486	2.77778	4.61106		0	277.966	0	0		0	269.142	0	0		0	216.196	0	0
	0	185.97	0	0		0	177.114	0	0		0	278.955	0	0		0	270.1	0	0		4.82145	216.965	2.22222	164.18
	0	186.63	0	0		0	177.743	0	0		0	279.945	0	0		0	271.057	0	0		0	217.735	0	0
	0	187.289	0	0		0	178.371	0	0		8.32396	280.934	2.96296	72.7411		0	272.015	0	0		0	218.504	0	0
	0	187.949	0	0		0	178.999	0	0		0	281.923	0	0		0	272.973	0	0		0	219.273	0	0
	0	188.608	0	0		0	179.627	0	0		0	282.912	0	0		0	273.931	0	0		0	220.043	0	0
	0	189.268	0	0		0	180.255	0	0		0	283.901	0	0		0	274.889	0	0		0	220.812	0	0
	0	189.927	0	0		0	180.883	0	0		0	284.891	0	0		0	275.846	0	0		0	221.582	0	0
	0	190.587	0	0		0	181.511	0	0		0	285.88	0	0		0	276.804	0	0		0	222.351	0	0
	0	191.246	0	0		0	182.139	0	0		0	286.869	0	0		0	277.762	0	0		0	223.12	0	0
	0	191.905	0	0		0	182.767	0	0		0	287.858	0	0		0	278.72	0	0		0	223.89	0	0
	5.34903	192.565	2.77778	46.8128		0	183.395	0	0		10.698	288.847	3.7037	122.291		0	279.678	0	0		1.66414	224.659	0.740741	64.9623
	0	193.224	0	0		0	184.023	0	0		0	289.837	0	0		0	280.635	0	0		0	225.428	0	0
	0	193.884	0	0		5.1292	184.651	2.77778	12.3071		0	290.826	0	0		0	281.593	0	0		0	226.198	0	0
	0	194.543	0	0		0	185.279	0	0		0	291.815	0	0		0	282.551	0	0		0	226.967	0	0
	0	195.203	0	0		0	185.907	0	0		0	292.804	0	0		0	283.509	0	0		0	227.737	0	0
	0	195.862	0	0		0	186.536	0	0		0	293.793	0	0		0	284.467	0	0		0	228.506	0	0
	0	196.522	0	0		0	187.163	0	0		0	294.783	0	0		0	285.424	0	0		0	229.275	0	0
	0	197.181	0	0		0	187.792	0	0		0	295.772	0	0		0	286.382	0	0		0	230.045	0	0
	0	197.841	0	0		0	188.42	0	0		4.39646	296.761	1.48148	63.3176		0	287.34	0	0		0	230.814	0	0
	0	198.5	0	0		0	189.048	0	0		0	297.75	0	0		0	288.298	0	0		0	231.583	0	0
	0	199.16	0	0		0	189.676	0	0		0	298.739	0	0		0	289.256	0	0		0	232.353	0	0
	0	199.819	0	0		0	190.304	0	0		0	299.729	0	0		0	290.213	0	0		0	233.122	0	0
	2.78442	200.478	1.38889	33.3003		0	190.932	0	0		0	300.718	0	0		0	291.171	0	0		0	233.892	0	0
	0	201.138	0	0		0	191.56	0	0		0	301.707	0	0		0	292.129	0	0		0	234.661	0	0
	0	201.798	0	0		0	192.188	0	0		0	302.696	0	0		0	293.087	0	0		0	235.43	0	0
	0	202.457	0	0		5.356	192.816	2.77778	23.7067		0	303.685	0	0		0	294.045	0	0		0	236.2	0	0
	0	203.116	0	0		0	193.444	0	0		2.25685	304.675	0.740741	39.7872		0	295.002	0	0		0	236.969	0	0
	0	203.776	0	0		0	194.072	0	0		0	305.664	0	0		0	295.96	0	0		0	237.738	0	0
	0	204.435	0	0		0	194.7	0	0		0	306.653	0	0		0	296.918	0	0		0	238.508	0	0
	0	205.095	0	0		0	195.328	0	0		0	307.642	0	0		0	297.876	0	0		0	239.277	0	0
	0	205.754	0	0		0	195.957	0	0		0	308.631	0	0		0	298.834	0	0		0	240.047	0	0
	0	206.414	0	0		0	196.584	0	0		0	309.621	0	0		0	299.791	0	0		1.78382	240.816	0.740741	89.3118
	0	207.073	0	0		0	197.213	0	0		0	310.61	0	0		0	300.749	0	0		0	241.585	0	0
	0	207.733	0	0		0	197.841	0	0		0	311.599	0	0		0	301.707	0	0		0	242.355	0	0
	2.89434	208.392	1.38889	44.934		0	198.469	0	0		6.94641	312.588	2.22222	146.531		0	302.665	0	0		0	243.124	0	0
	0	209.052	0	0		0	199.097	0	0		0	313.577	0	0		0	303.623	0	0		0	243.894	0	0
	0	209.711	0	0		0	199.725	0	0		0	314.567	0	0		0	304.58	0	0		0	244.663	0	0
	0	210.371	0	0		11.1307	200.353	5.55556	75.0334		0	315.556	0	0		0	305.538	0	0		0	245.432	0	0
	0	211.03	0	0		0	200.981	0	0		0	316.545	0	0		0	306.496	0	0		0	246.202	0	0
	0	211.69	0	0		0	201.609	0	0		0	317.534	0	0		0	307.454	0	0		0	246.971	0	0
	0	212.349	0	0		0	202.237	0	0		0	318.523	0	0		0	308.412	0	0		0	247.74	0	0
	0	213.008	0	0		0	202.865	0	0		0	319.513	0	0		0	309.369	0	0		3.68163	248.51	1.48148	204.532
	0	213.668	0	0		0	203.493	0	0		0	320.502	0	0		0	310.327	0	0		0	249.279	0	0
	0	214.327	0	0		0	204.121	0	0		0	321.491	0	0		0	311.285	0	0		0	250.049	0	0
	0	214.987	0	0		0	204.749	0	0		0	322.48	0	0		0	312.243	0	0		0	250.818	0	0
	0	215.646	0	0		0	205.377	0	0		0	323.469	0	0		0	313.201	0	0		0	251.587	0	0
	0	216.306	0	0		0	206.006	0	0		0	324.459	0	0		0	314.158	0	0		0	252.357	0	0
	0	216.965	0	0		0	206.634	0	0		0	325.448	0	0		0	315.116	0	0		0	253.126	0	0
	0	217.625	0	0		0	207.262	0	0		0	326.437	0	0		0	316.074	0	0		0	253.895	0	0
	0	218.284	0	0		0	207.89	0	0		0	327.426	0	0		0	317.032	0	0		0	254.665	0	0
	0	218.944	0	0		0	208.518	0	0		0	328.416	0	0		0	317.99	0	0		0	255.434	0	0
	0	219.603	0	0		0	209.146	0	0		9.76014	329.405	2.96296	284.674		0	318.947	0	0		0	256.204	0	0
	0	220.263	0	0		0	209.774	0	0		0	330.394	0	0		0	319.905	0	0		0	256.973	0	0
	0	220.922	0	0		0	210.402	0	0		0	331.383	0	0		13.3693	320.863	4.16667	572.432		0	257.742	0	0
	0	221.582	0	0		0	211.03	0	0		0	332.372	0	0		0	321.821	0	0		0	258.512	0	0
	0	222.241	0	0		0	211.658	0	0		0	333.361	0	0		0	322.779	0	0		0	259.281	0	0
	0	222.9	0	0		0	212.286	0	0		0	334.351	0	0		0	323.736	0	0		0	260.051	0	0
	0	223.56	0	0		0	212.914	0	0		0	335.34	0	0		0	324.694	0	0		0	260.82	0	0
	0	224.219	0	0		0	213.542	0	0		0	336.329	0	0		0	325.652	0	0		0	261.589	0	0
	9.36995	224.879	4.16667	224.273		0	214.17	0	0		2.49865	337.318	0.740741	83.1239		0	326.61	0	0		0	262.359	0	0
	0	225.538	0	0		0	214.798	0	0		0	338.308	0	0		0	327.568	0	0		0	263.128	0	0
	0	226.198	0	0		0	215.427	0	0		0	339.297	0	0		0	328.525	0	0		0	263.897	0	0
	0	226.857	0	0		0	216.055	0	0		0	340.286	0	0		0	329.483	0	0		3.92099	264.667	1.48148	264.649
	0	227.517	0	0		6.01896	216.683	2.77778	78.2642		0	341.275	0	0		0	330.441	0	0		0	265.436	0	0
	0	228.176	0	0		0	217.311	0	0		0	342.264	0	0		0	331.399	0	0		0	266.206	0	0
	0	228.836	0	0		0	217.939	0	0		0	343.253	0	0		0	332.357	0	0		0	266.975	0	0
	0	229.495	0	0		0	218.567	0	0		0	344.243	0	0		0	333.314	0	0		0	267.744	0	0
	0	230.155	0	0		0	219.195	0	0		0	345.232	0	0		0	334.272	0	0		0	268.514	0	0
	0	230.814	0	0		0	219.823	0	0		0	346.221	0	0		0	335.23	0	0		0	269.283	0	0
	0	231.474	0	0		0	220.451	0	0		0	347.21	0	0		0	336.188	0	0		0	270.053	0	0
	0	232.133	0	0		0	221.079	0	0		0	348.2	0	0		0	337.146	0	0		0	270.822	0	0
	6.46646	232.792	2.77778	183.51		0	221.707	0	0		0	349.189	0	0		0	338.103	0	0		0	271.591	0	0
	0	233.452	0	0		0	222.335	0	0		0	350.178	0	0		0	339.061	0	0		0	272.361	0	0
	0	234.112	0	0		0	222.963	0	0		0	351.167	0	0		0	340.019	0	0		2.02319	273.13	0.740741	149.613
	0	234.771	0	0		0	223.591	0	0		0	352.156	0	0		0	340.977	0	0		0	273.899	0	0
	0	235.43	0	0		0	224.219	0	0		0	353.146	0	0		0	341.935	0	0		0	274.669	0	0
	0	236.09	0	0		12.4915	224.847	5.55556	208.387		0	354.135	0	0		0	342.892	0	0		0	275.438	0	0
	0	236.749	0	0		0	225.476	0	0		0	355.124	0	0		0	343.85	0	0		0	276.207	0	0
	0	237.409	0	0		0	226.104	0	0		0	356.113	0	0		14.367	344.808	4.16667	830.206		0	276.977	0	0
	0	238.068	0	0		0	226.732	0	0		0	357.102	0	0		0	345.766	0	0		0	277.746	0	0
	0	238.728	0	0		0	227.36	0	0		0	358.092	0	0		0	346.724	0	0		0	278.516	0	0
	0	239.387	0	0		0	227.988	0	0		0	359.081	0	0		0	347.681	0	0		0	279.285	0	0
	0	240.047	0	0		0	228.616	0	0		0	360.07	0	0		0	348.639	0	0		0	280.054	0	0
	0	240.706	0	0		0	229.244	0	0		0	361.059	0	0		0	349.597	0	0		2.08018	280.824	0.740741	166.25
	0	241.366	0	0		0	229.872	0	0		0	362.048	0	0		0	350.555	0	0		0	281.593	0	0
	0	242.025	0	0		0	230.5	0	0		0	363.038	0	0		0	351.513	0	0		0	282.363	0	0
	0	242.685	0	0		0	231.128	0	0		0	364.027	0	0		0	352.47	0	0		0	283.132	0	0
	0	243.344	0	0		0	231.756	0	0		0	365.016	0	0		14.7262	353.428	4.16667	934.702		0	283.901	0	0
	0	244.004	0	0		12.9102	232.384	5.55556	262.831		0	366.005	0	0		0	354.386	0	0		0	284.671	0	0
	0	244.663	0	0		0	233.012	0	0		0	366.994	0	0		0	355.344	0	0		0	285.44	0	0
	0	245.322	0	0		0	233.64	0	0		0	367.984	0	0		0	356.302	0	0		0	286.209	0	0
	0	245.982	0	0		0	234.268	0	0		5.46626	368.973	1.48148	280.448		0	357.259	0	0		0	286.979	0	0
	0	246.641	0	0		0	234.897	0	0		0	369.962	0	0		0	358.217	0	0		0	287.748	0	0
	0	247.301	0	0		0	235.525	0	0		0	370.951	0	0		0	359.175	0	0		4.27433	288.518	1.48148	367.53
	0	247.96	0	0		0	236.153	0	0		0	371.94	0	0		0	360.133	0	0		0	289.287	0	0
	3.45305	248.62	1.38889	130.969		0	236.781	0	0		0	372.93	0	0		15.0454	361.091	4.16667	1032.78		0	290.056	0	0
	0	249.279	0	0		0	237.409	0	0		0	373.919	0	0		0	362.048	0	0		0	290.826	0	0
	0	249.939	0	0		0	238.037	0	0		0	374.908	0	0		0	363.006	0	0		0	291.595	0	0
	0	250.598	0	0		0	238.665	0	0		0	375.897	0	0		0	363.964	0	0		0	292.365	0	0
	0	251.258	0	0		0	239.293	0	0		5.5835	376.886	1.48148	313.637		0	364.922	0	0		0	293.134	0	0
	0	251.917	0	0		0	239.921	0	0		0	377.876	0	0		0	365.88	0	0		0	293.903	0	0
	0	252.577	0	0		6.68192	240.549	2.77778	164.467		0	378.865	0	0		0	366.837	0	0		0	294.673	0	0
	0	253.236	0	0		0	241.177	0	0		0	379.854	0	0		0	367.795	0	0		0	295.442	0	0
	0	253.895	0	0		0	241.805	0	0		0	380.843	0	0		0	368.753	0	0		0	296.211	0	0
	0	254.555	0	0		0	242.433	0	0		0	381.832	0	0		0	369.711	0	0		0	296.981	0	0
	0	255.214	0	0		0	243.061	0	0		0	382.822	0	0		0	370.669	0	0		0	297.75	0	0
	0	255.874	0	0		0	243.689	0	0		0	383.811	0	0		0	371.626	0	0		0	298.52	0	0
	3.56296	256.533	1.38889	153.185		0	244.317	0	0		0	384.8	0	0		0	372.584	0	0		0	299.289	0	0
	0	257.193	0	0		0	244.946	0	0		0	385.789	0	0		0	373.542	0	0		0	300.058	0	0
	0	257.852	0	0		0	245.574	0	0		0	386.779	0	0		0	374.5	0	0		0	300.828	0	0
	0	258.512	0	0		0	246.202	0	0		0	387.768	0	0		0	375.458	0	0		0	301.597	0	0
	0	259.171	0	0		0	246.83	0	0		0	388.757	0	0		0	376.415	0	0		0	302.366	0	0
	0	259.831	0	0		0	247.458	0	0		0	389.746	0	0		0	377.373	0	0		0	303.136	0	0
	0	260.49	0	0		0	248.086	0	0		0	390.735	0	0		0	378.331	0	0		0	303.905	0	0
	0	261.15	0	0		6.90872	248.714	2.77778	201.222		0	391.724	0	0		0	379.289	0	0		0	304.675	0	0
	0	261.809	0	0		0	249.342	0	0		5.81798	392.714	1.48148	385.581		0	380.247	0	0		0	305.444	0	0
	0	262.469	0	0		0	249.97	0	0		0	393.703	0	0		0	381.204	0	0		0	306.213	0	0
	0	263.128	0	0		0	250.598	0	0		0	394.692	0	0		0	382.162	0	0		0	306.983	0	0
	0	263.788	0	0		0	251.226	0	0		0	395.681	0	0		0	383.12	0	0		0	307.752	0	0
	0	264.447	0	0		0	251.854	0	0		0	396.671	0	0		0	384.078	0	0		0	308.522	0	0
	0	265.106	0	0		0	252.482	0	0		0	397.66	0	0		0	385.036	0	0		0	309.291	0	0
	0	265.766	0	0		0	253.11	0	0		0	398.649	0	0		0	385.993	0	0		0	310.06	0	0
	0	266.425	0	0		0	253.738	0	0		0	399.638	0	0		0	386.951	0	0		0	310.83	0	0
	0	267.085	0	0		0	254.367	0	0		0	400.627	0	0		0	387.909	0	0		0	311.599	0	0
	0	267.744	0	0		0	254.995	0	0		0	401.616	0	0		0	388.867	0	0		0	312.368	0	0
	0	268.404	0	0		0	255.623	0	0		0	402.606	0	0		0	389.825	0	0		0	313.138	0	0
	0	269.063	0	0		0	256.251	0	0		0	403.595	0	0		0	390.782	0	0		0	313.907	0	0
	0	269.723	0	0		3.56776	256.879	1.38889	120.84		0	404.584	0	0		0	391.74	0	0		0	314.677	0	0
	0	270.382	0	0		0	257.507	0	0		0	405.573	0	0		0	392.698	0	0		0	315.446	0	0
	0	271.042	0	0		0	258.135	0	0		0	406.562	0	0		0	393.656	0	0		0	316.215	0	0
	0	271.701	0	0		0	258.763	0	0		0	407.552	0	0		0	394.614	0	0		0	316.985	0	0
	0	272.361	0	0		0	259.391	0	0		0	408.541	0	0		0	395.571	0	0		0	317.754	0	0
	7.58389	273.02	2.77778	410.111		0	260.019	0	0		9.10067	409.53	2.22222	705.233		0	396.529	0	0		0	318.523	0	0
	0	273.68	0	0		0	260.647	0	0		0	410.519	0	0		0	397.487	0	0		0	319.293	0	0
	0	274.339	0	0		0	261.275	0	0		0	411.509	0	0		0	398.445	0	0		0	320.062	0	0
	0	274.998	0	0		0	261.903	0	0		0	412.498	0	0		0	399.403	0	0		2.37653	320.832	0.740741	266.902
	0	275.658	0	0		0	262.531	0	0		0	413.487	0	0		0	400.36	0	0		0	321.601	0	0
	0	276.317	0	0		0	263.159	0	0		0	414.476	0	0		0	401.318	0	0		0	322.37	0	0
	0	276.977	0	0		0	263.788	0	0		0	415.465	0	0		0	402.276	0	0		0	323.14	0	0
	0	277.636	0	0		0	264.416	0	0		0	416.455	0	0		0	403.234	0	0		0	323.909	0	0
	0	278.296	0	0		7.36233	265.044	2.77778	285.843		0	417.444	0	0		0	404.192	0	0		0	324.678	0	0
	0	278.955	0	0		0	265.672	0	0		0	418.433	0	0		0	405.149	0	0		0	325.448	0	0
	0	279.615	0	0		0	266.3	0	0		0	419.422	0	0		0	406.107	0	0		0	326.217	0	0
	0	280.274	0	0		0	266.928	0	0		0	420.411	0	0		0	407.065	0	0		0	326.987	0	0
	3.90186	280.934	1.38889	232.635		0	267.556	0	0		0	421.401	0	0		0	408.023	0	0		0	327.756	0	0
	0	281.593	0	0		0	268.184	0	0		0	422.39	0	0		17.0409	408.981	4.16667	1756.66		0	328.525	0	0
	0	282.253	0	0		0	268.812	0	0		0	423.379	0	0		0	409.938	0	0		0	329.295	0	0
	0	282.912	0	0		0	269.44	0	0		0	424.368	0	0		0	410.896	0	0		0	330.064	0	0
	0	283.572	0	0		0	270.068	0	0		0	425.357	0	0		0	411.854	0	0		0	330.834	0	0
	0	284.231	0	0		0	270.696	0	0		0	426.347	0	0		0	412.812	0	0		0	331.603	0	0
	0	284.891	0	0		0	271.324	0	0		0	427.336	0	0		0	413.77	0	0		0	332.372	0	0
	0	285.55	0	0		0	271.952	0	0		0	428.325	0	0		0	414.727	0	0		0	333.142	0	0
	0	286.209	0	0		11.3575	272.58	4.16667	494.843		0	429.314	0	0		0	415.685	0	0		0	333.911	0	0
	0	286.869	0	0		0	273.209	0	0		0	430.303	0	0		0	416.643	0	0		0	334.68	0	0
	0	287.528	0	0		0	273.837	0	0		0	431.293	0	0		0	417.601	0	0		0	335.45	0	0
	0	288.188	0	0		0	274.465	0	0		0	432.282	0	0		0	418.559	0	0		0	336.219	0	0
	8.02354	288.847	2.77778	523.909		0	275.093	0	0		0	433.271	0	0		0	419.516	0	0		0	336.989	0	0
	0	289.507	0	0		0	275.721	0	0		0	434.26	0	0		0	420.474	0	0		0	337.758	0	0
	0	290.166	0	0		0	276.349	0	0		0	435.249	0	0		0	421.432	0	0		0	338.527	0	0
	0	290.826	0	0		0	276.977	0	0		0	436.239	0	0		0	422.39	0	0		0	339.297	0	0
	0	291.485	0	0		0	277.605	0	0		0	437.228	0	0		0	423.348	0	0		0	340.066	0	0
	0	292.145	0	0		0	278.233	0	0		0	438.217	0	0		0	424.305	0	0		0	340.836	0	0
	0	292.804	0	0		0	278.861	0	0		0	439.206	0	0		0	425.263	0	0		0	341.605	0	0
	0	293.464	0	0		0	279.489	0	0		0	440.195	0	0		0	426.221	0	0		0	342.374	0	0
	0	294.123	0	0		0	280.117	0	0		0	441.185	0	0		0	427.179	0	0		0	343.144	0	0
	0	294.783	0	0		0	280.745	0	0		0	442.174	0	0		0	428.137	0	0		0	343.913	0	0
	0	295.442	0	0		0	281.373	0	0		0	443.163	0	0		0	429.094	0	0		0	344.682	0	0
	0	296.101	0	0		0	282.002	0	0		0	444.152	0	0		0	430.052	0	0		0	345.452	0	0
	0	296.761	0	0		0	282.63	0	0		0	445.142	0	0		0	431.01	0	0		0	346.221	0	0
	0	297.421	0	0		0	283.258	0	0		0	446.131	0	0		0	431.968	0	0		0	346.99	0	0
	0	298.08	0	0		0	283.886	0	0		0	447.12	0	0		0	432.926	0	0		0	347.76	0	0
	0	298.739	0	0		0	284.514	0	0		0	448.109	0	0		0	433.883	0	0		0	348.529	0	0
	0	299.399	0	0		0	285.142	0	0		3.32665	449.098	0.740741	351.102		0	434.841	0	0		0	349.299	0	0
	0	300.058	0	0		0	285.77	0	0		0	450.087	0	0		0	435.799	0	0		0	350.068	0	0
	0	300.718	0	0		0	286.398	0	0		0	451.077	0	0		0	436.757	0	0		0	350.837	0	0
	0	301.377	0	0		0	287.026	0	0		0	452.066	0	0		0	437.715	0	0		0	351.607	0	0
	0	302.037	0	0		0	287.654	0	0		0	453.055	0	0		0	438.672	0	0		0	352.376	0	0
	0	302.696	0	0		0	288.282	0	0		0	454.044	0	0		0	439.63	0	0		0	353.146	0	0
	0	303.356	0	0		4.01264	288.91	1.38889	218.084		0	455.034	0	0		0	440.588	0	0		0	353.915	0	0
	0	304.015	0	0		0	289.538	0	0		0	456.023	0	0		0	441.546	0	0		0	354.684	0	0
	0	304.675	0	0		0	290.166	0	0		0	457.012	0	0		0	442.504	0	0		0	355.454	0	0
	0	305.334	0	0		0	290.794	0	0		0	458.001	0	0		0	443.461	0	0		0	356.223	0	0
	0	305.993	0	0		0	291.422	0	0		0	458.99	0	0		0	444.419	0	0		0	356.993	0	0
	0	306.653	0	0		0	292.05	0	0		0	459.979	0	0		0	445.377	0	0		0	357.762	0	0
	0	307.312	0	0		0	292.679	0	0		0	460.969	0	0		0	446.335	0	0		0	358.531	0	0
	0	307.972	0	0		0	293.307	0	0		0	461.958	0	0		0	447.293	0	0		0	359.301	0	0
	0	308.631	0	0		0	293.935	0	0		0	462.947	0	0		0	448.25	0	0		0	360.07	0	0
	0	309.291	0	0		0	294.563	0	0		0	463.936	0	0		0	449.208	0	0		0	360.839	0	0
	0	309.95	0	0		0	295.191	0	0		0	464.925	0	0		0	450.166	0	0		0	361.609	0	0
	0	310.61	0	0		0	295.819	0	0		0	465.915	0	0		0	451.124	0	0		0	362.378	0	0
	0	311.269	0	0		0	296.447	0	0		0	466.904	0	0		0	452.082	0	0		0	363.147	0	0
	0	311.929	0	0		4.12604	297.075	1.38889	247.43		0	467.893	0	0		0	453.039	0	0		0	363.917	0	0
	0	312.588	0	0		0	297.703	0	0		0	468.882	0	0		0	453.997	0	0		0	364.686	0	0
	0	313.248	0	0		0	298.331	0	0		0	469.872	0	0		0	454.955	0	0		0	365.456	0	0
	0	313.907	0	0		0	298.959	0	0		0	470.861	0	0		0	455.913	0	0		0	366.225	0	0
	0	314.567	0	0		0	299.587	0	0		0	471.85	0	0		19.0363	456.871	4.16667	2671.65		0	366.994	0	0
	0	315.226	0	0		0	300.215	0	0		0	472.839	0	0		0	457.828	0	0		0	367.764	0	0
	0	315.886	0	0		0	300.843	0	0		0	473.828	0	0		0	458.786	0	0		0	368.533	0	0
	0	316.545	0	0		0	301.471	0	0		0	474.818	0	0		0	459.744	0	0		0	369.303	0	0
	0	317.204	0	0		0	302.099	0	0		0	475.807	0	0		0	460.702	0	0		0	370.072	0	0
	0	317.864	0	0		0	302.728	0	0		0	476.796	0	0		0	461.66	0	0		0	370.841	0	0
	0	318.524	0	0		0	303.356	0	0		0	477.785	0	0		0	462.617	0	0		0	371.611	0	0
	0	319.183	0	0		0	303.984	0	0		0	478.774	0	0		0	463.575	0	0		0	372.38	0	0
	0	319.842	0	0		4.23072	304.612	1.38889	276.162		0	479.764	0	0		0	464.533	0	0		0	373.149	0	0
	0	320.502	0	0		0	305.24	0	0		0	480.753	0	0		0	465.491	0	0		0	373.919	0	0
	4.46057	321.161	1.38889	399.73		0	305.868	0	0		0	481.742	0	0		0	466.449	0	0		0	374.688	0	0
	0	321.821	0	0		0	306.496	0	0		0	482.731	0	0		0	467.406	0	0		0	375.458	0	0
	0	322.48	0	0		0	307.124	0	0		0	483.72	0	0		0	468.364	0	0		0	376.227	0	0
	0	323.14	0	0		0	307.752	0	0		0	484.71	0	0		0	469.322	0	0		0	376.996	0	0
	0	323.799	0	0		0	308.38	0	0		0	485.699	0	0		0	470.28	0	0		0	377.766	0	0
	0	324.459	0	0		0	309.008	0	0		0	486.688	0	0		0	471.238	0	0		0	378.535	0	0
	0	325.118	0	0		0	309.636	0	0		0	487.677	0	0		0	472.195	0	0		0	379.305	0	0
	0	325.778	0	0		0	310.264	0	0		0	488.666	0	0		0	473.153	0	0		0	380.074	0	0
	0	326.437	0	0		0	310.892	0	0		0	489.656	0	0		0	474.111	0	0		0	380.843	0	0
	0	327.097	0	0		0	311.521	0	0		0	490.645	0	0		0	475.069	0	0		0	381.613	0	0
	0	327.756	0	0		0	312.149	0	0		0	491.634	0	0		0	476.027	0	0		0	382.382	0	0
	0	328.416	0	0		0	312.777	0	0		0	492.623	0	0		0	476.984	0	0		0	383.151	0	0
	0	329.075	0	0		0	313.405	0	0		0	493.612	0	0		0	477.942	0	0		0	383.921	0	0
	0	329.734	0	0		0	314.033	0	0		0	494.602	0	0		0	478.9	0	0		0	384.69	0	0
	0	330.394	0	0		0	314.661	0	0		0	495.591	0	0		0	479.858	0	0		2.85526	385.46	0.740741	479.585
	0	331.053	0	0		0	315.289	0	0		0	496.58	0	0		0	480.816	0	0		0	386.229	0	0
	0	331.713	0	0		0	315.917	0	0		3.6857	497.569	0.740741	524.843		0	481.773	0	0		0	386.998	0	0
	0	332.372	0	0		0	316.545	0	0		0	498.558	0	0		0	482.731	0	0		0	387.768	0	0
	0	333.032	0	0		0	317.173	0	0		0	499.548	0	0		0	483.689	0	0		0	388.537	0	0
	0	333.691	0	0		0	317.801	0	0		0	500.537	0	0		0	484.647	0	0		0	389.306	0	0
	0	334.351	0	0		0	318.429	0	0		0	501.526	0	0		0	485.605	0	0		0	390.076	0	0
	0	335.01	0	0		0	319.057	0	0		0	502.515	0	0		0	486.562	0	0		0	390.845	0	0
	0	335.67	0	0		0	319.685	0	0		0	503.505	0	0		0	487.52	0	0		0	391.615	0	0
	0	336.329	0	0		0	320.313	0	0		0	504.494	0	0		0	488.478	0	0		0	392.384	0	0
	4.6804	336.989	1.38889	477.795		4.45752	320.942	1.38889	343.828		3.74432	505.483	0.740741	556.513		20.3932	489.436	4.16667	3403.01		2.91225	393.153	0.740741	509.026
	0			0		0			0		0			0		0			0		0			0
	0			0		0			0		0			0		0			0		0			0
	0			0		0			0		0			0		0			0		0			0
	0			0		0			0		0			0		0			0		0			0
	0			0		0			0		0			0		0			0		0			0
	0			0		0			0		0			0		0			0		0			0
	0			0		0			0		0			0		0			0		0			0
	0			0		0			0		0			0		0			0		0			0
	0			0		0			0		0			0		0			0		0			0
	0			0		0			0		0			0		0			0		0			0
	0			0		0			0		0			0		0			0		0			0
	0			0		0			0		0			0		0			0		0			0
	0			0		0			0		0			0		0			0		0			0
	0			0		0			0		0			0		0			0		0			0
	0			0		0			0		0			0		0			0		0			0
	0			0		0			0		0			0		0			0		0			0
	0			0		0			0		0			0		0			0		0			0
	0			0		0			0		0			0		0			0		0			0
	0			0		0			0		0			0		0			0		0			0
	0			0		0			0		0			0		0			0		0			0
	0			0		0			0		0			0		0			0		0			0
	0			0		0			0		0			0		0			0		0			0
	0			0		0			0		0			0		0			0		0			0
	0			0		0			0		0			0		0			0		0			0
	0			0		0			0		0			0		0			0		0			0
	0			0		0			0		0			0		0			0		0			0
	0			0		0			0		0			0		0			0		0			0
	0			0		0			0		0			0		0			0		0			0
	0			0		0			0		0			0		0			0		0			0
	0			0		0			0		0			0		0			0		0			0
	0			0		0			0		0			0		0			0		0			0
	0			0		0			0		0			0		0			0		0			0
	0			0		0			0		0			0		0			0		0			0
	0			0		0			0		0			0		0			0		0			0
	0			0		0			0		0			0		0			0		0			0
	0			0		0			0		0			0		0			0		0			0
	0			0		0			0		0			0		0			0		0			0
	0			0		0			0		0			0		0			0		0			0
	0			0		0			0		0			0		0			0		0			0
	0			0		0			0		0			0		0			0		0			0
	0			0		0			0		0			0		0			0		0			0
	0			0		0			0		0			0		0			0		0			0
	0			0		0			0		0			0		0			0		0			0
	0			0		0			0		0			0		0			0		0			0
	0			0		0			0		0			0		0			0		0			0
	0			0		0			0		0			0		0			0		0			0
	0			0		0			0		0			0		0			0		0			0
	0			0		0			0		0			0		0			0		0			0
	0			0		0			0		0			0		0			0		0			0
	0			0		0			0		0			0		0			0		0			0
	0			0		0			0		0			0		0			0		0			0
	0			0		0			0		0			0		0			0		0			0
	0			0		0			0		0			0		0			0		0			0
	0			0		0			0		0			0		0			0		0			0
	0			0		0			0		0			0		0			0		0			0
	0			0		0			0		0			0		0			0		0			0
	0			0		0			0		0			0		0			0		0			0
	0			0		0			0		0			0		0			0		0			0
	0			0		0			0		0			0		0			0		0			0
	0			0		0			0		0			0		0			0		0			0
	0			0		0			0		0			0		0			0		0			0
	0			0		0			0		0			0		0			0		0			0
	0			0		0			0		0			0		0			0		0			0
	0			0		0			0		0			0		0			0		0			0
	0			0		0			0		0			0		0			0		0			0
	0			0		0			0		0			0		0			0		0			0
	0			0		0			0		0			0		0			0		0			0
	0			0		0			0		0			0		0			0		0			0
	0			0		0			0		0			0		0			0		0			0
	0			0		0			0		0			0		0			0		0			0
	0			0		0			0		0			0		0			0		0			0
	0			0		0			0		0			0		0			0		0			0
	0			0		0			0		0			0		0			0		0			0
	0			0		0			0		0			0		0			0		0			0
	0			0		0			0		0			0		0			0		0			0
	0			0		0			0		0			0		0			0		0			0
	0			0		0			0		0			0		0			0		0			0
	0			0		0			0		0			0		0			0		0			0
	0			0		0			0		0			0		0			0		0			0
	0			0		0			0		0			0		0			0		0			0
	0			0		0			0		0			0		0			0		0			0
	0			0		0			0		0			0		0			0		0			0
	0			0		0			0		0			0		0			0		0			0
	0			0		0			0		0			0		0			0		0			0
	0			0		0			0		0			0		0			0		0			0
	0			0		0			0		0			0		0			0		0			0
	0			0		0			0		0			0		0			0		0			0
	0			0		0			0		0			0		0			0		0			0
	0			0		0			0		0			0		0			0		0			0
	0			0		0			0		0			0		0			0		0			0
	0			0		0			0		0			0		0			0		0			0
	0			0		0			0		0			0		0			0		0			0
	0			0		0			0		0			0		0			0		0			0
	0			0		0			0		0			0		0			0		0			0
	0			0		0			0		0			0		0			0		0			0
	0			0		0			0		0			0		0			0		0			0
	0			0		0			0		0			0		0			0		0			0
	0			0		0			0		0			0		0			0		0			0
	0			0		0			0		0			0		0			0		0			0
	0			0		0			0		0			0		0			0		0			0
	0			0		0			0		0			0		0			0		0			0
	0			0		0			0		0			0		0			0		0			0
	0			0		0			0		0			0		0			0		0			0
	0			0		0			0		0			0		0			0		0			0
	0			0		0			0		0			0		0			0		0			0
	0			0		0			0		0			0		0			0		0			0
	0			0		0			0		0			0		0			0		0			0
	0			0		0			0		0			0		0			0		0			0
	0			0		0			0		0			0		0			0		0			0
	0			0		0			0		0			0		0			0		0			0
	0			0		0			0		0			0		0			0		0			0
	0			0		0			0		0			0		0			0		0			0
	0			0		0			0		0			0		0			0		0			0
	0			0		0			0		0			0		0			0		0			0
	0			0		0			0		0			0		0			0		0			0
	0			0		0			0		0			0		0			0		0			0
	0			0		0			0		0			0		0			0		0			0
	0			0		0			0		0			0		0			0		0			0
	0			0		0			0		0			0		0			0		0			0
	0			0		0			0		0			0		0			0		0			0
	0			0		0			0		0			0		0			0		0			0
	0			0		0			0		0			0		0			0		0			0
	0			0		0			0		0			0		0			0		0			0
	0			0		0			0		0			0		0			0		0			0
	0			0		0			0		0			0		0			0		0			0
	0			0		0			0		0			0		0			0		0			0
	0			0		0			0		0			0		0			0		0			0
	0			0		0			0		0			0		0			0		0			0
	0			0		0			0		0			0		0			0		0			0
	0			0		0			0		0			0		0			0		0			0
	0			0		0			0		0			0		0			0		0			0
	0			0		0			0		0			0		0			0		0			0
	0			0		0			0		0			0		0			0		0			0
	0			0		0			0		0			0		0			0		0			0
	0			0		0			0		0			0		0			0		0			0
	0			0		0			0		0			0		0			0		0			0
	0			0		0			0		0			0		0			0		0			0
	0			0		0			0		0			0		0			0		0			0
	0			0		0			0		0			0		0			0		0			0
	0			0		0			0		0			0		0			0		0			0
	0			0		0			0		0			0		0			0		0			0
	0			0		0			0		0			0		0			0		0			0
	0			0		0			0		0			0		0			0		0			0
	0			0		0			0		0			0		0			0		0			0
	0			0		0			0		0			0		0			0		0			0
	0			0		0			0		0			0		0			0		0			0
	0			0		0			0		0			0		0			0		0			0
	0			0		0			0		0			0		0			0		0			0
	0			0		0			0		0			0		0			0		0			0
	0			0		0			0		0			0		0			0		0			0
	0			0		0			0		0			0		0			0		0			0
	0			0		0			0		0			0		0			0		0			0
	0			0		0			0		0			0		0			0		0			0
	0			0		0			0		0			0		0			0		0			0
	0			0		0			0		0			0		0			0		0			0
	0			0		0			0		0			0		0			0		0			0
	0			0		0			0		0			0		0			0		0			0
	0			0		0			0		0			0		0			0		0			0
	0			0		0			0		0			0		0			0		0			0
	0			0		0			0		0			0		0			0		0			0
	0			0		0			0		0			0		0			0		0			0
	0			0		0			0		0			0		0			0		0			0
	0			0		0			0		0			0		0			0		0			0
	0			0		0			0		0			0		0			0		0			0
	0			0		0			0		0			0		0			0		0			0
	0			0		0			0		0			0		0			0		0			0
	0			0		0			0		0			0		0			0		0			0
	0			0		0			0		0			0		0			0		0			0
	0			0		0			0		0			0		0			0		0			0
	0			0		0			0		0			0		0			0		0			0
	0			0		0			0		0			0		0			0		0			0
	0			0		0			0		0			0		0			0		0			0
	0			0		0			0		0			0		0			0		0			0
	0			0		0			0		0			0		0			0		0			0
	0			0		0			0		0			0		0			0		0			0
	0			0		0			0		0			0		0			0		0			0
	0			0		0			0		0			0		0			0		0			0
	0			0		0			0		0			0		0			0		0			0
	0			0		0			0		0			0		0			0		0			0
	0			0		0			0		0			0		0			0		0			0
	0			0		0			0		0			0		0			0		0			0
	0			0		0			0		0			0		0			0		0			0
	0			0		0			0		0			0		0			0		0			0
	0			0		0			0		0			0		0			0		0			0
	0			0		0			0		0			0		0			0		0			0
	0			0		0			0		0			0		0			0		0			0
	0			0		0			0		0			0		0			0		0			0
	0			0		0			0		0			0		0			0		0			0
	0			0		0			0		0			0		0			0		0			0
	0			0		0			0		0			0		0			0		0			0
	0			0		0			0		0			0		0			0		0			0
	0			0		0			0		0			0		0			0		0			0
	0			0		0			0		0			0		0			0		0			0
	0			0		0			0		0			0		0			0		0			0
	0			0		0			0		0			0		0			0		0			0
	0			0		0			0		0			0		0			0		0			0
	0			0		0			0		0			0		0			0		0			0
	0			0		0			0		0			0		0			0		0			0
	0			0		0			0		0			0		0			0		0			0
	0			0		0			0		0			0		0			0		0			0
	0			0		0			0		0			0		0			0		0			0
	0			0		0			0		0			0		0			0		0			0
	0			0		0			0		0			0		0			0		0			0
	0			0		0			0		0			0		0			0		0			0
	0			0		0			0		0			0		0			0		0			0
	0			0		0			0		0			0		0			0		0			0
	0			0		0			0		0			0		0			0		0			0
	0			0		0			0		0			0		0			0		0			0
	0			0		0			0		0			0		0			0		0			0
	0			0		0			0		0			0		0			0		0			0
	0			0		0			0		0			0		0			0		0			0
	0			0		0			0		0			0		0			0		0			0
	0			0		0			0		0			0		0			0		0			0
	0			0		0			0		0			0		0			0		0			0
	0			0		0			0		0			0		0			0		0			0
	0			0		0			0		0			0		0			0		0			0
	0			0		0			0		0			0		0			0		0			0
	0			0		0			0		0			0		0			0		0			0
	0			0		0			0		0			0		0			0		0			0
	0			0		0			0		0			0		0			0		0			0
	0			0		0			0		0			0		0			0		0			0
	0			0		0			0		0			0		0			0		0			0
	0			0		0			0		0			0		0			0		0			0
	0			0		0			0		0			0		0			0		0			0
	0			0		0			0		0			0		0			0		0			0
	0			0		0			0		0			0		0			0		0			0
	0			0		0			0		0			0		0			0		0			0
	0			0		0			0		0			0		0			0		0			0
	0			0		0			0		0			0		0			0		0			0
	0			0		0			0		0			0		0			0		0			0
	0			0		0			0		0			0		0			0		0			0
	0			0		0			0		0			0		0			0		0			0
	0			0		0			0		0			0		0			0		0			0
	0			0		0			0		0			0		0			0		0			0
	0			0		0			0		0			0		0			0		0			0
	0			0		0			0		0			0		0			0		0			0
	0			0		0			0		0			0		0			0		0			0
	0			0		0			0		0			0		0			0		0			0
	0			0		0			0		0			0		0			0		0			0
	0			0		0			0		0			0		0			0		0			0
	0			0		0			0		0			0		0			0		0			0
	0			0		0			0		0			0		0			0		0			0
	0			0		0			0		0			0		0			0		0			0
	0			0		0			0		0			0		0			0		0			0
	0			0		0			0		0			0		0			0		0			0
	0			0		0			0		0			0		0			0		0			0
	0			0		0			0		0			0		0			0		0			0
	0			0		0			0		0			0		0			0		0			0
	0			0		0			0		0			0		0			0		0			0
	0			0		0			0		0			0		0			0		0			0
	0			0		0			0		0			0		0			0		0			0
	0			0		0			0		0			0		0			0		0			0
	0			0		0			0		0			0		0			0		0			0
	0			0		0			0		0			0		0			0		0			0
	0			0		0			0		0			0		0			0		0			0
	0			0		0			0		0			0		0			0		0			0
	0			0		0			0		0			0		0			0		0			0
	0			0		0			0		0			0		0			0		0			0
	0			0		0			0		0			0		0			0		0			0
	0			0		0			0		0			0		0			0		0			0
	0			0		0			0		0			0		0			0		0			0
	0			0		0			0		0			0		0			0		0			0
	0			0		0			0		0			0		0			0		0			0
	0			0		0			0		0			0		0			0		0			0
	0			0		0			0		0			0		0			0		0			0
	0			0		0			0		0			0		0			0		0			0
	0			0		0			0		0			0		0			0		0			0
	0			0		0			0		0			0		0			0		0			0
	0			0		0			0		0			0		0			0		0			0
	0			0		0			0		0			0		0			0		0			0
	0			0		0			0		0			0		0			0		0			0
	0			0		0			0		0			0		0			0		0			0
	0			0		0			0		0			0		0			0		0			0
	0			0		0			0		0			0		0			0		0			0
	0			0		0			0		0			0		0			0		0			0
	0			0		0			0		0			0		0			0		0			0
	0			0		0			0		0			0		0			0		0			0
	0			0		0			0		0			0		0			0		0			0
	0			0		0			0		0			0		0			0		0			0
	0			0		0			0		0			0		0			0		0			0
	0			0		0			0		0			0		0			0		0			0
	0			0		0			0		0			0		0			0		0			0
	0			0		0			0		0			0		0			0		0			0
	0			0		0			0		0			0		0			0		0			0
	0			0		0			0		0			0		0			0		0			0
	0			0		0			0		0			0		0			0		0			0
	0			0		0			0		0			0		0			0		0			0
	0			0		0			0		0			0		0			0		0			0
	0			0		0			0		0			0		0			0		0			0
	0			0		0			0		0			0		0			0		0			0
	0			0		0			0		0			0		0			0		0			0
	0			0		0			0		0			0		0			0		0			0
	0			0		0			0		0			0		0			0		0			0
	0			0		0			0		0			0		0			0		0			0
	0			0		0			0		0			0		0			0		0			0
	0			0		0			0		0			0		0			0		0			0
	0			0		0			0		0			0		0			0		0			0
	0			0		0			0		0			0		0			0		0			0
	0			0		0			0		0			0		0			0		0			0
	0			0		0			0		0			0		0			0		0			0
	0			0		0			0		0			0		0			0		0			0
	0			0		0			0		0			0		0			0		0			0
	0			0		0			0		0			0		0			0		0			0
	0			0		0			0		0			0		0			0		0			0
	0			0		0			0		0			0		0			0		0			0
	0			0		0			0		0			0		0			0		0			0
	0			0		0			0		0			0		0			0		0			0
	0			0		0			0		0			0		0			0		0			0
	0			0		0			0		0			0		0			0		0			0
	0			0		0			0		0			0		0			0		0			0
	0			0		0			0		0			0		0			0		0			0
	0			0		0			0		0			0		0			0		0			0
	0			0		0			0		0			0		0			0		0			0
	0			0		0			0		0			0		0			0		0			0
	0			0		0			0		0			0		0			0		0			0
	0			0		0			0		0			0		0			0		0			0
	0			0		0			0		0			0		0			0		0			0
	0			0		0			0		0			0		0			0		0			0
	0			0		0			0		0			0		0			0		0			0
	0			0		0			0		0			0		0			0		0			0
	0			0		0			0		0			0		0			0		0			0
	0			0		0			0		0			0		0			0		0			0
	0			0		0			0		0			0		0			0		0			0
	0			0		0			0		0			0		0			0		0			0
	0			0		0			0		0			0		0			0		0			0
	0			0		0			0		0			0		0			0		0			0
	0			0		0			0		0			0		0			0		0			0
	0			0		0			0		0			0		0			0		0			0
	0			0		0			0		0			0		0			0		0			0
	0			0		0			0		0			0		0			0		0			0
	0			0		0			0		0			0		0			0		0			0
	0			0		0			0		0			0		0			0		0			0
	0			0		0			0		0			0		0			0		0			0
	0			0		0			0		0			0		0			0		0			0
	0			0		0			0		0			0		0			0		0			0
	0			0		0			0		0			0		0			0		0			0
	0			0		0			0		0			0		0			0		0			0
	0			0		0			0		0			0		0			0		0			0
	0			0		0			0		0			0		0			0		0			0
	0			0		0			0		0			0		0			0		0			0
	0			0		0			0		0			0		0			0		0			0
	0			0		0			0		0			0		0			0		0			0
	0			0		0			0		0			0		0			0		0			0
	0			0		0			0		0			0		0			0		0			0
	0			0		0			0		0			0		0			0		0			0
	0			0		0			0		0			0		0			0		0			0
	0			0		0			0		0			0		0			0		0			0
	0			0		0			0		0			0		0			0		0			0
	0			0		0			0		0			0		0			0		0			0
	0			0		0			0		0			0		0			0		0			0
	0			0		0			0		0			0		0			0		0			0
	0			0		0			0		0			0		0			0		0			0
	0			0		0			0		0			0		0			0		0			0
	0			0		0			0		0			0		0			0		0			0
	0			0		0			0		0			0		0			0		0			0
	0			0		0			0		0			0		0			0		0			0
	0			0		0			0		0			0		0			0		0			0
	0			0		0			0		0			0		0			0		0			0
	0			0		0			0		0			0		0			0		0			0
	0			0		0			0		0			0		0			0		0			0
	0			0		0			0		0			0		0			0		0			0
	0			0		0			0		0			0		0			0		0			0
	0			0		0			0		0			0		0			0		0			0
	0			0		0			0		0			0		0			0		0			0
	0			0		0			0		0			0		0			0		0			0
	0			0		0			0		0			0		0			0		0			0
	0			0		0			0		0			0		0			0		0			0
	0			0		0			0		0			0		0			0		0			0
	0			0		0			0		0			0		0			0		0			0
	0			0		0			0		0			0		0			0		0			0
	0			0		0			0		0			0		0			0		0			0
	0			0		0			0		0			0		0			0		0			0
	0			0		0			0		0			0		0			0		0			0
	0			0		0			0		0			0		0			0		0			0
	0			0		0			0		0			0		0			0		0			0
	0			0		0			0		0			0		0			0		0			0
	0			0		0			0		0			0		0			0		0			0
	0			0		0			0		0			0		0			0		0			0
	0			0		0			0		0			0		0			0		0			0
	0			0		0			0		0			0		0			0		0			0
	0			0		0			0		0			0		0			0		0			0
	0			0		0			0		0			0		0			0		0			0
	0			0		0			0		0			0		0			0		0			0
	0			0		0			0		0			0		0			0		0			0
	0			0		0			0		0			0		0			0		0			0
	0			0		0			0		0			0		0			0		0			0
	0			0		0			0		0			0		0			0		0			0
	0			0		0			0		0			0		0			0		0			0
	0			0		0			0		0			0		0			0		0			0
	0			0		0			0		0			0		0			0		0			0
	0			0		0			0		0			0		0			0		0			0
	0			0		0			0		0			0		0			0		0			0
	0			0		0			0		0			0		0			0		0			0
	0			0		0			0		0			0		0			0		0			0
	0			0		0			0		0			0		0			0		0			0
	0			0		0			0		0			0		0			0		0			0
	0			0		0			0		0			0		0			0		0			0
	0			0		0			0		0			0		0			0		0			0
	0			0		0			0		0			0		0			0		0			0
	0			0		0			0		0			0		0			0		0			0
	0			0		0			0		0			0		0			0		0			0
	0			0		0			0		0			0		0			0		0			0
	0			0		0			0		0			0		0			0		0			0
	0			0		0			0		0			0		0			0		0			0
	0			0		0			0		0			0		0			0		0			0
	0			0		0			0		0			0		0			0		0			0
	0			0		0			0		0			0		0			0		0			0
	0			0		0			0		0			0		0			0		0			0
	0			0		0			0		0			0		0			0		0			0
	0			0		0			0		0			0		0			0		0			0
	0			0		0			0		0			0		0			0		0			0
	0			0		0			0		0			0		0			0		0			0
	0			0		0			0		0			0		0			0		0			0
	0			0		0			0		0			0		0			0		0			0
	0			0		0			0		0			0		0			0		0			0
	0			0		0			0		0			0		0			0		0			0
	0			0		0			0		0			0		0			0		0			0
	0			0		0			0		0			0		0			0		0			0
	0			0		0			0		0			0		0			0		0			0
	0			0		0			0		0			0		0			0		0			0
	0			0		0			0		0			0		0			0		0			0
	0			0		0			0		0			0		0			0		0			0
	0			0		0			0		0			0		0			0		0			0
	0			0		0			0		0			0		0			0		0			0
	0			0		0			0		0			0		0			0		0			0
	0			0		0			0		0			0		0			0		0			0
	0			0		0			0		0			0		0			0		0			0
	0			0		0			0		0			0		0			0		0			0
	0			0		0			0		0			0		0			0		0			0
	0			0		0			0		0			0		0			0		0			0
	0			0		0			0		0			0		0			0		0			0
	0			0		0			0		0			0		0			0		0			0
	0			0		0			0		0			0		0			0		0			0
	0			0		0			0		0			0		0			0		0			0
	0			0		0			0		0			0		0			0		0			0
	0			0		0			0		0			0		0			0		0			0
	0			0		0			0		0			0		0			0		0			0
	0			0		0			0		0			0		0			0		0			0
	0			0		0			0		0			0		0			0		0			0
	0			0		0			0		0			0		0			0		0			0
	0			0		0			0		0			0		0			0		0			0
	0			0		0			0		0			0		0			0		0			0
	0			0		0			0		0			0		0			0		0			0
	0			0		0			0		0			0		0			0		0			0
	0			0		0			0		0			0		0			0		0			0
	0			0		0			0		0			0		0			0		0			0
	0			0		0			0		0			0		0			0		0			0
	0			0		0			0		0			0		0			0		0			0
	0			0		0			0		0			0		0			0		0			0
	0			0		0			0		0			0		0			0		0			0
	0			0		0			0		0			0		0			0		0			0
	0			0		0			0		0			0		0			0		0			0
	0			0		0			0		0			0		0			0		0			0
	0			0		0			0		0			0		0			0		0			0
	0			0		0			0		0			0		0			0		0			0
	0			0		0			0		0			0		0			0		0			0
	0			0		0			0		0			0		0			0		0			0
	0			0		0			0		0			0		0			0		0			0
	0			0		0			0		0			0		0			0		0			0
	0			0		0			0		0			0		0			0		0			0
	0			0		0			0		0			0		0			0		0			0
	0			0		0			0		0			0		0			0		0			0
	0			0		0			0		0			0		0			0		0			0
	0			0		0			0		0			0		0			0		0			0
	0			0		0			0		0			0		0			0		0			0
	0			0		0			0		0			0		0			0		0			0
	0			0		0			0		0			0		0			0		0			0
	0			0		0			0		0			0		0			0		0			0
	0			0		0			0		0			0		0			0		0			0
	0			0		0			0		0			0		0			0		0			0
	0			0		0			0		0			0		0			0		0			0
	0			0		0			0		0			0		0			0		0			0
	0			0		0			0		0			0		0			0		0			0
	0			0		0			0		0			0		0			0		0			0
	0			0		0			0		0			0		0			0		0			0
	0			0		0			0		0			0		0			0		0			0
	0			0		0			0		0			0		0			0		0			0
	0			0		0			0		0			0		0			0		0			0
	0			0		0			0		0			0		0			0		0			0
	0			0		0			0		0			0		0			0		0			0
	0			0		0			0		0			0		0			0		0			0
	0			0		0			0		0			0		0			0		0			0
	0			0		0			0		0			0		0			0		0			0
	0			0		0			0		0			0		0			0		0			0
	0			0		0			0		0			0		0			0		0			0
	0			0		0			0		0			0		0			0		0			0
	0			0		0			0		0			0		0			0		0			0
	0			0		0			0		0			0		0			0		0			0
	0			0		0			0		0			0		0			0		0			0
	0			0		0			0		0			0		0			0		0			0
	0			0		0			0		0			0		0			0		0			0
	0			0		0			0		0			0		0			0		0			0
	0			0		0			0		0			0		0			0		0			0
	0			0		0			0		0			0		0			0		0			0
	0			0		0			0		0			0		0			0		0			0
	0			0		0			0		0			0		0			0		0			0
	0			0		0			0		0			0		0			0		0			0
	0			0		0			0		0			0		0			0		0			0
	0			0		0			0		0			0		0			0		0			0
	0			0		0			0		0			0		0			0		0			0
	0			0		0			0		0			0		0			0		0			0
	0			0		0			0		0			0		0			0		0			0
	0			0		0			0		0			0		0			0		0			0
	0			0		0			0		0			0		0			0		0			0
	0			0		0			0		0			0		0			0		0			0
	0			0		0			0		0			0		0			0		0			0
	0			0		0			0		0			0		0			0		0			0
	0			0		0			0		0			0		0			0		0			0
	0			0		0			0		0			0		0			0		0			0
	0			0		0			0		0			0		0			0		0			0
	0			0		0			0		0			0		0			0		0			0
	0			0		0			0		0			0		0			0		0			0

## Sheet: raw data_prim T cell DMSO
		prim T cell cell3-1 full AB DMSO lamellipodium spot_1					prim T cell cell3-1 full AB DMSO lamellipodium spot_2					prim T cell cell3-1 full AB DMSO lamellipodium spot_3					prim T cell cell3-1 full AB DMSO lamellipodium spot_4					prim T cell cell3-1 full AB DMSO lamellipodium spot_5
		Average	280.359				Average	220.732				Average	292.33				Average	290.156				Average	200.666
		StDev	82.2088				StDev	59.5234				StDev	63.4578				StDev	64.0062				StDev	91.6852
				setp					setp					setp					setp					setp
		kPa	%				kPa	%				kPa	%				kPa	%				kPa	%
	0	0	1.78571	1403.59		0	0	3.33333	1624.08		0	0	1.23457	1055.02		0	0	1.5625	1315.48		0	0	4	1610.67
	0	0.953196	0	0		0	0.611332	0	0		0	0.800363	0	0		0	0.800363	0	0		0	0.671661	0	0
	0	1.90639	0	0		0	1.22266	0	0		0	1.60072	0	0		0	1.60072	0	0		0	1.34332	0	0
	0	2.85959	0	0		0	1.834	0	0		0	2.40109	0	0		0	2.40109	0	0		0	2.01498	0	0
	0	3.81278	0	0		0	2.44533	0	0		0	3.20145	0	0		0	3.20145	0	0		0	2.68664	0	0
	0	4.76598	0	0		0	3.05666	0	0		0	4.00181	0	0		0	4.00181	0	0		0	3.35831	0	0
	0	5.71917	0	0		0	3.66799	0	0		0	4.80218	0	0		0	4.80218	0	0		0	4.02997	0	0
	0	6.67237	0	0		0	4.27933	0	0		0	5.60254	0	0		0	5.60254	0	0		0	4.70163	0	0
	0	7.62556	0	0		0	4.89066	0	0		0	6.4029	0	0		0	6.4029	0	0		0	5.37329	0	0
	0	8.57876	0	0		0	5.50199	0	0		0	7.20326	0	0		0	7.20326	0	0		0	6.04495	0	0
	0	9.53196	0	0		0	6.11332	0	0		0	8.00363	0	0		0	8.00363	0	0		0	6.71661	0	0
	0	10.4852	0	0		0	6.72466	0	0		0	8.80399	0	0		0	8.80399	0	0		0	7.38827	0	0
	0	11.4383	0	0		0	7.33599	0	0		0	9.60435	0	0		0	9.60435	0	0		0	8.05993	0	0
	0	12.3915	0	0		0	7.94732	0	0		0	10.4047	0	0		0	10.4047	0	0		0	8.73159	0	0
	0	13.3447	0	0		0	8.55865	0	0		0	11.2051	0	0		0	11.2051	0	0		0	9.40325	0	0
	0	14.2979	0	0		0	9.16998	0	0		0	12.0054	0	0		0	12.0054	0	0		0	10.0749	0	0
	0	15.2511	0	0		0	9.78132	0	0		0	12.8058	0	0		0	12.8058	0	0		0	10.7466	0	0
	0	16.2043	0	0		0	10.3926	0	0		0	13.6062	0	0		0	13.6062	0	0		0	11.4182	0	0
	0	17.1575	0	0		0	11.004	0	0		0	14.4065	0	0		0	14.4065	0	0		0	12.0899	0	0
	0	18.1107	0	0		0	11.6153	0	0		0	15.2069	0	0		0	15.2069	0	0		0	12.7616	0	0
	0	19.0639	0	0		0	12.2266	0	0		0	16.0072	0	0		0	16.0072	0	0		0	13.4332	0	0
	0	20.0171	0	0		0	12.838	0	0		0	16.8076	0	0		0	16.8076	0	0		0	14.1049	0	0
	0	20.9703	0	0		0	13.4493	0	0		0	17.608	0	0		0	17.608	0	0		0	14.7765	0	0
	0	21.9235	0	0		0	14.0606	0	0		0	18.4083	0	0		0	18.4083	0	0		0	15.4482	0	0
	0	22.8767	0	0		0	14.672	0	0		0	19.2087	0	0		0	19.2087	0	0		0	16.1199	0	0
	0	23.8299	0	0		0	15.2833	0	0		0	20.0091	0	0		0	20.0091	0	0		0	16.7915	0	0
	0	24.7831	0	0		0	15.8946	0	0		0	20.8094	0	0		0	20.8094	0	0		0	17.4632	0	0
	0	25.7363	0	0		0	16.506	0	0		0	21.6098	0	0		0	21.6098	0	0		0	18.1349	0	0
	0	26.6895	0	0		0	17.1173	0	0		0	22.4102	0	0		0	22.4102	0	0		0	18.8065	0	0
	0	27.6427	0	0		0	17.7286	0	0		0	23.2105	0	0		0	23.2105	0	0		0	19.4782	0	0
	0	28.5959	0	0		0	18.34	0	0		0	24.0109	0	0		0	24.0109	0	0		0	20.1498	0	0
	0	29.5491	0	0		0	18.9513	0	0		0	24.8112	0	0		0	24.8112	0	0		0	20.8215	0	0
	0	30.5023	0	0		0	19.5626	0	0		0	25.6116	0	0		0	25.6116	0	0		0	21.4931	0	0
	0	31.4555	0	0		0	20.174	0	0		0	26.412	0	0		0	26.412	0	0		0	22.1648	0	0
	0	32.4087	0	0		0	20.7853	0	0		0	27.2123	0	0		0	27.2123	0	0		0	22.8365	0	0
	0	33.3618	0	0		0	21.3966	0	0		0	28.0127	0	0		0	28.0127	0	0		0	23.5081	0	0
	0	34.315	0	0		0	22.008	0	0		0	28.8131	0	0		0	28.8131	0	0		0	24.1798	0	0
	0	35.2682	0	0		0	22.6193	0	0		0	29.6134	0	0		0	29.6134	0	0		0	24.8515	0	0
	0	36.2214	0	0		0	23.2306	0	0		0	30.4138	0	0		0	30.4138	0	0		0	25.5231	0	0
	0	37.1746	0	0		0	23.842	0	0		0	31.2141	0	0		0	31.2141	0	0		0	26.1948	0	0
	0	38.1278	0	0		0	24.4533	0	0		0	32.0145	0	0		0	32.0145	0	0		0	26.8664	0	0
	0	39.081	0	0		0	25.0646	0	0		0	32.8149	0	0		0	32.8149	0	0		0	27.5381	0	0
	0	40.0342	0	0		0	25.676	0	0		0	33.6152	0	0		0	33.6152	0	0		0	28.2098	0	0
	0	40.9874	0	0		0	26.2873	0	0		0	34.4156	0	0		0	34.4156	0	0		0	28.8814	0	0
	0	41.9406	0	0		0	26.8986	0	0		0	35.216	0	0		0	35.216	0	0		0	29.5531	0	0
	0	42.8938	0	0		0	27.5099	0	0		0	36.0163	0	0		0	36.0163	0	0		0	30.2248	0	0
	0	43.847	0	0		0	28.1213	0	0		0	36.8167	0	0		0	36.8167	0	0		0	30.8964	0	0
	0	44.8002	0	0		0	28.7326	0	0		0	37.617	0	0		0	37.617	0	0		0	31.5681	0	0
	0	45.7534	0	0		0	29.3439	0	0		0	38.4174	0	0		0	38.4174	0	0		0	32.2397	0	0
	0	46.7066	0	0		0	29.9553	0	0		0	39.2178	0	0		0	39.2178	0	0		0	32.9114	0	0
	0	47.6598	0	0		0	30.5666	0	0		0	40.0181	0	0		0	40.0181	0	0		0	33.5831	0	0
	0	48.613	0	0		0	31.1779	0	0		0	40.8185	0	0		0	40.8185	0	0		0	34.2547	0	0
	0	49.5662	0	0		0	31.7893	0	0		0	41.6189	0	0		0	41.6189	0	0		0	34.9264	0	0
	0	50.5194	0	0		0	32.4006	0	0		0	42.4192	0	0		0	42.4192	0	0		0	35.598	0	0
	0	51.4726	0	0		0	33.0119	0	0		0	43.2196	0	0		0	43.2196	0	0		0	36.2697	0	0
	0	52.4258	0	0		0	33.6233	0	0		0	44.02	0	0		0	44.02	0	0		0	36.9414	0	0
	0	53.379	0	0		0	34.2346	0	0		0	44.8203	0	0		0	44.8203	0	0		0	37.613	0	0
	0	54.3321	0	0		0	34.8459	0	0		0	45.6207	0	0		0	45.6207	0	0		0	38.2847	0	0
	0	55.2854	0	0		0	35.4573	0	0		0	46.421	0	0		0	46.421	0	0		0	38.9563	0	0
	0	56.2385	0	0		0	36.0686	0	0		0	47.2214	0	0		0	47.2214	0	0		0	39.628	0	0
	0	57.1917	0	0		0	36.6799	0	0		0	48.0218	0	0		0	48.0218	0	0		0	40.2997	0	0
	0	58.1449	0	0		0	37.2913	0	0		0	48.8221	0	0		0	48.8221	0	0		1.63885	40.9713	4	1020.1
	0	59.0981	0	0		0	37.9026	0	0		0	49.6225	0	0		0	49.6225	0	0		0	41.643	0	0
	0	60.0513	0	0		0	38.5139	0	0		0	50.4228	0	0		0	50.4228	0	0		0	42.3146	0	0
	0	61.0045	0	0		0	39.1253	0	0		0	51.2232	0	0		0	51.2232	0	0		0	42.9863	0	0
	0	61.9577	0	0		0	39.7366	0	0		0	52.0236	0	0		0	52.0236	0	0		0	43.658	0	0
	0	62.9109	0	0		0	40.3479	0	0		0	52.8239	0	0		0	52.8239	0	0		0	44.3296	0	0
	0	63.8641	0	0		0	40.9593	0	0		0	53.6243	0	0		0	53.6243	0	0		0	45.0013	0	0
	0	64.8173	0	0		0	41.5706	0	0		0	54.4247	0	0		0	54.4247	0	0		0	45.673	0	0
	0	65.7705	0	0		0	42.1819	0	0		0	55.225	0	0		0	55.225	0	0		0	46.3446	0	0
	0	66.7237	0	0		0	42.7933	0	0		0	56.0254	0	0		0	56.0254	0	0		0	47.0163	0	0
	0	67.6769	0	0		0	43.4046	0	0		0	56.8257	0	0		0	56.8257	0	0		0	47.6879	0	0
	0	68.6301	0	0		0	44.0159	0	0		0	57.6261	0	0		0	57.6261	0	0		0	48.3596	0	0
	0	69.5833	0	0		0	44.6272	0	0		0	58.4265	0	0		0	58.4265	0	0		1.96125	49.0313	4	919.724
	0	70.5365	0	0		0	45.2386	0	0		0	59.2268	0	0		0	59.2268	0	0		0	49.7029	0	0
	0	71.4897	0	0		0	45.8499	0	0		0	60.0272	0	0		0	60.0272	0	0		0	50.3746	0	0
	0	72.4429	0	0		0	46.4612	0	0		0	60.8276	0	0		0	60.8276	0	0		0	51.0462	0	0
	0	73.3961	0	0		0	47.0726	0	0		0	61.6279	0	0		0	61.6279	0	0		0	51.7179	0	0
	0	74.3493	0	0		0	47.6839	0	0		0	62.4283	0	0		0	62.4283	0	0		0	52.3896	0	0
	0	75.3025	0	0		0	48.2953	0	0		0	63.2287	0	0		0	63.2287	0	0		0	53.0612	0	0
	0	76.2557	0	0		0	48.9066	0	0		0	64.029	0	0		0	64.029	0	0		0	53.7329	0	0
	0	77.2088	0	0		0	49.5179	0	0		0	64.8294	0	0		0	64.8294	0	0		0	54.4046	0	0
	0	78.162	0	0		0	50.1292	0	0		0	65.6297	0	0		0	65.6297	0	0		0	55.0762	0	0
	0	79.1152	0	0		0	50.7406	0	0		0	66.4301	0	0		0	66.4301	0	0		0	55.7479	0	0
	0	80.0684	0	0		0	51.3519	0	0		0	67.2305	0	0		0	67.2305	0	0		0	56.4195	0	0
	0	81.0216	0	0		0	51.9632	0	0		0	68.0308	0	0		0	68.0308	0	0		0	57.0912	0	0
	0	81.9748	0	0		0	52.5746	0	0		0	68.8312	0	0		0	68.8312	0	0		2.31051	57.7629	4	816.852
	0	82.928	0	0		0	53.1859	0	0		0	69.6316	0	0		0	69.6316	0	0		0	58.4345	0	0
	0	83.8812	0	0		0	53.7972	0	0		0	70.4319	0	0		0	70.4319	0	0		0	59.1062	0	0
	0	84.8344	0	0		0	54.4086	0	0		0	71.2323	0	0		0	71.2323	0	0		0	59.7778	0	0
	0	85.7876	0	0		0	55.0199	0	0		0	72.0326	0	0		0	72.0326	0	0		0	60.4495	0	0
	0	86.7408	0	0		0	55.6312	0	0		0	72.833	0	0		0	72.833	0	0		0	61.1212	0	0
	0	87.694	0	0		0	56.2426	0	0		0	73.6334	0	0		0	73.6334	0	0		0	61.7928	0	0
	0	88.6472	0	0		0	56.8539	0	0		0	74.4337	0	0		0	74.4337	0	0		0	62.4645	0	0
	0	89.6004	0	0		0	57.4652	0	0		0	75.2341	0	0		0	75.2341	0	0		0	63.1361	0	0
	0	90.5536	0	0		0	58.0766	0	0		0	76.0345	0	0		0	76.0345	0	0		0	63.8078	0	0
	0	91.5068	0	0		0	58.6879	0	0		0	76.8348	0	0		0	76.8348	0	0		0	64.4795	0	0
	0	92.46	0	0		0	59.2992	0	0		0	77.6352	0	0		0	77.6352	0	0		0	65.1511	0	0
	0	93.4132	0	0		0	59.9106	0	0		0	78.4355	0	0		0	78.4355	0	0		0	78.4355	0	0
	0	94.3664	0	0		0	60.5219	0	0		0	79.2359	0	0		0	79.2359	0	0		0	79.2359	0	0
	0	95.3196	0	0		0	61.1332	0	0		0	80.0363	0	0		0	80.0363	0	0		0	80.0363	0	0
	0	96.2728	0	0		0	61.7446	0	0		0	80.8366	0	0		0	80.8366	0	0		0	80.8366	0	0
	0	97.226	0	0		0	62.3559	0	0		0	81.637	0	0		0	81.637	0	0		0	81.637	0	0
	0	98.1792	0	0		0	62.9672	0	0		0	82.4373	0	0		0	82.4373	0	0		0	82.4373	0	0
	0	99.1324	0	0		0	63.5785	0	0		0	83.2377	0	0		0	83.2377	0	0		0	83.2377	0	0
	0	100.085	0	0		0	64.1899	0	0		0	84.0381	0	0		0	84.0381	0	0		0	84.0381	0	0
	0	101.039	0	0		0	64.8012	0	0		0	84.8384	0	0		0	84.8384	0	0		0	84.8384	0	0
	0	101.992	0	0		0	65.4125	0	0		0	85.6388	0	0		0	85.6388	0	0		0	85.6388	0	0
	1.83831	102.945	1.78571	562.064		0	66.0239	0	0		0	86.4392	0	0		0	86.4392	0	0		0	86.4392	0	0
	0	103.898	0	0		0	66.6352	0	0		0	87.2395	0	0		0	87.2395	0	0		0	87.2395	0	0
	0	104.852	0	0		0	67.2465	0	0		0	88.0399	0	0		0	88.0399	0	0		0	88.0399	0	0
	0	105.805	0	0		0	67.8579	0	0		0	88.8402	0	0		0	88.8402	0	0		0	88.8402	0	0
	0	106.758	0	0		0	68.4692	0	0		0	89.6406	0	0		0	89.6406	0	0		0	89.6406	0	0
	0	107.711	0	0		0	69.0806	0	0		0	90.441	0	0		0	90.441	0	0		0	90.441	0	0
	0	108.664	0	0		0	69.6919	0	0		0	91.2413	0	0		0	91.2413	0	0		0	91.2413	0	0
	0	109.618	0	0		0	70.3032	0	0		0	92.0417	0	0		0	92.0417	0	0		0	92.0417	0	0
	0	110.571	0	0		0	70.9146	0	0		0	92.8421	0	0		0	92.8421	0	0		0	92.8421	0	0
	0	111.524	0	0		0	71.5259	0	0		0	93.6424	0	0		0	93.6424	0	0		0	93.6424	0	0
	0	112.477	0	0		0	72.1372	0	0		0	94.4428	0	0		0	94.4428	0	0		0	94.4428	0	0
	0	113.43	0	0		0	72.7485	0	0		0	95.2431	0	0		0	95.2431	0	0		0	95.2431	0	0
	0	114.383	0	0		0	73.3599	0	0		0	96.0435	0	0		0	96.0435	0	0		0	96.0435	0	0
	0	115.337	0	0		0	73.9712	0	0		0	96.8439	0	0		0	96.8439	0	0		0	96.8439	0	0
	0	116.29	0	0		0	74.5825	0	0		0	97.6442	0	0		0	97.6442	0	0		0	97.6442	0	0
	0	117.243	0	0		0	75.1939	0	0		0	98.4446	0	0		0	98.4446	0	0		0	98.4446	0	0
	0	118.196	0	0		0	75.8052	0	0		0	99.245	0	0		0	99.245	0	0		0	99.245	0	0
	0	119.15	0	0		0	76.4165	0	0		0	100.045	0	0		0	100.045	0	0		0	100.045	0	0
	0	120.103	0	0		0	77.0279	0	0		0	100.846	0	0		0	100.846	0	0		0	100.846	0	0
	0	121.056	0	0		0	77.6392	0	0		0	101.646	0	0		0	101.646	0	0		0	101.646	0	0
	0	122.009	0	0		0	78.2505	0	0		0	102.446	0	0		0	102.446	0	0		0	102.446	0	0
	0	122.962	0	0		0	78.8619	0	0		0	103.247	0	0		0	103.247	0	0		0	103.247	0	0
	0	123.915	0	0		0	79.4732	0	0		0	104.047	0	0		0	104.047	0	0		0	104.047	0	0
	0	124.869	0	0		0	80.0845	0	0		0	104.847	0	0		0	104.847	0	0		0	104.847	0	0
	0	125.822	0	0		0	80.6959	0	0		0	105.648	0	0		0	105.648	0	0		0	105.648	0	0
	0	126.775	0	0		0	81.3072	0	0		0	106.448	0	0		0	106.448	0	0		0	106.448	0	0
	0	127.728	0	0		0	81.9185	0	0		0	107.249	0	0		0	107.249	0	0		0	107.249	0	0
	0	128.681	0	0		0	82.5299	0	0		0	108.049	0	0		0	108.049	0	0		0	108.049	0	0
	0	129.635	0	0		0	83.1412	0	0		0	108.849	0	0		0	108.849	0	0		0	108.849	0	0
	0	130.588	0	0		0	83.7525	0	0		0	109.65	0	0		0	109.65	0	0		0	109.65	0	0
	0	131.541	0	0		0	84.3638	0	0		0	110.45	0	0		0	110.45	0	0		0	110.45	0	0
	0	132.494	0	0		0	84.9752	0	0		0	111.25	0	0		0	111.25	0	0		0	111.25	0	0
	0	133.447	0	0		0	85.5865	0	0		0	112.051	0	0		0	112.051	0	0		0	112.051	0	0
	0	134.401	0	0		0	86.1979	0	0		0	112.851	0	0		0	112.851	0	0		0	112.851	0	0
	0	135.354	0	0		0	86.8092	0	0		0	113.651	0	0		0	113.651	0	0		0	113.651	0	0
	0	136.307	0	0		0	87.4205	0	0		0	114.452	0	0		0	114.452	0	0		0	114.452	0	0
	0	137.26	0	0		0	88.0318	0	0		0	115.252	0	0		0	115.252	0	0		0	115.252	0	0
	0	138.213	0	0		0	88.6432	0	0		0	116.053	0	0		0	116.053	0	0		0	116.053	0	0
	0	139.167	0	0		0	89.2545	0	0		0	116.853	0	0		0	116.853	0	0		0	116.853	0	0
	0	140.12	0	0		0	89.8658	0	0		0	117.653	0	0		0	117.653	0	0		0	117.653	0	0
	0	141.073	0	0		0	90.4772	0	0		0	118.454	0	0		0	118.454	0	0		0	118.454	0	0
	2.53618	142.026	1.78571	341.712		0	91.0885	0	0		0	119.254	0	0		0	119.254	0	0		0	119.254	0	0
	0	142.979	0	0		0	91.6998	0	0		0	120.054	0	0		0	120.054	0	0		0	120.054	0	0
	0	143.933	0	0		0	92.3112	0	0		0	120.855	0	0		0	120.855	0	0		0	120.855	0	0
	0	144.886	0	0		0	92.9225	0	0		0	121.655	0	0		0	121.655	0	0		0	121.655	0	0
	0	145.839	0	0		0	93.5338	0	0		0	122.456	0	0		0	122.456	0	0		0	122.456	0	0
	0	146.792	0	0		0	94.1452	0	0		0	123.256	0	0		0	123.256	0	0		0	123.256	0	0
	0	147.745	0	0		0	94.7565	0	0		0	124.056	0	0		0	124.056	0	0		0	124.056	0	0
	0	148.698	0	0		0	95.3678	0	0		0	124.857	0	0		0	124.857	0	0		0	124.857	0	0
	0	149.652	0	0		0	95.9792	0	0		0	125.657	0	0		0	125.657	0	0		0	125.657	0	0
	0	150.605	0	0		0	96.5905	0	0		0	126.457	0	0		0	126.457	0	0		0	126.457	0	0
	0	151.558	0	0		0	97.2018	0	0		0	127.258	0	0		0	127.258	0	0		0	127.258	0	0
	0	152.511	0	0		0	97.8132	0	0		0	128.058	0	0		0	128.058	0	0		0	128.058	0	0
	0	153.464	0	0		0	98.4245	0	0		0	128.858	0	0		0	128.858	0	0		0	128.858	0	0
	0	154.418	0	0		0	99.0358	0	0		0	129.659	0	0		0	129.659	0	0		0	129.659	0	0
	0	155.371	0	0		0	99.6472	0	0		0	130.459	0	0		0	130.459	0	0		0	130.459	0	0
	0	156.324	0	0		0	100.258	0	0		0	131.26	0	0		0	131.26	0	0		0	131.26	0	0
	0	157.277	0	0		0	100.87	0	0		0	132.06	0	0		0	132.06	0	0		0	132.06	0	0
	0	158.231	0	0		0	101.481	0	0		0	132.86	0	0		0	132.86	0	0		0	132.86	0	0
	0	159.184	0	0		0	102.093	0	0		0	133.661	0	0		0	133.661	0	0		0	133.661	0	0
	0	160.137	0	0		0	102.704	0	0		0	134.461	0	0		0	134.461	0	0		0	134.461	0	0
	0	161.09	0	0		0	103.315	0	0		0	135.261	0	0		0	135.261	0	0		0	135.261	0	0
	0	162.043	0	0		0	103.927	0	0		0	136.062	0	0		0	136.062	0	0		0	136.062	0	0
	0	162.996	0	0		0	104.538	0	0		0	136.862	0	0		0	136.862	0	0		0	136.862	0	0
	0	163.95	0	0		0	105.149	0	0		0	137.662	0	0		0	137.662	0	0		0	137.662	0	0
	0	164.903	0	0		0	105.76	0	0		0	138.463	0	0		0	138.463	0	0		0	138.463	0	0
	0	165.856	0	0		0	106.372	0	0		0	139.263	0	0		0	139.263	0	0		0	139.263	0	0
	0	166.809	0	0		0	106.983	0	0		0	140.064	0	0		0	140.064	0	0		0	140.064	0	0
	0	167.762	0	0		0	107.594	0	0		0	140.864	0	0		0	140.864	0	0		0	140.864	0	0
	0	168.716	0	0		0	108.206	0	0		0	141.664	0	0		0	141.664	0	0		0	141.664	0	0
	0	169.669	0	0		0	108.817	0	0		0	142.464	0	0		0	142.464	0	0		0	142.464	0	0
	0	170.622	0	0		0	109.428	0	0		0	143.265	0	0		0	143.265	0	0		0	143.265	0	0
	0	171.575	0	0		0	110.04	0	0		0	144.065	0	0		0	144.065	0	0		0	144.065	0	0
	0	172.528	0	0		0	110.651	0	0		0	144.866	0	0		0	144.866	0	0		0	144.866	0	0
	0	173.482	0	0		0	111.263	0	0		0	145.666	0	0		0	145.666	0	0		0	145.666	0	0
	0	174.435	0	0		0	111.874	0	0		0	146.466	0	0		0	146.466	0	0		0	146.466	0	0
	0	175.388	0	0		0	112.485	0	0		0	147.267	0	0		0	147.267	0	0		0	147.267	0	0
	0	176.341	0	0		0	113.097	0	0		0	148.067	0	0		0	148.067	0	0		0	148.067	0	0
	0	177.294	0	0		0	113.708	0	0		0	148.867	0	0		0	148.867	0	0		0	148.867	0	0
	0	178.248	0	0		0	114.319	0	0		0	149.668	0	0		0	149.668	0	0		0	149.668	0	0
	0	179.201	0	0		0	114.93	0	0		0	150.468	0	0		0	150.468	0	0		0	150.468	0	0
	0	180.154	0	0		0	115.542	0	0		0	151.268	0	0		0	151.268	0	0		0	151.268	0	0
	0	181.107	0	0		0	116.153	0	0		0	152.069	0	0		0	152.069	0	0		0	152.069	0	0
	0	182.06	0	0		0	116.764	0	0		0	152.869	0	0		0	152.869	0	0		0	152.869	0	0
	0	183.014	0	0		0	117.376	0	0		0	153.67	0	0		0	153.67	0	0		0	153.67	0	0
	0	183.967	0	0		0	117.987	0	0		0	154.47	0	0		0	154.47	0	0		0	154.47	0	0
	0	184.92	0	0		0	118.599	0	0		0	155.27	0	0		0	155.27	0	0		0	155.27	0	0
	0	185.873	0	0		0	119.21	0	0		0	156.071	0	0		0	156.071	0	0		0	156.071	0	0
	3.33618	186.826	1.78571	156.22		0	119.821	0	0		0	156.871	0	0		0	156.871	0	0		0	156.871	0	0
	0	187.78	0	0		0	120.433	0	0		0	157.671	0	0		0	157.671	0	0		0	157.671	0	0
	0	188.733	0	0		0	121.044	0	0		0	158.472	0	0		0	158.472	0	0		0	158.472	0	0
	0	189.686	0	0		0	121.655	0	0		0	159.272	0	0		0	159.272	0	0		0	159.272	0	0
	0	190.639	0	0		0	122.266	0	0		0	160.072	0	0		0	160.072	0	0		0	160.072	0	0
	0	191.592	0	0		0	122.878	0	0		0	160.873	0	0		0	160.873	0	0		0	160.873	0	0
	0	192.546	0	0		0	123.489	0	0		0	161.673	0	0		0	161.673	0	0		0	161.673	0	0
	0	193.499	0	0		0	124.1	0	0		2.00585	162.474	1.23457	208.181		2.53865	162.474	1.5625	254.733		2.00585	162.474	1.23457	18.0081
	0	194.452	0	0		0	124.712	0	0		0	163.274	0	0		0	163.274	0	0		0	163.274	0	0
	0	195.405	0	0		0	125.323	0	0		0	164.074	0	0		0	164.074	0	0		0	164.074	0	0
	0	196.358	0	0		0	125.934	0	0		0	164.875	0	0		0	164.875	0	0		0	164.875	0	0
	0	197.311	0	0		0	126.546	0	0		0	165.675	0	0		0	165.675	0	0		0	165.675	0	0
	0	198.265	0	0		0	127.157	0	0		0	166.475	0	0		0	166.475	0	0		0	166.475	0	0
	0	199.218	0	0		0	127.768	0	0		0	167.276	0	0		0	167.276	0	0		0	167.276	0	0
	0	200.171	0	0		0	128.38	0	0		0	168.076	0	0		0	168.076	0	0		0	168.076	0	0
	0	201.124	0	0		0	128.991	0	0		0	168.876	0	0		0	168.876	0	0		0	168.876	0	0
	0	202.077	0	0		0	129.602	0	0		0	169.677	0	0		0	169.677	0	0		0	169.677	0	0
	0	203.031	0	0		0	130.214	0	0		0	170.477	0	0		0	170.477	0	0		0	170.477	0	0
	0	203.984	0	0		0	130.825	0	0		0	171.278	0	0		0	171.278	0	0		0	171.278	0	0
	0	204.937	0	0		0	131.436	0	0		0	172.078	0	0		0	172.078	0	0		0	172.078	0	0
	3.67661	205.89	1.78571	99.0274		0	132.048	0	0		0	172.878	0	0		0	172.878	0	0		0	172.878	0	0
	0	206.844	0	0		0	132.659	0	0		0	173.679	0	0		0	173.679	0	0		0	173.679	0	0
	0	207.797	0	0		0	133.27	0	0		2.15406	174.479	1.23457	171.467		2.72623	174.479	1.5625	209.082		2.15406	174.479	1.23457	8.46616
	0	208.75	0	0		0	133.882	0	0		0	175.279	0	0		0	175.279	0	0		0	175.279	0	0
	3.7447	209.703	1.78571	89.1468		0	134.493	0	0		0	176.08	0	0		0	176.08	0	0		0	176.08	0	0
	0	210.656	0	0		0	135.104	0	0		0	176.88	0	0		0	176.88	0	0		0	176.88	0	0
	0	211.609	0	0		0	135.716	0	0		0	177.68	0	0		0	177.68	0	0		0	177.68	0	0
	0	212.563	0	0		0	136.327	0	0		0	178.481	0	0		0	178.481	0	0		0	178.481	0	0
	0	213.516	0	0		0	136.938	0	0		0	179.281	0	0		0	179.281	0	0		0	179.281	0	0
	0	214.469	0	0		0	137.55	0	0		0	180.082	0	0		0	180.082	0	0		0	180.082	0	0
	0	215.422	0	0		0	138.161	0	0		0	180.882	0	0		0	180.882	0	0		0	180.882	0	0
	0	216.375	0	0		0	138.772	0	0		0	181.682	0	0		0	181.682	0	0		0	181.682	0	0
	0	217.329	0	0		0	139.384	0	0		0	182.483	0	0		0	182.483	0	0		0	182.483	0	0
	0	218.282	0	0		0	139.995	0	0		0	183.283	0	0		0	183.283	0	0		0	183.283	0	0
	0	219.235	0	0		0	140.606	0	0		0	184.083	0	0		0	184.083	0	0		0	184.083	0	0
	0	220.188	0	0		0	141.218	0	0		0	184.884	0	0		0	184.884	0	0		0	184.884	0	0
	0	221.141	0	0		0	141.829	0	0		0	185.684	0	0		0	185.684	0	0		0	185.684	0	0
	7.93195	222.095	3.57143	121.239		0	142.44	0	0		0	186.484	0	0		0	186.484	0	0		0	186.484	0	0
	0	223.048	0	0		0	143.052	0	0		0	187.285	0	0		0	187.285	0	0		0	187.285	0	0
	4.00002	224.001	1.78571	56.7176		4.78877	143.663	3.33333	197.986		0	188.085	0	0		0	188.085	0	0		0	188.085	0	0
	0	224.954	0	0		0	144.274	0	0		2.33192	188.886	1.23457	132.108		2.95134	188.886	1.5625	160.247		2.33192	188.886	1.23457	1.71331
	8.06812	225.907	3.57143	105.891		0	144.886	0	0		0	189.686	0	0		0	189.686	0	0		0	189.686	0	0
	0	226.861	0	0		0	145.497	0	0		0	190.486	0	0		0	190.486	0	0		0	190.486	0	0
	4.0681	227.814	1.78571	49.3029		0	146.108	0	0		0	191.287	0	0		0	191.287	0	0		0	191.287	0	0
	0	228.767	0	0		0	146.72	0	0		0	192.087	0	0		0	192.087	0	0		0	192.087	0	0
	4.10214	229.72	1.78571	45.7904		0	147.331	0	0		0	192.887	0	0		0	192.887	0	0		0	192.887	0	0
	0	230.673	0	0		0	147.942	0	0		0	193.688	0	0		0	193.688	0	0		0	193.688	0	0
	0	231.626	0	0		0	148.554	0	0		0	194.488	0	0		0	194.488	0	0		0	194.488	0	0
	0	232.58	0	0		0	149.165	0	0		0	195.288	0	0		0	195.288	0	0		0	195.288	0	0
	0	233.533	0	0		0	149.776	0	0		0	196.089	0	0		0	196.089	0	0		0	196.089	0	0
	4.18725	234.486	1.78571	37.5766		0	150.388	0	0		0	196.889	0	0		0	196.889	0	0		0	196.889	0	0
	0	235.439	0	0		0	150.999	0	0		2.44061	197.69	1.23457	110.578		3.0889	197.69	1.5625	133.596		2.44061	197.69	1.23457	0.10937
	8.44259	236.393	3.57143	69.0365		0	151.61	0	0		0	198.49	0	0		0	198.49	0	0		0	198.49	0	0
	0	237.346	0	0		5.07406	152.222	3.33333	156.454		0	199.29	0	0		0	199.29	0	0		0	199.29	0	0
	4.25534	238.299	1.78571	31.5897		0	152.833	0	0		0	200.091	0	0		0	200.091	0	0		0	200.091	0	0
	0	239.252	0	0		0	153.444	0	0		0	200.891	0	0		0	200.891	0	0		0	200.891	0	0
	4.28938	240.205	1.78571	28.7909		0	154.056	0	0		0	201.691	0	0		0	201.691	0	0		0	201.691	0	0
	0	241.159	0	0		0	154.667	0	0		0	202.492	0	0		0	202.492	0	0		0	202.492	0	0
	0	242.112	0	0		0	155.278	0	0		0	203.292	0	0		0	203.292	0	0		0	203.292	0	0
	0	243.065	0	0		0	155.89	0	0		0	204.093	0	0		0	204.093	0	0		0	204.093	0	0
	0	244.018	0	0		0	156.501	0	0		0	204.893	0	0		0	204.893	0	0		0	204.893	0	0
	0	244.971	0	0		0	157.112	0	0		0	205.693	0	0		0	205.693	0	0		0	205.693	0	0
	0	245.924	0	0		0	157.724	0	0		0	206.494	0	0		0	206.494	0	0		0	206.494	0	0
	0	246.878	0	0		0	158.335	0	0		0	207.294	0	0		0	207.294	0	0		0	207.294	0	0
	0	247.831	0	0		0	158.946	0	0		0	208.094	0	0		0	208.094	0	0		0	208.094	0	0
	8.88515	248.784	3.57143	35.6054		0	159.558	0	0		0	208.895	0	0		0	208.895	0	0		0	208.895	0	0
	0	249.737	0	0		5.33897	160.169	3.33333	122.261		0	209.695	0	0		0	209.695	0	0		0	209.695	0	0
	0	250.69	0	0		0	160.78	0	0		0	210.495	0	0		0	210.495	0	0		0	210.495	0	0
	0	251.644	0	0		0	161.392	0	0		0	211.296	0	0		0	211.296	0	0		0	211.296	0	0
	4.51066	252.597	1.78571	13.7629		0	162.003	0	0		0	212.096	0	0		0	212.096	0	0		0	212.096	0	0
	0	253.55	0	0		0	162.614	0	0		0	212.897	0	0		0	212.897	0	0		0	212.897	0	0
	0	254.503	0	0		0	163.226	0	0		0	213.697	0	0		0	213.697	0	0		0	213.697	0	0
	0	255.456	0	0		0	163.837	0	0		0	214.497	0	0		0	214.497	0	0		0	214.497	0	0
	0	256.41	0	0		0	164.448	0	0		0	215.298	0	0		0	215.298	0	0		0	215.298	0	0
	0	257.363	0	0		0	165.06	0	0		0	216.098	0	0		0	216.098	0	0		0	216.098	0	0
	0	258.316	0	0		0	165.671	0	0		0	216.898	0	0		0	216.898	0	0		0	216.898	0	0
	9.25962	259.269	3.57143	15.8845		0	166.282	0	0		2.68764	217.699	1.23457	68.7636		3.40154	217.699	1.5625	82.0335		2.68764	217.699	1.23457	3.5816
	0	260.222	0	0		0	166.894	0	0		0	218.499	0	0		0	218.499	0	0		0	218.499	0	0
	4.66385	261.176	1.78571	6.57124		0	167.505	0	0		0	219.299	0	0		0	219.299	0	0		0	219.299	0	0
	0	262.129	0	0		0	168.116	0	0		0	220.1	0	0		0	220.1	0	0		0	220.1	0	0
	4.69789	263.082	1.78571	5.33005		5.62426	168.728	3.33333	90.1472		0	220.9	0	0		0	220.9	0	0		0	220.9	0	0
	0	264.035	0	0		0	169.339	0	0		5.47408	221.7	2.46914	123.174		3.46407	221.7	1.5625	73.2224		5.47408	221.7	2.46914	10.9246
	4.73193	264.988	1.78571	4.21865		0	169.95	0	0		0	222.501	0	0		0	222.501	0	0		0	222.501	0	0
	0	265.942	0	0		0	170.562	0	0		0	223.301	0	0		0	223.301	0	0		0	223.301	0	0
	4.76598	266.895	1.78571	3.23706		0	171.173	0	0		0	224.101	0	0		0	224.101	0	0		0	224.101	0	0
	0	267.848	0	0		0	171.784	0	0		0	224.902	0	0		0	224.902	0	0		0	224.902	0	0
	4.80002	268.801	1.78571	2.38526		5.74652	172.396	3.33333	77.8789		0	225.702	0	0		0	225.702	0	0		0	225.702	0	0
	0	269.754	0	0		0	173.007	0	0		0	226.503	0	0		0	226.503	0	0		0	226.503	0	0
	0	270.708	0	0		0	173.618	0	0		0	227.303	0	0		0	227.303	0	0		0	227.303	0	0
	4.85108	271.661	1.78571	1.35094		0	174.23	0	0		0	228.103	0	0		0	228.103	0	0		0	228.103	0	0
	0	272.614	0	0		0	174.841	0	0		0	228.904	0	0		0	228.904	0	0		0	228.904	0	0
	4.88513	273.567	1.78571	0.823639		0	175.452	0	0		0	229.704	0	0		0	229.704	0	0		0	229.704	0	0
	0	274.52	0	0		0	176.064	0	0		0	230.504	0	0		0	230.504	0	0		0	230.504	0	0
	0	275.474	0	0		0	176.675	0	0		0	231.305	0	0		0	231.305	0	0		0	231.305	0	0
	0	276.427	0	0		0	177.286	0	0		5.73099	232.105	2.46914	89.5562		7.25329	232.105	3.125	105.311		5.73099	232.105	2.46914	24.4055
	9.90643	277.38	3.57143	0.316891		0	177.898	0	0		0	232.905	0	0		0	232.905	0	0		0	232.905	0	0
	0	278.333	0	0		0	178.509	0	0		0	233.706	0	0		0	233.706	0	0		0	233.706	0	0
	0	279.286	0	0		0	179.12	0	0		2.89514	234.506	1.23457	41.2789		3.66416	234.506	1.5625	48.3899		2.89514	234.506	1.23457	14.1378
	0	280.24	0	0		0	179.732	0	0		0	235.307	0	0		0	235.307	0	0		0	235.307	0	0
	0	281.193	0	0		0	180.343	0	0		2.9149	236.107	1.23457	39.025		0	236.107	0	0		2.9149	236.107	1.23457	15.507
	0	282.146	0	0		6.03181	180.954	3.33333	52.7411		0	236.907	0	0		0	236.907	0	0		0	236.907	0	0
	0	283.099	0	0		0	181.566	0	0		0	237.708	0	0		0	237.708	0	0		0	237.708	0	0
	10.1447	284.052	3.57143	0.487252		0	182.177	0	0		2.94454	238.508	1.23457	35.7629		3.72669	238.508	1.5625	41.6805		2.94454	238.508	1.23457	17.6793
	0	285.005	0	0		0	182.788	0	0		0	239.308	0	0		0	239.308	0	0		0	239.308	0	0
	0	285.959	0	0		0	183.4	0	0		5.92861	240.109	2.46914	67.3347		7.5034	240.109	3.125	78.2741		5.92861	240.109	2.46914	38.4132
	0	286.912	0	0		0	184.011	0	0		0	240.909	0	0		0	240.909	0	0		0	240.909	0	0
	5.14045	287.865	1.78571	1.00619		0	184.622	0	0		0	241.709	0	0		0	241.709	0	0		0	241.709	0	0
	0	288.818	0	0		0	185.234	0	0		2.99395	242.51	1.23457	30.6425		3.78922	242.51	1.5625	35.4718		2.99395	242.51	1.23457	21.6162
	0	289.772	0	0		0	185.845	0	0		0	243.31	0	0		0	243.31	0	0		0	243.31	0	0
	0	290.725	0	0		0	186.456	0	0		0	244.111	0	0		0	244.111	0	0		0	244.111	0	0
	0	291.678	0	0		0	187.068	0	0		0	244.911	0	0		0	244.911	0	0		0	244.911	0	0
	0	292.631	0	0		0	187.679	0	0		0	245.711	0	0		0	245.711	0	0		0	245.711	0	0
	5.24258	293.584	1.78571	3.12353		0	188.29	0	0		3.04335	246.512	1.23457	25.9175		3.85175	246.512	1.5625	29.7635		3.04335	246.512	1.23457	25.9485
	0	294.538	0	0		0	188.902	0	0		0	247.312	0	0		0	247.312	0	0		0	247.312	0	0
	5.27662	295.491	1.78571	4.08891		0	189.513	0	0		0	248.112	0	0		0	248.112	0	0		0	248.112	0	0
	0	296.444	0	0		0	190.124	0	0		0	248.913	0	0		0	248.913	0	0		0	248.913	0	0
	0	297.397	0	0		0	190.736	0	0		0	249.713	0	0		0	249.713	0	0		0	249.713	0	0
	0	298.35	0	0		6.37823	191.347	3.33333	28.782		0	250.513	0	0		0	250.513	0	0		0	250.513	0	0
	0	299.303	0	0		0	191.958	0	0		0	251.314	0	0		0	251.314	0	0		0	251.314	0	0
	0	300.257	0	0		0	192.57	0	0		0	252.114	0	0		0	252.114	0	0		0	252.114	0	0
	0	301.21	0	0		0	193.181	0	0		0	252.915	0	0		0	252.915	0	0		0	252.915	0	0
	0	302.163	0	0		0	193.792	0	0		0	253.715	0	0		0	253.715	0	0		0	253.715	0	0
	0	303.116	0	0		0	194.404	0	0		0	254.515	0	0		0	254.515	0	0		0	254.515	0	0
	5.42981	304.069	1.78571	10.0393		6.5005	195.015	3.33333	22.0449		0	255.316	0	0		0	255.316	0	0		0	255.316	0	0
	0	305.023	0	0		0	195.626	0	0		0	256.116	0	0		0	256.116	0	0		0	256.116	0	0
	0	305.976	0	0		0	196.238	0	0		0	256.916	0	0		0	256.916	0	0		0	256.916	0	0
	0	306.929	0	0		0	196.849	0	0		0	257.717	0	0		0	257.717	0	0		0	257.717	0	0
	10.9958	307.882	3.57143	27.0552		0	197.46	0	0		0	258.517	0	0		0	258.517	0	0		0	258.517	0	0
	0	308.835	0	0		0	198.072	0	0		3.20145	259.317	1.23457	13.4546		0	259.317	0	0		3.20145	259.317	1.23457	42.4691
	0	309.789	0	0		0	198.683	0	0		0	260.118	0	0		0	260.118	0	0		0	260.118	0	0
	0	310.742	0	0		0	199.294	0	0		12.8849	260.918	4.93827	48.726		12.2305	260.918	4.6875	40.0723		12.8849	260.918	4.93827	179.275
	0	311.695	0	0		0	199.906	0	0		0	261.719	0	0		0	261.719	0	0		0	261.719	0	0
	0	312.648	0	0		0	200.517	0	0		0	262.519	0	0		0	262.519	0	0		0	262.519	0	0
	0	313.601	0	0		6.70428	201.128	3.33333	12.8098		9.75257	263.319	3.7037	31.1712		8.22873	263.319	3.125	22.5073		9.75257	263.319	3.7037	145.387
	0	314.555	0	0		0	201.74	0	0		0	264.12	0	0		0	264.12	0	0		0	264.12	0	0
	0	315.508	0	0		0	202.351	0	0		0	264.92	0	0		0	264.92	0	0		0	264.92	0	0
	16.9533	316.461	5.35714	69.8235		0	202.962	0	0		0	265.72	0	0		0	265.72	0	0		0	265.72	0	0
	0	317.414	0	0		0	203.574	0	0		0	266.521	0	0		0	266.521	0	0		0	266.521	0	0
	0	318.367	0	0		0	204.185	0	0		6.60052	267.321	2.46914	15.4431		4.17689	267.321	1.5625	8.14772		6.60052	267.321	2.46914	109.701
	0	319.32	0	0		0	204.796	0	0		0	268.122	0	0		0	268.122	0	0		0	268.122	0	0
	0	320.274	0	0		0	205.408	0	0		0	268.922	0	0		0	268.922	0	0		0	268.922	0	0
	0	321.227	0	0		0	206.019	0	0		0	269.722	0	0		0	269.722	0	0		0	269.722	0	0
	0	322.18	0	0		0	206.63	0	0		0	270.523	0	0		0	270.523	0	0		0	270.523	0	0
	0	323.133	0	0		0	207.242	0	0		3.34967	271.323	1.23457	5.44813		0	271.323	0	0		3.34967	271.323	1.23457	61.6345
	0	324.087	0	0		0	207.853	0	0		0	272.123	0	0		0	272.123	0	0		0	272.123	0	0
	11.6086	325.04	3.57143	71.2999		0	208.464	0	0		0	272.924	0	0		0	272.924	0	0		0	272.924	0	0
	0	325.993	0	0		0	209.076	0	0		6.75862	273.724	2.46914	8.54774		4.27694	273.724	1.5625	4.21916		6.75862	273.724	2.46914	131.789
	0	326.946	0	0		6.98957	209.687	3.33333	4.06617		0	274.524	0	0		0	274.524	0	0		0	274.524	0	0
	0	327.899	0	0		0	210.298	0	0		3.39907	275.325	1.23457	3.57013		4.30195	275.325	1.5625	3.43721		3.39907	275.325	1.23457	68.8138
	0	328.853	0	0		0	210.91	0	0		0	276.125	0	0		0	276.125	0	0		0	276.125	0	0
	0	329.806	0	0		0	211.521	0	0		0	276.925	0	0		0	276.925	0	0		0	276.925	0	0
	0	330.759	0	0		0	212.132	0	0		6.85743	277.726	2.46914	5.26625		4.33947	277.726	1.5625	2.4144		6.85743	277.726	2.46914	146.623
	0	331.712	0	0		0	212.744	0	0		0	278.526	0	0		0	278.526	0	0		0	278.526	0	0
	0	332.665	0	0		0	213.355	0	0		10.3454	279.327	3.7037	6.26254		13.0934	279.327	4.6875	5.49779		10.3454	279.327	3.7037	229.166
	0	333.618	0	0		0	213.966	0	0		0	280.127	0	0		0	280.127	0	0		0	280.127	0	0
	5.97449	334.572	1.78571	52.4831		0	214.578	0	0		0	280.927	0	0		0	280.927	0	0		0	280.927	0	0
	0	335.525	0	0		0	215.189	0	0		0	281.728	0	0		0	281.728	0	0		0	281.728	0	0
	0	336.478	0	0		0	215.8	0	0		0	282.528	0	0		0	282.528	0	0		0	282.528	0	0
	0	337.431	0	0		0	216.412	0	0		6.99576	283.328	2.46914	2.00072		4.42701	283.328	1.5625	0.728478		6.99576	283.328	2.46914	168.718
	0	338.385	0	0		0	217.023	0	0		0	284.129	0	0		0	284.129	0	0		0	284.129	0	0
	6.0596	339.338	1.78571	62.1164		7.25448	217.634	3.33333	0.319794		0	284.929	0	0		0	284.929	0	0		0	284.929	0	0
	0	340.291	0	0		0	218.246	0	0		0	285.729	0	0		0	285.729	0	0		0	285.729	0	0
	0	341.244	0	0		0	218.857	0	0		0	286.53	0	0		0	286.53	0	0		0	286.53	0	0
	0	342.197	0	0		0	219.468	0	0		7.09457	287.33	2.46914	0.617237		0	287.33	0	0		7.09457	287.33	2.46914	185.449
	0	343.15	0	0		7.33599	220.08	3.33333	0.0141741		0	288.131	0	0		0	288.131	0	0		0	288.131	0	0
	0	344.104	0	0		0	220.691	0	0		0	288.931	0	0		0	288.931	0	0		0	288.931	0	0
	0	345.057	0	0		0	221.302	0	0		0	289.731	0	0		0	289.731	0	0		0	289.731	0	0
	0	346.01	0	0		0	221.914	0	0		0	290.532	0	0		0	290.532	0	0		0	290.532	0	0
	0	346.963	0	0		0	222.525	0	0		0	291.332	0	0		0	291.332	0	0		0	291.332	0	0
	0	347.916	0	0		0	223.136	0	0		3.60657	292.132	1.23457	0.000482094		4.56457	292.132	1.5625	0.0610045		3.60657	292.132	1.23457	103.285
	0	348.87	0	0		0	223.748	0	0		0	292.933	0	0		0	292.933	0	0		0	292.933	0	0
	0	349.823	0	0		0	224.359	0	0		0	293.733	0	0		0	293.733	0	0		0	293.733	0	0
	0	350.776	0	0		0	224.97	0	0		0	294.534	0	0		0	294.534	0	0		0	294.534	0	0
	0	351.729	0	0		0	225.582	0	0		0	295.334	0	0		0	295.334	0	0		0	247.843	0	0
	0	352.682	0	0		0	226.193	0	0		3.65598	296.134	1.23457	0.178665		4.6271	296.134	1.5625	0.558331		9.94058	248.515	4	91.5795
	0	353.636	0	0		0	226.804	0	0		0	296.935	0	0		0	296.935	0	0		0	249.186	0	0
	0	354.589	0	0		0	227.416	0	0		0	297.735	0	0		0	297.735	0	0		0	249.858	0	0
	0	355.542	0	0		7.6009	228.027	3.33333	1.774		0	298.535	0	0		0	298.535	0	0		0	250.53	0	0
	0	356.495	0	0		0	228.638	0	0		0	299.336	0	0		0	299.336	0	0		0	251.201	0	0
	0	357.448	0	0		0	229.25	0	0		3.70538	300.136	1.23457	0.752265		4.68963	300.136	1.5625	1.55611		0	251.873	0	0
	0	358.402	0	0		0	229.861	0	0		0	300.936	0	0		0	300.936	0	0		0	252.544	0	0
	0	359.355	0	0		0	230.472	0	0		3.72514	301.737	1.23457	1.09242		4.71464	301.737	1.5625	2.09534		0	253.216	0	0
	0	360.308	0	0		0	231.084	0	0		0	302.537	0	0		0	302.537	0	0		0	253.888	0	0
	0	361.261	0	0		0	231.695	0	0		0	303.337	0	0		0	303.337	0	0		0	254.56	0	0
	0	362.214	0	0		7.74354	232.306	3.33333	4.46572		7.50958	304.138	2.46914	3.44257		9.50431	304.138	3.125	6.10867		0	255.231	0	0
	0	363.168	0	0		0	232.918	0	0		0	304.938	0	0		0	304.938	0	0		0	255.903	0	0
	0	364.121	0	0		0	233.529	0	0		0	305.738	0	0		0	305.738	0	0		0	256.575	0	0
	0	365.074	0	0		0	234.14	0	0		7.56886	306.539	2.46914	4.985		4.78967	306.539	1.5625	4.1935		0	257.246	0	0
	0	366.027	0	0		0	234.752	0	0		0	307.339	0	0		0	307.339	0	0		0	257.918	0	0
	0	366.98	0	0		0	235.363	0	0		15.2168	308.14	4.93827	12.3429		4.81468	308.14	1.5625	5.05301		0	258.589	0	0
	0	367.933	0	0		0	235.974	0	0		0	308.94	0	0		0	308.94	0	0		0	259.261	0	0
	0	368.887	0	0		7.88619	236.586	3.33333	8.37821		0	309.74	0	0		0	309.74	0	0		0	259.933	0	0
	0	369.84	0	0		0	237.197	0	0		7.66767	310.541	2.46914	8.18838		9.7044	310.541	3.125	12.9849		0	260.604	0	0
	0	370.793	0	0		0	237.808	0	0		0	311.341	0	0		0	311.341	0	0		0	261.276	0	0
	0	371.746	0	0		7.94732	238.42	3.33333	10.4287		3.8536	312.141	1.23457	4.84557		0	312.141	0	0		0	261.948	0	0
	0	372.7	0	0		0	239.031	0	0		0	312.942	0	0		0	312.942	0	0		0	262.62	0	0
	0	373.653	0	0		0	239.642	0	0		0	313.742	0	0		0	313.742	0	0		0	263.291	0	0
	0	374.606	0	0		8.00845	240.254	3.33333	12.7035		0	314.543	0	0		0	314.543	0	0		0	263.963	0	0
	0	375.559	0	0		0	240.865	0	0		0	315.343	0	0		0	315.343	0	0		0	264.635	0	0
	0	376.512	0	0		0	241.476	0	0		3.903	316.143	1.23457	7.0009		9.87948	316.143	3.125	21.1036		0	265.306	0	0
	0	377.466	0	0		0	242.088	0	0		0	316.944	0	0		0	316.944	0	0		0	265.978	0	0
	0	378.419	0	0		0	242.699	0	0		0	317.744	0	0		0	317.744	0	0		0	266.649	0	0
	0	379.372	0	0		0	243.31	0	0		3.93265	318.544	1.23457	8.48382		9.95451	318.544	3.125	25.1834		0	267.321	0	0
	0	380.325	0	0		0	243.922	0	0		0	319.345	0	0		0	319.345	0	0		0	267.993	0	0
	0	381.278	0	0		0	244.533	0	0		0	320.145	0	0		0	320.145	0	0		0	268.664	0	0
	0	382.231	0	0		0	245.144	0	0		0	320.945	0	0		5.01477	320.945	1.5625	14.8118		0	269.336	0	0
	0	383.185	0	0		0	245.756	0	0		0	321.746	0	0		0	321.746	0	0		0	270.008	0	0
	6.8596	384.138	1.78571	192.323		8.21223	246.367	3.33333	21.9055		3.98205	322.546	1.23457	11.2718		15.1194	322.546	4.6875	49.1763		0	270.679	0	0
	0	385.091	0	0		0	246.978	0	0		0	323.346	0	0		0	323.346	0	0		0	271.351	0	0
	0	386.044	0	0		0	247.59	0	0		0	324.147	0	0		0	324.147	0	0		0	272.023	0	0
	0	386.997	0	0		0	248.201	0	0		4.0117	324.947	1.23457	13.1344		0	324.947	0	0		0	272.694	0	0
	0	387.951	0	0		0	248.812	0	0		0	325.748	0	0		0	325.748	0	0		0	273.366	0	0
	0	388.904	0	0		0	249.424	0	0		4.03146	326.548	1.23457	14.4552		0	326.548	0	0		0	274.038	0	0
	0	389.857	0	0		0	250.035	0	0		0	327.348	0	0		0	327.348	0	0		0	274.709	0	0
	6.97875	390.81	1.78571	217.849		0	250.646	0	0		0	328.149	0	0		0	328.149	0	0		11.0152	275.381	4	223.293
	0	391.763	0	0		0	251.258	0	0		4.0611	328.949	1.23457	16.555		10.2797	328.949	3.125	47.0271		0	276.053	0	0
	0	392.717	0	0		0	251.869	0	0		0	329.749	0	0		0	329.749	0	0		0	276.724	0	0
	0	393.67	0	0		0	252.48	0	0		0	330.55	0	0		0	330.55	0	0		0	277.396	0	0
	7.04684	394.623	1.78571	233.149		25.3092	253.092	10	104.716		0	331.35	0	0		0	331.35	0	0		0	278.068	0	0
	0	395.576	0	0		0	253.703	0	0		0	332.151	0	0		0	332.151	0	0		0	278.739	0	0
	0	396.529	0	0		0	254.314	0	0		0	332.951	0	0		5.20236	332.951	1.5625	28.6149		0	279.411	0	0
	0	397.483	0	0		8.49752	254.926	3.33333	38.9741		0	333.751	0	0		0	333.751	0	0		0	280.083	0	0
	0	398.436	0	0		0	255.537	0	0		0	334.552	0	0		0	334.552	0	0		0	280.754	0	0
	0	399.389	0	0		0	256.148	0	0		4.14015	335.352	1.23457	22.8504		5.23987	335.352	1.5625	31.916		11.257	281.426	4	260.887
	0	400.342	0	0		0	256.76	0	0		0	336.152	0	0		0	336.152	0	0		0	282.098	0	0
	0	401.295	0	0		0	257.371	0	0		4.15991	336.953	1.23457	24.5825		10.5298	336.953	3.125	68.434		0	282.769	0	0
	0	402.249	0	0		0	257.982	0	0		0	337.753	0	0		0	337.753	0	0		0	283.441	0	0
	7.20003	403.202	1.78571	269.472		0	258.594	0	0		0	338.553	0	0		0	338.553	0	0		0	284.113	0	0
	0	404.155	0	0		0	259.205	0	0		4.18955	339.354	1.23457	27.2991		0	339.354	0	0		0	284.784	0	0
	0	405.108	0	0		0	259.816	0	0		0	340.154	0	0		0	340.154	0	0		0	285.456	0	0
	0	406.061	0	0		0	260.428	0	0		0	340.954	0	0		5.32741	340.954	1.5625	40.3194		0	286.128	0	0
	0	407.014	0	0		8.7013	261.039	3.33333	54.1557		0	341.755	0	0		0	341.755	0	0		0	286.799	0	0
	0	407.968	0	0		0	261.65	0	0		0	342.555	0	0		0	342.555	0	0		0	287.471	0	0
	7.30216	408.921	1.78571	295.147		0	262.262	0	0		0	343.356	0	0		0	343.356	0	0		0	288.143	0	0
	0	409.874	0	0		8.76243	262.873	3.33333	59.196		0	344.156	0	0		0	344.156	0	0		0	288.814	0	0
	0	410.827	0	0		0	263.484	0	0		0	344.956	0	0		5.38994	344.956	1.5625	46.9222		0	289.486	0	0
	0	411.781	0	0		0	264.096	0	0		0	345.757	0	0		0	345.757	0	0		0	290.158	0	0
	0	412.734	0	0		0	264.707	0	0		0	346.557	0	0		0	346.557	0	0		0	290.829	0	0
	0	413.687	0	0		0	265.318	0	0		8.57673	347.357	2.46914	74.7658		5.42746	347.357	1.5625	51.1242		0	291.501	0	0
	0	414.64	0	0		0	265.93	0	0		0	348.158	0	0		0	348.158	0	0		0	292.173	0	0
	0	415.593	0	0		0	266.541	0	0		0	348.958	0	0		0	348.958	0	0		0	292.844	0	0
	0	416.546	0	0		0	267.152	0	0		4.31801	349.759	1.23457	40.7164		5.46498	349.759	1.5625	55.5063		0	293.516	0	0
	0	417.5	0	0		0	267.764	0	0		0	350.559	0	0		0	350.559	0	0		0	294.188	0	0
	0	418.453	0	0		0	268.375	0	0		0	351.359	0	0		0	351.359	0	0		0	294.859	0	0
	0	419.406	0	0		0	268.986	0	0		0	352.16	0	0		0	352.16	0	0		0	295.531	0	0
	0	420.359	0	0		0	269.598	0	0		0	352.96	0	0		0	352.96	0	0		0	296.202	0	0
	7.52344	421.312	1.78571	354.785		0	270.209	0	0		0	353.76	0	0		0	353.76	0	0		0	296.874	0	0
	0	422.266	0	0		0	270.82	0	0		0	354.561	0	0		0	354.561	0	0		0	297.546	0	0
	7.55748	423.219	1.78571	364.447		9.04772	271.432	3.33333	85.6823		0	355.361	0	0		0	355.361	0	0		0	298.217	0	0
	0	424.172	0	0		0	272.043	0	0		0	356.161	0	0		0	356.161	0	0		0	298.889	0	0
	0	425.125	0	0		0	272.654	0	0		0	356.962	0	0		0	356.962	0	0		0	299.561	0	0
	0	426.079	0	0		9.10885	273.265	3.33333	91.9934		8.83363	357.762	2.46914	105.713		5.59003	357.762	1.5625	71.4144		12.0093	300.233	4	396.54
	0	427.032	0	0		0	273.877	0	0		0	358.562	0	0		0	358.562	0	0		0	300.904	0	0
	0	427.985	0	0		0	274.488	0	0		4.43658	359.363	1.23457	55.474		0	359.363	0	0		0	301.576	0	0
	0	428.938	0	0		0	275.099	0	0		0	360.163	0	0		0	360.163	0	0		0	302.248	0	0
	0	429.891	0	0		0	275.711	0	0		0	360.964	0	0		0	360.964	0	0		0	302.919	0	0
	0	430.844	0	0		0	276.322	0	0		0	361.764	0	0		5.65256	361.764	1.5625	80.1191		0	303.591	0	0
	0	431.798	0	0		0	276.933	0	0		0	362.564	0	0		0	362.564	0	0		0	304.262	0	0
	0	432.751	0	0		0	277.545	0	0		0	363.365	0	0		0	363.365	0	0		0	304.934	0	0
	0	433.704	0	0		0	278.156	0	0		0	364.165	0	0		0	364.165	0	0		0	305.606	0	0
	0	434.657	0	0		0	278.767	0	0		0	364.965	0	0		0	364.965	0	0		0	306.277	0	0
	0	435.61	0	0		0	279.379	0	0		9.03126	365.766	2.46914	133.156		5.71509	365.766	1.5625	89.3245		0	306.949	0	0
	0	436.564	0	0		0	279.99	0	0		0	366.566	0	0		0	366.566	0	0		0	307.621	0	0
	0	437.517	0	0		0	280.601	0	0		0	367.366	0	0		0	367.366	0	0		0	308.292	0	0
	0	438.47	0	0		0	281.213	0	0		0	368.167	0	0		0	368.167	0	0		0	308.964	0	0
	0	439.423	0	0		0	281.824	0	0		0	368.967	0	0		0	368.967	0	0		0	309.636	0	0
	0	440.376	0	0		0	282.435	0	0		0	369.767	0	0		0	369.767	0	0		12.4123	310.307	4	480.849
	0	441.33	0	0		0	283.047	0	0		0	370.568	0	0		0	370.568	0	0		0	310.979	0	0
	0	442.283	0	0		0	283.658	0	0		0	371.368	0	0		0	371.368	0	0		0	311.651	0	0
	0	443.236	0	0		0	284.269	0	0		4.59467	372.169	1.23457	78.6938		11.6303	372.169	3.125	210.187		0	312.322	0	0
	7.93195	444.189	1.78571	479.294		0	284.881	0	0		0	372.969	0	0		0	372.969	0	0		0	312.994	0	0
	0	445.142	0	0		0	285.492	0	0		0	373.769	0	0		0	373.769	0	0		0	313.666	0	0
	0	446.096	0	0		0	286.103	0	0		0	374.57	0	0		0	374.57	0	0		0	314.337	0	0
	0	447.049	0	0		0	286.715	0	0		0	375.37	0	0		0	375.37	0	0		0	315.009	0	0
	0	448.002	0	0		0	287.326	0	0		0	376.17	0	0		0	376.17	0	0		0	315.681	0	0
	0	448.955	0	0		0	287.938	0	0		0	376.971	0	0		0	376.971	0	0		0	316.352	0	0
	0	449.908	0	0		0	288.549	0	0		9.32768	377.771	2.46914	180.252		5.90268	377.771	1.5625	119.943		0	317.024	0	0
	0	450.862	0	0		0	289.16	0	0		0	378.572	0	0		0	378.572	0	0		0	317.696	0	0
	0	451.815	0	0		9.65905	289.772	3.33333	158.883		0	379.372	0	0		0	379.372	0	0		0	318.367	0	0
	0	452.768	0	0		0	290.383	0	0		0	380.172	0	0		0	380.172	0	0		0	319.039	0	0
	0	453.721	0	0		0	290.994	0	0		0	380.973	0	0		0	380.973	0	0		0	319.711	0	0
	0	454.674	0	0		0	291.606	0	0		0	381.773	0	0		0	381.773	0	0		0	320.382	0	0
	0	455.627	0	0		0	292.217	0	0		0	382.573	0	0		0	382.573	0	0		0	321.054	0	0
	0	456.581	0	0		0	292.828	0	0		0	383.374	0	0		0	383.374	0	0		0	321.726	0	0
	0	457.534	0	0		0	293.44	0	0		4.74289	384.174	1.23457	104.14		6.00272	384.174	1.5625	138.114		0	322.397	0	0
	0	458.487	0	0		0	294.051	0	0		0	384.974	0	0		0	384.974	0	0		0	323.069	0	0
	0	459.44	0	0		0	294.662	0	0		0	385.775	0	0		0	385.775	0	0		0	323.741	0	0
	0	460.394	0	0		0	295.274	0	0		0	386.575	0	0		0	386.575	0	0		0	324.412	0	0
	0	461.347	0	0		0	295.885	0	0		0	387.375	0	0		0	387.375	0	0		0	325.084	0	0
	0	462.3	0	0		0	296.496	0	0		0	388.176	0	0		0	388.176	0	0		0	325.756	0	0
	0	463.253	0	0		0	297.108	0	0		0	388.976	0	0		0	388.976	0	0		0	326.427	0	0
	0	464.206	0	0		0	297.719	0	0		0	389.777	0	0		0	389.777	0	0		0	327.099	0	0
	0	465.159	0	0		0	298.33	0	0		0	390.577	0	0		0	390.577	0	0		0	327.771	0	0
	0	466.113	0	0		0	298.942	0	0		0	391.377	0	0		0	391.377	0	0		0	328.442	0	0
	0	467.066	0	0		0	299.553	0	0		4.8417	392.178	1.23457	123.081		0	392.178	0	0		0	329.114	0	0
	0	468.019	0	0		0	300.164	0	0		0	392.978	0	0		0	392.978	0	0		0	329.786	0	0
	0	468.972	0	0		0	300.776	0	0		0	393.778	0	0		0	393.778	0	0		0	330.457	0	0
	0	469.925	0	0		0	301.387	0	0		0	394.579	0	0		0	394.579	0	0		0	331.129	0	0
	0	470.879	0	0		10.0666	301.998	3.33333	220.141		0	395.379	0	0		0	395.379	0	0		0	331.801	0	0
	0	471.832	0	0		0	302.61	0	0		0	396.18	0	0		0	396.18	0	0		0	332.472	0	0
	0	472.785	0	0		0	303.221	0	0		4.90099	396.98	1.23457	135.205		0	396.98	0	0		0	333.144	0	0
	0	473.738	0	0		0	303.832	0	0		0	397.78	0	0		0	397.78	0	0		0	333.816	0	0
	0	474.691	0	0		0	304.443	0	0		0	398.581	0	0		0	398.581	0	0		0	334.487	0	0
	0	475.645	0	0		0	305.055	0	0		0	399.381	0	0		0	399.381	0	0		0	335.159	0	0
	0	476.598	0	0		0	305.666	0	0		0	400.181	0	0		0	400.181	0	0		0	335.83	0	0
	0	477.551	0	0		0	306.277	0	0		4.95039	400.982	1.23457	145.743		0	400.982	0	0		0	336.502	0	0
	0	478.504	0	0		0	306.889	0	0		0	401.782	0	0		0	401.782	0	0		0	337.174	0	0
	0	479.457	0	0		0	307.5	0	0		0	402.582	0	0		0	402.582	0	0		0	337.846	0	0
	0	480.411	0	0		0	308.111	0	0		0	403.383	0	0		0	403.383	0	0		0	338.517	0	0
	0	481.364	0	0		0	308.723	0	0		0	404.183	0	0		0	404.183	0	0		0	339.189	0	0
	0	482.317	0	0		0	309.334	0	0		0	404.983	0	0		0	404.983	0	0		0	339.861	0	0
	0	483.27	0	0		0	309.945	0	0		0	405.784	0	0		0	405.784	0	0		0	340.532	0	0
	0	484.223	0	0		0	310.557	0	0		5.01956	406.584	1.23457	161.161		0	406.584	0	0		0	341.204	0	0
	0	485.177	0	0		0	311.168	0	0		0	407.385	0	0		0	407.385	0	0		0	341.875	0	0
	0	486.13	0	0		0	311.779	0	0		0	408.185	0	0		0	408.185	0	0		0	342.547	0	0
	8.69791	487.083	1.78571	763.124		10.413	312.391	3.33333	280.046		5.0492	408.985	1.23457	168.006		6.3904	408.985	1.5625	220.63		13.7288	343.219	4	812.852
	0			0		0			0		0			0		0			0		0			0
	0			0		0			0		0			0		0			0		0			0
	0			0		0			0		0			0		0			0		0			0
	0			0		0			0		0			0		0			0		0			0
	0			0		0			0		0			0		0			0		0			0
	0			0		0			0		0			0		0			0		0			0
	0			0		0			0		0			0		0			0		0			0
	0			0		0			0		0			0		0			0		0			0
	0			0		0			0		0			0		0			0		0			0
	0			0		0			0		0			0		0			0		0			0
	0			0		0			0		0			0		0			0		0			0
	0			0		0			0		0			0		0			0		0			0
	0			0		0			0		0			0		0			0		0			0
	0			0		0			0		0			0		0			0		0			0
	0			0		0			0		0			0		0			0		0			0
	0			0		0			0		0			0		0			0		0			0
	0			0		0			0		0			0		0			0		0			0
	0			0		0			0		0			0		0			0		0			0
	0			0		0			0		0			0		0			0		0			0
	0			0		0			0		0			0		0			0		0			0
	0			0		0			0		0			0		0			0		0			0
	0			0		0			0		0			0		0			0		0			0
	0			0		0			0		0			0		0			0		0			0
	0			0		0			0		0			0		0			0		0			0
	0			0		0			0		0			0		0			0		0			0
	0			0		0			0		0			0		0			0		0			0
	0			0		0			0		0			0		0			0		0			0
	0			0		0			0		0			0		0			0		0			0
	0			0		0			0		0			0		0			0		0			0
	0			0		0			0		0			0		0			0		0			0
	0			0		0			0		0			0		0			0		0			0
	0			0		0			0		0			0		0			0		0			0
	0			0		0			0		0			0		0			0		0			0
	0			0		0			0		0			0		0			0		0			0
	0			0		0			0		0			0		0			0		0			0
	0			0		0			0		0			0		0			0		0			0
	0			0		0			0		0			0		0			0		0			0
	0			0		0			0		0			0		0			0		0			0
	0			0		0			0		0			0		0			0		0			0
	0			0		0			0		0			0		0			0		0			0
	0			0		0			0		0			0		0			0		0			0
	0			0		0			0		0			0		0			0		0			0
	0			0		0			0		0			0		0			0		0			0
	0			0		0			0		0			0		0			0		0			0
	0			0		0			0		0			0		0			0		0			0
	0			0		0			0		0			0		0			0		0			0
	0			0		0			0		0			0		0			0		0			0
	0			0		0			0		0			0		0			0		0			0
	0			0		0			0		0			0		0			0		0			0
	0			0		0			0		0			0		0			0		0			0
	0			0		0			0		0			0		0			0		0			0
	0			0		0			0		0			0		0			0		0			0
	0			0		0			0		0			0		0			0		0			0
	0			0		0			0		0			0		0			0		0			0
	0			0		0			0		0			0		0			0		0			0
	0			0		0			0		0			0		0			0		0			0
	0			0		0			0		0			0		0			0		0			0
	0			0		0			0		0			0		0			0		0			0
	0			0		0			0		0			0		0			0		0			0
	0			0		0			0		0			0		0			0		0			0
	0			0		0			0		0			0		0			0		0			0
	0			0		0			0		0			0		0			0		0			0
	0			0		0			0		0			0		0			0		0			0
	0			0		0			0		0			0		0			0		0			0
	0			0		0			0		0			0		0			0		0			0
	0			0		0			0		0			0		0			0		0			0
	0			0		0			0		0			0		0			0		0			0
	0			0		0			0		0			0		0			0		0			0
	0			0		0			0		0			0		0			0		0			0
	0			0		0			0		0			0		0			0		0			0
	0			0		0			0		0			0		0			0		0			0
	0			0		0			0		0			0		0			0		0			0
	0			0		0			0		0			0		0			0		0			0
	0			0		0			0		0			0		0			0		0			0
	0			0		0			0		0			0		0			0		0			0
	0			0		0			0		0			0		0			0		0			0
	0			0		0			0		0			0		0			0		0			0
	0			0		0			0		0			0		0			0		0			0
	0			0		0			0		0			0		0			0		0			0
	0			0		0			0		0			0		0			0		0			0
	0			0		0			0		0			0		0			0		0			0
	0			0		0			0		0			0		0			0		0			0
	0			0		0			0		0			0		0			0		0			0
	0			0		0			0		0			0		0			0		0			0
	0			0		0			0		0			0		0			0		0			0
	0			0		0			0		0			0		0			0		0			0
	0			0		0			0		0			0		0			0		0			0
	0			0		0			0		0			0		0			0		0			0
	0			0		0			0		0			0		0			0		0			0
	0			0		0			0		0			0		0			0		0			0
	0			0		0			0		0			0		0			0		0			0
	0			0		0			0		0			0		0			0		0			0
	0			0		0			0		0			0		0			0		0			0
	0			0		0			0		0			0		0			0		0			0
	0			0		0			0		0			0		0			0		0			0
	0			0		0			0		0			0		0			0		0			0
	0			0		0			0		0			0		0			0		0			0
	0			0		0			0		0			0		0			0		0			0
	0			0		0			0		0			0		0			0		0			0
	0			0		0			0		0			0		0			0		0			0
	0			0		0			0		0			0		0			0		0			0
	0			0		0			0		0			0		0			0		0			0
	0			0		0			0		0			0		0			0		0			0
	0			0		0			0		0			0		0			0		0			0
	0			0		0			0		0			0		0			0		0			0
	0			0		0			0		0			0		0			0		0			0
	0			0		0			0		0			0		0			0		0			0
	0			0		0			0		0			0		0			0		0			0
	0			0		0			0		0			0		0			0		0			0
	0			0		0			0		0			0		0			0		0			0
	0			0		0			0		0			0		0			0		0			0
	0			0		0			0		0			0		0			0		0			0
	0			0		0			0		0			0		0			0		0			0
	0			0		0			0		0			0		0			0		0			0
	0			0		0			0		0			0		0			0		0			0
	0			0		0			0		0			0		0			0		0			0
	0			0		0			0		0			0		0			0		0			0
	0			0		0			0		0			0		0			0		0			0
	0			0		0			0		0			0		0			0		0			0
	0			0		0			0		0			0		0			0		0			0
	0			0		0			0		0			0		0			0		0			0
	0			0		0			0		0			0		0			0		0			0
	0			0		0			0		0			0		0			0		0			0
	0			0		0			0		0			0		0			0		0			0
	0			0		0			0		0			0		0			0		0			0
	0			0		0			0		0			0		0			0		0			0
	0			0		0			0		0			0		0			0		0			0
	0			0		0			0		0			0		0			0		0			0
	0			0		0			0		0			0		0			0		0			0
	0			0		0			0		0			0		0			0		0			0
	0			0		0			0		0			0		0			0		0			0
	0			0		0			0		0			0		0			0		0			0
	0			0		0			0		0			0		0			0		0			0
	0			0		0			0		0			0		0			0		0			0
	0			0		0			0		0			0		0			0		0			0
	0			0		0			0		0			0		0			0		0			0
	0			0		0			0		0			0		0			0		0			0
	0			0		0			0		0			0		0			0		0			0
	0			0		0			0		0			0		0			0		0			0
	0			0		0			0		0			0		0			0		0			0
	0			0		0			0		0			0		0			0		0			0
	0			0		0			0		0			0		0			0		0			0
	0			0		0			0		0			0		0			0		0			0
	0			0		0			0		0			0		0			0		0			0
	0			0		0			0		0			0		0			0		0			0
	0			0		0			0		0			0		0			0		0			0
	0			0		0			0		0			0		0			0		0			0
	0			0		0			0		0			0		0			0		0			0
	0			0		0			0		0			0		0			0		0			0
	0			0		0			0		0			0		0			0		0			0
	0			0		0			0		0			0		0			0		0			0
	0			0		0			0		0			0		0			0		0			0
	0			0		0			0		0			0		0			0		0			0
	0			0		0			0		0			0		0			0		0			0
	0			0		0			0		0			0		0			0		0			0
	0			0		0			0		0			0		0			0		0			0
	0			0		0			0		0			0		0			0		0			0
	0			0		0			0		0			0		0			0		0			0
	0			0		0			0		0			0		0			0		0			0
	0			0		0			0		0			0		0			0		0			0
	0			0		0			0		0			0		0			0		0			0
	0			0		0			0		0			0		0			0		0			0
	0			0		0			0		0			0		0			0		0			0
	0			0		0			0		0			0		0			0		0			0
	0			0		0			0		0			0		0			0		0			0
	0			0		0			0		0			0		0			0		0			0
	0			0		0			0		0			0		0			0		0			0
	0			0		0			0		0			0		0			0		0			0
	0			0		0			0		0			0		0			0		0			0
	0			0		0			0		0			0		0			0		0			0
	0			0		0			0		0			0		0			0		0			0
	0			0		0			0		0			0		0			0		0			0
	0			0		0			0		0			0		0			0		0			0
	0			0		0			0		0			0		0			0		0			0
	0			0		0			0		0			0		0			0		0			0
	0			0		0			0		0			0		0			0		0			0
	0			0		0			0		0			0		0			0		0			0
	0			0		0			0		0			0		0			0		0			0
	0			0		0			0		0			0		0			0		0			0
	0			0		0			0		0			0		0			0		0			0
	0			0		0			0		0			0		0			0		0			0
	0			0		0			0		0			0		0			0		0			0
	0			0		0			0		0			0		0			0		0			0
	0			0		0			0		0			0		0			0		0			0
	0			0		0			0		0			0		0			0		0			0
	0			0		0			0		0			0		0			0		0			0
	0			0		0			0		0			0		0			0		0			0
	0			0		0			0		0			0		0			0		0			0
	0			0		0			0		0			0		0			0		0			0
	0			0		0			0		0			0		0			0		0			0
	0			0		0			0		0			0		0			0		0			0
	0			0		0			0		0			0		0			0		0			0
	0			0		0			0		0			0		0			0		0			0
	0			0		0			0		0			0		0			0		0			0
	0			0		0			0		0			0		0			0		0			0
	0			0		0			0		0			0		0			0		0			0
	0			0		0			0		0			0		0			0		0			0
	0			0		0			0		0			0		0			0		0			0
	0			0		0			0		0			0		0			0		0			0
	0			0		0			0		0			0		0			0		0			0
	0			0		0			0		0			0		0			0		0			0
	0			0		0			0		0			0		0			0		0			0
	0			0		0			0		0			0		0			0		0			0
	0			0		0			0		0			0		0			0		0			0
	0			0		0			0		0			0		0			0		0			0
	0			0		0			0		0			0		0			0		0			0
	0			0		0			0		0			0		0			0		0			0
	0			0		0			0		0			0		0			0		0			0
	0			0		0			0		0			0		0			0		0			0
	0			0		0			0		0			0		0			0		0			0
	0			0		0			0		0			0		0			0		0			0
	0			0		0			0		0			0		0			0		0			0
	0			0		0			0		0			0		0			0		0			0
	0			0		0			0		0			0		0			0		0			0
	0			0		0			0		0			0		0			0		0			0
	0			0		0			0		0			0		0			0		0			0
	0			0		0			0		0			0		0			0		0			0
	0			0		0			0		0			0		0			0		0			0
	0			0		0			0		0			0		0			0		0			0
	0			0		0			0		0			0		0			0		0			0
	0			0		0			0		0			0		0			0		0			0
	0			0		0			0		0			0		0			0		0			0
	0			0		0			0		0			0		0			0		0			0
	0			0		0			0		0			0		0			0		0			0
	0			0		0			0		0			0		0			0		0			0
	0			0		0			0		0			0		0			0		0			0
	0			0		0			0		0			0		0			0		0			0
	0			0		0			0		0			0		0			0		0			0
	0			0		0			0		0			0		0			0		0			0
	0			0		0			0		0			0		0			0		0			0
	0			0		0			0		0			0		0			0		0			0
	0			0		0			0		0			0		0			0		0			0
	0			0		0			0		0			0		0			0		0			0
	0			0		0			0		0			0		0			0		0			0
	0			0		0			0		0			0		0			0		0			0
	0			0		0			0		0			0		0			0		0			0
	0			0		0			0		0			0		0			0		0			0
	0			0		0			0		0			0		0			0		0			0
	0			0		0			0		0			0		0			0		0			0
	0			0		0			0		0			0		0			0		0			0
	0			0		0			0		0			0		0			0		0			0
	0			0		0			0		0			0		0			0		0			0
	0			0		0			0		0			0		0			0		0			0
	0			0		0			0		0			0		0			0		0			0
	0			0		0			0		0			0		0			0		0			0
	0			0		0			0		0			0		0			0		0			0
	0			0		0			0		0			0		0			0		0			0
	0			0		0			0		0			0		0			0		0			0
	0			0		0			0		0			0		0			0		0			0
	0			0		0			0		0			0		0			0		0			0
	0			0		0			0		0			0		0			0		0			0
	0			0		0			0		0			0		0			0		0			0
	0			0		0			0		0			0		0			0		0			0
	0			0		0			0		0			0		0			0		0			0
	0			0		0			0		0			0		0			0		0			0
	0			0		0			0		0			0		0			0		0			0
	0			0		0			0		0			0		0			0		0			0
	0			0		0			0		0			0		0			0		0			0
	0			0		0			0		0			0		0			0		0			0
	0			0		0			0		0			0		0			0		0			0
	0			0		0			0		0			0		0			0		0			0
	0			0		0			0		0			0		0			0		0			0
	0			0		0			0		0			0		0			0		0			0
	0			0		0			0		0			0		0			0		0			0
	0			0		0			0		0			0		0			0		0			0
	0			0		0			0		0			0		0			0		0			0
	0			0		0			0		0			0		0			0		0			0
	0			0		0			0		0			0		0			0		0			0
	0			0		0			0		0			0		0			0		0			0
	0			0		0			0		0			0		0			0		0			0
	0			0		0			0		0			0		0			0		0			0
	0			0		0			0		0			0		0			0		0			0
	0			0		0			0		0			0		0			0		0			0
	0			0		0			0		0			0		0			0		0			0
	0			0		0			0		0			0		0			0		0			0
	0			0		0			0		0			0		0			0		0			0
	0			0		0			0		0			0		0			0		0			0
	0			0		0			0		0			0		0			0		0			0
	0			0		0			0		0			0		0			0		0			0
	0			0		0			0		0			0		0			0		0			0
	0			0		0			0		0			0		0			0		0			0
	0			0		0			0		0			0		0			0		0			0
	0			0		0			0		0			0		0			0		0			0
	0			0		0			0		0			0		0			0		0			0
	0			0		0			0		0			0		0			0		0			0
	0			0		0			0		0			0		0			0		0			0
	0			0		0			0		0			0		0			0		0			0
	0			0		0			0		0			0		0			0		0			0
	0			0		0			0		0			0		0			0		0			0
	0			0		0			0		0			0		0			0		0			0
	0			0		0			0		0			0		0			0		0			0
	0			0		0			0		0			0		0			0		0			0
	0			0		0			0		0			0		0			0		0			0
	0			0		0			0		0			0		0			0		0			0
	0			0		0			0		0			0		0			0		0			0
	0			0		0			0		0			0		0			0		0			0
	0			0		0			0		0			0		0			0		0			0
	0			0		0			0		0			0		0			0		0			0
	0			0		0			0		0			0		0			0		0			0
	0			0		0			0		0			0		0			0		0			0
	0			0		0			0		0			0		0			0		0			0
	0			0		0			0		0			0		0			0		0			0
	0			0		0			0		0			0		0			0		0			0
	0			0		0			0		0			0		0			0		0			0
	0			0		0			0		0			0		0			0		0			0
	0			0		0			0		0			0		0			0		0			0
	0			0		0			0		0			0		0			0		0			0
	0			0		0			0		0			0		0			0		0			0
	0			0		0			0		0			0		0			0		0			0
	0			0		0			0		0			0		0			0		0			0
	0			0		0			0		0			0		0			0		0			0
	0			0		0			0		0			0		0			0		0			0
	0			0		0			0		0			0		0			0		0			0
	0			0		0			0		0			0		0			0		0			0
	0			0		0			0		0			0		0			0		0			0
	0			0		0			0		0			0		0			0		0			0
	0			0		0			0		0			0		0			0		0			0
	0			0		0			0		0			0		0			0		0			0
	0			0		0			0		0			0		0			0		0			0
	0			0		0			0		0			0		0			0		0			0
	0			0		0			0		0			0		0			0		0			0
	0			0		0			0		0			0		0			0		0			0
	0			0		0			0		0			0		0			0		0			0
	0			0		0			0		0			0		0			0		0			0
	0			0		0			0		0			0		0			0		0			0
	0			0		0			0		0			0		0			0		0			0
	0			0		0			0		0			0		0			0		0			0
	0			0		0			0		0			0		0			0		0			0
	0			0		0			0		0			0		0			0		0			0
	0			0		0			0		0			0		0			0		0			0
	0			0		0			0		0			0		0			0		0			0
	0			0		0			0		0			0		0			0		0			0
	0			0		0			0		0			0		0			0		0			0
	0			0		0			0		0			0		0			0		0			0
	0			0		0			0		0			0		0			0		0			0
	0			0		0			0		0			0		0			0		0			0
	0			0		0			0		0			0		0			0		0			0
	0			0		0			0		0			0		0			0		0			0
	0			0		0			0		0			0		0			0		0			0
	0			0		0			0		0			0		0			0		0			0
	0			0		0			0		0			0		0			0		0			0
	0			0		0			0		0			0		0			0		0			0
	0			0		0			0		0			0		0			0		0			0
	0			0		0			0		0			0		0			0		0			0
	0			0		0			0		0			0		0			0		0			0
	0			0		0			0		0			0		0			0		0			0
	0			0		0			0		0			0		0			0		0			0
	0			0		0			0		0			0		0			0		0			0
	0			0		0			0		0			0		0			0		0			0
	0			0		0			0		0			0		0			0		0			0
	0			0		0			0		0			0		0			0		0			0
	0			0		0			0		0			0		0			0		0			0
	0			0		0			0		0			0		0			0		0			0
	0			0		0			0		0			0		0			0		0			0
	0			0		0			0		0			0		0			0		0			0
	0			0		0			0		0			0		0			0		0			0
	0			0		0			0		0			0		0			0		0			0
	0			0		0			0		0			0		0			0		0			0
	0			0		0			0		0			0		0			0		0			0
	0			0		0			0		0			0		0			0		0			0
	0			0		0			0		0			0		0			0		0			0
	0			0		0			0		0			0		0			0		0			0
	0			0		0			0		0			0		0			0		0			0
	0			0		0			0		0			0		0			0		0			0
	0			0		0			0		0			0		0			0		0			0
	0			0		0			0		0			0		0			0		0			0
	0			0		0			0		0			0		0			0		0			0
	0			0		0			0		0			0		0			0		0			0
	0			0		0			0		0			0		0			0		0			0
	0			0		0			0		0			0		0			0		0			0
	0			0		0			0		0			0		0			0		0			0
	0			0		0			0		0			0		0			0		0			0
	0			0		0			0		0			0		0			0		0			0
	0			0		0			0		0			0		0			0		0			0
	0			0		0			0		0			0		0			0		0			0
	0			0		0			0		0			0		0			0		0			0
	0			0		0			0		0			0		0			0		0			0
	0			0		0			0		0			0		0			0		0			0
	0			0		0			0		0			0		0			0		0			0
	0			0		0			0		0			0		0			0		0			0
	0			0		0			0		0			0		0			0		0			0
	0			0		0			0		0			0		0			0		0			0
	0			0		0			0		0			0		0			0		0			0
	0			0		0			0		0			0		0			0		0			0
	0			0		0			0		0			0		0			0		0			0
	0			0		0			0		0			0		0			0		0			0
	0			0		0			0		0			0		0			0		0			0
	0			0		0			0		0			0		0			0		0			0
	0			0		0			0		0			0		0			0		0			0
	0			0		0			0		0			0		0			0		0			0
	0			0		0			0		0			0		0			0		0			0
	0			0		0			0		0			0		0			0		0			0
	0			0		0			0		0			0		0			0		0			0
	0			0		0			0		0			0		0			0		0			0
	0			0		0			0		0			0		0			0		0			0
	0			0		0			0		0			0		0			0		0			0
	0			0		0			0		0			0		0			0		0			0
	0			0		0			0		0			0		0			0		0			0
	0			0		0			0		0			0		0			0		0			0
	0			0		0			0		0			0		0			0		0			0
	0			0		0			0		0			0		0			0		0			0
	0			0		0			0		0			0		0			0		0			0
	0			0		0			0		0			0		0			0		0			0
	0			0		0			0		0			0		0			0		0			0
	0			0		0			0		0			0		0			0		0			0
	0			0		0			0		0			0		0			0		0			0
	0			0		0			0		0			0		0			0		0			0
	0			0		0			0		0			0		0			0		0			0
	0			0		0			0		0			0		0			0		0			0
	0			0		0			0		0			0		0			0		0			0
	0			0		0			0		0			0		0			0		0			0
	0			0		0			0		0			0		0			0		0			0
	0			0		0			0		0			0		0			0		0			0
	0			0		0			0		0			0		0			0		0			0
	0			0		0			0		0			0		0			0		0			0
	0			0		0			0		0			0		0			0		0			0
	0			0		0			0		0			0		0			0		0			0
	0			0		0			0		0			0		0			0		0			0
	0			0		0			0		0			0		0			0		0			0
	0			0		0			0		0			0		0			0		0			0
	0			0		0			0		0			0		0			0		0			0
	0			0		0			0		0			0		0			0		0			0
	0			0		0			0		0			0		0			0		0			0
	0			0		0			0		0			0		0			0		0			0
	0			0		0			0		0			0		0			0		0			0
	0			0		0			0		0			0		0			0		0			0
	0			0		0			0		0			0		0			0		0			0
	0			0		0			0		0			0		0			0		0			0
	0			0		0			0		0			0		0			0		0			0
	0			0		0			0		0			0		0			0		0			0
	0			0		0			0		0			0		0			0		0			0
	0			0		0			0		0			0		0			0		0			0
	0			0		0			0		0			0		0			0		0			0
	0			0		0			0		0			0		0			0		0			0
	0			0		0			0		0			0		0			0		0			0
	0			0		0			0		0			0		0			0		0			0
	0			0		0			0		0			0		0			0		0			0
	0			0		0			0		0			0		0			0		0			0
	0			0		0			0		0			0		0			0		0			0
	0			0		0			0		0			0		0			0		0			0
	0			0		0			0		0			0		0			0		0			0
	0			0		0			0		0			0		0			0		0			0
	0			0		0			0		0			0		0			0		0			0
	0			0		0			0		0			0		0			0		0			0
	0			0		0			0		0			0		0			0		0			0
	0			0		0			0		0			0		0			0		0			0
	0			0		0			0		0			0		0			0		0			0
	0			0		0			0		0			0		0			0		0			0
	0			0		0			0		0			0		0			0		0			0
	0			0		0			0		0			0		0			0		0			0
	0			0		0			0		0			0		0			0		0			0
	0			0		0			0		0			0		0			0		0			0
	0			0		0			0		0			0		0			0		0			0
	0			0		0			0		0			0		0			0		0			0
	0			0		0			0		0			0		0			0		0			0
	0			0		0			0		0			0		0			0		0			0
	0			0		0			0		0			0		0			0		0			0
	0			0		0			0		0			0		0			0		0			0
	0			0		0			0		0			0		0			0		0			0
	0			0		0			0		0			0		0			0		0			0
	0			0		0			0		0			0		0			0		0			0
	0			0		0			0		0			0		0			0		0			0
	0			0		0			0		0			0		0			0		0			0
	0			0		0			0		0			0		0			0		0			0
	0			0		0			0		0			0		0			0		0			0
	0			0		0			0		0			0		0			0		0			0
	0			0		0			0		0			0		0			0		0			0
	0			0		0			0		0			0		0			0		0			0
	0			0		0			0		0			0		0			0		0			0
	0			0		0			0		0			0		0			0		0			0
	0			0		0			0		0			0		0			0		0			0
	0			0		0			0		0			0		0			0		0			0
	0			0		0			0		0			0		0			0		0			0
	0			0		0			0		0			0		0			0		0			0
	0			0		0			0		0			0		0			0		0			0
	0			0		0			0		0			0		0			0		0			0
	0			0		0			0		0			0		0			0		0			0
	0			0		0			0		0			0		0			0		0			0
	0			0		0			0		0			0		0			0		0			0
	0			0		0			0		0			0		0			0		0			0
	0			0		0			0		0			0		0			0		0			0
	0			0		0			0		0			0		0			0		0			0
	0			0		0			0		0			0		0			0		0			0
	0			0		0			0		0			0		0			0		0			0
	0			0		0			0		0			0		0			0		0			0
	0			0		0			0		0			0		0			0		0			0
	0			0		0			0		0			0		0			0		0			0
	0			0		0			0		0			0		0			0		0			0
	0			0		0			0		0			0		0			0		0			0
	0			0		0			0		0			0		0			0		0			0
	0			0		0			0		0			0		0			0		0			0
	0			0		0			0		0			0		0			0		0			0
	0			0		0			0		0			0		0			0		0			0
	0			0		0			0		0			0		0			0		0			0
	0			0		0			0		0			0		0			0		0			0
	0			0		0			0		0			0		0			0		0			0
	0			0		0			0		0			0		0			0		0			0
	0			0		0			0		0			0		0			0		0			0
	0			0		0			0		0			0		0			0		0			0
	0			0		0			0		0			0		0			0		0			0
	0			0		0			0		0			0		0			0		0			0
	0			0		0			0		0			0		0			0		0			0
	0			0		0			0		0			0		0			0		0			0
	0			0		0			0		0			0		0			0		0			0
	0			0		0			0		0			0		0			0		0			0
	0			0		0			0		0			0		0			0		0			0
	0			0		0			0		0			0		0			0		0			0
	0			0		0			0		0			0		0			0		0			0
	0			0		0			0		0			0		0			0		0			0
	0			0		0			0		0			0		0			0		0			0
	0			0		0			0		0			0		0			0		0			0
	0			0		0			0		0			0		0			0		0			0

## Sheet: raw data_prim T cell EGTA
		prim T cell cell3-1 full AB EGTA lamellipodium spot_1					prim T cell cell3-1 full AB EGTA lamellipodium spot_2					prim T cell cell3-1 full AB EGTA lamellipodium spot_3					prim T cell cell3-1 full AB EGTA lamellipodium spot_4					prim T cell cell3-1 full AB EGTA lamellipodium spot_5
		Average	174.3				Average	145.656				Average	156.289				Average	180.905				Average	145.909
		StDev	67.4402				StDev	56.1662				StDev	82.9977				StDev	58.8185				StDev	50.8537
				setp					setp					setp					setp					setp
		kPa	%				kPa	%				kPa	%				kPa	%				kPa	%
	0	0	1.23457	375.069		0	0	1.23457	261.92		0	0	1.11111	271.401		0	0	1.11111	363.63		0	0	4	851.577
	0	0.671661	0	0		0	0.534916	0	0		0	0.848626	0	0		0	0.599267	0	0		0	0.482631	0	0
	0	1.34332	0	0		0	1.06983	0	0		0	1.69725	0	0		0	1.19853	0	0		0	0.965261	0	0
	0	2.01498	0	0		0	1.60475	0	0		0	2.54588	0	0		0	1.7978	0	0		0	1.44789	0	0
	0	2.68664	0	0		0	2.13966	0	0		0	3.3945	0	0		0	2.39707	0	0		0	1.93052	0	0
	0	3.35831	0	0		0	2.67458	0	0		0	4.24313	0	0		0	2.99633	0	0		0	2.41315	0	0
	0	4.02997	0	0		0	3.20949	0	0		0	5.09175	0	0		0	3.5956	0	0		0	2.89578	0	0
	0	4.70163	0	0		0	3.74441	0	0		0	5.94038	0	0		0	4.19487	0	0		0	3.37841	0	0
	0	5.37329	0	0		0.0528312	4.27933	1.23457	246.756		0	6.78901	0	0		0	4.79413	0	0		0	3.86105	0	0
	0	6.04495	0	0		0	4.81424	0	0		0	7.63763	0	0		0	5.3934	0	0		0	4.34368	0	0
	0	6.71661	0	0		0	5.34916	0	0		0	8.48626	0	0		0	5.99266	0	0		0	4.82631	0	0
	0	7.38827	0	0		0	5.88407	0	0		0	9.33488	0	0		0	6.59193	0	0		0	5.30894	0	0
	0	8.05993	0	0		0	6.41899	0	0		0	10.1835	0	0		0	7.1912	0	0		0	5.79157	0	0
	0	8.73159	0	0		0	6.9539	0	0		0	11.0321	0	0		0	7.79046	0	0		0	6.2742	0	0
	0	9.40325	0	0		0	7.48882	0	0		0	11.8808	0	0		0	8.38973	0	0		0	6.75683	0	0
	0	10.0749	0	0		0	8.02374	0	0		0	12.7294	0	0		0	8.989	0	0		0	7.23946	0	0
	0	10.7466	0	0		0	8.55865	0	0		0	13.578	0	0		0	9.58826	0	0		0	7.72209	0	0
	0	11.4182	0	0		0	9.09357	0	0		0	14.4266	0	0		0	10.1875	0	0		0	8.20472	0	0
	0	12.0899	0	0		0	9.62848	0	0		0	15.2753	0	0		0	10.7868	0	0		0	8.68735	0	0
	0	12.7616	0	0		0	10.1634	0	0		0	16.1239	0	0		0	11.3861	0	0		0	9.16998	0	0
	0	13.4332	0	0		0	10.6983	0	0		0	16.9725	0	0		0	11.9853	0	0		0	9.65261	0	0
	0	14.1049	0	0		0	11.2332	0	0		0	17.8211	0	0		0	12.5846	0	0		0	10.1352	0	0
	0	14.7765	0	0		0	11.7682	0	0		0	18.6698	0	0		0	13.1839	0	0		0	10.6179	0	0
	0	15.4482	0	0		0	12.3031	0	0		0	19.5184	0	0		0	13.7831	0	0		0	11.1005	0	0
	0	16.1199	0	0		0	12.838	0	0		0.2263	20.367	1.11111	205.274		0	14.3824	0	0		0	11.5831	0	0
	0	16.7915	0	0		0	13.3729	0	0		0	21.2156	0	0		0	14.9817	0	0		0	12.0658	0	0
	0	17.4632	0	0		0	13.9078	0	0		0	22.0643	0	0		0	15.5809	0	0		0	12.5484	0	0
	0	18.1349	0	0		0	14.4427	0	0		0	22.9129	0	0		0	16.1802	0	0		0	13.031	0	0
	0.232179	18.8065	1.23457	298.497		0	14.9776	0	0		0	23.7615	0	0		0	16.7795	0	0		0	13.5137	0	0
	0	19.4782	0	0		0	15.5126	0	0		0	24.6101	0	0		0	17.3787	0	0		0	13.9963	0	0
	0	20.1498	0	0		0	16.0475	0	0		0	25.4588	0	0		0	17.978	0	0		0	14.4789	0	0
	0	20.8215	0	0		0	16.5824	0	0		0.292304	26.3074	1.11111	187.723		0	18.5773	0	0		0	14.9616	0	0
	0	21.4931	0	0		0	17.1173	0	0		0	27.156	0	0		0	19.1765	0	0		0	15.4442	0	0
	0	22.1648	0	0		0	17.6522	0	0		0	28.0047	0	0		0	19.7758	0	0		0	15.9268	0	0
	0	22.8365	0	0		0	18.1871	0	0		0	28.8533	0	0		0	20.3751	0	0		0	16.4094	0	0
	0	23.5081	0	0		0	18.722	0	0		0	29.7019	0	0		0	20.9743	0	0		0	16.8921	0	0
	0	24.1798	0	0		0	19.257	0	0		0	30.5505	0	0		0	21.5736	0	0		0	17.3747	0	0
	0	24.8515	0	0		0	19.7919	0	0		0	31.3991	0	0		0	22.1729	0	0		0	17.8573	0	0
	0	25.5231	0	0		0	20.3268	0	0		0	32.2478	0	0		0	22.7721	0	0		0	18.34	0	0
	0	26.1948	0	0		0	20.8617	0	0		0	33.0964	0	0		0	23.3714	0	0		0	18.8226	0	0
	0	26.8664	0	0		0	21.3966	0	0		0	33.945	0	0		0	23.9707	0	0		0	19.3052	0	0
	0	27.5381	0	0		0	21.9315	0	0		0	34.7936	0	0		0	24.5699	0	0		0	19.7879	0	0
	0	28.2098	0	0		0	22.4665	0	0		0	35.6423	0	0		0	25.1692	0	0		0	20.2705	0	0
	0	28.8814	0	0		0	23.0014	0	0		0	36.4909	0	0		0	25.7685	0	0		0	20.7531	0	0
	0	29.5531	0	0		0	23.5363	0	0		0	37.3395	0	0		0	26.3677	0	0		0	21.2357	0	0
	0	30.2248	0	0		0	24.0712	0	0		0	38.1882	0	0		0	26.967	0	0		0	21.7184	0	0
	0	30.8964	0	0		0	24.6061	0	0		0	39.0368	0	0		0	27.5663	0	0		0	22.201	0	0
	0	31.5681	0	0		0	25.141	0	0		0	39.8854	0	0		0	28.1655	0	0		0	22.6836	0	0
	0	32.2397	0	0		0	25.676	0	0		0	40.734	0	0		0	28.7648	0	0		0	23.1663	0	0
	0	32.9114	0	0		0	26.2109	0	0		0	41.5827	0	0		0	29.3641	0	0		0	23.6489	0	0
	0	33.5831	0	0		0.330195	26.7458	1.23457	174.562		0	42.4313	0	0		0	29.9633	0	0		0	24.1315	0	0
	0	34.2547	0	0		0	27.2807	0	0		0.480888	43.2799	1.11111	141.899		0	30.5626	0	0		0	24.6142	0	0
	0	34.9264	0	0		0	27.8156	0	0		0	44.1285	0	0		0	31.1619	0	0		0	25.0968	0	0
	0	35.598	0	0		0	28.3505	0	0		0	44.9772	0	0		0	31.7611	0	0		0	25.5794	0	0
	0	36.2697	0	0		0	28.8854	0	0		0	45.8258	0	0		0	32.3604	0	0		0	26.0621	0	0
	0	36.9414	0	0		0	29.4204	0	0		0	46.6744	0	0		0	32.9597	0	0		0	26.5447	0	0
	0	37.613	0	0		0	29.9553	0	0		0	47.523	0	0		0	33.5589	0	0		0	27.0273	0	0
	0	38.2847	0	0		0	30.4902	0	0		0	48.3717	0	0		0	34.1582	0	0		0	27.5099	0	0
	0	38.9563	0	0		0	31.0251	0	0		1.64068	49.2203	3.33333	382.12		0	34.7574	0	0		0	27.9926	0	0
	0	39.628	0	0		0	31.56	0	0		0	50.0689	0	0		0	35.3567	0	0		0	28.4752	0	0
	0	40.2997	0	0		0	32.0949	0	0		0	50.9175	0	0		0	35.956	0	0		0	28.9578	0	0
	0	40.9713	0	0		0	32.6299	0	0		0	51.7662	0	0		0	36.5553	0	0		0	29.4405	0	0
	0	41.643	0	0		0	33.1648	0	0		0	52.6148	0	0		0	37.1545	0	0		0	29.9231	0	0
	0	42.3146	0	0		0	33.6997	0	0		0.594038	53.4634	1.11111	117.478		0	37.7538	0	0		0	30.4057	0	0
	0	42.9863	0	0		0	34.2346	0	0		0	54.312	0	0		0	38.3531	0	0		0	30.8884	0	0
	0	43.658	0	0		0	34.7695	0	0		1.22579	55.1607	2.22222	227.263		0	38.9523	0	0		0	31.371	0	0
	0	44.3296	0	0		0	35.3044	0	0		0	56.0093	0	0		0	39.5516	0	0		0	31.8536	0	0
	0.555572	45.0013	1.23457	206.398		0	35.8394	0	0		0	56.8579	0	0		0	40.1509	0	0		0	32.3363	0	0
	0	45.673	0	0		0	36.3743	0	0		0	57.7066	0	0		0	40.7501	0	0		0	32.8189	0	0
	0	46.3446	0	0		0	36.9092	0	0		0	58.5552	0	0		0.459438	41.3494	1.11111	216.398		0	33.3015	0	0
	0	47.0163	0	0		0	37.4441	0	0		0	59.4038	0	0		0	41.9487	0	0		0	33.7841	0	0
	0	47.6879	0	0		0	37.979	0	0		0	60.2524	0	0		0	42.5479	0	0		0	34.2668	0	0
	0	48.3596	0	0		0	38.5139	0	0		0	61.1011	0	0		0	43.1472	0	0		0	34.7494	0	0
	0	49.0313	0	0		0.482085	39.0489	1.23457	140.309		0.68833	61.9497	1.11111	98.8869		0	43.7465	0	0		0	35.232	0	0
	0	49.7029	0	0		0	39.5838	0	0		0	62.7983	0	0		0	44.3457	0	0		0	35.7147	0	0
	0	50.3746	0	0		0	40.1187	0	0		0	63.6469	0	0		0	44.945	0	0		0	36.1973	0	0
	0	51.0462	0	0		0	40.6536	0	0		0	64.4955	0	0		0	45.5442	0	0		0	36.6799	0	0
	0	51.7179	0	0		0	41.1885	0	0		0.726046	65.3442	1.11111	91.8986		0	46.1435	0	0		0	37.1626	0	0
	0	52.3896	0	0		0	41.7234	0	0		0	66.1928	0	0		0	46.7428	0	0		0	37.6452	0	0
	0	53.0612	0	0		0	42.2583	0	0		0	67.0414	0	0		1.57807	47.3421	3.33333	594.637		0	38.1278	0	0
	0	53.7329	0	0		0	42.7933	0	0		0	67.8901	0	0		0	47.9413	0	0		0	38.6105	0	0
	0	54.4046	0	0		0	43.3282	0	0		0	68.7387	0	0		0	48.5406	0	0		0	39.0931	0	0
	0	55.0762	0	0		0	43.8631	0	0		1.54638	69.5873	2.22222	167.047		0	49.1399	0	0		0	39.5757	0	0
	0	55.7479	0	0		0	44.398	0	0		0	70.4359	0	0		0	49.7391	0	0		0	40.0583	0	0
	0	56.4195	0	0		0	44.9329	0	0		0	71.2845	0	0		0	50.3384	0	0		0	40.541	0	0
	0	57.0912	0	0		0	45.4678	0	0		0.80148	72.1332	1.11111	78.6903		0	50.9376	0	0		0	41.0236	0	0
	0	57.7629	0	0		0	46.0027	0	0		0	72.9818	0	0		0.572632	51.5369	1.11111	185.957		0	41.5062	0	0
	0	58.4345	0	0		0	46.5377	0	0		0	73.8304	0	0		0	52.1362	0	0		0	41.9889	0	0
	0	59.1062	0	0		0	47.0726	0	0		0	74.6791	0	0		0	52.7355	0	0		0	42.4715	0	0
	0	59.7778	0	0		0	47.6075	0	0		0	75.5277	0	0		0	53.3347	0	0		0	42.9541	0	0
	0	60.4495	0	0		0	48.1424	0	0		0	76.3763	0	0		0	53.934	0	0		0	43.4368	0	0
	0	61.1212	0	0		0	48.6773	0	0		0	77.2249	0	0		0	54.5333	0	0		0	43.9194	0	0
	0.762874	61.7928	1.23457	156.271		0	49.2122	0	0		0.867484	78.0736	1.11111	67.9732		0	55.1325	0	0		0	44.402	0	0
	0	62.4645	0	0		0	49.7472	0	0		0	78.9222	0	0		0	55.7318	0	0		0	44.8847	0	0
	0	63.1361	0	0		0	50.2821	0	0		2.65903	79.7708	3.33333	195.165		0	56.331	0	0		0	45.3673	0	0
	0	63.8078	0	0		0	50.817	0	0		0	80.6194	0	0		0	56.9303	0	0		0	45.8499	0	0
	0	64.4795	0	0		0	51.3519	0	0		0	81.4681	0	0		0	57.5296	0	0		0	46.3325	0	0
	0	65.1511	0	0		0	51.8868	0	0		0	82.3167	0	0		0	58.1288	0	0		0	46.8152	0	0
	0	65.8228	0	0		0	52.4217	0	0		0	83.1653	0	0		0	58.7281	0	0		0	47.2978	0	0
	0	66.4945	0	0		0	52.9567	0	0		0.933488	84.0139	1.11111	58.0402		0	59.3274	0	0		0	47.7804	0	0
	0	67.1661	0	0		0	53.4916	0	0		0	84.8626	0	0		0	59.9267	0	0		0	48.2631	0	0
	0	67.8378	0	0		0	54.0265	0	0		0	85.7112	0	0		0	60.5259	0	0		0	48.7457	0	0
	0	68.5094	0	0		0	54.5614	0	0		0	86.5598	0	0		0	61.1252	0	0		0	49.2283	0	0
	0	69.1811	0	0		0	55.0963	0	0		0	87.4085	0	0		0.685827	61.7244	1.11111	157.823		0	49.711	0	0
	0	69.8528	0	0		0	55.6312	0	0		0	88.2571	0	0		0	62.3237	0	0		0	50.1936	0	0
	0	70.5244	0	0		0	56.1662	0	0		0	89.1057	0	0		0	62.923	0	0		0	50.6762	0	0
	0	71.1961	0	0		0	56.7011	0	0		0	89.9543	0	0		0	63.5222	0	0		0	51.1589	0	0
	0	71.8677	0	0		0	57.236	0	0		0	90.8029	0	0		0	64.1215	0	0		0	51.6415	0	0
	0	72.5394	0	0		0	57.7709	0	0		0	91.6516	0	0		0	64.7208	0	0		0	52.1241	0	0
	0	73.2111	0	0		0	58.3058	0	0		0	92.5002	0	0		0	65.32	0	0		0	52.6067	0	0
	0	73.8827	0	0		0	58.8407	0	0		0	93.3488	0	0		0	65.9193	0	0		0	53.0894	0	0
	0	74.5544	0	0		0.733033	59.3756	1.23457	91.9041		0	94.1975	0	0		0	66.5186	0	0		0	53.572	0	0
	0	75.226	0	0		0	59.9106	0	0		0	95.0461	0	0		0	67.1178	0	0		0	54.0546	0	0
	0	75.8977	0	0		0	60.4455	0	0		0	95.8947	0	0		0	67.7171	0	0		0	54.5373	0	0
	0	76.5694	0	0		0	60.9804	0	0		2.14985	96.7433	2.22222	78.7918		0	68.3164	0	0		0	55.0199	0	0
	0	77.241	0	0		0	61.5153	0	0		0	97.592	0	0		0	68.9156	0	0		0	55.5025	0	0
	0	77.9127	0	0		0	62.0502	0	0		0	98.4406	0	0		0	69.5149	0	0		0	55.9852	0	0
	0	78.5843	0	0		0	62.5851	0	0		0	99.2892	0	0		0	70.1142	0	0		0	56.4678	0	0
	0	79.256	0	0		0	63.12	0	0		0	100.138	0	0		0	70.7134	0	0		0	56.9504	0	0
	0.986761	79.9277	1.23457	109.953		0	63.655	0	0		0	100.987	0	0		0	71.3127	0	0		0	57.4331	0	0
	0	80.5993	0	0		0	64.1899	0	0		0	101.835	0	0		0	71.912	0	0		0	57.9157	0	0
	0	81.271	0	0		0	64.7248	0	0		0	102.684	0	0		0	72.5113	0	0		0	58.3983	0	0
	1.01164	81.9427	1.23457	105.308		0	65.2597	0	0		0	103.532	0	0		0	73.1105	0	0		0	58.8809	0	0
	0	82.6143	0	0		0	65.7946	0	0		0	104.381	0	0		0	73.7098	0	0		0	59.3636	0	0
	0	83.286	0	0		0	66.3295	0	0		1.16922	105.23	1.11111	28.9668		0	74.309	0	0		0	59.8462	0	0
	1.03651	83.9576	1.23457	100.763		0	66.8645	0	0		0	106.078	0	0		0	74.9083	0	0		0	60.3288	0	0
	0	84.6293	0	0		0	67.3994	0	0		3.56423	106.927	3.33333	81.2194		0	75.5076	0	0		0	60.8115	0	0
	0	85.301	0	0		0	67.9343	0	0		0	107.775	0	0		0	76.1068	0	0		0	61.2941	0	0
	0	85.9726	0	0		0	68.4692	0	0		2.41387	108.624	2.22222	50.4867		0	76.7061	0	0		0	61.7767	0	0
	0	86.6443	0	0		0	69.0041	0	0		0	109.473	0	0		0	77.3054	0	0		0	62.2594	0	0
	0	87.3159	0	0		0	69.5391	0	0		0	110.321	0	0		0	77.9046	0	0		0	62.742	0	0
	0	87.9876	0	0		0	70.074	0	0		1.23522	111.17	1.11111	22.6187		0	78.5039	0	0		0	63.2246	0	0
	0	88.6593	0	0		0	70.6089	0	0		0	112.019	0	0		0	79.1032	0	0		0	63.7073	0	0
	0	89.3309	0	0		0	71.1438	0	0		0	112.867	0	0		0	79.7024	0	0		0	64.1899	0	0
	0	90.0026	0	0		0	71.6787	0	0		0	113.716	0	0		0	80.3017	0	0		0	64.6725	0	0
	1.11944	90.6742	1.23457	86.3371		0	72.2136	0	0		0	114.564	0	0		0	80.901	0	0		0	65.1552	0	0
	0	91.3459	0	0		0	72.7485	0	0		2.56474	115.413	2.22222	37.1289		0	81.5002	0	0		0	65.6378	0	0
	0	92.0176	0	0		0	73.2835	0	0		0	116.262	0	0		0	82.0995	0	0		0	66.1204	0	0
	0	92.6892	0	0		0	73.8184	0	0		1.30123	117.11	1.11111	17.0548		0	82.6988	0	0		0	66.603	0	0
	0	93.3609	0	0		0	74.3533	0	0		0	117.959	0	0		0	83.298	0	0		0	67.0857	0	0
	0	94.0326	0	0		0	74.8882	0	0		1.32008	118.808	1.11111	15.6091		0	83.8973	0	0		0	67.5683	0	0
	0	94.7042	0	0		0	75.4231	0	0		0	119.656	0	0		0	84.4966	0	0		0	68.0509	0	0
	0	95.3759	0	0		0.937754	75.958	1.23457	59.9722		0	120.505	0	0		0	85.0958	0	0		0	68.5336	0	0
	0	96.0475	0	0		0	76.4929	0	0		1.34837	121.353	1.11111	13.5606		0	85.6951	0	0		0	69.0162	0	0
	0	96.7192	0	0		0	77.0279	0	0		0	122.202	0	0		0	86.2944	0	0		0	69.4988	0	0
	0	97.3909	0	0		0	77.5628	0	0		2.73446	123.051	2.22222	24.5501		0	86.8936	0	0		0	69.9814	0	0
	0	98.0625	0	0		0	78.0977	0	0		0	123.899	0	0		0	87.4929	0	0		0	70.4641	0	0
	0	98.7342	0	0		0	78.6326	0	0		0	124.748	0	0		0.978802	88.0922	1.11111	95.714		0	70.9467	0	0
	0	99.4058	0	0		0	79.1675	0	0		1.39552	125.597	1.11111	10.4666		0	88.6914	0	0		0	71.4293	0	0
	0	100.078	0	0		0	79.7024	0	0		0	126.445	0	0		0	89.2907	0	0		0	71.912	0	0
	1.24382	100.749	1.23457	66.787		0.990585	80.2374	1.23457	52.8339		1.41438	127.294	1.11111	9.341		0	89.89	0	0		0	72.3946	0	0
	0	101.421	0	0		0	80.7723	0	0		0	128.143	0	0		0	90.4892	0	0		0	72.8772	0	0
	0	102.093	0	0		0	81.3072	0	0		0	128.991	0	0		0	91.0885	0	0		0	73.3599	0	0
	2.53739	102.764	2.46914	126.356		0	81.8421	0	0		2.88533	129.84	2.22222	15.5454		0	91.6878	0	0		0	73.8425	0	0
	0	103.436	0	0		2.034	82.377	2.46914	98.8686		0	130.688	0	0		0	92.287	0	0		0	74.3251	0	0
	0	104.108	0	0		0	82.9119	0	0		0	131.537	0	0		0	92.8863	0	0		0	74.8078	0	0
	0	104.779	0	0		0	83.4468	0	0		0	132.386	0	0		0	93.4856	0	0		0	75.2904	0	0
	0	105.451	0	0		0	83.9818	0	0		1.48038	133.234	1.11111	5.90559		0	94.0848	0	0		0	75.773	0	0
	0	106.122	0	0		1.04342	84.5167	1.23457	46.1477		0	134.083	0	0		0	94.6841	0	0		0	76.2557	0	0
	0	106.794	0	0		0	85.0516	0	0		0	134.931	0	0		0	95.2834	0	0		0	76.7383	0	0
	0	107.466	0	0		0	85.5865	0	0		1.50867	135.78	1.11111	4.67329		0	95.8826	0	0		0	77.2209	0	0
	0	108.137	0	0		0	86.1214	0	0		0	136.629	0	0		0	96.4819	0	0		0	77.7036	0	0
	0	108.809	0	0		0	86.6564	0	0		1.52753	137.477	1.11111	3.93177		0	97.0812	0	0		0	78.1862	0	0
	0	109.481	0	0		0	87.1913	0	0		0	138.326	0	0		0	97.6804	0	0		0	78.6688	0	0
	0	110.152	0	0		0	87.7262	0	0		0	139.175	0	0		0	98.2797	0	0		0	79.1514	0	0
	0	110.824	0	0		0	88.2611	0	0		1.55581	140.023	1.11111	2.93957		0	98.879	0	0		0	79.6341	0	0
	0	111.496	0	0		0	88.796	0	0		0	140.872	0	0		0	99.4782	0	0		0	80.1167	0	0
	0	112.167	0	0		0	89.3309	0	0		1.57467	141.72	1.11111	2.35809		0	100.078	0	0		0	80.5993	0	0
	4.17923	112.839	3.7037	139.906		0	89.8658	0	0		0	142.569	0	0		0	100.677	0	0		0	81.082	0	0
	0	113.511	0	0		1.11606	90.4008	1.23457	37.6925		0	143.418	0	0		0	101.276	0	0		0	81.5646	0	0
	0	114.182	0	0		0	90.9357	0	0		0	144.266	0	0		0	101.875	0	0		0	82.0472	0	0
	1.41795	114.854	1.23457	43.6278		0	91.4706	0	0		0	145.115	0	0		0	102.475	0	0		0	82.5298	0	0
	0	115.526	0	0		0	92.0055	0	0		1.62182	145.964	1.11111	1.1845		0	103.074	0	0		0	83.0125	0	0
	0	116.197	0	0		4.5699	92.5404	4.93827	139.32		0	146.812	0	0		0	103.673	0	0		0	83.4951	0	0
	0	116.869	0	0		0	93.0753	0	0		0	147.661	0	0		0	104.272	0	0		0	83.9778	0	0
	0	117.541	0	0		0	93.6102	0	0		0	148.51	0	0		1.16524	104.872	1.11111	64.2346		0	84.4604	0	0
	0	118.212	0	0		0	94.1452	0	0		0	149.358	0	0		0	105.471	0	0		0	84.943	0	0
	1.4677	118.884	1.23457	37.913		0	94.6801	0	0		0	150.207	0	0		0	106.07	0	0		0	85.4256	0	0
	0	119.556	0	0		0	95.215	0	0		0	151.055	0	0		0	106.669	0	0		0	85.9083	0	0
	0	120.227	0	0		0	95.7499	0	0		0	151.904	0	0		0	107.269	0	0		0	86.3909	0	0
	0	120.899	0	0		0	96.2848	0	0		0	152.753	0	0		0	107.868	0	0		0	86.8735	0	0
	3.00175	121.571	2.46914	68.6519		2.39061	96.8197	2.46914	58.8874		0	153.601	0	0		0	108.467	0	0		0	87.3562	0	0
	0	122.242	0	0		0	97.3547	0	0		1.71611	154.45	1.11111	0.0375625		1.21185	109.067	1.11111	57.3422		0	87.8388	0	0
	0	122.914	0	0		0	97.8896	0	0		0	155.298	0	0		0	109.666	0	0		0	88.3214	0	0
	1.52575	123.586	1.23457	31.7527		0	98.4245	0	0		1.73497	156.147	1.11111	0.000222308		0	110.265	0	0		0	88.8041	0	0
	0	124.257	0	0		0	98.9594	0	0		0	156.996	0	0		0	110.864	0	0		0	89.2867	0	0
	0	124.929	0	0		0	99.4943	0	0		1.75383	157.844	1.11111	0.0268964		0	111.464	0	0		0	89.7693	0	0
	1.55062	125.601	1.23457	29.2797		0	100.029	0	0		0	158.693	0	0		0	112.063	0	0		0	90.2519	0	0
	0	126.272	0	0		1.24153	100.564	1.23457	25.1016		0	159.542	0	0		0	112.662	0	0		0	90.7346	0	0
	0	126.944	0	0		0	101.099	0	0		0	160.39	0	0		0	113.261	0	0		0	91.2172	0	0
	1.5755	127.616	1.23457	26.9068		0	101.634	0	0		0	161.239	0	0		0	113.861	0	0		0	91.6998	0	0
	0	128.287	0	0		0	102.169	0	0		0	162.088	0	0		0	114.46	0	0		0	92.1825	0	0
	0	128.959	0	0		0	102.704	0	0		0	162.936	0	0		1.27844	115.059	1.11111	48.1744		3.7066	92.6651	4	113.396
	0	129.631	0	0		0	103.239	0	0		0	163.785	0	0		0	115.658	0	0		0	93.1477	0	0
	0	130.302	0	0		0	103.774	0	0		3.65852	164.633	2.22222	1.54748		0	116.258	0	0		0	93.6304	0	0
	0	130.974	0	0		0	104.309	0	0		0	165.482	0	0		1.29841	116.857	1.11111	45.5797		0	94.113	0	0
	1.62525	131.646	1.23457	22.4619		2.58873	104.844	2.46914	41.1266		5.54435	166.331	3.33333	3.36143		0	117.456	0	0		0	94.5956	0	0
	0	132.317	0	0		0	105.378	0	0		0	167.179	0	0		0	118.055	0	0		0	95.0782	0	0
	0	132.989	0	0		0	105.913	0	0		0	168.028	0	0		0	118.655	0	0		0	95.5609	0	0
	0	133.661	0	0		0	106.448	0	0		1.87641	168.876	1.11111	1.76063		1.32504	119.254	1.11111	42.2319		0	96.0435	0	0
	0	134.332	0	0		1.32078	106.983	1.23457	18.4637		0	169.725	0	0		0	119.853	0	0		3.86105	96.5262	4	97.5463
	0	135.004	0	0		0	107.518	0	0		1.89526	170.574	1.11111	2.26743		0	120.453	0	0		0	97.0088	0	0
	0	135.675	0	0		0	108.053	0	0		0	171.422	0	0		0	121.052	0	0		0	97.4914	0	0
	0	136.347	0	0		0	108.588	0	0		1.91412	172.271	1.11111	2.83821		0	121.651	0	0		0	97.974	0	0
	0	137.019	0	0		2.69439	109.123	2.46914	32.9542		0	173.12	0	0		0	122.25	0	0		3.93827	98.4567	4	90.0687
	5.09965	137.69	3.7037	49.6397		0	109.658	0	0		0	173.968	0	0		0	122.85	0	0		0	98.9393	0	0
	0	138.362	0	0		0	110.193	0	0		7.76964	174.817	4.44444	15.2578		0	123.449	0	0		0	99.4219	0	0
	0	139.034	0	0		1.36701	110.728	1.23457	15.0613		0	175.666	0	0		0	124.048	0	0		0	99.9046	0	0
	0	139.706	0	0		0	111.263	0	0		0	176.514	0	0		0	124.647	0	0		0	100.387	0	0
	0	140.377	0	0		0	111.797	0	0		0	177.363	0	0		1.39163	125.247	1.11111	34.4208		8.06958	100.87	8	162.282
	0	141.049	0	0		0	112.332	0	0		0	178.211	0	0		0	125.846	0	0		0	101.353	0	0
	1.74964	141.72	1.23457	13.1042		0	112.867	0	0		0	179.06	0	0		0	126.445	0	0		0	101.835	0	0
	0	142.392	0	0		0	113.402	0	0		0	179.909	0	0		0	127.044	0	0		0	102.318	0	0
	0	143.064	0	0		0	113.937	0	0		0	180.757	0	0		0	127.644	0	0		4.11201	102.8	4	74.3341
	3.54902	143.736	2.46914	23.0667		0	114.472	0	0		0	181.606	0	0		0	128.243	0	0		0	103.283	0	0
	0	144.407	0	0		0	115.007	0	0		0	182.454	0	0		0	128.842	0	0		0	103.766	0	0
	0	145.079	0	0		0	115.542	0	0		0	183.303	0	0		0	129.442	0	0		0	104.248	0	0
	0	145.75	0	0		0	116.077	0	0		0	184.152	0	0		0	130.041	0	0		0	104.731	0	0
	0	146.422	0	0		0	116.612	0	0		0	185	0	0		0	130.64	0	0		0	105.213	0	0
	0	147.094	0	0		1.44625	117.147	1.23457	10.0342		0	185.849	0	0		0	131.239	0	0		0	105.696	0	0
	3.64853	147.765	2.46914	17.3851		0	117.681	0	0		0	186.698	0	0		0	131.839	0	0		0	106.179	0	0
	0	148.437	0	0		0	118.216	0	0		0	187.546	0	0		0	132.438	0	0		0	106.661	0	0
	0	149.109	0	0		0	118.751	0	0		0	188.395	0	0		0	133.037	0	0		0	107.144	0	0
	0	149.78	0	0		0	119.286	0	0		4.20541	189.244	2.22222	24.134		0	133.636	0	0		0	107.627	0	0
	0	150.452	0	0		0	119.821	0	0		0	190.092	0	0		0	134.236	0	0		0	108.109	0	0
	0	151.124	0	0		0	120.356	0	0		0	190.941	0	0		0	134.835	0	0		0	108.592	0	0
	0	151.795	0	0		0	120.891	0	0		0	191.789	0	0		0	135.434	0	0		0	109.075	0	0
	0	152.467	0	0		2.99817	121.426	2.46914	14.4957		0	192.638	0	0		0	136.034	0	0		0	109.557	0	0
	0	153.139	0	0		0	121.961	0	0		0	193.487	0	0		0	136.633	0	0		0	110.04	0	0
	1.89889	153.81	1.23457	5.18311		0	122.496	0	0		0	194.335	0	0		0	137.232	0	0		0	110.522	0	0
	0	154.482	0	0		0	123.031	0	0		2.16871	195.184	1.11111	16.8094		0	137.831	0	0		0	111.005	0	0
	0	155.154	0	0		0	123.566	0	0		0	196.032	0	0		0	138.431	0	0		0	111.488	0	0
	0	155.825	0	0		0	124.1	0	0		0	196.881	0	0		0	139.03	0	0		0	111.97	0	0
	0	156.497	0	0		0	124.635	0	0		0	197.73	0	0		1.55143	139.629	1.11111	18.9302		0	112.453	0	0
	0	157.169	0	0		1.54531	125.17	1.23457	5.18082		0	198.578	0	0		0	140.228	0	0		0	112.936	0	0
	0	157.84	0	0		0	125.705	0	0		2.21586	199.427	1.11111	20.677		0	140.828	0	0		0	113.418	0	0
	0	158.512	0	0		0	126.24	0	0		0	200.276	0	0		0	141.427	0	0		0	113.901	0	0
	0	159.184	0	0		0	126.775	0	0		4.46943	201.124	2.22222	44.6721		0	142.026	0	0		0	114.383	0	0
	0	159.855	0	0		0	127.31	0	0		0	201.973	0	0		0	142.625	0	0		0	114.866	0	0
	3.96363	160.527	2.46914	4.68398		0	127.845	0	0		0	202.821	0	0		0	143.225	0	0		0	115.349	0	0
	0	161.199	0	0		0	128.38	0	0		2.263	203.67	1.11111	24.9447		0	143.824	0	0		0	115.831	0	0
	0	161.87	0	0		0	128.915	0	0		0	204.519	0	0		0	144.423	0	0		0	116.314	0	0
	2.00669	162.542	1.23457	1.70686		1.59814	129.45	1.23457	3.24239		2.28186	205.367	1.11111	26.7637		0	145.023	0	0		0	116.797	0	0
	0	163.214	0	0		0	129.984	0	0		0	206.216	0	0		3.23604	145.622	2.22222	27.665		4.69117	117.279	4	32.7862
	0	163.885	0	0		0	130.519	0	0		0	207.065	0	0		0	146.221	0	0		0	117.762	0	0
	2.03157	164.557	1.23457	1.17198		0	131.054	0	0		4.6203	207.913	2.22222	59.2248		0	146.82	0	0		0	118.245	0	0
	0	165.229	0	0		0	131.589	0	0		0	208.762	0	0		0	147.42	0	0		0	118.727	0	0
	0	165.9	0	0		0	132.124	0	0		0	209.611	0	0		0	148.019	0	0		4.76839	119.21	4	28.5137
	2.05644	166.572	1.23457	0.737367		0	132.659	0	0		0	210.459	0	0		0	148.618	0	0		0	119.692	0	0
	0	167.244	0	0		0	133.194	0	0		2.34786	211.308	1.11111	33.6346		0	149.217	0	0		0	120.175	0	0
	0	167.915	0	0		3.30195	133.729	2.46914	3.51224		0	212.156	0	0		1.66463	149.817	1.11111	10.7389		0	120.658	0	0
	4.16264	168.587	2.46914	0.805972		0	134.264	0	0		0	213.005	0	0		0	150.416	0	0		0	121.14	0	0
	0	169.259	0	0		0	134.799	0	0		0	213.854	0	0		0	151.015	0	0		0	121.623	0	0
	0	169.93	0	0		0	135.334	0	0		0	214.702	0	0		0	151.614	0	0		0	122.106	0	0
	0	170.602	0	0		3.35478	135.869	2.46914	2.36506		0	215.551	0	0		0	152.214	0	0		0	122.588	0	0
	0	171.274	0	0		0	136.404	0	0		0	216.4	0	0		0	152.813	0	0		0	123.071	0	0
	0	171.945	0	0		0	136.938	0	0		0	217.248	0	0		0	153.412	0	0		0	123.553	0	0
	2.13107	172.617	1.23457	0.0349817		6.78881	137.473	4.93827	3.30616		0	218.097	0	0		3.42248	154.012	2.22222	16.0727		0	124.036	0	0
	0	173.288	0	0		0	138.008	0	0		0	218.945	0	0		0	154.611	0	0		0	124.519	0	0
	0	173.96	0	0		0	138.543	0	0		2.44216	219.794	1.11111	44.8105		0	155.21	0	0		0	125.001	0	0
	4.3119	174.632	2.46914	0.00271658		0	139.078	0	0		0	220.643	0	0		0	155.809	0	0		0	125.484	0	0
	0	175.304	0	0		3.44723	139.613	2.46914	0.901551		0	221.491	0	0		3.47574	156.409	2.22222	13.3353		0	125.967	0	0
	0	175.975	0	0		0	140.148	0	0		2.47044	222.34	1.11111	48.4753		0	157.008	0	0		0	126.449	0	0
	6.54248	176.647	3.7037	0.203962		0	140.683	0	0		0	223.189	0	0		0	157.607	0	0		0	126.932	0	0
	0	177.319	0	0		0	141.218	0	0		0	224.037	0	0		5.27354	158.206	3.33333	17.1747		0	127.415	0	0
	0	177.99	0	0		1.75003	141.753	1.23457	0.188055		0	224.886	0	0		0	158.806	0	0		0	127.897	0	0
	4.4114	178.662	2.46914	0.469716		0	142.288	0	0		0	225.734	0	0		0	159.405	0	0		0	128.38	0	0
	0	179.333	0	0		0	142.822	0	0		0	226.583	0	0		0	160.004	0	0		0	128.862	0	0
	0	180.005	0	0		0	143.357	0	0		0	227.432	0	0		0	160.603	0	0		5.1738	129.345	4	10.9745
	2.23058	180.677	1.23457	0.501987		1.77645	143.892	1.23457	0.0383847		2.53645	228.28	1.11111	57.5868		0	161.203	0	0		0	129.828	0	0
	0	181.349	0	0		0	144.427	0	0		0	229.129	0	0		0	161.802	0	0		0	130.31	0	0
	0	182.02	0	0		0	144.962	0	0		2.55531	229.978	1.11111	60.3342		1.80446	162.401	1.11111	3.80443		0	130.793	0	0
	2.25545	182.692	1.23457	0.869369		0	145.497	0	0		0	230.826	0	0		0	163	0	0		0	131.276	0	0
	0	183.363	0	0		3.60573	146.032	2.46914	0.00349853		0	231.675	0	0		0	163.6	0	0		0	131.758	0	0
	0	184.035	0	0		0	146.567	0	0		0	232.523	0	0		3.64887	164.199	2.22222	6.20217		0	132.241	0	0
	4.56066	184.707	2.46914	2.67401		0	147.102	0	0		0	233.372	0	0		0	164.798	0	0		0	132.724	0	0
	0	185.378	0	0		0	147.637	0	0		2.60245	234.221	1.11111	67.4824		0	165.398	0	0		0	133.206	0	0
	0	186.05	0	0		1.82928	148.172	1.23457	0.0781586		0	235.069	0	0		0	165.997	0	0		0	133.689	0	0
	4.61042	186.722	2.46914	3.80978		0	148.707	0	0		0	235.918	0	0		3.70214	166.596	2.22222	4.55002		0	134.171	0	0
	0	187.393	0	0		0	149.242	0	0		2.63074	236.767	1.11111	71.9635		0	167.195	0	0		0	134.654	0	0
	0	188.065	0	0		0	149.776	0	0		0	237.615	0	0		0	167.795	0	0		0	135.137	0	0
	0	188.737	0	0		0	150.311	0	0		0	238.464	0	0		1.87104	168.394	1.11111	1.73926		0	135.619	0	0
	4.67675	189.408	2.46914	5.63599		0	150.846	0	0		0	239.312	0	0		0	168.993	0	0		0	136.102	0	0
	0	190.08	0	0		0	151.381	0	0		0	240.161	0	0		0	169.592	0	0		0	136.584	0	0
	0	190.752	0	0		1.87551	151.916	1.23457	0.483878		0	241.01	0	0		0	170.192	0	0		0	137.067	0	0
	4.7265	191.423	2.46914	7.2396		0	152.451	0	0		0	241.858	0	0		1.89768	170.791	1.11111	1.13664		0	137.55	0	0
	0	192.095	0	0		0	152.986	0	0		2.69674	242.707	1.11111	82.9794		0	171.39	0	0		0	138.032	0	0
	0	192.767	0	0		0	153.521	0	0		0	243.556	0	0		0	171.989	0	0		0	138.515	0	0
	0	193.438	0	0		3.80384	154.056	2.46914	1.74227		0	244.404	0	0		0	172.589	0	0		0	138.998	0	0
	0	194.11	0	0		0	154.591	0	0		0	245.253	0	0		0	173.188	0	0		0	139.48	0	0
	0	194.782	0	0		0	155.126	0	0		0	246.101	0	0		0	173.787	0	0		0	139.963	0	0
	0	195.453	0	0		0	155.661	0	0		0	246.95	0	0		0	174.387	0	0		0	140.446	0	0
	0	196.125	0	0		0	156.195	0	0		0	247.799	0	0		5.83286	174.986	3.33333	1.16798		0	140.928	0	0
	0	196.797	0	0		0	156.73	0	0		0	248.647	0	0		0	175.585	0	0		0	141.411	0	0
	4.87576	197.468	2.46914	13.2533		0	157.265	0	0		0	249.496	0	0		0	176.184	0	0		0	141.893	0	0
	0	198.14	0	0		0	157.8	0	0		0	250.345	0	0		0	176.784	0	0		0	142.376	0	0
	0	198.812	0	0		3.90951	158.335	2.46914	3.96963		0	251.193	0	0		0	177.383	0	0		0	142.859	0	0
	0	199.483	0	0		0	158.87	0	0		0	252.042	0	0		0	177.982	0	0		0	143.341	0	0
	0	200.155	0	0		0	159.405	0	0		0	252.891	0	0		5.95271	178.581	3.33333	0.180005		11.5059	143.824	8	0.347751
	0	200.827	0	0		0	159.94	0	0		0	253.739	0	0		0	179.181	0	0		0	144.307	0	0
	0	201.498	0	0		5.94351	160.475	3.7037	8.13357		0	254.588	0	0		0	179.78	0	0		0	144.789	0	0
	0	202.17	0	0		0	161.01	0	0		0	255.436	0	0		0	180.379	0	0		0	145.272	0	0
	0	202.842	0	0		0	161.544	0	0		0	256.285	0	0		10.0544	180.978	5.55556	0.000298324		0	145.755	0	0
	0	203.513	0	0		0	162.079	0	0		2.85704	257.134	1.11111	112.997		0	181.578	0	0		0	146.237	0	0
	0	204.185	0	0		0	162.614	0	0		0	257.982	0	0		0	182.177	0	0		0	146.72	0	0
	0	204.857	0	0		0	163.149	0	0		2.8759	258.831	1.11111	116.832		8.12339	182.776	4.44444	0.155597		0	147.202	0	0
	0	205.528	0	0		0	163.684	0	0		0	259.68	0	0		0	183.375	0	0		0	147.685	0	0
	0	206.2	0	0		0	164.219	0	0		0	260.528	0	0		0	183.975	0	0		0	148.168	0	0
	0	206.872	0	0		0	164.754	0	0		0	261.377	0	0		0	184.574	0	0		0	148.65	0	0
	5.12453	207.543	2.46914	27.2865		0	165.289	0	0		0	262.225	0	0		2.05748	185.173	1.11111	0.202406		0	149.133	0	0
	0	208.215	0	0		0	165.824	0	0		0	263.074	0	0		0	185.773	0	0		0	149.615	0	0
	0	208.887	0	0		2.05381	166.359	1.23457	5.29165		0	263.923	0	0		0	186.372	0	0		0	150.098	0	0
	0	209.558	0	0		0	166.894	0	0		0	264.771	0	0		0	186.971	0	0		0	150.581	0	0
	0	210.23	0	0		0	167.429	0	0		0	265.62	0	0		0	187.57	0	0		0	151.063	0	0
	0	210.902	0	0		0	167.964	0	0		0	266.469	0	0		0	188.17	0	0		0	151.546	0	0
	0	211.573	0	0		2.08023	168.499	1.23457	6.44196		0	267.317	0	0		0	188.769	0	0		0	152.029	0	0
	0	212.245	0	0		0	169.033	0	0		0	268.166	0	0		6.31227	189.368	3.33333	2.3874		0	152.511	0	0
	0	212.917	0	0		0	169.568	0	0		5.97809	269.014	2.22222	282.38		0	189.968	0	0		0	152.994	0	0
	2.63689	213.588	1.23457	19.0561		0	170.103	0	0		0	269.863	0	0		0	190.567	0	0		0	153.477	0	0
	0	214.26	0	0		2.10664	170.638	1.23457	7.70526		0	270.712	0	0		2.12407	191.166	1.11111	1.16982		6.15837	153.959	4	2.59228
	0	214.931	0	0		0	171.173	0	0		0	271.56	0	0		0	191.765	0	0		0	154.442	0	0
	0	215.603	0	0		0	171.708	0	0		0	272.409	0	0		0	192.364	0	0		0	154.924	0	0
	0	216.275	0	0		0	172.243	0	0		0	273.257	0	0		2.14404	192.964	1.11111	1.61566		0	155.407	0	0
	0	216.946	0	0		6.39918	172.778	3.7037	27.245		0	274.106	0	0		0	193.563	0	0		0	155.89	0	0
	0	217.618	0	0		0	173.313	0	0		0	274.955	0	0		0	194.162	0	0		0	156.372	0	0
	0	218.29	0	0		0	173.848	0	0		0	275.803	0	0		0	194.762	0	0		0	156.855	0	0
	0	218.962	0	0		0	174.382	0	0		0	276.652	0	0		6.51203	195.361	3.33333	6.96555		0	157.338	0	0
	2.71152	219.633	1.23457	25.3714		0	174.917	0	0		0	277.501	0	0		0	195.96	0	0		0	157.82	0	0
	0	220.305	0	0		0	175.452	0	0		0	278.349	0	0		0	196.559	0	0		0	158.303	0	0
	0	220.976	0	0		0	175.987	0	0		0	279.198	0	0		6.57196	197.159	3.33333	8.80585		0	158.786	0	0
	2.7364	221.648	1.23457	27.6769		2.17929	176.522	1.23457	11.7623		0	280.046	0	0		0	197.758	0	0		0	159.268	0	0
	0	222.32	0	0		0	177.057	0	0		0	280.895	0	0		0	198.357	0	0		0	159.751	0	0
	0	222.992	0	0		0	177.592	0	0		0	281.744	0	0		0	198.957	0	0		6.40934	160.233	4	8.20763
	0	223.663	0	0		0	178.127	0	0		0	282.592	0	0		0	199.556	0	0		0	160.716	0	0
	0	224.335	0	0		6.6171	178.662	3.7037	40.3485		0	283.441	0	0		0	200.155	0	0		0	161.199	0	0
	0	225.006	0	0		0	179.197	0	0		0	284.29	0	0		0	200.754	0	0		0	161.681	0	0
	0	225.678	0	0		0	179.732	0	0		0	285.138	0	0		2.23726	201.353	1.11111	4.64591		6.48656	162.164	4	10.569
	2.79444	226.35	1.23457	33.4464		0	180.267	0	0		0	285.987	0	0		0	201.953	0	0		0	162.647	0	0
	0	227.021	0	0		0	180.802	0	0		0	286.836	0	0		0	202.552	0	0		0	163.129	0	0
	0	227.693	0	0		0	181.336	0	0		0	287.684	0	0		0	203.151	0	0		0	163.612	0	0
	0	228.365	0	0		0	181.871	0	0		0	288.533	0	0		2.2639	203.751	1.11111	5.79901		0	164.094	0	0
	0	229.036	0	0		0	182.406	0	0		0	289.381	0	0		0	204.35	0	0		6.58308	164.577	4	13.94
	0	229.708	0	0		2.25853	182.941	1.23457	17.1632		0	290.23	0	0		0	204.949	0	0		0	165.06	0	0
	2.84419	230.38	1.23457	38.826		0	183.476	0	0		0	291.079	0	0		6.85161	205.548	3.33333	20.2429		0	165.542	0	0
	0	231.051	0	0		0	184.011	0	0		0	291.927	0	0		0	206.148	0	0		0	166.025	0	0
	0	231.723	0	0		0	184.546	0	0		0	292.776	0	0		0	206.747	0	0		6.6603	166.508	4	16.9722
	2.86907	232.395	1.23457	41.6663		0	185.081	0	0		3.26249	293.625	1.11111	209.568		2.30385	207.346	1.11111	7.76806		0	166.99	0	0
	0	233.066	0	0		0	185.616	0	0		0	294.473	0	0		0	207.946	0	0		0	167.473	0	0
	0	233.738	0	0		0	186.151	0	0		0	295.322	0	0		0	208.545	0	0		0	167.956	0	0
	0	234.41	0	0		0	186.686	0	0		3.29078	296.17	1.11111	217.41		0	209.144	0	0		0	168.438	0	0
	0	235.081	0	0		2.31136	187.22	1.23457	21.3289		0	297.019	0	0		6.99144	209.743	3.33333	27.7212		0	168.921	0	0
	0	235.753	0	0		0	187.755	0	0		0	297.868	0	0		0	210.343	0	0		0	169.403	0	0
	5.83765	236.425	2.46914	95.2951		0	188.29	0	0		0	298.716	0	0		0	210.942	0	0		0	169.886	0	0
	0	237.096	0	0		4.66235	188.825	2.46914	46.0154		0	299.565	0	0		0	211.541	0	0		0	170.369	0	0
	0	237.768	0	0		0	189.36	0	0		0	300.413	0	0		0	212.14	0	0		0	170.851	0	0
	2.9437	238.44	1.23457	50.7886		0	189.895	0	0		0	301.262	0	0		0	212.74	0	0		0	171.334	0	0
	0	239.111	0	0		0	190.43	0	0		0	302.111	0	0		0	213.339	0	0		0	171.816	0	0
	0	239.783	0	0		0	190.965	0	0		0	302.959	0	0		0	213.938	0	0		0	172.299	0	0
	0	240.455	0	0		0	191.5	0	0		0	303.808	0	0		0	214.537	0	0		0	172.782	0	0
	0	241.126	0	0		0	192.035	0	0		0	304.657	0	0		0	215.137	0	0		0	173.264	0	0
	0	241.798	0	0		0	192.57	0	0		0	305.505	0	0		2.39707	215.736	1.11111	13.4797		0	173.747	0	0
	2.99345	242.47	1.23457	57.3712		0	193.105	0	0		0	306.354	0	0		0	216.335	0	0		0	174.23	0	0
	0	243.141	0	0		0	193.639	0	0		0	307.202	0	0		0	216.935	0	0		0	174.712	0	0
	0	243.813	0	0		0	194.174	0	0		3.42279	308.051	1.11111	255.91		0	217.534	0	0		0	175.195	0	0
	0	244.485	0	0		0	194.709	0	0		0	308.9	0	0		0	218.133	0	0		0	175.678	0	0
	0	245.156	0	0		2.41042	195.244	1.23457	30.3584		0	309.748	0	0		0	218.732	0	0		0	176.16	0	0
	0	245.828	0	0		0	195.779	0	0		0	310.597	0	0		0	219.332	0	0		0	176.643	0	0
	0	246.5	0	0		0	196.314	0	0		0	311.446	0	0		0	219.931	0	0		0	177.125	0	0
	0	247.171	0	0		0	196.849	0	0		3.46994	312.294	1.11111	270.42		0	220.53	0	0		0	177.608	0	0
	0	247.843	0	0		0	197.384	0	0		0	313.143	0	0		0	221.129	0	0		0	178.091	0	0
	0	248.515	0	0		0	197.919	0	0		0	313.991	0	0		2.46365	221.729	1.11111	18.5172		7.14294	178.573	4	42.6787
	0	249.186	0	0		0	198.454	0	0		0	314.84	0	0		0	222.328	0	0		0	179.056	0	0
	0	249.858	0	0		0	198.989	0	0		0	315.689	0	0		0	222.927	0	0		0	179.539	0	0
	0	250.53	0	0		4.92651	199.524	2.46914	71.6485		0	316.537	0	0		0	223.526	0	0		0	180.021	0	0
	0	251.201	0	0		0	200.059	0	0		0	317.386	0	0		2.49029	224.126	1.11111	20.7557		0	180.504	0	0
	0	251.873	0	0		0	200.593	0	0		0	318.235	0	0		0	224.725	0	0		0	180.987	0	0
	0	252.544	0	0		0	201.128	0	0		0	319.083	0	0		0	225.324	0	0		0	181.469	0	0
	0	253.216	0	0		2.48967	201.663	1.23457	38.7266		0	319.932	0	0		5.02052	225.923	2.22222	45.0366		0	181.952	0	0
	0	253.888	0	0		0	202.198	0	0		0	320.781	0	0		0	226.523	0	0		0	182.434	0	0
	0	254.56	0	0		0	202.733	0	0		0	321.629	0	0		0	227.122	0	0		0	182.917	0	0
	0	255.231	0	0		2.50948	203.268	1.23457	40.9777		0	322.478	0	0		0	227.721	0	0		0	183.4	0	0
	0	255.903	0	0		0	203.803	0	0		0	323.326	0	0		2.53689	228.321	1.11111	24.9801		0	183.882	0	0
	3.16759	256.575	1.23457	83.5686		0	204.338	0	0		0	324.175	0	0		0	228.92	0	0		0	184.365	0	0
	0	257.246	0	0		0	204.873	0	0		0	325.024	0	0		0	229.519	0	0		7.3939	184.848	4	60.6488
	0	257.918	0	0		0	205.408	0	0		0	325.872	0	0		2.55687	230.118	1.11111	26.9103		0	185.33	0	0
	0	258.589	0	0		0	205.943	0	0		0	326.721	0	0		0	230.718	0	0		0	185.813	0	0
	3.20076	259.261	1.23457	89.1157		0	206.477	0	0		0	327.57	0	0		0	231.317	0	0		0	186.296	0	0
	0	259.933	0	0		0	207.012	0	0		0	328.418	0	0		0	231.916	0	0		0	186.778	0	0
	0	260.604	0	0		0	207.547	0	0		0	329.267	0	0		0	232.515	0	0		7.49043	187.261	4	68.3988
	3.22563	261.276	1.23457	93.3929		0	208.082	0	0		0	330.115	0	0		0	233.115	0	0		0	187.743	0	0
	0	261.948	0	0		0	208.617	0	0		0	330.964	0	0		0	233.714	0	0		0	188.226	0	0
	0	262.62	0	0		0	209.152	0	0		0	331.813	0	0		0	234.313	0	0		0	188.709	0	0
	0	263.291	0	0		2.58873	209.687	1.23457	50.6176		0	332.661	0	0		0	234.912	0	0		15.1353	189.191	8	149.868
	0	263.963	0	0		0	210.222	0	0		0	333.51	0	0		0	235.512	0	0		0	189.674	0	0
	0	264.635	0	0		0	210.757	0	0		0	334.358	0	0		7.87037	236.111	3.33333	101.589		0	190.156	0	0
	0	265.306	0	0		0	211.292	0	0		0	335.207	0	0		0	236.71	0	0		0	190.639	0	0
	0	265.978	0	0		0	211.827	0	0		0	336.056	0	0		0	237.31	0	0		0	191.122	0	0
	0	266.649	0	0		0	212.362	0	0		0	336.904	0	0		0	237.909	0	0		0	191.604	0	0
	0	267.321	0	0		0	212.897	0	0		0	337.753	0	0		2.65009	238.508	1.11111	36.8676		0	192.087	0	0
	0	267.993	0	0		0	213.431	0	0		0	338.602	0	0		0	239.107	0	0		0	192.57	0	0
	0	268.664	0	0		2.64156	213.966	1.23457	57.6093		0	339.45	0	0		0	239.707	0	0		7.72209	193.052	4	88.8999
	3.32514	269.336	1.23457	111.504		0	214.501	0	0		0	340.299	0	0		2.67007	240.306	1.11111	39.2049		0	193.535	0	0
	0	270.008	0	0		0	215.036	0	0		0	341.147	0	0		0	240.905	0	0		0	194.018	0	0
	0	270.679	0	0		0	215.571	0	0		0	341.996	0	0		0	241.504	0	0		0	194.5	0	0
	0	271.351	0	0		0	216.106	0	0		0	342.845	0	0		0	242.104	0	0		0	194.983	0	0
	0	272.023	0	0		0	216.641	0	0		0	343.693	0	0		2.6967	242.703	1.11111	42.4328		0	195.465	0	0
	0	272.694	0	0		0	217.176	0	0		0	344.542	0	0		0	243.302	0	0		0	195.948	0	0
	0	273.366	0	0		0	217.711	0	0		0	345.391	0	0		0	243.901	0	0		0	196.431	0	0
	0	274.038	0	0		0	218.246	0	0		0	346.239	0	0		2.71667	244.501	1.11111	44.9376		0	196.913	0	0
	0	274.709	0	0		0	218.78	0	0		0	347.088	0	0		0	245.1	0	0		0	197.396	0	0
	0	275.381	0	0		0	219.315	0	0		0	347.937	0	0		0	245.699	0	0		0	197.879	0	0
	0	276.053	0	0		2.7142	219.85	1.23457	67.9614		0	348.785	0	0		0	246.298	0	0		0	198.361	0	0
	0	276.724	0	0		0	220.385	0	0		0	349.634	0	0		0	246.898	0	0		0	198.844	0	0
	0	277.396	0	0		0	220.92	0	0		0	350.482	0	0		0	247.497	0	0		0	199.327	0	0
	0	278.068	0	0		0	221.455	0	0		0	351.331	0	0		0	248.096	0	0		0	199.809	0	0
	0	278.739	0	0		0	221.99	0	0		0	352.18	0	0		2.76328	248.696	1.11111	51.0615		0	200.292	0	0
	0	279.411	0	0		0	222.525	0	0		0	353.028	0	0		0	249.295	0	0		0	200.774	0	0
	0	280.083	0	0		0	223.06	0	0		0	353.877	0	0		0	249.894	0	0		0	201.257	0	0
	0	280.754	0	0		0	223.595	0	0		0	354.726	0	0		0	250.493	0	0		0	201.74	0	0
	0	281.426	0	0		0	224.13	0	0		0	355.574	0	0		0	251.093	0	0		0	202.222	0	0
	0	282.098	0	0		0	224.665	0	0		0	356.423	0	0		0	251.692	0	0		0	202.705	0	0
	0	282.769	0	0		0	225.2	0	0		0	357.271	0	0		0	252.291	0	0		0	203.188	0	0
	3.49927	283.441	1.23457	147.058		0	225.734	0	0		0	358.12	0	0		0	252.891	0	0		0	203.67	0	0
	0	284.113	0	0		0	226.269	0	0		0	358.969	0	0		0	253.49	0	0		0	204.153	0	0
	0	284.784	0	0		0	226.804	0	0		0	359.817	0	0		0	254.089	0	0		0	204.635	0	0
	0	285.456	0	0		0	227.339	0	0		0	360.666	0	0		0	254.688	0	0		0	205.118	0	0
	0	286.128	0	0		0	227.874	0	0		0	361.515	0	0		0	255.287	0	0		0	205.601	0	0
	0	286.799	0	0		0	228.409	0	0		0	362.363	0	0		0	255.887	0	0		0	206.083	0	0
	0	287.471	0	0		0	228.944	0	0		0	363.212	0	0		0	256.486	0	0		0	206.566	0	0
	0	288.143	0	0		0	229.479	0	0		0	364.06	0	0		2.8565	257.085	1.11111	64.4823		0	207.049	0	0
	0	288.814	0	0		2.83968	230.014	1.23457	87.8557		0	364.909	0	0		0	257.685	0	0		0	207.531	0	0
	7.1478	289.486	2.46914	327.599		0	230.549	0	0		0	365.758	0	0		0	258.284	0	0		0	208.014	0	0
	0	290.158	0	0		0	231.084	0	0		0	366.606	0	0		0	258.883	0	0		0	208.496	0	0
	0	290.829	0	0		0	231.619	0	0		0	367.455	0	0		0	259.482	0	0		0	208.979	0	0
	0	291.501	0	0		2.86609	232.153	1.23457	92.3688		4.09226	368.304	1.11111	499.449		0	260.082	0	0		0	209.462	0	0
	0	292.173	0	0		0	232.688	0	0		0	369.152	0	0		0	260.681	0	0		0	209.944	0	0
	0	292.844	0	0		0	233.223	0	0		0	370.001	0	0		0	261.28	0	0		0	210.427	0	0
	0	293.516	0	0		0	233.758	0	0		0	370.849	0	0		0	261.88	0	0		0	210.91	0	0
	0	294.188	0	0		0	234.293	0	0		0	371.698	0	0		0	262.479	0	0		0	211.392	0	0
	0	294.859	0	0		0	234.828	0	0		0	372.547	0	0		0	263.078	0	0		0	211.875	0	0
	0	295.531	0	0		0	235.363	0	0		0	373.395	0	0		0	263.677	0	0		0	212.357	0	0
	3.65682	296.202	1.23457	183.459		0	235.898	0	0		0	374.244	0	0		0	264.276	0	0		0	212.84	0	0
	0	296.874	0	0		0	236.433	0	0		0	375.092	0	0		0	264.876	0	0		0	213.323	0	0
	0	297.546	0	0		0	236.968	0	0		0	375.941	0	0		0	265.475	0	0		0	213.805	0	0
	0	298.217	0	0		0	237.503	0	0		0	376.79	0	0		0	266.074	0	0		0	214.288	0	0
	0	298.889	0	0		0	238.037	0	0		0	377.638	0	0		0	266.674	0	0		0	214.771	0	0
	0	299.561	0	0		0	238.572	0	0		0	378.487	0	0		0	267.273	0	0		0	215.253	0	0
	0	300.233	0	0		0	239.107	0	0		0	379.336	0	0		0	267.872	0	0		0	215.736	0	0
	0	300.904	0	0		0	239.642	0	0		0	380.184	0	0		0	268.471	0	0		0	216.219	0	0
	0	301.576	0	0		0	240.177	0	0		0	381.033	0	0		0	269.071	0	0		0	216.701	0	0
	0	302.248	0	0		0	240.712	0	0		0	381.882	0	0		0	269.67	0	0		0	217.184	0	0
	0	302.919	0	0		0	241.247	0	0		0	382.73	0	0		0	270.269	0	0		0	217.667	0	0
	0	303.591	0	0		0	241.782	0	0		0	383.579	0	0		0	270.868	0	0		0	218.149	0	0
	0	304.262	0	0		0	242.317	0	0		0	384.427	0	0		0	271.468	0	0		0	218.632	0	0
	0	304.934	0	0		0	242.852	0	0		0	385.276	0	0		0	272.067	0	0		0	219.114	0	0
	0	305.606	0	0		0	243.387	0	0		0	386.125	0	0		0	272.666	0	0		0	219.597	0	0
	0	306.277	0	0		0	243.922	0	0		0	386.973	0	0		0	273.265	0	0		0	220.08	0	0
	0	306.949	0	0		3.01798	244.457	1.23457	120.514		0	387.822	0	0		0	273.865	0	0		0	220.562	0	0
	0	307.621	0	0		0	244.991	0	0		0	388.671	0	0		0	274.464	0	0		0	221.045	0	0
	0	308.292	0	0		0	245.526	0	0		0	389.519	0	0		0	275.063	0	0		0	221.528	0	0
	0	308.964	0	0		0	246.061	0	0		0	390.368	0	0		0	275.663	0	0		0	222.01	0	0
	0	309.636	0	0		0	246.596	0	0		0	391.216	0	0		0	276.262	0	0		0	222.493	0	0
	0	310.307	0	0		0	247.131	0	0		0	392.065	0	0		0	276.861	0	0		0	222.975	0	0
	0	310.979	0	0		0	247.666	0	0		0	392.914	0	0		0	277.46	0	0		0	223.458	0	0
	0	311.651	0	0		0	248.201	0	0		0	393.762	0	0		0	278.06	0	0		0	223.941	0	0
	0	312.322	0	0		0	248.736	0	0		0	394.611	0	0		0	278.659	0	0		0	224.423	0	0
	0	312.994	0	0		0	249.271	0	0		0	395.46	0	0		3.10287	279.258	1.11111	107.481		0	224.906	0	0
	0	313.666	0	0		0	249.806	0	0		4.40342	396.308	1.11111	640.105		0	279.857	0	0		0	225.388	0	0
	0	314.337	0	0		0	250.34	0	0		0	397.157	0	0		0	280.457	0	0		9.03485	225.871	4	255.759
	0	315.009	0	0		0	250.875	0	0		0	398.005	0	0		0	281.056	0	0		0	226.354	0	0
	0	315.681	0	0		0	251.41	0	0		0	398.854	0	0		6.25901	281.655	2.22222	225.568		0	226.836	0	0
	0	316.352	0	0		0	251.945	0	0		0	399.703	0	0		0	282.255	0	0		0	227.319	0	0
	0	317.024	0	0		0	252.48	0	0		0	400.551	0	0		0	282.854	0	0		0	227.802	0	0
	0	317.696	0	0		3.12364	253.015	1.23457	142.297		0	401.4	0	0		0	283.453	0	0		0	228.284	0	0
	0	318.367	0	0		0	253.55	0	0		0	402.249	0	0		0	284.052	0	0		0	228.767	0	0
	0	319.039	0	0		0	254.085	0	0		0	403.097	0	0		0	284.652	0	0		0	229.25	0	0
	0	319.711	0	0		0	254.62	0	0		0	403.946	0	0		0	285.251	0	0		0	229.732	0	0
	0	320.382	0	0		0	255.155	0	0		0	404.794	0	0		0	285.85	0	0		0	230.215	0	0
	0	321.054	0	0		0	255.69	0	0		0	405.643	0	0		0	286.449	0	0		0	230.697	0	0
	0	321.726	0	0		0	256.225	0	0		0	406.492	0	0		0	287.049	0	0		0	231.18	0	0
	3.98021	322.397	1.23457	270.775		0	256.76	0	0		0	407.34	0	0		0	287.648	0	0		0	231.663	0	0
	0	323.069	0	0		0	257.295	0	0		0	408.189	0	0		0	288.247	0	0		0	232.145	0	0
	0	323.741	0	0		0	257.829	0	0		0	409.038	0	0		0	288.846	0	0		0	232.628	0	0
	0	324.412	0	0		0	258.364	0	0		0	409.886	0	0		0	289.446	0	0		0	233.111	0	0
	0	325.084	0	0		0	258.899	0	0		0	410.735	0	0		0	290.045	0	0		0	233.593	0	0
	0	325.756	0	0		0	259.434	0	0		0	411.584	0	0		0	290.644	0	0		0	234.076	0	0
	0	326.427	0	0		0	259.969	0	0		0	412.432	0	0		0	291.243	0	0		0	234.559	0	0
	4.03826	327.099	1.23457	288.24		0	260.504	0	0		0	413.281	0	0		0	291.843	0	0		0	235.041	0	0
	0	327.771	0	0		0	261.039	0	0		0	414.129	0	0		0	292.442	0	0		0	235.524	0	0
	0	328.442	0	0		0	261.574	0	0		0	414.978	0	0		0	293.041	0	0		0	236.006	0	0
	0	329.114	0	0		0	262.109	0	0		0	415.827	0	0		0	293.641	0	0		0	236.489	0	0
	0	329.786	0	0		0	262.644	0	0		0	416.675	0	0		0	294.24	0	0		0	236.972	0	0
	0	330.457	0	0		0	263.178	0	0		0	417.524	0	0		0	294.839	0	0		0	237.454	0	0
	0	331.129	0	0		0	263.713	0	0		0	418.373	0	0		0	295.438	0	0		0	237.937	0	0
	0	331.801	0	0		0	264.248	0	0		0	419.221	0	0		3.28931	296.038	1.11111	147.283		0	238.42	0	0
	0	332.472	0	0		0	264.783	0	0		0	420.07	0	0		0	296.637	0	0		0	238.902	0	0
	0	333.144	0	0		0	265.318	0	0		0	420.918	0	0		0	297.236	0	0		0	239.385	0	0
	0	333.816	0	0		0	265.853	0	0		0	421.767	0	0		0	297.835	0	0		0	239.868	0	0
	0	334.487	0	0		0	266.388	0	0		0	422.616	0	0		0	298.435	0	0		0	240.35	0	0
	0	335.159	0	0		3.29534	266.923	1.23457	181.553		0	423.464	0	0		0	299.034	0	0		0	240.833	0	0
	0	335.83	0	0		0	267.458	0	0		0	424.313	0	0		0	299.633	0	0		0	241.315	0	0
	0	336.502	0	0		0	267.993	0	0		0	425.161	0	0		3.33592	300.233	1.11111	158.211		0	241.798	0	0
	0	337.174	0	0		0	268.528	0	0		0	426.01	0	0		0	300.832	0	0		0	242.281	0	0
	0	337.846	0	0		3.32176	269.063	1.23457	188.016		0	426.859	0	0		0	301.431	0	0		0	242.763	0	0
	0	338.517	0	0		0	269.598	0	0		0	427.707	0	0		0	302.03	0	0		0	243.246	0	0
	0	339.189	0	0		0	270.132	0	0		0	428.556	0	0		0	302.63	0	0		0	243.728	0	0
	0	339.861	0	0		0	270.667	0	0		0	429.405	0	0		0	303.229	0	0		0	244.211	0	0
	0	340.532	0	0		0	271.202	0	0		0	430.253	0	0		0	303.828	0	0		0	244.694	0	0
	0	341.204	0	0		0	271.737	0	0		0	431.102	0	0		0	304.427	0	0		0	245.176	0	0
	0	341.875	0	0		0	272.272	0	0		0	431.95	0	0		0	305.027	0	0		0	245.659	0	0
	0	342.547	0	0		0	272.807	0	0		0	432.799	0	0		0	305.626	0	0		0	246.142	0	0
	4.23727	343.219	1.23457	352.265		3.37459	273.342	1.23457	201.281		4.81831	433.648	1.11111	854.757		3.4025	306.225	1.11111	174.501		9.86497	246.624	4	405.744
	0			0		0			0		0			0		0			0		0			0
	0			0		0			0		0			0		0			0		0			0
	0			0		0			0		0			0		0			0		0			0
	0			0		0			0		0			0		0			0		0			0
	0			0		0			0		0			0		0			0		0			0
	0			0		0			0		0			0		0			0		0			0
	0			0		0			0		0			0		0			0		0			0
	0			0		0			0		0			0		0			0		0			0
	0			0		0			0		0			0		0			0		0			0
	0			0		0			0		0			0		0			0		0			0
	0			0		0			0		0			0		0			0		0			0
	0			0		0			0		0			0		0			0		0			0
	0			0		0			0		0			0		0			0		0			0
	0			0		0			0		0			0		0			0		0			0
	0			0		0			0		0			0		0			0		0			0
	0			0		0			0		0			0		0			0		0			0
	0			0		0			0		0			0		0			0		0			0
	0			0		0			0		0			0		0			0		0			0
	0			0		0			0		0			0		0			0		0			0
	0			0		0			0		0			0		0			0		0			0
	0			0		0			0		0			0		0			0		0			0
	0			0		0			0		0			0		0			0		0			0
	0			0		0			0		0			0		0			0		0			0
	0			0		0			0		0			0		0			0		0			0
	0			0		0			0		0			0		0			0		0			0
	0			0		0			0		0			0		0			0		0			0
	0			0		0			0		0			0		0			0		0			0
	0			0		0			0		0			0		0			0		0			0
	0			0		0			0		0			0		0			0		0			0
	0			0		0			0		0			0		0			0		0			0
	0			0		0			0		0			0		0			0		0			0
	0			0		0			0		0			0		0			0		0			0
	0			0		0			0		0			0		0			0		0			0
	0			0		0			0		0			0		0			0		0			0
	0			0		0			0		0			0		0			0		0			0
	0			0		0			0		0			0		0			0		0			0
	0			0		0			0		0			0		0			0		0			0
	0			0		0			0		0			0		0			0		0			0
	0			0		0			0		0			0		0			0		0			0
	0			0		0			0		0			0		0			0		0			0
	0			0		0			0		0			0		0			0		0			0
	0			0		0			0		0			0		0			0		0			0
	0			0		0			0		0			0		0			0		0			0
	0			0		0			0		0			0		0			0		0			0
	0			0		0			0		0			0		0			0		0			0
	0			0		0			0		0			0		0			0		0			0
	0			0		0			0		0			0		0			0		0			0
	0			0		0			0		0			0		0			0		0			0
	0			0		0			0		0			0		0			0		0			0
	0			0		0			0		0			0		0			0		0			0
	0			0		0			0		0			0		0			0		0			0
	0			0		0			0		0			0		0			0		0			0
	0			0		0			0		0			0		0			0		0			0
	0			0		0			0		0			0		0			0		0			0
	0			0		0			0		0			0		0			0		0			0
	0			0		0			0		0			0		0			0		0			0
	0			0		0			0		0			0		0			0		0			0
	0			0		0			0		0			0		0			0		0			0
	0			0		0			0		0			0		0			0		0			0
	0			0		0			0		0			0		0			0		0			0
	0			0		0			0		0			0		0			0		0			0
	0			0		0			0		0			0		0			0		0			0
	0			0		0			0		0			0		0			0		0			0
	0			0		0			0		0			0		0			0		0			0
	0			0		0			0		0			0		0			0		0			0
	0			0		0			0		0			0		0			0		0			0
	0			0		0			0		0			0		0			0		0			0
	0			0		0			0		0			0		0			0		0			0
	0			0		0			0		0			0		0			0		0			0
	0			0		0			0		0			0		0			0		0			0
	0			0		0			0		0			0		0			0		0			0
	0			0		0			0		0			0		0			0		0			0
	0			0		0			0		0			0		0			0		0			0
	0			0		0			0		0			0		0			0		0			0
	0			0		0			0		0			0		0			0		0			0
	0			0		0			0		0			0		0			0		0			0
	0			0		0			0		0			0		0			0		0			0
	0			0		0			0		0			0		0			0		0			0
	0			0		0			0		0			0		0			0		0			0
	0			0		0			0		0			0		0			0		0			0
	0			0		0			0		0			0		0			0		0			0
	0			0		0			0		0			0		0			0		0			0
	0			0		0			0		0			0		0			0		0			0
	0			0		0			0		0			0		0			0		0			0
	0			0		0			0		0			0		0			0		0			0
	0			0		0			0		0			0		0			0		0			0
	0			0		0			0		0			0		0			0		0			0
	0			0		0			0		0			0		0			0		0			0
	0			0		0			0		0			0		0			0		0			0
	0			0		0			0		0			0		0			0		0			0
	0			0		0			0		0			0		0			0		0			0
	0			0		0			0		0			0		0			0		0			0
	0			0		0			0		0			0		0			0		0			0
	0			0		0			0		0			0		0			0		0			0
	0			0		0			0		0			0		0			0		0			0
	0			0		0			0		0			0		0			0		0			0
	0			0		0			0		0			0		0			0		0			0
	0			0		0			0		0			0		0			0		0			0
	0			0		0			0		0			0		0			0		0			0
	0			0		0			0		0			0		0			0		0			0
	0			0		0			0		0			0		0			0		0			0
	0			0		0			0		0			0		0			0		0			0
	0			0		0			0		0			0		0			0		0			0
	0			0		0			0		0			0		0			0		0			0
	0			0		0			0		0			0		0			0		0			0
	0			0		0			0		0			0		0			0		0			0
	0			0		0			0		0			0		0			0		0			0
	0			0		0			0		0			0		0			0		0			0
	0			0		0			0		0			0		0			0		0			0
	0			0		0			0		0			0		0			0		0			0
	0			0		0			0		0			0		0			0		0			0
	0			0		0			0		0			0		0			0		0			0
	0			0		0			0		0			0		0			0		0			0
	0			0		0			0		0			0		0			0		0			0
	0			0		0			0		0			0		0			0		0			0
	0			0		0			0		0			0		0			0		0			0
	0			0		0			0		0			0		0			0		0			0
	0			0		0			0		0			0		0			0		0			0
	0			0		0			0		0			0		0			0		0			0
	0			0		0			0		0			0		0			0		0			0
	0			0		0			0		0			0		0			0		0			0
	0			0		0			0		0			0		0			0		0			0
	0			0		0			0		0			0		0			0		0			0
	0			0		0			0		0			0		0			0		0			0
	0			0		0			0		0			0		0			0		0			0
	0			0		0			0		0			0		0			0		0			0
	0			0		0			0		0			0		0			0		0			0
	0			0		0			0		0			0		0			0		0			0
	0			0		0			0		0			0		0			0		0			0
	0			0		0			0		0			0		0			0		0			0
	0			0		0			0		0			0		0			0		0			0
	0			0		0			0		0			0		0			0		0			0
	0			0		0			0		0			0		0			0		0			0
	0			0		0			0		0			0		0			0		0			0
	0			0		0			0		0			0		0			0		0			0
	0			0		0			0		0			0		0			0		0			0
	0			0		0			0		0			0		0			0		0			0
	0			0		0			0		0			0		0			0		0			0
	0			0		0			0		0			0		0			0		0			0
	0			0		0			0		0			0		0			0		0			0
	0			0		0			0		0			0		0			0		0			0
	0			0		0			0		0			0		0			0		0			0
	0			0		0			0		0			0		0			0		0			0
	0			0		0			0		0			0		0			0		0			0
	0			0		0			0		0			0		0			0		0			0
	0			0		0			0		0			0		0			0		0			0
	0			0		0			0		0			0		0			0		0			0
	0			0		0			0		0			0		0			0		0			0
	0			0		0			0		0			0		0			0		0			0
	0			0		0			0		0			0		0			0		0			0
	0			0		0			0		0			0		0			0		0			0
	0			0		0			0		0			0		0			0		0			0
	0			0		0			0		0			0		0			0		0			0
	0			0		0			0		0			0		0			0		0			0
	0			0		0			0		0			0		0			0		0			0
	0			0		0			0		0			0		0			0		0			0
	0			0		0			0		0			0		0			0		0			0
	0			0		0			0		0			0		0			0		0			0
	0			0		0			0		0			0		0			0		0			0
	0			0		0			0		0			0		0			0		0			0
	0			0		0			0		0			0		0			0		0			0
	0			0		0			0		0			0		0			0		0			0
	0			0		0			0		0			0		0			0		0			0
	0			0		0			0		0			0		0			0		0			0
	0			0		0			0		0			0		0			0		0			0
	0			0		0			0		0			0		0			0		0			0
	0			0		0			0		0			0		0			0		0			0
	0			0		0			0		0			0		0			0		0			0
	0			0		0			0		0			0		0			0		0			0
	0			0		0			0		0			0		0			0		0			0
	0			0		0			0		0			0		0			0		0			0
	0			0		0			0		0			0		0			0		0			0
	0			0		0			0		0			0		0			0		0			0
	0			0		0			0		0			0		0			0		0			0
	0			0		0			0		0			0		0			0		0			0
	0			0		0			0		0			0		0			0		0			0
	0			0		0			0		0			0		0			0		0			0
	0			0		0			0		0			0		0			0		0			0
	0			0		0			0		0			0		0			0		0			0
	0			0		0			0		0			0		0			0		0			0
	0			0		0			0		0			0		0			0		0			0
	0			0		0			0		0			0		0			0		0			0
	0			0		0			0		0			0		0			0		0			0
	0			0		0			0		0			0		0			0		0			0
	0			0		0			0		0			0		0			0		0			0
	0			0		0			0		0			0		0			0		0			0
	0			0		0			0		0			0		0			0		0			0
	0			0		0			0		0			0		0			0		0			0
	0			0		0			0		0			0		0			0		0			0
	0			0		0			0		0			0		0			0		0			0
	0			0		0			0		0			0		0			0		0			0
	0			0		0			0		0			0		0			0		0			0
	0			0		0			0		0			0		0			0		0			0
	0			0		0			0		0			0		0			0		0			0
	0			0		0			0		0			0		0			0		0			0
	0			0		0			0		0			0		0			0		0			0
	0			0		0			0		0			0		0			0		0			0
	0			0		0			0		0			0		0			0		0			0
	0			0		0			0		0			0		0			0		0			0
	0			0		0			0		0			0		0			0		0			0
	0			0		0			0		0			0		0			0		0			0
	0			0		0			0		0			0		0			0		0			0
	0			0		0			0		0			0		0			0		0			0
	0			0		0			0		0			0		0			0		0			0
	0			0		0			0		0			0		0			0		0			0
	0			0		0			0		0			0		0			0		0			0
	0			0		0			0		0			0		0			0		0			0
	0			0		0			0		0			0		0			0		0			0
	0			0		0			0		0			0		0			0		0			0
	0			0		0			0		0			0		0			0		0			0
	0			0		0			0		0			0		0			0		0			0
	0			0		0			0		0			0		0			0		0			0
	0			0		0			0		0			0		0			0		0			0
	0			0		0			0		0			0		0			0		0			0
	0			0		0			0		0			0		0			0		0			0
	0			0		0			0		0			0		0			0		0			0
	0			0		0			0		0			0		0			0		0			0
	0			0		0			0		0			0		0			0		0			0
	0			0		0			0		0			0		0			0		0			0
	0			0		0			0		0			0		0			0		0			0
	0			0		0			0		0			0		0			0		0			0
	0			0		0			0		0			0		0			0		0			0
	0			0		0			0		0			0		0			0		0			0
	0			0		0			0		0			0		0			0		0			0
	0			0		0			0		0			0		0			0		0			0
	0			0		0			0		0			0		0			0		0			0
	0			0		0			0		0			0		0			0		0			0
	0			0		0			0		0			0		0			0		0			0
	0			0		0			0		0			0		0			0		0			0
	0			0		0			0		0			0		0			0		0			0
	0			0		0			0		0			0		0			0		0			0
	0			0		0			0		0			0		0			0		0			0
	0			0		0			0		0			0		0			0		0			0
	0			0		0			0		0			0		0			0		0			0
	0			0		0			0		0			0		0			0		0			0
	0			0		0			0		0			0		0			0		0			0
	0			0		0			0		0			0		0			0		0			0
	0			0		0			0		0			0		0			0		0			0
	0			0		0			0		0			0		0			0		0			0
	0			0		0			0		0			0		0			0		0			0
	0			0		0			0		0			0		0			0		0			0
	0			0		0			0		0			0		0			0		0			0
	0			0		0			0		0			0		0			0		0			0
	0			0		0			0		0			0		0			0		0			0
	0			0		0			0		0			0		0			0		0			0
	0			0		0			0		0			0		0			0		0			0
	0			0		0			0		0			0		0			0		0			0
	0			0		0			0		0			0		0			0		0			0
	0			0		0			0		0			0		0			0		0			0
	0			0		0			0		0			0		0			0		0			0
	0			0		0			0		0			0		0			0		0			0
	0			0		0			0		0			0		0			0		0			0
	0			0		0			0		0			0		0			0		0			0
	0			0		0			0		0			0		0			0		0			0
	0			0		0			0		0			0		0			0		0			0
	0			0		0			0		0			0		0			0		0			0
	0			0		0			0		0			0		0			0		0			0
	0			0		0			0		0			0		0			0		0			0
	0			0		0			0		0			0		0			0		0			0
	0			0		0			0		0			0		0			0		0			0
	0			0		0			0		0			0		0			0		0			0
	0			0		0			0		0			0		0			0		0			0
	0			0		0			0		0			0		0			0		0			0
	0			0		0			0		0			0		0			0		0			0
	0			0		0			0		0			0		0			0		0			0
	0			0		0			0		0			0		0			0		0			0
	0			0		0			0		0			0		0			0		0			0
	0			0		0			0		0			0		0			0		0			0
	0			0		0			0		0			0		0			0		0			0
	0			0		0			0		0			0		0			0		0			0
	0			0		0			0		0			0		0			0		0			0
	0			0		0			0		0			0		0			0		0			0
	0			0		0			0		0			0		0			0		0			0
	0			0		0			0		0			0		0			0		0			0
	0			0		0			0		0			0		0			0		0			0
	0			0		0			0		0			0		0			0		0			0
	0			0		0			0		0			0		0			0		0			0
	0			0		0			0		0			0		0			0		0			0
	0			0		0			0		0			0		0			0		0			0
	0			0		0			0		0			0		0			0		0			0
	0			0		0			0		0			0		0			0		0			0
	0			0		0			0		0			0		0			0		0			0
	0			0		0			0		0			0		0			0		0			0
	0			0		0			0		0			0		0			0		0			0
	0			0		0			0		0			0		0			0		0			0
	0			0		0			0		0			0		0			0		0			0
	0			0		0			0		0			0		0			0		0			0
	0			0		0			0		0			0		0			0		0			0
	0			0		0			0		0			0		0			0		0			0
	0			0		0			0		0			0		0			0		0			0
	0			0		0			0		0			0		0			0		0			0
	0			0		0			0		0			0		0			0		0			0
	0			0		0			0		0			0		0			0		0			0
	0			0		0			0		0			0		0			0		0			0
	0			0		0			0		0			0		0			0		0			0
	0			0		0			0		0			0		0			0		0			0
	0			0		0			0		0			0		0			0		0			0
	0			0		0			0		0			0		0			0		0			0
	0			0		0			0		0			0		0			0		0			0
	0			0		0			0		0			0		0			0		0			0
	0			0		0			0		0			0		0			0		0			0
	0			0		0			0		0			0		0			0		0			0
	0			0		0			0		0			0		0			0		0			0
	0			0		0			0		0			0		0			0		0			0
	0			0		0			0		0			0		0			0		0			0
	0			0		0			0		0			0		0			0		0			0
	0			0		0			0		0			0		0			0		0			0
	0			0		0			0		0			0		0			0		0			0
	0			0		0			0		0			0		0			0		0			0
	0			0		0			0		0			0		0			0		0			0
	0			0		0			0		0			0		0			0		0			0
	0			0		0			0		0			0		0			0		0			0
	0			0		0			0		0			0		0			0		0			0
	0			0		0			0		0			0		0			0		0			0
	0			0		0			0		0			0		0			0		0			0
	0			0		0			0		0			0		0			0		0			0
	0			0		0			0		0			0		0			0		0			0
	0			0		0			0		0			0		0			0		0			0
	0			0		0			0		0			0		0			0		0			0
	0			0		0			0		0			0		0			0		0			0
	0			0		0			0		0			0		0			0		0			0
	0			0		0			0		0			0		0			0		0			0
	0			0		0			0		0			0		0			0		0			0
	0			0		0			0		0			0		0			0		0			0
	0			0		0			0		0			0		0			0		0			0
	0			0		0			0		0			0		0			0		0			0
	0			0		0			0		0			0		0			0		0			0
	0			0		0			0		0			0		0			0		0			0
	0			0		0			0		0			0		0			0		0			0
	0			0		0			0		0			0		0			0		0			0
	0			0		0			0		0			0		0			0		0			0
	0			0		0			0		0			0		0			0		0			0
	0			0		0			0		0			0		0			0		0			0
	0			0		0			0		0			0		0			0		0			0
	0			0		0			0		0			0		0			0		0			0
	0			0		0			0		0			0		0			0		0			0
	0			0		0			0		0			0		0			0		0			0
	0			0		0			0		0			0		0			0		0			0
	0			0		0			0		0			0		0			0		0			0
	0			0		0			0		0			0		0			0		0			0
	0			0		0			0		0			0		0			0		0			0
	0			0		0			0		0			0		0			0		0			0
	0			0		0			0		0			0		0			0		0			0
	0			0		0			0		0			0		0			0		0			0
	0			0		0			0		0			0		0			0		0			0
	0			0		0			0		0			0		0			0		0			0
	0			0		0			0		0			0		0			0		0			0
	0			0		0			0		0			0		0			0		0			0
	0			0		0			0		0			0		0			0		0			0
	0			0		0			0		0			0		0			0		0			0
	0			0		0			0		0			0		0			0		0			0
	0			0		0			0		0			0		0			0		0			0
	0			0		0			0		0			0		0			0		0			0
	0			0		0			0		0			0		0			0		0			0
	0			0		0			0		0			0		0			0		0			0
	0			0		0			0		0			0		0			0		0			0
	0			0		0			0		0			0		0			0		0			0
	0			0		0			0		0			0		0			0		0			0
	0			0		0			0		0			0		0			0		0			0
	0			0		0			0		0			0		0			0		0			0
	0			0		0			0		0			0		0			0		0			0
	0			0		0			0		0			0		0			0		0			0
	0			0		0			0		0			0		0			0		0			0
	0			0		0			0		0			0		0			0		0			0
	0			0		0			0		0			0		0			0		0			0
	0			0		0			0		0			0		0			0		0			0
	0			0		0			0		0			0		0			0		0			0
	0			0		0			0		0			0		0			0		0			0
	0			0		0			0		0			0		0			0		0			0
	0			0		0			0		0			0		0			0		0			0
	0			0		0			0		0			0		0			0		0			0
	0			0		0			0		0			0		0			0		0			0
	0			0		0			0		0			0		0			0		0			0
	0			0		0			0		0			0		0			0		0			0
	0			0		0			0		0			0		0			0		0			0
	0			0		0			0		0			0		0			0		0			0
	0			0		0			0		0			0		0			0		0			0
	0			0		0			0		0			0		0			0		0			0
	0			0		0			0		0			0		0			0		0			0
	0			0		0			0		0			0		0			0		0			0
	0			0		0			0		0			0		0			0		0			0
	0			0		0			0		0			0		0			0		0			0
	0			0		0			0		0			0		0			0		0			0
	0			0		0			0		0			0		0			0		0			0
	0			0		0			0		0			0		0			0		0			0
	0			0		0			0		0			0		0			0		0			0
	0			0		0			0		0			0		0			0		0			0
	0			0		0			0		0			0		0			0		0			0
	0			0		0			0		0			0		0			0		0			0
	0			0		0			0		0			0		0			0		0			0
	0			0		0			0		0			0		0			0		0			0
	0			0		0			0		0			0		0			0		0			0
	0			0		0			0		0			0		0			0		0			0
	0			0		0			0		0			0		0			0		0			0
	0			0		0			0		0			0		0			0		0			0
	0			0		0			0		0			0		0			0		0			0
	0			0		0			0		0			0		0			0		0			0
	0			0		0			0		0			0		0			0		0			0
	0			0		0			0		0			0		0			0		0			0
	0			0		0			0		0			0		0			0		0			0
	0			0		0			0		0			0		0			0		0			0
	0			0		0			0		0			0		0			0		0			0
	0			0		0			0		0			0		0			0		0			0
	0			0		0			0		0			0		0			0		0			0
	0			0		0			0		0			0		0			0		0			0
	0			0		0			0		0			0		0			0		0			0
	0			0		0			0		0			0		0			0		0			0
	0			0		0			0		0			0		0			0		0			0
	0			0		0			0		0			0		0			0		0			0
	0			0		0			0		0			0		0			0		0			0
	0			0		0			0		0			0		0			0		0			0
	0			0		0			0		0			0		0			0		0			0
	0			0		0			0		0			0		0			0		0			0
	0			0		0			0		0			0		0			0		0			0
	0			0		0			0		0			0		0			0		0			0
	0			0		0			0		0			0		0			0		0			0
	0			0		0			0		0			0		0			0		0			0
	0			0		0			0		0			0		0			0		0			0
	0			0		0			0		0			0		0			0		0			0
	0			0		0			0		0			0		0			0		0			0
	0			0		0			0		0			0		0			0		0			0
	0			0		0			0		0			0		0			0		0			0
	0			0		0			0		0			0		0			0		0			0
	0			0		0			0		0			0		0			0		0			0
	0			0		0			0		0			0		0			0		0			0
	0			0		0			0		0			0		0			0		0			0
	0			0		0			0		0			0		0			0		0			0
	0			0		0			0		0			0		0			0		0			0
	0			0		0			0		0			0		0			0		0			0
	0			0		0			0		0			0		0			0		0			0
	0			0		0			0		0			0		0			0		0			0
	0			0		0			0		0			0		0			0		0			0
	0			0		0			0		0			0		0			0		0			0
	0			0		0			0		0			0		0			0		0			0
	0			0		0			0		0			0		0			0		0			0
	0			0		0			0		0			0		0			0		0			0
	0			0		0			0		0			0		0			0		0			0
	0			0		0			0		0			0		0			0		0			0
	0			0		0			0		0			0		0			0		0			0
	0			0		0			0		0			0		0			0		0			0
	0			0		0			0		0			0		0			0		0			0
	0			0		0			0		0			0		0			0		0			0
	0			0		0			0		0			0		0			0		0			0
	0			0		0			0		0			0		0			0		0			0
	0			0		0			0		0			0		0			0		0			0
	0			0		0			0		0			0		0			0		0			0
	0			0		0			0		0			0		0			0		0			0
	0			0		0			0		0			0		0			0		0			0
	0			0		0			0		0			0		0			0		0			0
	0			0		0			0		0			0		0			0		0			0
	0			0		0			0		0			0		0			0		0			0
	0			0		0			0		0			0		0			0		0			0
	0			0		0			0		0			0		0			0		0			0
	0			0		0			0		0			0		0			0		0			0
	0			0		0			0		0			0		0			0		0			0
	0			0		0			0		0			0		0			0		0			0
	0			0		0			0		0			0		0			0		0			0
	0			0		0			0		0			0		0			0		0			0
	0			0		0			0		0			0		0			0		0			0
	0			0		0			0		0			0		0			0		0			0
	0			0		0			0		0			0		0			0		0			0
	0			0		0			0		0			0		0			0		0			0
	0			0		0			0		0			0		0			0		0			0
	0			0		0			0		0			0		0			0		0			0
	0			0		0			0		0			0		0			0		0			0
	0			0		0			0		0			0		0			0		0			0
	0			0		0			0		0			0		0			0		0			0
	0			0		0			0		0			0		0			0		0			0
	0			0		0			0		0			0		0			0		0			0
	0			0		0			0		0			0		0			0		0			0
	0			0		0			0		0			0		0			0		0			0
	0			0		0			0		0			0		0			0		0			0
	0			0		0			0		0			0		0			0		0			0
	0			0		0			0		0			0		0			0		0			0
	0			0		0			0		0			0		0			0		0			0
	0			0		0			0		0			0		0			0		0			0
	0			0		0			0		0			0		0			0		0			0
	0			0		0			0		0			0		0			0		0			0
	0			0		0			0		0			0		0			0		0			0
	0			0		0			0		0			0		0			0		0			0
	0			0		0			0		0			0		0			0		0			0
	0			0		0			0		0			0		0			0		0			0
	0			0		0			0		0			0		0			0		0			0
	0			0		0			0		0			0		0			0		0			0
	0			0		0			0		0			0		0			0		0			0
	0			0		0			0		0			0		0			0		0			0
	0			0		0			0		0			0		0			0		0			0
	0			0		0			0		0			0		0			0		0			0
	0			0		0			0		0			0		0			0		0			0
	0			0		0			0		0			0		0			0		0			0
	0			0		0			0		0			0		0			0		0			0
	0			0		0			0		0			0		0			0		0			0
	0			0		0			0		0			0		0			0		0			0
	0			0		0			0		0			0		0			0		0			0
	0			0		0			0		0			0		0			0		0			0
	0			0		0			0		0			0		0			0		0			0
	0			0		0			0		0			0		0			0		0			0
	0			0		0			0		0			0		0			0		0			0
	0			0		0			0		0			0		0			0		0			0
	0			0		0			0		0			0		0			0		0			0
	0			0		0			0		0			0		0			0		0			0
	0			0		0			0		0			0		0			0		0			0
	0			0		0			0		0			0		0			0		0			0
	0			0		0			0		0			0		0			0		0			0
	0			0		0			0		0			0		0			0		0			0
	0			0		0			0		0			0		0			0		0			0
	0			0		0			0		0			0		0			0		0			0
	0			0		0			0		0			0		0			0		0			0
	0			0		0			0		0			0		0			0		0			0
	0			0		0			0		0			0		0			0		0			0
	0			0		0			0		0			0		0			0		0			0
	0			0		0			0		0			0		0			0		0			0
