# Supplementary material for: T cell stiffness is enhanced upon formation of immunological synapse
Source: eLife. 2021 Jul 27;10:e66643. doi: 10.7554/eLife.66643 (PMC8360652; doi:10.7554/eLife.66643)
Supplement: Figure 2—figure supplement 2—source data 1. [file elife-66643-fig2-figsupp2-data1.xlsx]

## Sheet: Overview
substrate	Glass; uncoated; AFM experimental conditions glass		Glass; uncoated; AFM experimental conditions living cells	Glass; LFA-1 functionalized	Glass; αLFA-1 +αCD3+CD28-functionalized	PDMS (2.5 Mpa); uncoated	PDMS (2.5 MPa); αLFA-1 +αCD3+CD28-functionalized	PDMS (400 kPa); unfunctionalized	PDMS (400 kPa); αLFA-1 +αCD3+CD28-functionalized
Stiffness (Unit)	MPa		MPa	kPa	kPa	MPa	kPa	kPa	kPa
	975.923		13585.4	432.594	732.593	2.5209	353.526	401.288	433.379
	989.97		15193.9	461.986	430.541	2.28674	461.836	96.2845	130.182
	995.599		15212.8	613.198	396.147	2.6478	526.249	399.54	269.582
			17204.9	596.261	420.887	2.52065	337.728	518.119	398.067
			17974.7	286.265	599.111	2.39403	906.971	683.065	313.572
			20408	1570.23	458.213		282.388		413.163
			21468.9	576.999	611.089		353.618
			20797.4	278.533	485.376		2074.9
				945.747	850.652		1036.39
				826.52	897.718		477.108
				655.047	854.496
mean	987.164		17730.7	658.489	612.439	2.47402	681.071	419.659	326.324
SD	10.1335		2948.16	364.303	191.789	0.137878	550.254	214.703	114.893

## Sheet: raw data subst. glass LFA-1
		201-02-22 SUBSTRATE prim T cell LFA-1 cell 4-1					201-02-22 SUBSTRATE prim T cell LFA-1 cell 5-1					201-02-22 SUBSTRATE prim T cell LFA-1 cell 7-1					201-02-22 SUBSTRATE prim T cell LFA-1 cell 8-1					201-02-28 SUBSTRATE prim T cell LFA-1 cell 1-1					201-03-07 SUBSTRATE prim T cell LFA-1 cell 2-2					201-03-07 SUBSTRATE prim T cell LFA-1 cell 4-1					201-03-07 SUBSTRATE prim T cell LFA-1 cell 5-1					201-03-14 SUBSTRATE prim T cell LFA-1 cell 1-1					201-03-14 SUBSTRATE prim T cell LFA-1 cell 2-1
		Average	0.432594				Average	461.986				Average	0.613198				Average	0.596261				Average	286.265				Average	1.57023				Average	0.576999				Average	278.533				Average	0.945747				Average	0.82652
		StDev	0.182408				StDev	163.084				StDev	0.243511				StDev	0.134883				StDev	66.8821				StDev	0.812994				StDev	0.133336				StDev	71.2639				StDev	0.152735				StDev	0.271403
				setp					setp					setp					setp					setp					setp					setp					setp					setp					setp
		Mm					kPa	%				MPa	%				MPa	%				kPa	%				MPa	%				MPa	%				kPa	%				MPa	%				MPa	%
	0	0	0.112994	0.000211455		0	0	0.0520833	111.162		0	0	0.0339559	0.000127678		0	0	0.0530504	0.000188609		0	0	0.0701262	57.4668		0	0	0.08	0.00197251		0	0	0.0270563	9.00778e-05		0	0	0.0273373	21.2085		0	0	0.160256	0.00143339		0	0	0.087184	0.000595584
	0	0.00226152	0	0		0	1.92648	0	0		0	0.00304328	0	0		0	0.00201024	0	0		0	1.13076	0	0		0	0.00765952	0	0		0	0.00261095	0	0		0	1.46539	0	0		0	0.00325024	0	0		0	0.00394111	0	0
	0	0.00452303	0	0		0	3.85296	0	0		0	0.00608655	0	0		0	0.00402047	0	0		0	2.26152	0	0		0	0.0153191	0	0		0	0.0052219	0	0		0	2.93078	0	0		0	0.00650048	0	0		0	0.00788222	0	0
	0	0.00678455	0	0		0	5.77943	0	0		0	0.00912983	0	0		0	0.00603071	0	0		0	3.39228	0	0		0	0.0229786	0	0		0	0.00783285	0	0		0	4.39617	0	0		0	0.00975072	0	0		0	0.0118233	0	0
	0	0.00904607	0	0		0	7.70591	0	0		0	0.0121731	0	0		0	0.00804095	0	0		0	4.52303	0	0		0	0.0306381	0	0		0	0.0104438	0	0		0	5.86156	0	0		0	0.013001	0	0		0	0.0157644	0	0
	0	0.0113076	0	0		0	9.63239	0	0		0	0.0152164	0	0		0	0.0100512	0	0		0	5.65379	0	0		0	0.0382976	0	0		0	0.0130548	0	0		0	7.32695	0	0		0	0.0162512	0	0		0	0.0197056	0	0
	0	0.0135691	0	0		0	11.5589	0	0		0	0.0182596	0	0		0	0.0120614	0	0		0	6.78455	0	0		0	0.0459571	0	0		0	0.0156657	0	0		0	8.79234	0	0		0	0.0195014	0	0		0	0.0236467	0	0
	0	0.0158306	0	0		0	13.4853	0	0		0	0.0213029	0	0		0	0.0140717	0	0		0	7.91531	0	0		2.14467e-05	0.0536167	0.04	0.00092005		0	0.0182766	0	0		0	10.2577	0	0		0	0.0227517	0	0		0	0.0275878	0	0
	0	0.0180921	0	0		0	15.4118	0	0		0	0.0243462	0	0		0	0.0160819	0	0		0	9.04607	0	0		0	0.0612762	0	0		0	0.0208876	0	0		0.00320479	11.7231	0.0273373	19.4608		0	0.0260019	0	0		0	0.0315289	0	0
	0	0.0203537	0	0		0	17.3383	0	0		0	0.0273895	0	0		0	0.0180921	0	0		0	10.1768	0	0		0	0.0689357	0	0		0	0.0234985	0	0		0	13.1885	0	0		0	0.0292522	0	0		0	0.03547	0	0
	0	0.0226152	0	0		0	19.2648	0	0		0	0.0304328	0	0		0	0.0201024	0	0		0	11.3076	0	0		0	0.0765952	0	0		0	0.0261095	0	0		0	14.6539	0	0		0	0.0325024	0	0		0	0.0394111	0	0
	0	0.0248767	0	0		0	21.1913	0	0		0	0.033476	0	0		0	0.0221126	0	0		0	12.4383	0	0		0	0.0842548	0	0		0	0.0287205	0	0		0	16.1193	0	0		0	0.0357526	0	0		0	0.0433522	0	0
	0	0.0271382	0	0		0	23.1177	0	0		0	0.0365193	0	0		0	0.0241229	0	0		0	13.5691	0	0		3.67657e-05	0.0919143	0.04	0.00087417		0	0.0313314	0	0		0	17.5847	0	0		0	0.0390029	0	0		0	0.0472933	0	0
	0	0.0293997	0	0		0	25.0442	0	0		0	0.0395626	0	0		0	0.0261331	0	0		0	14.6999	0	0		0	0.0995738	0	0		0	0.0339424	0	0		0	19.0501	0	0		0	0.0422531	0	0		0	0.0512345	0	0
	0	0.0316612	0	0		0	26.9707	0	0		0	0.0426059	0	0		0	0.0281433	0	0		0	15.8306	0	0		4.28933e-05	0.107233	0.04	0.000856147		0	0.0365533	0	0		0.00560838	20.5155	0.0273373	18.1993		0	0.0455033	0	0		0	0.0551756	0	0
	0	0.0339228	0	0		0	28.8972	0	0		0	0.0456491	0	0		0	0.0301536	0	0		0	16.9614	0	0		0	0.114893	0	0		0	0.0391642	0	0		0	21.9809	0	0		0	0.0487536	0	0		0	0.0591167	0	0
	0	0.0361843	0	0		0	30.8236	0	0		0	0.0486924	0	0		0	0.0321638	0	0		0	18.0921	0	0		4.9021e-05	0.122552	0.04	0.000838312		0	0.0417752	0	0		0.0128192	23.4462	0.0546747	35.5764		0	0.0520038	0	0		0	0.0630578	0	0
	0	0.0384458	0	0		0	32.7501	0	0		0	0.0517357	0	0		0	0.034174	0	0		0	19.2229	0	0		0	0.130212	0	0		0	0.0443862	0	0		0	24.9116	0	0		0	0.0552541	0	0		0	0.0669989	0	0
	0	0.0407073	0	0		0	34.6766	0	0		0	0.054779	0	0		0	0.0361843	0	0		0	20.3536	0	0		0	0.137871	0	0		0	0.0469971	0	0		0	26.377	0	0		0	0.0585043	0	0		0	0.07094	0	0
	0	0.0429688	0	0		0	36.6031	0	0		0	0.0578222	0	0		0	0.0381945	0	0		0	21.4844	0	0		0	0.145531	0	0		0	0.0496081	0	0		0.00761138	27.8424	0.0273373	17.1804		0	0.0617545	0	0		0	0.0748811	0	0
	0	0.0452303	0	0		0	38.5296	0	0		0	0.0608655	0	0		0	0.0402047	0	0		0	22.6152	0	0		0	0.153191	0	0		0	0.052219	0	0		0	29.3078	0	0		0	0.0650048	0	0		0	0.0788222	0	0
	0	0.0474919	0	0		0	40.456	0	0		0	0.0639088	0	0		0	0.042215	0	0		0	23.7459	0	0		0	0.16085	0	0		0	0.05483	0	0		0	30.7732	0	0		0	0.068255	0	0		0	0.0827633	0	0
	5.62185e-05	0.0497534	0.112994	0.000165612		0	42.3825	0	0		0	0.0669521	0	0		0	0.0442252	0	0		0	24.8767	0	0		0	0.16851	0	0		0	0.0574409	0	0		0	32.2386	0	0		0	0.0715053	0	0		0	0.0867045	0	0
	0	0.0520149	0	0		0	44.309	0	0		0	0.0699953	0	0		0	0.0462355	0	0		0	26.0074	0	0		0	0.176169	0	0		0	0.0600518	0	0		0	33.704	0	0		0	0.0747555	0	0		0	0.0906456	0	0
	0	0.0542764	0	0		0	46.2355	0	0		0	0.0730386	0	0		0	0.0482457	0	0		0	27.1382	0	0		0	0.183829	0	0		0	0.0626628	0	0		0	35.1694	0	0		0	0.0780057	0	0		0	0.0945867	0	0
	0	0.0565379	0	0		0	48.1619	0	0		0	0.0760819	0	0		0	0.0502559	0	0		0	28.269	0	0		0	0.191488	0	0		0	0.0652738	0	0		0	36.6348	0	0		0	0.081256	0	0		0	0.0985278	0	0
	0	0.0587994	0	0		0	50.0884	0	0		0	0.0791252	0	0		0	0.0522662	0	0		0	29.3997	0	0		0	0.199148	0	0		0	0.0678847	0	0		0	38.1001	0	0		0	0.0845062	0	0		0	0.102469	0	0
	0	0.061061	0	0		0	52.0149	0	0		0	0.0821685	0	0		0	0.0542764	0	0		0	30.5305	0	0		0	0.206807	0	0		0	0.0704957	0	0		0	39.5656	0	0		0	0.0877565	0	0		0	0.10641	0	0
	0	0.0633225	0	0		0	53.9414	0	0		0	0.0852117	0	0		0	0.0562866	0	0		0	31.6612	0	0		0	0.214467	0	0		0	0.0731066	0	0		0	41.0309	0	0		0	0.0910067	0	0		0	0.110351	0	0
	0	0.065584	0	0		0	55.8678	0	0		0	0.088255	0	0		0	0.0582969	0	0		0	32.792	0	0		8.88505e-05	0.222126	0.04	0.000726957		0	0.0757175	0	0		0	42.4963	0	0		0	0.0942569	0	0		0	0.114292	0	0
	0	0.0678455	0	0		0.0301012	57.7943	0.0520833	85.0892		0	0.0912983	0	0		0	0.0603071	0	0		0	33.9228	0	0		0	0.229786	0	0		0	0.0783285	0	0		0	43.9617	0	0		0	0.0975072	0	0		0	0.118233	0	0
	0	0.070107	0	0		0	59.7208	0	0		0	0.0943415	0	0		0	0.0623174	0	0		0	35.0535	0	0		9.49781e-05	0.237445	0.04	0.000710529		0	0.0809395	0	0		0	45.4271	0	0		0	0.100757	0	0		0	0.122175	0	0
	0	0.0723685	0	0		0	61.6473	0	0		0	0.0973848	0	0		0	0.0643276	0	0		0	36.1843	0	0		9.80419e-05	0.245105	0.04	0.000702386		0	0.0835504	0	0		0	46.8925	0	0		0	0.104008	0	0		0	0.126116	0	0
	0	0.0746301	0	0		0.0331113	63.5737	0.0520833	82.6732		0	0.100428	0	0		0	0.0663378	0	0		0	37.315	0	0		0	0.252764	0	0		0	0.0861613	0	0		0	48.3579	0	0		0	0.107258	0	0		0	0.130057	0	0
	0	0.0768916	0	0		0	65.5002	0	0		0	0.103471	0	0		0	0.0683481	0	0		0	38.4458	0	0		0.00010417	0.260424	0.04	0.00068624		0	0.0887723	0	0		0	49.8233	0	0		0	0.110508	0	0		0	0.133998	0	0
	0	0.0791531	0	0		0	67.4267	0	0		0	0.106515	0	0		0	0.0703583	0	0		0	39.5765	0	0		0.000107233	0.268083	0.04	0.000678237		0	0.0913833	0	0		0	51.2887	0	0		0	0.113758	0	0		0	0.137939	0	0
	0	0.0814146	0	0		0	69.3532	0	0		0	0.109558	0	0		0	0.0723686	0	0		0	40.7073	0	0		0	0.275743	0	0		0	0.0939942	0	0		0	52.7541	0	0		0	0.117009	0	0		0	0.14188	0	0
	0	0.0836761	0	0		0	71.2797	0	0		0	0.112601	0	0		0	0.0743788	0	0		0	41.8381	0	0		0.000113361	0.283402	0.04	0.000662373		0	0.0966052	0	0		0	54.2195	0	0		0	0.120259	0	0		0	0.145821	0	0
	0	0.0859376	0	0		0	73.2061	0	0		0	0.115644	0	0		0	0.076389	0	0		0	42.9688	0	0		0.000116425	0.291062	0.04	0.000654511		0	0.0992161	0	0		0.0152228	55.6848	0.0273373	13.5761		0	0.123509	0	0		0	0.149762	0	0
	0	0.0881992	0	0		0	75.1326	0	0		0	0.118688	0	0		0	0.0783993	0	0		0	44.0996	0	0		0	0.298721	0	0		0	0.101827	0	0		0	57.1502	0	0		0	0.126759	0	0		0	0.153703	0	0
	0	0.0904607	0	0		0	77.0591	0	0		4.13348e-05	0.121731	0.0339559	8.20169e-05		0	0.0804095	0	0		0	45.2303	0	0		0.000245105	0.306381	0.08	0.00127786		0	0.104438	0	0		0	58.6156	0	0		0	0.13001	0	0		0	0.157644	0	0
	0	0.0927222	0	0		0	78.9856	0	0		0	0.124774	0	0		0	0.0824197	0	0		0	46.3611	0	0		0.000125616	0.314041	0.04	0.000631208		0	0.107049	0	0		0.0164245	60.081	0.0273373	13.0457		0	0.13326	0	0		0	0.161586	0	0
	0	0.0949837	0	0		0	80.912	0	0		0	0.127818	0	0		0	0.08443	0	0		0	47.4919	0	0		0.00012868	0.3217	0.04	0.000623534		0	0.10966	0	0		0	61.5464	0	0		0	0.13651	0	0		0	0.165527	0	0
	0	0.0972452	0	0		0	82.8385	0	0		0	0.130861	0	0		0	0.0864402	0	0		0	48.6226	0	0		0	0.32936	0	0		0	0.112271	0	0		0	63.0118	0	0		0	0.13976	0	0		0.000147749	0.169468	0.087184	0.000376389
	0.000112437	0.0995067	0.112994	0.000125364		0	84.765	0	0		0	0.133904	0	0		0	0.0884504	0	0		0	49.7534	0	0		0	0.337019	0	0		0	0.114882	0	0		0	64.4772	0	0		0	0.143011	0	0		0	0.173409	0	0
	0	0.101768	0	0		0	86.6915	0	0		0	0.136947	0	0		0	0.0904607	0	0		0	50.8841	0	0		0.000137871	0.344679	0.04	0.000600793		0	0.117493	0	0		0	65.9426	0	0		0	0.146261	0	0		0	0.17735	0	0
	0	0.10403	0	0		0	88.618	0	0		0	0.139991	0	0		0	0.0924709	0	0		0	52.0149	0	0		0.000140935	0.352338	0.04	0.000593307		3.24956e-05	0.120104	0.0270563	5.64808e-05		0	67.408	0	0		0	0.149511	0	0		0	0.181291	0	0
	0	0.106291	0	0		0	90.5444	0	0		4.85684e-05	0.143034	0.0339559	7.50608e-05		0	0.0944811	0	0		0	53.1456	0	0		0	0.359998	0	0		0	0.122715	0	0		0	68.8734	0	0		0	0.152761	0	0		0	0.185232	0	0
	0	0.108553	0	0		0	92.4709	0	0		0	0.146077	0	0		0	0.0964914	0	0		0	54.2764	0	0		0.000147063	0.367657	0.04	0.000578475		0	0.125326	0	0		0	70.3387	0	0		0	0.156011	0	0		0	0.189173	0	0
	0	0.110814	0	0		0	94.3974	0	0		0	0.14912	0	0		0	0.0985016	0	0		0	55.4072	0	0		0.000150127	0.375317	0.04	0.00057113		0	0.127937	0	0		0.0392587	71.8041	0.0546747	23.3663		0	0.159262	0	0		0	0.193114	0	0
	0	0.113076	0	0		0	96.3239	0	0		0	0.152164	0	0		0	0.100512	0	0		0.0396479	56.5379	0.0701262	37.0088		0.00015319	0.382976	0.04	0.000563831		3.53213e-05	0.130548	0.0270563	5.39282e-05		0	73.2695	0	0		0	0.162512	0	0		0	0.197056	0	0
	0	0.115337	0	0		0	98.2503	0	0		0	0.155207	0	0		0	0.102522	0	0		0	57.6687	0	0		0.000156254	0.390636	0.04	0.00055658		0	0.133159	0	0		0	74.7349	0	0		0	0.165762	0	0		0	0.200997	0	0
	0	0.117599	0	0		0.208702	100.177	0.208333	272.721		0	0.15825	0	0		0	0.104532	0	0		0	58.7994	0	0		0.000159318	0.398295	0.04	0.000549375		0	0.135769	0	0		0.0208311	76.2003	0.0273373	11.1915		0	0.169012	0	0		0	0.204938	0	0
	0	0.11986	0	0		0	102.103	0	0		0	0.161294	0	0		0	0.106543	0	0		0	59.9302	0	0		0.000487146	0.405955	0.12	0.00162665		0	0.13838	0	0		0	77.6657	0	0		0	0.172263	0	0		0	0.208879	0	0
	0.000137991	0.122122	0.112994	0.000108918		0	104.03	0	0		5.5802e-05	0.164337	0.0339559	6.8413e-05		0	0.108553	0	0		0	61.061	0	0		0	0.413614	0	0		0	0.140991	0	0		0	79.1311	0	0		0	0.175513	0	0		0	0.21282	0	0
	0	0.124383	0	0		0	105.956	0	0		0	0.16738	0	0		0	0.110563	0	0		0	62.1917	0	0		0.00016851	0.421274	0.04	0.000528043		0	0.143602	0	0		0	80.5965	0	0		0	0.178763	0	0		0.000377962	0.216761	0.174368	0.00064831
	0	0.126645	0	0		0	107.883	0	0		0.000231475	0.170424	0.135823	0.000266281		0	0.112573	0	0		0	63.3225	0	0		0	0.428933	0	0		0	0.146213	0	0		0	82.0619	0	0		0	0.182013	0	0		0	0.220702	0	0
	0	0.128907	0	0		0	109.809	0	0		0	0.173467	0	0		0	0.114584	0	0		0.0451986	64.4532	0.0701262	34.5024		0.000523911	0.436593	0.12	0.00154217		0	0.148824	0	0		0	83.5273	0	0		0	0.185264	0	0		0	0.224643	0	0
	0	0.131168	0	0		0	111.736	0	0		0	0.17651	0	0		0	0.116594	0	0		0	65.584	0	0		0.000533103	0.444252	0.12	0.0015214		4.09727e-05	0.151435	0.0270563	4.90001e-05		0.0232347	84.9927	0.0273373	10.24		0	0.188514	0	0		0	0.228584	0	0
	0	0.13343	0	0		0.0591991	113.662	0.0520833	63.1926		0	0.179553	0	0		0	0.118604	0	0		0	66.7147	0	0		0.000180765	0.451912	0.04	0.000500257		0	0.154046	0	0		0	86.458	0	0		0	0.191764	0	0		0	0.232526	0	0
	0.000153323	0.135691	0.112994	9.96059e-05		0	115.589	0	0		0	0.182596	0	0		0	0.120614	0	0		0	67.8455	0	0		0.000367657	0.459571	0.08	0.000986855		0	0.156657	0	0		0.0480719	87.9234	0.0546747	19.8644		0	0.195014	0	0		0	0.236467	0	0
	0	0.137953	0	0		0	117.515	0	0		6.30356e-05	0.18564	0.0339559	6.20733e-05		0	0.122624	0	0		0	68.9763	0	0		0.000747569	0.467231	0.16	0.00194658		0	0.159268	0	0		0	89.3888	0	0		0	0.198265	0	0		0	0.240408	0	0
	0	0.140214	0	0		0	119.442	0	0		0	0.188683	0	0		0	0.124635	0	0		0	70.107	0	0		0.000569869	0.47489	0.12	0.00143973		0	0.161879	0	0		0	90.8542	0	0		0	0.201515	0	0		0	0.244349	0	0
	0.000160989	0.142476	0.112994	9.51057e-05		0.126425	121.368	0.104167	120.855		0	0.191726	0	0		0	0.126645	0	0		0	71.2378	0	0		0.00038604	0.48255	0.08	0.000946443		0	0.16449	0	0		0.0252377	92.3196	0.0273373	9.47936		0	0.204765	0	0		0	0.24829	0	0
	0	0.144737	0	0		0	123.294	0	0		0	0.19477	0	0		0	0.128655	0	0		0	72.3685	0	0		0.000980419	0.49021	0.2	0.0023329		0	0.167101	0	0		0	93.785	0	0		0	0.208015	0	0		0	0.252231	0	0
	0	0.146999	0	0		0	125.221	0	0		0	0.197813	0	0		0	0.130665	0	0		0	73.4993	0	0		0	0.497869	0	0		0	0.169712	0	0		0	95.2504	0	0		0	0.211266	0	0		0	0.256172	0	0
	0.000168656	0.14926	0.112994	9.07096e-05		0	127.147	0	0		0.000136405	0.200856	0.0679117	0.000115467		0	0.132676	0	0		0	74.63	0	0		0.000404423	0.505529	0.08	0.000906876		4.66241e-05	0.172323	0.0270563	4.43081e-05		0.0264395	96.7158	0.0273373	9.03706		0	0.214516	0	0		0	0.260113	0	0
	0	0.151522	0	0		0.201678	129.074	0.15625	173.173		0	0.2039	0	0		0	0.134686	0	0		0	75.7608	0	0		0.000821101	0.513188	0.16	0.00178775		0	0.174934	0	0		0	98.1812	0	0		0	0.217766	0	0		0	0.264055	0	0
	0	0.153783	0	0		0	131	0	0		0	0.206943	0	0		0	0.136696	0	0		0	76.8916	0	0		0.000208339	0.520848	0.04	0.000440484		0	0.177545	0	0		0	99.6466	0	0		0	0.221016	0	0		0	0.267996	0	0
	0.000352643	0.156045	0.225989	0.000172835		0	132.927	0	0		0	0.209986	0	0		0	0.138706	0	0		0.0547141	78.0223	0.0701262	30.4103		0.000634209	0.528507	0.12	0.00130223		0	0.180156	0	0		0.165848	101.112	0.164024	51.632		0	0.224267	0	0		0	0.271937	0	0
	0	0.158306	0	0		0.0702362	134.853	0.0520833	55.7375		7.23359e-05	0.213029	0.0339559	5.43752e-05		0	0.140717	0	0		0	79.1531	0	0		0.000428933	0.536167	0.08	0.000855435		0.000148349	0.182766	0.0811688	0.000126152		0	102.577	0	0		0	0.227517	0	0		0	0.275878	0	0
	0	0.160568	0	0		0	136.78	0	0		0	0.216073	0	0		0	0.142727	0	0		0	80.2839	0	0		0.000652591	0.543826	0.12	0.00126421		0	0.185378	0	0		0.0853275	104.043	0.082012	24.9701		0	0.230767	0	0		0.000487914	0.279819	0.174368	0.000521154
	0	0.162829	0	0		0	138.706	0	0		0	0.219116	0	0		0	0.144737	0	0		0	81.4146	0	0		0.000220594	0.551486	0.04	0.000415138		0	0.187988	0	0		0	105.508	0	0		0	0.234017	0	0		0	0.28376	0	0
	0.000186543	0.165091	0.112994	8.08564e-05		0	140.633	0	0		7.5436e-05	0.222159	0.0339559	5.19223e-05		0	0.146747	0	0		0	82.5454	0	0		0.000894632	0.559145	0.16	0.00163568		0	0.190599	0	0		0	106.974	0	0		0	0.237267	0	0		0.000250829	0.287701	0.087184	0.000253117
	0	0.167352	0	0		0.148499	142.559	0.104167	106.285		0	0.225202	0	0		0	0.148758	0	0		0	83.6761	0	0		0.000906888	0.566805	0.16	0.00161099		0	0.19321	0	0		0.118577	108.439	0.109349	31.637		0	0.240518	0	0		0	0.291642	0	0
	0	0.169614	0	0		0	144.486	0	0		0.000155006	0.228246	0.0679117	0.000100637		0	0.150768	0	0		0	84.8069	0	0		0.000689357	0.574464	0.12	0.00118987		5.2982e-05	0.195821	0.0270563	3.93118e-05		0	109.904	0	0		0	0.243768	0	0		0.000515403	0.295583	0.174368	0.000491532
	0.000388419	0.171875	0.225989	0.000153614		0	146.412	0	0		0	0.231289	0	0		0	0.152778	0	0		0	85.9376	0	0		0.00116425	0.582124	0.2	0.00195272		0	0.198432	0	0		0	111.37	0	0		0	0.247018	0	0		0	0.299525	0	0
	0	0.174137	0	0		0	148.339	0	0		0.000477417	0.234332	0.203735	0.00029244		0	0.154788	0	0		0	87.0684	0	0		0.000943653	0.589783	0.16	0.00153805		0	0.201043	0	0		0.185077	112.835	0.164024	45.0342		0	0.250268	0	0		0.00079372	0.303466	0.261552	0.000715569
	0	0.176398	0	0		0.234789	150.265	0.15625	151.828		0	0.237375	0	0		0	0.156799	0	0		0	88.1992	0	0		0.00167284	0.597443	0.28	0.0026497		0	0.203654	0	0		0	114.3	0	0		0	0.253519	0	0		0	0.307407	0	0
	0.000403751	0.17866	0.225989	0.000145723		0	152.192	0	0		0	0.240419	0	0		0	0.158809	0	0		0	89.3299	0	0		0	0.605102	0	0		5.58077e-05	0.206265	0.0270563	3.71871e-05		0	115.766	0	0		0	0.256769	0	0		0	0.311348	0	0
	0	0.180921	0	0		0	154.118	0	0		8.26696e-05	0.243462	0.0339559	4.64192e-05		0	0.160819	0	0		0	90.4607	0	0		0.000980419	0.612762	0.16	0.0014668		0	0.208876	0	0		0.0961437	117.231	0.082012	21.3382		0	0.260019	0	0		0	0.315289	0	0
	0	0.183183	0	0		0.24382	156.045	0.15625	146.25		0	0.246505	0	0		0	0.162829	0	0		0	91.5914	0	0		0.00148901	0.620421	0.24	0.00216514		0	0.211487	0	0		0	118.697	0	0		0.000421906	0.263269	0.160256	0.000746435		0	0.31923	0	0
	0.000628625	0.185444	0.338983	0.00020706		0	157.971	0	0		8.47364e-05	0.249549	0.0339559	4.49035e-05		8.7448e-05	0.164839	0.0530504	9.87398e-05		0	92.7222	0	0		0.00100493	0.628081	0.16	0.00142024		0	0.214098	0	0		0.131396	120.162	0.109349	27.4264		0	0.26652	0	0		0	0.323171	0	0
	0	0.187706	0	0		0	159.898	0	0		0	0.252592	0	0		0	0.16685	0	0		0	93.853	0	0		0.00152578	0.63574	0.24	0.00209586		5.86334e-05	0.216709	0.0270563	3.51214e-05		0	121.627	0	0		0	0.26977	0	0		0.000855568	0.327112	0.261552	0.000652332
	0	0.189967	0	0		0	161.824	0	0		0.000260409	0.255635	0.101868	0.000130239		0	0.16886	0	0		0	94.9837	0	0		0.0012868	0.6434	0.2	0.00171804		0	0.21932	0	0		0	123.093	0	0		0	0.27302	0	0		0	0.331053	0	0
	0.000434416	0.192229	0.225989	0.000130565		0.426434	163.751	0.260417	231.626		0	0.258678	0	0		9.06473e-05	0.17087	0.0530504	9.59986e-05		0	96.1145	0	0		0.00182297	0.65106	0.28	0.00236566		0.000180139	0.221931	0.0811688	0.000102332		0.238356	124.558	0.191361	45.3685		0	0.27627	0	0		0	0.334994	0	0
	0	0.19449	0	0		0	165.677	0	0		0	0.261722	0	0		0	0.17288	0	0		0	97.2452	0	0		0.00105395	0.658719	0.16	0.00132937		0	0.224542	0	0		0	126.024	0	0		0.00044795	0.279521	0.160256	0.00071131		0.000295497	0.338936	0.087184	0.00020727
	0	0.196752	0	0		0	167.603	0	0		0.000539419	0.264765	0.203735	0.000247345		0	0.174891	0	0		0	98.376	0	0		0.00106621	0.666379	0.16	0.00130712		6.14591e-05	0.227153	0.0270563	3.31148e-05		0	127.489	0	0		0	0.282771	0	0		0	0.342877	0	0
	0.00112437	0.199014	0.564972	0.000308247		0	169.53	0	0		0	0.267808	0	0		0	0.176901	0	0		0	99.5067	0	0		0.00107846	0.674038	0.16	0.00128506		0	0.229764	0	0		0.352527	128.954	0.273373	61.164		0	0.286021	0	0		0.000604739	0.346818	0.174368	0.000401245
	0	0.201275	0	0		0.267901	171.457	0.15625	131.887		0.00027591	0.270852	0.101868	0.00011939		9.49131e-05	0.178911	0.0530504	9.24036e-05		0	100.638	0	0		0.00163607	0.681698	0.24	0.00189479		6.28719e-05	0.232375	0.0270563	3.21336e-05		0	130.42	0	0		0	0.289271	0	0		0	0.350759	0	0
	0	0.203537	0	0		0	173.383	0	0		0	0.273895	0	0		0	0.180921	0	0		0	101.768	0	0		0.000551486	0.689357	0.08	0.000620754		0	0.234986	0	0		0	131.885	0	0		0	0.292521	0	0		0.000618483	0.3547	0.174368	0.000388168
	0.0011627	0.205798	0.564972	0.0002906		0	175.309	0	0		0.000470184	0.276938	0.169779	0.00019197		0	0.182932	0	0		0	102.899	0	0		0.00083642	0.697017	0.12	0.000915008		6.42848e-05	0.237596	0.0270563	3.11672e-05		0.437454	133.351	0.328048	69.146		0	0.295772	0	0		0	0.358641	0	0
	0	0.20806	0	0		0	177.236	0	0		0	0.279981	0	0		0	0.184942	0	0		0	104.03	0	0		0.00366432	0.704676	0.52	0.00389578		0	0.240207	0	0		0	134.816	0	0		0	0.299022	0	0		0.000948341	0.362582	0.261552	0.00056296
	0	0.210321	0	0		0.373255	179.162	0.208333	166.645		0	0.283025	0	0		0	0.186952	0	0		0	105.16	0	0		0.00142467	0.712336	0.2	0.00147198		6.56976e-05	0.242818	0.0270563	3.02155e-05		0.633347	136.281	0.464735	94.0418		0	0.302272	0	0		0	0.366523	0	0
	0	0.212583	0	0		0	181.089	0	0		0.000874231	0.286068	0.305603	0.000327038		0	0.188962	0	0		0	106.291	0	0		0.00287998	0.719995	0.4	0.00289162		0	0.245429	0	0		0	137.747	0	0		0	0.305522	0	0		0.00129194	0.370464	0.348736	0.000725324
	0.00121381	0.214844	0.564972	0.000267881		0	183.015	0	0		0	0.289111	0	0		0	0.190972	0	0		0.150662	107.422	0.140253	44.8595		0.000582124	0.727655	0.08	0.00056795		0.000201331	0.24804	0.0811688	8.78358e-05		0	139.212	0	0		0	0.308773	0	0		0	0.374406	0	0
	0	0.217106	0	0		0.481619	184.942	0.260417	199.879		0.000892832	0.292154	0.305603	0.000314981		0	0.192983	0	0		0	108.553	0	0		0.00205888	0.735314	0.28	0.00195185		0	0.250651	0	0		0.46149	140.678	0.328048	62.3429		0	0.312023	0	0		0.000329858	0.378347	0.087184	0.000175117
	0	0.219367	0	0		0	186.868	0	0		0	0.295198	0	0		0	0.194993	0	0		0	109.684	0	0		0.00118876	0.742974	0.16	0.00109497		0.00020557	0.253262	0.0811688	8.50693e-05		0	142.143	0	0		0	0.315273	0	0		0	0.382288	0	0
	0.000751284	0.221629	0.338983	0.000150869		0	188.795	0	0		0.0010127	0.298241	0.339559	0.000336835		0	0.197003	0	0		0	110.814	0	0		0.00480405	0.750633	0.64	0.00429916		0	0.255873	0	0		0	143.608	0	0		0	0.318524	0	0		0.00033673	0.386229	0.087184	0.000169012
	0	0.22389	0	0		0	190.721	0	0		0	0.301284	0	0		0.000105577	0.199014	0.0530504	8.37165e-05		0	111.945	0	0		0.000909951	0.758293	0.12	0.000791096		0.000209809	0.258484	0.0811688	8.23471e-05		0.55523	145.074	0.382723	68.1684		0	0.321774	0	0		0	0.39017	0	0
	0	0.226152	0	0		0.602024	192.648	0.3125	226.698		0	0.304328	0	0		0	0.201024	0	0		0	113.076	0	0		0.000919143	0.765952	0.12	0.000776241		0	0.261095	0	0		0	146.539	0	0		0	0.325024	0	0		0.00137441	0.394111	0.348736	0.000652057
	0.00206475	0.228413	0.903955	0.000376856		0	194.574	0	0		0.000939333	0.307371	0.305603	0.000285831		0	0.203034	0	0		0.160178	114.207	0.140253	41.5205		0.00216611	0.773612	0.28	0.00177689		0.000214047	0.263706	0.0811688	7.96691e-05		0	148.005	0	0		0	0.328274	0	0		0	0.398052	0	0
	0	0.230675	0	0		0	196.501	0	0		0	0.310414	0	0		0	0.205044	0	0		0	115.337	0	0		0.00218756	0.781271	0.28	0.00174289		0	0.266317	0	0		0.612916	149.47	0.41006	68.3052		0	0.331524	0	0		0.000350474	0.401993	0.087184	0.000157125
	0	0.232936	0	0		0	198.427	0	0		0.00138368	0.313457	0.441426	0.000396596		0	0.207054	0	0		0	116.468	0	0		0.00252458	0.788931	0.32	0.00195339		0.000582095	0.268928	0.21645	0.000205428		0	150.935	0	0		0	0.334775	0	0		0	0.405934	0	0
	0.00159456	0.235198	0.677966	0.00026417		0.626105	200.354	0.3125	213.912		0	0.316501	0	0		0	0.209065	0	0		0	117.599	0	0		0.00254909	0.79659	0.32	0.00191527		0	0.271539	0	0		0.749921	152.401	0.492072	78.2858		0	0.338025	0	0		0.00107204	0.409876	0.261552	0.000454035
	0	0.237459	0	0		0	202.28	0	0		0.00151905	0.319544	0.475382	0.000409934		0	0.211075	0	0		0	118.73	0	0		0.0028953	0.80425	0.36	0.00211223		0.000222524	0.27415	0.0811688	7.4446e-05		0	153.866	0	0		0	0.341275	0	0		0	0.413817	0	0
	0	0.239721	0	0		0	204.207	0	0		0	0.322587	0	0		0.000113043	0.213085	0.0530504	7.78905e-05		0	119.86	0	0		0.00227335	0.811909	0.28	0.00161015		0.000149762	0.276761	0.0541126	4.87786e-05		0	155.331	0	0		0	0.344525	0	0		0.00182109	0.417758	0.43592	0.000728363
	0.00355454	0.241982	1.46893	0.000533701		1.18097	206.133	0.572917	375.036		0	0.32563	0	0		0	0.215095	0	0		0.169693	120.991	0.140253	38.3106		0.00557307	0.819569	0.68	0.00383177		0	0.279372	0	0		0.857282	156.797	0.546747	81.0265		0	0.347776	0	0		0	0.421699	0	0
	0	0.244244	0	0		0	208.06	0	0		0.00156246	0.328674	0.475382	0.00038484		0	0.217106	0	0		0	122.122	0	0		0.00165446	0.827229	0.2	0.00110411		0.000305176	0.281983	0.108225	9.41932e-05		0	158.262	0	0		0	0.351026	0	0		0.00037109	0.42564	0.087184	0.000140109
	0	0.246505	0	0		0	209.986	0	0		0	0.331717	0	0		0	0.219116	0	0		0	123.253	0	0		0.00133582	0.834888	0.16	0.000865171		0	0.284594	0	0		0	159.728	0	0		0	0.354276	0	0		0	0.429581	0	0
	0.00281092	0.248767	1.12994	0.000381834		0	211.912	0	0		0.00147772	0.33476	0.441426	0.000342226		0.000351925	0.221126	0.159151	0.000223967		0	124.383	0	0		0.00202211	0.842548	0.24	0.00127086		0.000155414	0.287204	0.0541126	4.54441e-05		1.05758	161.193	0.656096	90.336		0	0.357526	0	0		0.00113389	0.433522	0.261552	0.00040396
	0	0.251028	0	0		0.890996	213.839	0.416667	256.571		0	0.337804	0	0		0	0.223136	0	0		0	125.514	0	0		0.00238058	0.850207	0.28	0.00145162		0	0.289816	0	0		0	162.658	0	0		0	0.360777	0	0		0	0.437463	0	0
	0	0.25329	0	0		0	215.766	0	0		0	0.340847	0	0		0	0.225147	0	0		0	126.645	0	0		0.0051472	0.857867	0.6	0.00304479		0.000553838	0.292426	0.189394	0.000153374		0	164.124	0	0		0	0.364027	0	0		0.00153934	0.441404	0.348736	0.000517224
	0	0.255551	0	0		0	217.692	0	0		0.0019851	0.34389	0.57725	0.000418659		0	0.227157	0	0		0	127.776	0	0		0.00173105	0.865526	0.2	0.000993223		0	0.295037	0	0		1.26749	165.589	0.765446	97.643		0	0.367277	0	0		0	0.445346	0	0
	0.00291314	0.257813	1.12994	0.000345179		0	219.618	0	0		0	0.346933	0	0		0.000121574	0.229167	0.0530504	7.14896e-05		0.361589	128.906	0.280505	69.4578		0.00663621	0.873186	0.76	0.00369265		0.00032213	0.297648	0.108225	8.44553e-05		0	167.054	0	0		0	0.370527	0	0		0.00274194	0.449287	0.610288	0.00086847
	0	0.260074	0	0		1.26927	221.545	0.572917	331.215		0.0019014	0.349977	0.543294	0.000376423		0	0.231177	0	0		0	130.037	0	0		0.00176169	0.880845	0.2	0.000950511		0	0.300259	0	0		1.24386	168.52	0.738108	89.3326		0	0.373777	0	0		0	0.453228	0	0
	0	0.262336	0	0		0	223.471	0	0		0	0.35302	0	0		0	0.233187	0	0		0	131.168	0	0		0.00497563	0.888505	0.56	0.00260262		0.000245836	0.30287	0.0811688	6.09955e-05		0	169.985	0	0		0	0.377028	0	0		0.00239147	0.457169	0.523104	0.000713619
	0.00239184	0.264597	0.903955	0.000255121		0	225.398	0	0		0.00229718	0.356063	0.645161	0.000426569		0.000124773	0.235198	0.0530504	6.916e-05		0	132.299	0	0		0.00250926	0.896164	0.28	0.00127223		0	0.305481	0	0		0	171.451	0	0		0	0.380278	0	0		0	0.46111	0	0
	0	0.266859	0	0		0.828786	227.324	0.364583	200.762		0	0.359106	0	0		0	0.237208	0	0		0	133.429	0	0		0.00180765	0.903824	0.2	0.000888203		0.000583508	0.308092	0.189394	0.000136952		1.03995	172.916	0.601422	67.0883		0	0.383528	0	0		0.00283815	0.465051	0.610288	0.0007974
	0	0.26912	0	0		0	229.251	0	0		0	0.36215	0	0		0	0.239218	0	0		0	134.56	0	0		0.00510431	0.911483	0.56	0.00243013		0	0.310703	0	0		0	174.381	0	0		0	0.386779	0	0		0	0.468992	0	0
	0.00429305	0.271382	1.58192	0.000411129		0	231.177	0	0		0.00334812	0.365193	0.916808	0.000563895		0	0.241229	0	0		0.475775	135.691	0.350631	79.497		0.00330891	0.919143	0.36	0.00152611		0.000508627	0.313314	0.162338	0.000112873		0	175.847	0	0		0	0.390029	0	0		0.00288625	0.472933	0.610288	0.000763003
	0	0.273643	0	0		0	233.104	0	0		0	0.368236	0	0		0	0.243239	0	0		0	136.822	0	0		0.00444865	0.926802	0.48	0.00198721		0	0.315925	0	0		1.55112	177.312	0.874795	89.6285		0	0.393279	0	0		0	0.476874	0	0
	0	0.275905	0	0		1.34653	235.03	0.572917	295.104		0.00239535	0.37128	0.645161	0.000377577		0	0.245249	0	0		0	137.952	0	0		0.00373785	0.934462	0.4	0.00161682		0.000603288	0.318536	0.189394	0.000126521		0	178.778	0	0		0	0.396529	0	0		0.00209597	0.480816	0.43592	0.000520975
	0.00282881	0.278167	1.01695	0.000242519		0	236.957	0	0		0	0.374323	0	0		0	0.247259	0	0		0	139.083	0	0		0.00602958	0.942121	0.64	0.00252495		0	0.321147	0	0		0	180.243	0	0		0	0.399779	0	0		0	0.484757	0	0
	0	0.280428	0	0		0	238.883	0	0		0.00333159	0.377366	0.882852	0.000491012		0.000528954	0.249269	0.212202	0.000255497		0	140.214	0	0		0.00113974	0.949781	0.12	0.000461953		0.000875968	0.323758	0.270563	0.000173515		1.5399	181.708	0.847458	79.4494		0	0.40303	0	0		0.000852132	0.488698	0.174368	0.000198995
	0	0.28269	0	0		0	240.81	0	0		0	0.38041	0	0		0	0.25128	0	0		0	141.345	0	0		0.0080425	0.957441	0.84	0.00315432		0	0.326369	0	0		0	183.174	0	0		0	0.40628	0	0		0	0.492639	0	0
	0.00515166	0.284951	1.80791	0.000394094		1.64353	242.736	0.677083	325.478		0	0.383453	0	0		0	0.25329	0	0		1.19895	142.476	0.841515	173.987		0.00540456	0.9651	0.56	0.00205064		0.000979106	0.32898	0.297619	0.000183076		1.41331	184.639	0.765446	67.4823		0	0.40953	0	0		0.00432938	0.49658	0.87184	0.000949088
	0	0.287213	0	0		0	244.663	0	0		0.00301847	0.386496	0.780985	0.000401377		0	0.2553	0	0		0	143.606	0	0		0.00622566	0.97276	0.64	0.00228464		0	0.331591	0	0		0	186.105	0	0		0	0.41278	0	0		0	0.500521	0	0
	0	0.289474	0	0		0	246.589	0	0		0	0.389539	0	0		0.000409513	0.25731	0.159151	0.000182845		0	144.737	0	0		0.00980419	0.980419	1	0.0034788		0.000904225	0.334202	0.270563	0.000159498		0	187.57	0	0		0	0.416031	0	0		0.00483791	0.504462	0.959024	0.00099471
	0.00560396	0.291736	1.9209	0.000381126		0	248.516	0	0		0.00439906	0.392583	1.12054	0.00054538		0	0.259321	0	0		0	145.868	0	0		0.00395231	0.988078	0.4	0.00135562		0	0.336813	0	0		1.70535	189.035	0.902132	72.2594		0	0.419281	0	0		0	0.508403	0	0
	0	0.293997	0	0		1.43482	250.442	0.572917	256.386		0	0.395626	0	0		0	0.261331	0	0		0	146.999	0	0		0.00756761	0.995738	0.76	0.00250834		0.000459177	0.339423	0.135281	7.63556e-05		0	190.501	0	0		0	0.422531	0	0		0.00134005	0.512344	0.261552	0.000258168
	0	0.296259	0	0		0	252.369	0	0		0.00324892	0.398669	0.814941	0.000375057		0.000698518	0.263341	0.265252	0.000293994		0	148.129	0	0		0.00361223	1.0034	0.36	0.00115669		0	0.342035	0	0		0	191.966	0	0		0	0.425781	0	0		0	0.516286	0	0
	0.00472235	0.29852	1.58192	0.000284361		0	254.295	0	0		0	0.401712	0	0		0	0.265351	0	0		0.837364	149.26	0.56101	105.304		0.00808846	1.01106	0.8	0.00250142		0.000559489	0.344645	0.162338	8.7643e-05		1.85077	193.431	0.956807	69.2948		0	0.429032	0	0		0.00453554	0.520227	0.87184	0.000817922
	0	0.300782	0	0		2.00173	256.221	0.78125	330.775		0	0.404756	0	0		0	0.267362	0	0		0	150.391	0	0		0.00407487	1.01872	0.4	0.00121668		0	0.347256	0	0		0	194.897	0	0		0	0.432282	0	0		0	0.524168	0	0
	0	0.303043	0	0		0	258.148	0	0		0.00443109	0.407799	1.08659	0.000458417		0	0.269372	0	0		0	151.522	0	0		0.0049266	1.02638	0.48	0.00141975		0.000473305	0.349867	0.135281	6.97899e-05		0	196.362	0	0		0	0.435532	0	0		0.00598554	0.528109	1.13339	0.00100928
	0	0.305305	0	0		0	260.074	0	0		0	0.410842	0	0		0.000287938	0.271382	0.106101	0.000111985		0	152.652	0	0		0.0115812	1.03404	1.12	0.00322008		0.00123978	0.352478	0.351732	0.000177306		2.43364	197.828	1.23018	80.1263		0	0.438782	0	0		0	0.53205	0	0
	0.00729818	0.307566	2.37288	0.000370925		0	262.001	0	0		0.00548099	0.413886	1.32428	0.000526075		0	0.273392	0	0		0	153.783	0	0		0.00291675	1.0417	0.28	0.000782187		0	0.355089	0	0		0	199.293	0	0		0	0.442033	0	0		0.00327109	0.535991	0.610288	0.000515126
	0	0.309828	0	0		2.74924	263.927	1.04167	408.618		0	0.416929	0	0		0	0.275402	0	0		0	154.914	0	0		0.0109133	1.04936	1.04	0.00282166		0.00116136	0.3577	0.324675	0.000156142		2.90875	200.758	1.44888	87.6412		0	0.445283	0	0		0	0.539932	0	0
	0	0.312089	0	0		0	265.854	0	0		0.0055616	0.419972	1.32428	0.000494435		0.000147169	0.277413	0.0530504	5.39333e-05		0	156.045	0	0		0.00253683	1.05701	0.24	0.000632145		0	0.360311	0	0		0	202.224	0	0		0	0.448533	0	0		0.00284502	0.543873	0.523104	0.000417903
	0.00781437	0.314351	2.48588	0.00034756		0	267.78	0	0		0	0.423015	0	0		0	0.279423	0	0		0.661327	157.175	0.420757	70.1156		0.00766565	1.06467	0.72	0.00184025		0.0014729	0.362922	0.405844	0.000185994		0	203.689	0	0		0	0.451783	0	0		0	0.547814	0	0
	0	0.316612	0	0		0	269.707	0	0		0	0.426059	0	0		0	0.281433	0	0		0	158.306	0	0		0.00343147	1.07233	0.32	0.000793294		0	0.365533	0	0		2.57986	205.155	1.25752	67.7098		0	0.455033	0	0		0.00288625	0.551756	0.523104	0.00039492
	0	0.318874	0	0		2.82951	271.633	1.04167	377.441		0.00801379	0.429102	1.86757	0.000632945		0	0.283444	0	0		0	159.437	0	0		0.00907194	1.07999	0.84	0.00201882		0.00109567	0.368144	0.297619	0.000129822		0	206.62	0	0		0	0.458284	0	0		0	0.555697	0	0
	0.00580584	0.321135	1.80791	0.000224596		0	273.56	0	0		0	0.432145	0	0		0.000302869	0.285454	0.106101	0.000102495		0	160.568	0	0		0.00652591	1.08765	0.6	0.00139731		0	0.370755	0	0		0	208.085	0	0		0	0.461534	0	0		0	0.559638	0	0
	0	0.323397	0	0		0	275.486	0	0		0.00679751	0.435188	1.56197	0.000494947		0	0.287464	0	0		0	161.698	0	0		0.00481937	1.09531	0.44	0.00099242		0.00101019	0.373366	0.270563	0.000112193		3.03614	209.551	1.44888	68.9459		0	0.464784	0	0		0.0039308	0.563579	0.697472	0.000482218
	0	0.325658	0	0		2.0228	277.413	0.729167	248.408		0	0.438232	0	0		0	0.289474	0	0		0	162.829	0	0		0.0101473	1.10297	0.92	0.00200867		0	0.375977	0	0		0	211.016	0	0		0	0.468035	0	0		0	0.56752	0	0
	0.00704009	0.32792	2.14689	0.000235227		0	279.339	0	0		0.00599355	0.441275	1.35823	0.000401459		0.000463901	0.291484	0.159151	0.000147834		1.26477	163.96	0.771389	115.388		0.00577528	1.11063	0.52	0.00109842		0.00153648	0.378588	0.405844	0.000159768		0	212.482	0	0		0	0.471285	0	0		0.00348756	0.571461	0.610288	0.000397023
	0	0.330181	0	0		0	281.266	0	0		0	0.444318	0	0		0	0.293495	0	0		0	165.091	0	0		0.0102883	1.11829	0.92	0.00187912		0	0.381199	0	0		3.21681	213.947	1.50355	62.7188		0	0.474535	0	0		0	0.575402	0	0
	0	0.332443	0	0		0	283.192	0	0		0	0.447362	0	0		0	0.295505	0	0		0	166.221	0	0		0.00495418	1.12595	0.44	0.000868504		0.00124614	0.38381	0.324675	0.000121175		0	215.412	0	0		0	0.477785	0	0		0.00555604	0.579343	0.959024	0.000585928
	0.00794214	0.334705	2.37288	0.000227376		4.00948	285.119	1.40625	439.905		0.00810576	0.450405	1.79966	0.000476938		0	0.297515	0	0		0	167.352	0	0		0.0136033	1.13361	1.2	0.00228769		0	0.386421	0	0		3.26087	216.878	1.50355	57.1559		0	0.481035	0	0		0	0.583284	0	0
	0	0.336966	0	0		0	287.045	0	0		0	0.453448	0	0		0.000635597	0.299525	0.212202	0.000186848		0	168.483	0	0		0.0059346	1.14127	0.52	0.000956852		0.00252618	0.389032	0.649351	0.000229426		0	218.343	0	0		0	0.484286	0	0		0.00563163	0.587226	0.959024	0.000549154
	0	0.339228	0	0		0	288.972	0	0		0.00945534	0.456491	2.07131	0.00050865		0	0.301536	0	0		0	169.614	0	0		0.00827229	1.14893	0.72	0.00127798		0	0.391643	0	0		0	219.809	0	0		0	0.487536	0	0		0	0.591167	0	0
	0.00733141	0.341489	2.14689	0.000178193		0	290.898	0	0		0	0.459535	0	0		0	0.303546	0	0		1.55658	170.744	0.911641	121.658		0.00555162	1.15659	0.48	0.00082129		0.00170672	0.394253	0.4329	0.000144571		4.35531	221.274	1.96829	64.5326		0	0.490786	0	0		0.0067449	0.595108	1.13339	0.000606949
	0	0.343751	0	0		3.35528	292.825	1.14583	327.888		0.00832483	0.462578	1.79966	0.000408277		0	0.305556	0	0		0	171.875	0	0		0.00698549	1.16425	0.6	0.000988943		0	0.396864	0	0		0	222.739	0	0		0	0.494036	0	0		0	0.599049	0	0
	0	0.346012	0	0		0	294.751	0	0		0	0.465621	0	0		0.00032633	0.307566	0.106101	8.84293e-05		0	173.006	0	0		0.0103128	1.17191	0.88	0.00139624		0.00205358	0.399475	0.514069	0.000162007		0	224.205	0	0		0	0.497287	0	0		0.00630852	0.60299	1.04621	0.000522744
	0	0.348274	0	0		0	296.678	0	0		0	0.468664	0	0		0	0.309577	0	0		0	174.137	0	0		0.00896471	1.17957	0.76	0.00115991		0	0.402086	0	0		2.89953	225.67	1.28486	35.9053		0	0.500537	0	0		0	0.606931	0	0
	0.0102982	0.350535	2.93785	0.000197824		0	298.604	0	0		0.00912983	0.471708	1.93548	0.000387473		0	0.311587	0	0		0	175.268	0	0		0.00949781	1.18723	0.8	0.00117355		0.00208042	0.404697	0.514069	0.000152616		0	227.136	0	0		0	0.503787	0	0		0.00692357	0.610872	1.13339	0.000527071
	0	0.352797	0	0		4.38274	300.531	1.45833	380.158		0	0.474751	0	0		0.00116455	0.313597	0.371353	0.000296707		0	176.398	0	0		0.00621341	1.19489	0.52	0.000732604		0	0.407308	0	0		0	228.601	0	0		0	0.507037	0	0		0	0.614813	0	0
	0	0.355058	0	0		0	302.457	0	0		0.00957211	0.477794	2.0034	0.000367305		0	0.315607	0	0		0	177.529	0	0		0.00721527	1.20254	0.6	0.000811167		0.00277272	0.409919	0.676407	0.000188823		4.2139	230.066	1.8316	43.025		0	0.510288	0	0		0.00323673	0.618754	0.523104	0.000225806
	0.00807502	0.35732	2.25989	0.000128049		0	304.383	0	0		0	0.480838	0	0		0	0.317617	0	0		2.50575	178.66	1.40253	162.397		0.0053249	1.2102	0.44	0.000570329		0	0.41253	0	0		0	231.532	0	0		0	0.513538	0	0		0	0.622696	0	0
	0	0.359581	0	0		3.35026	306.31	1.09375	265.072		0.00821529	0.483881	1.69779	0.00028392		0	0.319628	0	0		0	179.791	0	0		0.0112043	1.21786	0.92	0.00114231		0.00247108	0.415141	0.595238	0.00015594		4.64975	232.997	1.99563	41.38		0	0.516788	0	0		0.00437061	0.626637	0.697472	0.000278663
	0	0.361843	0	0		0	308.236	0	0		0	0.486924	0	0		0.00102378	0.321638	0.318302	0.000240057		0	180.921	0	0		0.00686293	1.22552	0.56	0.000665416		0	0.417752	0	0		0	234.463	0	0		0	0.520038	0	0		0	0.630578	0	0
	0.0139882	0.364104	3.84181	0.000180212		0	310.163	0	0		0	0.489967	0	0		0	0.323648	0	0		0	182.052	0	0		0.00641255	1.23318	0.52	0.000590734		0.00341204	0.420363	0.811688	0.000199146		0	235.928	0	0		0	0.523289	0	0		0.00719158	0.634519	1.13339	0.000417818
	0	0.366366	0	0		0	312.089	0	0		0.00853771	0.493011	1.73175	0.00025015		0	0.325658	0	0		0	183.183	0	0		0.00992674	1.24084	0.8	0.000867982		0	0.422974	0	0		5.12686	237.393	2.15965	36.5518		0	0.526539	0	0		0	0.63846	0	0
	0	0.368627	0	0		6.70555	314.016	2.13542	467.556		0	0.496054	0	0		0.00104298	0.327669	0.318302	0.000229629		0	184.314	0	0		0.00848981	1.2485	0.68	0.000703873		0.00299383	0.425585	0.703463	0.000161277		0	238.859	0	0		0	0.529789	0	0		0.00728092	0.642401	1.13339	0.000384217
	0.00963892	0.370889	2.59887	9.89518e-05		0	315.942	0	0		0.00898205	0.499097	1.79966	0.000234297		0	0.329679	0	0		2.08072	185.444	1.12202	114.051		0.0105518	1.25616	0.84	0.000828581		0	0.428196	0	0		0	240.324	0	0		0	0.533039	0	0		0	0.646342	0	0
	0	0.37315	0	0		0	317.869	0	0		0	0.50214	0	0		0	0.331689	0	0		0	186.575	0	0		0.00606634	1.26382	0.48	0.000450664		0.00407961	0.430807	0.94697	0.000202387		3.63543	241.789	1.50355	20.2995		0	0.536289	0	0		0.00453554	0.650283	0.697472	0.00021663
	0	0.375412	0	0		0	319.795	0	0		0.0104639	0.505184	2.07131	0.00024166		0	0.333699	0	0		0	187.706	0	0		0.0106804	1.27148	0.84	0.000749723		0.00363527	0.433418	0.838745	0.000172912		0	243.255	0	0		0	0.53954	0	0		0	0.654224	0	0
	0.00768149	0.377673	2.0339	6.13474e-05		6.03228	321.722	1.875	368.891		0	0.508227	0	0		0.00106857	0.33571	0.318302	0.000216086		0	188.837	0	0		0.00562822	1.27914	0.44	0.000372834		0	0.436029	0	0		0	244.72	0	0		0	0.54279	0	0		0.0126239	0.658166	1.91805	0.000543636
	0	0.379935	0	0		0	323.648	0	0		0	0.51127	0	0		0	0.33772	0	0		0	189.967	0	0		0.016471	1.2868	1.28	0.00102828		0.00344171	0.43864	0.784632	0.000150204		5.18215	246.186	2.10498	22.0257		0	0.54604	0	0		0	0.662107	0	0
	0	0.382196	0	0		0	325.575	0	0		0.0118755	0.514314	2.309	0.000225776		0	0.33973	0	0		0	191.098	0	0		0.00983789	1.29446	0.76	0.00057799		0	0.441251	0	0		0	247.651	0	0		0	0.549291	0	0		0.0104524	0.666048	1.56931	0.000404119
	0.0117292	0.384458	3.05085	7.06898e-05		7.33466	327.501	2.23958	405.057		0	0.517357	0	0		0.00108777	0.34174	0.318302	0.000206199		2.69606	192.229	1.40253	124.022		0.00781271	1.30212	0.6	0.000431311		0.00276213	0.443862	0.622294	0.000110305		5.85676	249.116	2.35101	20.3444		0.000885482	0.552541	0.160256	0.000247774		0	0.669989	0	0
	0	0.386719	0	0		0	329.428	0	0		0.0114859	0.5204	2.20713	0.000190065		0	0.343751	0	0		0	193.36	0	0		0.0157173	1.30978	1.2	0.000814035		0	0.446472	0	0		0	250.582	0	0		0	0.555791	0	0		0.00940094	0.67393	1.39494	0.000324794
	0	0.388981	0	0		0	331.354	0	0		0	0.523443	0	0		0	0.345761	0	0		0	194.49	0	0		0.0042158	1.31744	0.32	0.000204497		0.00486021	0.449083	1.08225	0.000177082		0	252.047	0	0		0	0.559041	0	0		0	0.677871	0	0
	0.00928372	0.391242	2.37288	4.05746e-05		0	333.281	0	0		0.0101901	0.526487	1.93548	0.000145526		0	0.347771	0	0		0	195.621	0	0		0.0111308	1.3251	0.84	0.000504766		0	0.451694	0	0		5.96011	253.513	2.35101	14.718		0.000901108	0.562291	0.160256	0.000235638		0.00653874	0.681812	0.959024	0.000200823
	0	0.393504	0	0		7.50724	335.207	2.23958	359.968		0	0.52953	0	0		0.000927802	0.349781	0.265252	0.000161146		0	196.752	0	0		0.00746344	1.33276	0.56	0.000315811		0.00344171	0.454305	0.757576	0.000114043		0	254.978	0	0		0	0.565542	0	0		0	0.685753	0	0
	0	0.395765	0	0		0	337.134	0	0		0	0.532573	0	0		0	0.351791	0	0		0	197.883	0	0		0.006434	1.34042	0.48	0.000253514		0	0.456916	0	0		0	256.443	0	0		0.000911525	0.568792	0.160256	0.000227716		0.00962085	0.689694	1.39494	0.00026115
	0	0.398027	0	0		0	339.06	0	0		0.0103668	0.535617	1.93548	0.000116494		0	0.353802	0	0		0	199.013	0	0		0.00485307	1.34808	0.36	0.000177673		0.00559489	0.459527	1.21753	0.000168014		5.71094	257.909	2.21433	9.41904		0	0.572042	0	0		0	0.693636	0	0
	0.00995068	0.400288	2.48588	2.59432e-05		0	340.986	0	0		0	0.53866	0	0		0.0028314	0.355812	0.795756	0.000460072		2.94743	200.144	1.47265	109.223		0.0135574	1.35574	1	0.000460089		0	0.462138	0	0		0	259.374	0	0		0	0.575292	0	0		0.0133798	0.697577	1.91805	0.000318902
	0	0.40255	0	0		7.32262	342.913	2.13542	302.769		0.0139794	0.541703	2.58065	0.00013191		0	0.357822	0	0		0	201.275	0	0		0.00818037	1.36339	0.6	0.000256692		0.00616145	0.464749	1.32576	0.000167045		0	260.839	0	0		0	0.578543	0	0		0	0.701518	0	0
	0	0.404811	0	0		0	344.839	0	0		0	0.544746	0	0		0	0.359832	0	0		0	202.406	0	0		0.00767791	1.37105	0.56	0.000222162		0	0.46736	0	0		5.44975	262.305	2.07764	5.47159		0	0.581793	0	0		0.00984075	0.705459	1.39494	0.00020444
	0.0114992	0.407073	2.82486	1.83985e-05		0	346.766	0	0		0.0119044	0.54779	2.17318	9.29735e-05		0	0.361843	0	0		0	203.536	0	0		0.0121327	1.37871	0.88	0.00032278		0.0047048	0.469971	1.00108	0.000114673		0	263.77	0	0		0	0.585043	0	0		0	0.7094	0	0
	0	0.409335	0	0		6.9012	348.692	1.97917	254.036		0	0.550833	0	0		0.00270236	0.363853	0.742706	0.000401161		0	204.667	0	0		0.00831824	1.38637	0.6	0.000202825		0	0.472582	0	0		4.93057	265.236	1.85894	3.28702		0	0.588293	0	0		0.0099507	0.713341	1.39494	0.000178684
	0	0.411596	0	0		0	350.619	0	0		0	0.553876	0	0		0	0.365863	0	0		0	205.798	0	0		0.0105947	1.39403	0.76	0.000235953		0.00527135	0.475193	1.10931	0.000114973		0	266.701	0	0		0	0.591544	0	0		0	0.717282	0	0
	0.00935271	0.413858	2.25989	7.93313e-06		0	352.545	0	0		0.0117246	0.556919	2.10526	6.66792e-05		0	0.367873	0	0		3.91801	206.929	1.89341	119.176		0.00448542	1.40169	0.32	9.08983e-05		0	0.477804	0	0		0	268.166	0	0		0	0.594794	0	0		0.0069167	0.721223	0.959024	0.000106331
	0	0.416119	0	0		0	354.472	0	0		0	0.559963	0	0		0	0.369884	0	0		0	208.06	0	0		0.0107111	1.40935	0.76	0.000196708		0.00558924	0.480415	1.16342	0.000108529		6.04423	269.632	2.24166	1.77616		0	0.598044	0	0		0	0.725164	0	0
	0	0.418381	0	0		6.49685	356.398	1.82292	203.234		0.0126174	0.563006	2.24109	5.64579e-05		0.00118375	0.371894	0.318302	0.000160235		0	209.19	0	0		0.00623485	1.41701	0.44	0.000103297		0	0.483026	0	0		0	271.097	0	0		0	0.601294	0	0		0.00635663	0.729106	0.87184	8.27338e-05
	0.0171109	0.420642	4.0678	5.81046e-06		0	358.325	0	0		0	0.566049	0	0		0	0.373904	0	0		0	210.321	0	0		0.00911789	1.42467	0.64	0.000135605		0.0053872	0.485637	1.10931	9.25942e-05		0	272.563	0	0		0	0.604545	0	0		0	0.733047	0	0
	0	0.422904	0	0		0	360.251	0	0		0	0.569093	0	0		0	0.375914	0	0		0	211.452	0	0		0.0137504	1.43233	0.96	0.000182563		0	0.488248	0	0		5.54349	274.028	2.02296	0.41059		0	0.607795	0	0		0.0134932	0.736988	1.83086	0.000146762
	0	0.425165	0	0		0	362.178	0	0		0.0126278	0.572136	2.20713	3.7214e-05		0.00200491	0.377925	0.530504	0.000252895		0	212.583	0	0		0.00806394	1.43999	0.56	9.49941e-05		0.00571075	0.490859	1.16342	8.63271e-05		0	275.493	0	0		0	0.611045	0	0		0	0.740929	0	0
	0.00772749	0.427427	1.80791	4.82672e-07		6.82695	364.104	1.875	179.642		0	0.575179	0	0		0	0.379935	0	0		6.2945	213.713	2.9453	155.034		0.00752778	1.44765	0.52	7.81382e-05		0	0.49347	0	0		0	276.959	0	0		0	0.614295	0	0		0.0103905	0.74487	1.39494	9.29968e-05
	0	0.429688	0	0		0	366.031	0	0		0.0123694	0.578222	2.13922	2.61686e-05		0	0.381945	0	0		0	214.844	0	0		0.00407487	1.45531	0.28	3.69804e-05		0.0057715	0.49608	1.16342	7.61781e-05		5.86076	278.424	2.10498	0.000249915		0.000989656	0.617545	0.160256	0.000172622		0	0.748811	0	0
	0	0.43195	0	0		0	367.957	0	0		0	0.581266	0	0		0	0.383955	0	0		0	215.975	0	0		0.018726	1.46297	1.28	0.000147271		0	0.498692	0	0		0	279.89	0	0		0	0.620796	0	0		0.0105005	0.752752	1.39494	7.59083e-05
	0.00883141	0.434211	2.0339	5.32137e-08		0	369.884	0	0		0.0115076	0.584309	1.96944	1.64364e-05		0.00204756	0.385966	0.530504	0.000234611		0	217.106	0	0		0.00705901	1.47063	0.48	4.76215e-05		0.00651042	0.501302	1.2987	7.44149e-05		6.84543	281.355	2.43302	0.193736		0	0.624046	0	0		0	0.756693	0	0
	0	0.436473	0	0		11.2318	371.81	3.02083	245.647		0	0.587352	0	0		0	0.387976	0	0		0	218.236	0	0		0.0124176	1.47829	0.84	7.10125e-05		0	0.503913	0	0		0	282.82	0	0		0	0.627296	0	0		0.0112736	0.760634	1.48213	6.43377e-05
	0	0.438734	0	0		0	373.737	0	0		0	0.590395	0	0		0	0.389986	0	0		0	219.367	0	0		0.00713255	1.48595	0.48	3.4099e-05		0.00767461	0.506524	1.51515	7.52524e-05		0	284.286	0	0		0	0.630546	0	0		0	0.764576	0	0
	0	0.440996	0	0		0	375.663	0	0		0.00926933	0.593439	1.56197	6.09822e-06		0.00124773	0.391996	0.318302	0.000132809		0	220.498	0	0		0.00896164	1.49361	0.6	3.52292e-05		0.00785193	0.509135	1.54221	7.10257e-05		6.9524	285.751	2.43302	1.26761		0.0020314	0.633797	0.320513	0.0003119		0.0107204	0.768517	1.39494	4.69313e-05
	0.0090154	0.443257	2.0339	2.3128e-06		10.8164	377.59	2.86458	204.039		0	0.596482	0	0		0	0.394006	0	0		7.14931	221.629	3.22581	134.77		0.0150127	1.50127	1	4.7563e-05		0	0.511746	0	0		0	287.217	0	0		0	0.637047	0	0		0	0.772458	0	0
	0	0.445519	0	0		0	379.516	0	0		0.0120109	0.599525	2.0034	3.74511e-06		0	0.396017	0	0		0	222.759	0	0		0.00784642	1.50893	0.52	1.95444e-05		0.00681913	0.514357	1.32576	5.20223e-05		0	288.682	0	0		0.00205223	0.640297	0.320513	0.000299037		0.0121841	0.776399	1.56931	3.94231e-05
	0	0.44778	0	0		0	381.442	0	0		0	0.602569	0	0		0	0.398027	0	0		0	223.89	0	0		0.00849288	1.51659	0.56	1.61168e-05		0	0.516968	0	0		6.66276	290.147	2.29634	3.09749		0	0.643547	0	0		0	0.78034	0	0
	0.00610226	0.450042	1.35593	4.12795e-06		0	383.369	0	0		0.00884255	0.605612	1.4601	8.40234e-07		0.00233443	0.400037	0.583554	0.00022469		0	225.021	0	0		0.00487758	1.52425	0.32	6.76765e-06		0.00773183	0.519579	1.48809	4.90628e-05		0	291.613	0	0		0	0.646798	0	0		0	0.784281	0	0
	0	0.452303	0	0		9.43171	385.296	2.44792	143.974		0	0.608655	0	0		0	0.402048	0	0		0	226.152	0	0		0.00735314	1.53191	0.48	7.05135e-06		0	0.52219	0	0		0	293.078	0	0		0.00416697	0.650048	0.641026	0.000560499		0.010308	0.788222	1.30776	1.91811e-05
	0	0.454565	0	0		0	387.222	0	0		0	0.611698	0	0		0	0.404058	0	0		0	227.282	0	0		0.00369495	1.53956	0.24	2.2574e-06		0.00922945	0.524801	1.75866	4.79166e-05		7.891	294.543	2.67906	6.86726		0	0.653298	0	0		0	0.792163	0	0
	0.0108399	0.456826	2.37288	1.39341e-05		0	389.148	0	0		0.012107	0.614742	1.96944	4.69427e-08		0.00236963	0.406068	0.583554	0.000211091		4.64515	228.413	2.03366	68.0633		0.00990223	1.54722	0.64	3.38824e-06		0	0.527412	0	0		0	296.009	0	0		0.00105216	0.656548	0.160256	0.000134032		0.0152697	0.796105	1.91805	1.77438e-05
	0	0.459088	0	0		0	391.075	0	0		0	0.617785	0	0		0	0.408078	0	0		0	229.544	0	0		0.00310977	1.55488	0.2	4.71242e-07		0.00760044	0.530023	1.43398	3.16442e-05		6.50572	297.474	2.18699	7.84618		0	0.659799	0	0		0	0.800046	0	0
	0	0.461349	0	0		8.39222	393.001	2.13542	101.623		0.00822149	0.620828	1.32428	7.7103e-07		0	0.410088	0	0		0	230.675	0	0		0.00312509	1.56254	0.2	1.18271e-07		0	0.532634	0	0		0	298.94	0	0		0	0.663049	0	0		0.00700947	0.803987	0.87184	4.42677e-06
	0.00890552	0.463611	1.9209	1.84804e-05		0	394.928	0	0		0	0.623872	0	0		0	0.412099	0	0		0	231.805	0	0		0.00628081	1.5702	0.4	3.83229e-12		0.00999239	0.535245	1.86688	3.25472e-05		0	300.405	0	0		0.00320336	0.666299	0.480769	0.000375437		0	0.807928	0	0
	0	0.465873	0	0		0	396.854	0	0		0.00808923	0.626915	1.29032	2.42781e-06		0.00263624	0.414109	0.636605	0.000211221		0	232.936	0	0		0.00631145	1.57786	0.4	2.32809e-07		0	0.537856	0	0		6.0242	301.87	1.99563	10.8687		0	0.669549	0	0		0.0148642	0.811869	1.83086	3.93005e-06
	0	0.468134	0	0		10.3849	398.781	2.60417	104.035		0	0.629958	0	0		0	0.416119	0	0		0	234.067	0	0		0.0076105	1.58552	0.48	1.12188e-06		0.00994365	0.540467	1.83983	2.45542e-05		0	303.336	0	0		0.0010782	0.6728	0.160256	0.000119391		0	0.81581	0	0
	0.00584672	0.470396	1.24294	1.77613e-05		0	400.707	0	0		0	0.633001	0	0		0	0.418129	0	0		7.9169	235.198	3.36606	87.7823		0.00573545	1.59318	0.36	1.89581e-06		0	0.543078	0	0		0	304.801	0	0		0	0.67605	0	0		0.00857629	0.819751	1.04621	4.79341e-07
	0	0.472657	0	0		0	402.634	0	0		0.0075591	0.636045	1.18846	6.20344e-06		0.00401194	0.42014	0.954907	0.0002962		0	236.328	0	0		0.00576302	1.60084	0.36	3.37245e-06		0.0104827	0.545689	1.921	1.88321e-05		5.35841	306.267	1.74959	13.4569		0	0.6793	0	0		0	0.823692	0	0
	0	0.474919	0	0		0	404.56	0	0		0	0.639088	0	0		0	0.42215	0	0		0	237.459	0	0		0.0038604	1.6085	0.24	3.51448e-06		0	0.5483	0	0		0	307.732	0	0		0.00328149	0.68255	0.480769	0.00033304		0.011545	0.827633	1.39494	1.72918e-08
	0.00754861	0.47718	1.58192	3.14478e-05		7.40992	406.487	1.82292	56.1497		0.00719536	0.642131	1.12054	9.38052e-06		0	0.42416	0	0		0	238.59	0	0		0.00517171	1.61616	0.32	6.74945e-06		0.00894335	0.55091	1.62338	1.10487e-05		0	309.197	0	0		0	0.685801	0	0		0	0.831574	0	0
	0	0.479442	0	0		0	408.413	0	0		0	0.645174	0	0		0	0.42617	0	0		0	239.721	0	0		0.00389717	1.62382	0.24	6.89151e-06		0	0.553521	0	0		6.70923	310.663	2.15965	22.2944		0.0022085	0.689051	0.320513	0.000211195		0.0109265	0.835516	1.30776	1.05824e-06
	0	0.481703	0	0		0	410.34	0	0		0.00792388	0.648218	1.22241	1.49915e-05		0.00613309	0.428181	1.43236	0.000404656		0	240.851	0	0		0.00456814	1.63148	0.28	1.05027e-05		0.0076739	0.556132	1.37987	6.00805e-06		0	312.128	0	0		0	0.692301	0	0		0	0.839457	0	0
	0.00218741	0.483965	0.451977	1.19275e-05		0	412.266	0	0		0	0.651261	0	0		0	0.430191	0	0		8.14527	241.982	3.36606	66.0072		0.00458959	1.63914	0.28	1.32941e-05		0	0.558743	0	0		6.51534	313.594	2.07764	25.539		0	0.695551	0	0		0.00882369	0.843398	1.04621	2.98025e-06
	0	0.486226	0	0		6.68748	414.193	1.61458	36.881		0	0.654304	0	0		0	0.432201	0	0		0	243.113	0	0		0.00329359	1.6468	0.2	1.17241e-05		0.00941666	0.561354	1.67749	4.10566e-06		0	315.059	0	0		0.00223975	0.698801	0.320513	0.000195455		0	0.847339	0	0
	0	0.488488	0	0		0	416.119	0	0		0.00937474	0.657348	1.42615	2.77985e-05		0.00391596	0.434211	0.901857	0.000236829		0	244.244	0	0		0.00463248	1.65446	0.28	1.98623e-05		0	0.563965	0	0		0	316.524	0	0		0	0.702052	0	0		0.0103905	0.85128	1.22057	7.48287e-06
	0	0.490749	0	0		0	418.046	0	0		0	0.660391	0	0		0	0.436221	0	0		0	245.375	0	0		0.00199454	1.66212	0.12	1.01312e-05		0.010424	0.566576	1.83983	1.99862e-06		6.60668	317.99	2.07764	32.3452		0.00452117	0.705302	0.641026	0.000370601		0	0.855221	0	0
	0.00557074	0.493011	1.12994	4.12453e-05		8.31195	419.972	1.97917	34.9362		0.00630769	0.663434	0.950764	2.39943e-05		0	0.438232	0	0		0	246.505	0	0		0.0106866	1.66978	0.64	6.34164e-05		0	0.569187	0	0		0	319.455	0	0		0	0.708552	0	0		0.014981	0.859162	1.74368	1.85792e-05
	0	0.495272	0	0		0	421.899	0	0		0	0.666477	0	0		0	0.440242	0	0		0	247.636	0	0		0.00335487	1.67744	0.2	2.2985e-05		0.00990127	0.571798	1.7316	4.68351e-07		0	320.921	0	0		0	0.711802	0	0		0	0.863103	0	0
	0	0.497534	0	0		0	423.825	0	0		0.00522885	0.669521	0.780985	2.47749e-05		0.00375386	0.442252	0.848806	0.000201326		0	248.767	0	0		0.0101106	1.6851	0.6	7.91597e-05		0	0.574409	0	0		5.19977	322.386	1.6129	31.0171		0.00343775	0.715053	0.480769	0.000255864		0.0181422	0.867044	2.09241	3.43623e-05
	0.0056474	0.499795	1.12994	5.10287e-05		0	425.752	0	0		0	0.672564	0	0		0	0.444262	0	0		8.06121	249.898	3.22581	42.6642		0.00541682	1.69276	0.32	4.80373e-05		0.0101478	0.57702	1.75866	7.90389e-12		0	323.851	0	0		0	0.718303	0	0		0	0.870986	0	0
	0	0.502057	0	0		7.57346	427.678	1.77083	20.8438		0	0.675607	0	0		0	0.446273	0	0		0	251.028	0	0		0.00340083	1.70041	0.2	3.38942e-05		0	0.579631	0	0		0	325.317	0	0		0.00925068	0.721553	1.28205	0.000644394		0.00762796	0.874927	0.87184	2.0429e-05
	0	0.504318	0	0		0	429.604	0	0		0.00576104	0.678651	0.848896	3.63672e-05		0	0.448283	0	0		0	252.159	0	0		0.0068323	1.70807	0.4	7.60006e-05		0.0108698	0.582242	1.86688	5.13208e-07		4.82401	326.782	1.47622	34.3657		0	0.724803	0	0		0	0.878868	0	0
	0.00629647	0.50658	1.24294	6.80377e-05		0	431.531	0	0		0	0.681694	0	0		0.00453877	0.450293	1.00796	0.000214761		0	253.29	0	0		0.000686293	1.71573	0.04	8.46811e-06		0	0.584853	0	0		0	328.248	0	0		0	0.728054	0	0		0.0107753	0.882809	1.22057	3.86732e-05
	0	0.508841	0	0		0	433.457	0	0		0.00534769	0.684737	0.780985	3.99698e-05		0	0.452303	0	0		0	254.421	0	0		0.00689357	1.72339	0.4	9.3832e-05		0.011603	0.587464	1.97511	2.16306e-06		6.2193	329.713	1.88628	49.4085		0.00703177	0.731304	0.961538	0.00044217		0	0.88675	0	0
	0	0.511103	0	0		9.52402	435.384	2.1875	15.4807		0	0.68778	0	0		0	0.454314	0	0		0	255.551	0	0		0.00276968	1.73105	0.16	4.13804e-05		0.0111757	0.590075	1.89394	3.23824e-06		0	331.178	0	0		0	0.734554	0	0		0.0108716	0.890691	1.22057	5.02625e-05
	0.00406051	0.513364	0.79096	5.16014e-05		0	437.31	0	0		0.00422235	0.690824	0.611205	3.68298e-05		0.00435747	0.456324	0.954907	0.000186993		10.2601	256.682	3.9972	34.9813		0.00834582	1.73871	0.48	0.000136249		0	0.592686	0	0		0	332.644	0	0		0.00472952	0.737804	0.641026	0.00027718		0	0.894632	0	0
	0	0.515626	0	0		0	439.237	0	0		0	0.693867	0	0		0	0.458334	0	0		0	257.813	0	0		0.00349274	1.74637	0.2	6.20492e-05		0.00869752	0.595297	1.46104	4.89175e-06		6.30222	334.109	1.88628	58.2609		0	0.741055	0	0		0.0101844	0.898573	1.13339	5.88421e-05
	0	0.517887	0	0		0	441.163	0	0		0	0.69691	0	0		0	0.460344	0	0		0	258.944	0	0		0.00631451	1.75403	0.36	0.000121614		0	0.597908	0	0		0	335.574	0	0		0	0.744305	0	0		0	0.902515	0	0
	0.00352643	0.520149	0.677966	5.19723e-05		6.00018	443.09	1.35417	4.83545		0.00404048	0.699953	0.57725	4.34469e-05		0	0.462355	0	0		0	260.074	0	0		0.00211403	1.76169	0.12	4.3987e-05		0.0103986	0.600519	1.7316	9.57889e-06		0	337.04	0	0		0.001198	0.747555	0.160256	6.29486e-05		0.0102737	0.906456	1.13339	7.24204e-05
	0	0.52241	0	0		0	445.016	0	0		0	0.702997	0	0		0.00763677	0.464365	1.64456	0.000286098		0	261.205	0	0		0.00070774	1.76935	0.04	1.5859e-05		0	0.603129	0	0		5.73738	338.505	1.69491	60.9601		0	0.750805	0	0		0	0.910397	0	0
	0	0.524672	0	0		0	446.943	0	0		0.00431536	0.70604	0.611205	5.26839e-05		0	0.466375	0	0		0	262.336	0	0		0.00142161	1.77701	0.08	3.42051e-05		0.0116362	0.60574	1.921	1.5869e-05		0	339.971	0	0		0.00241684	0.754055	0.320513	0.000117774		0.00876872	0.914338	0.959024	7.39597e-05
	0.00595405	0.526933	1.12994	0.000100565		5.61087	448.869	1.25	2.15074		0	0.709083	0	0		0	0.468385	0	0		12.1941	263.467	4.62833	24.0564		0.00571094	1.78467	0.32	0.000147145		0	0.608351	0	0		0	341.436	0	0		0	0.757306	0	0		0	0.918279	0	0
	0	0.529195	0	0		0	450.796	0	0		0.00483617	0.712127	0.679117	6.64645e-05		0.00648821	0.470396	1.37931	0.000218512		0	264.598	0	0		0.00286773	1.79233	0.16	7.89226e-05		0.0112407	0.610962	1.83983	2.12229e-05		6.18685	342.901	1.80427	74.7556		0	0.760556	0	0		0.0136685	0.92222	1.48213	0.000135741
	0	0.531456	0	0		0	452.722	0	0		0	0.71517	0	0		0	0.472406	0	0		0	265.728	0	0		0.00359998	1.79999	0.2	0.000105575		0	0.613573	0	0		0	344.367	0	0		0.00489619	0.763806	0.641026	0.000212194		0	0.926161	0	0
	0	0.533718	0	0		0	454.649	0	0		0	0.718213	0	0		0	0.474416	0	0		0	266.859	0	0		0.00723059	1.80765	0.4	0.000225462		0.0110033	0.616184	1.78571	2.74196e-05		5.76702	345.832	1.66758	75.5273		0	0.767057	0	0		0.0105417	0.930102	1.13339	0.000121605
	0.00181688	0.53598	0.338983	3.62326e-05		5.23159	456.575	1.14583	0.335516		0.00391854	0.721256	0.543294	6.34385e-05		0	0.476426	0	0		0	267.99	0	0		0.00290449	1.81531	0.16	9.60981e-05		0	0.618795	0	0		0	347.298	0	0		0.00617233	0.770307	0.801282	0.000246628		0	0.934043	0	0
	0	0.538241	0	0		0	458.502	0	0		0	0.7243	0	0		0.0060915	0.478436	1.27321	0.000176754		0	269.12	0	0		0.00583349	1.82297	0.32	0.000204398		0.0127778	0.621406	2.05628	4.055e-05		0	348.763	0	0		0	0.773557	0	0		0.010631	0.937984	1.13339	0.000140816
	0	0.540503	0	0		0	460.428	0	0		0.00419858	0.727343	0.57725	7.52104e-05		0	0.480447	0	0		0	270.251	0	0		0.00366125	1.83063	0.2	0.000135609		0	0.624017	0	0		5.74458	350.228	1.64024	84.3115		0.011204	0.776807	1.44231	0.000411643		0	0.941926	0	0
	0.00429305	0.542764	0.79096	9.6003e-05		0	462.355	0	0		0	0.730386	0	0		0	0.482457	0	0		8.37364	271.382	3.08555	6.83467		0.00147063	1.83829	0.08	5.74819e-05		0.00949437	0.626628	1.51515	3.73192e-05		0	351.694	0	0		0	0.780057	0	0		0.0156682	0.945867	1.6565	0.000235945
	0	0.545026	0	0		5.80351	464.281	1.25	0.0658244		0.00348659	0.733429	0.475382	6.87195e-05		0.00642529	0.484467	1.32626	0.000165754		0	272.513	0	0		0.00516865	1.84594	0.28	0.000212848		0	0.629239	0	0		0	353.159	0	0		0	0.783308	0	0		0	0.949808	0	0
	0	0.547287	0	0		0	466.207	0	0		0	0.736473	0	0		0	0.486477	0	0		0	273.644	0	0		0.00370721	1.8536	0.2	0.000160599		0.00888966	0.63185	1.40693	4.23294e-05		4.65335	354.625	1.31219	75.9745		0.00378153	0.786558	0.480769	0.000121832		0.0108097	0.953749	1.13339	0.000183464
	0.00683055	0.549549	1.24294	0.000170015		0	468.134	0	0		0	0.739516	0	0		0	0.488488	0	0		0	274.774	0	0		0.00148901	1.86126	0.08	6.77593e-05		0	0.634461	0	0		0	356.09	0	0		0	0.789808	0	0		0	0.95769	0	0
	0	0.55181	0	0		5.87576	470.06	1.25	0.814882		0.00277357	0.742559	0.373514	6.25054e-05		0	0.490498	0	0		0	275.905	0	0		0.00224271	1.86892	0.12	0.00010706		0.00879076	0.637072	1.37987	4.97964e-05		0	357.555	0	0		0.00635464	0.793058	0.801282	0.000186809		0.00670711	0.961631	0.697472	0.000127324
	0	0.554072	0	0		0	471.987	0	0		0	0.745603	0	0		0.00731577	0.492508	1.48541	0.000159899		0	277.036	0	0		0.00375317	1.87658	0.2	0.000187701		0	0.639683	0	0		4.71104	359.021	1.31219	85.007		0	0.796309	0	0		0	0.965572	0	0
	0.000628625	0.556333	0.112994	1.73011e-05		0	473.913	0	0		0.00203367	0.748646	0.271647	4.98368e-05		0	0.494518	0	0		11.3139	278.167	4.06732	2.66755		0.00226109	1.88424	0.12	0.000118323		0.0107744	0.642294	1.67749	7.15187e-05		0	360.486	0	0		0	0.799559	0	0		0.00760734	0.969513	0.784656	0.000160439
	0	0.558595	0	0		0	475.84	0	0		0	0.751689	0	0		0	0.496529	0	0		0	279.297	0	0		0.00151352	1.8919	0.08	8.27768e-05		0	0.644905	0	0		4.15581	361.951	1.14817	79.8964		0.0128655	0.802809	1.60256	0.000327422		0	0.973455	0	0
	0	0.560856	0	0		9.20696	477.766	1.92708	4.79864		0.00179393	0.754732	0.237691	4.76143e-05		0.00793431	0.498539	1.59151	0.000151983		0	280.428	0	0		0.000759825	1.89956	0.04	4.3383e-05		0.00858449	0.647516	1.32576	6.59251e-05		0	363.417	0	0		0	0.806059	0	0		0.0110777	0.977396	1.13339	0.000257999
	0.00318146	0.563118	0.564972	9.62515e-05		0	479.693	0	0		0	0.757776	0	0		0	0.500549	0	0		0	281.559	0	0		0.00152578	1.90722	0.08	9.08488e-05		0	0.650127	0	0		0	364.882	0	0		0.00778182	0.80931	0.961538	0.000178991		0	0.981337	0	0
	0	0.565379	0	0		0	481.619	0	0		0	0.760819	0	0		0	0.502559	0	0		0	282.69	0	0		0.00306381	1.91488	0.16	0.000190052		0.00883033	0.652738	1.35281	7.76024e-05		3.60539	366.348	0.984144	75.8911		0	0.81256	0	0		0.0137441	0.985278	1.39494	0.000351582
	0	0.567641	0	0		0	483.546	0	0		0.00337189	0.763862	0.441426	0.000100203		0	0.50457	0	0		0	283.82	0	0		0.000769016	1.92254	0.04	4.96481e-05		0	0.655349	0	0		0	367.813	0	0		0	0.81581	0	0		0	0.989219	0	0
	0.00193187	0.569902	0.338983	6.39106e-05		4.29845	485.472	0.885417	4.88388		0	0.766905	0	0		0.00725605	0.50658	1.43236	0.000115201		13.1885	284.951	4.62833	0.0799073		0.00231624	1.9302	0.12	0.000155492		0.009257	0.657959	1.40693	9.22186e-05		0	369.278	0	0		0.0118134	0.81906	1.44231	0.000231482		0.0034635	0.99316	0.348736	9.68401e-05
	0	0.572164	0	0		0	487.399	0	0		0.00261443	0.769949	0.339559	8.34324e-05		0	0.50859	0	0		0	286.082	0	0		0.000775144	1.93786	0.04	5.40596e-05		0	0.66057	0	0		3.04054	370.744	0.82012	69.7332		0	0.822311	0	0		0	0.997101	0	0
	0	0.574425	0	0		0	489.325	0	0		0	0.772992	0	0		0	0.5106	0	0		0	287.213	0	0		0	1.94552	0	0		0.0104071	0.663181	1.56926	0.000116556		0	372.209	0	0		0.0171992	0.825561	2.08333	0.00030093		0.00872748	1.00104	0.87184	0.000265544
	0.00260649	0.576687	0.451977	9.38433e-05		0	491.252	0	0		0.00131755	0.776035	0.169779	4.50188e-05		0	0.51261	0	0		0	288.343	0	0		0	1.95318	0	0		0	0.665792	0	0		3.47319	373.675	0.92947	84.1346		0	0.828811	0	0		0	1.00498	0	0
	0	0.578948	0	0		3.85295	493.178	0.78125	7.60104		0	0.779079	0	0		0.00819025	0.514621	1.59151	0.000106076		0	289.474	0	0		0.00235301	1.96084	0.12	0.000183087		0.00813802	0.668403	1.21753	0.000101722		0	375.14	0	0		0	0.832061	0	0		0	1.00893	0	0
	0	0.58121	0	0		0	495.105	0	0		0	0.782122	0	0		0	0.516631	0	0		0	290.605	0	0		0.0015748	1.9685	0.08	0.000126892		0.00726206	0.671014	1.08225	9.5659e-05		0	376.605	0	0		0.0107091	0.835311	1.28205	0.000156358		0.00971362	1.01287	0.959024	0.000333019
	0	0.583471	0	0		0	497.031	0	0		0.00373253	0.785165	0.475382	0.000140584		0	0.518641	0	0		0	291.736	0	0		0.00237139	1.97616	0.12	0.000197729		0	0.673625	0	0		2.89393	378.071	0.765446	75.8384		0	0.838562	0	0		0	1.01681	0	0
	0.00198554	0.585733	0.338983	7.9497e-05		3.37836	498.958	0.677083	9.25493		0	0.788208	0	0		0.00745761	0.520652	1.43236	8.1885e-05		15.1978	292.866	5.18934	2.2614		0.000793527	1.98382	0.04	6.84207e-05		0.00878228	0.676236	1.2987	0.000127897		0	379.536	0	0		0.0161887	0.841812	1.92308	0.000207739		0.00978921	1.02075	0.959024	0.000361787
	0	0.587994	0	0		0	500.884	0	0		0.00214941	0.791252	0.271647	8.61207e-05		0	0.522662	0	0		0	293.997	0	0		0.00238977	1.99148	0.12	0.000212935		0	0.678847	0	0		0	381.002	0	0		0	0.845062	0	0		0	1.02469	0	0
	0	0.590256	0	0		0	502.811	0	0		0	0.794295	0	0		0	0.524672	0	0		0	295.128	0	0		0	1.99914	0	0		0.00460943	0.681458	0.676407	7.38077e-05		2.92758	382.467	0.765446	82.6851		0	0.848313	0	0		0.0098648	1.02863	0.959024	0.000391746
	0.000669511	0.592517	0.112994	2.8899e-05		0	504.737	0	0		0	0.797338	0	0		0	0.526682	0	0		0	296.259	0	0		0.00160544	2.00679	0.08	0.000152469		0	0.684069	0	0		0	383.932	0	0		0.00955279	0.851563	1.1218	9.95103e-05		0	1.03257	0	0
	0	0.594779	0	0		7.12496	506.664	1.40625	28.0696		0.00190243	0.800381	0.237691	8.32815e-05		0.010658	0.528692	2.01592	9.20367e-05		0	297.389	0	0		0	2.01445	0	0		0.0055737	0.68668	0.811688	9.76456e-05		0	385.398	0	0		0	0.854813	0	0		0.00903672	1.03651	0.87184	0.000384452
	0	0.59704	0	0		0	508.59	0	0		0	0.803425	0	0		0	0.530703	0	0		0	298.52	0	0		0.000808846	2.02211	0.04	8.16786e-05		0	0.689291	0	0		2.53819	386.863	0.656096	76.9954		0.013751	0.858063	1.60256	0.000123212		0	1.04045	0	0
	0.00270871	0.599302	0.451977	0.000125612		0	510.517	0	0		0.00082153	0.806468	0.101868	3.8051e-05		0	0.532713	0	0		11.7675	299.651	3.92707	7.03666		0	2.02977	0	0		0.0063649	0.691902	0.919913	0.000121453		0	388.329	0	0		0	0.861313	0	0		0.010016	1.04439	0.959024	0.000455244
	0	0.601564	0	0		0	512.443	0	0		0	0.809511	0	0		0.00765917	0.534723	1.43236	5.42421e-05		0	300.782	0	0		0.000814973	2.03743	0.04	8.73104e-05		0	0.694513	0	0		1.81151	389.794	0.464735	57.5293		0	0.864564	0	0		0	1.04834	0	0
	0	0.603825	0	0		5.89381	514.369	1.14583	31.4415		0.00248319	0.812555	0.305603	0.000121456		0	0.536733	0	0		0	301.913	0	0		0.00163607	2.04509	0.08	0.000180394		0.00641293	0.697124	0.919913	0.000132743		0	391.259	0	0		0.0236424	0.867814	2.72436	0.000165465		0.00642192	1.05228	0.610288	0.000311041
	0.00205453	0.606086	0.338983	0.000102033		0	516.296	0	0		0	0.815598	0	0		0	0.538744	0	0		0	303.043	0	0		0.0016422	2.05275	0.08	0.00018626		0	0.699735	0	0		0	392.725	0	0		0	0.871064	0	0		0	1.05622	0	0
	0	0.608348	0	0		0	518.222	0	0		0	0.818641	0	0		0	0.540754	0	0		0	304.174	0	0		0	2.06041	0	0		0.00817123	0.702346	1.16342	0.000182794		2.90955	394.19	0.738108	98.7331		0.0182149	0.874314	2.08333	0.000106304		0.00739431	1.06016	0.697472	0.00038073
	0	0.61061	0	0		6.23095	520.149	1.19792	40.5241		0.00055802	0.821684	0.0679117	2.95189e-05		0.0123814	0.542764	2.28117	6.52849e-05		0	305.305	0	0		0.00248169	2.06807	0.12	0.000297411		0	0.704957	0	0		0	395.655	0	0		0	0.877565	0	0		0	1.0641	0	0
	0.00277004	0.612871	0.451977	0.000146892		0	522.075	0	0		0	0.824728	0	0		0	0.544774	0	0		15.0424	306.435	4.90884	19.9714		0	2.07573	0	0		0.00536036	0.707568	0.757576	0.000129153		0	397.121	0	0		0	0.880815	0	0		0.00558696	1.06804	0.523104	0.000305139
	0	0.615133	0	0		0	524.002	0	0		0.00112431	0.827771	0.135823	6.25353e-05		0	0.546785	0	0		0	307.566	0	0		0	2.08339	0	0		0	0.710179	0	0		1.85237	398.586	0.464735	66.981		0.0141677	0.884065	1.60256	6.09715e-05		0	1.07198	0	0
	0	0.617394	0	0		0	525.928	0	0		0	0.830814	0	0		0.0110632	0.548795	2.01592	4.54192e-05		0	308.697	0	0		0.00083642	2.09105	0.04	0.0001085		0.00713561	0.712789	1.00108	0.00018459		0	400.052	0	0		0	0.887315	0	0		0.0056282	1.07592	0.523104	0.000325383
	0.00140035	0.619656	0.225989	7.90783e-05		2.74924	527.855	0.520833	22.5972		0.000566287	0.833858	0.0679117	3.30667e-05		0	0.550805	0	0		0	309.828	0	0		0.000839484	2.09871	0.04	0.000111715		0	0.7154	0	0		0	401.517	0	0		0.0142719	0.890566	1.60256	4.87974e-05		0	1.07987	0	0
	0	0.621917	0	0		0	529.781	0	0		0	0.836901	0	0		0	0.552815	0	0		0	310.959	0	0		0.0016851	2.10637	0.08	0.000229953		0.00427388	0.718011	0.595238	0.00011836		1.10165	402.982	0.273373	42.339		0	0.893816	0	0		0.00283472	1.08381	0.261552	0.000173137
	0	0.624179	0	0		0	531.708	0	0		0	0.839944	0	0		0	0.554825	0	0		0	312.089	0	0		0.000845611	2.11403	0.04	0.000118285		0	0.720622	0	0		0	404.448	0	0		0.0316273	0.897066	3.52564	8.35507e-05		0	1.08775	0	0
	0	0.62644	0	0		0	533.634	0	0		0.00171746	0.842987	0.203735	0.000107579		0.00974832	0.556836	1.75066	2.72114e-05		0	313.22	0	0		0.00254603	2.12169	0.12	0.000364923		0.00352224	0.723233	0.487013	0.000104145		0.998693	405.913	0.246036	39.921		0	0.900316	0	0		0.00190355	1.09169	0.174368	0.000122605
	0.00213119	0.628702	0.338983	0.000130367		6.13663	535.561	1.14583	62.0261		0	0.846031	0	0		0	0.558846	0	0		10.8017	314.351	3.43619	27.1049		0	2.12935	0	0		0	0.725844	0	0		0	407.379	0	0		0	0.903567	0	0		0	1.09563	0	0
	0	0.630963	0	0		0	537.487	0	0		0.00115324	0.849074	0.135823	7.55688e-05		0	0.560856	0	0		0	315.482	0	0		0	2.13701	0	0		0.00374476	0.728455	0.514069	0.000117922		0	408.844	0	0		0.018892	0.906817	2.08333	3.15739e-05		0.00383459	1.09957	0.348736	0.000260004
	0	0.633225	0	0		0	539.414	0	0		0	0.852117	0	0		0.0119441	0.562866	2.12202	2.36646e-05		0	316.612	0	0		0	2.14467	0	0		0	0.731066	0	0		1.90685	410.309	0.464735	80.701		0	0.910067	0	0		0	1.10351	0	0
	0.00215419	0.635486	0.338983	0.000139544		3.10143	541.34	0.572917	36.0767		0.00174226	0.85516	0.203735	0.000119279		0	0.564877	0	0		0	317.743	0	0		0.00086093	2.15233	0.04	0.000135533		0.00456563	0.733677	0.622294	0.000152761		0	411.775	0	0		0.029273	0.913317	3.20513	3.37075e-05		0.00868969	1.10745	0.784656	0.000619272
	0	0.637748	0	0		0	543.267	0	0		0	0.858204	0	0		0	0.566887	0	0		0	318.874	0	0		0.00259198	2.15998	0.12	0.000417369		0	0.736288	0	0		0	413.24	0	0		0	0.916567	0	0		0	1.11139	0	0
	0	0.640009	0	0		0	545.193	0	0		0	0.861247	0	0		0	0.568897	0	0		0	320.005	0	0		0.000867058	2.16764	0.04	0.00014276		0.00499796	0.738899	0.676407	0.000177297		1.36043	414.705	0.328048	60.8297		0	0.919818	0	0		0.00583435	1.11533	0.523104	0.000436339
	0.00145146	0.642271	0.225989	9.93548e-05		0	547.12	0	0		0.00117391	0.86429	0.135823	8.56332e-05		0.0127205	0.570907	2.22812	1.43224e-05		11.7104	321.135	3.64656	44.3401		0.000870122	2.1753	0.04	0.000146445		0	0.74151	0	0		0	416.171	0	0		0.0147928	0.923068	1.60256	8.24238e-06		0	1.11928	0	0
	0	0.644532	0	0		3.7175	549.046	0.677083	51.3188		0	0.867334	0	0		0	0.572918	0	0		0	322.266	0	0		0.000873186	2.18296	0.04	0.000150176		0.00442929	0.744121	0.595238	0.000166249		0	417.636	0	0		0	0.926318	0	0		0.00391706	1.12322	0.348736	0.000306989
	0	0.646794	0	0		0	550.972	0	0		0.000886632	0.870377	0.101868	6.73763e-05		0	0.574928	0	0		0	323.397	0	0		0.00087625	2.19062	0.04	0.000153954		0.00262649	0.746732	0.351732	0.000101331		1.03114	419.102	0.246036	48.6155		0.0163866	0.929569	1.76282	4.61392e-06		0	1.12716	0	0
	0.00220019	0.649055	0.338983	0.000158833		0	552.899	0	0		0	0.87342	0	0		0.0122427	0.576938	2.12202	7.923e-06		0	324.528	0	0		0.000879313	2.19828	0.04	0.000157779		0	0.749343	0	0		0	420.567	0	0		0	0.932819	0	0		0.00394455	1.1311	0.348736	0.000323516
	0	0.651317	0	0		0	554.826	0	0		0.00178566	0.876463	0.203735	0.000141206		0	0.578948	0	0		0	325.658	0	0		0.00176475	2.20594	0.08	0.000323302		0.00244141	0.751954	0.324675	9.93805e-05		0.692235	422.033	0.164024	33.7759		0	0.936069	0	0		0	1.13504	0	0
	0	0.653578	0	0		7.82932	556.752	1.40625	126.288		0	0.879507	0	0		0	0.580959	0	0		0	326.789	0	0		0	2.2136	0	0		0	0.754565	0	0		0	423.498	0	0		0.0180638	0.939319	1.92308	7.94481e-07		0.00397203	1.13898	0.348736	0.000340477
	0.00148212	0.65584	0.225989	0.00011263		0	558.678	0	0		0	0.88255	0	0		0	0.582969	0	0		10.3481	327.92	3.15568	54.755		0.00177701	2.22126	0.08	0.000339071		0.00266323	0.757176	0.351732	0.000114185		0	424.963	0	0		0	0.942569	0	0		0	1.14292	0	0
	0	0.658101	0	0		0	560.605	0	0		0.000902133	0.885593	0.101868	7.5585e-05		0.0145857	0.584979	2.49337	3.17355e-06		0	329.051	0	0		0	2.22892	0	0		0	0.759787	0	0		0.81602	426.429	0.191361	41.8566		0.0257675	0.94582	2.72436	1.44697e-10		0.00399953	1.14686	0.348736	0.000357874
	0	0.660363	0	0		0	562.531	0	0		0	0.888637	0	0		0	0.586989	0	0		0	330.181	0	0		0.000894632	2.23658	0.04	0.000177608		0.00185649	0.762397	0.243506	8.36997e-05		0	427.894	0	0		0	0.94907	0	0		0	1.15081	0	0
	0.00149746	0.662624	0.225989	0.00011958		4.9978	564.458	0.885417	92.9725		0.00121111	0.89168	0.135823	0.000105334		0	0.589	0	0		0	331.312	0	0		0	2.24424	0	0		0	0.765008	0	0		0	429.359	0	0		0	0.95232	0	0		0.00503377	1.15475	0.43592	0.000469626
	0	0.664886	0	0		0	566.384	0	0		0	0.894723	0	0		0	0.59101	0	0		0	332.443	0	0		0	2.2519	0	0		0.00290765	0.767619	0.378788	0.000137637		1.05998	430.825	0.246036	57.0625		0.0245018	0.95557	2.5641	2.47448e-06		0	1.15869	0	0
	0	0.667148	0	0		0	568.311	0	0		0.00182907	0.897766	0.203735	0.000164983		0.0163592	0.59302	2.75862	2.89735e-07		0	333.574	0	0		0.000903824	2.25956	0.04	0.000190068		0	0.77023	0	0		0	432.29	0	0		0	0.958821	0	0		0.00304088	1.16263	0.261552	0.000295471
	0	0.669409	0	0		4.45498	570.237	0.78125	91.549		0	0.90081	0	0		0	0.59503	0	0		0	334.704	0	0		0.000906888	2.26722	0.04	0.000194316		0.00439114	0.772841	0.568182	0.000217922		0	433.756	0	0		0.0231267	0.962071	2.40385	6.40574e-06		0	1.16657	0	0
	0.00075895	0.67167	0.112994	6.4585e-05		0	572.164	0	0		0	0.903853	0	0		0	0.59704	0	0		10.5979	335.835	3.15568	77.5417		0.00272985	2.27488	0.12	0.00059583		0	0.775452	0	0		0.594889	435.221	0.136687	33.5581		0	0.965321	0	0		0.00204099	1.17051	0.174368	0.000206328
	0	0.673932	0	0		0	574.09	0	0		0.00123178	0.906896	0.135823	0.00011716		0.0136653	0.599051	2.28117	1.7754e-07		0	336.966	0	0		0	2.28254	0	0		0.0042103	0.778063	0.541126	0.00021876		0	436.686	0	0		0	0.968571	0	0		0	1.17445	0	0
	0	0.676194	0	0		0	576.017	0	0		0	0.909939	0	0		0	0.601061	0	0		0	338.097	0	0		0	2.2902	0	0		0	0.780674	0	0		0.958232	438.152	0.218699	55.7202		0.0233611	0.971822	2.40385	1.63437e-05		0.00205474	1.17839	0.174368	0.000215892
	0	0.678455	0	0		7.5253	577.943	1.30208	175.078		0.00155006	0.912983	0.169779	0.000152582		0	0.603071	0	0		0	339.228	0	0		0.000919143	2.29786	0.04	0.000211775		0.00402663	0.783285	0.514069	0.000218757		0	439.617	0	0		0	0.975072	0	0		0	1.18233	0	0
	0	0.680717	0	0		0	579.87	0	0		0	0.916026	0	0		0	0.605081	0	0		0	340.358	0	0		0.00184441	2.30552	0.08	0.000432514		0	0.785896	0	0		0	441.083	0	0		0.026653	0.978322	2.72436	2.89097e-05		0.00723968	1.18627	0.610288	0.000789852
	0	0.682978	0	0		0	581.796	0	0		0.000624156	0.919069	0.0679117	6.35364e-05		0.0135267	0.607092	2.22812	2.61366e-06		0	341.489	0	0		0.00092527	2.31318	0.04	0.000220786		0.00256009	0.788507	0.324675	0.000145246		0.483923	442.548	0.109349	29.4159		0	0.981572	0	0		0	1.19022	0	0
	0.00154856	0.68524	0.225989	0.000144248		0	583.723	0	0		0	0.922113	0	0		0	0.609102	0	0		10.0912	342.62	2.9453	93.5386		0	2.32084	0	0		0	0.791118	0	0		0	444.013	0	0		0	0.984823	0	0		0.00208223	1.19416	0.174368	0.00023567
	0	0.687501	0	0		5.49046	585.649	0.9375	143.367		0	0.925156	0	0		0	0.611112	0	0		0	343.751	0	0		0	2.3285	0	0		0.0027918	0.793729	0.351732	0.000165215		0	445.479	0	0		0.0348359	0.988073	3.52564	6.31617e-05		0	1.1981	0	0
	0	0.689763	0	0		0	587.576	0	0		0.000945534	0.928199	0.101868	0.000101079		0.0130106	0.613122	2.12202	6.03309e-06		0	344.881	0	0		0	2.33616	0	0		0	0.79634	0	0		0.733096	446.944	0.164024	46.5209		0	0.991323	0	0		0.00209597	1.20204	0.174368	0.000245884
	0.0015639	0.692024	0.225989	0.0001521		0	589.502	0	0		0	0.931242	0	0		0	0.615133	0	0		0	346.012	0	0		0	2.34381	0	0		0.000864665	0.798951	0.108225	5.33145e-05		0	448.409	0	0		0.0302835	0.994573	3.04487	7.25905e-05		0	1.20598	0	0
	0	0.694286	0	0		6.77678	591.429	1.14583	191.988		0.000634489	0.934286	0.0679117	7.00152e-05		0	0.617143	0	0		0	347.143	0	0		0	2.35147	0	0		0	0.801562	0	0		0	449.875	0	0		0	0.997823	0	0		0.00421943	1.20992	0.348736	0.000512629
	0	0.696547	0	0		0	593.355	0	0		0	0.937329	0	0		0	0.619153	0	0		0	348.274	0	0		0.00188731	2.35913	0.08	0.000497891		0.00130548	0.804173	0.162338	8.37792e-05		0.123384	451.34	0.0273373	8.16356		0	1.00107	0	0		0	1.21386	0	0
	0	0.698809	0	0		0	595.282	0	0		0.00159656	0.940372	0.169779	0.000181737		0.0141698	0.621163	2.28117	1.41462e-05		12.2512	349.404	3.50631	139.782		0	2.36679	0	0		0	0.806784	0	0		0	452.806	0	0		0.0337994	1.00432	3.36538	0.000115476		0.00318519	1.2178	0.261552	0.000400442
	0	0.70107	0	0		0	597.208	0	0		0	0.943415	0	0		0	0.623174	0	0		0	350.535	0	0		0	2.37445	0	0		0.000437984	0.809395	0.0541126	2.9225e-05		0.620928	454.271	0.136687	42.2141		0	1.00757	0	0		0	1.22175	0	0
	0	0.703332	0	0		5.92893	599.134	0.989583	186.137		0	0.946459	0	0		0	0.625184	0	0		0	351.666	0	0		0.000952845	2.38211	0.04	0.000263659		0	0.812006	0	0		0	455.736	0	0		0.0242987	1.01082	2.40385	0.000101804		0.0021372	1.22569	0.174368	0.000277826
	0.00159456	0.705593	0.225989	0.000168427		0	601.061	0	0		0.00193447	0.949502	0.203735	0.000230425		0.012311	0.627194	1.96287	1.87819e-05		0	352.797	0	0		0.000955908	2.38977	0.04	0.000268657		0.00132243	0.814616	0.162338	9.16593e-05		0	457.202	0	0		0	1.01408	0	0		0	1.22963	0	0
	0	0.707855	0	0		0	602.987	0	0		0	0.952545	0	0		0	0.629204	0	0		0	353.927	0	0		0	2.39743	0	0		0	0.817227	0	0		0.250775	458.667	0.0546747	17.741		0	1.01733	0	0		0	1.23357	0	0
	0	0.710116	0	0		0	604.914	0	0		0.000648957	0.955589	0.0679117	7.96139e-05		0	0.631215	0	0		0	355.058	0	0		0	2.40509	0	0		0.00243999	0.819838	0.297619	0.000175509		0	460.133	0	0		0.0179909	1.02058	1.76282	9.87051e-05		0.00431564	1.23751	0.348736	0.000589056
	0.000804947	0.712378	0.112994	8.84511e-05		7.90157	606.84	1.30208	273.212		0	0.958632	0	0		0	0.633225	0	0		7.99302	356.189	2.24404	109.719		0.0009651	2.41275	0.04	0.000283934		0	0.822449	0	0		0	461.598	0	0		0	1.02382	0	0		0	1.24145	0	0
	0	0.714639	0	0		0	608.767	0	0		0.00228582	0.961675	0.237691	0.000288643		0.0131428	0.635235	2.06896	3.14271e-05		0	357.32	0	0		0.000968164	2.42041	0.04	0.00028912		0.000446461	0.82506	0.0541126	3.32979e-05		0.126589	463.063	0.0273373	9.30875		0.0181055	1.02708	1.76282	0.000116601		0.00325734	1.24539	0.261552	0.0004589
	0	0.716901	0	0		0	610.693	0	0		0	0.964718	0	0		0	0.637245	0	0		0	358.45	0	0		0.000971228	2.42807	0.04	0.000294353		0.000895748	0.827671	0.108225	6.8005e-05		0	464.529	0	0		0	1.03033	0	0		0	1.24933	0	0
	0	0.719162	0	0		5.74331	612.62	0.9375	212.723		0	0.967762	0	0		0	0.639255	0	0		0	359.581	0	0		0	2.43573	0	0		0	0.830282	0	0		0	465.994	0	0		0.0149073	1.03358	1.44231	0.000111259		0.00218531	1.25327	0.174368	0.000317556
	0	0.721424	0	0		0	614.546	0	0		0.00230752	0.970805	0.237691	0.000303966		0.013948	0.641266	2.17507	4.40544e-05		0	360.712	0	0		0	2.44339	0	0		0.00067605	0.832893	0.0811688	5.31509e-05		0.383373	467.46	0.082012	29.2727		0	1.03683	0	0		0	1.25721	0	0
	0	0.723685	0	0		0	616.473	0	0		0	0.973848	0	0		0	0.643276	0	0		0	361.843	0	0		0	2.45105	0	0		0	0.835504	0	0		0	468.925	0	0		0	1.04008	0	0		0.0043981	1.26116	0.348736	0.000658791
	0	0.725947	0	0		0	618.399	0	0		0.00199027	0.976892	0.203735	0.000269487		0	0.645286	0	0		0	362.974	0	0		0	2.45871	0	0		0.00113381	0.838115	0.135281	9.22372e-05		0.128592	470.39	0.0273373	10.0626		0.015048	1.04333	1.44231	0.000137335		0	1.2651	0	0
	0	0.728208	0	0		9.3695	620.326	1.51042	378.682		0	0.979935	0	0		0	0.647296	0	0		9.70264	364.104	2.6648	161.458		0	2.46637	0	0		0	0.840726	0	0		0	471.856	0	0		0	1.04658	0	0		0.0011064	1.26904	0.087184	0.000170726
	0	0.73047	0	0		0	622.252	0	0		0.000667557	0.982978	0.0679117	9.28607e-05		0.0106782	0.649307	1.64456	4.62754e-05		0	365.235	0	0		0	2.47403	0	0		0.00114088	0.843337	0.135281	9.59632e-05		0	473.321	0	0		0.0269186	1.04983	2.5641	0.000277762		0	1.27298	0	0
	0	0.732731	0	0		0	624.179	0	0		0	0.986021	0	0		0	0.651317	0	0		0	366.366	0	0		0.00297802	2.48169	0.12	0.000996896		0	0.845948	0	0		0.519176	474.786	0.109349	42.1163		0	1.05308	0	0		0.00111327	1.27692	0.087184	0.000176862
	0.000830501	0.734993	0.112994	0.000103328		0	626.105	0	0		0	0.989065	0	0		0	0.653327	0	0		0	367.497	0	0		0	2.48935	0	0		0.000918354	0.848559	0.108225	7.98104e-05		0	476.252	0	0		0	1.05633	0	0		0	1.28086	0	0
	0	0.737255	0	0		6.8691	628.032	1.09375	301.558		0.00101064	0.992108	0.101868	0.000146254		0.0114727	0.655337	1.75066	6.10987e-05		0	368.627	0	0		0.000998802	2.49701	0.04	0.000343563		0	0.85117	0	0		0	477.717	0	0		0.0152824	1.05958	1.44231	0.000186888		0.00112014	1.2848	0.087184	0.000183106
	0	0.739516	0	0		0	629.958	0	0		0	0.995151	0	0		0	0.657348	0	0		0	369.758	0	0		0	2.50466	0	0		0.000462003	0.853781	0.0541126	4.14547e-05		0.261992	479.183	0.0546747	22.0122		0	1.06283	0	0		0	1.28874	0	0
	0.000838167	0.741778	0.112994	0.000108017		0	631.885	0	0		0.00237262	0.998194	0.237691	0.000352311		0	0.659358	0	0		7.02244	370.889	1.89341	135.59		0	2.51232	0	0		0	0.856392	0	0		0	480.648	0	0		0.0153761	1.06608	1.44231	0.000208841		0.00338104	1.29269	0.261552	0.000568378
	0	0.744039	0	0		0	633.811	0	0		0	1.00124	0	0		0	0.661368	0	0		0	372.019	0	0		0	2.51998	0	0		0.000232414	0.859003	0.0270563	2.15168e-05		0	482.113	0	0		0	1.06933	0	0		0	1.29663	0	0
	0	0.746301	0	0		5.62893	635.737	0.885417	267.303		0	1.00428	0	0		0.00950197	0.663378	1.43236	6.45242e-05		0	373.15	0	0		0	2.52764	0	0		0	0.861614	0	0		0.264395	483.579	0.0546747	22.9873		0	1.07258	0	0		0.00226777	1.30057	0.174368	0.00039184
	0.00169167	0.748562	0.225989	0.000225618		0	637.664	0	0		0.000684091	1.00732	0.0679117	0.000105491		0	0.665389	0	0		0	374.281	0	0		0	2.5353	0	0		0.000467654	0.864224	0.0541126	4.46421e-05		0	485.044	0	0		0.020689	1.07583	1.92308	0.000325412		0	1.30451	0	0
	0	0.750824	0	0		0	639.59	0	0		0	1.01037	0	0		0	0.667399	0	0		0	375.412	0	0		0	2.54296	0	0		0	0.866835	0	0		0.132999	486.51	0.0273373	11.8246		0	1.07908	0	0		0.00114076	1.30845	0.087184	0.00020249
	0	0.753085	0	0		2.67299	641.517	0.416667	134.297		0.00309701	1.01341	0.305603	0.000489486		0	0.669409	0	0		0	376.543	0	0		0	2.55062	0	0		0.00047048	0.869446	0.0541126	4.62801e-05		0	487.975	0	0		0.013876	1.08233	1.28205	0.000239167		0	1.31239	0	0
	0.000853499	0.755347	0.112994	0.000117706		0	643.443	0	0		0	1.01645	0	0		0.0156724	0.671419	2.33422	0.000131855		4.23757	377.673	1.12202	93.75		0.00102331	2.55828	0.04	0.000390496		0	0.872057	0	0		0	489.44	0	0		0	1.08558	0	0		0.00229526	1.31633	0.174368	0.000418334
	0	0.757608	0	0		0	645.37	0	0		0.00207707	1.0195	0.203735	0.000336324		0	0.67343	0	0		0	378.804	0	0		0	2.56594	0	0		0.000473305	0.874668	0.0541126	4.79476e-05		0.268401	490.906	0.0546747	24.6594		0	1.08883	0	0		0	1.32027	0	0
	0	0.75987	0	0		0	647.296	0	0		0	1.02254	0	0		0	0.67544	0	0		0	379.935	0	0		0.00102944	2.5736	0.04	0.000402698		0	0.877279	0	0		0	492.371	0	0		0.0175013	1.09208	1.60256	0.000343164		0.0011545	1.32421	0.087184	0.000215953
	0	0.762131	0	0		3.04323	649.223	0.46875	164.332		0	1.02558	0	0		0.012938	0.67745	1.90981	0.000125889		0	381.066	0	0		0	2.58126	0	0		0	0.87989	0	0		0	493.837	0	0		0	1.09533	0	0		0	1.32815	0	0
	0	0.764393	0	0		0	651.149	0	0		0.00209567	1.02863	0.203735	0.000351609		0	0.67946	0	0		0	382.196	0	0		0.00103557	2.58892	0.04	0.000415089		0	0.882501	0	0		0.135402	495.302	0.0273373	12.8455		0.00880273	1.09858	0.801282	0.000187166		0.00116137	1.3321	0.087184	0.000222848
	0	0.766654	0	0		0	653.076	0	0		0	1.03167	0	0		0	0.68147	0	0		0	383.327	0	0		0	2.59658	0	0		0.000478957	0.885112	0.0541126	5.13711e-05		0	496.767	0	0		0	1.10183	0	0		0	1.33604	0	0
	0	0.768916	0	0		0	655.002	0	0		0.00210808	1.03471	0.203735	0.000361988		0	0.683481	0	0		0	384.458	0	0		0.0010417	2.60424	0.04	0.000427667		0	0.887723	0	0		0	498.233	0	0		0	1.10508	0	0		0.00233649	1.33998	0.174368	0.000459702
	0.00174277	0.771177	0.225989	0.000259071		4.10581	656.929	0.625	237.516		0	1.03776	0	0		0.0120006	0.685491	1.75066	0.000139388		5.13757	385.589	1.3324	131.443		0	2.6119	0	0		0	0.890334	0	0		0.136604	499.698	0.0273373	13.3718		0.00355235	1.10833	0.320513	8.47243e-05		0	1.34392	0	0
	0	0.773439	0	0		0	658.855	0	0		0.00176706	1.0408	0.169779	0.000310431		0	0.687501	0	0		0	386.719	0	0		0	2.61956	0	0		0	0.892945	0	0		0	501.164	0	0		0	1.11158	0	0		0.00117512	1.34786	0.087184	0.000236962
	0	0.7757	0	0		0	660.782	0	0		0	1.04384	0	0		0	0.689511	0	0		0	387.85	0	0		0.00210177	2.62722	0.08	0.000893771		0.000726912	0.895556	0.0811688	8.2369e-05		0	502.629	0	0		0.00893295	1.11483	0.801282	0.000229085		0	1.3518	0	0
	0.00175811	0.777962	0.225989	0.000269557		4.48709	662.708	0.677083	272.792		0	1.04689	0	0		0.0146742	0.691522	2.12202	0.000192564		0	388.981	0	0		0	2.63488	0	0		0	0.898167	0	0		0	504.094	0	0		0	1.11808	0	0		0	1.35574	0	0
	0	0.780223	0	0		0	664.635	0	0		0.00142605	1.04993	0.135823	0.000259063		0	0.693532	0	0		0	390.112	0	0		0.00105701	2.64254	0.04	0.000459933		0.000731151	0.900778	0.0811688	8.50916e-05		0	505.56	0	0		0	1.12133	0	0		0	1.35968	0	0
	0	0.782485	0	0		0	666.561	0	0		0	1.05297	0	0		0	0.695542	0	0		0	391.242	0	0		0.00106008	2.6502	0.04	0.000466527		0	0.903389	0	0		0.138607	507.025	0.0273373	14.2724		0.00901108	1.12458	0.801282	0.000256269		0	1.36363	0	0
	0.000886719	0.784746	0.112994	0.000140126		0	668.488	0	0		0.00322722	1.05602	0.305603	0.000599253		0	0.697552	0	0		5.77829	392.373	1.47265	165.805		0.00106314	2.65786	0.04	0.000473169		0	0.906	0	0		0	508.49	0	0		0	1.12783	0	0		0	1.36757	0	0
	0	0.787008	0	0		3.49174	670.414	0.520833	226.261		0	1.05906	0	0		0.012247	0.699563	1.75066	0.000186817		0	393.504	0	0		0.00106621	2.66551	0.04	0.000479856		0.000245836	0.908611	0.0270563	2.97528e-05		0	509.956	0	0		0.00725053	1.13108	0.641026	0.000220189		0.0035872	1.37151	0.261552	0.000776837
	0	0.789269	0	0		0	672.341	0	0		0.00252452	1.0621	0.237691	0.000478985		0	0.701573	0	0		0	394.635	0	0		0	2.67317	0	0		0	0.911222	0	0		0.279618	511.421	0.0546747	29.6538		0	1.13433	0	0		0	1.37545	0	0
	0.000894386	0.791531	0.112994	0.000145577		0	674.267	0	0		0	1.06515	0	0		0	0.703583	0	0		0	395.765	0	0		0.00107233	2.68083	0.04	0.000493373		0.000988996	0.913833	0.108225	0.000122789		0	512.887	0	0		0	1.13758	0	0		0	1.37939	0	0
	0	0.793792	0	0		0	676.193	0	0		0	1.06819	0	0		0.009358	0.705593	1.32626	0.000158535		0	396.896	0	0		0	2.68849	0	0		0	0.916444	0	0		0	514.352	0	0		0.0109696	1.14083	0.961538	0.000365952		0	1.38333	0	0
	0	0.796054	0	0		4.23825	678.12	0.625	291.961		0.00218248	1.07123	0.203735	0.000427429		0	0.707604	0	0		0	398.027	0	0		0	2.69615	0	0		0.000994648	0.919054	0.108225	0.000126626		0	515.817	0	0		0	1.14408	0	0		0.00120948	1.38727	0.087184	0.000274143
	0	0.798315	0	0		0	680.047	0	0		0	1.07428	0	0		0	0.709614	0	0		3.9188	399.158	0.981767	125.124		0.00108152	2.70381	0.04	0.000514001		0	0.921665	0	0		0	517.283	0	0		0.00183868	1.14733	0.160256	6.51241e-05		0	1.39121	0	0
	0	0.800577	0	0		0	681.973	0	0		0.00182907	1.07732	0.169779	0.000365721		0	0.711624	0	0		0	400.288	0	0		0.00216918	2.71147	0.08	0.00104194		0.000250075	0.924276	0.0270563	3.26303e-05		0.141812	518.748	0.0273373	15.7745		0	1.15058	0	0		0	1.39515	0	0
	0	0.802839	0	0		2.84958	683.899	0.416667	205.189		0	1.08036	0	0		0.0079503	0.713634	1.11406	0.000153478		0	401.419	0	0		0.00108765	2.71913	0.04	0.000527987		0	0.926887	0	0		0	520.214	0	0		0.00369819	1.15383	0.320513	0.000138784		0	1.39909	0	0
	0.00181944	0.8051	0.225989	0.000313584		0	685.826	0	0		0.0018394	1.08341	0.169779	0.000375375		0	0.715645	0	0		0	402.55	0	0		0.00109072	2.72679	0.04	0.00053505		0.000251488	0.929498	0.0270563	3.3619e-05		0	521.679	0	0		0	1.15708	0	0		0.00122322	1.40304	0.087184	0.000289774
	0	0.807361	0	0		0	687.752	0	0		0	1.08645	0	0		0	0.717655	0	0		0	403.681	0	0		0	2.73445	0	0		0	0.932109	0	0		0	523.144	0	0		0	1.16033	0	0		0	1.40698	0	0
	0	0.809623	0	0		0	689.679	0	0		0	1.08949	0	0		0.0125989	0.719665	1.75066	0.0002666		0	404.812	0	0		0	2.74211	0	0		0	0.93472	0	0		0	524.61	0	0		0.00559416	1.16359	0.480769	0.000228144		0	1.41092	0	0
	0	0.811885	0	0		3.2419	691.605	0.46875	247.148		0.00408078	1.09254	0.373514	0.000858206		0	0.721675	0	0		0	405.942	0	0		0	2.74977	0	0		0	0.937331	0	0		0	526.075	0	0		0	1.16684	0	0		0	1.41486	0	0
	0.00091994	0.814146	0.112994	0.0001645		0	693.532	0	0		0	1.09558	0	0		0	0.723685	0	0		4.28197	407.073	1.05189	153.519		0	2.75743	0	0		0.00076294	0.939942	0.0811688	0.000106922		0.144216	527.541	0.0273373	16.9504		0.00375028	1.17009	0.320513	0.000161308		0	1.4188	0	0
	0	0.816408	0	0		0	695.458	0	0		0.00186523	1.09862	0.169779	0.000400064		0	0.725696	0	0		0	408.204	0	0		0	2.76509	0	0		0	0.942553	0	0		0	529.006	0	0		0	1.17334	0	0		0	1.42274	0	0
	0	0.818669	0	0		0	697.385	0	0		0	1.10167	0	0		0.0123536	0.727706	1.69761	0.00029331		0	409.335	0	0		0	2.77275	0	0		0.000255726	0.945164	0.0270563	3.66736e-05		0	530.471	0	0		0	1.17659	0	0		0	1.42668	0	0
	0.000927606	0.820931	0.112994	0.000170402		5.09914	699.311	0.729167	410.689		0.00262579	1.10471	0.237691	0.000574222		0	0.729716	0	0		0	410.465	0	0		0	2.78041	0	0		0	0.947775	0	0		0	531.937	0	0		0.0151261	1.17984	1.28205	0.000702542		0	1.43062	0	0
	0	0.823192	0	0		0	701.238	0	0		0	1.10775	0	0		0	0.731726	0	0		0	411.596	0	0		0	2.78807	0	0		0	0.950386	0	0		0	533.402	0	0		0	1.18309	0	0		0.00125071	1.43457	0.087184	0.000322335
	0	0.825454	0	0		0	703.164	0	0		0	1.1108	0	0		0	0.733737	0	0		0	412.727	0	0		0.00223658	2.79573	0.08	0.00120147		0	0.952997	0	0		0	534.867	0	0		0.00570354	1.18634	0.480769	0.000278287		0	1.43851	0	0
	0.000935272	0.827715	0.112994	0.000176408		0	705.091	0	0		0.00113464	1.11384	0.101868	0.000255323		0.00585475	0.735747	0.795756	0.000154825		2.612	413.858	0.631136	102.748		0.00112135	2.80339	0.04	0.000608267		0.000517104	0.955608	0.0541126	7.75675e-05		0	536.333	0	0		0	1.18959	0	0		0	1.44245	0	0
	0	0.829977	0	0		6.99652	707.017	0.989583	594.147		0	1.11688	0	0		0	0.737757	0	0		0	414.988	0	0		0.00112442	2.81105	0.04	0.000615846		0	0.958219	0	0		0	537.798	0	0		0	1.19284	0	0		0	1.44639	0	0
	0	0.832238	0	0		0	708.944	0	0		0.00266196	1.11993	0.237691	0.000610325		0	0.739767	0	0		0	416.119	0	0		0.00112748	2.8187	0.04	0.000623472		0.000259965	0.96083	0.0270563	3.9861e-05		0	539.264	0	0		0.00191681	1.19609	0.160256	0.000100434		0.00126445	1.45033	0.087184	0.000339266
	0.000942938	0.8345	0.112994	0.000182518		0	710.87	0	0		0	1.12297	0	0		0.00865735	0.741778	1.16711	0.000247137		0	417.25	0	0		0	2.82636	0	0		0	0.963441	0	0		0	540.729	0	0		0	1.19934	0	0		0	1.45427	0	0
	0	0.836761	0	0		4.08373	712.797	0.572917	360.398		0.00305878	1.12601	0.271647	0.000714373		0	0.743788	0	0		0	418.381	0	0		0.00113361	2.83402	0.04	0.000638867		0	0.966052	0	0		0	542.194	0	0		0.00192723	1.20259	0.160256	0.000105718		0	1.45821	0	0
	0	0.839023	0	0		0	714.723	0	0		0	1.12905	0	0		0	0.745798	0	0		0	419.511	0	0		0	2.84168	0	0		0	0.968663	0	0		0	543.66	0	0		0	1.20584	0	0		0	1.46215	0	0
	0.00285181	0.841284	0.338983	0.000566196		0	716.65	0	0		0	1.1321	0	0		0	0.747808	0	0		1.17992	420.642	0.280505	50.6513		0.00113974	2.84934	0.04	0.000654449		0.00026279	0.971274	0.0270563	4.20597e-05		0	545.125	0	0		0	1.20909	0	0		0	1.46609	0	0
	0	0.843546	0	0		0	718.576	0	0		0.00269813	1.13514	0.237691	0.000647531		0.00954676	0.749819	1.27321	0.000300222		0	421.773	0	0		0.0022856	2.857	0.08	0.00132462		0	0.973884	0	0		0	546.591	0	0		0.00194285	1.21234	0.160256	0.000113897		0.00256327	1.47003	0.174368	0.000722078
	0	0.845807	0	0		4.50314	720.503	0.625	417.691		0	1.13819	0	0		0	0.751829	0	0		0	422.904	0	0		0.00114586	2.86466	0.04	0.000670219		0.000264203	0.976495	0.0270563	4.31812e-05		0	548.056	0	0		0	1.21559	0	0		0	1.47398	0	0
	0.00095827	0.848069	0.112994	0.00019505		0	722.429	0	0		0.00193757	1.14123	0.169779	0.000473372		0	0.753839	0	0		0	424.034	0	0		0	2.87232	0	0		0	0.979106	0	0		0	549.521	0	0		0	1.21884	0	0		0	1.47792	0	0
	0	0.85033	0	0		0	724.356	0	0		0	1.14427	0	0		0.00601472	0.755849	0.795756	0.000202666		0	425.165	0	0		0.00115199	2.87998	0.04	0.000686176		0	0.981717	0	0		0.30125	550.987	0.0546747	40.5856		0	1.22209	0	0		0	1.48186	0	0
	0	0.852592	0	0		0	726.282	0	0		0.00389581	1.14732	0.339559	0.000968697		0	0.75786	0	0		0	426.296	0	0		0.00231011	2.88764	0.08	0.00138845		0.000266323	0.984328	0.0270563	4.4891e-05		0	552.452	0	0		0	1.22534	0	0		0	1.4858	0	0
	0	0.854853	0	0		3.79275	728.208	0.520833	369.136		0	1.15036	0	0		0	0.75987	0	0		0	427.427	0	0		0.00231624	2.8953	0.08	0.00140464		0	0.986939	0	0		0	553.918	0	0		0.00196889	1.22859	0.160256	0.000128206		0	1.48974	0	0
	0.00193698	0.857115	0.225989	0.000407273		0	730.135	0	0		0	1.1534	0	0		0	0.76188	0	0		2.40425	428.557	0.56101	113.588		0	2.90296	0	0		0	0.98955	0	0		0	555.383	0	0		0	1.23184	0	0		0	1.49368	0	0
	0	0.859376	0	0		0	732.061	0	0		0.00314145	1.15644	0.271647	0.000801678		0.00932068	0.76389	1.22016	0.00034286		0	429.688	0	0		0	2.91062	0	0		0	0.992161	0	0		0	556.848	0	0		0.00593794	1.23509	0.480769	0.000402501		0	1.49762	0	0
	0	0.861638	0	0		4.96971	733.988	0.677083	500.939		0	1.15949	0	0		0	0.7659	0	0		0	430.819	0	0		0.00233462	2.91828	0.08	0.00145378		0.000269148	0.994772	0.0270563	4.72226e-05		0	558.314	0	0		0	1.23834	0	0		0	1.50156	0	0
	0.00390463	0.863899	0.451977	0.000840789		0	735.914	0	0		0.00197374	1.16253	0.169779	0.000512338		0	0.767911	0	0		0	431.95	0	0		0	2.92594	0	0		0	0.997383	0	0		0	559.779	0	0		0	1.24159	0	0		0	1.50551	0	0
	0	0.866161	0	0		0	737.841	0	0		0	1.16558	0	0		0.00735203	0.769921	0.954907	0.000287979		0	433.08	0	0		0.00117344	2.9336	0.04	0.000743505		0	0.999994	0	0		0	561.245	0	0		0	1.24484	0	0		0	1.50945	0	0
	0	0.868422	0	0		0	739.767	0	0		0.000396814	1.16862	0.0339559	0.000104751		0	0.771931	0	0		0	434.211	0	0		0.0011765	2.94126	0.04	0.000751883		0	1.0026	0	0		0	562.71	0	0		0	1.24809	0	0		0	1.51339	0	0
	0.000983824	0.870684	0.112994	0.000216862		4.24929	741.694	0.572917	448.229		0	1.17166	0	0		0	0.773941	0	0		1.22116	435.342	0.280505	62.3392		0.00117957	2.94892	0.04	0.000760307		0	1.00522	0	0		0	564.175	0	0		0.00401071	1.25134	0.320513	0.000299322		0	1.51733	0	0
	0	0.872946	0	0		0	743.62	0	0		0	1.1747	0	0		0	0.775952	0	0		0	436.473	0	0		0.00118263	2.95658	0.04	0.000768779		0	1.00783	0	0		0	565.641	0	0		0	1.25459	0	0		0	1.52127	0	0
	0	0.875207	0	0		0	745.547	0	0		0.00319932	1.17775	0.271647	0.000865785		0.00453983	0.777962	0.583554	0.000192662		0	437.603	0	0		0.00118569	2.96424	0.04	0.000777298		0	1.01044	0	0		0	567.106	0	0		0	1.25784	0	0		0	1.52521	0	0
	0.00099149	0.877468	0.112994	0.000223631		0	747.473	0	0		0	1.18079	0	0		0	0.779972	0	0		0	438.734	0	0		0.00713255	2.97189	0.24	0.00471518		0	1.01305	0	0		0	568.572	0	0		0.00202098	1.26109	0.160256	0.000159364		0	1.52915	0	0
	0	0.87973	0	0		6.63531	749.4	0.885417	731.411		0.000803962	1.18383	0.0679117	0.000221138		0	0.781982	0	0		0	439.865	0	0		0.00357547	2.97955	0.12	0.00238343		0	1.01566	0	0		0	570.037	0	0		0	1.26434	0	0		0.00267322	1.53309	0.174368	0.000870521
	0	0.881992	0	0		0	751.326	0	0		0	1.18688	0	0		0.00582276	0.783993	0.742706	0.000261753		0	440.996	0	0		0.00477954	2.98721	0.16	0.00321254		0	1.01827	0	0		0	571.502	0	0		0	1.26759	0	0		0	1.53703	0	0
	0	0.884253	0	0		0	753.253	0	0		0.00161619	1.18992	0.135823	0.000451762		0	0.786003	0	0		1.24019	442.127	0.280505	68.1425		0.00359385	2.99487	0.12	0.00243552		0	1.02088	0	0		0	572.968	0	0		0	1.27084	0	0		0	1.54097	0	0
	0	0.886515	0	0		0	755.179	0	0		0	1.19296	0	0		0	0.788013	0	0		0	443.257	0	0		0.00240203	3.00253	0.08	0.00164119		0	1.02349	0	0		0	574.433	0	0		0	1.27409	0	0		0	1.54492	0	0
	0	0.888776	0	0		3.94326	757.106	0.520833	453.622		0	1.19601	0	0		0	0.790023	0	0		0	444.388	0	0		0.00481631	3.01019	0.16	0.00331758		0.000277625	1.0261	0.0270563	5.45711e-05		0	575.899	0	0		0.00204703	1.27734	0.160256	0.000176213		0	1.54886	0	0
	0.00201364	0.891038	0.225989	0.000474962		0	759.032	0	0		0.000407148	1.19905	0.0339559	0.000116545		0.00630265	0.792033	0.795756	0.000304989		0	445.519	0	0		0.00241428	3.01785	0.08	0.00167648		0	1.02871	0	0		0	577.364	0	0		0	1.28059	0	0		0	1.5528	0	0
	0	0.893299	0	0		0	760.959	0	0		0	1.20209	0	0		0	0.794044	0	0		0	446.65	0	0		0.00242041	3.02551	0.08	0.00169427		0	1.03133	0	0		0	578.829	0	0		0.00205744	1.28384	0.160256	0.00018319		0	1.55674	0	0
	0	0.895561	0	0		3.97336	762.885	0.520833	471.563		0.00204607	1.20514	0.169779	0.000594893		0	0.796054	0	0		0	447.78	0	0		0.00485307	3.03317	0.16	0.0034243		0	1.03394	0	0		0.158637	580.295	0.0273373	24.8934		0	1.2871	0	0		0	1.56068	0	0
	0.00304347	0.897822	0.338983	0.000733687		0	764.812	0	0		0	1.20818	0	0		0.00508051	0.798064	0.636605	0.000259254		1.57402	448.911	0.350631	92.755		0.00608166	3.04083	0.2	0.00432532		0	1.03655	0	0		0	581.76	0	0		0.00206786	1.29035	0.160256	0.000190301		0.0013641	1.56462	0.087184	0.000474972
	0	0.900084	0	0		0	766.738	0	0		0.00246769	1.21122	0.203735	0.000728629		0	0.800074	0	0		0	450.042	0	0		0.00487758	3.04849	0.16	0.00349639		0	1.03916	0	0		0	583.225	0	0		0	1.2936	0	0		0	1.56856	0	0
	0	0.902345	0	0		0	768.664	0	0		0	1.21427	0	0		0	0.802085	0	0		0	451.173	0	0		0.00855722	3.05615	0.28	0.00618226		0	1.04177	0	0		0	584.691	0	0		0	1.29685	0	0		0	1.5725	0	0
	0	0.904607	0	0		4.41484	770.591	0.572917	545.627		0	1.21731	0	0		0	0.804095	0	0		0	452.303	0	0		0.00612762	3.06381	0.2	0.00446154		0	1.04438	0	0		0	586.156	0	0		0	1.3001	0	0		0	1.57645	0	0
	0.00204942	0.906868	0.225989	0.000508331		0	772.517	0	0		0.00207191	1.22035	0.169779	0.000625872		0.00470406	0.806105	0.583554	0.000256966		0	453.434	0	0		0.00737153	3.07147	0.24	0.0054089		0	1.04699	0	0		0	587.622	0	0		0	1.30335	0	0		0	1.58039	0	0
	0	0.90913	0	0		0	774.444	0	0		0	1.2234	0	0		0	0.808115	0	0		0	454.565	0	0		0.00369495	3.07913	0.12	0.00273212		0	1.0496	0	0		0	589.087	0	0		0.0020939	1.3066	0.160256	0.000208673		0	1.58433	0	0
	0	0.911391	0	0		0	776.37	0	0		0.00249869	1.22644	0.203735	0.000766178		0	0.810126	0	0		0	455.696	0	0		0.00617358	3.08679	0.2	0.00459988		0	1.05221	0	0		0	590.552	0	0		0	1.30985	0	0		0	1.58827	0	0
	0.00206475	0.913653	0.225989	0.000522978		4.05363	778.297	0.520833	521.106		0	1.22948	0	0		0	0.812136	0	0		0	456.826	0	0		0.01114	3.09445	0.36	0.00836362		0	1.05482	0	0		0	592.018	0	0		0	1.3131	0	0		0	1.59221	0	0
	0	0.915914	0	0		0	780.223	0	0		0	1.23253	0	0		0.00604671	0.814146	0.742706	0.000352592		0	457.957	0	0		0.00124084	3.10211	0.04	0.000938655		0.000286103	1.05743	0.0270563	6.2451e-05		0	593.483	0	0		0	1.31635	0	0		0	1.59615	0	0
	0	0.918176	0	0		0	782.15	0	0		0.00125865	1.23557	0.101868	0.000394581		0	0.816156	0	0		0	459.088	0	0		0.0124391	3.10977	0.4	0.00948065		0	1.06005	0	0		0	594.949	0	0		0	1.3196	0	0		0	1.60009	0	0
	0.00104004	0.920437	0.112994	0.000268917		3.26698	784.076	0.416667	432.258		0	1.23861	0	0		0	0.818167	0	0		0	460.219	0	0		0.00997576	3.11743	0.32	0.00766018		0	1.06266	0	0		0	596.414	0	0		0.00211995	1.32285	0.160256	0.000227892		0	1.60403	0	0
	0	0.922699	0	0		0	786.003	0	0		0.00252969	1.24166	0.203735	0.000804671		0.00348086	0.820177	0.424403	0.000212789		0	461.349	0	0		0.0125003	3.12509	0.4	0.00967027		0.000576444	1.06527	0.0541126	0.000129008		0	597.879	0	0		0	1.3261	0	0		0	1.60797	0	0
	0	0.92496	0	0		0	787.929	0	0		0	1.2447	0	0		0	0.822187	0	0		0	462.48	0	0		0.00877169	3.13274	0.28	0.00683604		0	1.06788	0	0		0	599.345	0	0		0	1.32935	0	0		0.00140533	1.61191	0.087184	0.00053779
	0.00209542	0.927222	0.225989	0.000552897		0	789.856	0	0		0.00254209	1.24774	0.203735	0.000820334		0	0.824197	0	0		0	463.611	0	0		0.0188424	3.1404	0.6	0.0147926		0	1.07049	0	0		0	600.81	0	0		0	1.3326	0	0		0	1.61586	0	0
	0	0.929483	0	0		3.71148	791.782	0.46875	509.837		0	1.25079	0	0		0	0.826208	0	0		0	464.742	0	0		0.00629613	3.14806	0.2	0.0049791		0	1.0731	0	0		0	602.275	0	0		0	1.33585	0	0		0	1.6198	0	0
	0	0.931745	0	0		0	793.709	0	0		0	1.25383	0	0		0.00307561	0.828218	0.371353	0.000199802		0	465.873	0	0		0.00631145	3.15572	0.2	0.00502756		0.000291047	1.07571	0.0270563	6.72927e-05		0	603.741	0	0		0.00214599	1.3391	0.160256	0.000247958		0	1.62374	0	0
	0	0.934006	0	0		0	795.635	0	0		0.00256069	1.25687	0.203735	0.000844111		0	0.830228	0	0		0	467.003	0	0		0.0151842	3.16338	0.48	0.012183		0	1.07832	0	0		0	605.206	0	0		0	1.34235	0	0		0	1.62768	0	0
	0	0.936268	0	0		0	797.562	0	0		0	1.25992	0	0		0	0.832238	0	0		0	468.134	0	0		0.00887892	3.17104	0.28	0.00717526		0	1.08093	0	0		0	606.672	0	0		0	1.3456	0	0		0	1.63162	0	0
	0	0.938529	0	0		1.6656	799.488	0.208333	237.307		0.00171539	1.26296	0.135823	0.000573432		0.00309801	0.834248	0.371353	0.000210327		0	469.265	0	0		0.0152578	3.1787	0.48	0.0124184		0	1.08354	0	0		0	608.137	0	0		0	1.34885	0	0		0	1.63556	0	0
	0.00106304	0.940791	0.112994	0.000291825		0	801.415	0	0		0	1.266	0	0		0	0.836259	0	0		0	470.396	0	0		0.0127454	3.18636	0.4	0.0104475		0	1.08615	0	0		0	609.602	0	0		0	1.3521	0	0		0	1.6395	0	0
	0	0.943053	0	0		0	803.341	0	0		0.00129275	1.26905	0.101868	0.00043817		0	0.838269	0	0		0	471.526	0	0		0.0127761	3.19402	0.4	0.0105468		0	1.08877	0	0		0	611.068	0	0		0	1.35535	0	0		0.00429846	1.64344	0.261552	0.0017455
	0	0.945314	0	0		3.35528	805.268	0.416667	491.008		0	1.27209	0	0		0	0.840279	0	0		0	472.657	0	0		0.00512269	3.20168	0.16	0.0042586		0.000295286	1.09138	0.0270563	7.15868e-05		0	612.533	0	0		0	1.3586	0	0		0	1.64739	0	0
	0	0.947576	0	0		0	807.194	0	0		0	1.27513	0	0		0.0035747	0.842289	0.424403	0.000256891		0	473.788	0	0		0.0141211	3.20934	0.44	0.0118214		0	1.09399	0	0		0	613.999	0	0		0	1.36185	0	0		0	1.65133	0	0
	0.00107326	0.949837	0.112994	0.000302306		0	809.12	0	0		0.00347213	1.27818	0.271647	0.00120121		0	0.8443	0	0		0	474.918	0	0		0.0115812	3.217	0.36	0.00976263		0.000296699	1.0966	0.0270563	7.30477e-05		0	615.464	0	0		0	1.3651	0	0		0	1.65527	0	0
	0	0.952099	0	0		0	811.047	0	0		0	1.28122	0	0		0	0.84631	0	0		0	476.049	0	0		0.0116088	3.22466	0.36	0.00985366		0	1.09921	0	0		0	616.929	0	0		0	1.36835	0	0		0	1.65921	0	0
	0	0.95436	0	0		2.54054	812.973	0.3125	384.975		0.00130825	1.28426	0.101868	0.000458737		0.00315026	0.84832	0.371353	0.000235935		0	477.18	0	0		0.0284444	3.23232	0.88	0.0243103		0.000298112	1.10182	0.0270563	7.45234e-05		0	618.395	0	0		0	1.3716	0	0		0	1.66315	0	0
	0.00540464	0.956622	0.564972	0.00155144		0	814.9	0	0		0	1.28731	0	0		0	0.85033	0	0		0	478.311	0	0		0.00647996	3.23998	0.2	0.0055761		0	1.10443	0	0		0	619.86	0	0		0	1.37485	0	0		0.00290687	1.66709	0.174368	0.00123201
	0	0.958883	0	0		0	816.826	0	0		0.00131445	1.29035	0.101868	0.000467097		0	0.852341	0	0		0	479.442	0	0		0.0155887	3.24764	0.48	0.0135057		0.000299525	1.10704	0.0270563	7.60138e-05		0	621.326	0	0		0	1.3781	0	0		0	1.67103	0	0
	0	0.961145	0	0		0	818.753	0	0		0	1.29339	0	0		0	0.854351	0	0		0	480.572	0	0		0.00651059	3.2553	0.2	0.00567888		0	1.10965	0	0		0	622.791	0	0		0	1.38135	0	0		0	1.67497	0	0
	0.00217719	0.963406	0.225989	0.00063675		2.13719	820.679	0.260417	335.054		0	1.29644	0	0		0.00272582	0.856361	0.318302	0.000215338		0	481.703	0	0		0.00652591	3.26296	0.2	0.00573063		0	1.11227	0	0		0	624.256	0	0		0	1.3846	0	0		0	1.67891	0	0
	0	0.965668	0	0		0	822.606	0	0		0.00308874	1.29948	0.237691	0.00111948		0	0.858371	0	0		0	482.834	0	0		0.00784948	3.27062	0.24	0.00693913		0	1.11488	0	0		0	625.722	0	0		0	1.38785	0	0		0	1.68285	0	0
	0	0.967929	0	0		0	824.532	0	0		0	1.30252	0	0		0	0.860382	0	0		0	483.965	0	0		0.0157357	3.27828	0.48	0.0140036		0.000604701	1.11749	0.0541126	0.000158078		0	627.187	0	0		0	1.3911	0	0		0.00147062	1.6868	0.087184	0.000645226
	0.00219252	0.970191	0.225989	0.000653131		0	826.459	0	0		0.000886632	1.30557	0.0679117	0.00032555		0.00228751	0.862392	0.265252	0.000187866		0	485.095	0	0		0.00131437	3.28594	0.04	0.00117745		0	1.1201	0	0		0	628.653	0	0		0	1.39435	0	0		0	1.69074	0	0
	0	0.972452	0	0		3.02015	828.385	0.364583	489.447		0	1.30861	0	0		0	0.864402	0	0		0	486.226	0	0		0.00395231	3.29359	0.12	0.00356397		0.000607526	1.12271	0.0541126	0.000161147		0	630.118	0	0		0	1.3976	0	0		0	1.69468	0	0
	0	0.974714	0	0		0	830.312	0	0		0.00178153	1.31165	0.135823	0.000662598		0	0.866412	0	0		0	487.357	0	0		0.0118845	3.30125	0.36	0.0107872		0	1.12532	0	0		0	631.583	0	0		0	1.40085	0	0		0	1.69862	0	0
	0	0.976975	0	0		0	832.238	0	0		0	1.31469	0	0		0	0.868422	0	0		0	488.488	0	0		0.0039707	3.30891	0.12	0.00362761		0.000305176	1.12793	0.0270563	8.21226e-05		0	633.049	0	0		0	1.4041	0	0		0	1.70256	0	0
	0	0.979237	0	0		1.30338	834.165	0.15625	216.432		0	1.31774	0	0		0.00230884	0.870433	0.265252	0.00019939		0	489.618	0	0		0.010613	3.31657	0.32	0.00975906		0	1.13054	0	0		0	634.514	0	0		0	1.40735	0	0		0	1.7065	0	0
	0	0.981498	0	0		0	836.091	0	0		0.00493331	1.32078	0.373514	0.00187009		0	0.872443	0	0		0	490.749	0	0		0.00797816	3.32423	0.24	0.00738364		0	1.13315	0	0		0	635.98	0	0		0	1.4106	0	0		0	1.71044	0	0
	0	0.98376	0	0		0	838.018	0	0		0	1.32383	0	0		0	0.874453	0	0		0	491.88	0	0		0.00399827	3.33189	0.12	0.00372414		0	1.13576	0	0		0	637.445	0	0		0	1.41385	0	0		0	1.71438	0	0
	0	0.986021	0	0		0	839.944	0	0		0.0018022	1.32687	0.135823	0.000691783		0.0013949	0.876463	0.159151	0.000124955		0	493.011	0	0		0.0066791	3.33955	0.2	0.00626098		0.000924005	1.13837	0.0811688	0.000255797		0	638.91	0	0		0	1.4171	0	0		0	1.71833	0	0
	0	0.988283	0	0		1.7539	841.871	0.208333	300.65		0	1.32991	0	0		0	0.878474	0	0		0	494.141	0	0		0.00535554	3.34721	0.16	0.00505225		0	1.14098	0	0		0	640.376	0	0		0	1.42036	0	0		0	1.72227	0	0
	0.00111926	0.990544	0.112994	0.000351762		0	843.797	0	0		0.000905233	1.33295	0.0679117	0.000351817		0	0.880484	0	0		0	495.272	0	0		0.00402585	3.35487	0.12	0.00382192		0	1.1436	0	0		0	641.841	0	0		0	1.42361	0	0		0	1.72621	0	0
	0	0.992806	0	0		0	845.724	0	0		0	1.336	0	0		0	0.882494	0	0		0	496.403	0	0		0.00672506	3.36253	0.2	0.00642466		0	1.14621	0	0		0	643.306	0	0		0.00457325	1.42685	0.320513	0.000741876		0	1.73015	0	0
	0	0.995067	0	0		0	847.65	0	0		0	1.33904	0	0		0.00187693	0.884504	0.212202	0.000176306		0	497.534	0	0		0.0053923	3.37019	0.16	0.00518375		0	1.14882	0	0		0	644.772	0	0		0	1.4301	0	0		0	1.73409	0	0
	0	0.997329	0	0		0.884976	849.577	0.104167	156.486		0.000455716	1.34208	0.0339559	0.000180399		0	0.886515	0	0		0	498.664	0	0		0.00405342	3.37785	0.12	0.00392098		0.000623068	1.15143	0.0541126	0.000178555		0	646.237	0	0		0	1.43336	0	0		0	1.73803	0	0
	0.00225896	0.99959	0.225989	0.00072652		0	851.503	0	0		0	1.34513	0	0		0	0.888525	0	0		0.350488	499.795	0.0701262	31.9741		0.00677102	3.38551	0.2	0.00659045		0	1.15404	0	0		0	647.703	0	0		0	1.43661	0	0		0	1.74197	0	0
	0	1.00185	0	0		0	853.429	0	0		0.000457783	1.34817	0.0339559	0.000183425		0	0.890535	0	0		0	500.926	0	0		0.00135727	3.39317	0.04	0.00132924		0.000312947	1.15665	0.0270563	9.09082e-05		0	649.168	0	0		0	1.43986	0	0		0	1.74591	0	0
	0	1.00411	0	0		1.78199	855.356	0.208333	322.374		0	1.35122	0	0		0.00236749	0.892545	0.265252	0.00023285		0	502.057	0	0		0.00680166	3.40083	0.2	0.00670216		0	1.15926	0	0		0	650.633	0	0		0.00231267	1.44311	0.160256	0.00039642		0	1.74985	0	0
	0.00227429	1.00638	0.225989	0.000744011		0	857.282	0	0		0.00229925	1.35426	0.169779	0.000932377		0	0.894556	0	0		0	503.188	0	0		0.00409019	3.40849	0.12	0.00405502		0	1.16187	0	0		0	652.099	0	0		0	1.44636	0	0		0	1.75379	0	0
	0	1.00864	0	0		0	859.209	0	0		0	1.3573	0	0		0	0.896566	0	0		0	504.318	0	0		0.00273292	3.41615	0.08	0.00272592		0	1.16448	0	0		0	653.564	0	0		0	1.44961	0	0		0	1.75774	0	0
	0	1.0109	0	0		0	861.135	0	0		0	1.36034	0	0		0.00238349	0.898576	0.265252	0.000242426		0	505.449	0	0		0.00273905	3.42381	0.08	0.00274859		0.000315772	1.16709	0.0270563	9.42136e-05		0	655.03	0	0		0.0023283	1.45286	0.160256	0.000412117		0	1.76168	0	0
	0.00114481	1.01316	0.112994	0.000380856		0	863.062	0	0		0	1.36339	0	0		0	0.900586	0	0		0.355245	506.58	0.0701262	34.0382		0.00137259	3.43147	0.04	0.00138568		0	1.16971	0	0		0	656.495	0	0		0	1.45611	0	0		0.00153934	1.76562	0.087184	0.00076888
	0	1.01542	0	0		0	864.988	0	0		0	1.36643	0	0		0	0.902597	0	0		0	507.711	0	0		0.0027513	3.43913	0.08	0.00279421		0	1.17232	0	0		0	657.96	0	0		0	1.45936	0	0		0	1.76956	0	0
	0	1.01768	0	0		0	866.915	0	0		0.00232508	1.36947	0.169779	0.000971059		0	0.904607	0	0		0	508.841	0	0		0.00275743	3.44679	0.08	0.00281716		0	1.17493	0	0		0	659.426	0	0		0	1.46261	0	0		0	1.7735	0	0
	0.00115248	1.01994	0.112994	0.000389809		0	868.841	0	0		0	1.37252	0	0		0.000480964	0.906617	0.0530504	5.10987e-05		0	509.972	0	0		0.00414533	3.45445	0.12	0.00426031		0.000318598	1.17754	0.0270563	9.75781e-05		0	660.891	0	0		0	1.46586	0	0		0	1.77744	0	0
	0	1.02221	0	0		1.36057	870.768	0.15625	261.097		0.000934167	1.37556	0.0679117	0.000394701		0	0.908627	0	0		0	511.103	0	0		0.00415453	3.46211	0.12	0.00429502		0	1.18015	0	0		0	662.356	0	0		0	1.46911	0	0		0.00310616	1.78138	0.174368	0.00158982
	0	1.02447	0	0		0	872.694	0	0		0	1.3786	0	0		0	0.910637	0	0		0	512.234	0	0		0.00416372	3.46976	0.12	0.00432986		0	1.18276	0	0		0	663.822	0	0		0	1.47236	0	0		0	1.78532	0	0
	0.00116015	1.02673	0.112994	0.000398867		0	874.621	0	0		0	1.38165	0	0		0.000968327	0.912648	0.106101	0.000106208		0	513.364	0	0		0.00139097	3.47742	0.04	0.00145495		0	1.18537	0	0		0	665.287	0	0		0	1.47561	0	0		0	1.78926	0	0
	0	1.02899	0	0		1.3696	876.547	0.15625	268.532		0.000470184	1.38469	0.0339559	0.000202106		0	0.914658	0	0		0	514.495	0	0		0.00139403	3.48508	0.04	0.00146666		0	1.18798	0	0		0	666.753	0	0		0	1.47886	0	0		0	1.79321	0	0
	0	1.03125	0	0		0	878.474	0	0		0	1.38773	0	0		0	0.916668	0	0		0	515.626	0	0		0.0013971	3.49274	0.04	0.00147842		0	1.19059	0	0		0	668.218	0	0		0	1.48211	0	0		0	1.79715	0	0
	0	1.03351	0	0		0	880.4	0	0		0.00047225	1.39078	0.0339559	0.000205307		0	0.918678	0	0		0	516.757	0	0		0.00140016	3.5004	0.04	0.00149022		0	1.1932	0	0		0	669.683	0	0		0	1.48536	0	0		0	1.80109	0	0
	0	1.03577	0	0		0	882.327	0	0		0	1.39382	0	0		0.00146529	0.920689	0.159151	0.000167512		0	517.887	0	0		0.00280645	3.50806	0.08	0.00300415		0	1.19582	0	0		0	671.149	0	0		0	1.48861	0	0		0.0015737	1.80503	0.087184	0.000834769
	0	1.03804	0	0		0	884.253	0	0		0.000474317	1.39686	0.0339559	0.000208534		0	0.922699	0	0		0	519.018	0	0		0.00140629	3.51572	0.04	0.00151397		0	1.19843	0	0		0	672.614	0	0		0	1.49186	0	0		0	1.80897	0	0
	0	1.0403	0	0		0	886.18	0	0		0	1.39991	0	0		0	0.924709	0	0		0	520.149	0	0		0	3.52338	0	0		0	1.20104	0	0		0	674.08	0	0		0	1.49511	0	0		0	1.81291	0	0
	0	1.04256	0	0		0	888.106	0	0		0	1.40295	0	0		0.000491628	0.926719	0.0530504	5.79325e-05		0	521.28	0	0		0	3.53104	0	0		0	1.20365	0	0		0	675.545	0	0		0	1.49836	0	0		0	1.81685	0	0
	0	1.04482	0	0		0	890.033	0	0		0.0028645	1.40599	0.203735	0.00128052		0	0.92873	0	0		0	522.41	0	0		0.00283096	3.5387	0.08	0.00309989		0	1.20626	0	0		0	677.01	0	0		0	1.50161	0	0		0.00158744	1.82079	0.087184	0.000861884
	0	1.04708	0	0		0	891.959	0	0		0	1.40904	0	0		0	0.93074	0	0		0	523.541	0	0		0	3.54636	0	0		0	1.20887	0	0		0	678.476	0	0		0	1.50486	0	0		0	1.82473	0	0
	0.0011857	1.04934	0.112994	0.000429809		0	893.885	0	0		0.000958968	1.41208	0.0679117	0.000433421		0	0.93275	0	0		0	524.672	0	0		0	3.55402	0	0		0	1.21148	0	0		0	679.941	0	0		0	1.50811	0	0		0.00159431	1.82868	0.087184	0.000875603
	0	1.0516	0	0		0	895.812	0	0		0	1.41512	0	0		0.000495894	0.93476	0.0530504	6.07861e-05		0	525.803	0	0		0.00142467	3.56168	0.04	0.00158634		0	1.21409	0	0		0	681.407	0	0		0	1.51136	0	0		0	1.83262	0	0
	0	1.05387	0	0		0	897.738	0	0		0.00144465	1.41817	0.101868	0.000660075		0	0.936771	0	0		0	526.933	0	0		0	3.56934	0	0		0.000329195	1.2167	0.0270563	0.00011072		0	682.872	0	0		0	1.51461	0	0		0	1.83656	0	0
	0	1.05613	0	0		0	899.665	0	0		0	1.42121	0	0		0	0.938781	0	0		0	528.064	0	0		0	3.577	0	0		0	1.21931	0	0		0	684.337	0	0		0	1.51786	0	0		0	1.8405	0	0
	0	1.05839	0	0		0	901.591	0	0		0	1.42425	0	0		0	0.940791	0	0		0	529.195	0	0		0	3.58466	0	0		0.000330607	1.22192	0.0270563	0.000112535		0	685.803	0	0		0	1.52111	0	0		0	1.84444	0	0
	0	1.06065	0	0		0	903.518	0	0		0.000969301	1.4273	0.0679117	0.000450089		0	0.942801	0	0		0	530.326	0	0		0	3.59232	0	0		0	1.22454	0	0		0	687.268	0	0		0	1.52436	0	0		0	1.84838	0	0
	0.00240206	1.06291	0.225989	0.000897859		0	905.444	0	0		0	1.43034	0	0		0	0.944812	0	0		0	531.456	0	0		0.00143999	3.59998	0.04	0.00164794		0.00033202	1.22715	0.0270563	0.000114365		0	688.734	0	0		0	1.52761	0	0		0	1.85232	0	0
	0	1.06517	0	0		0	907.371	0	0		0.000486718	1.43338	0.0339559	0.000228422		0	0.946822	0	0		0	532.587	0	0		0.00288611	3.60764	0.08	0.00332081		0	1.22976	0	0		0	690.199	0	0		0	1.53086	0	0		0	1.85626	0	0
	0	1.06744	0	0		0	909.297	0	0		0	1.43643	0	0		0.000503359	0.948832	0.0530504	6.59451e-05		0	533.718	0	0		0.00144612	3.6153	0.04	0.00167291		0	1.23237	0	0		0	691.664	0	0		0	1.53411	0	0		0.0016218	1.86021	0.087184	0.000931565
	0.0036261	1.0697	0.338983	0.00137594		0	911.224	0	0		0.000977568	1.43947	0.0679117	0.00046365		0	0.950842	0	0		0.375069	534.849	0.0701262	43.3337		0.00144918	3.62296	0.04	0.00168547		0	1.23498	0	0		0	693.13	0	0		0	1.53736	0	0		0	1.86415	0	0
	0	1.07196	0	0		0.475599	913.15	0.0520833	106.015		0	1.44251	0	0		0	0.952852	0	0		0	535.98	0	0		0	3.63061	0	0		0.000334846	1.23759	0.0270563	0.000118068		0	694.595	0	0		0	1.54061	0	0		0.00162867	1.86809	0.087184	0.000945825
	0	1.07422	0	0		0	915.077	0	0		0	1.44556	0	0		0	0.954863	0	0		0	537.11	0	0		0	3.63827	0	0		0	1.2402	0	0		0	696.061	0	0		0	1.54386	0	0		0	1.87203	0	0
	0.00121636	1.07648	0.112994	0.000468466		0	917.003	0	0		0.000491884	1.4486	0.0339559	0.000236976		0	0.956873	0	0		0	538.241	0	0		0	3.64593	0	0		0	1.24281	0	0		0	697.526	0	0		0	1.54711	0	0		0.00163554	1.87597	0.087184	0.000960195
	0	1.07874	0	0		0	918.93	0	0		0	1.45164	0	0		0	0.958883	0	0		0	539.372	0	0		0	3.65359	0	0		0	1.24542	0	0		0	698.991	0	0		0	1.55036	0	0		0	1.87991	0	0
	0	1.081	0	0		0.479613	920.856	0.0520833	109.667		0	1.45469	0	0		0	0.960893	0	0		0	540.503	0	0		0	3.66125	0	0		0	1.24803	0	0		0	700.457	0	0		0	1.55361	0	0		0	1.88385	0	0
	0	1.08327	0	0		0	922.783	0	0		0	1.45773	0	0		0.00102165	0.962904	0.106101	0.000142628		0	541.633	0	0		0	3.66891	0	0		0	1.25065	0	0		0	701.922	0	0		0.00249498	1.55686	0.160256	0.000598502		0	1.88779	0	0
	0	1.08553	0	0		0	924.709	0	0		0	1.46077	0	0		0	0.964914	0	0		0	542.764	0	0		0	3.67657	0	0		0.00101725	1.25326	0.0811688	0.000371204		0	703.387	0	0		0	1.56011	0	0		0.00164929	1.89173	0.087184	0.00098926
	0	1.08779	0	0		0.482623	926.636	0.0520833	112.447		0.000497051	1.46382	0.0339559	0.000245688		0	0.966924	0	0		0	543.895	0	0		0.00147369	3.68423	0.04	0.0017876		0	1.25587	0	0		0	704.853	0	0		0.00250539	1.56336	0.160256	0.000611302		0	1.89567	0	0
	0	1.09005	0	0		0	928.562	0	0		0	1.46686	0	0		0	0.968934	0	0		0	545.026	0	0		0	3.69189	0	0		0	1.25848	0	0		0	706.318	0	0		0	1.56662	0	0		0.00165616	1.89962	0.087184	0.00100395
	0.00370276	1.09231	0.338983	0.00147535		0	930.489	0	0		0.000499118	1.4699	0.0339559	0.000249216		0	0.970945	0	0		0	546.156	0	0		0	3.69955	0	0		0	1.26109	0	0		0	707.784	0	0		0	1.56987	0	0		0	1.90356	0	0
	0	1.09457	0	0		0	932.415	0	0		0	1.47295	0	0		0	0.972955	0	0		0	547.287	0	0		0	3.70721	0	0		0	1.2637	0	0		0	709.249	0	0		0	1.57312	0	0		0	1.9075	0	0
	0	1.09684	0	0		0	934.341	0	0		0.000501185	1.47599	0.0339559	0.00025277		0	0.974965	0	0		0	548.418	0	0		0	3.71487	0	0		0	1.26631	0	0		0	710.714	0	0		0	1.57637	0	0		0	1.91144	0	0
	0	1.0991	0	0		0	936.268	0	0		0	1.47903	0	0		0	0.976975	0	0		0	549.549	0	0		0	3.72253	0	0		0.000343323	1.26892	0.0270563	0.000129534		0	712.18	0	0		0	1.57962	0	0		0	1.91538	0	0
	0	1.10136	0	0		0	938.194	0	0		0	1.48208	0	0		0	0.978986	0	0		0	550.679	0	0		0	3.73019	0	0		0	1.27153	0	0		0	713.645	0	0		0	1.58287	0	0		0	1.91932	0	0
	0	1.10362	0	0		0	940.121	0	0		0.000504285	1.48512	0.0339559	0.000258148		0	0.980996	0	0		0	551.81	0	0		0	3.73785	0	0		0.000344736	1.27414	0.0270563	0.000131497		0	715.111	0	0		0	1.58612	0	0		0	1.92326	0	0
	0	1.10588	0	0		0.9813	942.048	0.104167	240.061		0	1.48816	0	0		0	0.983006	0	0		0	552.941	0	0		0	3.74551	0	0		0	1.27676	0	0		0	716.576	0	0		0	1.58937	0	0		0	1.9272	0	0
	0	1.10814	0	0		0	943.974	0	0		0	1.4912	0	0		0	0.985016	0	0		0	554.072	0	0		0	3.75317	0	0		0.000346149	1.27937	0.0270563	0.000133474		0	718.041	0	0		0	1.59262	0	0		0	1.93114	0	0
	0	1.11041	0	0		0	945.9	0	0		0	1.49425	0	0		0	0.987027	0	0		0	555.202	0	0		0	3.76083	0	0		0	1.28198	0	0		0	719.507	0	0		0	1.59587	0	0		0	1.93509	0	0
	0	1.11267	0	0		0	947.827	0	0		0.00101684	1.49729	0.0679117	0.000530813		0	0.989037	0	0		0	556.333	0	0		0	3.76849	0	0		0.000347562	1.28459	0.0270563	0.000135466		0	720.972	0	0		0	1.59912	0	0		0	1.93903	0	0
	0	1.11493	0	0		0	949.753	0	0		0	1.50033	0	0		0.000525754	0.991047	0.0530504	8.26823e-05		0	557.464	0	0		0	3.77615	0	0		0	1.2872	0	0		0	722.438	0	0		0	1.60237	0	0		0	1.94297	0	0
	0	1.11719	0	0		0	951.68	0	0		0	1.50338	0	0		0	0.993057	0	0		0	558.595	0	0		0	3.78381	0	0		0	1.28981	0	0		0	723.903	0	0		0	1.60562	0	0		0	1.94691	0	0
	0.00252983	1.11945	0.225989	0.00106615		0	953.606	0	0		0.000511518	1.50642	0.0339559	0.000270916		0	0.995067	0	0		0	559.725	0	0		0	3.79146	0	0		0	1.29242	0	0		0	725.368	0	0		0	1.60887	0	0		0.00170083	1.95085	0.087184	0.00110211
	0	1.12171	0	0		0	955.533	0	0		0	1.50947	0	0		0	0.997078	0	0		0	560.856	0	0		0	3.79912	0	0		0.000350387	1.29503	0.0270563	0.000139494		0	726.834	0	0		0	1.61212	0	0		0	1.95479	0	0
	0	1.12397	0	0		0	957.459	0	0		0	1.51251	0	0		0.00053002	0.999088	0.0530504	8.60847e-05		0	561.987	0	0		0	3.80678	0	0		0	1.29764	0	0		0	728.299	0	0		0	1.61537	0	0		0.0017077	1.95873	0.087184	0.00111761
	0	1.12624	0	0		0	959.386	0	0		0	1.51555	0	0		0	1.0011	0	0		0	563.118	0	0		0	3.81444	0	0		0	1.30025	0	0		0	729.764	0	0		0	1.61862	0	0		0	1.96267	0	0
	0	1.1285	0	0		0	961.312	0	0		0.00257826	1.51859	0.169779	0.00139176		0	1.00311	0	0		0	564.248	0	0		0	3.8221	0	0		0	1.30286	0	0		0	731.23	0	0		0	1.62187	0	0		0	1.96662	0	0
	0	1.13076	0	0		0.501687	963.239	0.0520833	130.861		0	1.52164	0	0		0	1.00512	0	0		0	565.379	0	0		0	3.82976	0	0		0	1.30547	0	0		0	732.695	0	0		0	1.62512	0	0		0	1.97056	0	0
	0	1.13302	0	0		0	965.165	0	0		0	1.52468	0	0		0	1.00713	0	0		0	566.51	0	0		0	3.83742	0	0		0.000353919	1.30809	0.0270563	0.000144613		0	734.161	0	0		0	1.62837	0	0		0	1.9745	0	0
	0	1.13528	0	0		0	967.092	0	0		0	1.52772	0	0		0	1.00914	0	0		0	567.641	0	0		0	3.84508	0	0		0	1.3107	0	0		0	735.626	0	0		0	1.63162	0	0		0	1.97844	0	0
	0	1.13754	0	0		0	969.018	0	0		0	1.53077	0	0		0	1.01115	0	0		0	568.771	0	0		0	3.85274	0	0		0	1.31331	0	0		0	737.091	0	0		0	1.63487	0	0		0.00172832	1.98238	0.087184	0.00116479
	0	1.1398	0	0		0.5057	970.945	0.0520833	134.916		0	1.53381	0	0		0.00161246	1.01316	0.159151	0.000276612		0	569.902	0	0		0	3.8604	0	0		0	1.31592	0	0		0	738.557	0	0		0	1.63812	0	0		0	1.98632	0	0
	0	1.14207	0	0		0	972.871	0	0		0	1.53685	0	0		0	1.01517	0	0		0	571.033	0	0		0	3.86806	0	0		0.000356745	1.31853	0.0270563	0.000148774		0	740.022	0	0		0	1.64137	0	0		0.00173519	1.99026	0.087184	0.00118073
	0	1.14433	0	0		0	974.798	0	0		0.000522885	1.5399	0.0339559	0.000291603		0	1.01718	0	0		0	572.164	0	0		0	3.87572	0	0		0	1.32114	0	0		0	741.488	0	0		0	1.64462	0	0		0	1.9942	0	0
	0	1.14659	0	0		0	976.724	0	0		0	1.54294	0	0		0	1.01919	0	0		0	573.294	0	0		0	3.88338	0	0		0	1.32375	0	0		0	742.953	0	0		0	1.64787	0	0		0.00348412	1.99814	0.174368	0.00239355
	0.00129814	1.14885	0.112994	0.000579689		0	978.651	0	0		0	1.54598	0	0		0	1.0212	0	0		0	574.425	0	0		0	3.89104	0	0		0	1.32636	0	0		0	744.418	0	0		0	1.65112	0	0		0	2.00209	0	0
	0	1.15111	0	0		0	980.577	0	0		0.00105197	1.54903	0.0679117	0.000594755		0	1.02321	0	0		0	575.556	0	0		0	3.8987	0	0		0	1.32897	0	0		0	745.884	0	0		0	1.65437	0	0		0.00349787	2.00603	0.174368	0.00242587
	0	1.15337	0	0		0	982.503	0	0		0	1.55207	0	0		0	1.02522	0	0		0	576.687	0	0		0	3.90636	0	0		0	1.33159	0	0		0	747.349	0	0		0	1.65762	0	0		0	2.00997	0	0
	0.0013058	1.15563	0.112994	0.000590722		0.512724	984.43	0.0520833	142.16		0.000528052	1.55511	0.0339559	0.000301258		0.00054495	1.02723	0.0530504	9.85333e-05		0.405202	577.818	0.0701262	59.6093		0.00156561	3.91402	0.04	0.00219733		0.000360984	1.3342	0.0270563	0.000155126		0.204706	748.815	0.0273373	60.4605		0.00266165	1.66087	0.160256	0.000819558		0.0017558	2.01391	0.087184	0.0012292
	0			0		0			0		0			0		0			0		0			0		0			0		0			0		0			0		0			0		0			0
	0			0		0			0		0			0		0			0		0			0		0			0		0			0		0			0		0			0		0			0
	0			0		0			0		0			0		0			0		0			0		0			0		0			0		0			0		0			0		0			0
	0			0		0			0		0			0		0			0		0			0		0			0		0			0		0			0		0			0		0			0
	0			0		0			0		0			0		0			0		0			0		0			0		0			0		0			0		0			0		0			0
	0			0		0			0		0			0		0			0		0			0		0			0		0			0		0			0		0			0		0			0
	0			0		0			0		0			0		0			0		0			0		0			0		0			0		0			0		0			0		0			0
	0			0		0			0		0			0		0			0		0			0		0			0		0			0		0			0		0			0		0			0
	0			0		0			0		0			0		0			0		0			0		0			0		0			0		0			0		0			0		0			0
	0			0		0			0		0			0		0			0		0			0		0			0		0			0		0			0		0			0		0			0
	0			0		0			0		0			0		0			0		0			0		0			0		0			0		0			0		0			0		0			0
	0			0		0			0		0			0		0			0		0			0		0			0		0			0		0			0		0			0		0			0
	0			0		0			0		0			0		0			0		0			0		0			0		0			0		0			0		0			0		0			0
	0			0		0			0		0			0		0			0		0			0		0			0		0			0		0			0		0			0		0			0
	0			0		0			0		0			0		0			0		0			0		0			0		0			0		0			0		0			0		0			0
	0			0		0			0		0			0		0			0		0			0		0			0		0			0		0			0		0			0		0			0
	0			0		0			0		0			0		0			0		0			0		0			0		0			0		0			0		0			0		0			0
	0			0		0			0		0			0		0			0		0			0		0			0		0			0		0			0		0			0		0			0
	0			0		0			0		0			0		0			0		0			0		0			0		0			0		0			0		0			0		0			0
	0			0		0			0		0			0		0			0		0			0		0			0		0			0		0			0		0			0		0			0
	0			0		0			0		0			0		0			0		0			0		0			0		0			0		0			0		0			0		0			0
	0			0		0			0		0			0		0			0		0			0		0			0		0			0		0			0		0			0		0			0
	0			0		0			0		0			0		0			0		0			0		0			0		0			0		0			0		0			0		0			0
	0			0		0			0		0			0		0			0		0			0		0			0		0			0		0			0		0			0		0			0
	0			0		0			0		0			0		0			0		0			0		0			0		0			0		0			0		0			0		0			0
	0			0		0			0		0			0		0			0		0			0		0			0		0			0		0			0		0			0		0			0
	0			0		0			0		0			0		0			0		0			0		0			0		0			0		0			0		0			0		0			0
	0			0		0			0		0			0		0			0		0			0		0			0		0			0		0			0		0			0		0			0
	0			0		0			0		0			0		0			0		0			0		0			0		0			0		0			0		0			0		0			0
	0			0		0			0		0			0		0			0		0			0		0			0		0			0		0			0		0			0		0			0
	0			0		0			0		0			0		0			0		0			0		0			0		0			0		0			0		0			0		0			0
	0			0		0			0		0			0		0			0		0			0		0			0		0			0		0			0		0			0		0			0
	0			0		0			0		0			0		0			0		0			0		0			0		0			0		0			0		0			0		0			0
	0			0		0			0		0			0		0			0		0			0		0			0		0			0		0			0		0			0		0			0
	0			0		0			0		0			0		0			0		0			0		0			0		0			0		0			0		0			0		0			0
	0			0		0			0		0			0		0			0		0			0		0			0		0			0		0			0		0			0		0			0
	0			0		0			0		0			0		0			0		0			0		0			0		0			0		0			0		0			0		0			0
	0			0		0			0		0			0		0			0		0			0		0			0		0			0		0			0		0			0		0			0
	0			0		0			0		0			0		0			0		0			0		0			0		0			0		0			0		0			0		0			0
	0			0		0			0		0			0		0			0		0			0		0			0		0			0		0			0		0			0		0			0
	0			0		0			0		0			0		0			0		0			0		0			0		0			0		0			0		0			0		0			0
	0			0		0			0		0			0		0			0		0			0		0			0		0			0		0			0		0			0		0			0
	0			0		0			0		0			0		0			0		0			0		0			0		0			0		0			0		0			0		0			0
	0			0		0			0		0			0		0			0		0			0		0			0		0			0		0			0		0			0		0			0
	0			0		0			0		0			0		0			0		0			0		0			0		0			0		0			0		0			0		0			0
	0			0		0			0		0			0		0			0		0			0		0			0		0			0		0			0		0			0		0			0
	0			0		0			0		0			0		0			0		0			0		0			0		0			0		0			0		0			0		0			0
	0			0		0			0		0			0		0			0		0			0		0			0		0			0		0			0		0			0		0			0
	0			0		0			0		0			0		0			0		0			0		0			0		0			0		0			0		0			0		0			0
	0			0		0			0		0			0		0			0		0			0		0			0		0			0		0			0		0			0		0			0
	0			0		0			0		0			0		0			0		0			0		0			0		0			0		0			0		0			0		0			0
	0			0		0			0		0			0		0			0		0			0		0			0		0			0		0			0		0			0		0			0
	0			0		0			0		0			0		0			0		0			0		0			0		0			0		0			0		0			0		0			0
	0			0		0			0		0			0		0			0		0			0		0			0		0			0		0			0		0			0		0			0
	0			0		0			0		0			0		0			0		0			0		0			0		0			0		0			0		0			0		0			0
	0			0		0			0		0			0		0			0		0			0		0			0		0			0		0			0		0			0		0			0
	0			0		0			0		0			0		0			0		0			0		0			0		0			0		0			0		0			0		0			0
	0			0		0			0		0			0		0			0		0			0		0			0		0			0		0			0		0			0		0			0
	0			0		0			0		0			0		0			0		0			0		0			0		0			0		0			0		0			0		0			0
	0			0		0			0		0			0		0			0		0			0		0			0		0			0		0			0		0			0		0			0
	0			0		0			0		0			0		0			0		0			0		0			0		0			0		0			0		0			0		0			0
	0			0		0			0		0			0		0			0		0			0		0			0		0			0		0			0		0			0		0			0
	0			0		0			0		0			0		0			0		0			0		0			0		0			0		0			0		0			0		0			0
	0			0		0			0		0			0		0			0		0			0		0			0		0			0		0			0		0			0		0			0
	0			0		0			0		0			0		0			0		0			0		0			0		0			0		0			0		0			0		0			0
	0			0		0			0		0			0		0			0		0			0		0			0		0			0		0			0		0			0		0			0
	0			0		0			0		0			0		0			0		0			0		0			0		0			0		0			0		0			0		0			0
	0			0		0			0		0			0		0			0		0			0		0			0		0			0		0			0		0			0		0			0
	0			0		0			0		0			0		0			0		0			0		0			0		0			0		0			0		0			0		0			0
	0			0		0			0		0			0		0			0		0			0		0			0		0			0		0			0		0			0		0			0
	0			0		0			0		0			0		0			0		0			0		0			0		0			0		0			0		0			0		0			0
	0			0		0			0		0			0		0			0		0			0		0			0		0			0		0			0		0			0		0			0
	0			0		0			0		0			0		0			0		0			0		0			0		0			0		0			0		0			0		0			0
	0			0		0			0		0			0		0			0		0			0		0			0		0			0		0			0		0			0		0			0
	0			0		0			0		0			0		0			0		0			0		0			0		0			0		0			0		0			0		0			0
	0			0		0			0		0			0		0			0		0			0		0			0		0			0		0			0		0			0		0			0
	0			0		0			0		0			0		0			0		0			0		0			0		0			0		0			0		0			0		0			0
	0			0		0			0		0			0		0			0		0			0		0			0		0			0		0			0		0			0		0			0
	0			0		0			0		0			0		0			0		0			0		0			0		0			0		0			0		0			0		0			0
	0			0		0			0		0			0		0			0		0			0		0			0		0			0		0			0		0			0		0			0
	0			0		0			0		0			0		0			0		0			0		0			0		0			0		0			0		0			0		0			0
	0			0		0			0		0			0		0			0		0			0		0			0		0			0		0			0		0			0		0			0
	0			0		0			0		0			0		0			0		0			0		0			0		0			0		0			0		0			0		0			0
	0			0		0			0		0			0		0			0		0			0		0			0		0			0		0			0		0			0		0			0
	0			0		0			0		0			0		0			0		0			0		0			0		0			0		0			0		0			0		0			0
	0			0		0			0		0			0		0			0		0			0		0			0		0			0		0			0		0			0		0			0
	0			0		0			0		0			0		0			0		0			0		0			0		0			0		0			0		0			0		0			0
	0			0		0			0		0			0		0			0		0			0		0			0		0			0		0			0		0			0		0			0
	0			0		0			0		0			0		0			0		0			0		0			0		0			0		0			0		0			0		0			0
	0			0		0			0		0			0		0			0		0			0		0			0		0			0		0			0		0			0		0			0
	0			0		0			0		0			0		0			0		0			0		0			0		0			0		0			0		0			0		0			0
	0			0		0			0		0			0		0			0		0			0		0			0		0			0		0			0		0			0		0			0
	0			0		0			0		0			0		0			0		0			0		0			0		0			0		0			0		0			0		0			0
	0			0		0			0		0			0		0			0		0			0		0			0		0			0		0			0		0			0		0			0
	0			0		0			0		0			0		0			0		0			0		0			0		0			0		0			0		0			0		0			0
	0			0		0			0		0			0		0			0		0			0		0			0		0			0		0			0		0			0		0			0
	0			0		0			0		0			0		0			0		0			0		0			0		0			0		0			0		0			0		0			0
	0			0		0			0		0			0		0			0		0			0		0			0		0			0		0			0		0			0		0			0
	0			0		0			0		0			0		0			0		0			0		0			0		0			0		0			0		0			0		0			0
	0			0		0			0		0			0		0			0		0			0		0			0		0			0		0			0		0			0		0			0
	0			0		0			0		0			0		0			0		0			0		0			0		0			0		0			0		0			0		0			0
	0			0		0			0		0			0		0			0		0			0		0			0		0			0		0			0		0			0		0			0
	0			0		0			0		0			0		0			0		0			0		0			0		0			0		0			0		0			0		0			0
	0			0		0			0		0			0		0			0		0			0		0			0		0			0		0			0		0			0		0			0
	0			0		0			0		0			0		0			0		0			0		0			0		0			0		0			0		0			0		0			0
	0			0		0			0		0			0		0			0		0			0		0			0		0			0		0			0		0			0		0			0
	0			0		0			0		0			0		0			0		0			0		0			0		0			0		0			0		0			0		0			0
	0			0		0			0		0			0		0			0		0			0		0			0		0			0		0			0		0			0		0			0
	0			0		0			0		0			0		0			0		0			0		0			0		0			0		0			0		0			0		0			0
	0			0		0			0		0			0		0			0		0			0		0			0		0			0		0			0		0			0		0			0
	0			0		0			0		0			0		0			0		0			0		0			0		0			0		0			0		0			0		0			0
	0			0		0			0		0			0		0			0		0			0		0			0		0			0		0			0		0			0		0			0
	0			0		0			0		0			0		0			0		0			0		0			0		0			0		0			0		0			0		0			0
	0			0		0			0		0			0		0			0		0			0		0			0		0			0		0			0		0			0		0			0
	0			0		0			0		0			0		0			0		0			0		0			0		0			0		0			0		0			0		0			0
	0			0		0			0		0			0		0			0		0			0		0			0		0			0		0			0		0			0		0			0
	0			0		0			0		0			0		0			0		0			0		0			0		0			0		0			0		0			0		0			0
	0			0		0			0		0			0		0			0		0			0		0			0		0			0		0			0		0			0		0			0
	0			0		0			0		0			0		0			0		0			0		0			0		0			0		0			0		0			0		0			0
	0			0		0			0		0			0		0			0		0			0		0			0		0			0		0			0		0			0		0			0
	0			0		0			0		0			0		0			0		0			0		0			0		0			0		0			0		0			0		0			0
	0			0		0			0		0			0		0			0		0			0		0			0		0			0		0			0		0			0		0			0
	0			0		0			0		0			0		0			0		0			0		0			0		0			0		0			0		0			0		0			0
	0			0		0			0		0			0		0			0		0			0		0			0		0			0		0			0		0			0		0			0
	0			0		0			0		0			0		0			0		0			0		0			0		0			0		0			0		0			0		0			0
	0			0		0			0		0			0		0			0		0			0		0			0		0			0		0			0		0			0		0			0
	0			0		0			0		0			0		0			0		0			0		0			0		0			0		0			0		0			0		0			0
	0			0		0			0		0			0		0			0		0			0		0			0		0			0		0			0		0			0		0			0
	0			0		0			0		0			0		0			0		0			0		0			0		0			0		0			0		0			0		0			0
	0			0		0			0		0			0		0			0		0			0		0			0		0			0		0			0		0			0		0			0
	0			0		0			0		0			0		0			0		0			0		0			0		0			0		0			0		0			0		0			0
	0			0		0			0		0			0		0			0		0			0		0			0		0			0		0			0		0			0		0			0
	0			0		0			0		0			0		0			0		0			0		0			0		0			0		0			0		0			0		0			0
	0			0		0			0		0			0		0			0		0			0		0			0		0			0		0			0		0			0		0			0
	0			0		0			0		0			0		0			0		0			0		0			0		0			0		0			0		0			0		0			0
	0			0		0			0		0			0		0			0		0			0		0			0		0			0		0			0		0			0		0			0
	0			0		0			0		0			0		0			0		0			0		0			0		0			0		0			0		0			0		0			0
	0			0		0			0		0			0		0			0		0			0		0			0		0			0		0			0		0			0		0			0
	0			0		0			0		0			0		0			0		0			0		0			0		0			0		0			0		0			0		0			0
	0			0		0			0		0			0		0			0		0			0		0			0		0			0		0			0		0			0		0			0
	0			0		0			0		0			0		0			0		0			0		0			0		0			0		0			0		0			0		0			0
	0			0		0			0		0			0		0			0		0			0		0			0		0			0		0			0		0			0		0			0
	0			0		0			0		0			0		0			0		0			0		0			0		0			0		0			0		0			0		0			0
	0			0		0			0		0			0		0			0		0			0		0			0		0			0		0			0		0			0		0			0
	0			0		0			0		0			0		0			0		0			0		0			0		0			0		0			0		0			0		0			0
	0			0		0			0		0			0		0			0		0			0		0			0		0			0		0			0		0			0		0			0
	0			0		0			0		0			0		0			0		0			0		0			0		0			0		0			0		0			0		0			0
	0			0		0			0		0			0		0			0		0			0		0			0		0			0		0			0		0			0		0			0
	0			0		0			0		0			0		0			0		0			0		0			0		0			0		0			0		0			0		0			0
	0			0		0			0		0			0		0			0		0			0		0			0		0			0		0			0		0			0		0			0
	0			0		0			0		0			0		0			0		0			0		0			0		0			0		0			0		0			0		0			0
	0			0		0			0		0			0		0			0		0			0		0			0		0			0		0			0		0			0		0			0
	0			0		0			0		0			0		0			0		0			0		0			0		0			0		0			0		0			0		0			0
	0			0		0			0		0			0		0			0		0			0		0			0		0			0		0			0		0			0		0			0
	0			0		0			0		0			0		0			0		0			0		0			0		0			0		0			0		0			0		0			0
	0			0		0			0		0			0		0			0		0			0		0			0		0			0		0			0		0			0		0			0
	0			0		0			0		0			0		0			0		0			0		0			0		0			0		0			0		0			0		0			0
	0			0		0			0		0			0		0			0		0			0		0			0		0			0		0			0		0			0		0			0
	0			0		0			0		0			0		0			0		0			0		0			0		0			0		0			0		0			0		0			0
	0			0		0			0		0			0		0			0		0			0		0			0		0			0		0			0		0			0		0			0
	0			0		0			0		0			0		0			0		0			0		0			0		0			0		0			0		0			0		0			0
	0			0		0			0		0			0		0			0		0			0		0			0		0			0		0			0		0			0		0			0
	0			0		0			0		0			0		0			0		0			0		0			0		0			0		0			0		0			0		0			0
	0			0		0			0		0			0		0			0		0			0		0			0		0			0		0			0		0			0		0			0
	0			0		0			0		0			0		0			0		0			0		0			0		0			0		0			0		0			0		0			0
	0			0		0			0		0			0		0			0		0			0		0			0		0			0		0			0		0			0		0			0
	0			0		0			0		0			0		0			0		0			0		0			0		0			0		0			0		0			0		0			0
	0			0		0			0		0			0		0			0		0			0		0			0		0			0		0			0		0			0		0			0
	0			0		0			0		0			0		0			0		0			0		0			0		0			0		0			0		0			0		0			0
	0			0		0			0		0			0		0			0		0			0		0			0		0			0		0			0		0			0		0			0
	0			0		0			0		0			0		0			0		0			0		0			0		0			0		0			0		0			0		0			0
	0			0		0			0		0			0		0			0		0			0		0			0		0			0		0			0		0			0		0			0
	0			0		0			0		0			0		0			0		0			0		0			0		0			0		0			0		0			0		0			0
	0			0		0			0		0			0		0			0		0			0		0			0		0			0		0			0		0			0		0			0
	0			0		0			0		0			0		0			0		0			0		0			0		0			0		0			0		0			0		0			0
	0			0		0			0		0			0		0			0		0			0		0			0		0			0		0			0		0			0		0			0
	0			0		0			0		0			0		0			0		0			0		0			0		0			0		0			0		0			0		0			0
	0			0		0			0		0			0		0			0		0			0		0			0		0			0		0			0		0			0		0			0
	0			0		0			0		0			0		0			0		0			0		0			0		0			0		0			0		0			0		0			0
	0			0		0			0		0			0		0			0		0			0		0			0		0			0		0			0		0			0		0			0
	0			0		0			0		0			0		0			0		0			0		0			0		0			0		0			0		0			0		0			0
	0			0		0			0		0			0		0			0		0			0		0			0		0			0		0			0		0			0		0			0
	0			0		0			0		0			0		0			0		0			0		0			0		0			0		0			0		0			0		0			0
	0			0		0			0		0			0		0			0		0			0		0			0		0			0		0			0		0			0		0			0
	0			0		0			0		0			0		0			0		0			0		0			0		0			0		0			0		0			0		0			0
	0			0		0			0		0			0		0			0		0			0		0			0		0			0		0			0		0			0		0			0
	0			0		0			0		0			0		0			0		0			0		0			0		0			0		0			0		0			0		0			0
	0			0		0			0		0			0		0			0		0			0		0			0		0			0		0			0		0			0		0			0
	0			0		0			0		0			0		0			0		0			0		0			0		0			0		0			0		0			0		0			0
	0			0		0			0		0			0		0			0		0			0		0			0		0			0		0			0		0			0		0			0
	0			0		0			0		0			0		0			0		0			0		0			0		0			0		0			0		0			0		0			0
	0			0		0			0		0			0		0			0		0			0		0			0		0			0		0			0		0			0		0			0
	0			0		0			0		0			0		0			0		0			0		0			0		0			0		0			0		0			0		0			0
	0			0		0			0		0			0		0			0		0			0		0			0		0			0		0			0		0			0		0			0
	0			0		0			0		0			0		0			0		0			0		0			0		0			0		0			0		0			0		0			0
	0			0		0			0		0			0		0			0		0			0		0			0		0			0		0			0		0			0		0			0
	0			0		0			0		0			0		0			0		0			0		0			0		0			0		0			0		0			0		0			0
	0			0		0			0		0			0		0			0		0			0		0			0		0			0		0			0		0			0		0			0
	0			0		0			0		0			0		0			0		0			0		0			0		0			0		0			0		0			0		0			0
	0			0		0			0		0			0		0			0		0			0		0			0		0			0		0			0		0			0		0			0
	0			0		0			0		0			0		0			0		0			0		0			0		0			0		0			0		0			0		0			0
	0			0		0			0		0			0		0			0		0			0		0			0		0			0		0			0		0			0		0			0
	0			0		0			0		0			0		0			0		0			0		0			0		0			0		0			0		0			0		0			0
	0			0		0			0		0			0		0			0		0			0		0			0		0			0		0			0		0			0		0			0
	0			0		0			0		0			0		0			0		0			0		0			0		0			0		0			0		0			0		0			0
	0			0		0			0		0			0		0			0		0			0		0			0		0			0		0			0		0			0		0			0
	0			0		0			0		0			0		0			0		0			0		0			0		0			0		0			0		0			0		0			0
	0			0		0			0		0			0		0			0		0			0		0			0		0			0		0			0		0			0		0			0
	0			0		0			0		0			0		0			0		0			0		0			0		0			0		0			0		0			0		0			0
	0			0		0			0		0			0		0			0		0			0		0			0		0			0		0			0		0			0		0			0
	0			0		0			0		0			0		0			0		0			0		0			0		0			0		0			0		0			0		0			0
	0			0		0			0		0			0		0			0		0			0		0			0		0			0		0			0		0			0		0			0
	0			0		0			0		0			0		0			0		0			0		0			0		0			0		0			0		0			0		0			0
	0			0		0			0		0			0		0			0		0			0		0			0		0			0		0			0		0			0		0			0
	0			0		0			0		0			0		0			0		0			0		0			0		0			0		0			0		0			0		0			0
	0			0		0			0		0			0		0			0		0			0		0			0		0			0		0			0		0			0		0			0
	0			0		0			0		0			0		0			0		0			0		0			0		0			0		0			0		0			0		0			0
	0			0		0			0		0			0		0			0		0			0		0			0		0			0		0			0		0			0		0			0
	0			0		0			0		0			0		0			0		0			0		0			0		0			0		0			0		0			0		0			0
	0			0		0			0		0			0		0			0		0			0		0			0		0			0		0			0		0			0		0			0
	0			0		0			0		0			0		0			0		0			0		0			0		0			0		0			0		0			0		0			0
	0			0		0			0		0			0		0			0		0			0		0			0		0			0		0			0		0			0		0			0
	0			0		0			0		0			0		0			0		0			0		0			0		0			0		0			0		0			0		0			0
	0			0		0			0		0			0		0			0		0			0		0			0		0			0		0			0		0			0		0			0
	0			0		0			0		0			0		0			0		0			0		0			0		0			0		0			0		0			0		0			0
	0			0		0			0		0			0		0			0		0			0		0			0		0			0		0			0		0			0		0			0
	0			0		0			0		0			0		0			0		0			0		0			0		0			0		0			0		0			0		0			0
	0			0		0			0		0			0		0			0		0			0		0			0		0			0		0			0		0			0		0			0
	0			0		0			0		0			0		0			0		0			0		0			0		0			0		0			0		0			0		0			0
	0			0		0			0		0			0		0			0		0			0		0			0		0			0		0			0		0			0		0			0
	0			0		0			0		0			0		0			0		0			0		0			0		0			0		0			0		0			0		0			0
	0			0		0			0		0			0		0			0		0			0		0			0		0			0		0			0		0			0		0			0
	0			0		0			0		0			0		0			0		0			0		0			0		0			0		0			0		0			0		0			0
	0			0		0			0		0			0		0			0		0			0		0			0		0			0		0			0		0			0		0			0
	0			0		0			0		0			0		0			0		0			0		0			0		0			0		0			0		0			0		0			0
	0			0		0			0		0			0		0			0		0			0		0			0		0			0		0			0		0			0		0			0
	0			0		0			0		0			0		0			0		0			0		0			0		0			0		0			0		0			0		0			0
	0			0		0			0		0			0		0			0		0			0		0			0		0			0		0			0		0			0		0			0
	0			0		0			0		0			0		0			0		0			0		0			0		0			0		0			0		0			0		0			0
	0			0		0			0		0			0		0			0		0			0		0			0		0			0		0			0		0			0		0			0
	0			0		0			0		0			0		0			0		0			0		0			0		0			0		0			0		0			0		0			0
	0			0		0			0		0			0		0			0		0			0		0			0		0			0		0			0		0			0		0			0
	0			0		0			0		0			0		0			0		0			0		0			0		0			0		0			0		0			0		0			0
	0			0		0			0		0			0		0			0		0			0		0			0		0			0		0			0		0			0		0			0
	0			0		0			0		0			0		0			0		0			0		0			0		0			0		0			0		0			0		0			0
	0			0		0			0		0			0		0			0		0			0		0			0		0			0		0			0		0			0		0			0
	0			0		0			0		0			0		0			0		0			0		0			0		0			0		0			0		0			0		0			0
	0			0		0			0		0			0		0			0		0			0		0			0		0			0		0			0		0			0		0			0
	0			0		0			0		0			0		0			0		0			0		0			0		0			0		0			0		0			0		0			0
	0			0		0			0		0			0		0			0		0			0		0			0		0			0		0			0		0			0		0			0
	0			0		0			0		0			0		0			0		0			0		0			0		0			0		0			0		0			0		0			0
	0			0		0			0		0			0		0			0		0			0		0			0		0			0		0			0		0			0		0			0
	0			0		0			0		0			0		0			0		0			0		0			0		0			0		0			0		0			0		0			0
	0			0		0			0		0			0		0			0		0			0		0			0		0			0		0			0		0			0		0			0
	0			0		0			0		0			0		0			0		0			0		0			0		0			0		0			0		0			0		0			0
	0			0		0			0		0			0		0			0		0			0		0			0		0			0		0			0		0			0		0			0
	0			0		0			0		0			0		0			0		0			0		0			0		0			0		0			0		0			0		0			0
	0			0		0			0		0			0		0			0		0			0		0			0		0			0		0			0		0			0		0			0
	0			0		0			0		0			0		0			0		0			0		0			0		0			0		0			0		0			0		0			0
	0			0		0			0		0			0		0			0		0			0		0			0		0			0		0			0		0			0		0			0
	0			0		0			0		0			0		0			0		0			0		0			0		0			0		0			0		0			0		0			0
	0			0		0			0		0			0		0			0		0			0		0			0		0			0		0			0		0			0		0			0
	0			0		0			0		0			0		0			0		0			0		0			0		0			0		0			0		0			0		0			0
	0			0		0			0		0			0		0			0		0			0		0			0		0			0		0			0		0			0		0			0
	0			0		0			0		0			0		0			0		0			0		0			0		0			0		0			0		0			0		0			0
	0			0		0			0		0			0		0			0		0			0		0			0		0			0		0			0		0			0		0			0
	0			0		0			0		0			0		0			0		0			0		0			0		0			0		0			0		0			0		0			0
	0			0		0			0		0			0		0			0		0			0		0			0		0			0		0			0		0			0		0			0
	0			0		0			0		0			0		0			0		0			0		0			0		0			0		0			0		0			0		0			0
	0			0		0			0		0			0		0			0		0			0		0			0		0			0		0			0		0			0		0			0
	0			0		0			0		0			0		0			0		0			0		0			0		0			0		0			0		0			0		0			0
	0			0		0			0		0			0		0			0		0			0		0			0		0			0		0			0		0			0		0			0
	0			0		0			0		0			0		0			0		0			0		0			0		0			0		0			0		0			0		0			0
	0			0		0			0		0			0		0			0		0			0		0			0		0			0		0			0		0			0		0			0
	0			0		0			0		0			0		0			0		0			0		0			0		0			0		0			0		0			0		0			0
	0			0		0			0		0			0		0			0		0			0		0			0		0			0		0			0		0			0		0			0
	0			0		0			0		0			0		0			0		0			0		0			0		0			0		0			0		0			0		0			0
	0			0		0			0		0			0		0			0		0			0		0			0		0			0		0			0		0			0		0			0
	0			0		0			0		0			0		0			0		0			0		0			0		0			0		0			0		0			0		0			0
	0			0		0			0		0			0		0			0		0			0		0			0		0			0		0			0		0			0		0			0
	0			0		0			0		0			0		0			0		0			0		0			0		0			0		0			0		0			0		0			0
	0			0		0			0		0			0		0			0		0			0		0			0		0			0		0			0		0			0		0			0
	0			0		0			0		0			0		0			0		0			0		0			0		0			0		0			0		0			0		0			0
	0			0		0			0		0			0		0			0		0			0		0			0		0			0		0			0		0			0		0			0
	0			0		0			0		0			0		0			0		0			0		0			0		0			0		0			0		0			0		0			0
	0			0		0			0		0			0		0			0		0			0		0			0		0			0		0			0		0			0		0			0
	0			0		0			0		0			0		0			0		0			0		0			0		0			0		0			0		0			0		0			0
	0			0		0			0		0			0		0			0		0			0		0			0		0			0		0			0		0			0		0			0
	0			0		0			0		0			0		0			0		0			0		0			0		0			0		0			0		0			0		0			0
	0			0		0			0		0			0		0			0		0			0		0			0		0			0		0			0		0			0		0			0
	0			0		0			0		0			0		0			0		0			0		0			0		0			0		0			0		0			0		0			0
	0			0		0			0		0			0		0			0		0			0		0			0		0			0		0			0		0			0		0			0
	0			0		0			0		0			0		0			0		0			0		0			0		0			0		0			0		0			0		0			0
	0			0		0			0		0			0		0			0		0			0		0			0		0			0		0			0		0			0		0			0
	0			0		0			0		0			0		0			0		0			0		0			0		0			0		0			0		0			0		0			0
	0			0		0			0		0			0		0			0		0			0		0			0		0			0		0			0		0			0		0			0
	0			0		0			0		0			0		0			0		0			0		0			0		0			0		0			0		0			0		0			0
	0			0		0			0		0			0		0			0		0			0		0			0		0			0		0			0		0			0		0			0
	0			0		0			0		0			0		0			0		0			0		0			0		0			0		0			0		0			0		0			0
	0			0		0			0		0			0		0			0		0			0		0			0		0			0		0			0		0			0		0			0
	0			0		0			0		0			0		0			0		0			0		0			0		0			0		0			0		0			0		0			0
	0			0		0			0		0			0		0			0		0			0		0			0		0			0		0			0		0			0		0			0
	0			0		0			0		0			0		0			0		0			0		0			0		0			0		0			0		0			0		0			0
	0			0		0			0		0			0		0			0		0			0		0			0		0			0		0			0		0			0		0			0
	0			0		0			0		0			0		0			0		0			0		0			0		0			0		0			0		0			0		0			0
	0			0		0			0		0			0		0			0		0			0		0			0		0			0		0			0		0			0		0			0
	0			0		0			0		0			0		0			0		0			0		0			0		0			0		0			0		0			0		0			0
	0			0		0			0		0			0		0			0		0			0		0			0		0			0		0			0		0			0		0			0
	0			0		0			0		0			0		0			0		0			0		0			0		0			0		0			0		0			0		0			0
	0			0		0			0		0			0		0			0		0			0		0			0		0			0		0			0		0			0		0			0
	0			0		0			0		0			0		0			0		0			0		0			0		0			0		0			0		0			0		0			0
	0			0		0			0		0			0		0			0		0			0		0			0		0			0		0			0		0			0		0			0
	0			0		0			0		0			0		0			0		0			0		0			0		0			0		0			0		0			0		0			0
	0			0		0			0		0			0		0			0		0			0		0			0		0			0		0			0		0			0		0			0
	0			0		0			0		0			0		0			0		0			0		0			0		0			0		0			0		0			0		0			0
	0			0		0			0		0			0		0			0		0			0		0			0		0			0		0			0		0			0		0			0
	0			0		0			0		0			0		0			0		0			0		0			0		0			0		0			0		0			0		0			0
	0			0		0			0		0			0		0			0		0			0		0			0		0			0		0			0		0			0		0			0
	0			0		0			0		0			0		0			0		0			0		0			0		0			0		0			0		0			0		0			0
	0			0		0			0		0			0		0			0		0			0		0			0		0			0		0			0		0			0		0			0
	0			0		0			0		0			0		0			0		0			0		0			0		0			0		0			0		0			0		0			0
	0			0		0			0		0			0		0			0		0			0		0			0		0			0		0			0		0			0		0			0
	0			0		0			0		0			0		0			0		0			0		0			0		0			0		0			0		0			0		0			0
	0			0		0			0		0			0		0			0		0			0		0			0		0			0		0			0		0			0		0			0
	0			0		0			0		0			0		0			0		0			0		0			0		0			0		0			0		0			0		0			0
	0			0		0			0		0			0		0			0		0			0		0			0		0			0		0			0		0			0		0			0
	0			0		0			0		0			0		0			0		0			0		0			0		0			0		0			0		0			0		0			0
	0			0		0			0		0			0		0			0		0			0		0			0		0			0		0			0		0			0		0			0
	0			0		0			0		0			0		0			0		0			0		0			0		0			0		0			0		0			0		0			0
	0			0		0			0		0			0		0			0		0			0		0			0		0			0		0			0		0			0		0			0
	0			0		0			0		0			0		0			0		0			0		0			0		0			0		0			0		0			0		0			0
	0			0		0			0		0			0		0			0		0			0		0			0		0			0		0			0		0			0		0			0
	0			0		0			0		0			0		0			0		0			0		0			0		0			0		0			0		0			0		0			0
	0			0		0			0		0			0		0			0		0			0		0			0		0			0		0			0		0			0		0			0
	0			0		0			0		0			0		0			0		0			0		0			0		0			0		0			0		0			0		0			0
	0			0		0			0		0			0		0			0		0			0		0			0		0			0		0			0		0			0		0			0
	0			0		0			0		0			0		0			0		0			0		0			0		0			0		0			0		0			0		0			0
	0			0		0			0		0			0		0			0		0			0		0			0		0			0		0			0		0			0		0			0
	0			0		0			0		0			0		0			0		0			0		0			0		0			0		0			0		0			0		0			0
	0			0		0			0		0			0		0			0		0			0		0			0		0			0		0			0		0			0		0			0
	0			0		0			0		0			0		0			0		0			0		0			0		0			0		0			0		0			0		0			0
	0			0		0			0		0			0		0			0		0			0		0			0		0			0		0			0		0			0		0			0
	0			0		0			0		0			0		0			0		0			0		0			0		0			0		0			0		0			0		0			0
	0			0		0			0		0			0		0			0		0			0		0			0		0			0		0			0		0			0		0			0
	0			0		0			0		0			0		0			0		0			0		0			0		0			0		0			0		0			0		0			0
	0			0		0			0		0			0		0			0		0			0		0			0		0			0		0			0		0			0		0			0
	0			0		0			0		0			0		0			0		0			0		0			0		0			0		0			0		0			0		0			0
	0			0		0			0		0			0		0			0		0			0		0			0		0			0		0			0		0			0		0			0
	0			0		0			0		0			0		0			0		0			0		0			0		0			0		0			0		0			0		0			0
	0			0		0			0		0			0		0			0		0			0		0			0		0			0		0			0		0			0		0			0
	0			0		0			0		0			0		0			0		0			0		0			0		0			0		0			0		0			0		0			0
	0			0		0			0		0			0		0			0		0			0		0			0		0			0		0			0		0			0		0			0
	0			0		0			0		0			0		0			0		0			0		0			0		0			0		0			0		0			0		0			0
	0			0		0			0		0			0		0			0		0			0		0			0		0			0		0			0		0			0		0			0
	0			0		0			0		0			0		0			0		0			0		0			0		0			0		0			0		0			0		0			0
	0			0		0			0		0			0		0			0		0			0		0			0		0			0		0			0		0			0		0			0
	0			0		0			0		0			0		0			0		0			0		0			0		0			0		0			0		0			0		0			0
	0			0		0			0		0			0		0			0		0			0		0			0		0			0		0			0		0			0		0			0
	0			0		0			0		0			0		0			0		0			0		0			0		0			0		0			0		0			0		0			0
	0			0		0			0		0			0		0			0		0			0		0			0		0			0		0			0		0			0		0			0
	0			0		0			0		0			0		0			0		0			0		0			0		0			0		0			0		0			0		0			0
	0			0		0			0		0			0		0			0		0			0		0			0		0			0		0			0		0			0		0			0
	0			0		0			0		0			0		0			0		0			0		0			0		0			0		0			0		0			0		0			0
	0			0		0			0		0			0		0			0		0			0		0			0		0			0		0			0		0			0		0			0
	0			0		0			0		0			0		0			0		0			0		0			0		0			0		0			0		0			0		0			0
	0			0		0			0		0			0		0			0		0			0		0			0		0			0		0			0		0			0		0			0
	0			0		0			0		0			0		0			0		0			0		0			0		0			0		0			0		0			0		0			0
	0			0		0			0		0			0		0			0		0			0		0			0		0			0		0			0		0			0		0			0
	0			0		0			0		0			0		0			0		0			0		0			0		0			0		0			0		0			0		0			0
	0			0		0			0		0			0		0			0		0			0		0			0		0			0		0			0		0			0		0			0
	0			0		0			0		0			0		0			0		0			0		0			0		0			0		0			0		0			0		0			0
	0			0		0			0		0			0		0			0		0			0		0			0		0			0		0			0		0			0		0			0
	0			0		0			0		0			0		0			0		0			0		0			0		0			0		0			0		0			0		0			0
	0			0		0			0		0			0		0			0		0			0		0			0		0			0		0			0		0			0		0			0
	0			0		0			0		0			0		0			0		0			0		0			0		0			0		0			0		0			0		0			0
	0			0		0			0		0			0		0			0		0			0		0			0		0			0		0			0		0			0		0			0
	0			0		0			0		0			0		0			0		0			0		0			0		0			0		0			0		0			0		0			0
	0			0		0			0		0			0		0			0		0			0		0			0		0			0		0			0		0			0		0			0
	0			0		0			0		0			0		0			0		0			0		0			0		0			0		0			0		0			0		0			0
	0			0		0			0		0			0		0			0		0			0		0			0		0			0		0			0		0			0		0			0
	0			0		0			0		0			0		0			0		0			0		0			0		0			0		0			0		0			0		0			0
	0			0		0			0		0			0		0			0		0			0		0			0		0			0		0			0		0			0		0			0
	0			0		0			0		0			0		0			0		0			0		0			0		0			0		0			0		0			0		0			0
	0			0		0			0		0			0		0			0		0			0		0			0		0			0		0			0		0			0		0			0
	0			0		0			0		0			0		0			0		0			0		0			0		0			0		0			0		0			0		0			0
	0			0		0			0		0			0		0			0		0			0		0			0		0			0		0			0		0			0		0			0
	0			0		0			0		0			0		0			0		0			0		0			0		0			0		0			0		0			0		0			0
	0			0		0			0		0			0		0			0		0			0		0			0		0			0		0			0		0			0		0			0
	0			0		0			0		0			0		0			0		0			0		0			0		0			0		0			0		0			0		0			0
	0			0		0			0		0			0		0			0		0			0		0			0		0			0		0			0		0			0		0			0
	0			0		0			0		0			0		0			0		0			0		0			0		0			0		0			0		0			0		0			0
	0			0		0			0		0			0		0			0		0			0		0			0		0			0		0			0		0			0		0			0
	0			0		0			0		0			0		0			0		0			0		0			0		0			0		0			0		0			0		0			0
	0			0		0			0		0			0		0			0		0			0		0			0		0			0		0			0		0			0		0			0
	0			0		0			0		0			0		0			0		0			0		0			0		0			0		0			0		0			0		0			0
	0			0		0			0		0			0		0			0		0			0		0			0		0			0		0			0		0			0		0			0
	0			0		0			0		0			0		0			0		0			0		0			0		0			0		0			0		0			0		0			0
	0			0		0			0		0			0		0			0		0			0		0			0		0			0		0			0		0			0		0			0
	0			0		0			0		0			0		0			0		0			0		0			0		0			0		0			0		0			0		0			0
	0			0		0			0		0			0		0			0		0			0		0			0		0			0		0			0		0			0		0			0
	0			0		0			0		0			0		0			0		0			0		0			0		0			0		0			0		0			0		0			0
	0			0		0			0		0			0		0			0		0			0		0			0		0			0		0			0		0			0		0			0
	0			0		0			0		0			0		0			0		0			0		0			0		0			0		0			0		0			0		0			0
	0			0		0			0		0			0		0			0		0			0		0			0		0			0		0			0		0			0		0			0
	0			0		0			0		0			0		0			0		0			0		0			0		0			0		0			0		0			0		0			0
	0			0		0			0		0			0		0			0		0			0		0			0		0			0		0			0		0			0		0			0
	0			0		0			0		0			0		0			0		0			0		0			0		0			0		0			0		0			0		0			0
	0			0		0			0		0			0		0			0		0			0		0			0		0			0		0			0		0			0		0			0
	0			0		0			0		0			0		0			0		0			0		0			0		0			0		0			0		0			0		0			0
	0			0		0			0		0			0		0			0		0			0		0			0		0			0		0			0		0			0		0			0
	0			0		0			0		0			0		0			0		0			0		0			0		0			0		0			0		0			0		0			0
	0			0		0			0		0			0		0			0		0			0		0			0		0			0		0			0		0			0		0			0
	0			0		0			0		0			0		0			0		0			0		0			0		0			0		0			0		0			0		0			0
	0			0		0			0		0			0		0			0		0			0		0			0		0			0		0			0		0			0		0			0
	0			0		0			0		0			0		0			0		0			0		0			0		0			0		0			0		0			0		0			0
	0			0		0			0		0			0		0			0		0			0		0			0		0			0		0			0		0			0		0			0
	0			0		0			0		0			0		0			0		0			0		0			0		0			0		0			0		0			0		0			0
	0			0		0			0		0			0		0			0		0			0		0			0		0			0		0			0		0			0		0			0
	0			0		0			0		0			0		0			0		0			0		0			0		0			0		0			0		0			0		0			0
	0			0		0			0		0			0		0			0		0			0		0			0		0			0		0			0		0			0		0			0
	0			0		0			0		0			0		0			0		0			0		0			0		0			0		0			0		0			0		0			0
	0			0		0			0		0			0		0			0		0			0		0			0		0			0		0			0		0			0		0			0
	0			0		0			0		0			0		0			0		0			0		0			0		0			0		0			0		0			0		0			0
	0			0		0			0		0			0		0			0		0			0		0			0		0			0		0			0		0			0		0			0
	0			0		0			0		0			0		0			0		0			0		0			0		0			0		0			0		0			0		0			0
	0			0		0			0		0			0		0			0		0			0		0			0		0			0		0			0		0			0		0			0
	0			0		0			0		0			0		0			0		0			0		0			0		0			0		0			0		0			0		0			0
	0			0		0			0		0			0		0			0		0			0		0			0		0			0		0			0		0			0		0			0
	0			0		0			0		0			0		0			0		0			0		0			0		0			0		0			0		0			0		0			0
	0			0		0			0		0			0		0			0		0			0		0			0		0			0		0			0		0			0		0			0
	0			0		0			0		0			0		0			0		0			0		0			0		0			0		0			0		0			0		0			0
	0			0		0			0		0			0		0			0		0			0		0			0		0			0		0			0		0			0		0			0
	0			0		0			0		0			0		0			0		0			0		0			0		0			0		0			0		0			0		0			0
	0			0		0			0		0			0		0			0		0			0		0			0		0			0		0			0		0			0		0			0
	0			0		0			0		0			0		0			0		0			0		0			0		0			0		0			0		0			0		0			0
	0			0		0			0		0			0		0			0		0			0		0			0		0			0		0			0		0			0		0			0
	0			0		0			0		0			0		0			0		0			0		0			0		0			0		0			0		0			0		0			0
	0			0		0			0		0			0		0			0		0			0		0			0		0			0		0			0		0			0		0			0
	0			0		0			0		0			0		0			0		0			0		0			0		0			0		0			0		0			0		0			0
	0			0		0			0		0			0		0			0		0			0		0			0		0			0		0			0		0			0		0			0
	0			0		0			0		0			0		0			0		0			0		0			0		0			0		0			0		0			0		0			0
	0			0		0			0		0			0		0			0		0			0		0			0		0			0		0			0		0			0		0			0
	0			0		0			0		0			0		0			0		0			0		0			0		0			0		0			0		0			0		0			0
	0			0		0			0		0			0		0			0		0			0		0			0		0			0		0			0		0			0		0			0
	0			0		0			0		0			0		0			0		0			0		0			0		0			0		0			0		0			0		0			0
	0			0		0			0		0			0		0			0		0			0		0			0		0			0		0			0		0			0		0			0
	0			0		0			0		0			0		0			0		0			0		0			0		0			0		0			0		0			0		0			0
	0			0		0			0		0			0		0			0		0			0		0			0		0			0		0			0		0			0		0			0
	0			0		0			0		0			0		0			0		0			0		0			0		0			0		0			0		0			0		0			0
	0			0		0			0		0			0		0			0		0			0		0			0		0			0		0			0		0			0		0			0
	0			0		0			0		0			0		0			0		0			0		0			0		0			0		0			0		0			0		0			0
	0			0		0			0		0			0		0			0		0			0		0			0		0			0		0			0		0			0		0			0
	0			0		0			0		0			0		0			0		0			0		0			0		0			0		0			0		0			0		0			0
	0			0		0			0		0			0		0			0		0			0		0			0		0			0		0			0		0			0		0			0
	0			0		0			0		0			0		0			0		0			0		0			0		0			0		0			0		0			0		0			0
	0			0		0			0		0			0		0			0		0			0		0			0		0			0		0			0		0			0		0			0
	0			0		0			0		0			0		0			0		0			0		0			0		0			0		0			0		0			0		0			0
	0			0		0			0		0			0		0			0		0			0		0			0		0			0		0			0		0			0		0			0
	0			0		0			0		0			0		0			0		0			0		0			0		0			0		0			0		0			0		0			0
	0			0		0			0		0			0		0			0		0			0		0			0		0			0		0			0		0			0		0			0
	0			0		0			0		0			0		0			0		0			0		0			0		0			0		0			0		0			0		0			0
	0			0		0			0		0			0		0			0		0			0		0			0		0			0		0			0		0			0		0			0
	0			0		0			0		0			0		0			0		0			0		0			0		0			0		0			0		0			0		0			0
	0			0		0			0		0			0		0			0		0			0		0			0		0			0		0			0		0			0		0			0
	0			0		0			0		0			0		0			0		0			0		0			0		0			0		0			0		0			0		0			0
	0			0		0			0		0			0		0			0		0			0		0			0		0			0		0			0		0			0		0			0
	0			0		0			0		0			0		0			0		0			0		0			0		0			0		0			0		0			0		0			0
	0			0		0			0		0			0		0			0		0			0		0			0		0			0		0			0		0			0		0			0
	0			0		0			0		0			0		0			0		0			0		0			0		0			0		0			0		0			0		0			0
	0			0		0			0		0			0		0			0		0			0		0			0		0			0		0			0		0			0		0			0
	0			0		0			0		0			0		0			0		0			0		0			0		0			0		0			0		0			0		0			0
	0			0		0			0		0			0		0			0		0			0		0			0		0			0		0			0		0			0		0			0
	0			0		0			0		0			0		0			0		0			0		0			0		0			0		0			0		0			0		0			0
	0			0		0			0		0			0		0			0		0			0		0			0		0			0		0			0		0			0		0			0
	0			0		0			0		0			0		0			0		0			0		0			0		0			0		0			0		0			0		0			0
	0			0		0			0		0			0		0			0		0			0		0			0		0			0		0			0		0			0		0			0
	0			0		0			0		0			0		0			0		0			0		0			0		0			0		0			0		0			0		0			0
	0			0		0			0		0			0		0			0		0			0		0			0		0			0		0			0		0			0		0			0
	0			0		0			0		0			0		0			0		0			0		0			0		0			0		0			0		0			0		0			0
	0			0		0			0		0			0		0			0		0			0		0			0		0			0		0			0		0			0		0			0
	0			0		0			0		0			0		0			0		0			0		0			0		0			0		0			0		0			0		0			0
	0			0		0			0		0			0		0			0		0			0		0			0		0			0		0			0		0			0		0			0
	0			0		0			0		0			0		0			0		0			0		0			0		0			0		0			0		0			0		0			0
	0			0		0			0		0			0		0			0		0			0		0			0		0			0		0			0		0			0		0			0
	0			0		0			0		0			0		0			0		0			0		0			0		0			0		0			0		0			0		0			0
	0			0		0			0		0			0		0			0		0			0		0			0		0			0		0			0		0			0		0			0
	0			0		0			0		0			0		0			0		0			0		0			0		0			0		0			0		0			0		0			0
	0			0		0			0		0			0		0			0		0			0		0			0		0			0		0			0		0			0		0			0
	0			0		0			0		0			0		0			0		0			0		0			0		0			0		0			0		0			0		0			0
	0			0		0			0		0			0		0			0		0			0		0			0		0			0		0			0		0			0		0			0
	0			0		0			0		0			0		0			0		0			0		0			0		0			0		0			0		0			0		0			0
	0			0		0			0		0			0		0			0		0			0		0			0		0			0		0			0		0			0		0			0
	0			0		0			0		0			0		0			0		0			0		0			0		0			0		0			0		0			0		0			0
	0			0		0			0		0			0		0			0		0			0		0			0		0			0		0			0		0			0		0			0
	0			0		0			0		0			0		0			0		0			0		0			0		0			0		0			0		0			0		0			0
	0			0		0			0		0			0		0			0		0			0		0			0		0			0		0			0		0			0		0			0
	0			0		0			0		0			0		0			0		0			0		0			0		0			0		0			0		0			0		0			0
	0			0		0			0		0			0		0			0		0			0		0			0		0			0		0			0		0			0		0			0
	0			0		0			0		0			0		0			0		0			0		0			0		0			0		0			0		0			0		0			0
	0			0		0			0		0			0		0			0		0			0		0			0		0			0		0			0		0			0		0			0
	0			0		0			0		0			0		0			0		0			0		0			0		0			0		0			0		0			0		0			0
	0			0		0			0		0			0		0			0		0			0		0			0		0			0		0			0		0			0		0			0
	0			0		0			0		0			0		0			0		0			0		0			0		0			0		0			0		0			0		0			0
	0			0		0			0		0			0		0			0		0			0		0			0		0			0		0			0		0			0		0			0
	0			0		0			0		0			0		0			0		0			0		0			0		0			0		0			0		0			0		0			0
	0			0		0			0		0			0		0			0		0			0		0			0		0			0		0			0		0			0		0			0
	0			0		0			0		0			0		0			0		0			0		0			0		0			0		0			0		0			0		0			0
	0			0		0			0		0			0		0			0		0			0		0			0		0			0		0			0		0			0		0			0
	0			0		0			0		0			0		0			0		0			0		0			0		0			0		0			0		0			0		0			0
	0			0		0			0		0			0		0			0		0			0		0			0		0			0		0			0		0			0		0			0
	0			0		0			0		0			0		0			0		0			0		0			0		0			0		0			0		0			0		0			0
	0			0		0			0		0			0		0			0		0			0		0			0		0			0		0			0		0			0		0			0

## Sheet: raw data subst. glass full AB
		201-01-31 SUBSTRATE prim T cell full AB cell 1-1					201-01-31 SUBSTRATE prim T cell full AB cell 2-1					201-01-31 SUBSTRATE prim T cell full AB cell 3-1					201-01-31 SUBSTRATE prim T cell full AB cell 4-1					201-01-31 SUBSTRATE prim T cell full AB cell 5-1					201-02-22 SUBSTRATE prim T cell full AB cell 1-1					201-02-22 SUBSTRATE prim T cell full AB cell 2-1					201-02-22 SUBSTRATE prim T cell full AB cell 3-1					201-03-14 SUBSTRATE prim T cell full AB cell 3-1					201-03-14 SUBSTRATE prim T cell full AB cell 4-1
		Average	0.732593				Average	430.541				Average	396.147				Average	420.887				Average	0.599111				Average	458.213				Average	611.089				Average	485.376				Average	0.850652				Average	0.897718
		StDev	0.252191				StDev	122.976				StDev	131.076				StDev	95.274				StDev	0.12704				StDev	117.185				StDev	133.742				StDev	120.129				StDev	0.236309				StDev	0.306987
				setp					setp					setp					setp					setp					setp					setp					setp					setp					setp
		MPa	%				kPa	%				kPa	%				kPa	%				MPa	%				kPa	%				kPa	%				kPa	%				MPa	%				MPa	%
	0	0	0.202429	0.00108642		0	0	0.136799	253.578		0	0	0.356506	559.474		0	0	0.0757576	134.202		0	0	0.0277778	9.97039e-05		0	0	0.217391	456.434		0	0	0.125156	467.371		0	0	0.13587	320.096		0	0	0.333333	0.00241203		0	0	1.19048	0.00959403
	0	0.00297628	0	0		0	1.62059	0	0		0	1.58943	0	0		0	1.8855	0	0		0	0.00208807	0	0		0	1.7904	0	0		0	1.95482	0	0		0	1.80867	0	0		0	0.0027723	0	0		0	0.00314005	0	0
	0	0.00595256	0	0		0	3.24119	0	0		0	3.17885	0	0		0	3.77099	0	0		0	0.00417614	0	0		0	3.5808	0	0		0	3.90964	0	0		0	3.61733	0	0		0	0.0055446	0	0		0	0.0062801	0	0
	0	0.00892884	0	0		0	4.86178	0	0		0	4.76828	0	0		0	5.65649	0	0		0	0.00626421	0	0		0	5.37119	0	0		0	5.86447	0	0		0	5.426	0	0		0	0.0083169	0	0		0	0.00942016	0	0
	0	0.0119051	0	0		0	6.48237	0	0		0	6.35771	0	0		0	7.54199	0	0		0	0.00835228	0	0		0	7.16159	0	0		0	7.81929	0	0		0	7.23467	0	0		0	0.0110892	0	0		0	0.0125602	0	0
	0	0.0148814	0	0		0	8.10296	0	0		0.014166	7.94714	0.178253	268.626		0	9.42749	0	0		0	0.0104404	0	0		0	8.95199	0	0		0	9.77411	0	0		0.0122871	9.04334	0.13587	308.279		0	0.0138615	0	0		0	0.0157003	0	0
	0	0.0178577	0	0		0	9.72356	0	0		0	9.53656	0	0		0	11.313	0	0		0	0.0125284	0	0		0	10.7424	0	0		0	11.7289	0	0		0	10.852	0	0		0	0.0166338	0	0		0	0.0188403	0	0
	0	0.020834	0	0		0	11.3442	0	0		0	11.126	0	0		0	13.1985	0	0		0	0.0146165	0	0		0	12.5328	0	0		0	13.6837	0	0		0	12.6607	0	0		0	0.0194061	0	0		0	0.0219804	0	0
	0	0.0238103	0	0		0	12.9647	0	0		0	12.7154	0	0		0	15.084	0	0		0	0.0167046	0	0		0	14.3232	0	0		0	15.6386	0	0		0	14.4693	0	0		0	0.0221784	0	0		0	0.0251204	0	0
	0	0.0267865	0	0		0	14.5853	0	0		0	14.3049	0	0		0	16.9695	0	0		0	0.0187926	0	0		0	16.1136	0	0		0	17.5934	0	0		0	16.278	0	0		0	0.0249507	0	0		0	0.0282605	0	0
	0	0.0297628	0	0		0	16.2059	0	0		0	15.8943	0	0		0	18.855	0	0		0	0.0208807	0	0		0	17.904	0	0		0	19.5482	0	0		0.0245743	18.0867	0.13587	296.684		9.24099e-05	0.027723	0.333333	0.00225737		0	0.0314005	0	0
	0	0.0327391	0	0		0	17.8265	0	0		0	17.4837	0	0		0	20.7405	0	0		0	0.0229688	0	0		0	19.6944	0	0		0	21.503	0	0		0	19.8953	0	0		0	0.0304953	0	0		0	0.0345406	0	0
	0	0.0357154	0	0		0	19.4471	0	0		0	19.0731	0	0		0	22.626	0	0		0	0.0250569	0	0		0	21.4848	0	0		0	23.4579	0	0		0	21.704	0	0		0	0.0332676	0	0		0	0.0376806	0	0
	7.83232e-05	0.0386917	0.202429	0.000974694		0	21.0677	0	0		0	20.6626	0	0		0	24.5115	0	0		0	0.0271449	0	0		0	23.2752	0	0		0	25.4127	0	0		0	23.5127	0	0		0	0.0360399	0	0		0	0.0408207	0	0
	0	0.0416679	0	0		0	22.6883	0	0		0	22.252	0	0		0	26.397	0	0		0	0.029233	0	0		0	25.0656	0	0		0	27.3675	0	0		0	25.3213	0	0		0	0.0388122	0	0		0	0.0439607	0	0
	0	0.0446442	0	0		0	24.3089	0	0		0	23.8414	0	0		0	28.2825	0	0		0	0.0313211	0	0		0	26.856	0	0		0	29.3223	0	0		0	27.13	0	0		0	0.0415845	0	0		0	0.0471008	0	0
	0	0.0476205	0	0		0	25.9295	0	0		0	25.4308	0	0		0	30.168	0	0		0	0.0334091	0	0		0	28.6464	0	0		0	31.2771	0	0		0	28.9387	0	0		0	0.0443568	0	0		0	0.0502408	0	0
	0	0.0505968	0	0		0	27.5501	0	0		0	27.0203	0	0		0	32.0534	0	0		0	0.0354972	0	0		0	30.4368	0	0		0	33.232	0	0		0	30.7473	0	0		0	0.0471291	0	0		0	0.0533809	0	0
	0	0.053573	0	0		0	29.1707	0	0		0	28.6097	0	0		0	33.9389	0	0		0	0.0375853	0	0		0	32.2272	0	0		0	35.1868	0	0		0	32.556	0	0		0	0.0499014	0	0		0	0.0565209	0	0
	0	0.0565493	0	0		0	30.7913	0	0		0	30.1991	0	0		0	35.8244	0	0		0	0.0396734	0	0		0	34.0176	0	0		0.0464851	37.1416	0.125156	412.284		0	34.3647	0	0		0	0.0526737	0	0		0	0.059661	0	0
	0	0.0595256	0	0		0	32.4119	0	0		0	31.7886	0	0		0	37.7099	0	0		0	0.0417614	0	0		0	35.8079	0	0		0	39.0964	0	0		0	36.1733	0	0		0	0.055446	0	0		0	0.062801	0	0
	0	0.0625019	0	0		0	34.0324	0	0		0	33.378	0	0		0.0299965	39.5954	0.0757576	110.139		0	0.0438495	0	0		0	37.5984	0	0		0	41.0513	0	0		0	37.982	0	0		0	0.0582183	0	0		0	0.0659411	0	0
	0	0.0654782	0	0		0	35.653	0	0		0	34.9674	0	0		0	41.4809	0	0		0	0.0459376	0	0		0	39.3888	0	0		0	43.0061	0	0		0	39.7907	0	0		0	0.0609906	0	0		0	0.0690811	0	0
	0	0.0684545	0	0		0	37.2736	0	0		0	36.5568	0	0		0	43.3664	0	0		0	0.0480256	0	0		0	41.1791	0	0		0	44.9609	0	0		0	41.5993	0	0		0	0.0637629	0	0		0	0.0722212	0	0
	0	0.0714307	0	0		0	38.8942	0	0		0	38.1463	0	0		0	45.2519	0	0		0	0.0501137	0	0		0	42.9695	0	0		0	46.9157	0	0		0	43.408	0	0		0	0.0665352	0	0		0	0.0753613	0	0
	0	0.074407	0	0		0	40.5148	0	0		0.0708301	39.7357	0.178253	226.433		0	47.1374	0	0		0	0.0522018	0	0		0	44.7599	0	0		0	48.8706	0	0		0	45.2167	0	0		0	0.0693075	0	0		0	0.0785013	0	0
	0	0.0773833	0	0		0	42.1354	0	0		0	41.3251	0	0		0	49.0229	0	0		0	0.0542899	0	0		0	46.5503	0	0		0	50.8254	0	0		0	47.0253	0	0		0.000240266	0.0720798	0.333333	0.00202058		0	0.0816414	0	0
	0	0.0803596	0	0		0	43.756	0	0		0	42.9145	0	0		0	50.9084	0	0		0	0.0563779	0	0		0	48.3407	0	0		0	52.7802	0	0		0	48.834	0	0		0	0.0748521	0	0		0	0.0847814	0	0
	0	0.0833359	0	0		0	45.3766	0	0		0	44.504	0	0		0	52.7939	0	0		0	0.058466	0	0		0	50.1311	0	0		0	54.735	0	0		0	50.6427	0	0		0	0.0776244	0	0		0	0.0879215	0	0
	0.000174721	0.0863122	0.202429	0.000845504		0	46.9972	0	0		0	46.0934	0	0		0	54.6794	0	0		0	0.0605541	0	0		0	51.9215	0	0		0	56.6898	0	0		0	52.4513	0	0		0	0.0803967	0	0		0	0.0910615	0	0
	0	0.0892884	0	0		0	48.6178	0	0		0.0849961	47.6828	0.178253	216.448		0.0428522	56.5649	0.0757576	100.554		0	0.0626421	0	0		0	53.7119	0	0		0	58.6447	0	0		0	54.26	0	0		0	0.083169	0	0		0	0.0942016	0	0
	0	0.0922647	0	0		0	50.2384	0	0		0	49.2722	0	0		0	58.4504	0	0		0	0.0647302	0	0		0	55.5023	0	0		0	60.5995	0	0		0	56.0687	0	0		0	0.0859412	0	0		0	0.0973416	0	0
	0.000192796	0.095241	0.202429	0.000822303		0	51.859	0	0		0	50.8617	0	0		0	60.3359	0	0		0	0.0668183	0	0		0	57.2927	0	0		0	62.5543	0	0		0	57.8773	0	0		0	0.0887136	0	0		0	0.100482	0	0
	0	0.0982173	0	0		0	53.4796	0	0		0	52.4511	0	0		0	62.2214	0	0		0	0.0689063	0	0		0	59.0831	0	0		0	64.5091	0	0		0	59.686	0	0		0	0.0914858	0	0		0	0.103622	0	0
	0	0.101194	0	0		0	55.1001	0	0		0	54.0405	0	0		0	64.1069	0	0		1.97207e-05	0.0709944	0.0277778	7.74742e-05		0	60.8735	0	0		0	66.4639	0	0		0	61.4947	0	0		0	0.0942582	0	0		0	0.106762	0	0
	0	0.10417	0	0		0	56.7207	0	0		0	55.63	0	0		0	65.9924	0	0		0	0.0730825	0	0		0	62.6639	0	0		0	68.4188	0	0		0	63.3034	0	0		0	0.0970305	0	0		0	0.109902	0	0
	0	0.107146	0	0		0	58.3413	0	0		0	57.2194	0	0		0	67.8779	0	0		0	0.0751706	0	0		0	64.4543	0	0		0	70.3736	0	0		0.176935	65.112	0.271739	479.952		0	0.0998027	0	0		0	0.113042	0	0
	0	0.110122	0	0		0	59.9619	0	0		0	58.8088	0	0		0	69.7634	0	0		0	0.0772586	0	0		0	66.2447	0	0		0	72.3284	0	0		0	66.9207	0	0		0	0.102575	0	0		0	0.116182	0	0
	0	0.113099	0	0		0	61.5825	0	0		0	60.3982	0	0		0	71.6489	0	0		2.20408e-05	0.0793467	0.0277778	7.50431e-05		0	68.0351	0	0		0	74.2832	0	0		0	68.7293	0	0		0	0.105347	0	0		0	0.119322	0	0
	0	0.116075	0	0		0	63.2031	0	0		0	61.9877	0	0		0	73.5344	0	0		0	0.0814348	0	0		0	69.8255	0	0		0	76.2381	0	0		0	70.538	0	0		0	0.10812	0	0		0	0.122462	0	0
	0	0.119051	0	0		0	64.8237	0	0		0.113328	63.5771	0.178253	197.153		0	75.4199	0	0		0	0.0835228	0	0		0	71.6159	0	0		0	78.1929	0	0		0	72.3467	0	0		0	0.110892	0	0		0	0.125602	0	0
	0	0.122027	0	0		0	66.4443	0	0		0	65.1665	0	0		0	77.3054	0	0		0	0.0856109	0	0		0	73.4063	0	0		0	80.1477	0	0		0	74.1553	0	0		0	0.113664	0	0		0	0.128742	0	0
	0	0.125004	0	0		0	68.0649	0	0		0	66.7559	0	0		0	79.1909	0	0		0	0.087699	0	0		0	75.1967	0	0		0	82.1025	0	0		0	75.964	0	0		0	0.116436	0	0		0	0.131882	0	0
	0	0.12798	0	0		0	69.6855	0	0		0	68.3454	0	0		0	81.0764	0	0		0	0.0897871	0	0		0	76.9871	0	0		0.105203	84.0573	0.125156	347.637		0	77.7727	0	0		0	0.119209	0	0		0	0.135022	0	0
	0	0.130956	0	0		0	71.3061	0	0		0	69.9348	0	0		0	82.9619	0	0		0	0.0918751	0	0		0	78.7775	0	0		0	86.0122	0	0		0	79.5814	0	0		0	0.121981	0	0		0	0.138162	0	0
	0.000271119	0.133933	0.202429	0.000725494		0	72.9267	0	0		0.127494	71.5242	0.178253	187.843		0	84.8474	0	0		0	0.0939632	0	0		0	80.5679	0	0		0	87.967	0	0		0	81.39	0	0		0	0.124753	0	0		0	0.141302	0	0
	0	0.136909	0	0		0	74.5473	0	0		0	73.1137	0	0		0	86.7329	0	0		0	0.0960513	0	0		0	82.3583	0	0		0	89.9218	0	0		0	83.1987	0	0		0	0.127526	0	0		0	0.144442	0	0
	0	0.139885	0	0		0	76.1679	0	0		0	74.7031	0	0		0	88.6184	0	0		0	0.0981394	0	0		0	84.1487	0	0		0	91.8766	0	0		0	85.0074	0	0		0	0.130298	0	0		0	0.147583	0	0
	0	0.142862	0	0		0	77.7884	0	0		0	76.2925	0	0		0	90.5039	0	0		0	0.100227	0	0		0	85.9391	0	0		0	93.8315	0	0		0	86.816	0	0		0	0.13307	0	0		0	0.150723	0	0
	0	0.145838	0	0		0	79.409	0	0		0	77.8819	0	0		0	92.3894	0	0		0	0.102316	0	0		0	87.7295	0	0		0	95.7863	0	0		0	88.6247	0	0		0	0.135843	0	0		0	0.153863	0	0
	0	0.148814	0	0		0	81.0296	0	0		0.14166	79.4714	0.178253	178.758		0	94.2749	0	0		2.9001e-05	0.104404	0.0277778	6.79821e-05		0	89.5199	0	0		0	97.7411	0	0		0	90.4334	0	0		0	0.138615	0	0		0	0.157003	0	0
	0.000307268	0.15179	0.202429	0.000682858		0	82.6502	0	0		0	81.0608	0	0		0.0728488	96.1604	0.0757576	79.8845		0	0.106492	0	0		0	91.3103	0	0		0	99.6959	0	0		0	92.242	0	0		0	0.141387	0	0		0	0.160143	0	0
	0	0.154767	0	0		0	84.2708	0	0		0	82.6502	0	0		0	98.0459	0	0		0	0.10858	0	0		0	93.1007	0	0		0	101.651	0	0		0.255572	94.0507	0.271739	416.13		0.000480532	0.144159	0.333333	0.00166377		0	0.163283	0	0
	0	0.157743	0	0		0	85.8914	0	0		0	84.2396	0	0		0	99.9313	0	0		3.07411e-05	0.110668	0.0277778	6.62714e-05		0	94.8911	0	0		0	103.606	0	0		0	95.8594	0	0		0	0.146932	0	0		0	0.166423	0	0
	0	0.160719	0	0		0	87.512	0	0		0	85.8291	0	0		0	101.817	0	0		0	0.112756	0	0		0	96.6815	0	0		0	105.56	0	0		0	97.668	0	0		0	0.149704	0	0		0	0.169563	0	0
	0	0.163695	0	0		0	89.1326	0	0		0	87.4185	0	0		0	103.702	0	0		0	0.114844	0	0		0	98.4719	0	0		0	107.515	0	0		0	99.4767	0	0		0	0.152476	0	0		0	0.172703	0	0
	0	0.166672	0	0		0	90.7532	0	0		0	89.0079	0	0		0	105.588	0	0		0	0.116932	0	0		0	100.262	0	0		0	109.47	0	0		0	101.285	0	0		0	0.155249	0	0		0	0.175843	0	0
	0	0.169648	0	0		0	92.3738	0	0		0	90.5974	0	0		0	107.473	0	0		3.30611e-05	0.11902	0.0277778	6.40243e-05		0.221854	102.053	0.217391	275.762		0	111.425	0	0		0	103.094	0	0		0	0.158021	0	0		0	0.178983	0	0
	0	0.172624	0	0		0	93.9944	0	0		0	92.1868	0	0		0	109.359	0	0		0	0.121108	0	0		0	103.843	0	0		0	113.38	0	0		0	104.903	0	0		0	0.160793	0	0		0	0.182123	0	0
	0	0.175601	0	0		0.2616	95.615	0.273598	306.91		0	93.7762	0	0		0	111.244	0	0		0	0.123196	0	0		0	105.633	0	0		0	115.335	0	0		0	106.711	0	0		0	0.163566	0	0		0	0.185263	0	0
	0	0.178577	0	0		0	97.2356	0	0		0.509977	95.3656	0.534759	483.794		0	113.13	0	0		0	0.125284	0	0		0	107.424	0	0		0	117.289	0	0		0	108.52	0	0		0	0.166338	0	0		0	0.188403	0	0
	0	0.181553	0	0		0	98.8561	0	0		0	96.9551	0	0		0	115.015	0	0		3.53812e-05	0.127372	0.0277778	6.1816e-05		0	109.214	0	0		0	119.244	0	0		0	110.329	0	0		0	0.16911	0	0		0	0.191543	0	0
	0.000373541	0.184529	0.202429	0.000608044		0	100.477	0	0		0	98.5445	0	0		0	116.901	0	0		0	0.12946	0	0		0	111.005	0	0		0	121.199	0	0		0	112.137	0	0		0	0.171882	0	0		0	0.194683	0	0
	0	0.187506	0	0		0	102.097	0	0		0	100.134	0	0		0	118.786	0	0		0	0.131549	0	0		0.245207	112.795	0.217391	259.378		0	123.154	0	0		0	113.946	0	0		0	0.174655	0	0		0	0.197823	0	0
	0	0.190482	0	0		0.141885	103.718	0.136799	146.12		0	101.723	0	0		0	120.672	0	0		0	0.133637	0	0		0	114.585	0	0		0	125.109	0	0		0	115.755	0	0		0	0.177427	0	0		0	0.200963	0	0
	0	0.193458	0	0		0	105.338	0	0		0.552475	103.313	0.534759	458.566		0	122.557	0	0		0	0.135725	0	0		0	116.376	0	0		0	127.063	0	0		0	117.563	0	0		0	0.180199	0	0		0	0.204103	0	0
	0	0.196435	0	0		0	106.959	0	0		0	104.902	0	0		0	124.443	0	0		0	0.137813	0	0		0	118.166	0	0		0	129.018	0	0		0	119.372	0	0		0	0.182972	0	0		0	0.207243	0	0
	0.000403666	0.199411	0.202429	0.000575472		0	108.58	0	0		0	106.492	0	0		0	126.328	0	0		0	0.139901	0	0		0	119.957	0	0		0.327843	130.973	0.250313	576.999		0	121.181	0	0		0	0.185744	0	0		0	0.210384	0	0
	0	0.202387	0	0		0	110.2	0	0		0	108.081	0	0		0	128.214	0	0		0	0.141989	0	0		0.264668	121.747	0.217391	246.108		0	132.928	0	0		0	122.989	0	0		0	0.188516	0	0		0	0.213524	0	0
	0	0.205363	0	0		0.30594	111.821	0.273598	277.928		0	109.671	0	0		0	130.099	0	0		4.00214e-05	0.144077	0.0277778	5.75156e-05		0	123.537	0	0		0	134.883	0	0		0	124.798	0	0		0	0.191289	0	0		0	0.216664	0	0
	0.00084348	0.20834	0.404858	0.00111272		0	113.442	0	0		0	111.26	0	0		0	131.985	0	0		0	0.146165	0	0		0	125.328	0	0		0	136.838	0	0		0	126.607	0	0		0	0.194061	0	0		0	0.219804	0	0
	0	0.211316	0	0		0	115.062	0	0		0	112.849	0	0		0	133.87	0	0		0	0.148253	0	0		0	127.118	0	0		0	138.792	0	0		0	128.415	0	0		0	0.196833	0	0		0	0.222944	0	0
	0.00043379	0.214292	0.202429	0.000543797		0	116.683	0	0		0	114.439	0	0		0.205691	135.756	0.151515	123.182		0	0.150341	0	0		0	128.909	0	0		0	140.747	0	0		0.176935	130.224	0.13587	171.377		0	0.199605	0	0		0	0.226084	0	0
	0	0.217269	0	0		0	118.303	0	0		0	116.028	0	0		0	137.641	0	0		0	0.152429	0	0		0	130.699	0	0		0	142.702	0	0		0	132.033	0	0		0	0.202378	0	0		0	0.229224	0	0
	0	0.220245	0	0		0	119.924	0	0		0	117.618	0	0		0	139.527	0	0		0	0.154517	0	0		0	132.489	0	0		0	144.657	0	0		0	133.841	0	0		0	0.20515	0	0		0	0.232364	0	0
	0.000451865	0.223221	0.202429	0.000525222		0	121.544	0	0		0.21249	119.207	0.178253	136.713		0	141.412	0	0		0	0.156605	0	0		0	134.28	0	0		0	146.612	0	0		0	135.65	0	0		0	0.207922	0	0		0	0.235504	0	0
	0	0.226197	0	0		0	123.165	0	0		0	120.796	0	0		0	143.298	0	0		4.40815e-05	0.158693	0.0277778	5.38799e-05		0	136.07	0	0		0	148.566	0	0		0	137.459	0	0		0	0.210695	0	0		0	0.238644	0	0
	0	0.229174	0	0		0	124.786	0	0		0	122.386	0	0		0	145.183	0	0		0	0.160781	0	0		0	137.861	0	0		0	150.521	0	0		0.189222	139.267	0.13587	162.76		0	0.213467	0	0		0	0.241784	0	0
	0.000939878	0.23215	0.404858	0.00101394		0	126.406	0	0		0	123.975	0	0		0	147.069	0	0		0	0.16287	0	0		0.303589	139.651	0.217391	220.613		0	152.476	0	0		0	141.076	0	0		0	0.216239	0	0		0	0.244924	0	0
	0	0.235126	0	0		0.175139	128.027	0.136799	125.191		0	125.565	0	0		0	148.954	0	0		0	0.164958	0	0		0	141.441	0	0		0	154.431	0	0		0	142.885	0	0		0	0.219012	0	0		0	0.248064	0	0
	0.000481989	0.238102	0.202429	0.000494981		0	129.647	0	0		0.226656	127.154	0.178253	128.979		0.342818	150.84	0.227273	165.74		4.64016e-05	0.167046	0.0277778	5.18557e-05		0	143.232	0	0		0	156.386	0	0		0	144.693	0	0		0	0.221784	0	0		0	0.251204	0	0
	0	0.241079	0	0		0	131.268	0	0		0	128.744	0	0		0	152.725	0	0		0	0.169134	0	0		0	145.022	0	0		0	158.341	0	0		0	146.502	0	0		0	0.224556	0	0		0	0.254344	0	0
	0	0.244055	0	0		0	132.889	0	0		0	130.333	0	0		0	154.611	0	0		0	0.171222	0	0		0	146.813	0	0		0	160.295	0	0		0	148.311	0	0		0	0.227328	0	0		0	0.257484	0	0
	0	0.247031	0	0		0	134.509	0	0		0	131.923	0	0		0	156.496	0	0		0	0.17331	0	0		0	148.603	0	0		0	162.25	0	0		0.203967	150.119	0.13587	152.714		0.000767003	0.230101	0.333333	0.00128361		0	0.260624	0	0
	0	0.250008	0	0		0	136.13	0	0		0	133.512	0	0		0.119986	158.382	0.0757576	52.2039		0	0.175398	0	0		0	150.393	0	0		0	164.205	0	0		0	151.928	0	0		0	0.232873	0	0		0	0.263764	0	0
	0	0.252984	0	0		0	137.75	0	0		0.722467	135.101	0.534759	364.411		0	160.267	0	0		0	0.177486	0	0		0	152.184	0	0		0	166.16	0	0		0	153.737	0	0		0	0.235645	0	0		0	0.266904	0	0
	0.00103628	0.25596	0.404858	0.000919752		0	139.371	0	0		0	136.691	0	0		0	162.153	0	0		0	0.179574	0	0		0	153.974	0	0		0	168.115	0	0		0	155.545	0	0		0	0.238418	0	0		0	0.270045	0	0
	0	0.258936	0	0		0	140.992	0	0		0	138.28	0	0		0	164.038	0	0		0	0.181662	0	0		0	155.765	0	0		0	170.07	0	0		0	157.354	0	0		0	0.24119	0	0		0	0.273185	0	0
	0	0.261913	0	0		0	142.612	0	0		0	139.87	0	0		0	165.924	0	0		0	0.18375	0	0		0	157.555	0	0		0	172.024	0	0		0	159.163	0	0		0	0.243962	0	0		0	0.276325	0	0
	0	0.264889	0	0		0	144.233	0	0		0	141.459	0	0		0	167.809	0	0		0	0.185838	0	0		0.346403	159.345	0.217391	194.178		0	173.979	0	0		0	160.971	0	0		0	0.246735	0	0		0	0.279465	0	0
	0	0.267865	0	0		0	145.853	0	0		0.509977	143.048	0.356506	228.374		0	169.695	0	0		0	0.187926	0	0		0	161.136	0	0		0	175.934	0	0		0	162.78	0	0		0	0.249507	0	0		0	0.282605	0	0
	0.000548262	0.270842	0.202429	0.000431608		0	147.474	0	0		0	144.638	0	0		0	171.58	0	0		0	0.190015	0	0		0	162.926	0	0		0	177.889	0	0		0	164.589	0	0		0	0.252279	0	0		0	0.285745	0	0
	0	0.273818	0	0		0	149.095	0	0		0	146.227	0	0		0	173.466	0	0		0	0.192103	0	0		0	164.717	0	0		0	179.844	0	0		0	166.397	0	0		0	0.255051	0	0		0	0.288885	0	0
	0	0.276794	0	0		0	150.715	0	0		0	147.817	0	0		0.265684	175.351	0.151515	91.3454		0	0.194191	0	0		0	166.507	0	0		0	181.798	0	0		0	168.206	0	0		0	0.257824	0	0		0	0.292025	0	0
	0.00113267	0.27977	0.404858	0.000830155		0	152.336	0	0		0	149.406	0	0		0	177.237	0	0		0	0.196279	0	0		0	168.297	0	0		0	183.753	0	0		0	170.015	0	0		0	0.260596	0	0		0	0.295165	0	0
	0	0.282747	0	0		0	153.956	0	0		1.34577	150.996	0.891266	535.644		0	179.122	0	0		0.000220408	0.198367	0.111111	0.00017844		0	170.088	0	0		0	185.708	0	0		0	171.823	0	0		0	0.263368	0	0		0	0.298305	0	0
	0.00115677	0.285723	0.404858	0.000808473		0	155.577	0	0		0	152.585	0	0		0	181.008	0	0		0	0.200455	0	0		0	171.878	0	0		0	187.663	0	0		0	173.632	0	0		0	0.266141	0	0		0	0.301445	0	0
	0	0.288699	0	0		0	157.197	0	0		0	154.174	0	0		0.277111	182.893	0.151515	85.8199		0	0.202543	0	0		0	173.669	0	0		0	189.618	0	0		0	175.441	0	0		0	0.268913	0	0		0	0.304585	0	0
	0	0.291675	0	0		0.434523	158.818	0.273598	202.007		0	155.764	0	0		0	184.779	0	0		0	0.204631	0	0		0	175.459	0	0		0	191.572	0	0		0	177.249	0	0		0	0.271685	0	0		0	0.307725	0	0
	0.00357877	0.294652	1.21457	0.00232946		0	160.439	0	0		0	157.353	0	0		0	186.664	0	0		0.000229688	0.206719	0.111111	0.00017108		0.385325	177.249	0.217391	171.61		0	193.527	0	0		0	179.058	0	0		0	0.274458	0	0		0	0.310865	0	0
	0	0.297628	0	0		0	162.059	0	0		0	158.943	0	0		0	188.55	0	0		0	0.208807	0	0		0	179.04	0	0		0	195.482	0	0		0	180.867	0	0		0	0.27723	0	0		0	0.314005	0	0
	0	0.300604	0	0		0	163.68	0	0		0	160.532	0	0		0.288538	190.435	0.151515	80.4669		0	0.210895	0	0		0	180.83	0	0		0	197.437	0	0		0	182.675	0	0		0	0.280002	0	0		0	0.317145	0	0
	0.000614536	0.303581	0.202429	0.000372574		0	165.3	0	0		0	162.122	0	0		0	192.321	0	0		0	0.212983	0	0		0	182.621	0	0		0	199.392	0	0		0	184.484	0	0		0	0.282774	0	0		0	0.320285	0	0
	0	0.306557	0	0		0.456692	166.921	0.273598	190.138		0	163.711	0	0		0	194.206	0	0		0.000179226	0.215071	0.0833333	0.000122906		0	184.411	0	0		0	201.347	0	0		0	186.293	0	0		0	0.285547	0	0		0	0.323425	0	0
	0.00125317	0.309533	0.404858	0.000724613		0	168.542	0	0		0	165.3	0	0		0	196.092	0	0		0	0.217159	0	0		0.809571	186.201	0.434783	321.698		0	203.302	0	0		0	188.101	0	0		0.000961063	0.288319	0.333333	0.00105406		0	0.326565	0	0
	0	0.312509	0	0		0	170.162	0	0		0.297486	166.89	0.178253	93.6878		0	197.977	0	0		0	0.219248	0	0		0	187.992	0	0		0.513783	205.256	0.250313	412.265		0	189.91	0	0		0	0.291091	0	0		0	0.329705	0	0
	0	0.315486	0	0		0	171.783	0	0		0	168.479	0	0		0.302822	199.863	0.151515	74.0179		0	0.221335	0	0		0	189.782	0	0		0	207.211	0	0		0	191.719	0	0		0	0.293864	0	0		0.00396245	0.332846	1.19048	0.00379859
	0	0.318462	0	0		0	173.403	0	0		0	170.069	0	0		0	201.748	0	0		0.000186186	0.223424	0.0833333	0.000117618		0	191.572	0	0		0	209.166	0	0		0	193.527	0	0		0	0.296636	0	0		0	0.335986	0	0
	0	0.321438	0	0		0.239431	175.024	0.136799	89.3146		0	171.658	0	0		0	203.634	0	0		0	0.225512	0	0		0	193.363	0	0		0	211.121	0	0		0.530804	195.336	0.271739	228.596		0	0.299408	0	0		0	0.339126	0	0
	0	0.324415	0	0		0	176.645	0	0		0	173.248	0	0		0	205.519	0	0		0	0.2276	0	0		0	195.153	0	0		0	213.076	0	0		0	197.145	0	0		0	0.302181	0	0		0	0.342266	0	0
	0.0019882	0.327391	0.607287	0.000997097		0	178.265	0	0		0.311652	174.837	0.178253	87.3051		0.157125	207.405	0.0757576	34.5264		0	0.229688	0	0		0.428138	196.944	0.217391	148.395		0	215.03	0	0		0	198.953	0	0		0.00101651	0.304953	0.333333	0.000992625		0.00411197	0.345406	1.19048	0.00363154
	0	0.330367	0	0		0	179.886	0	0		0	176.426	0	0		0	209.29	0	0		0	0.231776	0	0		0	198.734	0	0		0	216.985	0	0		0	200.762	0	0		0	0.307725	0	0		0	0.348546	0	0
	0.00134957	0.333343	0.404858	0.000645345		0	181.506	0	0		0	178.016	0	0		0	211.176	0	0		0	0.233864	0	0		0	200.524	0	0		0	218.94	0	0		0	202.571	0	0		0	0.310497	0	0		0	0.351686	0	0
	0	0.33632	0	0		0.501031	183.127	0.273598	167.479		0	179.605	0	0		0	213.061	0	0		0	0.235952	0	0		0	202.315	0	0		0	220.895	0	0		0	204.379	0	0		0	0.31327	0	0		0	0.354826	0	0
	0	0.339296	0	0		0	184.748	0	0		0	181.195	0	0		0.488515	214.947	0.227273	96.3898		0.000198367	0.23804	0.0833333	0.000108644		0	204.105	0	0		0	222.85	0	0		0.560293	206.188	0.271739	211.81		0	0.316042	0	0		0	0.357966	0	0
	0.00207858	0.342272	0.607287	0.000925203		0	186.368	0	0		1.62909	182.784	0.891266	405.738		0	216.832	0	0		0	0.240128	0	0		0	205.896	0	0		0	224.804	0	0		0	207.997	0	0		0	0.318814	0	0		0	0.361106	0	0
	0	0.345249	0	0		0	187.989	0	0		0	184.374	0	0		0	218.718	0	0		0	0.242216	0	0		0	207.686	0	0		0	226.759	0	0		0	209.805	0	0		0	0.321587	0	0		0	0.364246	0	0
	0	0.348225	0	0		0	189.609	0	0		0	185.963	0	0		0	220.603	0	0		0	0.244304	0	0		0	209.476	0	0		0	228.714	0	0		0	211.614	0	0		0	0.324359	0	0		0	0.367386	0	0
	0.00284373	0.351201	0.809717	0.00117781		1.308	191.23	0.683994	391.723		0	187.552	0	0		0.674208	222.489	0.30303	119.279		0.000273769	0.246392	0.111111	0.000138234		0	211.267	0	0		0	230.669	0	0		0	213.423	0	0		0	0.327131	0	0		0	0.370526	0	0
	0	0.354177	0	0		0	192.851	0	0		0	189.142	0	0		0	224.374	0	0		0	0.24848	0	0		0	213.057	0	0		0	232.624	0	0		0.292434	215.231	0.13587	99.1554		0	0.329904	0	0		0	0.373666	0	0
	0.000722983	0.357154	0.202429	0.000285333		0	194.471	0	0		2.71988	190.731	1.42603	601.72		0	226.26	0	0		0	0.250569	0	0		0.46706	214.848	0.217391	128.754		0	234.579	0	0		0	217.04	0	0		0	0.332676	0	0		0.00897158	0.376806	2.38095	0.0064607
	0	0.36013	0	0		0	196.092	0	0		0	192.321	0	0		0	228.145	0	0		0	0.252657	0	0		0	216.638	0	0		0	236.534	0	0		0	218.849	0	0		0	0.335448	0	0		0	0.379946	0	0
	0	0.363106	0	0		0	197.712	0	0		0	193.91	0	0		0.522797	230.031	0.227273	82.7869		0.000212287	0.254745	0.0833333	9.88235e-05		0	218.429	0	0		0	238.488	0	0		0	220.657	0	0		0	0.33822	0	0		0	0.383086	0	0
	0	0.366082	0	0		0.818056	199.333	0.410397	219.387		0	195.5	0	0		0	231.916	0	0		0	0.256833	0	0		0	220.219	0	0		0	240.443	0	0		0	222.466	0	0		0	0.340993	0	0		0	0.386226	0	0
	0	0.369059	0	0		0	200.953	0	0		0	197.089	0	0		0	233.802	0	0		0	0.258921	0	0		0	222.009	0	0		0	242.398	0	0		0.609442	224.275	0.271739	185.256		0	0.343765	0	0		0	0.389367	0	0
	0	0.372035	0	0		0	202.574	0	0		2.1249	198.678	1.06952	417.047		0	235.687	0	0		0	0.261009	0	0		2.43261	223.8	1.08696	597.28		0	244.353	0	0		0	226.083	0	0		0.00231025	0.346537	0.666667	0.00169421		0	0.392506	0	0
	0.00303653	0.375011	0.809717	0.00103534		0	204.195	0	0		0	200.268	0	0		0	237.573	0	0		0.000438495	0.263097	0.166667	0.000188176		0	225.59	0	0		0	246.308	0	0		0	227.892	0	0		0	0.34931	0	0		0	0.395647	0	0
	0	0.377988	0	0		0	205.815	0	0		0	201.857	0	0		0.907039	239.458	0.378788	124.684		0	0.265185	0	0		0	227.381	0	0		0	248.262	0	0		0	229.701	0	0		0	0.352082	0	0		0	0.398787	0	0
	0.00154236	0.380964	0.404858	0.000500579		0.85131	207.436	0.410397	204.279		0	203.447	0	0		0	241.344	0	0		0	0.267273	0	0		0	229.171	0	0		0	250.217	0	0		0	231.509	0	0		0	0.354854	0	0		0	0.401927	0	0
	0	0.38394	0	0		0	209.056	0	0		0	205.036	0	0		0	243.229	0	0		0	0.269361	0	0		0	230.961	0	0		0.315609	252.172	0.125156	161.228		0.634016	233.318	0.271739	172.645		0	0.357627	0	0		0.00482222	0.405067	1.19048	0.00288935
	0	0.386916	0	0		0	210.677	0	0		1.10495	206.626	0.534759	192.077		0	245.115	0	0		0.000377013	0.271449	0.138889	0.000149114		1.01196	232.752	0.434783	221.013		0	254.127	0	0		0	235.127	0	0		0	0.360399	0	0		0	0.408207	0	0
	0.000789257	0.389893	0.202429	0.00023774		0	212.298	0	0		0	208.215	0	0		2.05833	247	0.833333	251.973		0	0.273537	0	0		0	234.542	0	0		0	256.082	0	0		0	236.935	0	0		0	0.363171	0	0		0	0.411347	0	0
	0	0.392869	0	0		0	213.918	0	0		0	209.804	0	0		0	248.886	0	0		0	0.275625	0	0		0	236.333	0	0		0	258.036	0	0		0	238.744	0	0		0	0.365943	0	0		0	0.414487	0	0
	0	0.395845	0	0		1.47427	215.539	0.683994	316.183		0	211.394	0	0		0	250.771	0	0		0.000385713	0.277714	0.138889	0.000143467		0	238.123	0	0		0	259.991	0	0		0	240.553	0	0		0	0.368716	0	0		0	0.417627	0	0
	0.00161466	0.398822	0.404858	0.000451025		0	217.159	0	0		0	212.983	0	0		0	252.657	0	0		0	0.279801	0	0		0	239.913	0	0		0	261.946	0	0		0.658591	242.361	0.271739	160.479		0	0.371488	0	0		0	0.420767	0	0
	0	0.401798	0	0		0	218.78	0	0		1.52993	214.573	0.713013	235.075		1.92835	254.542	0.757576	209.627		0	0.28189	0	0		0	241.704	0	0		0	263.901	0	0		0	244.17	0	0		0	0.37426	0	0		0	0.423907	0	0
	0.00163876	0.404774	0.404858	0.000435081		0	220.401	0	0		0	216.162	0	0		0	256.428	0	0		0	0.283978	0	0		0	243.494	0	0		0	265.856	0	0		0	245.979	0	0		0.00251355	0.377033	0.666667	0.00149544		0	0.427047	0	0
	0	0.407751	0	0		0	222.021	0	0		0	217.751	0	0		0	258.313	0	0		0.000476776	0.286066	0.166667	0.000163329		0	245.285	0	0		0	267.811	0	0		0	247.787	0	0		0	0.379805	0	0		0	0.430187	0	0
	0	0.410727	0	0		1.22376	223.642	0.547196	234.24		0	219.341	0	0		0	260.199	0	0		0	0.288154	0	0		0	247.075	0	0		0	269.765	0	0		0	249.596	0	0		0	0.382577	0	0		0	0.433327	0	0
	0.00251237	0.413703	0.607287	0.000617555		0	225.262	0	0		0	220.93	0	0		1.78694	262.084	0.681818	171.944		0	0.290242	0	0		0	248.865	0	0		0	271.72	0	0		1.36633	251.405	0.543478	297.515		0	0.38535	0	0		0	0.436467	0	0
	0	0.416679	0	0		0	226.883	0	0		1.98324	222.52	0.891266	268.685		0	263.97	0	0		0	0.29233	0	0		0	250.656	0	0		0	273.675	0	0		0	253.213	0	0		0	0.388122	0	0		0	0.439607	0	0
	0	0.419656	0	0		0	228.504	0	0		0	224.109	0	0		0	265.855	0	0		0.000327131	0.294418	0.111111	0.000103153		1.64639	252.446	0.652174	276.132		0	275.63	0	0		0	255.022	0	0		0	0.390894	0	0		0	0.442747	0	0
	0.00513318	0.422632	1.21457	0.00116691		3.14807	230.124	1.36799	549.48		0	225.699	0	0		0	267.741	0	0		0	0.296506	0	0		0	254.237	0	0		0	277.585	0	0		0	256.831	0	0		0	0.393666	0	0		0	0.445887	0	0
	0	0.425608	0	0		0	231.745	0	0		0	227.288	0	0		0	269.626	0	0		0	0.298594	0	0		0	256.027	0	0		0	279.539	0	0		0	258.639	0	0		0	0.396439	0	0		0	0.449028	0	0
	0.00260274	0.428584	0.607287	0.000561262		0	233.365	0	0		0	228.877	0	0		1.43983	271.512	0.530303	118.327		0	0.300682	0	0		0	257.817	0	0		0	281.494	0	0		0	260.448	0	0		0	0.399211	0	0		0	0.452167	0	0
	0	0.431561	0	0		0	234.986	0	0		2.8757	230.467	1.24777	342.512		0	273.397	0	0		0.000336411	0.30277	0.111111	9.75754e-05		0	259.608	0	0		0	283.449	0	0		1.06898	262.257	0.407609	202.917		0	0.401983	0	0		0	0.455308	0	0
	0	0.434537	0	0		0	236.607	0	0		0	232.056	0	0		0	275.283	0	0		0	0.304858	0	0		1.70477	261.398	0.652174	252.628		0	285.404	0	0		0	264.065	0	0		0.00134919	0.404756	0.333333	0.000662745		0	0.458448	0	0
	0.00619958	0.437513	1.417	0.00123381		2.60714	238.227	1.09439	404.757		0	233.646	0	0		0	277.168	0	0		0	0.306947	0	0		0	263.188	0	0		0	287.359	0	0		0	265.874	0	0		0	0.407528	0	0		0.00549509	0.461588	1.19048	0.0022644
	0	0.440489	0	0		0	239.848	0	0		0	235.235	0	0		2.53685	279.054	0.909091	182.88		0	0.309034	0	0		0	264.979	0	0		0.72419	289.314	0.250313	259.172		0	267.683	0	0		0	0.4103	0	0		0	0.464728	0	0
	0	0.443466	0	0		0	241.468	0	0		0	236.825	0	0		0	280.939	0	0		0.000777807	0.311123	0.25	0.000207344		0	266.769	0	0		0	291.269	0	0		0	269.491	0	0		0	0.413073	0	0		0	0.467868	0	0
	0.00180746	0.446442	0.404858	0.000331507		0	243.089	0	0		2.1249	238.414	0.891266	221.744		0	282.825	0	0		0	0.313211	0	0		0	268.56	0	0		0	293.223	0	0		1.47446	271.3	0.543478	249.069		0	0.415845	0	0		0	0.471008	0	0
	0	0.449418	0	0		0	244.709	0	0		0	240.004	0	0		0	284.71	0	0		0	0.315299	0	0		1.76315	270.35	0.652174	230.169		0	295.178	0	0		0	273.109	0	0		0	0.418617	0	0		0	0.474148	0	0
	0.000915779	0.452395	0.202429	0.000158929		2.35884	246.33	0.957592	324.947		0	241.593	0	0		3.25677	286.596	1.13636	204.935		0	0.317387	0	0		0	272.14	0	0		0	297.133	0	0		0	274.917	0	0		0	0.421389	0	0		0.005682	0.477288	1.19048	0.00210431
	0	0.455371	0	0		0	247.951	0	0		0	243.182	0	0		0	288.481	0	0		0.000532458	0.319475	0.166667	0.000130327		0	273.931	0	0		0	299.088	0	0		0	276.726	0	0		0	0.424162	0	0		0	0.480428	0	0
	0	0.458347	0	0		0	249.571	0	0		0	244.772	0	0		0	290.367	0	0		0	0.321563	0	0		0	275.721	0	0		0	301.043	0	0		0	278.535	0	0		0	0.426934	0	0		0	0.483568	0	0
	0.00186771	0.461323	0.404858	0.000297923		0	251.192	0	0		4.39147	246.361	1.78253	399.925		0	292.252	0	0		0	0.323651	0	0		0	277.512	0	0		0	302.997	0	0		2.66631	280.343	0.951087	399.823		0	0.429706	0	0		0	0.486708	0	0
	0	0.4643	0	0		0	252.812	0	0		0	247.951	0	0		3.34247	294.138	1.13636	182.562		0.000904831	0.325739	0.277778	0.00020759		3.03589	279.302	1.08696	347.927		0	304.952	0	0		0	282.152	0	0		0.00288319	0.432479	0.666667	0.00116579		0	0.489848	0	0
	0	0.467276	0	0		2.43643	254.433	0.957592	296.988		0	249.54	0	0		0	296.023	0	0		0	0.327827	0	0		0	281.092	0	0		0	306.907	0	0		0	283.961	0	0		0	0.435251	0	0		0.0117378	0.492988	2.38095	0.00390016
	0.00285578	0.470252	0.607287	0.000417951		0	256.054	0	0		0	251.13	0	0		0	297.909	0	0		0	0.329915	0	0		0	282.883	0	0		0	308.862	0	0		0	285.769	0	0		0	0.438023	0	0		0	0.496128	0	0
	0	0.473229	0	0		0	257.674	0	0		0	252.719	0	0		0	299.794	0	0		0	0.332003	0	0		0	284.673	0	0		0	310.817	0	0		0	287.578	0	0		0	0.440796	0	0		0	0.499268	0	0
	0	0.476205	0	0		0	259.295	0	0		2.26656	254.308	0.891266	179.307		5.94217	301.68	1.9697	279.903		0.00102083	0.334091	0.305556	0.000214608		0	286.464	0	0		0	312.772	0	0		2.75232	289.387	0.951087	365.331		0	0.443568	0	0		0	0.502408	0	0
	0.00388001	0.479181	0.809717	0.00051998		0	260.915	0	0		0	255.898	0	0		0	303.565	0	0		0	0.33618	0	0		0	288.254	0	0		0	314.726	0	0		0	291.195	0	0		0	0.44634	0	0		0	0.505548	0	0
	0	0.482158	0	0		2.87317	262.536	1.09439	308.9		0	257.487	0	0		0	305.451	0	0		0	0.338267	0	0		1.89159	290.044	0.652174	184.44		0.396347	316.681	0.125156	108.48		0	293.004	0	0		0.00299408	0.449112	0.666667	0.00107489		0	0.508688	0	0
	0.0019641	0.485134	0.404858	0.000247919		0	264.157	0	0		0	259.077	0	0		0	307.336	0	0		0	0.340356	0	0		0	291.835	0	0		0	318.636	0	0		0	294.813	0	0		0	0.451885	0	0		0	0.511829	0	0
	0	0.48811	0	0		0	265.777	0	0		0	260.666	0	0		0	309.222	0	0		0.00190247	0.342444	0.555556	0.00036599		0	293.625	0	0		0	320.591	0	0		0	296.621	0	0		0	0.454657	0	0		0	0.514969	0	0
	0	0.491086	0	0		0	267.398	0	0		1.86991	262.255	0.713013	127.821		4.00668	311.107	1.28788	155.211		0	0.344532	0	0		0	295.416	0	0		0	322.546	0	0		0.405476	298.43	0.13587	47.485		0	0.457429	0	0		0	0.518109	0	0
	0.00600076	0.494063	1.21457	0.000691053		0	269.018	0	0		0	263.845	0	0		0	312.993	0	0		0	0.34662	0	0		0	297.206	0	0		0	324.5	0	0		0	300.239	0	0		0	0.460202	0	0		0.0124107	0.521249	2.38095	0.00337451
	0	0.497039	0	0		2.22139	270.639	0.820793	209.866		0	265.434	0	0		0	314.878	0	0		0	0.348708	0	0		3.24996	298.996	1.08696	275.544		1.63432	326.455	0.500626	405.588		0	302.047	0	0		0.00771623	0.462974	1.66667	0.00250491		0	0.524389	0	0
	0	0.500015	0	0		0	272.26	0	0		0	267.024	0	0		0	316.764	0	0		0.000779547	0.350796	0.222222	0.000137023		0	300.787	0	0		0	328.41	0	0		0	303.856	0	0		0	0.465746	0	0		0	0.527529	0	0
	0.00509101	0.502991	1.01215	0.000533571		0	273.88	0	0		0	268.613	0	0		6.27642	318.649	1.9697	205.886		0	0.352884	0	0		0	302.577	0	0		0	330.365	0	0		0	305.665	0	0		0	0.468519	0	0		0	0.530669	0	0
	0	0.505968	0	0		0	275.501	0	0		2.88987	270.203	1.06952	169.647		0	320.534	0	0		0	0.354972	0	0		0	304.368	0	0		0	332.32	0	0		1.25329	307.473	0.407609	129.006		0	0.471291	0	0		0.00635487	0.533809	1.19048	0.00157655
	0.00309075	0.508944	0.607287	0.000303758		0	277.121	0	0		0	271.792	0	0		0	322.42	0	0		0	0.35706	0	0		0	306.158	0	0		0	334.275	0	0		0	309.282	0	0		0	0.474063	0	0		0	0.536949	0	0
	0	0.51192	0	0		4.57579	278.742	1.64159	378.271		0	273.382	0	0		0	324.305	0	0		0.00209503	0.359148	0.583333	0.000335896		5.35562	307.948	1.73913	392.688		2.10406	336.229	0.625782	472.763		0	311.091	0	0		0.00158945	0.476835	0.333333	0.000465796		0	0.540089	0	0
	0	0.514897	0	0		0	280.363	0	0		0	274.971	0	0		5.68363	326.191	1.74242	156.25		0	0.361236	0	0		0	309.739	0	0		0	338.184	0	0		0	312.899	0	0		0	0.479608	0	0		0	0.543229	0	0
	0.0041933	0.517873	0.809717	0.000373317		0	281.983	0	0		0	276.56	0	0		0	328.077	0	0		0	0.363324	0	0		0	311.529	0	0		0	340.139	0	0		0	314.708	0	0		0	0.48238	0	0		0	0.546369	0	0
	0	0.520849	0	0		0	283.604	0	0		5.45392	278.15	1.96078	273.007		0	329.962	0	0		0.00213157	0.365412	0.583333	0.000318588		0	313.32	0	0		0	342.094	0	0		1.7202	316.517	0.543478	154.965		0	0.485152	0	0		0	0.549509	0	0
	0	0.523825	0	0		0	285.224	0	0		0	279.739	0	0		0	331.848	0	0		0	0.367501	0	0		0	315.11	0	0		0	344.049	0	0		0	318.325	0	0		0	0.487925	0	0		0	0.552649	0	0
	0.0031992	0.526802	0.607287	0.000257186		2.3544	286.845	0.820793	169.482		0	281.329	0	0		6.06787	333.733	1.81818	138.107		0	0.369589	0	0		5.51131	316.9	1.73913	347.293		2.16523	346.003	0.625782	439.738		0	320.134	0	0		0.00163566	0.490697	0.333333	0.000431892		0	0.555789	0	0
	0	0.529778	0	0		0	288.466	0	0		0	282.918	0	0		0	335.618	0	0		0	0.371677	0	0		0	318.691	0	0		0	347.958	0	0		0	321.943	0	0		0	0.493469	0	0		0	0.558929	0	0
	0.0021569	0.532754	0.404858	0.000161682		0	290.086	0	0		0	284.507	0	0		0	337.504	0	0		0.00145353	0.373765	0.388889	0.000197482		0	320.481	0	0		0	349.913	0	0		0	323.751	0	0		0	0.496241	0	0		0	0.562069	0	0
	0	0.535731	0	0		0	291.707	0	0		4.58979	286.097	1.60428	194.295		0	339.389	0	0		0	0.375853	0	0		0	322.272	0	0		0	351.868	0	0		0	325.56	0	0		0	0.499014	0	0		0	0.565209	0	0
	0	0.538707	0	0		0	293.327	0	0		0	287.686	0	0		0	341.275	0	0		0	0.377941	0	0		0	324.062	0	0		1.3285	353.823	0.375469	248.507		3.55836	327.369	1.08696	271.374		0	0.501786	0	0		0	0.568349	0	0
	0.0043861	0.541683	0.809717	0.000295114		6.05228	294.948	2.05198	377.269		0	289.276	0	0		7.27916	343.161	2.12121	128.152		0	0.380029	0	0		0	325.852	0	0		0	355.778	0	0		0	329.177	0	0		0	0.504558	0	0		0	0.571489	0	0
	0	0.544659	0	0		0	296.568	0	0		0	290.865	0	0		0	345.046	0	0		0.00191059	0.382117	0.5	0.000235432		3.56134	327.643	1.08696	185.312		0	357.732	0	0		0	330.986	0	0		0.0033822	0.507331	0.666667	0.000785797		0	0.57463	0	0
	0	0.547636	0	0		0	298.189	0	0		0	292.455	0	0		0	346.932	0	0		0	0.384205	0	0		0	329.433	0	0		0	359.687	0	0		0	332.795	0	0		0	0.510103	0	0		0	0.57777	0	0
	0.0033438	0.550612	0.607287	0.000201116		0	299.81	0	0		2.09657	294.044	0.713013	74.3317		0	348.817	0	0		0	0.386293	0	0		0	331.224	0	0		0	361.642	0	0		0	334.603	0	0		0	0.512875	0	0		0	0.58091	0	0
	0	0.553588	0	0		0	301.43	0	0		0	295.634	0	0		9.29893	350.702	2.65151	130.611		0	0.388381	0	0		0	333.014	0	0		1.82026	363.597	0.500626	306.644		4.57082	336.412	1.3587	301.5		0	0.515648	0	0		0	0.58405	0	0
	0.00788654	0.556565	1.417	0.000439073		1.65828	303.051	0.547196	88.94		0	297.223	0	0		0	352.588	0	0		0.00184388	0.390469	0.472222	0.000205565		0	334.804	0	0		0	365.552	0	0		0	338.221	0	0		0	0.51842	0	0		0	0.58719	0	0
	0	0.559541	0	0		0	304.671	0	0		0	298.812	0	0		0	354.474	0	0		0	0.392557	0	0		3.65864	336.595	1.08696	160.773		0	367.507	0	0		0	340.029	0	0		0.00173731	0.521192	0.333333	0.000361813		0	0.59033	0	0
	0	0.562517	0	0		0	306.292	0	0		0	300.402	0	0		0	356.359	0	0		0	0.394645	0	0		0	338.385	0	0		0	369.461	0	0		0	341.838	0	0		0	0.523964	0	0		0	0.59347	0	0
	0.00686834	0.565493	1.21457	0.000339136		0	307.913	0	0		4.30647	301.991	1.42603	126.422		9.49891	358.245	2.65151	104.049		0	0.396734	0	0		0	340.176	0	0		0	371.416	0	0		0	343.647	0	0		0	0.526737	0	0		0	0.59661	0	0
	0	0.56847	0	0		0	309.533	0	0		0	303.581	0	0		0	360.13	0	0		0.00232646	0.398822	0.583333	0.000234009		0	341.966	0	0		2.33649	373.371	0.625782	353.627		3.28558	345.455	0.951087	186.203		0	0.529509	0	0		0	0.59975	0	0
	0	0.571446	0	0		3.83089	311.154	1.23119	175.486		0	305.17	0	0		0	362.015	0	0		0	0.40091	0	0		0	343.756	0	0		0	375.326	0	0		0	347.264	0	0		0	0.532281	0	0		0	0.60289	0	0
	0.0011628	0.574422	0.202429	5.06437e-05		0	312.774	0	0		0	306.76	0	0		0	363.901	0	0		0	0.402998	0	0		9.01427	345.547	2.6087	331.142		0	377.281	0	0		0	349.073	0	0		0.00713405	0.535054	1.33333	0.00132803		0.0216439	0.60603	3.57143	0.00303865
	0	0.577399	0	0		0	314.395	0	0		0	308.349	0	0		11.9158	365.786	3.25758	98.9031		0.00326319	0.405086	0.805556	0.000303258		0	347.337	0	0		0	379.235	0	0		0	350.881	0	0		0	0.537826	0	0		0	0.60917	0	0
	0.00587424	0.580375	1.01215	0.000234518		0	316.016	0	0		3.86732	309.938	1.24777	92.7338		0	367.672	0	0		0	0.407174	0	0		0	349.128	0	0		0	381.19	0	0		0	352.69	0	0		0	0.540598	0	0		0	0.61231	0	0
	0	0.583351	0	0		0	317.636	0	0		0	311.528	0	0		0	369.558	0	0		0	0.409262	0	0		0	350.918	0	0		1.43859	383.145	0.375469	195.087		7.22484	354.499	2.03804	349.096		0	0.54337	0	0		0	0.61545	0	0
	0	0.586327	0	0		6.11436	319.257	1.91518	237.18		0	313.117	0	0		0	371.443	0	0		0	0.41135	0	0		0	352.708	0	0		0	385.1	0	0		0	356.307	0	0		0	0.546143	0	0		0	0.61859	0	0
	0.00477169	0.589304	0.809717	0.000166249		0	320.877	0	0		0	314.707	0	0		10.1817	373.328	2.72727	61.6867		0.00378985	0.413438	0.916667	0.000316016		4.6239	354.499	1.30435	140.305		0	387.055	0	0		0	358.116	0	0		0.00548915	0.548915	1	0.000910452		0	0.62173	0	0
	0	0.59228	0	0		0	322.498	0	0		0	316.296	0	0		0	375.214	0	0		0	0.415526	0	0		0	356.289	0	0		0	389.01	0	0		0	359.925	0	0		0	0.551687	0	0		0	0.62487	0	0
	0	0.595256	0	0		0	324.118	0	0		5.66641	317.885	1.78253	109.178		0	377.099	0	0		0	0.417614	0	0		0	358.079	0	0		0	390.964	0	0		0	361.733	0	0		0	0.55446	0	0		0	0.628011	0	0
	0.00363299	0.598232	0.607287	0.000109632		5.34729	325.739	1.64159	180.303		0	319.475	0	0		0	378.985	0	0		0	0.419702	0	0		0	359.87	0	0		2.45882	392.919	0.625782	297.859		5.92732	363.542	1.63044	242.015		0	0.557232	0	0		0	0.631151	0	0
	0	0.601209	0	0		0	327.36	0	0		0	321.064	0	0		0	380.87	0	0		0.00328059	0.42179	0.777778	0.000244554		0	361.66	0	0		0	394.874	0	0		0	365.351	0	0		0	0.560004	0	0		0	0.634291	0	0
	0.00733828	0.604185	1.21457	0.000200266		0	328.98	0	0		0	322.654	0	0		11.8886	382.756	3.10606	45.1622		0	0.423878	0	0		11.0615	363.451	3.04348	273.303		0	396.829	0	0		0	367.159	0	0		0.00562777	0.562777	1	0.000828723		0.00758846	0.637431	1.19048	0.000806544
	0	0.607161	0	0		0	330.601	0	0		0	324.243	0	0		0	384.641	0	0		0	0.425967	0	0		0	365.241	0	0		0	398.784	0	0		0	368.968	0	0		0	0.565549	0	0		0	0.640571	0	0
	0	0.610138	0	0		0	332.221	0	0		5.80807	325.833	1.78253	88.1305		0	386.527	0	0		0	0.428055	0	0		0	367.031	0	0		2.0062	400.738	0.500626	221.513		0	370.777	0	0		0	0.568321	0	0		0	0.643711	0	0
	0.00496449	0.613114	0.809717	0.000115589		5.48031	333.842	1.64159	153.5		0	327.422	0	0		0	388.412	0	0		0.00334555	0.430143	0.777778	0.000222058		0	368.822	0	0		0	402.693	0	0		4.04984	372.585	1.08696	138.281		0	0.571094	0	0		0	0.646851	0	0
	0	0.61609	0	0		0	335.463	0	0		0	329.012	0	0		14.784	390.298	3.78788	35.4435		0	0.432231	0	0		0	370.612	0	0		0	404.648	0	0		0	374.394	0	0		0	0.573866	0	0		0	0.649991	0	0
	0	0.619066	0	0		0	337.083	0	0		0	330.601	0	0		0	392.183	0	0		0	0.434319	0	0		0	372.403	0	0		0	406.603	0	0		0	376.203	0	0		0	0.576638	0	0		0	0.653131	0	0
	0.00881437	0.622043	1.417	0.000173177		0	338.704	0	0		0	332.19	0	0		0	394.069	0	0		0	0.436407	0	0		8.94809	374.193	2.3913	168.812		0	408.558	0	0		0	378.011	0	0		0.00965684	0.57941	1.66667	0.0012262		0	0.656271	0	0
	0	0.625019	0	0		0	340.325	0	0		7.73465	333.78	2.31729	90.1354		0	395.954	0	0		0.00377593	0.438495	0.861111	0.000222146		0	375.983	0	0		3.0827	410.513	0.750939	302.108		0	379.82	0	0		0	0.582183	0	0		0	0.659411	0	0
	0.00381374	0.627995	0.607287	6.64412e-05		9.82332	341.945	2.87278	225.492		0	335.369	0	0		15.3711	397.84	3.86364	20.5229		0	0.440583	0	0		0	377.774	0	0		0	412.467	0	0		0	381.629	0	0		0	0.584955	0	0		0	0.662551	0	0
	0	0.630972	0	0		0	343.566	0	0		0	336.959	0	0		0	399.725	0	0		0	0.442671	0	0		0	379.564	0	0		0	414.422	0	0		9.89852	383.437	2.58152	268.261		0	0.587727	0	0		0.0158498	0.665691	2.38095	0.00128183
	0	0.633948	0	0		0	345.186	0	0		0	338.548	0	0		0	401.611	0	0		0	0.444759	0	0		0	381.355	0	0		0	416.377	0	0		0	385.246	0	0		0	0.5905	0	0		0	0.668831	0	0
	0.00257864	0.636924	0.404858	3.70547e-05		0	346.807	0	0		0	340.137	0	0		0	403.496	0	0		0.00260661	0.446847	0.583333	0.000135242		2.49877	383.145	0.652174	36.7516		0	418.332	0	0		0	387.055	0	0		0.00593272	0.593272	1	0.000662445		0	0.671971	0	0
	0	0.6399	0	0		0	348.427	0	0		7.30966	341.727	2.13904	63.3487		15.9696	405.382	3.93939	9.47095		0	0.448935	0	0		0	384.935	0	0		4.73414	420.287	1.12641	410.073		0	388.863	0	0		0	0.596044	0	0		0	0.675111	0	0
	0	0.642877	0	0		5.26748	350.048	1.50479	97.4974		0	343.316	0	0		0	407.267	0	0		0	0.451023	0	0		0	386.726	0	0		0	422.242	0	0		0	390.672	0	0		0	0.598816	0	0		0.0161488	0.678251	2.38095	0.0011468
	0.00784437	0.645853	1.21457	9.13824e-05		0	351.669	0	0		0	344.906	0	0		0	409.153	0	0		0.00578976	0.453112	1.27778	0.00027237		0	388.516	0	0		0	424.196	0	0		10.132	392.481	2.58152	222.775		0	0.601589	0	0		0	0.681391	0	0
	0	0.648829	0	0		0	353.289	0	0		0	346.495	0	0		0	411.038	0	0		0	0.455199	0	0		0	390.307	0	0		0	426.151	0	0		0	394.289	0	0		0	0.604361	0	0		0	0.684531	0	0
	0.0105556	0.651806	1.61943	0.000105694		0	354.91	0	0		0	348.085	0	0		0	412.924	0	0		0	0.457288	0	0		11.9334	392.097	3.04348	133.042		0	428.106	0	0		0	396.098	0	0		0.0121427	0.607133	2	0.00118603		0	0.687671	0	0
	0	0.654782	0	0		0	356.53	0	0		8.10296	349.674	2.31729	50.0476		14.7697	414.809	3.56061	1.31531		0	0.459376	0	0		0	393.887	0	0		2.153	430.061	0.500626	164.06		0	397.907	0	0		0	0.609906	0	0		0	0.690812	0	0
	0	0.657758	0	0		10.2889	358.151	2.87278	150.543		0	351.263	0	0		0	416.695	0	0		0.00602467	0.461464	1.30556	0.000247361		0	395.678	0	0		0	432.016	0	0		0	399.715	0	0		0	0.612678	0	0		0.00826133	0.693952	1.19048	0.000494297
	0.0107001	0.660734	1.61943	8.36219e-05		0	359.772	0	0		0	352.853	0	0		0	418.58	0	0		0	0.463552	0	0		0	397.468	0	0		0	433.971	0	0		10.3654	401.524	2.58152	181.512		0	0.61545	0	0		0	0.697092	0	0
	0	0.663711	0	0		0	361.392	0	0		0	354.442	0	0		0	420.466	0	0		0	0.46564	0	0		0	399.259	0	0		0	435.925	0	0		0	403.333	0	0		0	0.618223	0	0		0	0.700232	0	0
	0	0.666687	0	0		0	363.013	0	0		0	356.032	0	0		17.598	422.351	4.16667	0.0893199		0	0.467728	0	0		12.2058	401.049	3.04348	99.4534		4.93232	437.88	1.12641	337.936		0	405.141	0	0		0.00620995	0.620995	1	0.000527424		0	0.703372	0	0
	0.00813356	0.669663	1.21457	4.8099e-05		0	364.633	0	0		9.56206	357.621	2.6738	39.6856		0	424.237	0	0		0.00626421	0.469816	1.33333	0.000222896		0	402.839	0	0		0	439.835	0	0		0	406.95	0	0		0	0.623767	0	0		0	0.706512	0	0
	0	0.672639	0	0		6.01238	366.254	1.64159	67.8443		0	359.211	0	0		0	426.122	0	0		0	0.471904	0	0		0	404.63	0	0		0	441.79	0	0		0	408.759	0	0		0	0.626539	0	0		0.0168965	0.709652	2.38095	0.00084212
	0.0109411	0.675616	1.61943	5.25732e-05		0	367.875	0	0		0	360.8	0	0		0	428.008	0	0		0	0.473992	0	0		0	406.42	0	0		0	443.745	0	0		11.1567	410.567	2.71739	152.076		0	0.629312	0	0		0	0.712792	0	0
	0	0.678592	0	0		0	369.495	0	0		0	362.389	0	0		13.6784	429.893	3.18182	2.58073		0	0.47608	0	0		0	408.211	0	0		0	445.699	0	0		0	412.376	0	0		0	0.632084	0	0		0	0.715932	0	0
	0	0.681568	0	0		0	371.116	0	0		0	363.979	0	0		0	431.779	0	0		0.00730535	0.478168	1.52778	0.000223471		9.80437	410.001	2.3913	55.5841		7.84375	447.654	1.75219	468.024		0	414.185	0	0		0.00846475	0.634856	1.33333	0.000620903		0	0.719072	0	0
	0.0110857	0.684545	1.61943	3.73868e-05		0	372.736	0	0		9.77455	365.568	2.6738	25.0016		0	433.664	0	0		0	0.480256	0	0		0	411.791	0	0		0	449.609	0	0		0	415.993	0	0		0	0.637629	0	0		0.0171955	0.722212	2.38095	0.000733393
	0	0.687521	0	0		6.65751	374.357	1.77839	56.1377		0	367.158	0	0		0	435.55	0	0		0	0.482344	0	0		0	413.582	0	0		0	451.564	0	0		0	417.802	0	0		0	0.640401	0	0		0	0.725352	0	0
	0	0.690497	0	0		0	375.978	0	0		0	368.747	0	0		14.2498	437.435	3.25758	8.92057		0	0.484432	0	0		0	415.372	0	0		0	453.519	0	0		11.4025	419.611	2.71739	117.53		0	0.643173	0	0		0	0.728492	0	0
	0.00280758	0.693473	0.404858	6.19568e-06		0	377.598	0	0		0	370.337	0	0		0	439.321	0	0		0.00675723	0.486521	1.38889	0.000176064		0	417.163	0	0		0	455.474	0	0		0	421.419	0	0		0	0.645946	0	0		0	0.731632	0	0
	0	0.69645	0	0		0	379.219	0	0		0	371.926	0	0		0	441.206	0	0		0	0.488609	0	0		0	418.953	0	0		5.72501	457.428	1.25157	295.513		0	423.228	0	0		0	0.648718	0	0		0	0.734772	0	0
	0.00424753	0.699426	0.607287	6.68045e-06		0	380.839	0	0		8.65544	373.515	2.31729	11.869		0	443.092	0	0		0	0.490697	0	0		19.2079	420.743	4.56522	64.0953		0	459.383	0	0		0	425.037	0	0		0	0.65149	0	0		0.00878467	0.737912	1.19048	0.000304024
	0	0.702402	0	0		5.75521	382.46	1.50479	34.7879		0	375.105	0	0		9.77602	444.977	2.19697	12.7497		0.00739177	0.492785	1.5	0.000169579		0	422.534	0	0		0	461.338	0	0		0	426.845	0	0		0	0.654262	0	0		0	0.741052	0	0
	0	0.705379	0	0		0	384.08	0	0		0	376.694	0	0		0	446.863	0	0		0	0.494873	0	0		0	424.324	0	0		0	463.293	0	0		9.31857	428.654	2.17391	69.944		0	0.657035	0	0		0	0.744192	0	0
	0.00286783	0.708355	0.404858	2.37848e-06		0	385.701	0	0		0	378.284	0	0		0	448.748	0	0		0	0.496961	0	0		0	426.115	0	0		0	465.248	0	0		0	430.463	0	0		0	0.659807	0	0		0	0.747332	0	0
	0	0.711331	0	0		0	387.322	0	0		0	379.873	0	0		0	450.634	0	0		0	0.499049	0	0		0	427.905	0	0		9.94048	467.202	2.12766	440.495		0	432.271	0	0		0	0.662579	0	0		0.00893419	0.750472	1.19048	0.000258111
	0	0.714307	0	0		0	388.942	0	0		8.8396	381.463	2.31729	4.99685		0	452.519	0	0		0.00807387	0.501137	1.61111	0.000154649		14.9459	429.695	3.47826	28.2879		0	469.157	0	0		0	434.08	0	0		0.00665352	0.665352	1	0.000343363		0	0.753613	0	0
	0.00725996	0.717284	1.01215	2.3722e-06		10.1514	390.563	2.59918	41.5418		0	383.052	0	0		15.8353	454.405	3.48485	39.1496		0	0.503225	0	0		0	431.486	0	0		0	471.112	0	0		0	435.889	0	0		0	0.668124	0	0		0	0.756753	0	0
	0	0.72026	0	0		0	392.183	0	0		0	384.641	0	0		0	456.29	0	0		0	0.505313	0	0		0	433.276	0	0		0	473.067	0	0		0	437.697	0	0		0	0.670896	0	0		0	0.759893	0	0
	0.0102483	0.723236	1.417	1.24055e-06		0	393.804	0	0		0	386.231	0	0		0	458.176	0	0		0	0.507401	0	0		0	435.067	0	0		0	475.022	0	0		10.1516	439.506	2.30978	48.5998		0	0.673669	0	0		0	0.763033	0	0
	0	0.726213	0	0		0	395.425	0	0		0	387.82	0	0		0	460.061	0	0		0.00820844	0.509489	1.61111	0.000129405		0	436.857	0	0		5.3727	476.976	1.12641	202.596		0	441.315	0	0		0	0.676441	0	0		0	0.766173	0	0
	0	0.729189	0	0		0	397.045	0	0		11.1062	389.41	2.85205	1.2946		16.0981	461.947	3.48485	58.7505		0	0.511577	0	0		13.3501	438.647	3.04348	11.6513		0	478.931	0	0		0	443.123	0	0		0.00679213	0.679213	1	0.000293913		0	0.769313	0	0
	0.00592846	0.732165	0.809717	1.4816e-09		11.4528	398.666	2.87278	29.1885		0	390.999	0	0		0	463.832	0	0		0	0.513665	0	0		0	440.438	0	0		0	480.886	0	0		0	444.932	0	0		0	0.681985	0	0		0	0.772453	0	0
	0	0.735141	0	0		0	400.286	0	0		0	392.589	0	0		0	465.718	0	0		0	0.515754	0	0		0	442.228	0	0		0	482.841	0	0		0	446.741	0	0		0	0.684758	0	0		0	0.775593	0	0
	0	0.738118	0	0		0	401.907	0	0		0	394.178	0	0		0	467.603	0	0		0.0105007	0.517842	2.02778	0.000133929		0	444.019	0	0		6.06753	484.796	1.25157	199.623		12.7983	448.549	2.85326	38.6968		0	0.68753	0	0		0	0.778733	0	0
	0.00900114	0.741094	1.21457	8.77746e-07		0	403.528	0	0		0	395.767	0	0		15.294	469.489	3.25758	76.9475		0	0.51993	0	0		0	445.809	0	0		0	486.751	0	0		0	450.358	0	0		0	0.690302	0	0		0.00930801	0.781873	1.19048	0.000159764
	0	0.74407	0	0		0	405.148	0	0		11.3328	397.357	2.85205	0.0417391		0	471.374	0	0		0	0.522018	0	0		15.5687	447.599	3.47826	3.91843		0	488.705	0	0		0	452.167	0	0		0.0138615	0.693075	2	0.000496612		0	0.785013	0	0
	0.00302448	0.747046	0.404858	8.45769e-07		9.45974	406.769	2.32558	13.1424		0	398.946	0	0		0	473.26	0	0		0	0.524106	0	0		0	449.39	0	0		0	490.66	0	0		0	453.975	0	0		0	0.695847	0	0		0	0.788153	0	0
	0	0.750023	0	0		0	408.389	0	0		0	400.536	0	0		0	475.145	0	0		0.0116932	0.526194	2.22222	0.000118154		0	451.18	0	0		0	492.615	0	0		0	455.784	0	0		0	0.698619	0	0		0	0.791293	0	0
	0	0.752999	0	0		0	410.01	0	0		0	402.125	0	0		16.9852	477.031	3.56061	112.234		0	0.528282	0	0		0	452.971	0	0		14.8557	494.57	3.00375	407.808		18.6519	457.593	4.07609	31.4645		0	0.701392	0	0		0.0189151	0.794433	2.38095	0.000253996
	0.00918189	0.755975	1.21457	6.64055e-06		0	411.63	0	0		0	403.714	0	0		0	478.916	0	0		0	0.53037	0	0		0	454.761	0	0		0	496.525	0	0		0	459.401	0	0		0	0.704164	0	0		0	0.797573	0	0
	0	0.758952	0	0		0	413.251	0	0		8.6696	405.304	2.13904	1.79357		0	480.802	0	0		0.0112408	0.532458	2.11111	9.37885e-05		0	456.551	0	0		0	498.48	0	0		0	461.21	0	0		0	0.706936	0	0		0	0.800713	0	0
	0	0.761928	0	0		14.756	414.872	3.55677	8.73298		0	406.893	0	0		0	482.687	0	0		0	0.534546	0	0		17.9351	458.342	3.91304	0.000645199		0	500.434	0	0		0	463.019	0	0		0.00946278	0.709708	1.33333	0.000264868		0	0.803853	0	0
	0.0170323	0.764904	2.22672	2.32473e-05		0	416.492	0	0		0	408.483	0	0		0	484.573	0	0		0	0.536634	0	0		0	460.132	0	0		0	502.389	0	0		0	464.827	0	0		0	0.712481	0	0		0	0.806993	0	0
	0	0.76788	0	0		0	418.113	0	0		0	410.072	0	0		14.7412	486.458	3.0303	130.29		0	0.538722	0	0		0	461.923	0	0		10.7307	504.344	2.12766	242.434		17.7525	466.636	3.80435	13.3609		0	0.715253	0	0		0.00964444	0.810133	1.19048	9.13228e-05
	0	0.770857	0	0		0	419.733	0	0		0	411.662	0	0		0	488.344	0	0		0.0109664	0.54081	2.02778	6.89235e-05		0	463.713	0	0		0	506.299	0	0		0	468.445	0	0		0	0.718025	0	0		0	0.813274	0	0
	0.0109652	0.773833	1.417	2.40997e-05		9.22253	421.354	2.18878	1.84737		0	413.251	0	0		0	490.229	0	0		0	0.542899	0	0		0	465.503	0	0		0	508.254	0	0		0	470.253	0	0		0	0.720798	0	0		0	0.816414	0	0
	0	0.776809	0	0		0	422.975	0	0		8.87359	414.841	2.13904	7.47475		0	492.115	0	0		0	0.544987	0	0		12.1903	467.294	2.6087	2.15097		0	510.209	0	0		0	472.062	0	0		0.0144714	0.72357	2	0.000322997		0	0.819554	0	0
	0.0173636	0.779786	2.22672	4.95925e-05		0	424.595	0	0		0	416.43	0	0		13.4727	494	2.72727	145.787		0	0.547075	0	0		0	469.084	0	0		0	512.163	0	0		0	473.871	0	0		0	0.726342	0	0		0	0.822694	0	0
	0	0.782762	0	0		0	426.216	0	0		0	418.019	0	0		0	495.886	0	0		0.0112883	0.549163	2.05556	5.1283e-05		0	470.875	0	0		11.5821	514.118	2.25282	211.838		16.1576	475.679	3.39674	3.19403		0	0.729114	0	0		0	0.825834	0	0
	0	0.785738	0	0		0	427.837	0	0		0	419.609	0	0		0	497.771	0	0		0	0.551251	0	0		0	472.665	0	0		0	516.073	0	0		0	477.488	0	0		0	0.731887	0	0		0	0.828974	0	0
	0.00638635	0.788714	0.809717	2.55031e-05		11.7498	429.457	2.73598	0.0321572		0	421.198	0	0		0	499.657	0	0		0	0.553339	0	0		0	474.455	0	0		0	518.028	0	0		0	479.297	0	0		0	0.734659	0	0		0	0.832114	0	0
	0	0.791691	0	0		0	431.078	0	0		7.53632	422.788	1.78253	12.651		12.1586	501.542	2.42424	157.703		0	0.555427	0	0		11.3885	476.246	2.3913	7.77575		0	519.983	0	0		0	481.105	0	0		0.0196648	0.737431	2.66667	0.000341838		0	0.835254	0	0
	0	0.794667	0	0		0	432.698	0	0		0	424.377	0	0		0	503.428	0	0		0.0117698	0.557515	2.11111	3.65273e-05		0	478.036	0	0		13.0648	521.938	2.50313	198.947		0	482.914	0	0		0	0.740204	0	0		0.00998088	0.838394	1.19048	4.18976e-05
	0.00645865	0.797643	0.809717	3.42635e-05		0	434.319	0	0		0	425.967	0	0		0	505.313	0	0		0	0.559603	0	0		0	479.827	0	0		0	523.892	0	0		14.489	484.723	2.98913	0.0127705		0	0.742976	0	0		0	0.841534	0	0
	0	0.80062	0	0		0	435.939	0	0		0	427.556	0	0		0	507.199	0	0		0	0.561691	0	0		0	481.617	0	0		0	525.847	0	0		0	486.531	0	0		0	0.745748	0	0		0	0.844674	0	0
	0.011387	0.803596	1.417	7.14371e-05		13.7673	437.56	3.14637	1.55005		0	429.145	0	0		8.87041	509.084	1.74242	135.538		0	0.563779	0	0		0	483.407	0	0		0	527.802	0	0		0	488.34	0	0		0	0.748521	0	0		0	0.847814	0	0
	0	0.806572	0	0		0	439.181	0	0		11.517	430.735	2.6738	31.987		0	510.97	0	0		0.0150898	0.565867	2.66667	2.94708e-05		15.8217	485.198	3.26087	23.7443		0	529.757	0	0		0	490.149	0	0		0.00751293	0.751293	1	9.87224e-05		0	0.850954	0	0
	0	0.809548	0	0		0	440.801	0	0		0	432.324	0	0		0	512.855	0	0		0	0.567955	0	0		0	486.988	0	0		14.6404	531.712	2.75344	173.486		0	491.957	0	0		0	0.754065	0	0		0.0203356	0.854094	2.38095	4.53112e-05
	0.00986872	0.812525	1.21457	7.76002e-05		0	442.422	0	0		0	433.914	0	0		0	514.741	0	0		0	0.570043	0	0		0	488.779	0	0		0	533.666	0	0		0	493.766	0	0		0	0.756838	0	0		0	0.857234	0	0
	0	0.815501	0	0		0	444.042	0	0		0	435.503	0	0		0	516.626	0	0		0	0.572132	0	0		0	490.569	0	0		0	535.621	0	0		14.8134	495.575	2.98913	3.10884		0	0.75961	0	0		0	0.860374	0	0
	0	0.818477	0	0		12.1932	445.663	2.73598	6.25638		0	437.092	0	0		11.3915	518.512	2.19697	209.383		0.013558	0.57422	2.36111	1.46292e-05		0	492.359	0	0		0	537.576	0	0		0	497.383	0	0		0	0.762382	0	0		0	0.863514	0	0
	0.00498858	0.821453	0.607287	4.79527e-05		0	447.284	0	0		12.5114	438.682	2.85205	51.5999		0	520.397	0	0		0	0.576308	0	0		12.8909	494.15	2.6087	33.6894		0	539.531	0	0		0	499.192	0	0		0.0102021	0.765154	1.33333	9.74646e-05		0	0.866654	0	0
	0	0.82443	0	0		0	448.904	0	0		0	440.271	0	0		0	522.283	0	0		0	0.578396	0	0		0	495.94	0	0		8.13245	541.486	1.50188	72.7594		0	501.001	0	0		0	0.767927	0	0		0	0.869795	0	0
	0.0200989	0.827406	2.42915	0.00021837		0	450.525	0	0		0	441.861	0	0		0	524.168	0	0		0.0156408	0.580484	2.69444	9.34913e-06		0	497.731	0	0		0	543.441	0	0		0	502.809	0	0		0	0.770699	0	0		0	0.872935	0	0
	0	0.830382	0	0		0	452.145	0	0		0	443.45	0	0		8.76757	526.054	1.66667	184.333		0	0.582572	0	0		0	499.521	0	0		0	545.395	0	0		21.2543	504.618	4.21196	15.5944		0	0.773471	0	0		0	0.876075	0	0
	0	0.833359	0	0		11.7942	453.766	2.59918	14.0197		0	445.04	0	0		0	527.939	0	0		0	0.58466	0	0		0	501.311	0	0		0	547.35	0	0		0	506.427	0	0		0	0.776244	0	0		0	0.879215	0	0
	0.0135439	0.836335	1.61943	0.00017429		0	455.387	0	0		12.7381	446.629	2.85205	72.6827		0	529.825	0	0		0	0.586748	0	0		0	503.102	0	0		0	549.305	0	0		0	508.236	0	0		0	0.779016	0	0		0.0420169	0.882355	4.7619	1.12402e-05
	0	0.839311	0	0		0	457.007	0	0		0	448.219	0	0		0	531.71	0	0		0.0155387	0.588836	2.63889	2.78605e-06		24.147	504.892	4.78261	104.209		12.4189	551.26	2.25282	80.6392		0	510.044	0	0		0.0182417	0.781788	2.33333	0.000110652		0	0.885495	0	0
	0	0.842287	0	0		0	458.628	0	0		0	449.808	0	0		5.25511	533.596	0.984849	125.107		0	0.590924	0	0		0	506.683	0	0		0	553.215	0	0		0	511.853	0	0		0	0.78456	0	0		0	0.888635	0	0
	0.00513318	0.845264	0.607287	7.70934e-05		0	460.248	0	0		0	451.397	0	0		0	535.481	0	0		0	0.593012	0	0		0	508.473	0	0		0	555.169	0	0		12.5624	513.661	2.44565	19.5662		0	0.787333	0	0		0	0.891775	0	0
	0	0.84824	0	0		6.31832	461.869	1.36799	13.4258		0	452.987	0	0		0	537.367	0	0		0	0.5951	0	0		0	510.263	0	0		0	557.124	0	0		0	515.47	0	0		0	0.790105	0	0		0.0213075	0.894915	2.38095	1.87135e-07
	0.0137849	0.851216	1.61943	0.000227879		0	463.49	0	0		9.72355	454.576	2.13904	73.026		0	539.252	0	0		0.0127732	0.597188	2.13889	7.90737e-08		0	512.054	0	0		0	559.079	0	0		0	517.279	0	0		0	0.792877	0	0		0	0.898055	0	0
	0	0.854193	0	0		0	465.11	0	0		0	456.166	0	0		9.83887	541.138	1.81818	262.912		0	0.599276	0	0		15.6387	513.844	3.04348	94.1892		8.42604	561.034	1.50188	37.6291		0	519.087	0	0		0.0344782	0.79565	4.33333	0.000131095		0	0.901195	0	0
	0	0.857169	0	0		0	466.731	0	0		0	457.755	0	0		0	543.023	0	0		0	0.601364	0	0		0	515.635	0	0		0	562.989	0	0		0	520.896	0	0		0	0.798422	0	0		0	0.904335	0	0
	0.0121883	0.860145	1.417	0.000230541		0	468.351	0	0		0	459.344	0	0		0	544.909	0	0		0	0.603453	0	0		0	517.425	0	0		0	564.944	0	0		12.7835	522.705	2.44565	34.0777		0	0.801194	0	0		0	0.907475	0	0
	0	0.863121	0	0		12.8583	469.972	2.73598	42.5384		0	460.934	0	0		0	546.794	0	0		0.0137929	0.605541	2.27778	9.41585e-07		0	519.215	0	0		0	566.898	0	0		0	524.513	0	0		0	0.803967	0	0		0.0216813	0.910615	2.38095	3.96011e-06
	0	0.866098	0	0		0	471.592	0	0		13.1914	462.523	2.85205	125.656		7.89766	548.68	1.43939	235.066		0	0.607629	0	0		0	521.006	0	0		13.5272	568.853	2.37797	42.419		0	526.322	0	0		0	0.806739	0	0		0	0.913755	0	0
	0.0105556	0.869074	1.21457	0.00022624		0	473.213	0	0		0	464.113	0	0		0	550.565	0	0		0	0.609717	0	0		19.3207	522.796	3.69565	154.143		0	570.808	0	0		0	528.131	0	0		0.0296821	0.809511	3.66667	6.20609e-05		0	0.916895	0	0
	0	0.87205	0	0		0	474.834	0	0		0	465.702	0	0		0	552.451	0	0		0	0.611805	0	0		0	524.587	0	0		0	572.763	0	0		0	529.939	0	0		0	0.812284	0	0		0	0.920035	0	0
	0.00885655	0.875027	1.01215	0.000205338		0	476.454	0	0		0	467.292	0	0		0	554.336	0	0		0.0160294	0.613893	2.61111	5.70528e-06		0	526.377	0	0		0	574.718	0	0		15.8946	531.748	2.98913	64.2762		0	0.815056	0	0		0	0.923175	0	0
	0	0.878003	0	0		11.772	478.075	2.46238	55.6362		0	468.881	0	0		0	556.222	0	0		0	0.615981	0	0		0	528.167	0	0		0	576.672	0	0		0	533.557	0	0		0	0.817828	0	0		0.0110276	0.926315	1.19048	9.73563e-06
	0	0.880979	0	0		0	479.695	0	0		15.9339	470.471	3.38681	187.086		8.45617	558.107	1.51515	285.293		0	0.618069	0	0		0	529.958	0	0		13.7596	578.627	2.37797	25.0576		0	535.365	0	0		0	0.8206	0	0		0	0.929455	0	0
	0.0125257	0.883955	1.417	0.000324644		0	481.316	0	0		0	472.06	0	0		0	559.993	0	0		0.0170543	0.620157	2.75	1.21806e-05		12.7157	531.748	2.3913	129.306		0	580.582	0	0		0	537.174	0	0		0.0109783	0.823373	1.33333	9.92217e-06		0	0.932596	0	0
	0	0.886932	0	0		0	482.937	0	0		0	473.649	0	0		0	561.878	0	0		0	0.622245	0	0		0	533.539	0	0		0	582.537	0	0		0	538.983	0	0		0	0.826145	0	0		0	0.935736	0	0
	0	0.889908	0	0		0	484.557	0	0		0	475.239	0	0		0	563.764	0	0		0	0.624333	0	0		0	535.329	0	0		0	584.492	0	0		19.104	540.791	3.53261	108.48		0	0.828917	0	0		0.0558855	0.938876	5.95238	0.000100828
	0.0126522	0.892884	1.417	0.000364075		14.6319	486.178	3.00958	93.1596		0	476.828	0	0		2.99966	565.649	0.530303	111.13		0	0.626421	0	0		0	537.119	0	0		0	586.447	0	0		0	542.6	0	0		0	0.83169	0	0		0	0.942016	0	0
	0	0.89586	0	0		0	487.798	0	0		10.2335	478.418	2.13904	144.78		0	567.535	0	0		0.0164111	0.628509	2.61111	2.25667e-05		0	538.91	0	0		14.7284	588.401	2.50313	12.8838		0	544.409	0	0		0	0.834462	0	0		0	0.945156	0	0
	0.00727803	0.898837	0.809717	0.000223781		0	489.419	0	0		0	480.007	0	0		0	569.42	0	0		0	0.630598	0	0		8.22804	540.7	1.52174	103.54		0	590.356	0	0		0	546.217	0	0		0.0223262	0.837234	2.66667	4.8011e-06		0	0.948296	0	0
	0	0.901813	0	0		0	491.04	0	0		0	481.596	0	0		0	571.306	0	0		0	0.632686	0	0		0	542.49	0	0		0	592.311	0	0		0	548.026	0	0		0	0.840006	0	0		0	0.951436	0	0
	0	0.904789	0	0		0	492.66	0	0		0	483.186	0	0		3.47389	573.191	0.606061	140.585		0	0.634774	0	0		0	544.281	0	0		0	594.266	0	0		0	549.835	0	0		0	0.842779	0	0		0.022728	0.954576	2.38095	7.69708e-05
	0.00918791	0.907766	1.01215	0.000310582		8.79022	494.281	1.77839	72.2513		0	484.775	0	0		0	575.077	0	0		0.0176906	0.636862	2.77778	3.95864e-05		0	546.071	0	0		0	596.221	0	0		14.9903	551.643	2.71739	119.329		0	0.845551	0	0		0	0.957716	0	0
	0	0.910742	0	0		0	495.901	0	0		7.80264	486.365	1.60428	130.576		0	576.962	0	0		0	0.63895	0	0		0	547.862	0	0		12.7271	598.176	2.12766	3.54784		0	553.452	0	0		0	0.848323	0	0		0	0.960856	0	0
	0	0.913718	0	0		0	497.522	0	0		0	487.954	0	0		0	578.848	0	0		0	0.641038	0	0		0	549.652	0	0		0	600.13	0	0		0	555.261	0	0		0	0.851096	0	0		0	0.963996	0	0
	0.00742263	0.916694	0.809717	0.000274441		0	499.142	0	0		0	489.544	0	0		2.19975	580.733	0.378788	96.7829		0	0.643126	0	0		14.3855	551.442	2.6087	226.739		0	602.085	0	0		0	557.069	0	0		0.0227698	0.853868	2.66667	2.75779e-07		0.0115135	0.967136	1.19048	5.73668e-05
	0	0.919671	0	0		0	500.763	0	0		0	491.133	0	0		0	582.619	0	0		0.0193564	0.645214	3	6.37645e-05		0	553.233	0	0		0	604.04	0	0		0	558.878	0	0		0	0.85664	0	0		0	0.970276	0	0
	0.00747083	0.922647	0.809717	0.000292475		9.62158	502.384	1.91518	98.8495		0	492.723	0	0		0	584.504	0	0		0	0.647302	0	0		0	555.023	0	0		15.9273	605.995	2.62828	0.681958		19.0451	560.687	3.39674	192.651		0	0.859413	0	0		0	0.973416	0	0
	0	0.925623	0	0		0	504.004	0	0		16.7414	494.312	3.38681	326.364		0	586.39	0	0		0	0.64939	0	0		0	556.814	0	0		0	607.95	0	0		0	562.495	0	0		0	0.862185	0	0		0	0.976556	0	0
	0	0.9286	0	0		0	505.625	0	0		0	495.901	0	0		0	588.275	0	0		0	0.651478	0	0		0	558.604	0	0		0	609.904	0	0		0	564.304	0	0		0	0.864957	0	0		0	0.979696	0	0
	0.00754312	0.931576	0.809717	0.000320601		0	507.245	0	0		0	497.491	0	0		4.47091	590.161	0.757576	217.072		0.0174284	0.653566	2.66667	7.90764e-05		15.8372	560.394	2.82609	295.071		0	611.859	0	0		0	566.113	0	0		0.0231395	0.867729	2.66667	7.77696e-06		0.0234009	0.982836	2.38095	0.000172502
	0	0.934552	0	0		8.35348	508.866	1.64159	100.708		0	499.08	0	0		0	592.046	0	0		0	0.655654	0	0		0	562.185	0	0		0	613.814	0	0		0	567.921	0	0		0	0.870502	0	0		0	0.985976	0	0
	0	0.937528	0	0		0	510.487	0	0		0	500.67	0	0		0	593.932	0	0		0	0.657742	0	0		0	563.975	0	0		10.7894	615.769	1.75219	0.383819		20.9004	569.73	3.66848	261.032		0	0.873274	0	0		0	0.989116	0	0
	0.0209424	0.940505	2.22672	0.000962552		0	512.107	0	0		8.05763	502.259	1.60428	180.638		0	595.817	0	0		0	0.65983	0	0		0	565.766	0	0		0	617.724	0	0		0	571.539	0	0		0	0.876046	0	0		0	0.992257	0	0
	0	0.943481	0	0		0	513.728	0	0		0	503.849	0	0		2.26403	597.703	0.378788	118.423		0.0143416	0.661919	2.16667	8.54702e-05		0	567.556	0	0		0	619.679	0	0		0	573.347	0	0		0	0.878819	0	0		0	0.995397	0	0
	0.00766362	0.946457	0.809717	0.000370348		0	515.348	0	0		0	505.438	0	0		0	599.588	0	0		0	0.664007	0	0		9.90168	569.346	1.73913	214.792		0	621.633	0	0		0	575.156	0	0		0.0117545	0.881591	1.33333	1.27628e-05		0.0118873	0.998537	1.19048	0.000121004
	0	0.949434	0	0		12.0225	516.969	2.32558	173.716		0	507.027	0	0		0	601.474	0	0		0	0.666095	0	0		0	571.137	0	0		0	623.588	0	0		0	576.965	0	0		0	0.884363	0	0		0	1.00168	0	0
	0	0.95241	0	0		0	518.59	0	0		0	508.617	0	0		0	603.359	0	0		0.0167046	0.668183	2.5	0.000119272		0	572.927	0	0		19.5727	625.543	3.12891	6.53722		16.5139	578.774	2.85326	248.89		0	0.887135	0	0		0	1.00482	0	0
	0.00773592	0.955386	0.809717	0.000401918		0	520.21	0	0		10.004	510.206	1.96078	255.088		0.458519	605.245	0.0757576	25.7482		0	0.670271	0	0		0	574.718	0	0		0	627.498	0	0		0	580.582	0	0		0	0.889908	0	0		0	1.00796	0	0
	0	0.958362	0	0		0	521.831	0	0		0	511.796	0	0		0	607.13	0	0		0	0.672359	0	0		0	576.508	0	0		0	629.453	0	0		0	582.391	0	0		0	0.89268	0	0		0.0120369	1.0111	1.19048	0.000153032
	0	0.961339	0	0		0	523.451	0	0		0	513.385	0	0		0	609.016	0	0		0	0.674447	0	0		11.3145	578.298	1.95652	282.139		0	631.408	0	0		0	584.199	0	0		0.0298484	0.895452	3.33333	6.69024e-05		0	1.01424	0	0
	0.00390411	0.964315	0.404858	0.000217389		5.74634	525.072	1.09439	97.7957		0	514.975	0	0		0	610.901	0	0		0.0167254	0.676535	2.47222	0.000148197		0	580.089	0	0		0	633.362	0	0		0	586.008	0	0		0	0.898225	0	0		0	1.01738	0	0
	0	0.967291	0	0		0	526.693	0	0		0	516.564	0	0		1.85693	612.787	0.30303	111.592		0	0.678623	0	0		0	581.879	0	0		13.5174	635.317	2.12766	12.4898		17.5706	587.817	2.98913	313.68		0	0.900997	0	0		0	1.02052	0	0
	0.00589231	0.970268	0.607287	0.000343052		0	528.313	0	0		8.31262	518.153	1.60428	238.805		0	614.672	0	0		0	0.680711	0	0		0	583.67	0	0		0	637.272	0	0		0	589.625	0	0		0	0.903769	0	0		0	1.02366	0	0
	0	0.973244	0	0		0	529.934	0	0		0	519.743	0	0		0	616.558	0	0		0	0.682799	0	0		0	585.46	0	0		0	639.227	0	0		0	591.434	0	0		0	0.906542	0	0		0.0122238	1.0268	1.19048	0.000198349
	0	0.97622	0	0		0	531.554	0	0		0	521.332	0	0		0	618.443	0	0		0.0171222	0.684887	2.5	0.000183939		0	587.25	0	0		0	641.182	0	0		0	593.243	0	0		0	0.909314	0	0		0	1.02994	0	0
	0.0118931	0.979196	1.21457	0.000738623		9.48191	533.175	1.77839	187.33		0	522.922	0	0		1.87978	620.329	0.30303	120.536		0	0.686975	0	0		7.68314	589.041	1.30435	223.25		0	643.136	0	0		0	595.051	0	0		0.0243223	0.912086	2.66667	0.000100644		0	1.03308	0	0
	0	0.982173	0	0		0	534.796	0	0		0	524.511	0	0		0	622.214	0	0		0	0.689064	0	0		0	590.831	0	0		20.1843	645.091	3.12891	36.1759		10.5424	596.86	1.7663	219.527		0	0.914859	0	0		0	1.03622	0	0
	0	0.985149	0	0		0	536.416	0	0		10.3157	526.1	1.96078	331.135		0	624.1	0	0		0	0.691152	0	0		0	592.622	0	0		0	647.046	0	0		0	598.669	0	0		0	0.917631	0	0		0.0247466	1.03936	2.38095	0.000477654
	0.0100013	0.988125	1.01215	0.000660899		0	538.037	0	0		0	527.69	0	0		0	625.985	0	0		0.0144425	0.69324	2.08333	0.000184587		0	594.412	0	0		0	649.001	0	0		0	600.477	0	0		0	0.920403	0	0		0	1.0425	0	0
	0	0.991101	0	0		0	539.657	0	0		0	529.279	0	0		0	627.871	0	0		0	0.695328	0	0		0	596.202	0	0		0	650.956	0	0		0	602.286	0	0		0	0.923175	0	0		0	1.04564	0	0
	0.0120738	0.994078	1.21457	0.000830457		5.9237	541.278	1.09439	134.201		0	530.869	0	0		0	629.756	0	0		0	0.697416	0	0		11.6999	597.993	1.95652	382.271		20.429	652.91	3.12891	54.7269		0	604.095	0	0		0.012346	0.925948	1.33333	7.55925e-05		0	1.04878	0	0
	0	0.997054	0	0		0	542.899	0	0		0	532.458	0	0		0	631.642	0	0		0	0.699504	0	0		0	599.783	0	0		0	654.865	0	0		0	605.903	0	0		0	0.92872	0	0		0	1.05192	0	0
	0	1.00003	0	0		0	544.519	0	0		3.80783	534.048	0.713013	135.59		0	633.527	0	0		0.0136421	0.701592	1.94444	0.000204212		0	601.574	0	0		0	656.82	0	0		12.3854	607.712	2.03804	305.014		0	0.931492	0	0		0.0125602	1.05506	1.19048	0.000294711
	0.00609114	1.00301	0.607287	0.000444072		0	546.14	0	0		0	535.637	0	0		0	635.413	0	0		0	0.70368	0	0		0	603.364	0	0		0	658.775	0	0		0	609.521	0	0		0	0.934265	0	0		0	1.0582	0	0
	0	1.00598	0	0		0	547.76	0	0		0	537.226	0	0		0.965603	637.298	0.151515	70.96		0	0.705768	0	0		0	605.154	0	0		0	660.73	0	0		0	611.329	0	0		0	0.937037	0	0		0	1.06134	0	0
	0	1.00896	0	0		8.26702	549.381	1.50479	212.52		0	538.816	0	0		0	639.184	0	0		0.0151403	0.707856	2.13889	0.000252934		5.27778	606.945	0.869565	192.357		23.223	662.685	3.50438	93.2921		0	613.138	0	0		0.0281943	0.939809	3	0.00023847		0	1.06448	0	0
	0.0143392	1.01194	1.417	0.00110572		0	551.001	0	0		0	540.405	0	0		0	641.069	0	0		0	0.709944	0	0		0	608.735	0	0		0	664.639	0	0		0	614.947	0	0		0	0.942582	0	0		0	1.06762	0	0
	0	1.01491	0	0		0	552.622	0	0		8.6951	541.995	1.60428	341.255		0	642.955	0	0		0	0.712032	0	0		0	610.526	0	0		0	666.594	0	0		9.21781	616.755	1.49456	257.969		0	0.945354	0	0		0	1.07076	0	0
	0.004121	1.01789	0.404858	0.000329528		0	554.243	0	0		0	543.584	0	0		0.488515	644.84	0.0757576	37.9961		0	0.71412	0	0		0	612.316	0	0		0	668.549	0	0		0	618.564	0	0		0	0.948126	0	0		0	1.0739	0	0
	0	1.02086	0	0		0	555.863	0	0		0	545.174	0	0		0	646.726	0	0		0.01134	0.716208	1.58333	0.000217103		0	614.106	0	0		0	670.504	0	0		0	620.373	0	0		0	0.950898	0	0		0	1.07704	0	0
	0	1.02384	0	0		9.15158	557.484	1.64159	264.533		0	546.763	0	0		0	648.611	0	0		0	0.718297	0	0		8.03344	615.897	1.30435	324.314		14.3076	672.459	2.12766	80.1341		0	622.182	0	0		0.0254312	0.953671	2.66667	0.000283009		0	1.08018	0	0
	0.00207858	1.02682	0.202429	0.000175239		0	559.104	0	0		0	548.352	0	0		0	650.496	0	0		0	0.720385	0	0		0	617.687	0	0		0	674.414	0	0		0	623.99	0	0		0	0.956443	0	0		0.0257933	1.08332	2.38095	0.000820171
	0	1.02979	0	0		0	560.725	0	0		2.94087	549.942	0.534759	126.486		0.494229	652.382	0.0757576	40.5984		0	0.722473	0	0		0	619.478	0	0		0	676.368	0	0		5.10162	625.799	0.815217	160.748		0	0.959215	0	0		0	1.08646	0	0
	0	1.03277	0	0		0	562.346	0	0		0	551.531	0	0		0	654.268	0	0		0.0118747	0.724561	1.63889	0.000257922		0	621.268	0	0		0	678.323	0	0		0	627.607	0	0		0	0.961988	0	0		0	1.0896	0	0
	0.00628996	1.03575	0.607287	0.000558108		0	563.966	0	0		0	553.121	0	0		0	656.153	0	0		0	0.726649	0	0		0	623.058	0	0		0	680.278	0	0		0	629.416	0	0		0	0.96476	0	0		0	1.09274	0	0
	0	1.03872	0	0		12.3795	565.587	2.18878	399.176		0	554.71	0	0		0	658.039	0	0		0	0.728737	0	0		6.79184	624.849	1.08696	301.819		13.6617	682.233	2.0025	101.357		0	631.225	0	0		0.0322511	0.967532	3.33333	0.000455366		0	1.09588	0	0
	0.0042174	1.0417	0.404858	0.000386826		0	567.207	0	0		0	556.3	0	0		0	659.924	0	0		0	0.730825	0	0		0	626.639	0	0		0	684.188	0	0		0	633.034	0	0		0	0.970305	0	0		0	1.09902	0	0
	0	1.04468	0	0		0	568.828	0	0		7.95564	557.889	1.42603	373.055		0.501371	661.81	0.0757576	43.9724		0.0138439	0.732913	1.88889	0.000338167		0	628.43	0	0		0	686.143	0	0		5.17534	634.842	0.815217	182.119		0	0.973077	0	0		0	1.10216	0	0
	0	1.04765	0	0		0	570.449	0	0		0	559.478	0	0		0	663.695	0	0		0	0.735001	0	0		0	630.22	0	0		0	688.097	0	0		0	636.651	0	0		0	0.975849	0	0		0	1.1053	0	0
	0.0106339	1.05063	1.01215	0.00102374		0	572.069	0	0		0	561.068	0	0		0	665.581	0	0		0	0.737089	0	0		0	632.01	0	0		25.9093	690.052	3.75469	234.114		0	638.46	0	0		0	0.978621	0	0		0	1.10844	0	0
	0	1.0536	0	0		9.41762	573.69	1.64159	336.386		0	562.657	0	0		0	667.466	0	0		0	0.739177	0	0		0	633.801	0	0		0	692.007	0	0		0	640.268	0	0		0	0.981394	0	0		0	1.11158	0	0
	0	1.05658	0	0		0	575.31	0	0		0	564.247	0	0		1.52125	669.351	0.227273	140.306		0.0107072	0.741265	1.44444	0.00029189		5.52688	635.591	0.869565	273.59		0	693.962	0	0		0	642.077	0	0		0.0328055	0.984166	3.33333	0.000594198		0	1.11472	0	0
	0.0107243	1.05956	1.01215	0.00108203		0	576.931	0	0		5.0431	565.836	0.891266	256.635		0	671.237	0	0		0	0.743353	0	0		0	637.382	0	0		0	695.917	0	0		6.99876	643.885	1.08696	273.099		0	0.986938	0	0		0	1.11786	0	0
	0	1.06253	0	0		0	578.552	0	0		0	567.426	0	0		0	673.122	0	0		0	0.745441	0	0		0	639.172	0	0		0	697.871	0	0		0	645.694	0	0		0	0.989711	0	0		0	1.121	0	0
	0	1.06551	0	0		0	580.172	0	0		0	569.015	0	0		0	675.008	0	0		0.0101747	0.747529	1.36111	0.000299826		0	640.962	0	0		13.1382	699.826	1.87735	147.829		0	647.503	0	0		0	0.992483	0	0		0	1.12414	0	0
	0.00216293	1.06848	0.202429	0.000228388		5.5712	581.793	0.957592	219.069		0	570.604	0	0		1.0256	676.894	0.151515	99.3018		0	0.749618	0	0		0	642.753	0	0		0	701.781	0	0		0	649.311	0	0		0	0.995255	0	0		0	1.12728	0	0
	0	1.07146	0	0		0	583.413	0	0		0	572.194	0	0		0	678.779	0	0		0	0.751706	0	0		12.6106	644.543	1.95652	679.281		0	703.736	0	0		0	651.12	0	0		0.0232873	0.998027	2.33333	0.000506789		0	1.13042	0	0
	0.00652492	1.07444	0.607287	0.00070966		0	585.034	0	0		6.13672	573.783	1.06952	337.483		0	680.664	0	0		0	0.753794	0	0		0	646.334	0	0		0	705.691	0	0		11.5327	652.929	1.7663	495.869		0	1.0008	0	0		0	1.13356	0	0
	0	1.07741	0	0		0	586.655	0	0		0	575.373	0	0		0	682.55	0	0		0.00776879	0.755882	1.02778	0.000252597		0	648.124	0	0		0	707.646	0	0		0	654.737	0	0		0	1.00357	0	0		0	1.1367	0	0
	0	1.08039	0	0		0	588.275	0	0		0	576.962	0	0		0.518512	684.436	0.0757576	52.6194		0	0.75797	0	0		0	649.914	0	0		22.2028	709.6	3.12891	303.647		0	656.546	0	0		0	1.00634	0	0		0	1.13984	0	0
	0.0043861	1.08337	0.404858	0.000498145		11.2976	589.896	1.91518	486.34		0	578.552	0	0		0	686.321	0	0		0	0.760058	0	0		0	651.705	0	0		0	711.555	0	0		0	658.355	0	0		0	1.00912	0	0		0.0408207	1.14298	3.57143	0.00214831
	0	1.08634	0	0		0	591.516	0	0		0	580.141	0	0		0	688.207	0	0		0	0.762146	0	0		5.68257	653.495	0.869565	331.609		0	713.51	0	0		0	660.163	0	0		0.0269837	1.01189	2.66667	0.000693263		0	1.14612	0	0
	0	1.08932	0	0		0	593.137	0	0		4.14781	581.73	0.713013	245.57		0	690.092	0	0		0.00934064	0.764234	1.22222	0.000333246		0	655.286	0	0		0	715.465	0	0		4.49709	661.972	0.679348	211.862		0	1.01466	0	0		0	1.14926	0	0
	0.0110556	1.0923	1.01215	0.00130957		0	594.758	0	0		0	583.32	0	0		1.04845	691.977	0.151515	111.348		0	0.766322	0	0		0	657.076	0	0		0	717.42	0	0		0	663.781	0	0		0	1.01743	0	0		0	1.1524	0	0
	0	1.09527	0	0		0	596.378	0	0		0	584.909	0	0		0	693.863	0	0		0	0.76841	0	0		0	658.866	0	0		28.811	719.374	4.00501	469.62		0	665.59	0	0		0	1.02021	0	0		0.0137564	1.15554	1.19048	0.000791327
	0.00444635	1.09825	0.404858	0.00054131		8.99861	597.999	1.50479	421.973		0	586.499	0	0		0	695.749	0	0		0	0.770498	0	0		0	660.657	0	0		0	721.329	0	0		0	667.398	0	0		0	1.02298	0	0		0	1.15868	0	0
	0	1.10122	0	0		0	599.619	0	0		0	588.088	0	0		0	697.634	0	0		0.00901351	0.772586	1.16667	0.000351092		1.4401	662.447	0.217391	90.677		0	723.284	0	0		0	669.207	0	0		0.020515	1.02575	2	0.000613186		0	1.16182	0	0
	0	1.1042	0	0		0	601.24	0	0		3.15336	589.678	0.534759	200.289		0	699.519	0	0		0	0.774674	0	0		0	664.238	0	0		0	725.239	0	0		0	671.015	0	0		0	1.02852	0	0		0	1.16496	0	0
	0	1.10718	0	0		0	602.861	0	0		0	591.267	0	0		0.531367	701.405	0.0757576	59.6138		0	0.776763	0	0		0	666.028	0	0		0	727.194	0	0		5.48498	672.824	0.815217	286.44		0	1.0313	0	0		0	1.1681	0	0
	0	1.11015	0	0		6.61539	604.481	1.09439	331.109		0	592.856	0	0		0	703.29	0	0		0	0.778851	0	0		0	667.818	0	0		14.6012	729.149	2.0025	279.112		0	674.633	0	0		0	1.03407	0	0		0.0139433	1.17124	1.19048	0.000890643
	0	1.11313	0	0		0	606.102	0	0		0	594.446	0	0		0	705.176	0	0		0.00542319	0.780939	0.694445	0.000229592		0	669.609	0	0		0	731.103	0	0		0	676.442	0	0		0	1.03684	0	0		0	1.17438	0	0
	0.00451864	1.1161	0.404858	0.000595472		0	607.722	0	0		0	596.035	0	0		0	707.061	0	0		0	0.783027	0	0		2.91913	671.399	0.434783	197.601		0	733.058	0	0		0	678.25	0	0		0.0242576	1.03961	2.33333	0.000833137		0	1.17752	0	0
	0	1.11908	0	0		0	609.343	0	0		4.26114	597.625	0.713013	289.435		0.537081	708.947	0.0757576	62.8624		0	0.785115	0	0		0	673.19	0	0		0	735.013	0	0		0	680.059	0	0		0	1.04238	0	0		0	1.18066	0	0
	0.00227137	1.12206	0.202429	0.000307051		0	610.963	0	0		0	599.214	0	0		0	710.832	0	0		0	0.787203	0	0		0	674.98	0	0		11.9907	736.968	1.62703	257.813		3.7058	681.867	0.543478	209.83		0	1.04516	0	0		0.0140929	1.1838	1.19048	0.000974317
	0	1.12503	0	0		6.70406	612.584	1.09439	362.677		0	600.804	0	0		0	712.718	0	0		0.0046042	0.789291	0.583333	0.000210982		0	676.77	0	0		0	738.923	0	0		0	683.676	0	0		0	1.04793	0	0		0	1.18694	0	0
	0	1.12801	0	0		0	614.205	0	0		0	602.393	0	0		0	714.603	0	0		0	0.791379	0	0		0	678.561	0	0		0	740.878	0	0		0	685.485	0	0		0	1.0507	0	0		0	1.19008	0	0
	0.00457889	1.13099	0.404858	0.000642583		0	615.825	0	0		0	603.982	0	0		0	716.489	0	0		0	0.793467	0	0		0	680.351	0	0		0	742.832	0	0		0	687.293	0	0		0	1.05347	0	0		0	1.19322	0	0
	0	1.13396	0	0		0	617.446	0	0		5.39725	605.572	0.891266	390.898		0	718.374	0	0		0.00464074	0.795555	0.583333	0.00022511		1.48292	682.142	0.217391	109.008		0	744.787	0	0		0	689.102	0	0		0.0211249	1.05625	2	0.000845377		0	1.19636	0	0
	0	1.13694	0	0		0	619.066	0	0		0	607.161	0	0		0	720.26	0	0		0	0.797643	0	0		0	683.932	0	0		13.0843	746.742	1.75219	322.435		0.938738	690.911	0.13587	57.3973		0	1.05902	0	0		0.0142798	1.1995	1.19048	0.00108419
	0.00230752	1.13992	0.202429	0.000335855		4.24546	620.687	0.683994	247.301		0	608.751	0	0		0	722.145	0	0		0	0.799731	0	0		0	685.722	0	0		0	748.697	0	0		0	692.72	0	0		0	1.06179	0	0		0	1.20264	0	0
	0	1.14289	0	0		0	622.308	0	0		0	610.34	0	0		0	724.031	0	0		0	0.801819	0	0		0	687.513	0	0		0	750.652	0	0		0	694.528	0	0		0	1.06456	0	0		0	1.20578	0	0
	0.00695871	1.14587	0.607287	0.00103722		0	623.928	0	0		0	611.93	0	0		0	725.916	0	0		0.00468946	0.803907	0.583333	0.000244659		0	689.303	0	0		0	752.606	0	0		0	696.337	0	0		0	1.06733	0	0		0	1.20892	0	0
	0	1.14884	0	0		0	625.549	0	0		3.28085	613.519	0.534759	252.677		0	727.802	0	0		0	0.805995	0	0		4.50713	691.093	0.652174	353.694		0	754.561	0	0		0	698.145	0	0		0.0142681	1.07011	1.33333	0.00064214		0	1.21206	0	0
	0	1.15182	0	0		0	627.169	0	0		0	615.108	0	0		0	729.687	0	0		0	0.808084	0	0		0	692.884	0	0		18.9366	756.516	2.50313	529.391		4.75512	699.954	0.679348	312.796		0	1.07288	0	0		0.0289333	1.2152	2.38095	0.00239987
	0.00467529	1.1548	0.404858	0.000721686		7.7416	628.79	1.23119	483.889		0	616.698	0	0		0	731.573	0	0		0	0.810172	0	0		0	694.674	0	0		0	758.471	0	0		0	701.763	0	0		0	1.07565	0	0		0	1.21834	0	0
	0	1.15777	0	0		0	630.41	0	0		0	618.287	0	0		0	733.458	0	0		0.00338442	0.81226	0.416667	0.000189301		0	696.465	0	0		0	760.426	0	0		0	703.571	0	0		0	1.07842	0	0		0	1.22148	0	0
	0	1.16075	0	0		0	632.031	0	0		0	619.877	0	0		0	735.344	0	0		0	0.814348	0	0		0	698.255	0	0		0	762.381	0	0		0	705.38	0	0		0	1.0812	0	0		0	1.22462	0	0
	0.00235572	1.16373	0.202429	0.000376267		0	633.652	0	0		2.21557	621.466	0.356506	180.993		0	737.229	0	0		0	0.816436	0	0		3.04368	700.046	0.434783	254.273		0	764.335	0	0		0	707.189	0	0		0.0216794	1.08397	2	0.00108874		0.0146162	1.22776	1.19048	0.00129676
	0	1.1667	0	0		0	635.272	0	0		0	623.056	0	0		0	739.115	0	0		0	0.818524	0	0		0	701.836	0	0		10.5497	766.29	1.37672	331.618		1.92662	708.997	0.271739	135.887		0	1.08674	0	0		0	1.2309	0	0
	0.00710331	1.16968	0.607287	0.00116018		2.61379	636.893	0.410397	174.751		0	624.645	0	0		0	741	0	0		0.00296332	0.820612	0.361111	0.000177171		0	703.626	0	0		0	768.245	0	0		0	710.806	0	0		0	1.08951	0	0		0	1.23404	0	0
	0	1.17266	0	0		0	638.514	0	0		0	626.234	0	0		0	742.886	0	0		0	0.8227	0	0		0	705.417	0	0		0	770.2	0	0		0	712.615	0	0		0	1.09229	0	0		0	1.23718	0	0
	0	1.17563	0	0		0	640.134	0	0		0	627.824	0	0		0	744.771	0	0		0	0.824788	0	0		0	707.207	0	0		0	772.155	0	0		0	714.423	0	0		0	1.09506	0	0		0	1.24032	0	0
	0.00715753	1.17861	0.607287	0.00120807		0	641.755	0	0		0	629.413	0	0		0	746.657	0	0		0	0.826876	0	0		3.0826	708.997	0.434783	273.446		15.5016	774.11	2.0025	532.181		0	716.232	0	0		0.0219566	1.09783	2	0.00122194		0	1.24346	0	0
	0	1.18158	0	0		0	643.375	0	0		0	631.003	0	0		0	748.542	0	0		0.00368428	0.828964	0.444444	0.000234811		0	710.788	0	0		0	776.064	0	0		3.9024	718.041	0.543478	294.2		0	1.1006	0	0		0	1.2466	0	0
	0	1.18456	0	0		3.52939	644.996	0.547196	251.66		0	632.592	0	0		0	750.428	0	0		0	0.831052	0	0		0	712.578	0	0		0	778.019	0	0		0	719.85	0	0		0	1.10337	0	0		0	1.24974	0	0
	0.00240392	1.18754	0.202429	0.000418974		0	646.616	0	0		0	634.182	0	0		0	752.313	0	0		0	0.83314	0	0		0	714.369	0	0		0	779.974	0	0		0	721.658	0	0		0	1.10615	0	0		0	1.25288	0	0
	0	1.19051	0	0		0	648.237	0	0		0	635.771	0	0		0	754.199	0	0		0.0030161	0.835229	0.361111	0.000201325		0	716.159	0	0		0	781.929	0	0		0	723.467	0	0		0	1.10892	0	0		0	1.25602	0	0
	0.00241597	1.19349	0.202429	0.000430011		0	649.858	0	0		1.13611	637.36	0.178253	103.715		0	756.084	0	0		0	0.837317	0	0		0	717.949	0	0		9.81081	783.884	1.25157	373.694		0	725.275	0	0		0	1.11169	0	0		0.02998	1.25916	2.38095	0.00311049
	0	1.19646	0	0		0	651.478	0	0		0	638.95	0	0		0	757.97	0	0		0	0.839405	0	0		1.56465	719.74	0.217391	148.687		0	785.838	0	0		0	727.084	0	0		0.0148595	1.11446	1.33333	0.000927956		0	1.2623	0	0
	0	1.19944	0	0		2.6803	653.099	0.410397	203.277		0	640.539	0	0		0	759.855	0	0		0	0.841493	0	0		0	721.53	0	0		0	787.793	0	0		1.98069	728.893	0.271739	161.142		0	1.11724	0	0		0	1.26544	0	0
	0	1.20242	0	0		0	654.719	0	0		0	642.129	0	0		0	761.741	0	0		0.00304626	0.843581	0.361111	0.00021582		0	723.321	0	0		0	789.748	0	0		0	730.702	0	0		0	1.12001	0	0		0	1.26858	0	0
	0	1.20539	0	0		0	656.34	0	0		0	643.718	0	0		0	763.626	0	0		0	0.845669	0	0		0	725.111	0	0		0	791.703	0	0		0	732.51	0	0		0	1.12278	0	0		0	1.27172	0	0
	0	1.20837	0	0		0	657.961	0	0		2.30056	645.308	0.356506	221.322		0	765.512	0	0		0	0.847757	0	0		0	726.901	0	0		9.93314	793.658	1.25157	417.165		0	734.319	0	0		0	1.12555	0	0		0	1.27486	0	0
	0.00490423	1.21135	0.404858	0.000927954		0	659.581	0	0		0	646.897	0	0		0	767.397	0	0		0	0.849845	0	0		0	728.692	0	0		0	795.613	0	0		0	736.128	0	0		0.0112832	1.12833	1	0.000771023		0	1.278	0	0
	0	1.21432	0	0		0.904517	661.202	0.136799	72.783		0	648.486	0	0		0	769.283	0	0		0.00141989	0.851933	0.166667	0.000106532		0	730.482	0	0		0	797.567	0	0		2.00526	737.936	0.271739	173.333		0	1.1311	0	0		0	1.28114	0	0
	0	1.2173	0	0		0	662.822	0	0		0	650.076	0	0		0	771.168	0	0		0	0.854021	0	0		0	732.273	0	0		0	799.522	0	0		0	739.745	0	0		0	1.13387	0	0		0	1.28428	0	0
	0	1.22027	0	0		0	664.443	0	0		0	651.665	0	0		0	773.054	0	0		0	0.856109	0	0		0	734.063	0	0		0	801.477	0	0		0	741.553	0	0		0	1.13664	0	0		0.0459793	1.28742	3.57143	0.00542386
	0	1.22325	0	0		0	666.064	0	0		1.16445	653.255	0.178253	117.833		0	774.939	0	0		0	0.858197	0	0		0	735.854	0	0		9.04992	803.432	1.12641	416.725		0	743.362	0	0		0	1.13942	0	0		0	1.29056	0	0
	0	1.22623	0	0		0	667.684	0	0		0	654.844	0	0		0	776.825	0	0		0.00238968	0.860285	0.277778	0.000189478		0	737.644	0	0		0	805.387	0	0		0	745.171	0	0		0.00761458	1.14219	0.666667	0.000566618		0	1.2937	0	0
	0	1.2292	0	0		2.7468	669.305	0.410397	233.959		0	656.433	0	0		0	778.71	0	0		0	0.862373	0	0		0	739.434	0	0		0	807.341	0	0		0	746.98	0	0		0	1.14496	0	0		0	1.29684	0	0
	0	1.23218	0	0		0	670.925	0	0		0	658.023	0	0		0	780.596	0	0		0	0.864461	0	0		0	741.225	0	0		0	809.296	0	0		0	748.788	0	0		0	1.14773	0	0		0	1.29998	0	0
	0	1.23516	0	0		0	672.546	0	0		0	659.612	0	0		0	782.481	0	0		0	0.86655	0	0		0	743.015	0	0		4.06133	811.251	0.500626	200.576		0	750.597	0	0		0	1.1505	0	0		0	1.30312	0	0
	0	1.23813	0	0		0	674.167	0	0		0	661.202	0	0		0	784.367	0	0		0.00241288	0.868638	0.277778	0.00020179		0	744.805	0	0		0	813.206	0	0		0	752.405	0	0		0	1.15328	0	0		0	1.30626	0	0
	0.00251237	1.24111	0.202429	0.000523459		0	675.787	0	0		0	662.791	0	0		0	786.252	0	0		0	0.870726	0	0		0	746.596	0	0		0	815.161	0	0		0	754.214	0	0		0.015414	1.15605	1.33333	0.00124356		0	1.3094	0	0
	0	1.24409	0	0		3.70675	677.408	0.547196	333.478		0	664.381	0	0		0	788.138	0	0		0	0.872814	0	0		0	748.386	0	0		0	817.116	0	0		5.13602	756.023	0.679348	497.619		0	1.15882	0	0		0	1.31254	0	0
	0	1.24706	0	0		0	679.028	0	0		0	665.97	0	0		0	790.023	0	0		0.000972113	0.874902	0.111111	8.45116e-05		0	750.177	0	0		0	819.07	0	0		0	757.831	0	0		0	1.16159	0	0		0	1.31568	0	0
	0	1.25004	0	0		0	680.649	0	0		0	667.559	0	0		0	791.909	0	0		0	0.87699	0	0		0	751.967	0	0		5.13783	821.025	0.625782	275.803		0	759.64	0	0		0	1.16437	0	0		0	1.31882	0	0
	0	1.25301	0	0		0	682.269	0	0		2.38556	669.149	0.356506	265.704		0	793.794	0	0		0	0.879078	0	0		0	753.757	0	0		0	822.98	0	0		0	761.449	0	0		0	1.16714	0	0		0	1.32196	0	0
	0	1.25599	0	0		0	683.89	0	0		0	670.738	0	0		0	795.68	0	0		0	0.881166	0	0		0	755.548	0	0		0	824.935	0	0		0	763.258	0	0		0.0155988	1.16991	1.33333	0.00135901		0	1.3251	0	0
	0.00254852	1.25897	0.202429	0.00056087		1.87554	685.511	0.273598	177.864		0	672.328	0	0		0	797.565	0	0		0.00196279	0.883254	0.222222	0.000179416		0	757.338	0	0		0	826.89	0	0		0	765.066	0	0		0	1.17268	0	0		0	1.32824	0	0
	0	1.26194	0	0		0	687.131	0	0		0	673.917	0	0		0	799.451	0	0		0	0.885342	0	0		0	759.129	0	0		0	828.845	0	0		0	766.875	0	0		0	1.17545	0	0		0.0158498	1.33138	1.19048	0.00223886
	0	1.26492	0	0		0	688.752	0	0		0	675.507	0	0		0	801.336	0	0		0	0.88743	0	0		0	760.919	0	0		2.0796	830.799	0.250313	120.833		0	768.683	0	0		0	1.17823	0	0		0	1.33452	0	0
	0	1.2679	0	0		0	690.372	0	0		1.20694	677.096	0.178253	140.699		0	803.222	0	0		0	0.889518	0	0		0	762.709	0	0		0	832.754	0	0		0	770.492	0	0		0	1.181	0	0		0	1.33766	0	0
	0	1.27087	0	0		0.946639	691.993	0.136799	93.5118		0	678.686	0	0		0.60993	805.107	0.0757576	111.837		0.000990674	0.891606	0.111111	9.50594e-05		0	764.5	0	0		0	834.709	0	0		0	772.301	0	0		0	1.18377	0	0		0	1.3408	0	0
	0	1.27385	0	0		0	693.614	0	0		0	680.275	0	0		0	806.993	0	0		0	0.893694	0	0		0	766.29	0	0		0	836.664	0	0		2.10356	774.11	0.271739	226.54		0.0118654	1.18654	1	0.00112823		0	1.34394	0	0
	0	1.27683	0	0		0	695.234	0	0		0	681.864	0	0		0	808.878	0	0		0	0.895783	0	0		0	768.081	0	0		0	838.619	0	0		0	775.918	0	0		0	1.18932	0	0		0	1.34708	0	0
	0	1.2798	0	0		0	696.855	0	0		0	683.454	0	0		0	810.764	0	0		0	0.897871	0	0		0	769.871	0	0		5.26016	840.573	0.625782	329.557		0	777.727	0	0		0	1.19209	0	0		0	1.35022	0	0
	0	1.28278	0	0		0	698.475	0	0		1.22111	685.043	0.178253	148.772		0	812.649	0	0		0.000499977	0.899959	0.0555556	5.02829e-05		0	771.661	0	0		0	842.528	0	0		0	779.535	0	0		0	1.19486	0	0		0	1.35336	0	0
	0	1.28575	0	0		0	700.096	0	0		0	686.633	0	0		0	814.535	0	0		0	0.902047	0	0		0	773.452	0	0		0	844.483	0	0		0	781.344	0	0		0	1.19763	0	0		0	1.3565	0	0
	0.00260876	1.28873	0.202429	0.000626088		0	701.717	0	0		0	688.222	0	0		0	816.42	0	0		0	0.904135	0	0		0	775.242	0	0		0	846.438	0	0		0	783.153	0	0		0	1.2004	0	0		0.0161862	1.35964	1.19048	0.00254017
	0	1.29171	0	0		0	703.337	0	0		0	689.812	0	0		0	818.306	0	0		0	0.906223	0	0		0	777.033	0	0		0	848.393	0	0		0	784.962	0	0		0	1.20318	0	0		0	1.36278	0	0
	0	1.29468	0	0		0	704.958	0	0		0	691.401	0	0		0	820.191	0	0		0.000252309	0.908311	0.0277778	2.65568e-05		0	778.823	0	0		3.19279	850.348	0.375469	214.937		0	786.77	0	0		0	1.20595	0	0		0	1.36592	0	0
	0	1.29766	0	0		0	706.578	0	0		1.23528	692.99	0.178253	157.069		0	822.077	0	0		0	0.910399	0	0		0	780.613	0	0		0	852.302	0	0		0	788.579	0	0		0	1.20872	0	0		0	1.36906	0	0
	0	1.30063	0	0		2.90642	708.199	0.410397	316.391		0	694.58	0	0		0	823.962	0	0		0	0.912487	0	0		0	782.404	0	0		0	854.257	0	0		0	790.388	0	0		0	1.21149	0	0		0	1.3722	0	0
	0	1.30361	0	0		0	709.82	0	0		0	696.169	0	0		0	825.848	0	0		0	0.914575	0	0		1.70477	784.194	0.217391	231.008		0	856.212	0	0		0	792.196	0	0		0.00404756	1.21427	0.333333	0.000440719		0	1.37534	0	0
	0	1.30659	0	0		0	711.44	0	0		0	697.759	0	0		0.627071	827.733	0.0757576	125.397		0.000763886	0.916663	0.0833333	8.40328e-05		0	785.985	0	0		2.1481	858.167	0.250313	152.81		0	794.005	0	0		0	1.21704	0	0		0	1.37848	0	0
	0	1.30956	0	0		0	713.061	0	0		0	699.348	0	0		0	829.619	0	0		0	0.918751	0	0		0	787.775	0	0		0	860.122	0	0		0	795.813	0	0		0	1.21981	0	0		0	1.38162	0	0
	0	1.31254	0	0		0	714.681	0	0		1.24944	700.937	0.178253	165.592		0	831.504	0	0		0	0.920839	0	0		0	789.565	0	0		0	862.077	0	0		0	797.622	0	0		0	1.22258	0	0		0	1.38476	0	0
	0	1.31552	0	0		0.979893	716.302	0.136799	111.709		0	702.527	0	0		0	833.39	0	0		0.000769106	0.922927	0.0833333	8.73808e-05		0	791.356	0	0		0	864.031	0	0		0	799.431	0	0		0	1.22536	0	0		0.0165227	1.3879	1.19048	0.00286049
	0	1.31849	0	0		0	717.923	0	0		0	704.116	0	0		0	835.275	0	0		0	0.925016	0	0		0	793.146	0	0		0	865.986	0	0		0	801.24	0	0		0.0122813	1.22813	1	0.00142488		0	1.39104	0	0
	0	1.32147	0	0		0	719.543	0	0		0	705.706	0	0		0	837.161	0	0		0	0.927104	0	0		0	794.937	0	0		2.17257	867.941	0.250313	165.139		1.0911	803.048	0.13587	137.113		0	1.2309	0	0		0	1.39418	0	0
	0	1.32445	0	0		0	721.164	0	0		0	707.295	0	0		0	839.046	0	0		0	0.929192	0	0		0	796.727	0	0		0	869.896	0	0		0	804.857	0	0		0	1.23367	0	0		0	1.39732	0	0
	0	1.32742	0	0		0	722.784	0	0		0	708.885	0	0		0	840.932	0	0		0.000776066	0.93128	0.0833333	9.19466e-05		0	798.517	0	0		0	871.851	0	0		0	806.666	0	0		0	1.23645	0	0		0	1.40046	0	0
	0	1.3304	0	0		0.990978	724.405	0.136799	118.134		0	710.474	0	0		0	842.817	0	0		0	0.933368	0	0		0	800.308	0	0		0	873.805	0	0		0	808.474	0	0		0	1.23922	0	0		0	1.4036	0	0
	0	1.33337	0	0		0	726.025	0	0		0	712.063	0	0		0	844.703	0	0		0	0.935456	0	0		0	802.098	0	0		0	875.76	0	0		0	810.283	0	0		0	1.24199	0	0		0	1.40674	0	0
	0	1.33635	0	0		0	727.646	0	0		0	713.653	0	0		0	846.588	0	0		0	0.937544	0	0		0	803.889	0	0		3.29555	877.715	0.375469	266.92		0	812.092	0	0		0	1.24476	0	0		0	1.40988	0	0
	0	1.33933	0	0		0	729.267	0	0		0	715.242	0	0		0	848.474	0	0		0.000261009	0.939632	0.0277778	3.22096e-05		0	805.679	0	0		0	879.67	0	0		0	813.9	0	0		0	1.24753	0	0		0	1.41302	0	0
	0	1.3423	0	0		0	730.887	0	0		1.27777	716.832	0.178253	183.313		0	850.359	0	0		0	0.94172	0	0		0	807.469	0	0		0	881.625	0	0		0	815.709	0	0		0	1.25031	0	0		0.0168591	1.41616	1.19048	0.00319983
	0	1.34528	0	0		1.00206	732.508	0.136799	124.739		0	718.421	0	0		0	852.245	0	0		0	0.943808	0	0		0	809.26	0	0		0	883.58	0	0		0	817.518	0	0		0	1.25308	0	0		0	1.4193	0	0
	0	1.34825	0	0		0	734.128	0	0		0	720.011	0	0		0	854.13	0	0		0	0.945896	0	0		0	811.05	0	0		0	885.534	0	0		0	819.326	0	0		0	1.25585	0	0		0	1.42244	0	0
	0	1.35123	0	0		0	735.749	0	0		0	721.6	0	0		0	856.016	0	0		0	0.947984	0	0		0	812.841	0	0		1.11075	887.489	0.125156	95.616		0	821.135	0	0		0	1.25862	0	0		0	1.42558	0	0
	0	1.35421	0	0		0	737.37	0	0		0	723.189	0	0		0	857.901	0	0		0	0.950072	0	0		0	814.631	0	0		0	889.444	0	0		0	822.943	0	0		0	1.2614	0	0		0	1.42872	0	0
	0	1.35718	0	0		0	738.99	0	0		0	724.779	0	0		0	859.787	0	0		0	0.95216	0	0		0	816.421	0	0		0	891.399	0	0		0	824.752	0	0		0	1.26417	0	0		0	1.43186	0	0
	0	1.36016	0	0		1.01315	740.611	0.136799	131.523		0	726.368	0	0		0	861.672	0	0		0	0.954249	0	0		0	818.212	0	0		0	893.354	0	0		0	826.561	0	0		0	1.26694	0	0		0	1.435	0	0
	0	1.36314	0	0		0	742.231	0	0		0	727.958	0	0		0	863.558	0	0		0.000265649	0.956337	0.0277778	3.54472e-05		0	820.002	0	0		3.36161	895.308	0.375469	303.307		0	828.37	0	0		0	1.26971	0	0		0	1.43814	0	0
	0	1.36611	0	0		0	743.852	0	0		0	729.547	0	0		0	865.443	0	0		0	0.958425	0	0		0	821.793	0	0		0	897.263	0	0		1.12796	830.178	0.13587	161.533		0.00848323	1.27249	0.666667	0.00118629		0	1.44128	0	0
	0	1.36909	0	0		0	745.473	0	0		0	731.137	0	0		0.657067	867.329	0.0757576	150.992		0	0.960513	0	0		0	823.583	0	0		0	899.218	0	0		0	831.987	0	0		0	1.27526	0	0		0	1.44442	0	0
	0	1.37207	0	0		0	747.093	0	0		2.61221	732.726	0.356506	403.869		0	869.214	0	0		0.000267389	0.962601	0.0277778	3.67013e-05		0	825.373	0	0		0	901.173	0	0		0	833.795	0	0		0	1.27803	0	0		0	1.44756	0	0
	0	1.37504	0	0		0	748.714	0	0		0	734.315	0	0		0	871.1	0	0		0	0.964689	0	0		0	827.164	0	0		0	903.128	0	0		0	835.604	0	0		0	1.2808	0	0		0	1.4507	0	0
	0	1.37802	0	0		0	750.334	0	0		0	735.905	0	0		0	872.985	0	0		0	0.966777	0	0		0	828.954	0	0		0	905.083	0	0		0	837.413	0	0		0	1.28357	0	0		0	1.45384	0	0
	0	1.38099	0	0		0	751.955	0	0		0	737.494	0	0		0	874.871	0	0		0	0.968865	0	0		0	830.745	0	0		0	907.037	0	0		0	839.221	0	0		0.00428782	1.28635	0.333333	0.000632767		0	1.45698	0	0
	0	1.38397	0	0		0	753.576	0	0		0	739.084	0	0		0	876.756	0	0		0	0.970953	0	0		0	832.535	0	0		0	908.992	0	0		0	841.03	0	0		0	1.28912	0	0		0.0173824	1.46012	1.19048	0.00376548
	0	1.38695	0	0		0	755.196	0	0		0	740.673	0	0		0	878.642	0	0		0	0.973041	0	0		0	834.325	0	0		0	910.947	0	0		0	842.839	0	0		0	1.29189	0	0		0	1.46326	0	0
	0	1.38992	0	0		0	756.817	0	0		0	742.263	0	0		0	880.527	0	0		0	0.975129	0	0		0	836.116	0	0		0	912.902	0	0		0	844.648	0	0		0	1.29466	0	0		0	1.4664	0	0
	0	1.3929	0	0		0	758.437	0	0		0	743.852	0	0		0	882.413	0	0		0	0.977217	0	0		0	837.906	0	0		2.29	914.857	0.250313	230.976		0	846.456	0	0		0	1.29744	0	0		0	1.46955	0	0
	0	1.39588	0	0		0	760.058	0	0		0	745.441	0	0		0	884.298	0	0		0.000272029	0.979305	0.0277778	4.01521e-05		0	839.697	0	0		0	916.812	0	0		0	848.265	0	0		0.00866805	1.30021	0.666667	0.00134734		0	1.47269	0	0
	0	1.39885	0	0		0	761.679	0	0		0	747.031	0	0		0	886.184	0	0		0	0.981393	0	0		0	841.487	0	0		0	918.766	0	0		1.15499	850.073	0.13587	180.712		0	1.30298	0	0		0.0175693	1.47582	1.19048	0.00397866
	0	1.40183	0	0		0	763.299	0	0		0	748.62	0	0		0	888.069	0	0		0	0.983482	0	0		0	843.277	0	0		0	920.721	0	0		0	851.882	0	0		0	1.30575	0	0		0	1.47897	0	0
	0	1.40481	0	0		0	764.92	0	0		0	750.21	0	0		0	889.955	0	0		0	0.98557	0	0		0	845.068	0	0		0	922.676	0	0		0	853.691	0	0		0	1.30852	0	0		0	1.48211	0	0
	0	1.40778	0	0		0	766.54	0	0		0	751.799	0	0		0	891.84	0	0		0.000274349	0.987658	0.0277778	4.19357e-05		0	846.858	0	0		0	924.631	0	0		0	855.5	0	0		0	1.3113	0	0		0	1.48524	0	0
	0.00571157	1.41076	0.404858	0.00186197		0	768.161	0	0		0	753.389	0	0		0	893.726	0	0		0	0.989746	0	0		0	848.649	0	0		0	926.586	0	0		0	857.308	0	0		0	1.31407	0	0		0	1.48839	0	0
	0	1.41373	0	0		0	769.782	0	0		0	754.978	0	0		0	895.611	0	0		0	0.991834	0	0		0	850.439	0	0		0	928.54	0	0		0	859.117	0	0		0	1.31684	0	0		0	1.49152	0	0
	0	1.41671	0	0		0	771.402	0	0		0	756.567	0	0		0	897.497	0	0		0	0.993922	0	0		0	852.229	0	0		0	930.495	0	0		0	860.926	0	0		0	1.31961	0	0		0	1.49466	0	0
	0	1.41969	0	0		0	773.023	0	0		0	758.157	0	0		0.68135	899.382	0.0757576	173.453		0.000553339	0.99601	0.0555556	8.7516e-05		0	854.02	0	0		0	932.45	0	0		0	862.734	0	0		0	1.32239	0	0		0	1.49781	0	0
	0	1.42266	0	0		0	774.643	0	0		0	759.746	0	0		0	901.268	0	0		0	0.998098	0	0		0	855.81	0	0		0	934.405	0	0		0	864.543	0	0		0	1.32516	0	0		0	1.50094	0	0
	0	1.42564	0	0		0	776.264	0	0		0	761.336	0	0		0	903.153	0	0		0	1.00019	0	0		0	857.601	0	0		0	936.36	0	0		0	866.352	0	0		0	1.32793	0	0		0	1.50408	0	0
	0	1.42861	0	0		0	777.885	0	0		0	762.925	0	0		0	905.039	0	0		0.000556819	1.00227	0.0555556	9.03002e-05		0	859.391	0	0		0	938.315	0	0		0	868.16	0	0		0.013307	1.3307	1	0.00230449		0	1.50723	0	0
	0	1.43159	0	0		0	779.505	0	0		0	764.515	0	0		0	906.924	0	0		0	1.00436	0	0		0	861.181	0	0		0	940.269	0	0		0	869.969	0	0		0	1.33348	0	0		0	1.51036	0	0
	0	1.43457	0	0		0	781.126	0	0		0	766.104	0	0		0	908.81	0	0		0	1.00645	0	0		0	862.972	0	0		0	942.224	0	0		0	871.778	0	0		0	1.33625	0	0		0	1.51351	0	0
	0	1.43754	0	0		0	782.746	0	0		0	767.693	0	0		0	910.695	0	0		0	1.00854	0	0		0	864.762	0	0		0	944.179	0	0		0	873.586	0	0		0	1.33902	0	0		0	1.51665	0	0
	0	1.44052	0	0		0	784.367	0	0		0	769.283	0	0		0	912.581	0	0		0	1.01063	0	0		0	866.553	0	0		0	946.134	0	0		0	875.395	0	0		0	1.34179	0	0		0	1.51978	0	0
	0	1.4435	0	0		0	785.987	0	0		0	770.872	0	0		0	914.466	0	0		0	1.01272	0	0		0	868.343	0	0		0	948.089	0	0		0	877.203	0	0		0	1.34457	0	0		0	1.52293	0	0
	0	1.44647	0	0		0	787.608	0	0		2.75387	772.462	0.356506	504.858		0	916.352	0	0		0	1.0148	0	0		0	870.133	0	0		0	950.043	0	0		0	879.012	0	0		0	1.34734	0	0		0	1.52607	0	0
	0	1.44945	0	0		0	789.229	0	0		0	774.051	0	0		0	918.237	0	0		0	1.01689	0	0		0	871.924	0	0		1.19149	951.998	0.125156	145.456		0	880.821	0	0		0	1.35011	0	0		0	1.52921	0	0
	0	1.45243	0	0		0	790.849	0	0		0	775.641	0	0		0	920.123	0	0		0	1.01898	0	0		0	873.714	0	0		0	953.953	0	0		0	882.63	0	0		0	1.35288	0	0		0	1.53235	0	0
	0	1.4554	0	0		0	792.47	0	0		0	777.23	0	0		0	922.008	0	0		0	1.02107	0	0		0	875.505	0	0		0	955.908	0	0		0	884.438	0	0		0	1.35565	0	0		0	1.53549	0	0
	0	1.45838	0	0		0	794.09	0	0		0	778.819	0	0		0	923.894	0	0		0	1.02316	0	0		0	877.295	0	0		0	957.863	0	0		0	886.247	0	0		0	1.35843	0	0		0	1.53863	0	0
	0	1.46135	0	0		0	795.711	0	0		0	780.409	0	0		0	925.779	0	0		0	1.02524	0	0		0	879.085	0	0		0	959.818	0	0		0	888.056	0	0		0	1.3612	0	0		0	1.54177	0	0
	0	1.46433	0	0		0	797.332	0	0		0	781.998	0	0		0	927.665	0	0		0	1.02733	0	0		0	880.876	0	0		0	961.772	0	0		0	889.864	0	0		0	1.36397	0	0		0	1.54491	0	0
	0	1.46731	0	0		0	798.952	0	0		0	783.588	0	0		0	929.55	0	0		0	1.02942	0	0		0	882.666	0	0		0	963.727	0	0		0	891.673	0	0		0	1.36674	0	0		0	1.54805	0	0
	0	1.47028	0	0		0	800.573	0	0		0	785.177	0	0		0	931.436	0	0		0	1.03151	0	0		0	884.456	0	0		0	965.682	0	0		0	893.481	0	0		0	1.36952	0	0		0	1.55119	0	0
	0	1.47326	0	0		0	802.193	0	0		0	786.767	0	0		0	933.321	0	0		0	1.0336	0	0		0	886.247	0	0		0	967.637	0	0		0	895.29	0	0		0	1.37229	0	0		0	1.55433	0	0
	0	1.47623	0	0		0	803.814	0	0		0	788.356	0	0		0	935.207	0	0		0	1.03568	0	0		0	888.037	0	0		0	969.592	0	0		0	897.099	0	0		0	1.37506	0	0		0	1.55747	0	0
	0	1.47921	0	0		0	805.434	0	0		0	789.945	0	0		0	937.092	0	0		0	1.03777	0	0		0	889.828	0	0		0	971.547	0	0		0	898.908	0	0		0	1.37783	0	0		0	1.56061	0	0
	0	1.48219	0	0		0	807.055	0	0		0	791.535	0	0		0	938.978	0	0		0	1.03986	0	0		0	891.618	0	0		0	973.501	0	0		0	900.716	0	0		0	1.38061	0	0		0	1.56375	0	0
	0	1.48516	0	0		0	808.676	0	0		0	793.124	0	0		0	940.863	0	0		0	1.04195	0	0		0	893.409	0	0		0	975.456	0	0		0	902.525	0	0		0	1.38338	0	0		0	1.56689	0	0
	0	1.48814	0	0		0	810.296	0	0		0	794.714	0	0		0	942.749	0	0		0	1.04404	0	0		0	895.199	0	0		0	977.411	0	0		0	904.334	0	0		0	1.38615	0	0		0	1.57003	0	0
	0	1.49112	0	0		0	811.917	0	0		0	796.303	0	0		0	944.634	0	0		0	1.04612	0	0		0	896.989	0	0		0	979.366	0	0		0	906.142	0	0		0.00462974	1.38892	0.333333	0.000965782		0	1.57317	0	0
	0	1.49409	0	0		0	813.538	0	0		0	797.893	0	0		0	946.52	0	0		0	1.04821	0	0		0	898.78	0	0		0	981.321	0	0		0	907.951	0	0		0	1.39169	0	0		0	1.57631	0	0
	0	1.49707	0	0		0	815.158	0	0		0	799.482	0	0		0	948.405	0	0		0	1.0503	0	0		0	900.57	0	0		0	983.275	0	0		0	909.76	0	0		0	1.39447	0	0		0	1.57945	0	0
	0	1.50005	0	0		0	816.779	0	0		0	801.071	0	0		0	950.291	0	0		0	1.05239	0	0		0	902.36	0	0		0	985.23	0	0		0	911.568	0	0		0	1.39724	0	0		0	1.58259	0	0
	0	1.50302	0	0		0	818.399	0	0		0	802.661	0	0		0	952.176	0	0		0	1.05448	0	0		0	904.151	0	0		0	987.185	0	0		0	913.377	0	0		0	1.40001	0	0		0	1.58573	0	0
	0	1.506	0	0		0	820.02	0	0		0	804.25	0	0		0	954.062	0	0		0	1.05656	0	0		0	905.941	0	0		1.23797	989.14	0.125156	178.877		0	915.186	0	0		0	1.40278	0	0		0	1.58887	0	0
	0	1.50897	0	0		0	821.64	0	0		0	805.84	0	0		0	955.947	0	0		0	1.05865	0	0		0	907.732	0	0		0	991.095	0	0		0	916.994	0	0		0	1.40556	0	0		0	1.59201	0	0
	0	1.51195	0	0		0	823.261	0	0		0	807.429	0	0		0	957.833	0	0		0	1.06074	0	0		0	909.522	0	0		0	993.05	0	0		0	918.803	0	0		0	1.40833	0	0		0	1.59515	0	0
	0	1.51493	0	0		0	824.882	0	0		0	809.019	0	0		0	959.718	0	0		0	1.06283	0	0		0	911.312	0	0		0	995.004	0	0		0	920.612	0	0		0	1.4111	0	0		0	1.59829	0	0
	0	1.5179	0	0		0	826.502	0	0		0	810.608	0	0		0	961.604	0	0		0	1.06492	0	0		0	913.103	0	0		0	996.959	0	0		0	922.42	0	0		0	1.41387	0	0		0	1.60143	0	0
	0.0030787	1.52088	0.202429	0.00125789		1.13286	828.123	0.136799	216.24		1.44777	812.197	0.178253	308.552		0.729916	963.489	0.0757576	223.043		0.00029639	1.067	0.0277778	6.08122e-05		1.9889	914.893	0.217391	453.384		1.2502	998.914	0.125156	188.246		1.25575	924.229	0.13587	261.673		0.00472215	1.41664	0.333333	0.00106782		0.019102	1.60457	1.19048	0.00594803
	0			0		0			0		0			0		0			0		0			0		0			0		0			0		0			0		0			0		0			0
	0			0		0			0		0			0		0			0		0			0		0			0		0			0		0			0		0			0		0			0
	0			0		0			0		0			0		0			0		0			0		0			0		0			0		0			0		0			0		0			0
	0			0		0			0		0			0		0			0		0			0		0			0		0			0		0			0		0			0		0			0
	0			0		0			0		0			0		0			0		0			0		0			0		0			0		0			0		0			0		0			0
	0			0		0			0		0			0		0			0		0			0		0			0		0			0		0			0		0			0		0			0
	0			0		0			0		0			0		0			0		0			0		0			0		0			0		0			0		0			0		0			0
	0			0		0			0		0			0		0			0		0			0		0			0		0			0		0			0		0			0		0			0
	0			0		0			0		0			0		0			0		0			0		0			0		0			0		0			0		0			0		0			0
	0			0		0			0		0			0		0			0		0			0		0			0		0			0		0			0		0			0		0			0
	0			0		0			0		0			0		0			0		0			0		0			0		0			0		0			0		0			0		0			0
	0			0		0			0		0			0		0			0		0			0		0			0		0			0		0			0		0			0		0			0
	0			0		0			0		0			0		0			0		0			0		0			0		0			0		0			0		0			0		0			0
	0			0		0			0		0			0		0			0		0			0		0			0		0			0		0			0		0			0		0			0
	0			0		0			0		0			0		0			0		0			0		0			0		0			0		0			0		0			0		0			0
	0			0		0			0		0			0		0			0		0			0		0			0		0			0		0			0		0			0		0			0
	0			0		0			0		0			0		0			0		0			0		0			0		0			0		0			0		0			0		0			0
	0			0		0			0		0			0		0			0		0			0		0			0		0			0		0			0		0			0		0			0
	0			0		0			0		0			0		0			0		0			0		0			0		0			0		0			0		0			0		0			0
	0			0		0			0		0			0		0			0		0			0		0			0		0			0		0			0		0			0		0			0
	0			0		0			0		0			0		0			0		0			0		0			0		0			0		0			0		0			0		0			0
	0			0		0			0		0			0		0			0		0			0		0			0		0			0		0			0		0			0		0			0
	0			0		0			0		0			0		0			0		0			0		0			0		0			0		0			0		0			0		0			0
	0			0		0			0		0			0		0			0		0			0		0			0		0			0		0			0		0			0		0			0
	0			0		0			0		0			0		0			0		0			0		0			0		0			0		0			0		0			0		0			0
	0			0		0			0		0			0		0			0		0			0		0			0		0			0		0			0		0			0		0			0
	0			0		0			0		0			0		0			0		0			0		0			0		0			0		0			0		0			0		0			0
	0			0		0			0		0			0		0			0		0			0		0			0		0			0		0			0		0			0		0			0
	0			0		0			0		0			0		0			0		0			0		0			0		0			0		0			0		0			0		0			0
	0			0		0			0		0			0		0			0		0			0		0			0		0			0		0			0		0			0		0			0
	0			0		0			0		0			0		0			0		0			0		0			0		0			0		0			0		0			0		0			0
	0			0		0			0		0			0		0			0		0			0		0			0		0			0		0			0		0			0		0			0
	0			0		0			0		0			0		0			0		0			0		0			0		0			0		0			0		0			0		0			0
	0			0		0			0		0			0		0			0		0			0		0			0		0			0		0			0		0			0		0			0
	0			0		0			0		0			0		0			0		0			0		0			0		0			0		0			0		0			0		0			0
	0			0		0			0		0			0		0			0		0			0		0			0		0			0		0			0		0			0		0			0
	0			0		0			0		0			0		0			0		0			0		0			0		0			0		0			0		0			0		0			0
	0			0		0			0		0			0		0			0		0			0		0			0		0			0		0			0		0			0		0			0
	0			0		0			0		0			0		0			0		0			0		0			0		0			0		0			0		0			0		0			0
	0			0		0			0		0			0		0			0		0			0		0			0		0			0		0			0		0			0		0			0
	0			0		0			0		0			0		0			0		0			0		0			0		0			0		0			0		0			0		0			0
	0			0		0			0		0			0		0			0		0			0		0			0		0			0		0			0		0			0		0			0
	0			0		0			0		0			0		0			0		0			0		0			0		0			0		0			0		0			0		0			0
	0			0		0			0		0			0		0			0		0			0		0			0		0			0		0			0		0			0		0			0
	0			0		0			0		0			0		0			0		0			0		0			0		0			0		0			0		0			0		0			0
	0			0		0			0		0			0		0			0		0			0		0			0		0			0		0			0		0			0		0			0
	0			0		0			0		0			0		0			0		0			0		0			0		0			0		0			0		0			0		0			0
	0			0		0			0		0			0		0			0		0			0		0			0		0			0		0			0		0			0		0			0
	0			0		0			0		0			0		0			0		0			0		0			0		0			0		0			0		0			0		0			0
	0			0		0			0		0			0		0			0		0			0		0			0		0			0		0			0		0			0		0			0
	0			0		0			0		0			0		0			0		0			0		0			0		0			0		0			0		0			0		0			0
	0			0		0			0		0			0		0			0		0			0		0			0		0			0		0			0		0			0		0			0
	0			0		0			0		0			0		0			0		0			0		0			0		0			0		0			0		0			0		0			0
	0			0		0			0		0			0		0			0		0			0		0			0		0			0		0			0		0			0		0			0
	0			0		0			0		0			0		0			0		0			0		0			0		0			0		0			0		0			0		0			0
	0			0		0			0		0			0		0			0		0			0		0			0		0			0		0			0		0			0		0			0
	0			0		0			0		0			0		0			0		0			0		0			0		0			0		0			0		0			0		0			0
	0			0		0			0		0			0		0			0		0			0		0			0		0			0		0			0		0			0		0			0
	0			0		0			0		0			0		0			0		0			0		0			0		0			0		0			0		0			0		0			0
	0			0		0			0		0			0		0			0		0			0		0			0		0			0		0			0		0			0		0			0
	0			0		0			0		0			0		0			0		0			0		0			0		0			0		0			0		0			0		0			0
	0			0		0			0		0			0		0			0		0			0		0			0		0			0		0			0		0			0		0			0
	0			0		0			0		0			0		0			0		0			0		0			0		0			0		0			0		0			0		0			0
	0			0		0			0		0			0		0			0		0			0		0			0		0			0		0			0		0			0		0			0
	0			0		0			0		0			0		0			0		0			0		0			0		0			0		0			0		0			0		0			0
	0			0		0			0		0			0		0			0		0			0		0			0		0			0		0			0		0			0		0			0
	0			0		0			0		0			0		0			0		0			0		0			0		0			0		0			0		0			0		0			0
	0			0		0			0		0			0		0			0		0			0		0			0		0			0		0			0		0			0		0			0
	0			0		0			0		0			0		0			0		0			0		0			0		0			0		0			0		0			0		0			0
	0			0		0			0		0			0		0			0		0			0		0			0		0			0		0			0		0			0		0			0
	0			0		0			0		0			0		0			0		0			0		0			0		0			0		0			0		0			0		0			0
	0			0		0			0		0			0		0			0		0			0		0			0		0			0		0			0		0			0		0			0
	0			0		0			0		0			0		0			0		0			0		0			0		0			0		0			0		0			0		0			0
	0			0		0			0		0			0		0			0		0			0		0			0		0			0		0			0		0			0		0			0
	0			0		0			0		0			0		0			0		0			0		0			0		0			0		0			0		0			0		0			0
	0			0		0			0		0			0		0			0		0			0		0			0		0			0		0			0		0			0		0			0
	0			0		0			0		0			0		0			0		0			0		0			0		0			0		0			0		0			0		0			0
	0			0		0			0		0			0		0			0		0			0		0			0		0			0		0			0		0			0		0			0
	0			0		0			0		0			0		0			0		0			0		0			0		0			0		0			0		0			0		0			0
	0			0		0			0		0			0		0			0		0			0		0			0		0			0		0			0		0			0		0			0
	0			0		0			0		0			0		0			0		0			0		0			0		0			0		0			0		0			0		0			0
	0			0		0			0		0			0		0			0		0			0		0			0		0			0		0			0		0			0		0			0
	0			0		0			0		0			0		0			0		0			0		0			0		0			0		0			0		0			0		0			0
	0			0		0			0		0			0		0			0		0			0		0			0		0			0		0			0		0			0		0			0
	0			0		0			0		0			0		0			0		0			0		0			0		0			0		0			0		0			0		0			0
	0			0		0			0		0			0		0			0		0			0		0			0		0			0		0			0		0			0		0			0
	0			0		0			0		0			0		0			0		0			0		0			0		0			0		0			0		0			0		0			0
	0			0		0			0		0			0		0			0		0			0		0			0		0			0		0			0		0			0		0			0
	0			0		0			0		0			0		0			0		0			0		0			0		0			0		0			0		0			0		0			0
	0			0		0			0		0			0		0			0		0			0		0			0		0			0		0			0		0			0		0			0
	0			0		0			0		0			0		0			0		0			0		0			0		0			0		0			0		0			0		0			0
	0			0		0			0		0			0		0			0		0			0		0			0		0			0		0			0		0			0		0			0
	0			0		0			0		0			0		0			0		0			0		0			0		0			0		0			0		0			0		0			0
	0			0		0			0		0			0		0			0		0			0		0			0		0			0		0			0		0			0		0			0
	0			0		0			0		0			0		0			0		0			0		0			0		0			0		0			0		0			0		0			0
	0			0		0			0		0			0		0			0		0			0		0			0		0			0		0			0		0			0		0			0
	0			0		0			0		0			0		0			0		0			0		0			0		0			0		0			0		0			0		0			0
	0			0		0			0		0			0		0			0		0			0		0			0		0			0		0			0		0			0		0			0
	0			0		0			0		0			0		0			0		0			0		0			0		0			0		0			0		0			0		0			0
	0			0		0			0		0			0		0			0		0			0		0			0		0			0		0			0		0			0		0			0
	0			0		0			0		0			0		0			0		0			0		0			0		0			0		0			0		0			0		0			0
	0			0		0			0		0			0		0			0		0			0		0			0		0			0		0			0		0			0		0			0
	0			0		0			0		0			0		0			0		0			0		0			0		0			0		0			0		0			0		0			0
	0			0		0			0		0			0		0			0		0			0		0			0		0			0		0			0		0			0		0			0
	0			0		0			0		0			0		0			0		0			0		0			0		0			0		0			0		0			0		0			0
	0			0		0			0		0			0		0			0		0			0		0			0		0			0		0			0		0			0		0			0
	0			0		0			0		0			0		0			0		0			0		0			0		0			0		0			0		0			0		0			0
	0			0		0			0		0			0		0			0		0			0		0			0		0			0		0			0		0			0		0			0
	0			0		0			0		0			0		0			0		0			0		0			0		0			0		0			0		0			0		0			0
	0			0		0			0		0			0		0			0		0			0		0			0		0			0		0			0		0			0		0			0
	0			0		0			0		0			0		0			0		0			0		0			0		0			0		0			0		0			0		0			0
	0			0		0			0		0			0		0			0		0			0		0			0		0			0		0			0		0			0		0			0
	0			0		0			0		0			0		0			0		0			0		0			0		0			0		0			0		0			0		0			0
	0			0		0			0		0			0		0			0		0			0		0			0		0			0		0			0		0			0		0			0
	0			0		0			0		0			0		0			0		0			0		0			0		0			0		0			0		0			0		0			0
	0			0		0			0		0			0		0			0		0			0		0			0		0			0		0			0		0			0		0			0
	0			0		0			0		0			0		0			0		0			0		0			0		0			0		0			0		0			0		0			0
	0			0		0			0		0			0		0			0		0			0		0			0		0			0		0			0		0			0		0			0
	0			0		0			0		0			0		0			0		0			0		0			0		0			0		0			0		0			0		0			0
	0			0		0			0		0			0		0			0		0			0		0			0		0			0		0			0		0			0		0			0
	0			0		0			0		0			0		0			0		0			0		0			0		0			0		0			0		0			0		0			0
	0			0		0			0		0			0		0			0		0			0		0			0		0			0		0			0		0			0		0			0
	0			0		0			0		0			0		0			0		0			0		0			0		0			0		0			0		0			0		0			0
	0			0		0			0		0			0		0			0		0			0		0			0		0			0		0			0		0			0		0			0
	0			0		0			0		0			0		0			0		0			0		0			0		0			0		0			0		0			0		0			0
	0			0		0			0		0			0		0			0		0			0		0			0		0			0		0			0		0			0		0			0
	0			0		0			0		0			0		0			0		0			0		0			0		0			0		0			0		0			0		0			0
	0			0		0			0		0			0		0			0		0			0		0			0		0			0		0			0		0			0		0			0
	0			0		0			0		0			0		0			0		0			0		0			0		0			0		0			0		0			0		0			0
	0			0		0			0		0			0		0			0		0			0		0			0		0			0		0			0		0			0		0			0
	0			0		0			0		0			0		0			0		0			0		0			0		0			0		0			0		0			0		0			0
	0			0		0			0		0			0		0			0		0			0		0			0		0			0		0			0		0			0		0			0
	0			0		0			0		0			0		0			0		0			0		0			0		0			0		0			0		0			0		0			0
	0			0		0			0		0			0		0			0		0			0		0			0		0			0		0			0		0			0		0			0
	0			0		0			0		0			0		0			0		0			0		0			0		0			0		0			0		0			0		0			0
	0			0		0			0		0			0		0			0		0			0		0			0		0			0		0			0		0			0		0			0
	0			0		0			0		0			0		0			0		0			0		0			0		0			0		0			0		0			0		0			0
	0			0		0			0		0			0		0			0		0			0		0			0		0			0		0			0		0			0		0			0
	0			0		0			0		0			0		0			0		0			0		0			0		0			0		0			0		0			0		0			0
	0			0		0			0		0			0		0			0		0			0		0			0		0			0		0			0		0			0		0			0
	0			0		0			0		0			0		0			0		0			0		0			0		0			0		0			0		0			0		0			0
	0			0		0			0		0			0		0			0		0			0		0			0		0			0		0			0		0			0		0			0
	0			0		0			0		0			0		0			0		0			0		0			0		0			0		0			0		0			0		0			0
	0			0		0			0		0			0		0			0		0			0		0			0		0			0		0			0		0			0		0			0
	0			0		0			0		0			0		0			0		0			0		0			0		0			0		0			0		0			0		0			0
	0			0		0			0		0			0		0			0		0			0		0			0		0			0		0			0		0			0		0			0
	0			0		0			0		0			0		0			0		0			0		0			0		0			0		0			0		0			0		0			0
	0			0		0			0		0			0		0			0		0			0		0			0		0			0		0			0		0			0		0			0
	0			0		0			0		0			0		0			0		0			0		0			0		0			0		0			0		0			0		0			0
	0			0		0			0		0			0		0			0		0			0		0			0		0			0		0			0		0			0		0			0
	0			0		0			0		0			0		0			0		0			0		0			0		0			0		0			0		0			0		0			0
	0			0		0			0		0			0		0			0		0			0		0			0		0			0		0			0		0			0		0			0
	0			0		0			0		0			0		0			0		0			0		0			0		0			0		0			0		0			0		0			0
	0			0		0			0		0			0		0			0		0			0		0			0		0			0		0			0		0			0		0			0
	0			0		0			0		0			0		0			0		0			0		0			0		0			0		0			0		0			0		0			0
	0			0		0			0		0			0		0			0		0			0		0			0		0			0		0			0		0			0		0			0
	0			0		0			0		0			0		0			0		0			0		0			0		0			0		0			0		0			0		0			0
	0			0		0			0		0			0		0			0		0			0		0			0		0			0		0			0		0			0		0			0
	0			0		0			0		0			0		0			0		0			0		0			0		0			0		0			0		0			0		0			0
	0			0		0			0		0			0		0			0		0			0		0			0		0			0		0			0		0			0		0			0
	0			0		0			0		0			0		0			0		0			0		0			0		0			0		0			0		0			0		0			0
	0			0		0			0		0			0		0			0		0			0		0			0		0			0		0			0		0			0		0			0
	0			0		0			0		0			0		0			0		0			0		0			0		0			0		0			0		0			0		0			0
	0			0		0			0		0			0		0			0		0			0		0			0		0			0		0			0		0			0		0			0
	0			0		0			0		0			0		0			0		0			0		0			0		0			0		0			0		0			0		0			0
	0			0		0			0		0			0		0			0		0			0		0			0		0			0		0			0		0			0		0			0
	0			0		0			0		0			0		0			0		0			0		0			0		0			0		0			0		0			0		0			0
	0			0		0			0		0			0		0			0		0			0		0			0		0			0		0			0		0			0		0			0
	0			0		0			0		0			0		0			0		0			0		0			0		0			0		0			0		0			0		0			0
	0			0		0			0		0			0		0			0		0			0		0			0		0			0		0			0		0			0		0			0
	0			0		0			0		0			0		0			0		0			0		0			0		0			0		0			0		0			0		0			0
	0			0		0			0		0			0		0			0		0			0		0			0		0			0		0			0		0			0		0			0
	0			0		0			0		0			0		0			0		0			0		0			0		0			0		0			0		0			0		0			0
	0			0		0			0		0			0		0			0		0			0		0			0		0			0		0			0		0			0		0			0
	0			0		0			0		0			0		0			0		0			0		0			0		0			0		0			0		0			0		0			0
	0			0		0			0		0			0		0			0		0			0		0			0		0			0		0			0		0			0		0			0
	0			0		0			0		0			0		0			0		0			0		0			0		0			0		0			0		0			0		0			0
	0			0		0			0		0			0		0			0		0			0		0			0		0			0		0			0		0			0		0			0
	0			0		0			0		0			0		0			0		0			0		0			0		0			0		0			0		0			0		0			0
	0			0		0			0		0			0		0			0		0			0		0			0		0			0		0			0		0			0		0			0
	0			0		0			0		0			0		0			0		0			0		0			0		0			0		0			0		0			0		0			0
	0			0		0			0		0			0		0			0		0			0		0			0		0			0		0			0		0			0		0			0
	0			0		0			0		0			0		0			0		0			0		0			0		0			0		0			0		0			0		0			0
	0			0		0			0		0			0		0			0		0			0		0			0		0			0		0			0		0			0		0			0
	0			0		0			0		0			0		0			0		0			0		0			0		0			0		0			0		0			0		0			0
	0			0		0			0		0			0		0			0		0			0		0			0		0			0		0			0		0			0		0			0
	0			0		0			0		0			0		0			0		0			0		0			0		0			0		0			0		0			0		0			0
	0			0		0			0		0			0		0			0		0			0		0			0		0			0		0			0		0			0		0			0
	0			0		0			0		0			0		0			0		0			0		0			0		0			0		0			0		0			0		0			0
	0			0		0			0		0			0		0			0		0			0		0			0		0			0		0			0		0			0		0			0
	0			0		0			0		0			0		0			0		0			0		0			0		0			0		0			0		0			0		0			0
	0			0		0			0		0			0		0			0		0			0		0			0		0			0		0			0		0			0		0			0
	0			0		0			0		0			0		0			0		0			0		0			0		0			0		0			0		0			0		0			0
	0			0		0			0		0			0		0			0		0			0		0			0		0			0		0			0		0			0		0			0
	0			0		0			0		0			0		0			0		0			0		0			0		0			0		0			0		0			0		0			0
	0			0		0			0		0			0		0			0		0			0		0			0		0			0		0			0		0			0		0			0
	0			0		0			0		0			0		0			0		0			0		0			0		0			0		0			0		0			0		0			0
	0			0		0			0		0			0		0			0		0			0		0			0		0			0		0			0		0			0		0			0
	0			0		0			0		0			0		0			0		0			0		0			0		0			0		0			0		0			0		0			0
	0			0		0			0		0			0		0			0		0			0		0			0		0			0		0			0		0			0		0			0
	0			0		0			0		0			0		0			0		0			0		0			0		0			0		0			0		0			0		0			0
	0			0		0			0		0			0		0			0		0			0		0			0		0			0		0			0		0			0		0			0
	0			0		0			0		0			0		0			0		0			0		0			0		0			0		0			0		0			0		0			0
	0			0		0			0		0			0		0			0		0			0		0			0		0			0		0			0		0			0		0			0
	0			0		0			0		0			0		0			0		0			0		0			0		0			0		0			0		0			0		0			0
	0			0		0			0		0			0		0			0		0			0		0			0		0			0		0			0		0			0		0			0
	0			0		0			0		0			0		0			0		0			0		0			0		0			0		0			0		0			0		0			0
	0			0		0			0		0			0		0			0		0			0		0			0		0			0		0			0		0			0		0			0
	0			0		0			0		0			0		0			0		0			0		0			0		0			0		0			0		0			0		0			0
	0			0		0			0		0			0		0			0		0			0		0			0		0			0		0			0		0			0		0			0
	0			0		0			0		0			0		0			0		0			0		0			0		0			0		0			0		0			0		0			0
	0			0		0			0		0			0		0			0		0			0		0			0		0			0		0			0		0			0		0			0
	0			0		0			0		0			0		0			0		0			0		0			0		0			0		0			0		0			0		0			0
	0			0		0			0		0			0		0			0		0			0		0			0		0			0		0			0		0			0		0			0
	0			0		0			0		0			0		0			0		0			0		0			0		0			0		0			0		0			0		0			0
	0			0		0			0		0			0		0			0		0			0		0			0		0			0		0			0		0			0		0			0
	0			0		0			0		0			0		0			0		0			0		0			0		0			0		0			0		0			0		0			0
	0			0		0			0		0			0		0			0		0			0		0			0		0			0		0			0		0			0		0			0
	0			0		0			0		0			0		0			0		0			0		0			0		0			0		0			0		0			0		0			0
	0			0		0			0		0			0		0			0		0			0		0			0		0			0		0			0		0			0		0			0
	0			0		0			0		0			0		0			0		0			0		0			0		0			0		0			0		0			0		0			0
	0			0		0			0		0			0		0			0		0			0		0			0		0			0		0			0		0			0		0			0
	0			0		0			0		0			0		0			0		0			0		0			0		0			0		0			0		0			0		0			0
	0			0		0			0		0			0		0			0		0			0		0			0		0			0		0			0		0			0		0			0
	0			0		0			0		0			0		0			0		0			0		0			0		0			0		0			0		0			0		0			0
	0			0		0			0		0			0		0			0		0			0		0			0		0			0		0			0		0			0		0			0
	0			0		0			0		0			0		0			0		0			0		0			0		0			0		0			0		0			0		0			0
	0			0		0			0		0			0		0			0		0			0		0			0		0			0		0			0		0			0		0			0
	0			0		0			0		0			0		0			0		0			0		0			0		0			0		0			0		0			0		0			0
	0			0		0			0		0			0		0			0		0			0		0			0		0			0		0			0		0			0		0			0
	0			0		0			0		0			0		0			0		0			0		0			0		0			0		0			0		0			0		0			0
	0			0		0			0		0			0		0			0		0			0		0			0		0			0		0			0		0			0		0			0
	0			0		0			0		0			0		0			0		0			0		0			0		0			0		0			0		0			0		0			0
	0			0		0			0		0			0		0			0		0			0		0			0		0			0		0			0		0			0		0			0
	0			0		0			0		0			0		0			0		0			0		0			0		0			0		0			0		0			0		0			0
	0			0		0			0		0			0		0			0		0			0		0			0		0			0		0			0		0			0		0			0
	0			0		0			0		0			0		0			0		0			0		0			0		0			0		0			0		0			0		0			0
	0			0		0			0		0			0		0			0		0			0		0			0		0			0		0			0		0			0		0			0
	0			0		0			0		0			0		0			0		0			0		0			0		0			0		0			0		0			0		0			0
	0			0		0			0		0			0		0			0		0			0		0			0		0			0		0			0		0			0		0			0
	0			0		0			0		0			0		0			0		0			0		0			0		0			0		0			0		0			0		0			0
	0			0		0			0		0			0		0			0		0			0		0			0		0			0		0			0		0			0		0			0
	0			0		0			0		0			0		0			0		0			0		0			0		0			0		0			0		0			0		0			0
	0			0		0			0		0			0		0			0		0			0		0			0		0			0		0			0		0			0		0			0
	0			0		0			0		0			0		0			0		0			0		0			0		0			0		0			0		0			0		0			0
	0			0		0			0		0			0		0			0		0			0		0			0		0			0		0			0		0			0		0			0
	0			0		0			0		0			0		0			0		0			0		0			0		0			0		0			0		0			0		0			0
	0			0		0			0		0			0		0			0		0			0		0			0		0			0		0			0		0			0		0			0
	0			0		0			0		0			0		0			0		0			0		0			0		0			0		0			0		0			0		0			0
	0			0		0			0		0			0		0			0		0			0		0			0		0			0		0			0		0			0		0			0
	0			0		0			0		0			0		0			0		0			0		0			0		0			0		0			0		0			0		0			0
	0			0		0			0		0			0		0			0		0			0		0			0		0			0		0			0		0			0		0			0
	0			0		0			0		0			0		0			0		0			0		0			0		0			0		0			0		0			0		0			0
	0			0		0			0		0			0		0			0		0			0		0			0		0			0		0			0		0			0		0			0
	0			0		0			0		0			0		0			0		0			0		0			0		0			0		0			0		0			0		0			0
	0			0		0			0		0			0		0			0		0			0		0			0		0			0		0			0		0			0		0			0
	0			0		0			0		0			0		0			0		0			0		0			0		0			0		0			0		0			0		0			0
	0			0		0			0		0			0		0			0		0			0		0			0		0			0		0			0		0			0		0			0
	0			0		0			0		0			0		0			0		0			0		0			0		0			0		0			0		0			0		0			0
	0			0		0			0		0			0		0			0		0			0		0			0		0			0		0			0		0			0		0			0
	0			0		0			0		0			0		0			0		0			0		0			0		0			0		0			0		0			0		0			0
	0			0		0			0		0			0		0			0		0			0		0			0		0			0		0			0		0			0		0			0
	0			0		0			0		0			0		0			0		0			0		0			0		0			0		0			0		0			0		0			0
	0			0		0			0		0			0		0			0		0			0		0			0		0			0		0			0		0			0		0			0
	0			0		0			0		0			0		0			0		0			0		0			0		0			0		0			0		0			0		0			0
	0			0		0			0		0			0		0			0		0			0		0			0		0			0		0			0		0			0		0			0
	0			0		0			0		0			0		0			0		0			0		0			0		0			0		0			0		0			0		0			0
	0			0		0			0		0			0		0			0		0			0		0			0		0			0		0			0		0			0		0			0
	0			0		0			0		0			0		0			0		0			0		0			0		0			0		0			0		0			0		0			0
	0			0		0			0		0			0		0			0		0			0		0			0		0			0		0			0		0			0		0			0
	0			0		0			0		0			0		0			0		0			0		0			0		0			0		0			0		0			0		0			0
	0			0		0			0		0			0		0			0		0			0		0			0		0			0		0			0		0			0		0			0
	0			0		0			0		0			0		0			0		0			0		0			0		0			0		0			0		0			0		0			0
	0			0		0			0		0			0		0			0		0			0		0			0		0			0		0			0		0			0		0			0
	0			0		0			0		0			0		0			0		0			0		0			0		0			0		0			0		0			0		0			0
	0			0		0			0		0			0		0			0		0			0		0			0		0			0		0			0		0			0		0			0
	0			0		0			0		0			0		0			0		0			0		0			0		0			0		0			0		0			0		0			0
	0			0		0			0		0			0		0			0		0			0		0			0		0			0		0			0		0			0		0			0
	0			0		0			0		0			0		0			0		0			0		0			0		0			0		0			0		0			0		0			0
	0			0		0			0		0			0		0			0		0			0		0			0		0			0		0			0		0			0		0			0
	0			0		0			0		0			0		0			0		0			0		0			0		0			0		0			0		0			0		0			0
	0			0		0			0		0			0		0			0		0			0		0			0		0			0		0			0		0			0		0			0
	0			0		0			0		0			0		0			0		0			0		0			0		0			0		0			0		0			0		0			0
	0			0		0			0		0			0		0			0		0			0		0			0		0			0		0			0		0			0		0			0
	0			0		0			0		0			0		0			0		0			0		0			0		0			0		0			0		0			0		0			0
	0			0		0			0		0			0		0			0		0			0		0			0		0			0		0			0		0			0		0			0
	0			0		0			0		0			0		0			0		0			0		0			0		0			0		0			0		0			0		0			0
	0			0		0			0		0			0		0			0		0			0		0			0		0			0		0			0		0			0		0			0
	0			0		0			0		0			0		0			0		0			0		0			0		0			0		0			0		0			0		0			0
	0			0		0			0		0			0		0			0		0			0		0			0		0			0		0			0		0			0		0			0
	0			0		0			0		0			0		0			0		0			0		0			0		0			0		0			0		0			0		0			0
	0			0		0			0		0			0		0			0		0			0		0			0		0			0		0			0		0			0		0			0
	0			0		0			0		0			0		0			0		0			0		0			0		0			0		0			0		0			0		0			0
	0			0		0			0		0			0		0			0		0			0		0			0		0			0		0			0		0			0		0			0
	0			0		0			0		0			0		0			0		0			0		0			0		0			0		0			0		0			0		0			0
	0			0		0			0		0			0		0			0		0			0		0			0		0			0		0			0		0			0		0			0
	0			0		0			0		0			0		0			0		0			0		0			0		0			0		0			0		0			0		0			0
	0			0		0			0		0			0		0			0		0			0		0			0		0			0		0			0		0			0		0			0
	0			0		0			0		0			0		0			0		0			0		0			0		0			0		0			0		0			0		0			0
	0			0		0			0		0			0		0			0		0			0		0			0		0			0		0			0		0			0		0			0
	0			0		0			0		0			0		0			0		0			0		0			0		0			0		0			0		0			0		0			0
	0			0		0			0		0			0		0			0		0			0		0			0		0			0		0			0		0			0		0			0
	0			0		0			0		0			0		0			0		0			0		0			0		0			0		0			0		0			0		0			0
	0			0		0			0		0			0		0			0		0			0		0			0		0			0		0			0		0			0		0			0
	0			0		0			0		0			0		0			0		0			0		0			0		0			0		0			0		0			0		0			0
	0			0		0			0		0			0		0			0		0			0		0			0		0			0		0			0		0			0		0			0
	0			0		0			0		0			0		0			0		0			0		0			0		0			0		0			0		0			0		0			0
	0			0		0			0		0			0		0			0		0			0		0			0		0			0		0			0		0			0		0			0
	0			0		0			0		0			0		0			0		0			0		0			0		0			0		0			0		0			0		0			0
	0			0		0			0		0			0		0			0		0			0		0			0		0			0		0			0		0			0		0			0
	0			0		0			0		0			0		0			0		0			0		0			0		0			0		0			0		0			0		0			0
	0			0		0			0		0			0		0			0		0			0		0			0		0			0		0			0		0			0		0			0
	0			0		0			0		0			0		0			0		0			0		0			0		0			0		0			0		0			0		0			0
	0			0		0			0		0			0		0			0		0			0		0			0		0			0		0			0		0			0		0			0
	0			0		0			0		0			0		0			0		0			0		0			0		0			0		0			0		0			0		0			0
	0			0		0			0		0			0		0			0		0			0		0			0		0			0		0			0		0			0		0			0
	0			0		0			0		0			0		0			0		0			0		0			0		0			0		0			0		0			0		0			0
	0			0		0			0		0			0		0			0		0			0		0			0		0			0		0			0		0			0		0			0
	0			0		0			0		0			0		0			0		0			0		0			0		0			0		0			0		0			0		0			0
	0			0		0			0		0			0		0			0		0			0		0			0		0			0		0			0		0			0		0			0
	0			0		0			0		0			0		0			0		0			0		0			0		0			0		0			0		0			0		0			0
	0			0		0			0		0			0		0			0		0			0		0			0		0			0		0			0		0			0		0			0
	0			0		0			0		0			0		0			0		0			0		0			0		0			0		0			0		0			0		0			0
	0			0		0			0		0			0		0			0		0			0		0			0		0			0		0			0		0			0		0			0
	0			0		0			0		0			0		0			0		0			0		0			0		0			0		0			0		0			0		0			0
	0			0		0			0		0			0		0			0		0			0		0			0		0			0		0			0		0			0		0			0
	0			0		0			0		0			0		0			0		0			0		0			0		0			0		0			0		0			0		0			0
	0			0		0			0		0			0		0			0		0			0		0			0		0			0		0			0		0			0		0			0
	0			0		0			0		0			0		0			0		0			0		0			0		0			0		0			0		0			0		0			0
	0			0		0			0		0			0		0			0		0			0		0			0		0			0		0			0		0			0		0			0
	0			0		0			0		0			0		0			0		0			0		0			0		0			0		0			0		0			0		0			0
	0			0		0			0		0			0		0			0		0			0		0			0		0			0		0			0		0			0		0			0
	0			0		0			0		0			0		0			0		0			0		0			0		0			0		0			0		0			0		0			0
	0			0		0			0		0			0		0			0		0			0		0			0		0			0		0			0		0			0		0			0
	0			0		0			0		0			0		0			0		0			0		0			0		0			0		0			0		0			0		0			0
	0			0		0			0		0			0		0			0		0			0		0			0		0			0		0			0		0			0		0			0
	0			0		0			0		0			0		0			0		0			0		0			0		0			0		0			0		0			0		0			0
	0			0		0			0		0			0		0			0		0			0		0			0		0			0		0			0		0			0		0			0
	0			0		0			0		0			0		0			0		0			0		0			0		0			0		0			0		0			0		0			0
	0			0		0			0		0			0		0			0		0			0		0			0		0			0		0			0		0			0		0			0
	0			0		0			0		0			0		0			0		0			0		0			0		0			0		0			0		0			0		0			0
	0			0		0			0		0			0		0			0		0			0		0			0		0			0		0			0		0			0		0			0
	0			0		0			0		0			0		0			0		0			0		0			0		0			0		0			0		0			0		0			0
	0			0		0			0		0			0		0			0		0			0		0			0		0			0		0			0		0			0		0			0
	0			0		0			0		0			0		0			0		0			0		0			0		0			0		0			0		0			0		0			0
	0			0		0			0		0			0		0			0		0			0		0			0		0			0		0			0		0			0		0			0
	0			0		0			0		0			0		0			0		0			0		0			0		0			0		0			0		0			0		0			0
	0			0		0			0		0			0		0			0		0			0		0			0		0			0		0			0		0			0		0			0
	0			0		0			0		0			0		0			0		0			0		0			0		0			0		0			0		0			0		0			0
	0			0		0			0		0			0		0			0		0			0		0			0		0			0		0			0		0			0		0			0
	0			0		0			0		0			0		0			0		0			0		0			0		0			0		0			0		0			0		0			0
	0			0		0			0		0			0		0			0		0			0		0			0		0			0		0			0		0			0		0			0
	0			0		0			0		0			0		0			0		0			0		0			0		0			0		0			0		0			0		0			0
	0			0		0			0		0			0		0			0		0			0		0			0		0			0		0			0		0			0		0			0
	0			0		0			0		0			0		0			0		0			0		0			0		0			0		0			0		0			0		0			0
	0			0		0			0		0			0		0			0		0			0		0			0		0			0		0			0		0			0		0			0
	0			0		0			0		0			0		0			0		0			0		0			0		0			0		0			0		0			0		0			0
	0			0		0			0		0			0		0			0		0			0		0			0		0			0		0			0		0			0		0			0
	0			0		0			0		0			0		0			0		0			0		0			0		0			0		0			0		0			0		0			0
	0			0		0			0		0			0		0			0		0			0		0			0		0			0		0			0		0			0		0			0
	0			0		0			0		0			0		0			0		0			0		0			0		0			0		0			0		0			0		0			0
	0			0		0			0		0			0		0			0		0			0		0			0		0			0		0			0		0			0		0			0
	0			0		0			0		0			0		0			0		0			0		0			0		0			0		0			0		0			0		0			0
	0			0		0			0		0			0		0			0		0			0		0			0		0			0		0			0		0			0		0			0
	0			0		0			0		0			0		0			0		0			0		0			0		0			0		0			0		0			0		0			0
	0			0		0			0		0			0		0			0		0			0		0			0		0			0		0			0		0			0		0			0
	0			0		0			0		0			0		0			0		0			0		0			0		0			0		0			0		0			0		0			0
	0			0		0			0		0			0		0			0		0			0		0			0		0			0		0			0		0			0		0			0
	0			0		0			0		0			0		0			0		0			0		0			0		0			0		0			0		0			0		0			0
	0			0		0			0		0			0		0			0		0			0		0			0		0			0		0			0		0			0		0			0
	0			0		0			0		0			0		0			0		0			0		0			0		0			0		0			0		0			0		0			0
	0			0		0			0		0			0		0			0		0			0		0			0		0			0		0			0		0			0		0			0
	0			0		0			0		0			0		0			0		0			0		0			0		0			0		0			0		0			0		0			0
	0			0		0			0		0			0		0			0		0			0		0			0		0			0		0			0		0			0		0			0
	0			0		0			0		0			0		0			0		0			0		0			0		0			0		0			0		0			0		0			0
	0			0		0			0		0			0		0			0		0			0		0			0		0			0		0			0		0			0		0			0
	0			0		0			0		0			0		0			0		0			0		0			0		0			0		0			0		0			0		0			0
	0			0		0			0		0			0		0			0		0			0		0			0		0			0		0			0		0			0		0			0
	0			0		0			0		0			0		0			0		0			0		0			0		0			0		0			0		0			0		0			0
	0			0		0			0		0			0		0			0		0			0		0			0		0			0		0			0		0			0		0			0
	0			0		0			0		0			0		0			0		0			0		0			0		0			0		0			0		0			0		0			0
	0			0		0			0		0			0		0			0		0			0		0			0		0			0		0			0		0			0		0			0
	0			0		0			0		0			0		0			0		0			0		0			0		0			0		0			0		0			0		0			0
	0			0		0			0		0			0		0			0		0			0		0			0		0			0		0			0		0			0		0			0
	0			0		0			0		0			0		0			0		0			0		0			0		0			0		0			0		0			0		0			0
	0			0		0			0		0			0		0			0		0			0		0			0		0			0		0			0		0			0		0			0
	0			0		0			0		0			0		0			0		0			0		0			0		0			0		0			0		0			0		0			0
	0			0		0			0		0			0		0			0		0			0		0			0		0			0		0			0		0			0		0			0
	0			0		0			0		0			0		0			0		0			0		0			0		0			0		0			0		0			0		0			0
	0			0		0			0		0			0		0			0		0			0		0			0		0			0		0			0		0			0		0			0
	0			0		0			0		0			0		0			0		0			0		0			0		0			0		0			0		0			0		0			0
	0			0		0			0		0			0		0			0		0			0		0			0		0			0		0			0		0			0		0			0
	0			0		0			0		0			0		0			0		0			0		0			0		0			0		0			0		0			0		0			0
	0			0		0			0		0			0		0			0		0			0		0			0		0			0		0			0		0			0		0			0
	0			0		0			0		0			0		0			0		0			0		0			0		0			0		0			0		0			0		0			0
	0			0		0			0		0			0		0			0		0			0		0			0		0			0		0			0		0			0		0			0
	0			0		0			0		0			0		0			0		0			0		0			0		0			0		0			0		0			0		0			0
	0			0		0			0		0			0		0			0		0			0		0			0		0			0		0			0		0			0		0			0
	0			0		0			0		0			0		0			0		0			0		0			0		0			0		0			0		0			0		0			0
	0			0		0			0		0			0		0			0		0			0		0			0		0			0		0			0		0			0		0			0
	0			0		0			0		0			0		0			0		0			0		0			0		0			0		0			0		0			0		0			0
	0			0		0			0		0			0		0			0		0			0		0			0		0			0		0			0		0			0		0			0
	0			0		0			0		0			0		0			0		0			0		0			0		0			0		0			0		0			0		0			0
	0			0		0			0		0			0		0			0		0			0		0			0		0			0		0			0		0			0		0			0
	0			0		0			0		0			0		0			0		0			0		0			0		0			0		0			0		0			0		0			0
	0			0		0			0		0			0		0			0		0			0		0			0		0			0		0			0		0			0		0			0
	0			0		0			0		0			0		0			0		0			0		0			0		0			0		0			0		0			0		0			0
	0			0		0			0		0			0		0			0		0			0		0			0		0			0		0			0		0			0		0			0
	0			0		0			0		0			0		0			0		0			0		0			0		0			0		0			0		0			0		0			0
	0			0		0			0		0			0		0			0		0			0		0			0		0			0		0			0		0			0		0			0
	0			0		0			0		0			0		0			0		0			0		0			0		0			0		0			0		0			0		0			0
	0			0		0			0		0			0		0			0		0			0		0			0		0			0		0			0		0			0		0			0
	0			0		0			0		0			0		0			0		0			0		0			0		0			0		0			0		0			0		0			0
	0			0		0			0		0			0		0			0		0			0		0			0		0			0		0			0		0			0		0			0
	0			0		0			0		0			0		0			0		0			0		0			0		0			0		0			0		0			0		0			0
	0			0		0			0		0			0		0			0		0			0		0			0		0			0		0			0		0			0		0			0
	0			0		0			0		0			0		0			0		0			0		0			0		0			0		0			0		0			0		0			0
	0			0		0			0		0			0		0			0		0			0		0			0		0			0		0			0		0			0		0			0
	0			0		0			0		0			0		0			0		0			0		0			0		0			0		0			0		0			0		0			0
	0			0		0			0		0			0		0			0		0			0		0			0		0			0		0			0		0			0		0			0
	0			0		0			0		0			0		0			0		0			0		0			0		0			0		0			0		0			0		0			0
	0			0		0			0		0			0		0			0		0			0		0			0		0			0		0			0		0			0		0			0
	0			0		0			0		0			0		0			0		0			0		0			0		0			0		0			0		0			0		0			0
	0			0		0			0		0			0		0			0		0			0		0			0		0			0		0			0		0			0		0			0
	0			0		0			0		0			0		0			0		0			0		0			0		0			0		0			0		0			0		0			0
	0			0		0			0		0			0		0			0		0			0		0			0		0			0		0			0		0			0		0			0
	0			0		0			0		0			0		0			0		0			0		0			0		0			0		0			0		0			0		0			0
	0			0		0			0		0			0		0			0		0			0		0			0		0			0		0			0		0			0		0			0
	0			0		0			0		0			0		0			0		0			0		0			0		0			0		0			0		0			0		0			0
	0			0		0			0		0			0		0			0		0			0		0			0		0			0		0			0		0			0		0			0
	0			0		0			0		0			0		0			0		0			0		0			0		0			0		0			0		0			0		0			0
	0			0		0			0		0			0		0			0		0			0		0			0		0			0		0			0		0			0		0			0
	0			0		0			0		0			0		0			0		0			0		0			0		0			0		0			0		0			0		0			0
	0			0		0			0		0			0		0			0		0			0		0			0		0			0		0			0		0			0		0			0
	0			0		0			0		0			0		0			0		0			0		0			0		0			0		0			0		0			0		0			0
	0			0		0			0		0			0		0			0		0			0		0			0		0			0		0			0		0			0		0			0
	0			0		0			0		0			0		0			0		0			0		0			0		0			0		0			0		0			0		0			0
	0			0		0			0		0			0		0			0		0			0		0			0		0			0		0			0		0			0		0			0
	0			0		0			0		0			0		0			0		0			0		0			0		0			0		0			0		0			0		0			0
	0			0		0			0		0			0		0			0		0			0		0			0		0			0		0			0		0			0		0			0
	0			0		0			0		0			0		0			0		0			0		0			0		0			0		0			0		0			0		0			0
	0			0		0			0		0			0		0			0		0			0		0			0		0			0		0			0		0			0		0			0
	0			0		0			0		0			0		0			0		0			0		0			0		0			0		0			0		0			0		0			0
	0			0		0			0		0			0		0			0		0			0		0			0		0			0		0			0		0			0		0			0
	0			0		0			0		0			0		0			0		0			0		0			0		0			0		0			0		0			0		0			0
	0			0		0			0		0			0		0			0		0			0		0			0		0			0		0			0		0			0		0			0
	0			0		0			0		0			0		0			0		0			0		0			0		0			0		0			0		0			0		0			0
	0			0		0			0		0			0		0			0		0			0		0			0		0			0		0			0		0			0		0			0
	0			0		0			0		0			0		0			0		0			0		0			0		0			0		0			0		0			0		0			0
	0			0		0			0		0			0		0			0		0			0		0			0		0			0		0			0		0			0		0			0
	0			0		0			0		0			0		0			0		0			0		0			0		0			0		0			0		0			0		0			0
	0			0		0			0		0			0		0			0		0			0		0			0		0			0		0			0		0			0		0			0
	0			0		0			0		0			0		0			0		0			0		0			0		0			0		0			0		0			0		0			0
	0			0		0			0		0			0		0			0		0			0		0			0		0			0		0			0		0			0		0			0
	0			0		0			0		0			0		0			0		0			0		0			0		0			0		0			0		0			0		0			0
	0			0		0			0		0			0		0			0		0			0		0			0		0			0		0			0		0			0		0			0
	0			0		0			0		0			0		0			0		0			0		0			0		0			0		0			0		0			0		0			0
	0			0		0			0		0			0		0			0		0			0		0			0		0			0		0			0		0			0		0			0
	0			0		0			0		0			0		0			0		0			0		0			0		0			0		0			0		0			0		0			0
	0			0		0			0		0			0		0			0		0			0		0			0		0			0		0			0		0			0		0			0
	0			0		0			0		0			0		0			0		0			0		0			0		0			0		0			0		0			0		0			0
	0			0		0			0		0			0		0			0		0			0		0			0		0			0		0			0		0			0		0			0
	0			0		0			0		0			0		0			0		0			0		0			0		0			0		0			0		0			0		0			0
	0			0		0			0		0			0		0			0		0			0		0			0		0			0		0			0		0			0		0			0
	0			0		0			0		0			0		0			0		0			0		0			0		0			0		0			0		0			0		0			0
	0			0		0			0		0			0		0			0		0			0		0			0		0			0		0			0		0			0		0			0
	0			0		0			0		0			0		0			0		0			0		0			0		0			0		0			0		0			0		0			0
	0			0		0			0		0			0		0			0		0			0		0			0		0			0		0			0		0			0		0			0
	0			0		0			0		0			0		0			0		0			0		0			0		0			0		0			0		0			0		0			0
	0			0		0			0		0			0		0			0		0			0		0			0		0			0		0			0		0			0		0			0
	0			0		0			0		0			0		0			0		0			0		0			0		0			0		0			0		0			0		0			0
	0			0		0			0		0			0		0			0		0			0		0			0		0			0		0			0		0			0		0			0
	0			0		0			0		0			0		0			0		0			0		0			0		0			0		0			0		0			0		0			0
	0			0		0			0		0			0		0			0		0			0		0			0		0			0		0			0		0			0		0			0
	0			0		0			0		0			0		0			0		0			0		0			0		0			0		0			0		0			0		0			0
	0			0		0			0		0			0		0			0		0			0		0			0		0			0		0			0		0			0		0			0
	0			0		0			0		0			0		0			0		0			0		0			0		0			0		0			0		0			0		0			0
	0			0		0			0		0			0		0			0		0			0		0			0		0			0		0			0		0			0		0			0
	0			0		0			0		0			0		0			0		0			0		0			0		0			0		0			0		0			0		0			0
	0			0		0			0		0			0		0			0		0			0		0			0		0			0		0			0		0			0		0			0
	0			0		0			0		0			0		0			0		0			0		0			0		0			0		0			0		0			0		0			0
	0			0		0			0		0			0		0			0		0			0		0			0		0			0		0			0		0			0		0			0
	0			0		0			0		0			0		0			0		0			0		0			0		0			0		0			0		0			0		0			0
	0			0		0			0		0			0		0			0		0			0		0			0		0			0		0			0		0			0		0			0
	0			0		0			0		0			0		0			0		0			0		0			0		0			0		0			0		0			0		0			0
	0			0		0			0		0			0		0			0		0			0		0			0		0			0		0			0		0			0		0			0
	0			0		0			0		0			0		0			0		0			0		0			0		0			0		0			0		0			0		0			0
	0			0		0			0		0			0		0			0		0			0		0			0		0			0		0			0		0			0		0			0
	0			0		0			0		0			0		0			0		0			0		0			0		0			0		0			0		0			0		0			0
	0			0		0			0		0			0		0			0		0			0		0			0		0			0		0			0		0			0		0			0
	0			0		0			0		0			0		0			0		0			0		0			0		0			0		0			0		0			0		0			0
	0			0		0			0		0			0		0			0		0			0		0			0		0			0		0			0		0			0		0			0
	0			0		0			0		0			0		0			0		0			0		0			0		0			0		0			0		0			0		0			0
	0			0		0			0		0			0		0			0		0			0		0			0		0			0		0			0		0			0		0			0
	0			0		0			0		0			0		0			0		0			0		0			0		0			0		0			0		0			0		0			0
	0			0		0			0		0			0		0			0		0			0		0			0		0			0		0			0		0			0		0			0
	0			0		0			0		0			0		0			0		0			0		0			0		0			0		0			0		0			0		0			0
	0			0		0			0		0			0		0			0		0			0		0			0		0			0		0			0		0			0		0			0
	0			0		0			0		0			0		0			0		0			0		0			0		0			0		0			0		0			0		0			0
	0			0		0			0		0			0		0			0		0			0		0			0		0			0		0			0		0			0		0			0
	0			0		0			0		0			0		0			0		0			0		0			0		0			0		0			0		0			0		0			0
	0			0		0			0		0			0		0			0		0			0		0			0		0			0		0			0		0			0		0			0
	0			0		0			0		0			0		0			0		0			0		0			0		0			0		0			0		0			0		0			0
	0			0		0			0		0			0		0			0		0			0		0			0		0			0		0			0		0			0		0			0
	0			0		0			0		0			0		0			0		0			0		0			0		0			0		0			0		0			0		0			0
	0			0		0			0		0			0		0			0		0			0		0			0		0			0		0			0		0			0		0			0
	0			0		0			0		0			0		0			0		0			0		0			0		0			0		0			0		0			0		0			0
	0			0		0			0		0			0		0			0		0			0		0			0		0			0		0			0		0			0		0			0
	0			0		0			0		0			0		0			0		0			0		0			0		0			0		0			0		0			0		0			0
	0			0		0			0		0			0		0			0		0			0		0			0		0			0		0			0		0			0		0			0
	0			0		0			0		0			0		0			0		0			0		0			0		0			0		0			0		0			0		0			0
	0			0		0			0		0			0		0			0		0			0		0			0		0			0		0			0		0			0		0			0

## Sheet: raw data PDMS 2.5MPa full AB
		2021-03-24 SUBSTRATE prim T cell full AB PDMS 2.5 MPa cell 2-1					2021-03-24 SUBSTRATE prim T cell full AB PDMS 2.5 MPa cell 3-1					2021-03-24 SUBSTRATE prim T cell full AB PDMS 2.5 MPa cell 4-1					2021-03-24 SUBSTRATE prim T cell full AB PDMS 2.5 MPa cell 5-1					2021-04-21 SUBSTRATE prim T cell full AB PDMS 2.5 MPa cell 1-1					2021-04-21 SUBSTRATE prim T cell full AB PDMS 2.5 MPa cell 3-1					2021-04-28 SUBSTRATE prim T cell full AB PDMS 2.5 MPa cell 1-1					2021-04-29 SUBSTRATE prim T cell full AB PDMS 2.5 MPa cell 3-1					2021-04-29 SUBSTRATE prim T cell full AB PDMS 2.5 MPa cell 4-1					2021-04-29 SUBSTRATE prim T cell full AB PDMS 2.5 MPa cell 4-1
		Average	353.526				Average	461.836				Average	0.526249				Average	337.728				Average	0.906971				Average	282.388				Average	353.618				Average	2.0749				Average	1.03639				Average	0.477108
		StDev	116.234				StDev	79.0107				StDev	0.151937				StDev	151.405				StDev	0.209852				StDev	75.7394				StDev	92.7843				StDev	0.401215				StDev	0.224882				StDev	0.157532
				setp					setp					setp					setp					setp					setp					setp					setp					setp					setp
		kPa	%				kPa	%				MPa	%				kPa	%				MPa	%				kPa	%				kPa	%				MPa	%				MPa	%				MPa	%
	0	0	0.0545554	68.1838		0	0	0.148148	315.988		0	0	0.0793651	0.000219792		0	0	0.113122	129.027		0	0	0.141844	0.0011668		0	0	0.0645161	51.4471		0	0	0.134953	168.753		0	0	0.490196	0.021104		0	0	0.140056	0.00150433		0	0	0.427351	0.000972786
	0	1.87822	0	0		0	1.41752	0	0		0	0.00250429	0	0		0	1.72465	0	0		0	0.00328078	0	0		0	1.27778	0	0		0	1.27171	0	0		0	0.00557879	0	0		0	0.00334289	0	0		0	0.00213726	0	0
	0	3.75644	0	0		0	2.83505	0	0		0	0.00500859	0	0		0	3.44931	0	0		0	0.00656156	0	0		0	2.55556	0	0		0	2.54342	0	0		0	0.0111576	0	0		0	0.00668578	0	0		0	0.00427452	0	0
	0	5.63466	0	0		0	4.25257	0	0		0	0.00751288	0	0		0	5.17396	0	0		0	0.00984235	0	0		0	3.83333	0	0		0	3.81514	0	0		0	0.0167364	0	0		0	0.0100287	0	0		0	0.00641177	0	0
	0	7.51288	0	0		0	5.6701	0	0		0	0.0100172	0	0		0	6.89862	0	0		0	0.0131231	0	0		0	5.11111	0	0		0	5.08685	0	0		0	0.0223152	0	0		0	0.0133716	0	0		0	0.00854903	0	0
	0	9.3911	0	0		0	7.08762	0	0		0	0.0125215	0	0		0	8.62327	0	0		0	0.0164039	0	0		0	6.38889	0	0		0	6.35856	0	0		0	0.027894	0	0		0	0.0167145	0	0		1.52226e-05	0.0106863	0.14245	0.000309899
	0	11.2693	0	0		0	8.50515	0	0		0	0.0150257	0	0		0	10.3479	0	0		0	0.0196847	0	0		0	7.66667	0	0		0	7.63027	0	0		0	0.0334728	0	0		0	0.0200574	0	0		0	0.0128235	0	0
	0	13.1475	0	0		0	9.92267	0	0		0	0.01753	0	0		0	12.0726	0	0		0	0.0229655	0	0		0	8.94445	0	0		0	8.90198	0	0		0	0.0390515	0	0		0	0.0234002	0	0		0	0.0149608	0	0
	0	15.0258	0	0		0	11.3402	0	0		0	0.0200343	0	0		0	13.7972	0	0		0	0.0262462	0	0		0	10.2222	0	0		0	10.1737	0	0		0	0.0446303	0	0		0	0.0267431	0	0		0	0.0170981	0	0
	0	16.904	0	0		0	12.7577	0	0		0	0.0225386	0	0		0	15.5219	0	0		0	0.029527	0	0		0	11.5	0	0		0	11.4454	0	0		0	0.0502091	0	0		0	0.030086	0	0		0	0.0192353	0	0
	0	18.7822	0	0		0	14.1752	0	0		0	0.0250429	0	0		0	17.2465	0	0		0	0.0328078	0	0		0	12.7778	0	0		0	12.7171	0	0		0	0.0557879	0	0		0	0.0334289	0	0		0	0.0213726	0	0
	0	20.6604	0	0		0	15.5928	0	0		0	0.0275472	0	0		0	18.9712	0	0		0	0.0360886	0	0		0	14.0556	0	0		0	13.9888	0	0		0	0.0613667	0	0		0	0.0367718	0	0		0	0.0235098	0	0
	0	22.5386	0	0		0	17.0103	0	0		0	0.0300515	0	0		0	20.6959	0	0		0	0.0393694	0	0		0	15.3333	0	0		0	15.2605	0	0		0	0.0669455	0	0		0	0.0401147	0	0		0	0.0256471	0	0
	0.0133207	24.4169	0.0545554	59.0906		0	18.4278	0	0		0	0.0325558	0	0		0	22.4205	0	0		0	0.0426502	0	0		0	16.6111	0	0		0	16.5323	0	0		0	0.0725243	0	0		0	0.0434576	0	0		0	0.0277844	0	0
	0	26.2951	0	0		0	19.8453	0	0		0	0.0350601	0	0		0	24.1452	0	0		0	0.0459309	0	0		0	17.8889	0	0		0	17.804	0	0		0	0.0781031	0	0		0	0.0468005	0	0		0	0.0299216	0	0
	0	28.1733	0	0		0	21.2629	0	0		0	0.0375644	0	0		0	25.8698	0	0		0	0.0492117	0	0		0	19.1667	0	0		0	19.0757	0	0		0	0.0836819	0	0		0	0.0501434	0	0		0	0.0320589	0	0
	0	30.0515	0	0		0	22.6804	0	0		0	0.0400687	0	0		0	27.5945	0	0		0	0.0524925	0	0		0	20.4444	0	0		0	20.3474	0	0		0	0.0892607	0	0		0	0.0534863	0	0		0	0.0341961	0	0
	0	31.9297	0	0		0	24.0979	0	0		0	0.042573	0	0		0	29.3191	0	0		0	0.0557733	0	0		0	21.7222	0	0		0	21.6191	0	0		0	0.0948395	0	0		0	0.0568292	0	0		0	0.0363334	0	0
	0	33.8079	0	0		0	25.5154	0	0		0	0.0450773	0	0		0	31.0438	0	0		0	0.0590541	0	0		0	23	0	0		0	22.8908	0	0		0	0.100418	0	0		0	0.060172	0	0		5.48015e-05	0.0384707	0.14245	0.000274078
	0.0194687	35.6862	0.0545554	55.1132		0	26.933	0	0		0	0.0475816	0	0		0	32.7684	0	0		0	0.0623348	0	0		0	24.2778	0	0		0	24.1625	0	0		0	0.105997	0	0		0	0.0635149	0	0		0	0.0406079	0	0
	0	37.5644	0	0		0	28.3505	0	0		0	0.0500859	0	0		0	34.4931	0	0		0	0.0656156	0	0		0	25.5556	0	0		0	25.4342	0	0		0	0.111576	0	0		0	0.0668578	0	0		0	0.0427452	0	0
	0	39.4426	0	0		0	29.768	0	0		0	0.0525902	0	0		0	36.2177	0	0		0	0.0688964	0	0		0.0173118	26.8333	0.0645161	42.1344		0	26.706	0	0		0	0.117155	0	0		0	0.0702007	0	0		0	0.0448824	0	0
	0	41.3208	0	0		0	31.1855	0	0		0	0.0550944	0	0		0	37.9424	0	0		0	0.0721772	0	0		0	28.1111	0	0		0	27.9777	0	0		0	0.122733	0	0		0	0.0735436	0	0		0	0.0470197	0	0
	0	43.199	0	0		0	32.6031	0	0		0	0.0575987	0	0		0	39.6671	0	0		0	0.075458	0	0		0	29.3889	0	0		0	29.2494	0	0		0	0.128312	0	0		0	0.0768865	0	0		0	0.0491569	0	0
	0	45.0773	0	0		0	34.0206	0	0		0	0.060103	0	0		0	41.3917	0	0		0	0.0787388	0	0		0	30.6667	0	0		0	30.5211	0	0		0	0.133891	0	0		0	0.0802294	0	0		0	0.0512942	0	0
	0	46.9555	0	0		0	35.4381	0	0		0	0.0626073	0	0		0.0487742	43.1164	0.113122	98.1855		0	0.0820195	0	0		0	31.9445	0	0		0	31.7928	0	0		0	0.13947	0	0		0	0.0835723	0	0		0	0.0534315	0	0
	0.0266414	48.8337	0.0545554	50.6479		0	36.8556	0	0		0	0.0651116	0	0		0	44.841	0	0		0	0.0853003	0	0		0	33.2222	0	0		0	33.0645	0	0		0	0.145049	0	0		0	0.0869152	0	0		7.91577e-05	0.0555687	0.14245	0.000253127
	0	50.7119	0	0		0	38.2732	0	0		0	0.0676159	0	0		0	46.5657	0	0		0	0.0885811	0	0		0	34.5	0	0		0	34.3362	0	0		0	0.150627	0	0		0	0.0902581	0	0		0	0.057706	0	0
	0	52.5901	0	0		0	39.6907	0	0		0	0.0701202	0	0		0.0546271	48.2903	0.113122	94.7671		0	0.0918619	0	0		0.0230824	35.7778	0.0645161	39.2366		0	35.6079	0	0		0	0.156206	0	0		0	0.093601	0	0		0	0.0598432	0	0
	0	54.4684	0	0		0	41.1082	0	0		5.76385e-05	0.0726245	0.0793651	0.000163314		0	50.015	0	0		0	0.0951427	0	0		0	37.0556	0	0		0	36.8796	0	0		0	0.161785	0	0		0	0.0969439	0	0		0.000264874	0.0619805	0.427351	0.000736456
	0	56.3466	0	0		0	42.5257	0	0		0	0.0751288	0	0		0	51.7396	0	0		0	0.0984234	0	0		0	38.3334	0	0		0	38.1514	0	0		0	0.167364	0	0		0	0.100287	0	0		0	0.0641178	0	0
	0	58.2248	0	0		0	43.9432	0	0		0	0.0776331	0	0		0	53.4643	0	0		0	0.101704	0	0		0	39.6111	0	0		0	39.4231	0	0		0	0.172943	0	0		0	0.10363	0	0		9.43803e-05	0.066255	0.14245	0.000240456
	0	60.103	0	0		0	45.3608	0	0		0	0.0801374	0	0		0.0624309	55.1889	0.113122	90.3035		0	0.104985	0	0		0	40.8889	0	0		0	40.6948	0	0		0	0.178521	0	0		0	0.106972	0	0		0	0.0683923	0	0
	0	61.9812	0	0		0	46.7783	0	0		0	0.0826417	0	0		0	56.9136	0	0		0	0.108266	0	0		0	42.1667	0	0		0	41.9665	0	0		0	0.1841	0	0		0	0.110315	0	0		0	0.0705295	0	0
	0	63.8595	0	0		0	48.1958	0	0		0	0.0851459	0	0		0	58.6382	0	0		0	0.111547	0	0		0	43.4445	0	0		0	43.2382	0	0		0	0.189679	0	0		0	0.113658	0	0		0.000103514	0.0726668	0.14245	0.000233009
	0	65.7377	0	0		0	49.6133	0	0		0	0.0876502	0	0		0	60.3629	0	0		0	0.114827	0	0		0	44.7222	0	0		0	44.5099	0	0		0	0.195258	0	0		0	0.117001	0	0		0	0.074804	0	0
	0	67.6159	0	0		0	51.0309	0	0		0	0.0901545	0	0		0	62.0876	0	0		0	0.118108	0	0		0	46	0	0		0	45.7816	0	0		0	0.200837	0	0		0	0.120344	0	0		0	0.0769413	0	0
	0	69.4941	0	0		0	52.4484	0	0		0	0.0926588	0	0		0	63.8122	0	0		0	0.121389	0	0		0	47.2778	0	0		0	47.0533	0	0		0	0.206415	0	0		0	0.123687	0	0		0	0.0790786	0	0
	0	71.3723	0	0		0	53.8659	0	0		0	0.0951631	0	0		0	65.5369	0	0		0	0.12467	0	0		0	48.5556	0	0		0	48.325	0	0		0	0.211994	0	0		0	0.12703	0	0		0	0.0812158	0	0
	0.0399621	73.2506	0.0545554	42.8557		0	55.2834	0	0		0	0.0976674	0	0		0.0760877	67.2615	0.113122	82.7512		0	0.12795	0	0		0	49.8334	0	0		0	49.5968	0	0		0	0.217573	0	0		0	0.130373	0	0		0	0.0833531	0	0
	0	75.1288	0	0		0	56.701	0	0		0	0.100172	0	0		0	68.9862	0	0		0	0.131231	0	0		0	51.1111	0	0		0	50.8685	0	0		0	0.223152	0	0		0	0.133716	0	0		0	0.0854903	0	0
	0	77.007	0	0		0	58.1185	0	0		0	0.102676	0	0		0	70.7108	0	0		0	0.134512	0	0		0	52.3889	0	0		0	52.1402	0	0		0	0.228731	0	0		0	0.137059	0	0		0	0.0876276	0	0
	0.0430361	78.8852	0.0545554	41.1499		0	59.536	0	0		0	0.10518	0	0		0.163881	72.4355	0.226244	159.231		0	0.137793	0	0		0	53.6667	0	0		0	53.4119	0	0		0	0.234309	0	0		0	0.140402	0	0		0.00012787	0.0897649	0.14245	0.000213725
	0	80.7634	0	0		0	60.9535	0	0		0	0.107685	0	0		0	74.1601	0	0		0	0.141074	0	0		0	54.9445	0	0		0	54.6836	0	0		0	0.239888	0	0		0	0.143744	0	0		0	0.0919021	0	0
	0	82.6416	0	0		0	62.3711	0	0		0	0.110189	0	0		0	75.8848	0	0		0	0.144354	0	0		0	56.2222	0	0		0.0755133	55.9553	0.134953	119.573		0	0.245467	0	0		0	0.147087	0	0		0	0.0940394	0	0
	0.0461101	84.5199	0.0545554	39.4787		0	63.7886	0	0		0	0.112693	0	0		0	77.6094	0	0		0	0.147635	0	0		0	57.5	0	0		0	57.227	0	0		0	0.251046	0	0		0	0.15043	0	0		0	0.0961766	0	0
	0	86.3981	0	0		0	65.2061	0	0		0	0.115197	0	0		0.0897445	79.3341	0.113122	75.5287		0	0.150916	0	0		0	58.7778	0	0		0	58.4987	0	0		0	0.256624	0	0		0	0.153773	0	0		0	0.0983139	0	0
	0	88.2763	0	0		0	66.6236	0	0		0	0.117702	0	0		0	81.0588	0	0		0	0.154197	0	0		0	60.0556	0	0		0	59.7704	0	0		0	0.262203	0	0		0	0.157116	0	0		0.000143093	0.100451	0.14245	0.000202094
	0.0983683	90.1545	0.109111	75.6844		0	68.0412	0	0		0	0.120206	0	0		0	82.7834	0	0		0	0.157477	0	0		0.0791398	61.3334	0.129032	63.0519		0	61.0422	0	0		0	0.267782	0	0		0	0.160459	0	0		0	0.102588	0	0
	0	92.0327	0	0		0	69.4587	0	0		0	0.12271	0	0		0.0955974	84.5081	0.113122	72.5343		0	0.160758	0	0		0	62.6111	0	0		0	62.3139	0	0		0	0.273361	0	0		0	0.163802	0	0		0	0.104726	0	0
	0	93.911	0	0		0	70.8762	0	0		0	0.125215	0	0		0	86.2327	0	0		0	0.164039	0	0		0	63.8889	0	0		0	63.5856	0	0		0	0.27894	0	0		0	0.167145	0	0		0.000304453	0.106863	0.2849	0.000390545
	0.104516	95.7892	0.109111	72.4806		0	72.2937	0	0		0	0.127719	0	0		0	87.9574	0	0		0	0.16732	0	0		0	65.1667	0	0		0	64.8573	0	0		0	0.284518	0	0		0	0.170487	0	0		0	0.109	0	0
	0	97.6674	0	0		0	73.7113	0	0		0	0.130223	0	0		0	89.682	0	0		0	0.170601	0	0		0	66.4445	0	0		0	66.129	0	0		0	0.290097	0	0		0	0.17383	0	0		0.000158315	0.111137	0.14245	0.00019079
	0	99.5456	0	0		0	75.1288	0	0		0	0.132727	0	0		0.103401	91.4067	0.113122	68.6359		0	0.173881	0	0		0	67.7223	0	0		0	67.4007	0	0		0	0.295676	0	0		0	0.177173	0	0		0	0.113275	0	0
	0	101.424	0	0		0	76.5463	0	0		0	0.135232	0	0		0	93.1313	0	0		0	0.177162	0	0		0	69	0	0		0	68.6724	0	0		0	0.301255	0	0		0	0.180516	0	0		0	0.115412	0	0
	0.112714	103.302	0.109111	68.3167		0	77.9638	0	0		0.000109314	0.137736	0.0793651	0.000119796		0	94.856	0	0		0	0.180443	0	0		0.136022	70.2778	0.193548	87.079		0	69.9441	0	0		0	0.306834	0	0		0	0.183859	0	0		0	0.117549	0	0
	0	105.18	0	0		0	79.3813	0	0		0	0.14024	0	0		0	96.5806	0	0		0	0.183724	0	0		0	71.5556	0	0		0	71.2159	0	0		0	0.312412	0	0		0	0.187202	0	0		0	0.119687	0	0
	0	107.058	0	0		0	80.7989	0	0		0	0.142745	0	0		0	98.3053	0	0		0	0.187005	0	0		0	72.8334	0	0		0	72.4876	0	0		0	0.317991	0	0		0	0.190545	0	0		0	0.121824	0	0
	0.118862	108.937	0.109111	65.2746		0	82.2164	0	0		0	0.145249	0	0		0	100.03	0	0		0	0.190285	0	0		0	74.1111	0	0		0	73.7593	0	0		0	0.32357	0	0		0	0.193888	0	0		0.000176583	0.123961	0.14245	0.000177653
	0	110.815	0	0		0	83.6339	0	0		0	0.147753	0	0		0	101.755	0	0		0	0.193566	0	0		0	75.3889	0	0		0	75.031	0	0		0	0.329149	0	0		0	0.197231	0	0		0	0.126098	0	0
	0	112.693	0	0		0	85.0515	0	0		0.000119252	0.150258	0.0793651	0.000112198		0.468232	103.479	0.452489	248.292		0	0.196847	0	0		0	76.6667	0	0		0	76.3027	0	0		0	0.334728	0	0		0	0.200573	0	0		0.000365343	0.128236	0.2849	0.000346758
	0	114.571	0	0		0	86.469	0	0		0	0.152762	0	0		0	105.204	0	0		0	0.200128	0	0		0	77.9445	0	0		0	77.5744	0	0		0	0.340306	0	0		0	0.203916	0	0		0	0.130373	0	0
	0	116.45	0	0		0	87.8865	0	0		0	0.155266	0	0		0	106.929	0	0		0	0.203408	0	0		0.0511111	79.2223	0.0645161	26.6299		0	78.8461	0	0		0	0.345885	0	0		0	0.207259	0	0		0	0.13251	0	0
	0	118.328	0	0		0	89.304	0	0		0.000125215	0.15777	0.0793651	0.000107759		0.368733	108.653	0.339367	178.083		0	0.206689	0	0		0	80.5	0	0		0	80.1178	0	0		0	0.351464	0	0		0	0.210602	0	0		0.000191805	0.134647	0.14245	0.000167064
	0.196736	120.206	0.163666	89.0972		0	90.7215	0	0		0	0.160275	0	0		0	110.378	0	0		0	0.20997	0	0		0	81.7778	0	0		0	81.3895	0	0		0	0.357043	0	0		0	0.213945	0	0		0	0.136785	0	0
	0	122.084	0	0		0	92.1391	0	0		0.00012919	0.162779	0.0793651	0.00010485		0	112.103	0	0		0	0.213251	0	0		0	83.0556	0	0		0	82.6613	0	0		0	0.362621	0	0		0	0.217288	0	0		0	0.138922	0	0
	0	123.963	0	0		0	93.5566	0	0		0	0.165283	0	0		0	113.827	0	0		0	0.216532	0	0		0	84.3334	0	0		0	83.933	0	0		0	0.3682	0	0		0	0.220631	0	0		0.000200939	0.141059	0.14245	0.000160867
	0.48057	125.841	0.381888	197.973		0	94.9741	0	0		0	0.167788	0	0		0.261429	115.552	0.226244	111.679		0	0.219812	0	0		0	85.6111	0	0		0	85.2047	0	0		0	0.373779	0	0		0	0.223974	0	0		0	0.143196	0	0
	0	127.719	0	0		0	96.3916	0	0		0	0.170292	0	0		0	117.276	0	0		0	0.223093	0	0		0	86.8889	0	0		0	86.4764	0	0		0	0.379358	0	0		0	0.227317	0	0		0	0.145334	0	0
	0	129.597	0	0		0	97.8092	0	0		0	0.172796	0	0		0	119.001	0	0		0	0.226374	0	0		0.113764	88.1667	0.129032	48.6735		0	87.7481	0	0		0	0.384937	0	0		0	0.230659	0	0		0	0.147471	0	0
	0	131.475	0	0		0	99.2267	0	0		0.000139127	0.1753	0.0793651	9.775e-05		0.682838	120.726	0.565611	266.346		0.000325751	0.229655	0.141844	0.00065072		0	89.4445	0	0		0	89.0198	0	0		0	0.390516	0	0		0	0.234002	0	0		0	0.149608	0	0
	0	133.354	0	0		0	100.644	0	0		0	0.177805	0	0		0	122.451	0	0		0	0.232935	0	0		0	90.7223	0	0		0	90.2915	0	0		0	0.396094	0	0		0	0.237345	0	0		0.000432323	0.151745	0.2849	0.000301598
	0	135.232	0	0		0	102.062	0	0		0.000429307	0.180309	0.238095	0.00028494		0	124.175	0	0		0	0.236216	0	0		0	92	0	0		0	91.5632	0	0		0	0.401673	0	0		0	0.240688	0	0		0	0.153883	0	0
	0	137.11	0	0		0	103.479	0	0		0	0.182813	0	0		0	125.9	0	0		0	0.239497	0	0		0	93.2778	0	0		0	92.835	0	0		0	0.407252	0	0		0	0.244031	0	0		0.000222251	0.15602	0.14245	0.000146863
	0.227477	138.988	0.163666	75.33		0	104.897	0	0		0	0.185318	0	0		1.0106	127.624	0.791855	349.553		0	0.242778	0	0		0	94.5556	0	0		0	94.1067	0	0		0	0.412831	0	0		0	0.247374	0	0		0	0.158157	0	0
	0	140.867	0	0		0	106.314	0	0		0.00029813	0.187822	0.15873	0.000181799		0	129.349	0	0		0.000349019	0.246059	0.141844	0.000619582		0	95.8334	0	0		0	95.3784	0	0		0	0.418409	0	0		0	0.250717	0	0		0	0.160294	0	0
	0	142.745	0	0		0	107.732	0	0		0	0.190326	0	0		0	131.074	0	0		0	0.249339	0	0		0.125305	97.1111	0.129032	44.2937		0	96.6501	0	0		0	0.423988	0	0		0	0.25406	0	0		0	0.162432	0	0
	0.394498	144.623	0.272777	119.042		0	109.149	0	0		0	0.19283	0	0		1.2018	132.798	0.904977	380.055		0	0.25262	0	0		0	98.3889	0	0		0	97.9218	0	0		0	0.429567	0	0		0	0.257403	0	0		0	0.164569	0	0
	0	146.501	0	0		0	110.567	0	0		0	0.195335	0	0		0	134.523	0	0		0	0.255901	0	0		0	99.6667	0	0		0	99.1935	0	0		0	0.435146	0	0		0	0.260746	0	0		0	0.166706	0	0
	0	148.379	0	0		0	111.984	0	0		0	0.197839	0	0		0	136.248	0	0		0	0.259182	0	0		0	100.945	0	0		0.271161	100.465	0.269906	172.973		0	0.440725	0	0		0	0.264088	0	0		0.000962071	0.168843	0.569801	0.000541465
	0.491842	150.258	0.327332	135.248		0	113.402	0	0		0.000318005	0.200343	0.15873	0.000168595		0	137.972	0	0		0	0.262462	0	0		0	102.222	0	0		0	101.737	0	0		0	0.446303	0	0		0	0.267431	0	0		0	0.170981	0	0
	0	152.136	0	0		0	114.82	0	0		0	0.202848	0	0		0.632113	139.697	0.452489	177.449		0	0.265743	0	0		0	103.5	0	0		0	103.009	0	0		0	0.451882	0	0		0	0.270774	0	0		0.00073982	0.173118	0.427351	0.000394914
	0	154.014	0	0		0	116.237	0	0		0.000488933	0.205352	0.238095	0.000245179		0	141.422	0	0		0	0.269024	0	0		0	104.778	0	0		0	104.28	0	0		0	0.457461	0	0		0	0.274117	0	0		0	0.175255	0	0
	0	155.892	0	0		0	117.654	0	0		0	0.207856	0	0		0	143.146	0	0		0	0.272305	0	0		0.273692	106.056	0.258064	80.2404		0	105.552	0	0		0	0.46304	0	0		0	0.27746	0	0		0	0.177393	0	0
	0.344289	157.77	0.218222	83.6234		0	119.072	0	0		0.000834764	0.210361	0.396825	0.000395975		1.96657	144.871	1.35747	504.893		0	0.275586	0	0		0	107.333	0	0		0.144162	106.824	0.134953	82.1964		0	0.468619	0	0		0	0.280803	0	0		0.00102296	0.17953	0.569801	0.000504574
	0	159.649	0	0		0	120.49	0	0		0	0.212865	0	0		0	146.596	0	0		0	0.278866	0	0		0	108.611	0	0		0	108.096	0	0		0	0.474197	0	0		0	0.284146	0	0		0	0.181667	0	0
	0	161.527	0	0		0	121.907	0	0		0	0.215369	0	0		0	148.32	0	0		0	0.282147	0	0		0	109.889	0	0		0	109.367	0	0		0	0.479776	0	0		0	0.287489	0	0		0.00104732	0.183804	0.569801	0.000490183
	0.624024	163.405	0.381888	138.037		0	123.325	0	0		0	0.217873	0	0		0	150.045	0	0		0	0.285428	0	0		0	111.167	0	0		0	110.639	0	0		0	0.485355	0	0		0	0.290832	0	0		0	0.185942	0	0
	0	165.283	0	0		0	124.742	0	0		0	0.220378	0	0		1.88854	151.77	1.24434	430.3		0	0.288709	0	0		0	112.445	0	0		0	111.911	0	0		0	0.490934	0	0		0	0.294175	0	0		0	0.188079	0	0
	0	167.161	0	0		0	126.16	0	0		0.00017689	0.222882	0.0793651	7.3041e-05		0	153.494	0	0		0.00041417	0.29199	0.141844	0.000536457		0	113.722	0	0		0	113.182	0	0		0	0.496513	0	0		0	0.297517	0	0		0.000541926	0.190216	0.2849	0.000234493
	0.737762	169.04	0.436443	148.545		0	127.577	0	0		0	0.225386	0	0		0	155.219	0	0		0	0.29527	0	0		0.370968	115	0.322581	90.3832		0	114.454	0	0		0	0.502091	0	0		0	0.30086	0	0		0	0.192353	0	0
	0	170.918	0	0		0	128.995	0	0		0	0.227891	0	0		0.88769	156.944	0.565611	184.859		0	0.298551	0	0		0	116.278	0	0		0	115.726	0	0		0	0.50767	0	0		0	0.304203	0	0		0	0.194491	0	0
	0	172.796	0	0		0	130.412	0	0		0.000365706	0.230395	0.15873	0.000138936		0	158.668	0	0		0	0.301832	0	0		0	117.556	0	0		0	116.998	0	0		0	0.513249	0	0		0	0.307546	0	0		0.000280096	0.196628	0.14245	0.000112064
	0.66706	174.674	0.381888	122.158		0	131.83	0	0		0	0.232899	0	0		0	160.393	0	0		0	0.305113	0	0		0	118.833	0	0		0.159608	118.269	0.134953	74.7493		0	0.518828	0	0		0	0.310889	0	0		0	0.198765	0	0
	0	176.553	0	0		0	133.247	0	0		0.000560485	0.235403	0.238095	0.000201408		0	162.118	0	0		0	0.308393	0	0		0	120.111	0	0		0	119.541	0	0		0	0.524407	0	0		0	0.314232	0	0		0.000572371	0.200902	0.2849	0.000217349
	0	178.431	0	0		0	134.665	0	0		0	0.237908	0	0		2.03876	163.842	1.24434	376.243		0	0.311674	0	0		0	121.389	0	0		0	120.813	0	0		0	0.529985	0	0		0	0.317575	0	0		0	0.20304	0	0
	1.47552	180.309	0.818331	245.534		0	136.082	0	0		0.00057241	0.240412	0.238095	0.000194531		0	165.567	0	0		0	0.314955	0	0		0	122.667	0	0		0	122.084	0	0		0	0.535564	0	0		0	0.320918	0	0		0	0.205177	0	0
	0	182.187	0	0		0	137.5	0	0		0	0.242916	0	0		0	167.292	0	0		0	0.318236	0	0		0.479785	123.945	0.387097	97.1783		0.166472	123.356	0.134953	71.5529		0	0.541143	0	0		0	0.324261	0	0		0.000590638	0.207314	0.2849	0.000207375
	0	184.065	0	0		0	138.917	0	0		0	0.245421	0	0		2.29434	169.016	1.35747	386.385		0	0.321517	0	0		0	125.222	0	0		0	124.628	0	0		0	0.546722	0	0		0	0.327603	0	0		0	0.209451	0	0
	0	185.944	0	0		0	140.335	0	0		0.000196766	0.247925	0.0793651	6.14797e-05		0	170.741	0	0		0	0.324797	0	0		0	126.5	0	0		0	125.9	0	0		0	0.5523	0	0		0.00046351	0.330946	0.140056	0.000696981		0	0.211589	0	0
	0.819736	187.822	0.436443	119.838		0	141.752	0	0		0	0.250429	0	0		0	172.465	0	0		0	0.328078	0	0		0	127.778	0	0		0	127.171	0	0		0	0.557879	0	0		0	0.334289	0	0		0.000304453	0.213726	0.14245	9.88178e-05
	0	189.7	0	0		0	143.17	0	0		0.000200741	0.252933	0.0793651	5.92869e-05		0	174.19	0	0		0	0.331359	0	0		0	129.056	0	0		0.346674	128.443	0.269906	136.853		0	0.563458	0	0		0	0.337632	0	0		0	0.215863	0	0
	0	191.578	0	0		0	144.588	0	0		0	0.255438	0	0		0.596996	175.915	0.339367	88.8581		0	0.33464	0	0		0	130.333	0	0		0	129.715	0	0		0	0.569037	0	0		0	0.340975	0	0		0.000621084	0.218	0.2849	0.000191273
	1.26649	193.457	0.654664	167.74		0	146.005	0	0		0	0.257942	0	0		0	177.639	0	0		0	0.337921	0	0		0	131.611	0	0		0	130.986	0	0		0	0.574616	0	0		0	0.344318	0	0		0	0.220138	0	0
	0	195.335	0	0		0	147.423	0	0		0.000413407	0.260446	0.15873	0.000112145		0	179.364	0	0		0	0.341201	0	0		1.02882	132.889	0.774193	173.032		0	132.258	0	0		0	0.580194	0	0		0	0.347661	0	0		0	0.222275	0	0
	0	197.213	0	0		0	148.84	0	0		0	0.262951	0	0		2.86792	181.089	1.58371	388.577		0	0.344482	0	0		0	134.167	0	0		0	133.53	0	0		0	0.585773	0	0		0	0.351004	0	0		0.000319675	0.224412	0.14245	9.09618e-05
	2.1723	199.091	1.09111	260.231		0	150.258	0	0		0.000632036	0.265455	0.238095	0.000161937		0	182.813	0	0		0	0.347763	0	0		0	135.445	0	0		0.181918	134.802	0.134953	64.6165		0	0.591352	0	0		0	0.354347	0	0		0	0.226549	0	0
	0	200.97	0	0		0	151.675	0	0		0	0.267959	0	0		0	184.538	0	0		0	0.351044	0	0		0	136.722	0	0		0	136.073	0	0		0	0.596931	0	0		0	0.357689	0	0		0.000325764	0.228687	0.14245	8.79104e-05
	0	202.848	0	0		0	153.093	0	0		0.00128792	0.270464	0.476191	0.000311554		0	186.263	0	0		0	0.354324	0	0		0	138	0	0		0	137.345	0	0		0	0.60251	0	0		0	0.361032	0	0		0	0.230824	0	0
	1.45196	204.726	0.70922	157.033		0	154.51	0	0		0	0.272968	0	0		2.55186	187.987	1.35747	304.375		0	0.357605	0	0		0	139.278	0	0		0	138.617	0	0		0	0.608088	0	0		0	0.364375	0	0		0	0.232961	0	0
	0	206.604	0	0		0	155.928	0	0		0	0.275472	0	0		0	189.712	0	0		0.000511895	0.360886	0.141844	0.000422991		0.816129	140.556	0.580645	116.805		0.377566	139.888	0.269906	123.294		0	0.613667	0	0		0	0.367718	0	0		0.000334898	0.235098	0.14245	8.3431e-05
	0	208.482	0	0		0	157.345	0	0		0.000220616	0.277977	0.0793651	4.89201e-05		0	191.437	0	0		0	0.364167	0	0		0	141.833	0	0		0	141.16	0	0		0	0.619246	0	0		0	0.371061	0	0		0	0.237236	0	0
	2.98384	210.361	1.41844	290.73		0	158.763	0	0		0	0.280481	0	0		2.84061	193.161	1.47059	307.346		0	0.367447	0	0		0	143.111	0	0		0	142.432	0	0		0	0.624825	0	0		0.000524375	0.374404	0.140056	0.000613753		0	0.239373	0	0
	0	212.239	0	0		0	160.18	0	0		0.000449183	0.282985	0.15873	9.39325e-05		0	194.886	0	0		0	0.370728	0	0		0	144.389	0	0		0	143.703	0	0		0	0.630404	0	0		0	0.377747	0	0		0.0010321	0.24151	0.427351	0.000237206
	0	214.117	0	0		0	161.598	0	0		0	0.285489	0	0		0	196.611	0	0		0	0.374009	0	0		0	145.667	0	0		0	144.975	0	0		0	0.635982	0	0		0	0.38109	0	0		0	0.243647	0	0
	0	215.995	0	0		0	163.015	0	0		0	0.287994	0	0		0	198.335	0	0		0	0.37729	0	0		0	146.945	0	0		0.197364	146.247	0.134953	58.0336		0	0.641561	0	0		0	0.384433	0	0		0.000700241	0.245785	0.2849	0.000152451
	1.42634	217.873	0.654664	120.47		0	164.433	0	0		0.000461108	0.290498	0.15873	8.82202e-05		2.26312	200.06	1.13122	214.395		0.000539817	0.380571	0.141844	0.000393046		0	148.222	0	0		0	147.519	0	0		0	0.64714	0	0		0	0.387775	0	0		0	0.247922	0	0
	0	219.752	0	0		0	165.85	0	0		0	0.293002	0	0		0	201.785	0	0		0	0.383852	0	0		1.92903	149.5	1.29032	227.862		0	148.79	0	0		0	0.652719	0	0		0.000547785	0.391118	0.140056	0.00058315		0	0.250059	0	0
	0	221.63	0	0		0	167.268	0	0		0.0016417	0.295507	0.555556	0.00029579		0	203.509	0	0		0.000549124	0.387132	0.141844	0.000383309		0	150.778	0	0		0	150.062	0	0		0	0.658298	0	0		0	0.394461	0	0		0.00107776	0.252196	0.427351	0.000216176
	1.21936	223.508	0.545554	92.2245		0	168.685	0	0		0	0.298011	0	0		2.08949	205.234	1.0181	178.724		0	0.390413	0	0		0	152.056	0	0		0.204229	151.334	0.134953	55.2214		0	0.663876	0	0		0	0.397804	0	0		0	0.254334	0	0
	0	225.386	0	0		0	170.103	0	0		0	0.300515	0	0		0	206.958	0	0		0	0.393694	0	0		0	153.333	0	0		0	152.605	0	0		0	0.669455	0	0		0	0.401147	0	0		0	0.256471	0	0
	0	227.264	0	0		0	171.52	0	0		0.00120246	0.303019	0.396825	0.000197744		0	208.683	0	0		0	0.396975	0	0		0	154.611	0	0		0	153.877	0	0		0	0.675034	0	0		0	0.40449	0	0		0.000368388	0.258608	0.14245	6.80087e-05
	2.87522	229.143	1.25477	194.13		0	172.938	0	0		0	0.305524	0	0		0	210.408	0	0		0	0.400255	0	0		0	155.889	0	0		0	155.149	0	0		0	0.680613	0	0		0.00114239	0.407833	0.280112	0.00110666		0	0.260746	0	0
	0	231.021	0	0		0	174.356	0	0		0.00195573	0.308028	0.634921	0.000302353		3.1196	212.132	1.47059	231.974		0	0.403536	0	0		0	157.167	0	0		0.211094	156.421	0.134953	52.479		0	0.686192	0	0		0	0.411176	0	0		0.00149791	0.262883	0.569801	0.000261495
	0	232.899	0	0		0	175.773	0	0		0	0.310532	0	0		0	213.857	0	0		0.000577046	0.406817	0.141844	0.000354829		1.84	158.445	1.16129	178.398		0	157.692	0	0		0	0.69177	0	0		0	0.414519	0	0		0	0.26502	0	0
	2.68976	234.777	1.14566	161.554		0	177.19	0	0		0.00149065	0.313037	0.476191	0.000216475		0	215.582	0	0		0	0.410098	0	0		0	159.722	0	0		0	158.964	0	0		0.00341838	0.697349	0.490196	0.0093022		0	0.417861	0	0		0	0.267157	0	0
	0	236.656	0	0		0	178.608	0	0		0	0.315541	0	0		4.17897	217.306	1.92308	278.872		0.000586353	0.413378	0.141844	0.00034558		0	161	0	0		0	160.236	0	0		0	0.702928	0	0		0	0.421204	0	0		0.00153444	0.269295	0.569801	0.000246076
	0	238.534	0	0		0	180.026	0	0		0	0.318045	0	0		0	219.031	0	0		0	0.416659	0	0		0	162.278	0	0		0	161.507	0	0		0	0.708507	0	0		0	0.424547	0	0		0	0.271432	0	0
	0	240.412	0	0		0	181.443	0	0		0.00330726	0.320549	1.03175	0.000436557		0	220.756	0	0		0	0.41994	0	0		0	163.556	0	0		1.09837	162.779	0.674764	245.746		0	0.714086	0	0		0	0.42789	0	0		0.0011691	0.273569	0.427351	0.000177043
	2.64365	242.29	1.09111	135.008		0	182.861	0	0		0	0.323054	0	0		0	222.48	0	0		0.000600313	0.423221	0.141844	0.000331935		0	164.833	0	0		0	164.051	0	0		0	0.719664	0	0		0	0.431233	0	0		0	0.275706	0	0
	0	244.168	0	0		0	184.278	0	0		0.00258379	0.325558	0.793651	0.000319659		5.07251	224.205	2.26244	291.571		0	0.426502	0	0		0	166.111	0	0		0	165.322	0	0		0	0.725243	0	0		0	0.434576	0	0		0	0.277844	0	0
	0	246.047	0	0		0	185.696	0	0		0	0.328062	0	0		0	225.93	0	0		0	0.429782	0	0		2.59183	167.389	1.54839	204.771		0	166.594	0	0		0	0.730822	0	0		0.000613332	0.437919	0.140056	0.000501628		0.00199417	0.279981	0.712251	0.000276774
	4.05769	247.925	1.63666	182.515		0	187.113	0	0		0	0.330567	0	0		0	227.654	0	0		0	0.433063	0	0		0	168.667	0	0		0.679619	167.866	0.404858	139.692		0	0.736401	0	0		0.000618013	0.441262	0.140056	0.000496039		0	0.282118	0	0
	0	249.803	0	0		0	188.531	0	0		0.00290776	0.333071	0.873016	0.000325791		5.44905	229.379	2.37557	278.879		0	0.436344	0	0		0	169.945	0	0		0	169.138	0	0		0	0.74198	0	0		0	0.444605	0	0		0	0.284255	0	0
	0	251.681	0	0		0	189.948	0	0		0	0.335575	0	0		0	231.104	0	0		0.000623581	0.439625	0.141844	0.000309805		0	171.222	0	0		0	170.409	0	0		0	0.747558	0	0		0	0.447947	0	0		0.000815934	0.286393	0.2849	0.000103625
	2.90494	253.56	1.14566	114.49		0	191.366	0	0		0.0016099	0.338079	0.476191	0.000168609		0	232.828	0	0		0	0.442906	0	0		0	172.5	0	0		0	171.681	0	0		0	0.753137	0	0		0	0.45129	0	0		0	0.28853	0	0
	0	255.438	0	0		0	192.783	0	0		0	0.340584	0	0		0	234.553	0	0		0	0.446186	0	0		0	173.778	0	0		0	172.953	0	0		0	0.758716	0	0		0.000636741	0.454633	0.140056	0.000473999		0.00165622	0.290667	0.569801	0.000198064
	0	257.316	0	0		0	194.201	0	0		0.00217834	0.343088	0.634921	0.000213003		5.07836	236.278	2.14932	221.212		0.000637542	0.449467	0.141844	0.000296894		0	175.056	0	0		0.235121	174.225	0.134953	43.4307		0	0.764295	0	0		0.000641423	0.457976	0.140056	0.000468567		0	0.292804	0	0
	5.23196	259.194	2.01855	179.621		0	195.618	0	0		0	0.345592	0	0		0	238.002	0	0		0	0.452748	0	0		2.5028	176.333	1.41935	159.644		0	175.496	0	0		0	0.769873	0	0		0	0.461319	0	0		0	0.294942	0	0
	0	261.072	0	0		0	197.036	0	0		0	0.348097	0	0		0	239.727	0	0		0	0.456029	0	0		0	177.611	0	0		0	176.768	0	0		0	0.775452	0	0		0	0.464662	0	0		0.00126957	0.297079	0.427351	0.000138506
	0	262.951	0	0		0	198.453	0	0		0.0030608	0.350601	0.873016	0.000269346		2.73135	241.452	1.13122	104.854		0.000651503	0.459309	0.141844	0.000284257		0	178.889	0	0		0	178.04	0	0		0	0.781031	0	0		0	0.468005	0	0		0	0.299216	0	0
	5.05674	264.829	1.90944	150.22		0.296105	199.871	0.148148	101.667		0	0.353105	0	0		0	243.176	0	0		0	0.46259	0	0		0	180.167	0	0		0.241986	179.311	0.134953	41.0026		0	0.78661	0	0		0	0.471348	0	0		0	0.301353	0	0
	0	266.707	0	0		0	201.288	0	0		0.00310453	0.35561	0.873016	0.000254204		0	244.901	0	0		0	0.465871	0	0		0	181.445	0	0		0	180.583	0	0		0	0.792189	0	0		0	0.474691	0	0		0.00172929	0.303491	0.569801	0.000171755
	0	268.585	0	0		0	202.706	0	0		0	0.358114	0	0		0	246.626	0	0		0	0.469152	0	0		0	182.722	0	0		0	181.855	0	0		0	0.797767	0	0		0	0.478034	0	0		0	0.305628	0	0
	0	270.464	0	0		0	204.124	0	0		0	0.360618	0	0		4.21409	248.35	1.69683	135.549		0	0.472433	0	0		0	184	0	0		0	183.126	0	0		0	0.803346	0	0		0	0.481376	0	0		0.00219206	0.307765	0.712251	0.000204252
	5.49735	272.342	2.01855	133.041		0	205.541	0	0		0.00317012	0.363122	0.873016	0.000232313		0	250.075	0	0		0.00202431	0.475713	0.425532	0.000791418		3.34695	185.278	1.80645	170.356		0.746551	184.398	0.404858	115.933		0	0.808925	0	0		0	0.484719	0	0		0	0.309903	0	0
	0	274.22	0	0		0	206.958	0	0		0	0.365627	0	0		0	251.799	0	0		0	0.478994	0	0		0	186.556	0	0		0	185.67	0	0		0	0.814504	0	0		0	0.488062	0	0		0	0.31204	0	0
	0	276.098	0	0		0	208.376	0	0		0.00496685	0.368131	1.34921	0.00033732		6.30943	253.524	2.48869	176.455		0	0.482275	0	0		0	187.833	0	0		0	186.942	0	0		0	0.820083	0	0		0	0.491405	0	0		0.004923	0.314177	1.56695	0.000415971
	5.91439	277.976	2.12766	121.442		0	209.794	0	0		0	0.370635	0	0		0	255.249	0	0		0	0.485556	0	0		0	189.111	0	0		0	188.213	0	0		0	0.825661	0	0		0	0.494748	0	0		0	0.316314	0	0
	0	279.855	0	0		0	211.211	0	0		0.00325757	0.37314	0.873016	0.000204657		0	256.974	0	0		0	0.488837	0	0		0	190.389	0	0		0	189.485	0	0		0	0.83124	0	0		0	0.498091	0	0		0.00226817	0.318451	0.712251	0.000179287
	0	281.733	0	0		0	212.629	0	0		0	0.375644	0	0		0	258.698	0	0		0	0.492117	0	0		0	191.667	0	0		0.514863	190.757	0.269906	71.5894		0	0.836819	0	0		0	0.501434	0	0		0	0.320589	0	0
	6.8079	283.611	2.40044	117.337		0	214.046	0	0		0	0.378148	0	0		5.30273	260.423	2.0362	121.685		0.00210808	0.495398	0.425532	0.000720818		0	192.945	0	0		0	192.029	0	0		0.0041294	0.842398	0.490196	0.00744639		0.00070697	0.504777	0.140056	0.000395809		0	0.322726	0	0
	0	285.489	0	0		0	215.464	0	0		0.00483368	0.380653	1.26984	0.000269186		0	262.147	0	0		0	0.498679	0	0		4.38567	194.222	2.25807	175.524		0	193.3	0	0		0	0.847977	0	0		0.000711652	0.508119	0.140056	0.000390847		0.0013883	0.324863	0.427351	9.90531e-05
	0	287.368	0	0		0	216.881	0	0		0	0.383157	0	0		0	263.872	0	0		0.002136	0.50196	0.425532	0.000698018		0	195.5	0	0		0	194.572	0	0		0	0.853555	0	0		0	0.511462	0	0		0	0.327001	0	0
	8.20555	289.246	2.83688	117.22		0	218.299	0	0		0.00367296	0.385661	0.952381	0.000188238		7.21077	265.597	2.71493	141.255		0	0.50524	0	0		0	196.778	0	0		1.05719	195.844	0.539811	134.374		0	0.859134	0	0		0.000721016	0.514805	0.140056	0.000381016		0	0.329138	0	0
	0	291.124	0	0		0	219.716	0	0		0	0.388165	0	0		0	267.321	0	0		0	0.508521	0	0		0	198.056	0	0		0	197.115	0	0		0	0.864713	0	0		0	0.518148	0	0		0.00235951	0.331275	0.712251	0.000151476
	0	293.002	0	0		0	221.134	0	0		0	0.39067	0	0		0	269.046	0	0		0.00145192	0.511802	0.283688	0.000443003		0	199.333	0	0		0	198.387	0	0		0	0.870292	0	0		0	0.521491	0	0		0	0.333412	0	0
	7.07842	294.88	2.40044	82.5595		0	222.551	0	0		0.00374451	0.393174	0.952381	0.000168658		0	270.771	0	0		0	0.515083	0	0		0	200.611	0	0		0	199.659	0	0		0	0.87587	0	0		0	0.524834	0	0		0.000477991	0.33555	0.14245	2.85452e-05
	0	296.759	0	0		0	223.969	0	0		0	0.395678	0	0		7.39806	272.495	2.71493	115.528		0	0.518363	0	0		0	201.889	0	0		0	200.93	0	0		0	0.881449	0	0		0	0.528177	0	0		0	0.337687	0	0
	0	298.637	0	0		0	225.386	0	0		0.00158009	0.398182	0.396825	6.50837e-05		0	274.22	0	0		0.00147984	0.521644	0.283688	0.00042121		4.84979	203.167	2.3871	149.815		1.36439	202.202	0.674764	154.702		0	0.887028	0	0		0	0.53152	0	0		0	0.339824	0	0
	0	300.515	0	0		0	226.804	0	0		0	0.400687	0	0		0	275.945	0	0		0	0.524925	0	0		0	204.445	0	0		0	203.474	0	0		0	0.892607	0	0		0	0.534863	0	0		0.000974249	0.341961	0.2849	5.20359e-05
	5.93899	302.393	1.96399	51.3505		0	228.221	0	0		0.00543988	0.403191	1.34921	0.000204315		6.59622	277.669	2.37557	85.6876		0	0.528206	0	0		0	205.722	0	0		0	204.746	0	0		0	0.898186	0	0		0.000753789	0.538206	0.140056	0.000347595		0	0.344099	0	0
	0	304.272	0	0		0.680412	229.639	0.296296	159.749		0	0.405695	0	0		0	279.394	0	0		0	0.531487	0	0		0	207	0	0		0	206.017	0	0		0	0.903764	0	0		0	0.541548	0	0		0.00345249	0.346236	0.997151	0.000170787
	0	306.15	0	0		0	231.056	0	0		0	0.4082	0	0		0	281.119	0	0		0	0.534767	0	0		0	208.278	0	0		1.67845	207.289	0.809717	173.379		0	0.909343	0	0		0.000763153	0.544891	0.140056	0.000338328		0	0.348373	0	0
	7.05793	308.028	2.29133	47.4328		0	232.474	0	0		0.00717102	0.410704	1.74603	0.000233108		0	282.843	0	0		0.00305276	0.538048	0.567376	0.000772222		0	209.556	0	0		0	208.561	0	0		0	0.914922	0	0		0.000767835	0.548234	0.140056	0.000333742		0	0.35051	0	0
	0	309.906	0	0		0	233.892	0	0		0	0.413208	0	0		5.15055	284.568	1.80995	51.1489		0	0.541329	0	0		0	210.833	0	0		0	209.833	0	0		0	0.920501	0	0		0	0.551577	0	0		0.00401878	0.352648	1.1396	0.000176528
	0	311.784	0	0		0	235.309	0	0		0.00725848	0.415713	1.74603	0.000213336		0	286.293	0	0		0	0.54461	0	0		7.11599	212.111	3.35484	165.691		0	211.104	0	0		0	0.92608	0	0		0	0.55492	0	0		0	0.354785	0	0
	9.06935	313.663	2.89143	45.9484		0	236.726	0	0		0	0.418217	0	0		0	288.017	0	0		0.0015543	0.547891	0.283688	0.000365784		0	213.389	0	0		0.859821	212.376	0.404858	80.7668		0	0.931658	0	0		0	0.558263	0	0		0	0.356922	0	0
	0	315.541	0	0		0	238.144	0	0		0	0.420721	0	0		3.60539	289.742	1.24434	28.653		0	0.551171	0	0		0	214.667	0	0		0	213.648	0	0		0	0.937237	0	0		0.000786563	0.561606	0.140056	0.000315708		0.00306888	0.359059	0.854701	0.000119106
	0	317.419	0	0		0	239.562	0	0		0.00470251	0.423225	1.11111	0.000117932		0	291.467	0	0		0.00235937	0.554452	0.425532	0.000528807		0	215.945	0	0		0	214.919	0	0		0	0.942816	0	0		0.000791245	0.564949	0.140056	0.000311278		0	0.361197	0	0
	7.14195	319.297	2.23677	26.2067		0	240.979	0	0		0	0.42573	0	0		0	293.191	0	0		0	0.557733	0	0		0	217.222	0	0		0	216.191	0	0		0	0.948395	0	0		0	0.568292	0	0		0.00465813	0.363334	1.28205	0.000165955
	0	321.175	0	0		0	242.397	0	0		0.00645749	0.428234	1.50794	0.000144867		0	294.916	0	0		0	0.561014	0	0		0	218.5	0	0		0	217.463	0	0		0	0.953974	0	0		0	0.571634	0	0		0	0.365471	0	0
	0	323.054	0	0		0	243.814	0	0		0	0.430738	0	0		6.71133	296.64	2.26244	38.1941		0.00320167	0.564294	0.567376	0.000666254		0	219.778	0	0		0.590376	218.734	0.269906	49.1057		0	0.959552	0	0		0	0.574977	0	0		0	0.367609	0	0
	0	324.932	0	0		0	245.232	0	0		0	0.433243	0	0		0	298.365	0	0		0	0.567575	0	0		7.55868	221.056	3.41935	128.625		0	220.006	0	0		0	0.965131	0	0		0.00161994	0.57832	0.280112	0.000587741		0.00421363	0.369746	1.1396	0.000131358
	8.91463	326.81	2.72777	19.4696		0	246.649	0	0		0.00345831	0.435747	0.793651	6.50054e-05		0	300.09	0	0		0	0.570856	0	0		0	222.333	0	0		0	221.278	0	0		0	0.97071	0	0		0.00162931	0.581663	0.280112	0.000579194		0	0.371883	0	0
	0	328.688	0	0		0.735012	248.067	0.296296	135.399		0	0.438251	0	0		5.80413	301.815	1.92308	24.8034		0.00325751	0.574137	0.567376	0.000628531		0	223.611	0	0		0	222.55	0	0		0	0.976289	0	0		0	0.585006	0	0		0	0.37402	0	0
	0	330.567	0	0		0	249.484	0	0		0.00804554	0.440756	1.8254	0.000133422		0	303.539	0	0		0	0.577418	0	0		0	224.889	0	0		2.11437	223.821	0.944669	159.151		0	0.981868	0	0		0.00164804	0.588349	0.280112	0.000562288		0.00535837	0.376157	1.4245	0.000145171
	9.43106	332.445	2.83688	12.608		0	250.902	0	0		0	0.44326	0	0		0	305.264	0	0		0	0.580698	0	0		0	226.167	0	0		0	225.093	0	0		0	0.987446	0	0		0	0.591692	0	0		0	0.378295	0	0
	0	334.323	0	0		0	252.319	0	0		0.00459915	0.445764	1.03175	6.68351e-05		0	306.988	0	0		0.00662672	0.583979	1.13475	0.00118382		0	227.445	0	0		0	226.365	0	0		0	0.993025	0	0		0.000833382	0.595035	0.140056	0.000272816		0.00487733	0.380432	1.28205	0.000119824
	0	336.201	0	0		0.751813	253.737	0.296296	128.311		0	0.448268	0	0		3.84145	308.713	1.24434	10.4756		0	0.58726	0	0		0	228.722	0	0		0	227.636	0	0		0	0.998604	0	0		0.00167613	0.598378	0.280112	0.000537397		0	0.382569	0	0
	7.37762	338.079	2.18221	5.20691		0	255.154	0	0		0	0.450773	0	0		0	310.438	0	0		0.00335059	0.590541	0.567376	0.000568103		7.71613	230	3.35484	92.0739		0	228.908	0	0		0	1.00418	0	0		0	0.60172	0	0		0	0.384707	0	0
	0	339.958	0	0		0	256.572	0	0		0.00683513	0.453277	1.50794	8.02969e-05		0	312.162	0	0		0	0.593822	0	0		0	231.278	0	0		2.48507	230.18	1.07962	164.503		0.00494981	1.00976	0.490196	0.00556138		0.000847428	0.605063	0.140056	0.000260558		0.00440848	0.386844	1.1396	9.28503e-05
	0	341.836	0	0		0	257.989	0	0		0	0.455781	0	0		5.32614	313.887	1.69683	9.64455		0	0.597102	0	0		0	232.556	0	0		0	231.452	0	0		0	1.01534	0	0		0	0.608406	0	0		0	0.388981	0	0
	6.56301	343.714	1.90944	1.83839		0	259.407	0	0		0.00909297	0.458286	1.98413	9.16481e-05		0	315.612	0	0		0.00170321	0.600383	0.283688	0.000266656		0	233.833	0	0		0	232.723	0	0		0	1.02092	0	0		0	0.611749	0	0		0.00222859	0.391118	0.569801	4.21323e-05
	0	345.592	0	0		0	260.824	0	0		0	0.46079	0	0		0	317.336	0	0		0	0.603664	0	0		0	235.111	0	0		0	233.995	0	0		0	1.0265	0	0		0.000861473	0.615092	0.140056	0.000248583		0	0.393256	0	0
	0	347.471	0	0		0	262.242	0	0		0	0.463294	0	0		0	319.061	0	0		0	0.606945	0	0		0	236.389	0	0		1.58749	235.267	0.674764	94.5148		0	1.03208	0	0		0	0.618435	0	0		0	0.395393	0	0
	10.1012	349.349	2.89143	0.504622		0	263.659	0	0		0.00739363	0.465798	1.5873	5.80049e-05		5.4432	320.786	1.69683	4.87058		0.0025967	0.610225	0.425532	0.000374715		9.96667	237.667	4.19355	83.871		0	236.538	0	0		0	1.03766	0	0		0	0.621778	0	0		0.00283141	0.39753	0.712251	4.51042e-05
	0	351.227	0	0		0.785413	265.077	0.296296	114.708		0	0.468303	0	0		0	322.51	0	0		0	0.613506	0	0		0	238.945	0	0		0	237.81	0	0		0	1.04323	0	0		0	0.625121	0	0		0	0.399667	0	0
	0	353.105	0	0		0	266.495	0	0		0.0085941	0.470807	1.8254	5.61099e-05		0	324.235	0	0		0.0034995	0.616787	0.567376	0.000477769		0	240.222	0	0		0	239.082	0	0		0	1.04881	0	0		0	0.628464	0	0		0	0.401805	0	0
	0	354.983	0	0		0	267.912	0	0		0	0.473311	0	0		5.89972	325.96	1.80995	2.50663		0	0.620068	0	0		0	241.5	0	0		1.62182	240.353	0.674764	86.5648		0	1.05439	0	0		0.000884883	0.631807	0.140056	0.000229249		0.00287708	0.403942	0.712251	3.81288e-05
	8.37155	356.862	2.34588	0.260962		0	269.33	0	0		0.00679736	0.475816	1.42857	3.63365e-05		0	327.684	0	0		0	0.623349	0	0		0	242.778	0	0		0	241.625	0	0		0	1.05997	0	0		0	0.635149	0	0		0	0.406079	0	0
	0	358.74	0	0		0	270.747	0	0		0	0.47832	0	0		0	329.409	0	0		0.00533302	0.626629	0.851064	0.000668864		0	244.056	0	0		0	242.897	0	0		0	1.06555	0	0		0.00447123	0.638492	0.70028	0.00110868		0.00465204	0.408216	1.1396	5.4086e-05
	0	360.618	0	0		0	272.165	0	0		0	0.480824	0	0		0	331.134	0	0		0	0.62991	0	0		0	245.333	0	0		0	244.169	0	0		0	1.07113	0	0		0	0.641835	0	0		0	0.410354	0	0
	8.89926	362.496	2.45499	1.97527		0	273.582	0	0		0.0065211	0.483328	1.34921	2.4855e-05		6.02459	332.858	1.80995	0.429201		0	0.633191	0	0		11.2964	246.611	4.58064	58.6319		0	245.44	0	0		0.00527798	1.07671	0.490196	0.00488427		0.00451805	0.645178	0.70028	0.00107173		0	0.412491	0	0
	0	364.375	0	0		0	275	0	0		0	0.485833	0	0		0	334.583	0	0		0.000902797	0.636472	0.141844	0.000103787		0	247.889	0	0		2.33061	246.712	0.944669	107.966		0	1.08229	0	0		0	0.648521	0	0		0.00649702	0.414628	1.56695	6.11696e-05
	0	366.253	0	0		0	276.417	0	0		0.0050384	0.488337	1.03175	1.48296e-05		0	336.308	0	0		0	0.639752	0	0		0	249.167	0	0		0	247.984	0	0		0	1.08787	0	0		0	0.651864	0	0		0	0.416765	0	0
	8.03341	368.131	2.18221	4.65454		0.823214	277.835	0.296296	100.315		0	0.490841	0	0		6.50062	338.032	1.92308	0.0017815		0.00364842	0.643033	0.567376	0.000395252		0	250.445	0	0		0	249.256	0	0		0	1.09344	0	0		0.000917656	0.655207	0.140056	0.000203497		0	0.418903	0	0
	0	370.009	0	0		0	279.252	0	0		0	0.493346	0	0		0	339.757	0	0		0	0.646314	0	0		0	251.722	0	0		0	250.527	0	0		0	1.09902	0	0		0	0.65855	0	0		0.00479817	0.42104	1.1396	3.58248e-05
	0	371.887	0	0		0	280.67	0	0		0.012593	0.49585	2.53968	2.34696e-05		0	341.482	0	0		0	0.649595	0	0		0	253	0	0		3.3981	251.799	1.34953	139.908		0	1.1046	0	0		0	0.661892	0	0		0	0.423177	0	0
	9.78765	373.766	2.61866	10.7268		0	282.087	0	0		0	0.498354	0	0		0	343.206	0	0		0.00463032	0.652876	0.70922	0.000457904		0	254.278	0	0		0	253.071	0	0		0	1.11018	0	0		0	0.665235	0	0		0.00908792	0.425314	2.13675	5.73196e-05
	0	375.644	0	0		0.420007	283.505	0.148148	47.1139		0.00954016	0.500858	1.90476	1.22799e-05		5.8529	344.931	1.69683	0.880363		0	0.656156	0	0		10.2222	255.556	4	28.7993		0	254.342	0	0		0	1.11576	0	0		0	0.668578	0	0		0	0.427452	0	0
	0	377.522	0	0		0	284.922	0	0		0	0.503363	0	0		0	346.656	0	0		0	0.659437	0	0		0	256.833	0	0		0	255.614	0	0		0	1.12134	0	0		0	0.671921	0	0		0	0.429589	0	0
	7.65838	379.4	2.01855	13.5134		0	286.34	0	0		0.0132489	0.505867	2.61905	1.08804e-05		0	348.38	0	0		0.00564015	0.662718	0.851064	0.000507741		0	258.111	0	0		0	256.886	0	0		0	1.12692	0	0		0	0.675264	0	0		0.00737994	0.431726	1.7094	3.52052e-05
	0	381.279	0	0		0	287.757	0	0		0	0.508371	0	0		5.54465	350.105	1.58371	2.42604		0	0.665999	0	0		0	259.389	0	0		4.87747	258.158	1.88934	172.171		0	1.1325	0	0		0	0.678607	0	0		0	0.433864	0	0
	0	383.157	0	0		0.428407	289.175	0.148148	44.1655		0	0.510876	0	0		0	351.829	0	0		0.0123413	0.66928	1.84397	0.00104179		0	260.667	0	0		0	259.429	0	0		0	1.13807	0	0		0.000955112	0.68195	0.140056	0.000175945		0.007453	0.436001	1.7094	2.88856e-05
	0	385.035	0	0		0	290.592	0	0		0.0114084	0.51338	2.22222	3.68041e-06		0	353.554	0	0		0	0.67256	0	0		0	261.945	0	0		0	260.701	0	0		0	1.14365	0	0		0	0.685293	0	0		0	0.438138	0	0
	9.70977	386.913	2.50955	27.9734		0	292.01	0	0		0	0.515884	0	0		0	355.279	0	0		0	0.675841	0	0		0	263.222	0	0		0	261.973	0	0		0	1.14923	0	0		0.00192895	0.688636	0.280112	0.000338739		0	0.440275	0	0
	0	388.791	0	0		0	293.428	0	0		0.00946265	0.518389	1.8254	1.12792e-06		5.25005	357.003	1.47059	5.46387		0.00963294	0.679122	1.41844	0.000736387		12.1158	264.5	4.58064	14.6573		6.3946	263.244	2.42915	198.4		0	1.15481	0	0		0	0.691979	0	0		0.00567195	0.442412	1.28205	1.5433e-05
	0	390.67	0	0		0	294.845	0	0		0	0.520893	0	0		0	358.728	0	0		0	0.682403	0	0		0	265.778	0	0		0	264.516	0	0		0	1.16039	0	0		0.00292152	0.695321	0.420168	0.000488759		0	0.44455	0	0
	10.4936	392.548	2.67321	40.7044		0.877815	296.263	0.296296	81.228		0	0.523397	0	0		0	360.453	0	0		0	0.685683	0	0		0	267.056	0	0		0	265.788	0	0		0	1.16597	0	0		0.00489261	0.698664	0.70028	0.000798708		0	0.446687	0	0
	0	394.426	0	0		0	297.68	0	0		0.00500859	0.525901	0.952381	1.15263e-09		4.50673	362.177	1.24434	7.43839		0.00293176	0.688964	0.425532	0.000202243		0	268.333	0	0		0	267.06	0	0		0	1.17155	0	0		0	0.702007	0	0		0.00895091	0.448824	1.9943	1.59537e-05
	0	396.304	0	0		0	299.098	0	0		0	0.528406	0	0		0	363.902	0	0		0	0.692245	0	0		0	269.611	0	0		2.17272	268.331	0.809717	58.8979		0	1.17712	0	0		0.000987885	0.70535	0.140056	0.000153479		0	0.450962	0	0
	8.90643	398.183	2.23677	44.6049		0	300.515	0	0		0.0109553	0.53091	2.06349	4.48256e-07		0	365.627	0	0		0.00493281	0.695526	0.70922	0.000317086		0	270.889	0	0		0	269.603	0	0		0	1.1827	0	0		0	0.708693	0	0		0.0064544	0.453099	1.4245	8.21137e-06
	0	400.061	0	0		1.34192	301.933	0.444444	113.64		0	0.533414	0	0		0	367.351	0	0		0	0.698806	0	0		0	272.167	0	0		0	270.875	0	0		0	1.18828	0	0		0.003989	0.712036	0.560224	0.00058937		0	0.455236	0	0
	0	401.939	0	0		0	303.35	0	0		0	0.535919	0	0		3.34005	369.076	0.904977	8.89322		0	0.702087	0	0		13.2312	273.445	4.83871	3.87044		0	272.146	0	0		0	1.19386	0	0		0.00100193	0.715379	0.140056	0.000144321		0	0.457373	0	0
	9.03246	403.817	2.23677	56.5716		0	304.768	0	0		0.00897372	0.538423	1.66667	2.46995e-06		0	370.801	0	0		0.00300157	0.705368	0.425532	0.000172952		0	274.722	0	0		0	273.418	0	0		0.00587961	1.19944	0.490196	0.00375702		0	0.718722	0	0		0.00589116	0.459511	1.28205	3.97008e-06
	0	405.695	0	0		0	306.185	0	0		0	0.540927	0	0		0	372.525	0	0		0	0.708649	0	0		0	276	0	0		4.07772	274.69	1.48448	92.4787		0	1.20502	0	0		0.00202259	0.722065	0.280112	0.000276744		0	0.461648	0	0
	0	407.574	0	0		0	307.603	0	0		0.0103511	0.543431	1.90476	5.6234e-06		4.65696	374.25	1.24434	16.5978		0	0.71193	0	0		0	277.278	0	0		0	275.962	0	0		0	1.2106	0	0		0	0.725407	0	0		0	0.463785	0	0
	0	409.452	0	0		0	309.02	0	0		0	0.545936	0	0		0	375.975	0	0		0.0060869	0.71521	0.851064	0.000312955		0	278.556	0	0		0	277.233	0	0		0	1.21618	0	0		0.00510329	0.72875	0.70028	0.00066274		0.00597336	0.465922	1.28205	1.60405e-06
	7.18089	411.33	1.74577	58.3309		0	310.438	0	0		0.00565851	0.54844	1.03175	5.08065e-06		0	377.699	0	0		0	0.718491	0	0		0	279.833	0	0		0	278.505	0	0		0	1.22176	0	0		0.00205068	0.732093	0.280112	0.000259366		0	0.46806	0	0
	0	413.208	0	0		0	311.855	0	0		0	0.550944	0	0		0	379.424	0	0		0	0.721772	0	0		0	281.111	0	0		6.79619	279.777	2.42915	132.452		0	1.22734	0	0		0	0.735436	0	0		0.00401878	0.470197	0.854701	4.08225e-07
	0	415.087	0	0		2.78465	313.273	0.888889	196.186		0	0.553449	0	0		7.32978	381.149	1.92308	36.2568		0.0102844	0.725053	1.41844	0.000469423		14.3927	282.389	5.09677	3.53303e-08		0	281.048	0	0		0	1.23291	0	0		0.0010347	0.738779	0.140056	0.000124047		0	0.472334	0	0
	10.009	416.965	2.40044	96.6036		0	314.69	0	0		0.0141194	0.555953	2.53968	2.24079e-05		0	382.873	0	0		0	0.728334	0	0		0	283.667	0	0		0	282.32	0	0		0	1.23849	0	0		0	0.742122	0	0		0	0.474471	0	0
	0	418.843	0	0		0	316.108	0	0		0	0.558457	0	0		0	384.598	0	0		0.00933976	0.731614	1.2766	0.000392553		0	284.945	0	0		0	283.592	0	0		0.00609839	1.24407	0.490196	0.00338372		0.00104407	0.745465	0.140056	0.000118536		0.00407358	0.476609	0.854701	2.13019e-09
	0	420.721	0	0		0	317.525	0	0		0.0111302	0.560962	1.98413	2.39076e-05		3.49613	386.323	0.904977	21.3705		0	0.734895	0	0		0	286.222	0	0		0	284.863	0	0		0	1.24965	0	0		0	0.748808	0	0		0	0.478746	0	0
	7.14707	422.599	1.69122	80.6891		0	318.943	0	0		0	0.563466	0	0		0	388.047	0	0		0	0.738176	0	0		0	287.5	0	0		4.24762	286.135	1.48448	67.6027		0	1.25523	0	0		0.00421373	0.752151	0.560224	0.000452601		0.00959026	0.480883	1.9943	2.84241e-07
	0	424.478	0	0		1.42382	320.361	0.444444	88.9565		0	0.56597	0	0		0	389.772	0	0		0.014724	0.741457	1.98582	0.000544014		0	288.778	0	0		0	287.407	0	0		0	1.26081	0	0		0.00211623	0.755493	0.280112	0.000221009		0	0.48302	0	0
	0	426.356	0	0		0	321.778	0	0		0.0117304	0.568474	2.06349	3.67912e-05		0	391.497	0	0		0	0.744738	0	0		0	290.056	0	0		0	288.679	0	0		0	1.26639	0	0		0	0.758836	0	0		0	0.485158	0	0
	6.30787	428.234	1.473	82.2112		0	323.195	0	0		0	0.570979	0	0		5.78266	393.221	1.47059	45.2868		0	0.748018	0	0		10.9015	291.333	3.74194	2.99419		0	289.95	0	0		0.0124702	1.27197	0.980392	0.00632065		0.00213496	0.762179	0.280112	0.000210613		0.00902398	0.487295	1.85185	1.92175e-06
	0	430.112	0	0		0	324.613	0	0		0.00546174	0.573483	0.952381	2.12479e-05		0	394.946	0	0		0.00426269	0.751299	0.567376	0.000137497		0	292.611	0	0		6.28819	291.222	2.15924	84.0657		0	1.27754	0	0		0	0.765522	0	0		0	0.489432	0	0
	0	431.99	0	0		2.41504	326.031	0.740741	136.615		0	0.575987	0	0		0	396.671	0	0		0	0.75458	0	0		0	293.889	0	0		0	292.494	0	0		0.00628981	1.28312	0.490196	0.00307311		0.00538421	0.768865	0.70028	0.00050117		0	0.491569	0	0
	6.15417	433.869	1.41844	91.5587		0	327.448	0	0		0.00734592	0.578492	1.26984	3.46573e-05		3.15471	398.395	0.791855	29.1444		0.00859984	0.757861	1.13475	0.0002523		0	295.167	0	0		0	293.765	0	0		0	1.2887	0	0		0.00973371	0.772208	1.2605	0.000879702		0.00703286	0.493707	1.4245	3.92477e-06
	0	435.747	0	0		0	328.866	0	0		0	0.580996	0	0		0	400.12	0	0		0	0.761141	0	0		0	296.445	0	0		0	295.037	0	0		0	1.29428	0	0		0	0.775551	0	0		0	0.495844	0	0
	0	437.625	0	0		0	330.283	0	0		0	0.5835	0	0		0	401.844	0	0		0	0.764422	0	0		0	297.722	0	0		8.79729	296.309	2.96896	97.5118		0	1.29986	0	0		0.00218178	0.778894	0.280112	0.00018572		0.00709375	0.497981	1.4245	6.20646e-06
	0	439.503	0	0		1.47423	331.701	0.444444	75.2671		0.00930166	0.586005	1.5873	5.66776e-05		0	403.569	0	0		0.00871152	0.767703	1.13475	0.000220092		0	299	0	0		0	297.581	0	0		0	1.30544	0	0		0	0.782237	0	0		0	0.500119	0	0
	5.53834	441.382	1.25477	96.8502		0	333.118	0	0		0	0.588509	0	0		4.1263	405.294	1.0181	46.4778		0	0.770984	0	0		16.6606	300.278	5.54839	17.7572		0	298.852	0	0		0	1.31102	0	0		0.00440101	0.78558	0.560224	0.000352401		0	0.502256	0	0
	0	443.26	0	0		0	334.536	0	0		0.0121955	0.591013	2.06349	8.65501e-05		0	407.018	0	0		0	0.774265	0	0		0	301.556	0	0		0	300.124	0	0		0	1.31659	0	0		0.0033148	0.788922	0.420168	0.000257302		0.00934061	0.504393	1.85185	1.37866e-05
	0	445.138	0	0		0	335.953	0	0		0	0.593517	0	0		0	408.743	0	0		0.00661741	0.777545	0.851064	0.000142562		0	302.833	0	0		0	301.396	0	0		0	1.32217	0	0		0	0.792265	0	0		0	0.50653	0	0
	5.1213	447.016	1.14566	100.135		2.99885	337.371	0.888889	137.702		0	0.596022	0	0		1.85732	410.468	0.452489	23.9416		0	0.780826	0	0		0	304.111	0	0		3.26766	302.667	1.07962	28.0269		0	1.32775	0	0		0.00222859	0.795608	0.280112	0.000162391		0.00362299	0.508668	0.712251	7.09406e-06
	0	448.894	0	0		0	338.788	0	0		0.00997543	0.598526	1.66667	8.70652e-05		0	412.192	0	0		0.0100099	0.784107	1.2766	0.00019271		0	305.389	0	0		0	303.939	0	0		0	1.33333	0	0		0	0.798951	0	0		0	0.510805	0	0
	0	450.773	0	0		0	340.206	0	0		0	0.60103	0	0		0	413.917	0	0		0	0.787388	0	0		0	306.667	0	0		0	305.211	0	0		0.00656328	1.33891	0.490196	0.00265531		0.00337098	0.802294	0.420168	0.000230247		0	0.512942	0	0
	4.69196	452.651	1.03655	101.848		0	341.623	0	0		0.0110169	0.603534	1.8254	0.000109031		0	415.642	0	0		0	0.790668	0	0		0	307.945	0	0		0	306.483	0	0		0	1.34449	0	0		0.00225669	0.805637	0.280112	0.000149145		0.00807105	0.515079	1.56695	2.25927e-05
	0	454.529	0	0		0	343.041	0	0		0	0.606039	0	0		6.13774	417.366	1.47059	93.2686		0.00563084	0.793949	0.70922	9.05953e-05		15.3614	309.222	4.96774	35.7713		8.72178	307.754	2.83401	59.6135		0	1.35007	0	0		0	0.80898	0	0		0	0.517217	0	0
	0	456.407	0	0		5.10309	344.458	1.48148	204.11		0.0130402	0.608543	2.14286	0.00014512		0	419.091	0	0		0	0.79723	0	0		0	310.5	0	0		0	309.026	0	0		0	1.35565	0	0		0.00455083	0.812323	0.560224	0.000281255		0	0.519354	0	0
	4.75037	458.286	1.03655	113.756		0	345.876	0	0		0	0.611047	0	0		0	420.816	0	0		0	0.800511	0	0		0	311.778	0	0		0	310.298	0	0		0	1.36123	0	0		0	0.815666	0	0		0.00445719	0.521491	0.854701	1.68365e-05
	0	460.164	0	0		0	347.293	0	0		0	0.613552	0	0		2.38993	422.54	0.565611	40.6852		0.0136816	0.803792	1.70213	0.000181209		0	313.056	0	0		0	311.569	0	0		0.00670002	1.3668	0.490196	0.00245785		0.00344121	0.819008	0.420168	0.000198541		0	0.523628	0	0
	0	462.042	0	0		0	348.711	0	0		0.00684507	0.616056	1.11111	8.96138e-05		0	424.265	0	0		0	0.807072	0	0		0	314.333	0	0		0	312.841	0	0		0	1.37238	0	0		0.00575876	0.822351	0.70028	0.000320802		0.00599163	0.525766	1.1396	2.69808e-05
	4.55568	463.92	0.981997	119.674		5.18709	350.128	1.48148	184.866		0	0.61856	0	0		0	425.99	0	0		0.0103449	0.810353	1.2766	0.000119171		0	315.611	0	0		5.51075	314.113	1.75439	27.3804		0	1.37796	0	0		0	0.825694	0	0		0	0.527903	0	0
	0	465.798	0	0		0	351.546	0	0		0.00837944	0.621065	1.34921	0.000121293		0	427.714	0	0		0	0.813634	0	0		0	316.889	0	0		0	315.385	0	0		0	1.38354	0	0		0.0069667	0.829037	0.840336	0.000361288		0	0.53004	0	0
	0	467.677	0	0		0	352.964	0	0		0	0.623569	0	0		1.94316	429.439	0.452489	38.0584		0	0.816915	0	0		14.5741	318.167	4.58064	58.6373		0	316.656	0	0		0	1.38912	0	0		0	0.83238	0	0		0.00833896	0.532177	1.56695	4.75201e-05
	0	469.555	0	0		0	354.381	0	0		0	0.626073	0	0		0	431.164	0	0		0.0139608	0.820195	1.70213	0.000128171		0	319.445	0	0		0	317.928	0	0		0	1.3947	0	0		0.0058524	0.835723	0.70028	0.000281971		0	0.534315	0	0
	4.62946	471.433	0.981997	136.517		1.58133	355.798	0.444444	49.9728		0.00897967	0.628577	1.42857	0.000149586		0	432.888	0	0		0	0.823476	0	0		0	320.722	0	0		7.32307	319.2	2.2942	27.1779		0	1.40028	0	0		0.00470065	0.839066	0.560224	0.000218123		0	0.536452	0	0
	0	473.311	0	0		0	357.216	0	0		0	0.631082	0	0		3.93315	434.613	0.904977	84.9475		0	0.826757	0	0		0	322	0	0		0	320.471	0	0		0	1.40586	0	0		0	0.842409	0	0		0.0130428	0.538589	2.42165	9.15368e-05
	0	475.19	0	0		0	358.634	0	0		0.00804553	0.633586	1.26984	0.000146301		0	436.337	0	0		0.0117736	0.830038	1.41844	8.39536e-05		0	323.278	0	0		0	321.743	0	0		0	1.41143	0	0		0.0047381	0.845752	0.560224	0.000203592		0	0.540726	0	0
	2.86293	477.068	0.600109	91.5914		0	360.051	0	0		0	0.63609	0	0		0	438.062	0	0		0	0.833319	0	0		0	324.556	0	0		0	323.015	0	0		0.00694614	1.41701	0.490196	0.00212165		0	0.849094	0	0		0.00927972	0.542864	1.7094	7.39115e-05
	0	478.946	0	0		3.74856	361.469	1.03704	104.466		0.00608185	0.638595	0.952381	0.000120204		0	439.787	0	0		0.0130533	0.836599	1.56028	7.72682e-05		0	325.834	0	0		0	324.286	0	0		0	1.42259	0	0		0.00238778	0.852437	0.280112	9.47812e-05		0	0.545001	0	0
	0	480.824	0	0		0	362.886	0	0		0	0.641099	0	0		1.99779	441.512	0.452489	48.7377		0	0.83988	0	0		14.5617	327.111	4.45161	89.0389		7.46895	325.558	2.2942	18.0638		0	1.42817	0	0		0.00599286	0.85578	0.70028	0.000228419		0	0.547138	0	0
	2.37006	482.702	0.490998	81.9302		0	364.304	0	0		0	0.643603	0	0		0	443.236	0	0		0	0.843161	0	0		0	328.389	0	0		0	326.83	0	0		0	1.43375	0	0		0	0.859123	0	0		0.00704199	0.549275	1.28205	6.67711e-05
	0	484.581	0	0		0	365.721	0	0		0.00564062	0.646107	0.873016	0.000125417		0	444.961	0	0		0.00480251	0.846442	0.567376	2.07875e-05		0	329.667	0	0		0	328.102	0	0		0.00705553	1.43933	0.490196	0.00198015		0.00724761	0.862466	0.840336	0.000254184		0	0.551413	0	0
	0	486.459	0	0		0	367.139	0	0		0	0.648612	0	0		1.5159	446.685	0.339367	40.2887		0	0.849723	0	0		0	330.945	0	0		0	329.373	0	0		0	1.44491	0	0		0	0.865809	0	0		0.0102509	0.55355	1.85185	0.000108211
	2.13131	488.337	0.436443	79.3188		2.73005	368.556	0.740741	64.4521		0.00671786	0.651116	1.03175	0.000160867		0	448.41	0	0		0	0.853003	0	0		0	332.222	0	0		10.2629	330.645	3.10391	16.3814		0	1.45049	0	0		0.0036519	0.869152	0.420168	0.000117509		0	0.555687	0	0
	0	490.215	0	0		0	369.974	0	0		0	0.65362	0	0		0	450.135	0	0		0.0170042	0.856284	1.98582	5.10192e-05		0	333.5	0	0		0	331.917	0	0		0	1.45606	0	0		0.00855387	0.872495	0.980392	0.000263335		0	0.557824	0	0
	0	492.094	0	0		0	371.391	0	0		0	0.656125	0	0		0	451.859	0	0		0	0.859565	0	0		13.8231	334.778	4.12903	113.329		0	333.188	0	0		0	1.46164	0	0		0	0.875838	0	0		0.00717899	0.559962	1.28205	8.80096e-05
	0	493.972	0	0		0	372.809	0	0		0.00313633	0.658629	0.476191	8.34493e-05		3.07863	453.584	0.678733	91.104		0	0.862846	0	0		0	336.056	0	0		0	334.46	0	0		0.00719227	1.46722	0.490196	0.00181016		0.00246269	0.87918	0.280112	6.92252e-05		0	0.562099	0	0
	2.70513	495.85	0.545554	110.507		6.0985	374.226	1.62963	125.08		0	0.661133	0	0		0	455.309	0	0		0.0196568	0.866126	2.2695	3.78618e-05		0	337.333	0	0		8.60851	335.732	2.5641	8.20314		0	1.4728	0	0		0	0.882523	0	0		0	0.564236	0	0
	0	497.728	0	0		0	375.644	0	0		0.00737375	0.663638	1.11111	0.000209728		0	457.033	0	0		0	0.869407	0	0		0	338.611	0	0		0	337.004	0	0		0.00724696	1.47838	0.490196	0.0017443		0.00620354	0.885866	0.70028	0.000158655		0.012102	0.566373	2.13675	0.000170264
	0	499.606	0	0		0	377.061	0	0		0	0.666142	0	0		4.15166	458.758	0.904977	132.564		0.0272328	0.872688	3.12057	3.66769e-05		0	339.889	0	0		0	338.275	0	0		0	1.48396	0	0		0.00996313	0.889209	1.12045	0.000242698		0	0.568511	0	0
	1.09435	501.485	0.218222	47.7722		0	378.479	0	0		0	0.668646	0	0		0	460.483	0	0		0	0.875969	0	0		0	341.167	0	0		0	339.547	0	0		0	1.48954	0	0		0	0.892552	0	0		0.0113804	0.570648	1.9943	0.000174496
	0	503.363	0	0		6.1909	379.897	1.62963	109.414		0.00532659	0.67115	0.793651	0.000166638		0	462.207	0	0		0	0.87925	0	0		0	342.445	0	0		0	340.819	0	0		0.00732901	1.49512	0.490196	0.00164779		0.0125475	0.895895	1.40056	0.000276436		0	0.572785	0	0
	0	505.241	0	0		0	381.314	0	0		0	0.673655	0	0		0	463.932	0	0		0.0100145	0.88253	1.13475	6.77846e-06		11.3096	343.722	3.29032	123.778		11.5415	342.091	3.37382	4.48345		0.0147127	1.50069	0.980392	0.00323247		0	0.899238	0	0		0	0.574923	0	0
	1.3833	507.119	0.272777	64.3502		0	382.731	0	0		0.00697624	0.676159	1.03175	0.000231863		1.58028	465.657	0.339367	55.5399		0	0.885811	0	0		0	345	0	0		0	343.362	0	0		0	1.50627	0	0		0.00126412	0.902581	0.140056	2.50752e-05		0.0073982	0.57706	1.28205	0.000128082
	0	508.997	0	0		0	384.149	0	0		0	0.678663	0	0		0	467.381	0	0		0	0.889092	0	0		0	346.278	0	0		0	344.634	0	0		0	1.51185	0	0		0.0088816	0.905924	0.980392	0.000166865		0	0.579197	0	0
	0	510.876	0	0		0	385.567	0	0		0.00486548	0.681168	0.714286	0.000171426		0	469.106	0	0		0.0126578	0.892373	1.41844	3.02287e-06		0	347.556	0	0		0	345.906	0	0		0.00743839	1.51743	0.490196	0.00152339		0	0.909267	0	0		0	0.581334	0	0
	1.67841	512.754	0.327332	82.9899		6.30641	386.984	1.62963	91.3041		0	0.683672	0	0		4.79353	470.831	1.0181	180.37		0	0.895653	0	0		0	348.834	0	0		7.49641	347.177	2.15924	0.895787		0	1.52301	0	0		0.00255633	0.912609	0.280112	4.29145e-05		0.00914272	0.583472	1.56695	0.000177273
	0	514.632	0	0		0	388.402	0	0		0	0.686176	0	0		0	472.555	0	0		0.015301	0.898934	1.70213	1.09943e-06		0	350.111	0	0		0	348.449	0	0		0	1.52859	0	0		0	0.915952	0	0		0	0.585609	0	0
	0	516.51	0	0		0	389.819	0	0		0.003826	0.68868	0.555556	0.000146577		0	474.28	0	0		0	0.902215	0	0		0	351.389	0	0		0	349.721	0	0		0.0150409	1.53417	0.980392	0.00286659		0.0128753	0.919295	1.40056	0.000192018		0.0075352	0.587746	1.28205	0.000156933
	1.13124	518.389	0.218222	59.3116		0	391.237	0	0		0	0.691185	0	0		0	476.005	0	0		0	0.905496	0	0		10.2387	352.667	2.90323	143.393		0	350.993	0	0		0	1.53975	0	0		0.00646105	0.922638	0.70028	9.06052e-05		0	0.589883	0	0
	0	520.267	0	0		6.98052	392.654	1.77778	85.0857		0.00330328	0.693689	0.476191	0.000133505		1.62125	477.729	0.339367	66.5171		0.00773427	0.908777	0.851064	2.7744e-08		0	353.945	0	0		0	352.264	0	0		0	1.54533	0	0		0	0.925981	0	0		0	0.592021	0	0
	0	522.145	0	0		0	394.072	0	0		0	0.696193	0	0		0	479.454	0	0		0	0.912057	0	0		0	355.222	0	0		9.54213	353.536	2.69905	0.00018314		0	1.5509	0	0		0.0117142	0.929324	1.2605	0.000144481		0.00677103	0.594158	1.1396	0.000156133
	0	524.023	0	0		0	395.489	0	0		0	0.698698	0	0		0	481.179	0	0		0	0.915338	0	0		0	356.5	0	0		0	354.808	0	0		0	1.55648	0	0		0	0.932667	0	0		0	0.596295	0	0
	1.72145	525.901	0.327332	97.2607		0	396.907	0	0		0.00500858	0.701202	0.714286	0.000218632		3.82389	482.903	0.791855	166.89		0.0195451	0.918619	2.12766	2.88664e-06		0	357.778	0	0		0	356.079	0	0		0	1.56206	0	0		0.00786563	0.93601	0.840336	8.46662e-05		0.00767221	0.598432	1.28205	0.000188713
	0	527.78	0	0		7.67143	398.324	1.92593	77.6859		0	0.703706	0	0		0	484.628	0	0		0	0.9219	0	0		0	359.056	0	0		0	357.351	0	0		0	1.56764	0	0		0.0065781	0.939353	0.70028	6.59339e-05		0	0.60057	0	0
	0	529.658	0	0		0	399.742	0	0		0.00616533	0.706211	0.873016	0.000282736		0	486.353	0	0		0.0131231	0.92518	1.41844	4.70326e-06		0	360.334	0	0		6.29163	358.623	1.75439	0.439373		0	1.57322	0	0		0	0.942695	0	0		0	0.602707	0	0
	2.89981	531.536	0.545554	172.872		0	401.159	0	0		0	0.708715	0	0		0	488.077	0	0		0	0.928461	0	0		6.99893	361.611	1.93548	121.477		0	359.894	0	0		0	1.5788	0	0		0.00132498	0.946038	0.140056	1.14322e-05		0.0017232	0.604844	0.2849	4.64859e-05
	0	533.414	0	0		0	402.577	0	0		0.0056446	0.711219	0.793651	0.000271538		2.2163	489.802	0.452489	104.645		0	0.931742	0	0		0	362.889	0	0		0	361.166	0	0		0	1.58438	0	0		0	0.949381	0	0		0	0.606981	0	0
	0	535.293	0	0		8.97765	403.994	2.22222	74.3469		0	0.713723	0	0		0	491.526	0	0		0.0185678	0.935023	1.98582	1.56263e-05		0	364.167	0	0		0	362.438	0	0		0.0077939	1.58996	0.490196	0.0011528		0.00800609	0.952724	0.840336	5.88168e-05		0	0.609119	0	0
	1.75833	537.171	0.327332	110.394		0	405.412	0	0		0	0.716228	0	0		0	493.251	0	0		0	0.938304	0	0		0	365.445	0	0		7.85338	363.71	2.15924	2.19886		0	1.59553	0	0		0.00803418	0.956067	0.840336	5.42103e-05		0.00870735	0.611256	1.4245	0.000256349
	0	539.049	0	0		0	406.829	0	0		0.00285211	0.718732	0.396825	0.000147022		3.91949	494.976	0.791855	195.801		0	0.941584	0	0		0	366.722	0	0		0	364.981	0	0		0	1.60111	0	0		0	0.95941	0	0		0	0.613393	0	0
	0	540.927	0	0		0	408.247	0	0		0	0.721236	0	0		0	496.7	0	0		0.0160828	0.944865	1.70213	2.4442e-05		0	368	0	0		0	366.253	0	0		0	1.60669	0	0		0.00943875	0.962753	0.980392	5.31545e-05		0.00438412	0.61553	0.712251	0.000136473
	0.888388	542.805	0.163666	58.6359		0	409.664	0	0		0.00172319	0.723741	0.238095	9.28639e-05		0	498.425	0	0		0	0.948146	0	0		0	369.278	0	0		0	367.525	0	0		0	1.61227	0	0		0	0.966096	0	0		0	0.617668	0	0
	0	544.684	0	0		8.52614	411.082	2.07407	53.4267		0	0.726245	0	0		0	500.15	0	0		0.0121459	0.951427	1.2766	2.52294e-05		5.02043	370.556	1.35484	105.319		0	368.796	0	0		0.00793064	1.61785	0.490196	0.001024		0.0095043	0.969438	0.980392	4.39399e-05		0	0.619805	0	0
	0	546.562	0	0		0	412.5	0	0		0	0.728749	0	0		2.27092	501.874	0.452489	121.919		0	0.954708	0	0		0	371.834	0	0		11.986	370.068	3.23887	8.76427		0.00795799	1.62343	0.490196	0.000999151		0	0.972781	0	0		0.0062017	0.621942	0.997151	0.000209172
	1.49602	548.44	0.272777	103.632		0	413.917	0	0		0.00232144	0.731253	0.31746	0.000133418		0	503.599	0	0		0	0.957988	0	0		0	373.111	0	0		0	371.34	0	0		0.00798533	1.62901	0.490196	0.000974614		0.0150383	0.976124	1.54062	5.59457e-05		0	0.62408	0	0
	0	550.318	0	0		0	415.335	0	0		0	0.733758	0	0		0	505.324	0	0		0.019089	0.961269	1.98582	5.85473e-05		0	374.389	0	0		0	372.611	0	0		0.00801268	1.63459	0.490196	0.000950378		0.00823082	0.979467	0.840336	2.72241e-05		0.00624433	0.626217	0.997151	0.000221701
	0	552.197	0	0		8.02634	416.752	1.92593	39.1449		0.00409035	0.736262	0.555556	0.00024503		5.16226	507.048	1.0181	291.883		0	0.96455	0	0		0	375.667	0	0		0	373.883	0	0		0	1.64017	0	0		0	0.98281	0	0		0	0.628354	0	0
	0	554.075	0	0		0	418.17	0	0		0	0.738766	0	0		0	508.773	0	0		0	0.967831	0	0		0	376.945	0	0		7.59423	375.155	2.02429	9.38929		0	1.64574	0	0		0.00690583	0.986153	0.70028	1.76701e-05		0	0.630491	0	0
	1.21321	555.953	0.218222	89.4195		0	419.587	0	0		0.00117662	0.741271	0.15873	7.33876e-05		0	510.498	0	0		0.0123972	0.971111	1.2766	5.25189e-05		0	378.222	0	0		0	376.427	0	0		0	1.65132	0	0		0	0.989496	0	0		0.0090118	0.632629	1.4245	0.000344539
	0	557.831	0	0		0	421.005	0	0		0	0.743775	0	0		0	512.222	0	0		0	0.974392	0	0		6.61065	379.5	1.74194	164.277		0	377.698	0	0		0	1.6569	0	0		0.0139053	0.992839	1.40056	2.65589e-05		0	0.634766	0	0
	0	559.709	0	0		10.6388	422.422	2.51852	39.1232		0	0.746279	0	0		2.90694	513.947	0.565611	175.64		0	0.977673	0	0		0	380.778	0	0		0	378.97	0	0		0.00814941	1.66248	0.490196	0.000833779		0.0125569	0.996182	1.2605	2.03739e-05		0	0.636903	0	0
	0.612753	561.588	0.109111	47.2335		0	423.84	0	0		0.00118855	0.748784	0.15873	7.86055e-05		0	515.672	0	0		0.0306113	0.980954	3.12057	0.000170802		0	382.056	0	0		0	380.242	0	0		0	1.66806	0	0		0	0.999525	0	0		0.00819282	0.63904	1.28205	0.000336181
	0	563.466	0	0		0	425.257	0	0		0	0.751288	0	0		0	517.396	0	0		0	0.984235	0	0		0	383.334	0	0		7.72295	381.514	2.02429	15.7519		0.00820411	1.67364	0.490196	0.000789274		0.00842745	1.00287	0.840336	9.44098e-06		0	0.641178	0	0
	0	565.344	0	0		0	426.675	0	0		0.0011965	0.753792	0.15873	8.21837e-05		2.34896	519.121	0.452489	148.884		0.0182095	0.987515	1.84397	0.000119625		0	384.611	0	0		0	382.785	0	0		0	1.67922	0	0		0	1.00621	0	0		0.00641482	0.643315	0.997151	0.00027546
	0.618901	567.222	0.109111	49.8265		10.7816	428.092	2.51852	28.6762		0	0.756296	0	0		0	520.846	0	0		0	0.990796	0	0		0	385.889	0	0		0	384.057	0	0		0.0082588	1.6848	0.490196	0.000745993		0.00989758	1.00955	0.980392	7.05855e-06		0	0.645452	0	0
	0	569.1	0	0		0	429.51	0	0		0	0.758801	0	0		0	522.57	0	0		0	0.994077	0	0		0	387.167	0	0		0	385.329	0	0		0.00828615	1.69037	0.490196	0.000724808		0.00851173	1.0129	0.840336	4.63653e-06		0	0.647589	0	0
	0	570.979	0	0		0	430.927	0	0		0.00060421	0.761305	0.0793651	4.38501e-05		0	524.295	0	0		0.0127322	0.997358	1.2766	0.000104294		6.76645	388.445	1.74194	195.932		9.3911	386.6	2.42915	26.4248		0	1.69595	0	0		0	1.01624	0	0		0.00185107	0.649727	0.2849	8.48923e-05
	1.2501	572.857	0.218222	104.977		0	432.345	0	0		0	0.763809	0	0		1.78513	526.02	0.339367	120.318		0	1.00064	0	0		0	389.722	0	0		0	387.872	0	0		0	1.70153	0	0		0.00713993	1.01958	0.70028	1.97725e-06		0	0.651864	0	0
	0	574.735	0	0		0	433.762	0	0		0.0042573	0.766313	0.555556	0.000320171		0	527.744	0	0		0	1.00392	0	0		0	391	0	0		0	389.144	0	0		0.00836819	1.70711	0.490196	0.000663085		0	1.02293	0	0		0	0.654001	0	0
	0	576.613	0	0		12.2495	435.18	2.81481	20.0001		0	0.768818	0	0		0	529.469	0	0		0.0114292	1.0072	1.13475	0.000113995		0	392.278	0	0		0	390.416	0	0		0.00839554	1.71269	0.490196	0.000643121		0.00143735	1.02627	0.140056	1.43361e-07		0.00654269	0.656138	0.997151	0.000319606
	0	578.492	0	0		0	436.597	0	0		0	0.771322	0	0		4.20628	531.194	0.791855	296.383		0	1.01048	0	0		0	393.556	0	0		10.0433	391.687	2.5641	37.1603		0	1.71827	0	0		0.0158624	1.02961	1.54062	7.07006e-07		0	0.658276	0	0
	0.949869	580.37	0.163666	84.2192		0	438.015	0	0		0.00245659	0.773826	0.31746	0.000194585		0	532.918	0	0		0.0143796	1.01376	1.41844	0.000161763		0	394.834	0	0		0	392.959	0	0		0.00845023	1.72385	0.490196	0.000604112		0	1.03295	0	0		0.00376304	0.660413	0.569801	0.000191457
	0	582.248	0	0		0	439.433	0	0		0	0.776331	0	0		0	534.643	0	0		0	1.01704	0	0		0	396.111	0	0		0	394.231	0	0		0	1.72943	0	0		0.00580558	1.0363	0.560224	4.46721e-11		0	0.66255	0	0
	0	584.126	0	0		9.79667	440.85	2.22222	9.7866		0.00309062	0.778835	0.396825	0.000253173		0	536.367	0	0		0	1.02032	0	0		5.89674	397.389	1.48387	196.245		0	395.502	0	0		0	1.735	0	0		0	1.03964	0	0		0	0.664687	0	0
	0.959091	586.004	0.163666	88.455		0	442.267	0	0		0	0.781339	0	0		1.2174	538.092	0.226244	90.8276		0.0101634	1.0236	0.992908	0.000135068		0	398.667	0	0		0	396.774	0	0		0.0170645	1.74058	0.980392	0.00109577		0.00876456	1.04298	0.840336	3.65685e-07		0.00474946	0.666825	0.712251	0.000256356
	0	587.883	0	0		0	443.685	0	0		0.00186629	0.783844	0.238095	0.000157988		0	539.817	0	0		0	1.02689	0	0		0	399.945	0	0		11.2806	398.046	2.83401	55.9378		0	1.74616	0	0		0.0117235	1.04632	1.12045	1.10698e-06		0	0.668962	0	0
	0	589.761	0	0		0	445.103	0	0		0	0.786348	0	0		0	541.542	0	0		0	1.03016	0	0		0	401.222	0	0		0	399.317	0	0		0.0171739	1.75174	0.980392	0.00102385		0	1.04967	0	0		0.00286795	0.671099	0.427351	0.000160823
	0.645542	591.639	0.109111	61.8633		15.8763	446.52	3.55556	8.34012		0	0.788852	0	0		3.07277	543.266	0.565611	238.948		0.011727	1.03345	1.13475	0.000181514		0	402.5	0	0		0	400.589	0	0		0.00861431	1.75732	0.490196	0.0004944		0.0103236	1.05301	0.980392	2.70994e-06		0	0.673236	0	0
	0	593.517	0	0		0	447.938	0	0		0	0.791357	0	0		0	544.991	0	0		0	1.03673	0	0		0	403.778	0	0		0	401.861	0	0		0.00864166	1.7629	0.490196	0.000477185		0	1.05635	0	0		0	0.675374	0	0
	0	595.396	0	0		0	449.355	0	0		0	0.793861	0	0		0	546.715	0	0		0.0206526	1.04001	1.98582	0.000351466		0	405.056	0	0		7.61654	403.133	1.88934	46.3205		0	1.76848	0	0		0.01781	1.0597	1.68067	9.13337e-06		0.00193023	0.677511	0.2849	0.00011442
	0	597.274	0	0		0	450.773	0	0		0.000632036	0.796365	0.0793651	5.79068e-05		0	548.44	0	0		0	1.04329	0	0		4.45656	406.334	1.09677	168.491		0	404.404	0	0		0.00869635	1.77406	0.490196	0.000443665		0.0178662	1.06304	1.68067	1.19398e-05		0	0.679648	0	0
	0	599.152	0	0		15.408	452.19	3.40741	3.17007		0	0.798869	0	0		1.86708	550.165	0.339367	153.154		0	1.04657	0	0		0	407.611	0	0		0	405.676	0	0		0	1.77964	0	0		0	1.06638	0	0		0	0.681786	0	0
	0	601.03	0	0		0	453.608	0	0		0	0.801374	0	0		0	551.889	0	0		0.0193589	1.04985	1.84397	0.000376436		0	408.889	0	0		0	406.948	0	0		0.00875105	1.78521	0.490196	0.000411365		0.0104875	1.06973	0.980392	1.08974e-05		0.00292275	0.683923	0.427351	0.000182788
	1.31568	602.908	0.218222	135.715		0	455.025	0	0		0.001276	0.803878	0.15873	0.000122346		0	553.614	0	0		0	1.05313	0	0		0	410.167	0	0		0	408.219	0	0		0.0175568	1.79079	0.980392	0.000791345		0	1.07307	0	0		0	0.68606	0	0
	0	604.787	0	0		0	456.443	0	0		0	0.806382	0	0		3.14106	555.339	0.565611	267.842		0	1.05641	0	0		0	411.445	0	0		10.4998	409.491	2.5641	80.0458		0.00880574	1.79637	0.490196	0.000380288		0.010553	1.07641	0.980392	1.57064e-05		0.000980338	0.688197	0.14245	6.34739e-05
	0	606.665	0	0		0	457.86	0	0		0.00128395	0.808887	0.15873	0.0001268		0	557.063	0	0		0.0165342	1.05969	1.56028	0.000363916		0	412.722	0	0		0	410.763	0	0		0	1.80195	0	0		0.00907356	1.07975	0.840336	1.58054e-05		0	0.690334	0	0
	0	608.543	0	0		16.3299	459.278	3.55556	0.232625		0	0.811391	0	0		0	558.788	0	0		0	1.06297	0	0		0	414	0	0		0	412.035	0	0		0	1.80753	0	0		0	1.0831	0	0		0	0.692472	0	0
	1.33207	610.421	0.218222	144.015		0	460.695	0	0		0.0012919	0.813895	0.15873	0.000131334		0	560.513	0	0		0.0136118	1.06625	1.2766	0.000323886		5.62635	415.278	1.35484	239.26		0	413.306	0	0		0	1.81311	0	0		0.0136946	1.08644	1.2605	3.15816e-05		0.00494736	0.694609	0.712251	0.000336942
	0	612.299	0	0		0	462.113	0	0		0	0.816399	0	0		0.636015	562.237	0.113122	57.0186		0	1.06953	0	0		0	416.556	0	0		6.15433	414.578	1.48448	55.1648		0.00891513	1.81869	0.490196	0.000321794		0	1.08978	0	0		0	0.696746	0	0
	0	614.178	0	0		0	463.53	0	0		0	0.818904	0	0		0	563.962	0	0		0	1.07282	0	0		0	417.834	0	0		0	415.85	0	0		0.00894248	1.82427	0.490196	0.000307933		0.0168409	1.09313	1.54062	4.96002e-05		0	0.698884	0	0
	1.68046	616.056	0.272777	188.003		21.3532	464.948	4.59259	0.444845		0.00195573	0.821408	0.238095	0.000207425		0	565.687	0	0		0.0213693	1.0761	1.98582	0.000568008		0	419.111	0	0		0	417.122	0	0		0	1.82984	0	0		0.00307134	1.09647	0.280112	1.01119e-05		0.00299582	0.701021	0.427351	0.000214261
	0	617.934	0	0		0	466.365	0	0		0	0.823912	0	0		1.9256	567.411	0.339367	179.031		0	1.07938	0	0		0	420.389	0	0		0	418.393	0	0		0	1.83542	0	0		0	1.09981	0	0		0	0.703158	0	0
	0	619.812	0	0		0	467.783	0	0		0.000655886	0.826417	0.0793651	7.15083e-05		0	569.136	0	0		0	1.08266	0	0		0	421.667	0	0		9.06159	419.665	2.15924	94.1896		0	1.841	0	0		0.0139053	1.10315	1.2605	5.6194e-05		0.00200939	0.705295	0.2849	0.000148346
	1.35666	621.691	0.218222	156.928		0	469.2	0	0		0	0.828921	0	0		0	570.861	0	0		0.0169437	1.08594	1.56028	0.000499751		2.72867	422.945	0.645161	127.459		0	420.937	0	0		0	1.84658	0	0		0	1.1065	0	0		0	0.707433	0	0
	0	623.569	0	0		16.0359	470.618	3.40741	2.62813		0	0.831425	0	0		0	572.585	0	0		0	1.08922	0	0		0	424.222	0	0		0	422.208	0	0		0	1.85216	0	0		0.00777199	1.10984	0.70028	3.77843e-05		0	0.70957	0	0
	0	625.447	0	0		0	472.036	0	0		0.00198555	0.833929	0.238095	0.000225398		3.24836	574.31	0.565611	316.578		0.00929787	1.0925	0.851064	0.000292945		0	425.5	0	0		0	423.48	0	0		0.00910656	1.85774	0.490196	0.000231175		0.0155908	1.11318	1.40056	8.26034e-05		0.00101383	0.711707	0.14245	7.83999e-05
	0.34224	627.325	0.0545554	40.8979		0	473.453	0	0		0	0.836434	0	0		0	576.035	0	0		0	1.09578	0	0		0	426.778	0	0		0	424.752	0	0		0	1.86332	0	0		0	1.11653	0	0		0	0.713844	0	0
	0	629.203	0	0		0	474.871	0	0		0.00399494	0.838938	0.476191	0.000465592		0	577.759	0	0		0	1.09906	0	0		0	428.056	0	0		4.59944	426.023	1.07962	56.5992		0	1.8689	0	0		0.00627378	1.11987	0.560224	3.9045e-05		0.00713942	0.715982	0.997151	0.000568981
	0	631.082	0	0		14.8179	476.288	3.11111	6.49829		0	0.841442	0	0		1.31105	579.484	0.226244	132.231		0.00781803	1.10234	0.70922	0.000270711		0	429.334	0	0		0	427.295	0	0		0	1.87447	0	0		0	1.12321	0	0		0	0.718119	0	0
	1.38125	632.96	0.218222	170.394		0	477.706	0	0		0.000669799	0.843947	0.0793651	8.01044e-05		0	581.208	0	0		0	1.10562	0	0		0	430.611	0	0		0	428.567	0	0		0	1.88005	0	0		0.00946684	1.12655	0.840336	6.83227e-05		0	0.720256	0	0
	0	634.838	0	0		0	479.123	0	0		0	0.846451	0	0		0	582.933	0	0		0	1.1089	0	0		1.67183	431.889	0.387097	86.5182		0	429.839	0	0		0	1.88563	0	0		0.0142424	1.1299	1.2605	0.000110224		0.0020581	0.722393	0.2849	0.00017141
	0	636.716	0	0		0	480.541	0	0		0	0.848955	0	0		0	584.658	0	0		0.0173532	1.11218	1.56028	0.000657079		0	433.167	0	0		5.81795	431.11	1.34953	81.0393		0.0185413	1.89121	0.980392	0.000330803		0	1.13324	0	0		0	0.724531	0	0
	0	638.595	0	0		0	481.958	0	0		0.00135152	0.851459	0.15873	0.000167876		1.98999	586.383	0.339367	209.827		0	1.11547	0	0		0	434.445	0	0		0	432.382	0	0		0.00929799	1.89679	0.490196	0.000155507		0.0159185	1.13658	1.40056	0.00014061		0	0.726668	0	0
	0.349412	640.473	0.0545554	44.9199		17.9028	483.376	3.7037	17.1842		0	0.853964	0	0		0	588.107	0	0		0	1.11875	0	0		0	435.722	0	0		0	433.654	0	0		0.00932533	1.90237	0.490196	0.000145919		0	1.13993	0	0		0.00207637	0.728805	0.2849	0.000180489
	0	642.351	0	0		0	484.793	0	0		0	0.856468	0	0		0	589.832	0	0		0.0175068	1.12203	1.56028	0.000721617		0	437	0	0		0	434.925	0	0		0.028058	1.90795	1.47059	0.000409905		0.0112085	1.14327	0.980392	0.000112001		0	0.730942	0	0
	0	644.229	0	0		0	486.211	0	0		0	0.858972	0	0		2.00754	591.556	0.339367	218.65		0	1.12531	0	0		0	438.278	0	0		0	436.197	0	0		0	1.91353	0	0		0.0080295	1.14661	0.70028	8.50835e-05		0.00104427	0.73308	0.14245	9.33355e-05
	1.40995	646.107	0.218222	186.806		0	487.628	0	0		0	0.861477	0	0		0	593.281	0	0		0.00800418	1.12859	0.70922	0.00034833		0	439.556	0	0		6.49414	437.469	1.48448	104.372		0	1.91911	0	0		0	1.14996	0	0		0	0.735217	0	0
	0	647.986	0	0		18.8373	489.046	3.85185	28.5188		0.000685699	0.863981	0.0793651	9.05259e-05		0	595.006	0	0		0	1.13187	0	0		1.42204	440.834	0.322581	80.9836		0	438.741	0	0		0.00943473	1.92468	0.490196	0.000110613		0.0129221	1.1533	1.12045	0.000153149		0	0.737354	0	0
	0	649.864	0	0		0	490.463	0	0		0	0.866485	0	0		0	596.73	0	0		0	1.13515	0	0		0	442.111	0	0		0	440.012	0	0		0.0189241	1.93026	0.980392	0.000205102		0	1.15664	0	0		0.00526703	0.739491	0.712251	0.00049035
	0	651.742	0	0		0	491.881	0	0		0	0.86899	0	0		5.41588	598.455	0.904977	615.191		0.00807398	1.13843	0.70922	0.000379955		0	443.389	0	0		0	441.284	0	0		0.00948942	1.93584	0.490196	9.47923e-05		0.00974776	1.15998	0.840336	0.000128373		0	0.741629	0	0
	0	653.62	0	0		0	493.298	0	0		0	0.871494	0	0		0	600.18	0	0		0	1.14171	0	0		0	444.667	0	0		5.97241	442.556	1.34953	106.746		0.0190335	1.94142	0.980392	0.000174678		0.0114052	1.16333	0.980392	0.00015798		0	0.743766	0	0
	0	655.499	0	0		22.7203	494.716	4.59259	49.651		0	0.873998	0	0		0	601.904	0	0		0	1.14499	0	0		0	445.945	0	0		0	443.827	0	0		0.0190882	1.947	0.980392	0.000160381		0	1.16667	0	0		0.00212508	0.745903	0.2849	0.000205843
	0.717269	657.377	0.109111	100.737		0	496.133	0	0		0.000695637	0.876502	0.0793651	9.73629e-05		2.73135	603.629	0.452489	319.925		0.0179163	1.14827	1.56028	0.000908508		0	447.222	0	0		0	445.099	0	0		0.00957146	1.95258	0.490196	7.33474e-05		0.00655469	1.17001	0.560224	0.000100034		0	0.74804	0	0
	0	659.255	0	0		0	497.551	0	0		0	0.879007	0	0		0	605.354	0	0		0	1.15155	0	0		0	448.5	0	0		0	446.371	0	0		0	1.95816	0	0		0	1.17335	0	0		0.00213726	0.750178	0.2849	0.000212442
	0	661.133	0	0		0	498.969	0	0		0.00139922	0.881511	0.15873	0.000200335		0	607.078	0	0		0.00982838	1.15484	0.851064	0.000522864		1.74108	449.778	0.387097	108.462		2.41642	447.643	0.539811	47.7224		0.00962615	1.96374	0.490196	6.05776e-05		0.00988822	1.1767	0.840336	0.000165442		0	0.752315	0	0
	0	663.011	0	0		13.3436	500.386	2.66667	39.6301		0	0.884015	0	0		0	608.803	0	0		0	1.15812	0	0		0	451.056	0	0		0	448.914	0	0		0.0096535	1.96931	0.490196	5.46498e-05		0	1.18004	0	0		0	0.754452	0	0
	0.725466	664.89	0.109111	105.78		0	501.803	0	0		0	0.88652	0	0		1.38128	610.528	0.226244	168.37		0	1.1614	0	0		0	452.334	0	0		0	450.186	0	0		0	1.97489	0	0		0.0049722	1.18338	0.420168	9.07925e-05		0	0.75659	0	0
	0	666.768	0	0		0	503.221	0	0		0	0.889024	0	0		0	612.252	0	0		0.0115642	1.16468	0.992908	0.000659418		0	453.611	0	0		0	451.458	0	0		0	1.98047	0	0		0.019945	1.18673	1.68067	0.000379876		0	0.758727	0	0
	0	668.646	0	0		0	504.639	0	0		0	0.891528	0	0		0	613.977	0	0		0	1.16796	0	0		0	454.889	0	0		0	452.729	0	0		0.00973554	1.98605	0.490196	3.86983e-05		0	1.19007	0	0		0.00325156	0.760864	0.427351	0.000344092
	0	670.524	0	0		0	506.056	0	0		0.00070955	0.894032	0.0793651	0.000107353		2.08948	615.702	0.339367	262.226		0	1.17124	0	0		0	456.167	0	0		7.35224	454.001	1.61943	163.186		0	1.99163	0	0		0.015043	1.19341	1.2605	0.000310807		0	0.763001	0	0
	0	672.403	0	0		14.2844	507.474	2.81481	58.6276		0	0.896537	0	0		0	617.426	0	0		0.00666394	1.17452	0.567376	0.000406141		0	457.445	0	0		0	455.273	0	0		0	1.99721	0	0		0	1.19676	0	0		0	0.765139	0	0
	0	674.281	0	0		0	508.891	0	0		0	0.899041	0	0		0	619.151	0	0		0	1.1778	0	0		2.3676	458.722	0.516129	160.484		0	456.545	0	0		0.00981758	2.00279	0.490196	2.54921e-05		0.0151273	1.2001	1.2605	0.000337838		0.00327896	0.767276	0.427351	0.000359818
	1.10664	676.159	0.163666	170.363		0	510.309	0	0		0	0.901545	0	0		0	620.876	0	0		0.0150776	1.18108	1.2766	0.000959186		0	460	0	0		0	457.816	0	0		0.00984493	2.00837	0.490196	2.17004e-05		0.00674197	1.20344	0.560224	0.000156345		0	0.769413	0	0
	0	678.037	0	0		0	511.726	0	0		0	0.90405	0	0		2.1129	622.6	0.339367	275.403		0	1.18436	0	0		0	461.278	0	0		2.47821	459.088	0.539811	60.0478		0	2.01394	0	0		0	1.20678	0	0		0	0.77155	0	0
	0	679.915	0	0		12.9236	513.144	2.51852	66.3004		0.000719487	0.906554	0.0793651	0.000114787		0	624.325	0	0		0	1.18764	0	0		0	462.556	0	0		0	460.36	0	0		0	2.01952	0	0		0.0101691	1.21013	0.840336	0.000253665		0.00110212	0.773688	0.14245	0.000125298
	0.371955	681.794	0.0545554	58.7885		0	514.561	0	0		0	0.909058	0	0		0	626.05	0	0		0.0101355	1.19092	0.851064	0.000686206		0	463.834	0	0		0	461.631	0	0		0.00992697	2.0251	0.490196	1.21565e-05		0	1.21347	0	0		0	0.775825	0	0
	0	683.672	0	0		0	515.979	0	0		0	0.911563	0	0		2.13046	627.774	0.339367	285.498		0	1.1942	0	0		0	465.111	0	0		0	462.903	0	0		0.0497716	2.03068	2.45098	4.79262e-05		0.00340844	1.21681	0.280112	9.11871e-05		0	0.777962	0	0
	0	685.55	0	0		0	517.396	0	0		0	0.914067	0	0		0	629.499	0	0		0	1.19748	0	0		0	466.389	0	0		0	464.175	0	0		0.0199633	2.03626	0.980392	1.46391e-05		0.0051267	1.22016	0.420168	0.000141896		0	0.780099	0	0
	0.750059	687.428	0.109111	121.648		16.1409	518.814	3.11111	101.003		0	0.916571	0	0		0	631.223	0	0		0.00510964	1.20077	0.425532	0.0003673		0.603441	467.667	0.129032	44.2944		5.6532	465.447	1.21457	151.889		0	2.04184	0	0		0	1.2235	0	0		0	0.782237	0	0
	0	689.307	0	0		0	520.231	0	0		0	0.919075	0	0		0	632.948	0	0		0	1.20405	0	0		0	468.945	0	0		0	466.718	0	0		0.0301091	2.04742	1.47059	1.11082e-05		0.0137461	1.22684	1.12045	0.000406424		0.00111734	0.784374	0.14245	0.000134491
	0	691.185	0	0		0	521.649	0	0		0	0.92158	0	0		2.15387	634.673	0.339367	299.241		0.00856261	1.20733	0.70922	0.000639818		0	470.222	0	0		0	467.99	0	0		0.0100637	2.053	0.490196	2.35205e-06		0	1.23018	0	0		0	0.786511	0	0
	0	693.063	0	0		0	523.066	0	0		0	0.924084	0	0		0	636.397	0	0		0	1.21061	0	0		0	471.5	0	0		0	469.262	0	0		0.0403642	2.05857	1.96078	5.22609e-06		0.00345526	1.23353	0.280112	0.000108865		0.00224686	0.788648	0.2849	0.000276517
	0.758256	694.941	0.109111	127.184		12.4322	524.484	2.37037	93.0324		0	0.926588	0	0		0	638.122	0	0		0	1.21389	0	0		0	472.778	0	0		3.80999	470.533	0.809717	110.681		0.0303552	2.06415	1.47059	1.69874e-06		0.00692924	1.23687	0.560224	0.000225177		0	0.790786	0	0
	0	696.819	0	0		0	525.901	0	0		0	0.929093	0	0		0.723809	639.847	0.113122	103.253		0.00517945	1.21717	0.425532	0.000409461		0	474.056	0	0		0	471.805	0	0		0	2.06973	0	0		0	1.24021	0	0		0	0.792923	0	0
	0	698.698	0	0		0	527.319	0	0		0	0.931597	0	0		0	641.571	0	0		0	1.22045	0	0		0	475.334	0	0		0	473.077	0	0		0.0305193	2.07531	1.47059	2.47485e-09		0.0104501	1.24356	0.840336	0.00036067		0	0.79506	0	0
	0.764404	700.576	0.109111	131.417		0	528.736	0	0		0	0.934101	0	0		0	643.296	0	0		0	1.22373	0	0		0.307491	476.611	0.0645161	24.3372		0	474.349	0	0		0	2.08089	0	0		0	1.2469	0	0		0	0.797197	0	0
	0	702.454	0	0		0	530.154	0	0		0.000743338	0.936605	0.0793651	0.000133645		0	645.021	0	0		0.00174044	1.22701	0.141844	0.000145285		0	477.889	0	0		3.85118	475.62	0.809717	120.522		0.0306834	2.08647	1.47059	1.968e-06		0.00875519	1.25024	0.70028	0.000320268		0	0.799335	0	0
	0	704.332	0	0		7.87513	531.572	1.48148	72.046		0	0.93911	0	0		2.92645	646.745	0.452489	432.09		0	1.23029	0	0		0	479.167	0	0		0	476.892	0	0		0	2.09205	0	0		0.0087786	1.25358	0.70028	0.000330359		0.0011417	0.801472	0.14245	0.000149875
	0.385276	706.211	0.0545554	67.8593		0	532.989	0	0		0.000747313	0.941614	0.0793651	0.000136927		0	648.47	0	0		0	1.23357	0	0		0	480.445	0	0		0	478.164	0	0		0.0102825	2.09763	0.490196	2.53155e-06		0	1.25693	0	0		0	0.803609	0	0
	0	708.089	0	0		0	534.407	0	0		0	0.944118	0	0		0	650.195	0	0		0.00701762	1.23686	0.567376	0.000617438		0	481.722	0	0		0	479.435	0	0		0.0309295	2.1032	1.47059	1.17813e-05		0.0105905	1.26027	0.840336	0.000421213		0.00114779	0.805747	0.14245	0.000153851
	0	709.967	0	0		0	535.824	0	0		0	0.946623	0	0		2.94986	651.919	0.452489	446.68		0	1.24013	0	0		0	483	0	0		0	480.707	0	0		0.0310115	2.10878	1.47059	1.68834e-05		0	1.26361	0	0		0	0.807884	0	0
	0.38835	711.845	0.0545554	70.0449		10.3469	537.242	1.92593	109.509		0	0.949127	0	0		0	653.644	0	0		0.00176371	1.24342	0.141844	0.000160561		0	484.278	0	0		3.25222	481.979	0.674764	111.177		0	2.11436	0	0		0.0106467	1.26696	0.840336	0.000446747		0	0.810021	0	0
	0	713.723	0	0		0	538.659	0	0		0	0.951631	0	0		0	655.369	0	0		0	1.2467	0	0		0.313262	485.556	0.0645161	26.6304		0	483.25	0	0		0	2.11994	0	0		0.00889565	1.2703	0.70028	0.000383163		0.00115692	0.812158	0.14245	0.000159913
	0	715.602	0	0		0	540.077	0	0		0	0.954136	0	0		0	657.093	0	0		0	1.24998	0	0		0	486.834	0	0		0	484.522	0	0		0.0104192	2.12552	0.490196	1.25603e-05		0	1.27364	0	0		0	0.814295	0	0
	0.391424	717.48	0.0545554	72.2652		0	541.494	0	0		0	0.95664	0	0		2.23581	658.818	0.339367	349.883		0.00533302	1.25326	0.425532	0.000510278		0	488.111	0	0		0	485.794	0	0		0	2.1311	0	0		0.010731	1.27699	0.840336	0.000486456		0	0.816433	0	0
	0	719.358	0	0		12.0647	542.912	2.22222	146.074		0.000761225	0.959144	0.0793651	0.000148729		0	660.543	0	0		0	1.25654	0	0		0	489.389	0	0		4.60116	487.066	0.944669	168.229		0	2.13668	0	0		0	1.28033	0	0		0.00233211	0.81857	0.2849	0.000332183
	0	721.236	0	0		0	544.329	0	0		0	0.961648	0	0		0	662.267	0	0		0	1.25982	0	0		0	490.667	0	0		0	488.337	0	0		0.0210025	2.14226	0.980392	4.44777e-05		0.0107871	1.28367	0.840336	0.000513863		0	0.820707	0	0
	0	723.114	0	0		0	545.747	0	0		0	0.964153	0	0		0	663.992	0	0		0.00358326	1.2631	0.283688	0.000359797		0	491.945	0	0		0	489.609	0	0		0	2.14784	0	0		0.00721016	1.28701	0.560224	0.000351901		0	0.822845	0	0
	0.791045	724.993	0.109111	150.559		0	547.164	0	0		0	0.966657	0	0		0	665.717	0	0		0	1.26638	0	0		0	493.222	0	0		0	490.881	0	0		0.0211119	2.15341	0.980392	6.04346e-05		0	1.29036	0	0		0	0.824982	0	0
	0	726.871	0	0		0	548.582	0	0		0	0.969161	0	0		0	667.441	0	0		0.00180094	1.26966	0.141844	0.000186588		0.957097	494.5	0.193548	87.0804		0	492.152	0	0		0	2.15899	0	0		0.00362381	1.2937	0.280112	0.000185463		0	0.827119	0	0
	0	728.749	0	0		4.88888	549.999	0.888889	69.092		0	0.971665	0	0		0	669.166	0	0		0	1.27294	0	0		0	495.778	0	0		7.99067	493.424	1.61943	316.529		0.0106106	2.16457	0.490196	3.94163e-05		0	1.29704	0	0		0	0.829256	0	0
	0	730.627	0	0		0	551.417	0	0		0	0.97417	0	0		3.0357	670.891	0.452489	502.251		0	1.27622	0	0		0	497.056	0	0		0	494.696	0	0		0	2.17015	0	0		0.0054638	1.30038	0.420168	0.00029284		0	0.831394	0	0
	0	732.506	0	0		0	552.834	0	0		0	0.976674	0	0		0	672.615	0	0		0.0036298	1.2795	0.283688	0.000393706		0	498.334	0	0		0	495.968	0	0		0.0213307	2.17573	0.980392	9.96699e-05		0.00912975	1.30373	0.70028	0.000500505		0	0.833531	0	0
	0	734.384	0	0		0	554.252	0	0		0	0.979178	0	0		0	674.34	0	0		0	1.28279	0	0		0	499.611	0	0		0	497.239	0	0		0	2.18131	0	0		0	1.30707	0	0		0	0.835668	0	0
	0.401671	736.262	0.0545554	79.9163		11.525	555.669	2.07407	182.618		0	0.981683	0	0		1.52956	676.064	0.226244	258.986		0	1.28607	0	0		0	500.889	0	0		3.36377	498.511	0.674764	141.659		0.01072	2.18689	0.490196	6.14751e-05		0.00367063	1.31041	0.280112	0.000210339		0	0.837805	0	0
	0	738.14	0	0		0	557.087	0	0		0	0.984187	0	0		0	677.789	0	0		0.00365772	1.28935	0.283688	0.000414784		0	502.167	0	0		0	499.783	0	0		0.0429895	2.19247	1.96078	0.000271011		0	1.31376	0	0		0	0.839943	0	0
	0	740.018	0	0		0	558.505	0	0		0	0.986691	0	0		0	679.514	0	0		0	1.29263	0	0		0.324803	503.445	0.0645161	31.5264		0	501.054	0	0		0.0323242	2.19805	1.47059	0.000223007		0.00922338	1.3171	0.70028	0.000551822		0	0.84208	0	0
	0	741.897	0	0		0	559.922	0	0		0.00157015	0.989196	0.15873	0.000340189		0	681.239	0	0		0.00551451	1.29591	0.425532	0.000643714		0	504.722	0	0		0	502.326	0	0		0.0216041	2.20362	0.980392	0.000162445		0.00924679	1.32044	0.70028	0.000565043		0	0.844217	0	0
	0	743.775	0	0		4.98969	561.34	0.888889	88.0092		0	0.9917	0	0		0.772583	682.963	0.113122	134.827		0	1.29919	0	0		0	506	0	0		2.71848	503.598	0.539811	121.425		0.0216588	2.2092	0.980392	0.000176832		0	1.32378	0	0		0	0.846354	0	0
	0	745.653	0	0		0	562.757	0	0		0	0.994204	0	0		0	684.688	0	0		0	1.30247	0	0		0	507.278	0	0		0	504.87	0	0		0.0108568	2.21478	0.490196	9.59141e-05		0.00371745	1.32713	0.280112	0.000236782		0	0.848492	0	0
	0	747.531	0	0		0	564.175	0	0		0.000791038	0.996708	0.0793651	0.00017566		0	686.412	0	0		0.00185213	1.30575	0.141844	0.000225568		0	508.556	0	0		0	506.141	0	0		0.0108841	2.22036	0.490196	0.000103718		0	1.33047	0	0		0	0.850629	0	0
	0.408843	749.409	0.0545554	85.5011		0	565.592	0	0		0	0.999213	0	0		0.778436	688.137	0.113122	138.899		0	1.30903	0	0		0	509.834	0	0		0	507.413	0	0		0.0109115	2.22594	0.490196	0.000111825		0.00186809	1.33381	0.140056	0.000123899		0	0.852766	0	0
	0	751.288	0	0		1.68003	567.01	0.296296	32.7751		0	1.00172	0	0		0	689.862	0	0		0	1.31231	0	0		0	511.111	0	0		0	508.685	0	0		0.0109388	2.23152	0.490196	0.000120238		0.00749108	1.33716	0.560224	0.000506799		0	0.854903	0	0
	0	753.166	0	0		0	568.427	0	0		0	1.00422	0	0		0	691.586	0	0		0	1.31559	0	0		0.330574	512.389	0.0645161	34.1293		6.882	509.956	1.34953	329.846		0.0109662	2.2371	0.490196	0.000128957		0	1.3405	0	0		0.00122086	0.857041	0.14245	0.000205625
	0.823835	755.044	0.109111	175.905		0	569.845	0	0		0	1.00673	0	0		0	693.311	0	0		0	1.31887	0	0		0	513.667	0	0		0	511.228	0	0		0.021987	2.24268	0.980392	0.000275963		0.00376426	1.34384	0.280112	0.000264789		0	0.859178	0	0
	0	756.922	0	0		0	571.262	0	0		0.00160195	1.00923	0.15873	0.000370271		1.57248	695.036	0.226244	288.844		0.0018754	1.32215	0.141844	0.000244507		0	514.945	0	0		0	512.5	0	0		0.0220417	2.24825	0.980392	0.000294618		0	1.34719	0	0		0	0.861315	0	0
	0	758.801	0	0		0	572.68	0	0		0	1.01173	0	0		0	696.76	0	0		0	1.32544	0	0		0	516.222	0	0		0	513.772	0	0		0.0220964	2.25383	0.980392	0.000313886		0.00756598	1.35053	0.560224	0.000552861		0.00122999	0.863452	0.14245	0.000212624
	0	760.679	0	0		3.40206	574.097	0.592593	74.6825		0	1.01424	0	0		0	698.485	0	0		0	1.32872	0	0		0	517.5	0	0		1.39013	515.043	0.269906	70.3321		0.0110755	2.25941	0.490196	0.000166882		0.00379236	1.35387	0.280112	0.000282345		0	0.86559	0	0
	0	762.557	0	0		0	575.515	0	0		0	1.01674	0	0		1.58419	700.21	0.226244	297.269		0	1.332	0	0		0	518.778	0	0		0	516.315	0	0		0.0111029	2.26499	0.490196	0.000177127		0	1.35721	0	0		0	0.867727	0	0
	0	764.435	0	0		0	576.932	0	0		0	1.01925	0	0		0	701.934	0	0		0	1.33528	0	0		0	520.056	0	0		0	517.587	0	0		0.0111302	2.27057	0.490196	0.000187677		0	1.36056	0	0		0	0.869864	0	0
	0.418065	766.313	0.0545554	92.9587		0	578.35	0	0		0	1.02175	0	0		0	703.659	0	0		0	1.33856	0	0		0	521.333	0	0		0	518.858	0	0		0.0223152	2.27615	0.980392	0.000397063		0	1.3639	0	0		0	0.872001	0	0
	0	768.192	0	0		3.43566	579.767	0.592593	82.4172		0	1.02426	0	0		0	705.384	0	0		0.00570996	1.34184	0.425532	0.000804728		0	522.611	0	0		0	520.13	0	0		0	2.28173	0	0		0	1.36724	0	0		0	0.874139	0	0
	0	770.07	0	0		0	581.185	0	0		0	1.02676	0	0		3.19959	707.108	0.452489	617.384		0	1.34512	0	0		0	523.889	0	0		0.703646	521.402	0.134953	37.991		0	2.2873	0	0		0.00575877	1.37059	0.420168	0.000469286		0	0.876276	0	0
	0.421139	771.948	0.0545554	95.5138		0	582.602	0	0		0	1.02926	0	0		0	708.833	0	0		0	1.3484	0	0		0	525.167	0	0		0	522.674	0	0		0.0224793	2.29288	0.980392	0.00046585		0	1.37393	0	0		0	0.878413	0	0
	0	773.826	0	0		0	584.02	0	0		0	1.03177	0	0		0	710.558	0	0		0	1.35168	0	0		0	526.445	0	0		0	523.945	0	0		0	2.29846	0	0		0.00192895	1.37727	0.140056	0.000162749		0	0.880551	0	0
	0	775.705	0	0		4.33657	585.437	0.740741	113.166		0	1.03427	0	0		0.805749	712.282	0.113122	158.7		0	1.35496	0	0		0	527.722	0	0		0	525.217	0	0		0.0112943	2.30404	0.490196	0.000257379		0	1.38061	0	0		0	0.882688	0	0
	0	777.583	0	0		0	586.855	0	0		0	1.03678	0	0		0	714.007	0	0		0	1.35824	0	0		0.34129	529	0.0645161	39.2371		1.42102	526.489	0.269906	80.6591		0.0226433	2.30962	0.980392	0.000540129		0.00193831	1.38396	0.140056	0.000169196		0	0.884825	0	0
	0.850476	779.461	0.109111	197.949		0	588.273	0	0		0.000824826	1.03928	0.0793651	0.00020889		0	715.731	0	0		0	1.36152	0	0		0	530.278	0	0		0	527.76	0	0		0.011349	2.3152	0.490196	0.000283055		0	1.3873	0	0		0	0.886962	0	0
	0	781.339	0	0		0	589.69	0	0		0	1.04179	0	0		0	717.456	0	0		0	1.36481	0	0		0	531.556	0	0		0	529.032	0	0		0	2.32078	0	0		0.00389536	1.39064	0.280112	0.000351537		0	0.8891	0	0
	0	783.217	0	0		5.25429	591.108	0.888889	148.544		0	1.04429	0	0		0	719.181	0	0		0	1.36809	0	0		0	532.833	0	0		0	530.304	0	0		0.0342111	2.32636	1.47059	0.000929856		0.00976181	1.39399	0.70028	0.000895506		0	0.891237	0	0
	1.28494	785.096	0.163666	304.832		0	592.525	0	0		0	1.04679	0	0		0	720.905	0	0		0	1.37137	0	0		0	534.111	0	0		2.8695	531.576	0.539811	170.952		0.0228621	2.33194	0.980392	0.000647712		0	1.39733	0	0		0	0.893374	0	0
	0	786.974	0	0		0	593.943	0	0		0	1.0493	0	0		0	722.63	0	0		0	1.37465	0	0		0	535.389	0	0		0	532.847	0	0		0.0229168	2.33751	0.980392	0.000676134		0.00196173	1.40067	0.140056	0.000185861		0	0.895511	0	0
	0	788.852	0	0		0	595.36	0	0		0	1.0518	0	0		0.819406	724.355	0.113122	169.095		0	1.37793	0	0		0	536.667	0	0		0	534.119	0	0		0.0229715	2.34309	0.980392	0.000705167		0	1.40401	0	0		0	0.897649	0	0
	0	790.73	0	0		0	596.778	0	0		0	1.05431	0	0		0	726.08	0	0		0	1.38121	0	0		0.347061	537.945	0.0645161	42.1349		0	535.391	0	0		0.0115131	2.34867	0.490196	0.000367405		0	1.40736	0	0		0	0.899786	0	0
	0	792.609	0	0		0.886215	598.195	0.148148	27.5466		0.00083874	1.05681	0.0793651	0.00022341		0	727.804	0	0		0.00196382	1.38449	0.141844	0.000323439		0	539.222	0	0		0	536.662	0	0		0.0230809	2.35425	0.980392	0.000765064		0.00592731	1.4107	0.420168	0.000588704		0	0.901923	0	0
	0	794.487	0	0		0	599.613	0	0		0	1.05932	0	0		0	729.529	0	0		0	1.38777	0	0		0	540.5	0	0		3.62979	537.934	0.674764	229.233		0.0115678	2.35983	0.490196	0.000397964		0	1.41404	0	0		0	0.90406	0	0
	0.43446	796.365	0.0545554	106.986		0	601.03	0	0		0	1.06182	0	0		0	731.253	0	0		0	1.39105	0	0		0	541.778	0	0		0	539.206	0	0		0	2.36541	0	0		0.00198513	1.41739	0.140056	0.000203307		0	0.906198	0	0
	0	798.243	0	0		0	602.448	0	0		0	1.06432	0	0		0	732.978	0	0		0	1.39433	0	0		0	543.056	0	0		0	540.477	0	0		0	2.37099	0	0		0	1.42073	0	0		0	0.908335	0	0
	0	800.121	0	0		1.78923	603.865	0.296296	59.7701		0	1.06683	0	0		0	734.703	0	0		0	1.39761	0	0		0	544.334	0	0		0	541.749	0	0		0	2.37657	0	0		0.00997249	1.42407	0.70028	0.00105253		0	0.910472	0	0
	0.437534	802	0.0545554	109.726		0	605.283	0	0		0.000848677	1.06933	0.0793651	0.000234079		1.66613	736.427	0.226244	359.641		0	1.40089	0	0		0	545.611	0	0		1.46564	543.021	0.269906	96.8242		0.0116772	2.38214	0.490196	0.000462737		0	1.42742	0	0		0.00130001	0.912609	0.14245	0.000270173
	0	803.878	0	0		0	606.7	0	0		0	1.07184	0	0		0	738.152	0	0		0.00199174	1.40417	0.141844	0.000350655		0.352832	546.889	0.0645161	45.136		0	544.293	0	0		0.0117045	2.38772	0.490196	0.000479695		0	1.43076	0	0		0	0.914747	0	0
	0	805.756	0	0		0	608.118	0	0		0	1.07434	0	0		0	739.877	0	0		0	1.40745	0	0		0	548.167	0	0		0	545.564	0	0		0.0234637	2.3933	0.980392	0.000993915		0.00200854	1.4341	0.140056	0.000221537		0	0.916884	0	0
	0	807.634	0	0		1.80603	609.535	0.296296	64.6377		0	1.07685	0	0		0	741.601	0	0		0	1.41074	0	0		0	549.445	0	0		0	546.836	0	0		0.0117592	2.39888	0.490196	0.000514525		0	1.43744	0	0		0	0.919021	0	0
	0	809.513	0	0		0	610.953	0	0		0	1.07935	0	0		1.68173	743.326	0.226244	372.194		0	1.41402	0	0		0	550.722	0	0		0	548.108	0	0		0.0235731	2.40446	0.980392	0.0010648		0.00201791	1.44079	0.140056	0.000229047		0	0.921158	0	0
	0	811.391	0	0		0	612.37	0	0		0	1.08185	0	0		0	745.051	0	0		0	1.4173	0	0		0	552	0	0		0	549.38	0	0		0.0236278	2.41004	0.980392	0.00110115		0.00809036	1.44413	0.560224	0.0009314		0	0.923296	0	0
	0	813.269	0	0		0	613.788	0	0		0	1.08436	0	0		0	746.775	0	0		0	1.42058	0	0		0	553.278	0	0		0	550.651	0	0		0	2.41562	0	0		0	1.44747	0	0		0	0.925433	0	0
	0.444707	815.147	0.0545554	116.254		0.911415	615.206	0.148148	34.8479		0.00086259	1.08686	0.0793651	0.000249435		0.84672	748.5	0.113122	190.875		0	1.42386	0	0		0	554.556	0	0		0	551.923	0	0		0.0237372	2.4212	0.980392	0.00117569		0.00609586	1.45081	0.420168	0.000721647		0	0.92757	0	0
	0	817.025	0	0		0	616.623	0	0		0	1.08937	0	0		0	750.225	0	0		0	1.42714	0	0		0	555.834	0	0		0	553.195	0	0		0.0237919	2.42678	0.980392	0.00121388		0	1.45416	0	0		0	0.929707	0	0
	0	818.904	0	0		0	618.04	0	0		0	1.09187	0	0		0	751.949	0	0		0	1.43042	0	0		0	557.111	0	0		0.748268	554.466	0.134953	54.4399		0.0119233	2.43235	0.490196	0.000626337		0.00408264	1.4575	0.280112	0.000496746		0	0.931845	0	0
	0.447781	820.782	0.0545554	119.109		0	619.458	0	0		0	1.09438	0	0		0	753.674	0	0		0	1.4337	0	0		0	558.389	0	0		0	555.738	0	0		0.035852	2.43793	1.47059	0.00193812		0.002046	1.46084	0.140056	0.000252332		0	0.933982	0	0
	0	822.66	0	0		0	620.876	0	0		0	1.09688	0	0		0	755.399	0	0		0	1.43698	0	0		0	559.667	0	0		0	557.01	0	0		0	2.44351	0	0		0	1.46419	0	0		0	0.936119	0	0
	0	824.538	0	0		1.84383	622.293	0.296296	76.2862		0	1.09939	0	0		0	757.123	0	0		0	1.44026	0	0		0	560.945	0	0		0	558.281	0	0		0	2.44909	0	0		0	1.46753	0	0		0	0.938257	0	0
	0	826.417	0	0		0	623.711	0	0		0	1.10189	0	0		0	758.848	0	0		0	1.44354	0	0		0	562.222	0	0		0	559.553	0	0		0.0360981	2.45467	1.47059	0.00212094		0	1.47087	0	0		0	0.940394	0	0
	0	828.295	0	0		0	625.128	0	0		0	1.10439	0	0		1.72075	760.573	0.226244	404.52		0	1.44683	0	0		0	563.5	0	0		0.756849	560.825	0.134953	57.9414		0.01206	2.46025	0.490196	0.000727904		0	1.47422	0	0		0	0.942531	0	0
	0	830.173	0	0		0	626.546	0	0		0	1.1069	0	0		0	762.297	0	0		0	1.4501	0	0		0	564.778	0	0		0	562.097	0	0		0	2.46583	0	0		0	1.47756	0	0		0	0.944668	0	0
	0	832.051	0	0		1.86063	627.963	0.296296	81.7729		0	1.1094	0	0		0	764.022	0	0		0	1.45339	0	0		0	566.056	0	0		0	563.368	0	0		0	2.4714	0	0		0	1.4809	0	0		0	0.946806	0	0
	0	833.929	0	0		0	629.381	0	0		0	1.11191	0	0		0	765.747	0	0		0	1.45667	0	0		0	567.334	0	0		0	564.64	0	0		0	2.47698	0	0		0.00207877	1.48424	0.140056	0.000280921		0	0.948943	0	0
	0	835.808	0	0		0	630.798	0	0		0	1.11441	0	0		1.73636	767.471	0.226244	417.827		0	1.45995	0	0		0	568.611	0	0		1.52743	565.912	0.269906	121.642		0.0243389	2.48256	0.980392	0.0016293		0	1.48759	0	0		0	0.95108	0	0
	0	837.686	0	0		0	632.216	0	0		0.00088644	1.11692	0.0793651	0.000276894		0	769.196	0	0		0	1.46323	0	0		0	569.889	0	0		0	567.183	0	0		0.0121968	2.48814	0.490196	0.0008371		0	1.49093	0	0		0	0.953217	0	0
	0	839.564	0	0		0.938716	633.633	0.148148	43.725		0	1.11942	0	0		0	770.92	0	0		0	1.46651	0	0		0	571.167	0	0		0	568.455	0	0		0.0244482	2.49372	0.980392	0.0017197		0.00418564	1.49427	0.280112	0.000587284		0	0.955354	0	0
	0	841.442	0	0		0	635.051	0	0		0	1.12192	0	0		0	772.645	0	0		0	1.46979	0	0		0	572.445	0	0		0	569.727	0	0		0.0122515	2.4993	0.490196	0.000882911		0	1.49761	0	0		0	0.957492	0	0
	0	843.321	0	0		0	636.468	0	0		0	1.12443	0	0		0	774.37	0	0		0	1.47307	0	0		0.370143	573.722	0.0645161	54.7585		0.770579	570.999	0.134953	63.7709		0.0245576	2.50488	0.980392	0.00181255		0.00210218	1.50096	0.140056	0.00030228		0	0.959629	0	0
	0	845.199	0	0		0	637.886	0	0		0	1.12693	0	0		0	776.094	0	0		0	1.47635	0	0		0	575	0	0		0	572.27	0	0		0.0123062	2.51046	0.490196	0.000929947		0	1.5043	0	0		0	0.961766	0	0
	0	847.077	0	0		1.89423	639.303	0.296296	93.3179		0.000896378	1.12944	0.0793651	0.000288757		0	777.819	0	0		0	1.47963	0	0		0	576.278	0	0		0	573.542	0	0		0	2.51604	0	0		0	1.50764	0	0		0	0.963904	0	0
	0	848.955	0	0		0	640.721	0	0		0	1.13194	0	0		1.76367	779.544	0.226244	441.632		0	1.48291	0	0		0	577.556	0	0		0	574.814	0	0		0	2.52162	0	0		0	1.51099	0	0		0	0.966041	0	0
	0.464175	850.833	0.0545554	134.923		0	642.138	0	0		0	1.13444	0	0		0	781.268	0	0		0	1.48619	0	0		0	578.834	0	0		0	576.085	0	0		0.0371646	2.52719	1.47059	0.00300836		0	1.51433	0	0		0	0.968178	0	0
	0	852.712	0	0		0	643.556	0	0		0	1.13695	0	0		0	782.993	0	0		0	1.48948	0	0		0	580.111	0	0		1.55832	577.357	0.269906	135.112		0	2.53277	0	0		0	1.51767	0	0		0	0.970315	0	0
	0	854.59	0	0		0	644.973	0	0		0	1.13945	0	0		0	784.718	0	0		0	1.49276	0	0		0	581.389	0	0		0	578.629	0	0		0.0124429	2.53835	0.490196	0.00105287		0	1.52102	0	0		0	0.972453	0	0
	0.934499	856.468	0.109111	275.996		0.957616	646.391	0.148148	50.4602		0	1.14196	0	0		0	786.442	0	0		0	1.49604	0	0		0	582.667	0	0		0	579.901	0	0		0.0124702	2.54393	0.490196	0.00107837		0	1.52436	0	0		0	0.97459	0	0
	0	858.346	0	0		0	647.808	0	0		0	1.14446	0	0		0	788.167	0	0		0	1.49932	0	0		0	583.945	0	0		0	581.172	0	0		0.0249952	2.54951	0.980392	0.00220836		0.00213964	1.5277	0.140056	0.000338083		0	0.976727	0	0
	0	860.225	0	0		0	649.226	0	0		0.00091029	1.14697	0.0793651	0.000305785		0	789.892	0	0		0	1.5026	0	0		0	585.222	0	0		1.57205	582.444	0.269906	141.326		0	2.55509	0	0		0	1.53104	0	0		0	0.978864	0	0
	0	862.103	0	0		0	650.644	0	0		0	1.14947	0	0		0	791.616	0	0		0	1.50588	0	0		0	586.5	0	0		0	583.716	0	0		0	2.56067	0	0		0	1.53439	0	0		0	0.981002	0	0
	0.471348	863.981	0.0545554	142.152		2.89805	652.061	0.444444	160.825		0	1.15197	0	0		0	793.341	0	0		0	1.50916	0	0		0	587.778	0	0		0	584.987	0	0		0	2.56624	0	0		0	1.53773	0	0		0	0.983139	0	0
	0	865.859	0	0		0	653.479	0	0		0	1.15448	0	0		0	795.066	0	0		0	1.51244	0	0		0	589.056	0	0		0	586.259	0	0		0.012607	2.57182	0.490196	0.00121045		0	1.54107	0	0		0	0.985276	0	0
	0	867.737	0	0		0	654.896	0	0		0	1.15698	0	0		0	796.79	0	0		0	1.51572	0	0		0	590.333	0	0		0	587.531	0	0		0.0126343	2.5774	0.490196	0.00123778		0.00216305	1.54442	0.140056	0.000361478		0	0.987414	0	0
	0	869.616	0	0		0	656.314	0	0		0	1.15949	0	0		0	798.515	0	0		0	1.519	0	0		0	591.611	0	0		0.794606	588.803	0.134953	74.6446		0.0126617	2.58298	0.490196	0.00126542		0	1.54776	0	0		0	0.989551	0	0
	0	871.494	0	0		2.92325	657.731	0.444444	170.556		0	1.16199	0	0		0	800.24	0	0		0	1.52228	0	0		0	592.889	0	0		0	590.074	0	0		0	2.58856	0	0		0	1.5511	0	0		0	0.991688	0	0
	0	873.372	0	0		0	659.149	0	0		0	1.1645	0	0		0	801.964	0	0		0	1.52556	0	0		0	594.167	0	0		0	591.346	0	0		0	2.59414	0	0		0	1.55445	0	0		0	0.993825	0	0
	0	875.25	0	0		0	660.566	0	0		0	1.167	0	0		0.909151	803.689	0.113122	245.61		0	1.52884	0	0		0	595.445	0	0		0	592.618	0	0		0.0127437	2.59972	0.490196	0.00135016		0	1.55779	0	0		0	0.995962	0	0
	0	877.129	0	0		0	661.984	0	0		0	1.16951	0	0		0	805.414	0	0		0	1.53212	0	0		0	596.722	0	0		0	593.889	0	0		0.0127711	2.6053	0.490196	0.00137902		0	1.56113	0	0		0	0.9981	0	0
	0	879.007	0	0		0.982816	663.401	0.148148	60.1907		0.000930166	1.17201	0.0793651	0.000330957		0	807.138	0	0		0	1.53541	0	0		0	598	0	0		0	595.161	0	0		0.0127984	2.61088	0.490196	0.00140818		0	1.56447	0	0		0	1.00024	0	0
	0.961141	880.885	0.109111	303.445		0	664.819	0	0		0	1.17451	0	0		0	808.863	0	0		0	1.53869	0	0		0	599.278	0	0		0	596.433	0	0		0	2.61645	0	0		0	1.56782	0	0		0	1.00237	0	0
	0	882.763	0	0		0	666.236	0	0		0	1.17702	0	0		0	810.588	0	0		0	1.54197	0	0		0	600.556	0	0		0	597.705	0	0		0	2.62203	0	0		0	1.57116	0	0		0	1.00451	0	0
	0	884.641	0	0		0	667.654	0	0		0	1.17952	0	0		0	812.312	0	0		0	1.54525	0	0		0	601.834	0	0		0.808335	598.976	0.134953	81.2423		0	2.62761	0	0		0	1.5745	0	0		0	1.00665	0	0
	0	886.52	0	0		0	669.071	0	0		0	1.18203	0	0		0	814.037	0	0		0	1.54853	0	0		0	603.111	0	0		0	600.248	0	0		0	2.63319	0	0		0	1.57784	0	0		0	1.00879	0	0
	0	888.398	0	0		0.993317	670.489	0.148148	64.498		0	1.18453	0	0		0.922807	815.761	0.113122	258.502		0	1.55181	0	0		0	604.389	0	0		0	601.52	0	0		0	2.63877	0	0		0	1.58119	0	0		0	1.01092	0	0
	0	890.276	0	0		0	671.906	0	0		0	1.18704	0	0		0	817.486	0	0		0	1.55509	0	0		0	605.667	0	0		0	602.791	0	0		0	2.64435	0	0		0	1.58453	0	0		0.00144311	1.01306	0.14245	0.000409182
	0	892.154	0	0		0	673.324	0	0		0.00283224	1.18954	0.238095	0.00104751		0	819.211	0	0		0	1.55837	0	0		0	606.945	0	0		0	604.063	0	0		0	2.64993	0	0		0	1.58787	0	0		0	1.0152	0	0
	0.487743	894.032	0.0545554	159.382		0	674.741	0	0		0	1.19204	0	0		0.92866	820.936	0.113122	264.129		0	1.56165	0	0		0	608.222	0	0		0.816916	605.335	0.134953	85.5077		0.0130172	2.6555	0.490196	0.00165246		0	1.59122	0	0		0	1.01734	0	0
	0	895.911	0	0		1.00172	676.159	0.148148	68.0511		0	1.19455	0	0		0	822.66	0	0		0	1.56493	0	0		0	609.5	0	0		0	606.606	0	0		0.0130445	2.66108	0.490196	0.00168437		0	1.59456	0	0		0	1.01947	0	0
	0	897.789	0	0		0	677.577	0	0		0	1.19705	0	0		0	824.385	0	0		0	1.56821	0	0		0	610.778	0	0		0	607.878	0	0		0	2.66666	0	0		0	1.5979	0	0		0	1.02161	0	0
	0.490817	899.667	0.0545554	162.722		0	678.994	0	0		0	1.19956	0	0		0	826.109	0	0		0	1.5715	0	0		0	612.056	0	0		0	609.15	0	0		0	2.67224	0	0		0	1.60125	0	0		0	1.02375	0	0
	0	901.545	0	0		0	680.412	0	0		0	1.20206	0	0		0.936464	827.834	0.113122	271.724		0	1.57478	0	0		0	613.334	0	0		0.823781	610.422	0.134953	88.9986		0	2.67782	0	0		0	1.60459	0	0		0	1.02588	0	0
	0	903.423	0	0		1.01012	681.829	0.148148	71.6994		0	1.20457	0	0		0	829.559	0	0		0.00223838	1.57806	0.141844	0.000638802		0	614.611	0	0		0	611.693	0	0		0	2.6834	0	0		0	1.60793	0	0		0	1.02802	0	0
	0.493891	905.302	0.0545554	166.097		0	683.247	0	0		0	1.20707	0	0		0	831.283	0	0		0	1.58134	0	0		0	615.889	0	0		0	612.965	0	0		0	2.68898	0	0		0	1.61127	0	0		0	1.03016	0	0
	0	907.18	0	0		0	684.664	0	0		0	1.20957	0	0		0	833.008	0	0		0	1.58462	0	0		0	617.167	0	0		0	614.237	0	0		0	2.69456	0	0		0	1.61462	0	0		0	1.0323	0	0
	0	909.058	0	0		0	686.082	0	0		0.000961967	1.21208	0.0793651	0.000373302		0	834.733	0	0		0	1.5879	0	0		0	618.445	0	0		0	615.509	0	0		0	2.70014	0	0		0	1.61796	0	0		0	1.03443	0	0
	0.496965	910.936	0.0545554	169.507		0	687.499	0	0		0	1.21458	0	0		0	836.457	0	0		0	1.59118	0	0		0	619.722	0	0		0	616.78	0	0		0	2.70572	0	0		0	1.6213	0	0		0	1.03657	0	0
	0	912.815	0	0		0	688.917	0	0		0	1.21709	0	0		0	838.182	0	0		0	1.59446	0	0		0	621	0	0		0	618.052	0	0		0	2.71129	0	0		0	1.62464	0	0		0	1.03871	0	0
	0	914.693	0	0		0	690.334	0	0		0	1.21959	0	0		0	839.907	0	0		0.0022663	1.59774	0.141844	0.000676827		0	622.278	0	0		0	619.324	0	0		0	2.71687	0	0		0	1.62799	0	0		0	1.04085	0	0
	0	916.571	0	0		0	691.752	0	0		0	1.22209	0	0		0	841.631	0	0		0	1.60102	0	0		0	623.556	0	0		0	620.595	0	0		0	2.72245	0	0		0	1.63133	0	0		0	1.04298	0	0
	0	918.449	0	0		0	693.169	0	0		0	1.2246	0	0		0	843.356	0	0		0.00227561	1.6043	0.141844	0.000689745		0	624.834	0	0		0	621.867	0	0		0	2.72803	0	0		0	1.63467	0	0		0	1.04512	0	0
	0	920.327	0	0		1.02902	694.587	0.148148	80.2564		0	1.2271	0	0		0	845.081	0	0		0	1.60758	0	0		0.403943	626.111	0.0645161	76.223		0	623.139	0	0		0	2.73361	0	0		0	1.63802	0	0		0	1.04726	0	0
	0	922.206	0	0		0	696.004	0	0		0	1.22961	0	0		0	846.805	0	0		0	1.61086	0	0		0	627.389	0	0		0	624.41	0	0		0	2.73919	0	0		0	1.64136	0	0		0	1.04939	0	0
	0	924.084	0	0		0	697.422	0	0		0	1.23211	0	0		0	848.53	0	0		0	1.61414	0	0		0	628.667	0	0		0	625.682	0	0		0.0134547	2.74477	0.490196	0.00219961		0	1.6447	0	0		0	1.05153	0	0
	0	925.962	0	0		0	698.839	0	0		0	1.23462	0	0		0	850.255	0	0		0	1.61743	0	0		0	629.945	0	0		0	626.954	0	0		0	2.75034	0	0		0	1.64804	0	0		0	1.05367	0	0
	0	927.84	0	0		0	700.257	0	0		0	1.23712	0	0		0	851.979	0	0		0	1.62071	0	0		0	631.222	0	0		0	628.226	0	0		0	2.75592	0	0		0.00231287	1.65139	0.140056	0.000529731		0	1.05581	0	0
	0	929.719	0	0		0	701.674	0	0		0	1.23962	0	0		0	853.704	0	0		0	1.62399	0	0		0	632.5	0	0		0	629.497	0	0		0	2.7615	0	0		0	1.65473	0	0		0	1.05794	0	0
	0	931.597	0	0		0	703.092	0	0		0	1.24213	0	0		0	855.429	0	0		0	1.62727	0	0		0	633.778	0	0		0	630.769	0	0		0.0135641	2.76708	0.490196	0.0023486		0	1.65807	0	0		0	1.06008	0	0
	0	933.475	0	0		0	704.51	0	0		0	1.24463	0	0		0	857.153	0	0		0	1.63055	0	0		0	635.056	0	0		0	632.041	0	0		0	2.77266	0	0		0	1.66142	0	0		0	1.06222	0	0
	0	935.353	0	0		0	705.927	0	0		0	1.24714	0	0		0	858.878	0	0		0	1.63383	0	0		0	636.334	0	0		0	633.312	0	0		0	2.77824	0	0		0	1.66476	0	0		0	1.06435	0	0
	0	937.231	0	0		0	707.345	0	0		0	1.24964	0	0		0	860.602	0	0		0	1.63711	0	0		0	637.611	0	0		0	634.584	0	0		0	2.78382	0	0		0.00233628	1.6681	0.140056	0.000558918		0	1.06649	0	0
	0	939.11	0	0		0	708.762	0	0		0	1.25215	0	0		0	862.327	0	0		0	1.64039	0	0		0	638.889	0	0		0	635.856	0	0		0	2.7894	0	0		0	1.67145	0	0		0	1.06863	0	0
	0	940.988	0	0		0	710.18	0	0		0	1.25465	0	0		0	864.052	0	0		0	1.64367	0	0		0	640.167	0	0		0	637.128	0	0		0	2.79497	0	0		0	1.67479	0	0		0	1.07077	0	0
	0	942.866	0	0		0	711.597	0	0		0	1.25716	0	0		0	865.777	0	0		0	1.64695	0	0		0	641.445	0	0		0	638.399	0	0		0	2.80055	0	0		0	1.67813	0	0		0	1.0729	0	0
	0	944.744	0	0		0	713.015	0	0		0	1.25966	0	0		0	867.501	0	0		0	1.65023	0	0		0	642.722	0	0		0	639.671	0	0		0	2.80613	0	0		0	1.68148	0	0		0	1.07504	0	0
	0	946.623	0	0		0	714.432	0	0		0.00100172	1.26216	0.0793651	0.000429818		0	869.226	0	0		0	1.65351	0	0		0	644	0	0		0	640.943	0	0		0	2.81171	0	0		0	1.68482	0	0		0	1.07718	0	0
	0	948.501	0	0		0	715.85	0	0		0	1.26467	0	0		0	870.95	0	0		0	1.6568	0	0		0	645.278	0	0		0	642.214	0	0		0	2.81729	0	0		0	1.68816	0	0		0	1.07932	0	0
	0	950.379	0	0		0	717.267	0	0		0	1.26717	0	0		0	872.675	0	0		0	1.66008	0	0		0	646.556	0	0		0	643.486	0	0		0	2.82287	0	0		0	1.6915	0	0		0	1.08145	0	0
	0	952.257	0	0		0	718.685	0	0		0	1.26968	0	0		0	874.4	0	0		0	1.66336	0	0		0	647.834	0	0		0	644.758	0	0		0	2.82845	0	0		0	1.69485	0	0		0	1.08359	0	0
	0	954.135	0	0		0	720.102	0	0		0	1.27218	0	0		0	876.124	0	0		0.00236402	1.66664	0.141844	0.000818571		0	649.111	0	0		0	646.03	0	0		0	2.83403	0	0		0	1.69819	0	0		0	1.08573	0	0
	0	956.014	0	0		0	721.52	0	0		0	1.27469	0	0		0	877.849	0	0		0	1.66992	0	0		0	650.389	0	0		0	647.301	0	0		0	2.83961	0	0		0	1.70153	0	0		0	1.08787	0	0
	0	957.892	0	0		0	722.937	0	0		0	1.27719	0	0		0	879.574	0	0		0	1.6732	0	0		0	651.667	0	0		0	648.573	0	0		0	2.84518	0	0		0	1.70487	0	0		0	1.09	0	0
	0.523606	959.77	0.0545554	200.508		1.07312	724.355	0.148148	102.098		0.00101563	1.27969	0.0793651	0.000450539		1.99389	881.298	0.226244	668.482		0.00237798	1.67648	0.141844	0.000839919		0.421255	652.945	0.0645161	88.5885		0.876984	649.845	0.134953	118.421		0.0139743	2.85076	0.490196	0.0029508		0.00478492	1.70822	0.280112	0.00126431		0.00155575	1.09214	0.14245	0.000538836
	0			0		0			0		0			0		0			0		0			0		0			0		0			0		0			0		0			0		0			0
	0			0		0			0		0			0		0			0		0			0		0			0		0			0		0			0		0			0		0			0
	0			0		0			0		0			0		0			0		0			0		0			0		0			0		0			0		0			0		0			0
	0			0		0			0		0			0		0			0		0			0		0			0		0			0		0			0		0			0		0			0
	0			0		0			0		0			0		0			0		0			0		0			0		0			0		0			0		0			0		0			0
	0			0		0			0		0			0		0			0		0			0		0			0		0			0		0			0		0			0		0			0
	0			0		0			0		0			0		0			0		0			0		0			0		0			0		0			0		0			0		0			0
	0			0		0			0		0			0		0			0		0			0		0			0		0			0		0			0		0			0		0			0
	0			0		0			0		0			0		0			0		0			0		0			0		0			0		0			0		0			0		0			0
	0			0		0			0		0			0		0			0		0			0		0			0		0			0		0			0		0			0		0			0
	0			0		0			0		0			0		0			0		0			0		0			0		0			0		0			0		0			0		0			0
	0			0		0			0		0			0		0			0		0			0		0			0		0			0		0			0		0			0		0			0
	0			0		0			0		0			0		0			0		0			0		0			0		0			0		0			0		0			0		0			0
	0			0		0			0		0			0		0			0		0			0		0			0		0			0		0			0		0			0		0			0
	0			0		0			0		0			0		0			0		0			0		0			0		0			0		0			0		0			0		0			0
	0			0		0			0		0			0		0			0		0			0		0			0		0			0		0			0		0			0		0			0
	0			0		0			0		0			0		0			0		0			0		0			0		0			0		0			0		0			0		0			0
	0			0		0			0		0			0		0			0		0			0		0			0		0			0		0			0		0			0		0			0
	0			0		0			0		0			0		0			0		0			0		0			0		0			0		0			0		0			0		0			0
	0			0		0			0		0			0		0			0		0			0		0			0		0			0		0			0		0			0		0			0
	0			0		0			0		0			0		0			0		0			0		0			0		0			0		0			0		0			0		0			0
	0			0		0			0		0			0		0			0		0			0		0			0		0			0		0			0		0			0		0			0
	0			0		0			0		0			0		0			0		0			0		0			0		0			0		0			0		0			0		0			0
	0			0		0			0		0			0		0			0		0			0		0			0		0			0		0			0		0			0		0			0
	0			0		0			0		0			0		0			0		0			0		0			0		0			0		0			0		0			0		0			0
	0			0		0			0		0			0		0			0		0			0		0			0		0			0		0			0		0			0		0			0
	0			0		0			0		0			0		0			0		0			0		0			0		0			0		0			0		0			0		0			0
	0			0		0			0		0			0		0			0		0			0		0			0		0			0		0			0		0			0		0			0
	0			0		0			0		0			0		0			0		0			0		0			0		0			0		0			0		0			0		0			0
	0			0		0			0		0			0		0			0		0			0		0			0		0			0		0			0		0			0		0			0
	0			0		0			0		0			0		0			0		0			0		0			0		0			0		0			0		0			0		0			0
	0			0		0			0		0			0		0			0		0			0		0			0		0			0		0			0		0			0		0			0
	0			0		0			0		0			0		0			0		0			0		0			0		0			0		0			0		0			0		0			0
	0			0		0			0		0			0		0			0		0			0		0			0		0			0		0			0		0			0		0			0
	0			0		0			0		0			0		0			0		0			0		0			0		0			0		0			0		0			0		0			0
	0			0		0			0		0			0		0			0		0			0		0			0		0			0		0			0		0			0		0			0
	0			0		0			0		0			0		0			0		0			0		0			0		0			0		0			0		0			0		0			0
	0			0		0			0		0			0		0			0		0			0		0			0		0			0		0			0		0			0		0			0
	0			0		0			0		0			0		0			0		0			0		0			0		0			0		0			0		0			0		0			0
	0			0		0			0		0			0		0			0		0			0		0			0		0			0		0			0		0			0		0			0
	0			0		0			0		0			0		0			0		0			0		0			0		0			0		0			0		0			0		0			0
	0			0		0			0		0			0		0			0		0			0		0			0		0			0		0			0		0			0		0			0
	0			0		0			0		0			0		0			0		0			0		0			0		0			0		0			0		0			0		0			0
	0			0		0			0		0			0		0			0		0			0		0			0		0			0		0			0		0			0		0			0
	0			0		0			0		0			0		0			0		0			0		0			0		0			0		0			0		0			0		0			0
	0			0		0			0		0			0		0			0		0			0		0			0		0			0		0			0		0			0		0			0
	0			0		0			0		0			0		0			0		0			0		0			0		0			0		0			0		0			0		0			0
	0			0		0			0		0			0		0			0		0			0		0			0		0			0		0			0		0			0		0			0
	0			0		0			0		0			0		0			0		0			0		0			0		0			0		0			0		0			0		0			0
	0			0		0			0		0			0		0			0		0			0		0			0		0			0		0			0		0			0		0			0
	0			0		0			0		0			0		0			0		0			0		0			0		0			0		0			0		0			0		0			0
	0			0		0			0		0			0		0			0		0			0		0			0		0			0		0			0		0			0		0			0
	0			0		0			0		0			0		0			0		0			0		0			0		0			0		0			0		0			0		0			0
	0			0		0			0		0			0		0			0		0			0		0			0		0			0		0			0		0			0		0			0
	0			0		0			0		0			0		0			0		0			0		0			0		0			0		0			0		0			0		0			0
	0			0		0			0		0			0		0			0		0			0		0			0		0			0		0			0		0			0		0			0
	0			0		0			0		0			0		0			0		0			0		0			0		0			0		0			0		0			0		0			0
	0			0		0			0		0			0		0			0		0			0		0			0		0			0		0			0		0			0		0			0
	0			0		0			0		0			0		0			0		0			0		0			0		0			0		0			0		0			0		0			0
	0			0		0			0		0			0		0			0		0			0		0			0		0			0		0			0		0			0		0			0
	0			0		0			0		0			0		0			0		0			0		0			0		0			0		0			0		0			0		0			0
	0			0		0			0		0			0		0			0		0			0		0			0		0			0		0			0		0			0		0			0
	0			0		0			0		0			0		0			0		0			0		0			0		0			0		0			0		0			0		0			0
	0			0		0			0		0			0		0			0		0			0		0			0		0			0		0			0		0			0		0			0
	0			0		0			0		0			0		0			0		0			0		0			0		0			0		0			0		0			0		0			0
	0			0		0			0		0			0		0			0		0			0		0			0		0			0		0			0		0			0		0			0
	0			0		0			0		0			0		0			0		0			0		0			0		0			0		0			0		0			0		0			0
	0			0		0			0		0			0		0			0		0			0		0			0		0			0		0			0		0			0		0			0
	0			0		0			0		0			0		0			0		0			0		0			0		0			0		0			0		0			0		0			0
	0			0		0			0		0			0		0			0		0			0		0			0		0			0		0			0		0			0		0			0
	0			0		0			0		0			0		0			0		0			0		0			0		0			0		0			0		0			0		0			0
	0			0		0			0		0			0		0			0		0			0		0			0		0			0		0			0		0			0		0			0
	0			0		0			0		0			0		0			0		0			0		0			0		0			0		0			0		0			0		0			0
	0			0		0			0		0			0		0			0		0			0		0			0		0			0		0			0		0			0		0			0
	0			0		0			0		0			0		0			0		0			0		0			0		0			0		0			0		0			0		0			0
	0			0		0			0		0			0		0			0		0			0		0			0		0			0		0			0		0			0		0			0
	0			0		0			0		0			0		0			0		0			0		0			0		0			0		0			0		0			0		0			0
	0			0		0			0		0			0		0			0		0			0		0			0		0			0		0			0		0			0		0			0
	0			0		0			0		0			0		0			0		0			0		0			0		0			0		0			0		0			0		0			0
	0			0		0			0		0			0		0			0		0			0		0			0		0			0		0			0		0			0		0			0
	0			0		0			0		0			0		0			0		0			0		0			0		0			0		0			0		0			0		0			0
	0			0		0			0		0			0		0			0		0			0		0			0		0			0		0			0		0			0		0			0
[truncated: 430 more rows]

## Sheet: raw data PDMS 400kPa full AB
		2021-06-02 SUBSTRATE prim T cell full AB PDMS 400 kPa cell 2-1					2021-06-02 SUBSTRATE prim T cell full AB PDMS 400 kPa cell 3-1					2021-06-03 SUBSTRATE prim T cell full AB PDMS 400 kPa cell 3-1					2021-06-03 SUBSTRATE prim T cell full AB PDMS 400 kPa cell 4-1					2021-06-03 SUBSTRATE prim T cell full AB PDMS 400 kPa cell 5-1					2021-06-03 SUBSTRATE prim T cell full AB PDMS 400 kPa cell 6-1
[truncated: 1,028 more rows]
