# Supplementary material for: T cell stiffness is enhanced upon formation of immunological synapse
Source: eLife. 2021 Jul 27;10:e66643. doi: 10.7554/eLife.66643 (PMC8360652; doi:10.7554/eLife.66643)
Supplement: Figure 2—source data 1. [file elife-66643-fig2-data1.xlsx]

## Sheet: Source data Fig 2
	primary T cell CD3+CD28+LFA-1			primary T cell LFA-1			primary T cell primary T cell CD3+CD28+LFA-1 on PDMS (2500 kPa)			primary T cell primary T cell CD3+CD28+LFA-1 on PDMS (400 kPa)
	lamellipodium	cell body		lamellipodium	cell body		lamellipodium	cell body		lamellipodium
	[kPa]	[kPa]		[kPa]	[kPa]		[kPa]	[kPa]		[kPa]
2019-01-31 primary T cell full AB cell1-1	234.78	147.774	2019-02-22 primary T cell LFA-1 cell 4-1	82.0465	216.677	2021-03-24 primary T cell full AB PDMS cell 2-1	207.165	156.133	2021-06-02 T cell 2-1 soft PDMS lamellpodium	262.412
2019-01-31 primary T cellfull AB cell2-1	140.438	115.867	2019-02-22 primary T cell LFA-1 cell 5-1	55.0656	103.385	2021-03-24 primary T cell full AB PDMS cell 3-1	259.402	129.102	2021-06-02 T cell 3-1 soft PDMS lamellpodium	223.676
2019-01-31 primary T cell full AB cell3-1	325.083	294.43	2019-02-22 primary T cell LFA-1 cell 7-1	127.524	62.1778	2021-03-24 primary T cell full AB PDMS cell 4-1	243.453	211.482	2021-06-03 T cell 3-1 soft PDMS lamellpodium	321.499
2019-01-31 primary T cell full AB cell4-1	181.409	101.601	2019-02-22 primary T cell LFA-1 cell 8-1	229.51	68.3618	2021-03-24 primary T cell full AB PDMS cell 5-1	326.07	140.535	2021-06-03 T cell 4-1 soft PDMS lamellpodium	589.803
2019-01-31 primary T cell full AB cell5-1	457.584	480.673	2019-02-28 primary T cell LFA1 cell1-1	180.074	91.4139	2021-04-21 primary T cell full AB PDMS cell 1-1	329.525	158.138	2021-06-03 T cell 5-1 soft PDMS lamellpodium	358.375
2019-02-22 primary T cell full AB cell1-1	336.544	139.976	2019-03-07 primary T cell LFA1 cell2-2	180.074	145.548	2021-04-21 primary T cell full AB PDMS cell 2-1	207.458	247.083	2021-06-03 T cell 6-1 soft PDMS lamellpodium	192.015
2019-02-22 primary T cell full AB cell2-1	277.118	281.53	2019-03-07 primary T cell LFA1 cell4-1	80.4424	31.2829	2021-04-28 primary T cell full AB PDMS cell 1-1	375.533	236.79
2019-02-22 primary T cell full AB cell3-1	377.354	377.933	2019-03-07 primary T cell LFA1 cell5-1	108.469	34.0837	2021-04-29 primary T cell full AB PDMS cell 3-1	426.264	202.633
2019-03-14 primary T cell full AB cell3-1	180.074	306.137	2019-03-14 primary T cell LFA1 cell1-1	158.691	94.156	2021-04-29 primary T cell full AB PDMS cell 4-1	275.825	198.957
2019-03-14 primary T cell full AB cell4-1	495.916	178.845	2019-03-14 primary T cell LFA1 cell2-1	174.906	116.732	2021-04-29 primary T cell full AB PDMS cell 5-1	382.379	244.145
2019-03-14 primary T cell full AB cell5-1	230.787	172.372	2019-03-14 primary T cell LFA1 cell4-1	225.174	69.3908
Mean	294.281	236.104	Mean	145.634	93.9281	Mean	303.307	192.5	Mean	324.63
SD	115.879	121.339	SD	59.1325	53.0257	SD	76.368	43.8886	SD	143.607

## Sheet: raw data_ primary cell full AB
	2019-01-31 primary T cell full AB cell1-1 lamellipodium					2019-01-31 primary T cell full AB cell1-1 cell body					2019-01-31 primary T cell full AB cell2-1 lamellipodium					2019-01-31 primary T cell full AB cell2-1 cell body					2019-01-31 primary T cell full AB cell3-1 lamellipodium					2019-01-31 primary T cell full AB cell3-1 cell body					2019-01-31 primary T cell full AB cell4-1 lamellipodium					2019-01-31 primary T cell full AB cell4-1 cell body					2019-01-31 primary T cell full AB cell5-1 lamellipodium					2019-01-31 primary T cell full AB cell5-1 cell body
	Average	234.78				Average	147.774				Average	140.438				Average	115.867				Average	325.083				Average	294.43				Average	181.409				Average	101.601				Average	0.457584				Average	0.480673
	StDev	60.7941				StDev	42.2805				StDev	49.3292				StDev	32.348				StDev	114.832				StDev	88.1279				StDev	43.1751				StDev	27.2138				StDev	0.185475				StDev	0.295021
			setp					setp					setp					setp					setp					setp					setp					setp					setp					setp
	kPa	%				kPa	%				kPa	%				kPa	%				kPa	%				kPa	%				kPa	%				kPa	%				MPa	%				MPa	%
0	0	0.14245	78.521		0	0	0.549451	119.984		0	0	0.326797	64.4533		0	0	0.510204	68.4959		0	0	0.512821	541.944		0	0	0.446429	387.005		0	0	0.328947	108.254		0	0	0.925926	95.5817		0	0	0.396825	0.000830886		0	0	0.520833	0.00120337
0	0.747966	0	0		0	0.498644	0	0		0	0.529809	0	0		0	0.342818	0	0		0	1.13753	0	0		0	0.966122	0	0		0	0.560974	0	0		0	0.29607	0	0		0	0.00207249	0	0		0	0.0022439	0	0
0	1.49593	0	0		0	0.997288	0	0		0	1.05962	0	0		0	0.685635	0	0		0	2.27506	0	0		0	1.93224	0	0		0	1.12195	0	0		0	0.59214	0	0		0	0.00414498	0	0		0	0.0044878	0	0
0	2.2439	0	0		0	1.49593	0	0		0	1.58943	0	0		0	1.02845	0	0		0	3.41259	0	0		0	2.89837	0	0		0	1.68292	0	0		0	0.888209	0	0		0	0.00621747	0	0		0	0.00673169	0	0
0	2.99186	0	0		0	1.99458	0	0		0	2.11924	0	0		0	1.37127	0	0		0	4.55013	0	0		0	3.86449	0	0		0	2.2439	0	0		0	1.18428	0	0		3.28966e-05	0.00828995	0.396825	0.000801053		0	0.00897559	0	0
0	3.73983	0	0		0	2.49322	0	0		0	2.64905	0	0		0	1.71409	0	0		0	5.68766	0	0		0	4.83061	0	0		0	2.80487	0	0		0	1.48035	0	0		0	0.0103624	0	0		0	0.0112195	0	0
0	4.4878	0	0		0	2.99186	0	0		0	3.17885	0	0		0	2.05691	0	0		0	6.82519	0	0		0	5.79673	0	0		0	3.36585	0	0		0	1.77642	0	0		0	0.0124349	0	0		0	0.0134634	0	0
0	5.23576	0	0		0	3.49051	0	0		0	3.70866	0	0		0	2.39972	0	0		0.0408345	7.96272	0.512821	515.72		0	6.76286	0	0		0	3.92682	0	0		0	2.07249	0	0		0	0.0145074	0	0		8.18088e-05	0.0157073	0.520833	0.00112601
0	5.98373	0	0		0	3.98915	0	0		0	4.23847	0	0		0	2.74254	0	0		0	9.10025	0	0		0	7.72898	0	0		0	4.4878	0	0		0	2.36856	0	0		0	0.0165799	0	0		0	0.0179512	0	0
0	6.73169	0	0		0	4.4878	0	0		0	4.76828	0	0		0	3.08536	0	0		0	10.2378	0	0		0	8.6951	0	0		0	5.04877	0	0		0	2.66463	0	0		0	0.0186524	0	0		0	0.0201951	0	0
0	7.47966	0	0		0	4.98644	0	0		0	5.29809	0	0		0	3.42818	0	0		0	11.3753	0	0		0	9.66122	0	0		0	5.60974	0	0		0	2.9607	0	0		0	0.0207249	0	0		0	0.022439	0	0
0	8.22762	0	0		0	5.48508	0	0		0	5.8279	0	0		0	3.77099	0	0		0	12.5128	0	0		0	10.6273	0	0		0	6.17072	0	0		0	3.25677	0	0		0	0.0227974	0	0		0.000257113	0.0246829	1.04167	0.00216591
0	8.97559	0	0		0	5.98373	0	0		0	6.35771	0	0		0	4.11381	0	0		0	13.6504	0	0		0	11.5935	0	0		0	6.73169	0	0		0	3.55284	0	0		0	0.0248699	0	0		0	0.0269268	0	0
0	9.72356	0	0		0	6.48237	0	0		0	6.88752	0	0		0	4.45663	0	0		0	14.7879	0	0		0	12.5596	0	0		0	7.29267	0	0		0	3.84891	0	0		0	0.0269424	0	0		0	0.0291707	0	0
0	10.4715	0	0		0	6.98102	0	0		0	7.41733	0	0		0	4.79945	0	0		0	15.9254	0	0		0	13.5257	0	0		0	7.85364	0	0		0	4.14498	0	0		0	0.0290148	0	0		0.000327235	0.0314146	1.04167	0.00210243
0	11.2195	0	0		0	7.47966	0	0		0.025971	7.94714	0.326797	57.365		0	5.14227	0	0		0	17.063	0	0		0	14.4918	0	0		0	8.41462	0	0		0	4.44105	0	0		0	0.0310873	0	0		0	0.0336585	0	0
0	11.9674	0	0		0.0438368	7.9783	0.549451	107.378		0	8.47695	0	0		0	5.48508	0	0		0	18.2005	0	0		0.0690088	15.458	0.446429	347.435		0	8.97559	0	0		0	4.73712	0	0		0	0.0331598	0	0		0	0.0359024	0	0
0	12.7154	0	0		0	8.47695	0	0		0	9.00676	0	0		0	5.8279	0	0		0	19.338	0	0		0	16.4241	0	0		0	9.53656	0	0		0	5.03319	0	0		0	0.0352323	0	0		0	0.0381463	0	0
0	13.4634	0	0		0	8.97559	0	0		0	9.53656	0	0		0	6.17072	0	0		0	20.4756	0	0		0	17.3902	0	0		0	10.0975	0	0		0	5.32926	0	0		0	0.0373048	0	0		0	0.0403902	0	0
0	14.2113	0	0		0	9.47423	0	0		0	10.0664	0	0		0	6.51354	0	0		0	21.6131	0	0		0	18.3563	0	0		0	10.6585	0	0		0	5.62533	0	0		0.000156259	0.0393773	0.396825	0.000694036		0	0.042634	0	0
0	14.9593	0	0		0	9.97288	0	0		0	10.5962	0	0		0	6.85635	0	0		0	22.7506	0	0		0	19.3224	0	0		0	11.2195	0	0		0	5.9214	0	0		0	0.0414498	0	0		0	0.0448779	0	0
0	15.7073	0	0		0	10.4715	0	0		0	11.126	0	0		0	7.19917	0	0		0	23.8882	0	0		0	20.2886	0	0		0	11.7805	0	0		0	6.21747	0	0		0	0.0435223	0	0		0.000490853	0.0471218	1.04167	0.00195799
0	16.4552	0	0		0	10.9702	0	0		0	11.6558	0	0		0	7.54199	0	0		0	25.0257	0	0		0	21.2547	0	0		0	12.3414	0	0		0	6.51354	0	0		0	0.0455948	0	0		0	0.0493657	0	0
0	17.2032	0	0		0	11.4688	0	0		0	12.1856	0	0		0	7.88481	0	0		0	26.1632	0	0		0	22.2208	0	0		0	12.9024	0	0		0	6.80961	0	0		0.000189156	0.0476672	0.396825	0.000666793		0	0.0516096	0	0
0	17.9512	0	0		0	11.9674	0	0		0	12.7154	0	0		0	8.22762	0	0		0	27.3008	0	0		0	23.1869	0	0		0	13.4634	0	0		0	7.10567	0	0		0	0.0497397	0	0		0	0.0538535	0	0
0	18.6991	0	0		0	12.4661	0	0		0	13.2452	0	0		0	8.57044	0	0		0	28.4383	0	0		0	24.1531	0	0		0	14.0244	0	0		0	7.40175	0	0		0	0.0518122	0	0		0.000292174	0.0560974	0.520833	0.000938879
0	19.4471	0	0		0	12.9647	0	0		0	13.775	0	0		0	8.91326	0	0		0	29.5758	0	0		0	25.1192	0	0		0	14.5853	0	0		0	7.69782	0	0		0	0.0538847	0	0		0	0.0583413	0	0
0	20.1951	0	0		0	13.4634	0	0		0	14.3049	0	0		0	9.25608	0	0		0	30.7133	0	0		0	26.0853	0	0		0	15.1463	0	0		0	7.99388	0	0		0	0.0559572	0	0		0	0.0605852	0	0
0	20.943	0	0		0	13.962	0	0		0	14.8347	0	0		0	9.5989	0	0		0	31.8509	0	0		0	27.0514	0	0		0	15.7073	0	0		0	8.28996	0	0		0	0.0580297	0	0		0	0.0628291	0	0
0	21.691	0	0		0	14.4607	0	0		0	15.3645	0	0		0	9.94171	0	0		0	32.9884	0	0		0	28.0175	0	0		0	16.2683	0	0		0	8.58602	0	0		0	0.0601022	0	0		0	0.065073	0	0
0	22.439	0	0		0	14.9593	0	0		0.0519421	15.8943	0.326797	50.6896		0	10.2845	0	0		0	34.1259	0	0		0	28.9837	0	0		0	16.8292	0	0		0	8.88209	0	0		0	0.0621747	0	0		0	0.0673169	0	0
0	23.1869	0	0		0	15.458	0	0		0	16.4241	0	0		0	10.6273	0	0		0	35.2635	0	0		0	29.9498	0	0		0	17.3902	0	0		0	9.17816	0	0		0	0.0642472	0	0		0	0.0695608	0	0
0	23.9349	0	0		0.0876737	15.9566	0.549451	95.4715		0	16.9539	0	0		0	10.9702	0	0		0	36.401	0	0		0	30.9159	0	0		0	17.9512	0	0		0	9.47423	0	0		0	0.0663196	0	0		0.000373983	0.0718047	0.520833	0.000870696
0	24.6829	0	0		0	16.4552	0	0		0	17.4837	0	0		0	11.313	0	0		0	37.5385	0	0		0	31.882	0	0		0	18.5121	0	0		0	9.7703	0	0		0	0.0683921	0	0		0	0.0740486	0	0
0	25.4308	0	0		0	16.9539	0	0		0	18.0135	0	0		0	11.6558	0	0		0	38.6761	0	0		0	32.8482	0	0		0	19.0731	0	0		0	10.0664	0	0		0	0.0704646	0	0		0	0.0762925	0	0
0	26.1788	0	0		0	17.4525	0	0		0	18.5433	0	0		0	11.9986	0	0		0.204172	39.8136	0.512821	417.327		0	33.8143	0	0		0	19.6341	0	0		0	10.3624	0	0		0	0.0725371	0	0		0.000818088	0.0785364	1.04167	0.00168452
0	26.9268	0	0		0	17.9512	0	0		0	19.0731	0	0		0	12.3414	0	0		0	40.9511	0	0		0	34.7804	0	0		0	20.1951	0	0		0	10.6585	0	0		0	0.0746096	0	0		0	0.0807803	0	0
0	27.6747	0	0		0	18.4498	0	0		0	19.6029	0	0		0	12.6843	0	0		0	42.0887	0	0		0	35.7465	0	0		0	20.756	0	0		0	10.9546	0	0		0	0.0766821	0	0		0	0.0830242	0	0
0	28.4227	0	0		0	18.9485	0	0		0	20.1328	0	0		0	13.0271	0	0		0	43.2262	0	0		0	36.7127	0	0		0	21.317	0	0		0	11.2507	0	0		0	0.0787546	0	0		0	0.0852681	0	0
0	29.1707	0	0		0	19.4471	0	0		0	20.6626	0	0		0	13.3699	0	0		0	44.3637	0	0		0	37.6788	0	0		0	21.878	0	0		0	11.5467	0	0		0	0.0808271	0	0		0.000455792	0.087512	0.520833	0.000805082
0	29.9186	0	0		0	19.9458	0	0		0	21.1924	0	0		0	13.7127	0	0		0	45.5012	0	0		0	38.6449	0	0		0	22.439	0	0		0	11.8428	0	0		0	0.0828996	0	0		0	0.0897559	0	0
0	30.6666	0	0		0	20.4444	0	0		0	21.7222	0	0		0	14.0555	0	0		0	46.6388	0	0		0	39.611	0	0		0	22.9999	0	0		0	12.1389	0	0		0	0.084972	0	0		0	0.0919998	0	0
0	31.4146	0	0		0	20.943	0	0		0	22.252	0	0		0	14.3983	0	0		0	47.7763	0	0		0	40.5771	0	0		0	23.5609	0	0		0	12.4349	0	0		0	0.0870445	0	0		0	0.0942437	0	0
0	32.1625	0	0		0	21.4417	0	0		0	22.7818	0	0		0	14.7412	0	0		0	48.9138	0	0		0	41.5433	0	0		0	24.1219	0	0		0	12.731	0	0		0	0.089117	0	0		0.00100508	0.0964876	1.04167	0.00153749
0	32.9105	0	0		0	21.9403	0	0		0	23.3116	0	0		0	15.084	0	0		0	50.0514	0	0		0	42.5094	0	0		0	24.6829	0	0		0	13.0271	0	0		0	0.0911895	0	0		0	0.0987315	0	0
0	33.6585	0	0		0	22.439	0	0		0.0779131	23.8414	0.326797	44.427		0	15.4268	0	0		0	51.1889	0	0		0	43.4755	0	0		0	25.2438	0	0		0	13.3231	0	0		0	0.093262	0	0		0	0.100975	0	0
0	34.4064	0	0		0	22.9376	0	0		0	24.3712	0	0		0.0804572	15.7696	0.510204	51.12		0	52.3264	0	0		0	44.4416	0	0		0	25.8048	0	0		0	13.6192	0	0		0	0.0953345	0	0		0.000537601	0.103219	0.520833	0.000742039
0	35.1544	0	0		0	23.4363	0	0		0	24.901	0	0		0	16.1124	0	0		0	53.464	0	0		0	45.4078	0	0		0	26.3658	0	0		0	13.9153	0	0		0	0.097407	0	0		0	0.105463	0	0
0	35.9024	0	0		0.131511	23.9349	0.549451	84.2643		0	25.4308	0	0		0	16.4552	0	0		0	54.6015	0	0		0	46.3739	0	0		0	26.9268	0	0		0	14.2113	0	0		0	0.0994794	0	0		0	0.107707	0	0
0	36.6503	0	0		0	24.4336	0	0		0	25.9607	0	0		0	16.7981	0	0		0	55.739	0	0		0	47.34	0	0		0	27.4877	0	0		0	14.5074	0	0		0	0.101552	0	0		0	0.109951	0	0
0	37.3983	0	0		0	24.9322	0	0		0	26.4905	0	0		0	17.1409	0	0		0	56.8766	0	0		0	48.3061	0	0		0	28.0487	0	0		0	14.8035	0	0		0.000411208	0.103624	0.396825	0.000497173		0.000584349	0.112195	0.520833	0.000707168
0	38.1463	0	0		0	25.4308	0	0		0	27.0203	0	0		0	17.4837	0	0		0	58.0141	0	0		0	49.2722	0	0		0	28.6097	0	0		0	15.0996	0	0		0	0.105697	0	0		0	0.114439	0	0
0	38.8942	0	0		0	25.9295	0	0		0	27.5501	0	0		0	17.8265	0	0		0	59.1516	0	0		0	50.2384	0	0		0	29.1707	0	0		0	15.3956	0	0		0	0.107769	0	0		0	0.116683	0	0
0.112941	39.6422	0.2849	108.487		0	26.4281	0	0		0	28.0799	0	0		0	18.1693	0	0		0	60.2892	0	0		0	51.2045	0	0		0	29.7316	0	0		0	15.6917	0	0		0	0.109842	0	0		0.00123882	0.118927	1.04167	0.00136313
0	40.3901	0	0		0	26.9268	0	0		0	28.6097	0	0		0	18.5121	0	0		0	61.4267	0	0		0	52.1706	0	0		0	30.2926	0	0		0	15.9878	0	0		0.000444105	0.111914	0.396825	0.000474157		0	0.121171	0	0
0	41.1381	0	0		0	27.4254	0	0		0	29.1395	0	0		0	18.855	0	0		0	62.5642	0	0		0	53.1367	0	0		0	30.8536	0	0		0	16.2838	0	0		0	0.113987	0	0		0	0.123414	0	0
0	41.8861	0	0		0	27.9241	0	0		0	29.6693	0	0		0	19.1978	0	0		0.326676	63.7017	0.512821	350.36		0	54.1029	0	0		0	31.4146	0	0		0	16.5799	0	0		0	0.116059	0	0		0	0.125658	0	0
0	42.6341	0	0		0	28.4227	0	0		0	30.1991	0	0		0	19.5406	0	0		0	64.8393	0	0		0	55.069	0	0		0.105183	31.9755	0.328947	73.4549		0	16.876	0	0		0	0.118132	0	0		0.00199847	0.127902	1.5625	0.00194449
0	43.382	0	0		0	28.9214	0	0		0	30.7289	0	0		0	19.8834	0	0		0	65.9768	0	0		0	56.0351	0	0		0	32.5365	0	0		0	17.172	0	0		0	0.120204	0	0		0	0.130146	0	0
0	44.13	0	0		0	29.42	0	0		0	31.2587	0	0		0	20.2262	0	0		0	67.1143	0	0		0	57.0012	0	0		0	33.0975	0	0		0	17.4681	0	0		0	0.122277	0	0		0	0.13239	0	0
0	44.8779	0	0		0	29.9186	0	0		0.623305	31.7886	1.96078	231.463		0	20.5691	0	0		0	68.2519	0	0		0	57.9674	0	0		0	33.6585	0	0		0	17.7642	0	0		0	0.124349	0	0		0.00210365	0.134634	1.5625	0.00187099
0	45.6259	0	0		0	30.4173	0	0		0	32.3184	0	0		0	20.9119	0	0		0	69.3894	0	0		0	58.9335	0	0		0	34.2194	0	0		0	18.0603	0	0		0	0.126422	0	0		0	0.136878	0	0
0	46.3739	0	0		0	30.9159	0	0		0	32.8482	0	0		0	21.2547	0	0		0	70.5269	0	0		0	59.8996	0	0		0	34.7804	0	0		0	18.3563	0	0		0	0.128494	0	0		0	0.139122	0	0
0	47.1219	0	0		0	31.4146	0	0		0	33.378	0	0		0	21.5975	0	0		0.36751	71.6645	0.512821	329.339		0	60.8657	0	0		0	35.3414	0	0		0	18.6524	0	0		0	0.130567	0	0		0	0.141366	0	0
0	47.8698	0	0		0.175347	31.9132	0.549451	73.7566		0	33.9078	0	0		0	21.9403	0	0		0	72.802	0	0		0	61.8318	0	0		0	35.9024	0	0		0	18.9485	0	0		0	0.132639	0	0		0.0022439	0.143609	1.5625	0.00177519
0	48.6178	0	0		0	32.4119	0	0		0	34.4376	0	0		0	22.2831	0	0		0	73.9395	0	0		0	62.798	0	0		0	36.4633	0	0		0	19.2445	0	0		0	0.134712	0	0		0	0.145853	0	0
0	49.3657	0	0		0	32.9105	0	0		0	34.9674	0	0		0	22.626	0	0		0	75.0771	0	0		0.284661	63.7641	0.446429	237.53		0	37.0243	0	0		0	19.5406	0	0		0	0.136784	0	0		0	0.148097	0	0
0	50.1137	0	0		0	33.4091	0	0		0	35.4972	0	0		0	22.9688	0	0		0	76.2146	0	0		0	64.7302	0	0		0	37.5853	0	0		0	19.8367	0	0		0	0.138857	0	0		0.00391513	0.150341	2.60417	0.00284165
0	50.8617	0	0		0	33.9078	0	0		0	36.027	0	0		0	23.3116	0	0		0	77.3521	0	0		0	65.6963	0	0		0	38.1463	0	0		0	20.1328	0	0		0	0.140929	0	0		0	0.152585	0	0
0	51.6096	0	0		0	34.4064	0	0		0	36.5568	0	0		0	23.6544	0	0		0	78.4897	0	0		0	66.6625	0	0		0	38.7072	0	0		0	20.4288	0	0		0	0.143002	0	0		0	0.154829	0	0
0	52.3576	0	0		0	34.9051	0	0		0	37.0866	0	0		0.122435	23.9972	0.510204	43.0616		0.408345	79.6272	0.512821	308.967		0	67.6286	0	0		0	39.2682	0	0		0	20.7249	0	0		0	0.145074	0	0		0	0.157073	0	0
0	53.1056	0	0		0	35.4037	0	0		0	37.6165	0	0		0	24.3401	0	0		0	80.7647	0	0		0	68.5947	0	0		0	39.8292	0	0		0	21.021	0	0		0	0.147147	0	0		0	0.159317	0	0
0	53.8535	0	0		0	35.9024	0	0		0	38.1463	0	0		0	24.6829	0	0		0	81.9023	0	0		0	69.5608	0	0		0	40.3902	0	0		0	21.317	0	0		0	0.149219	0	0		0	0.161561	0	0
0	54.6015	0	0		0	36.401	0	0		0	38.6761	0	0		0	25.0257	0	0		0	83.0398	0	0		0	70.5269	0	0		0	40.9511	0	0		0	21.6131	0	0		0.00180109	0.151292	1.19048	0.00111685		0	0.163804	0	0
0	55.3495	0	0		0	36.8997	0	0		0	39.2059	0	0		0	25.3685	0	0		0	84.1773	0	0		0.319165	71.4931	0.446429	221.879		0	41.5121	0	0		0	21.9092	0	0		0	0.153364	0	0		0	0.166048	0	0
0	56.0974	0	0		0	37.3983	0	0		0.389566	39.7357	0.980392	99.4202		0	25.7113	0	0		0	85.3149	0	0		0	72.4592	0	0		0	42.0731	0	0		0	22.2052	0	0		0	0.155437	0	0		0.00175305	0.168292	1.04167	0.00101648
0	56.8454	0	0		0	37.8969	0	0		0	40.2655	0	0		0	26.0541	0	0		0	86.4524	0	0		0	73.4253	0	0		0	42.6341	0	0		0	22.5013	0	0		0	0.157509	0	0		0	0.170536	0	0
0	57.5934	0	0		0	38.3956	0	0		0	40.7953	0	0		0	26.397	0	0		0.898358	87.5899	1.02564	578.493		0	74.3914	0	0		0	43.195	0	0		0	22.7974	0	0		0.00063326	0.159582	0.396825	0.000352403		0	0.17278	0	0
0	58.3413	0	0		0	38.8942	0	0		0	41.3251	0	0		0	26.7398	0	0		0	88.7275	0	0		0	75.3576	0	0		0	43.756	0	0		0	23.0935	0	0		0	0.161654	0	0		0.000911583	0.175024	0.520833	0.00048657
0	59.0893	0	0		0	39.3929	0	0		0	41.8549	0	0		0	27.0826	0	0		0	89.865	0	0		0	76.3237	0	0		0	44.317	0	0		0	23.3895	0	0		0	0.163727	0	0		0	0.177268	0	0
0	59.8373	0	0		0.219184	39.8915	0.549451	63.9485		0	42.3847	0	0		0	27.4254	0	0		0	91.0025	0	0		0	77.2898	0	0		0	44.8779	0	0		0	23.6856	0	0		0	0.165799	0	0		0	0.179512	0	0
0	60.5852	0	0		0	40.3902	0	0		0	42.9145	0	0		0	27.7682	0	0		0	92.14	0	0		0	78.2559	0	0		0	45.4389	0	0		0.666157	23.9816	2.77778	167.356		0.000666157	0.167872	0.396825	0.000333069		0	0.181756	0	0
0	61.3332	0	0		0	40.8888	0	0		0	43.4444	0	0		0	28.111	0	0		0	93.2776	0	0		0.35367	79.222	0.446429	206.761		0	45.9999	0	0		0	24.2777	0	0		0	0.169944	0	0		0.000958331	0.184	0.520833	0.000458413
0	62.0812	0	0		0	41.3875	0	0		0	43.9742	0	0		0	28.4539	0	0		0	94.4151	0	0		0	80.1882	0	0		0	46.5609	0	0		0	24.5738	0	0		0	0.172017	0	0		0	0.186244	0	0
0	62.8291	0	0		0	41.8861	0	0		0	44.504	0	0		0	28.7967	0	0		0.490013	95.5526	0.512821	270.176		0	81.1543	0	0		0	47.1219	0	0		0	24.8699	0	0		0	0.174089	0	0		0	0.188487	0	0
0.181131	63.5771	0.2849	83.5058		0	42.3847	0	0		0	45.0338	0	0		0	29.1395	0	0		0	96.6902	0	0		0	82.1204	0	0		0	47.6828	0	0		0	25.1659	0	0		0.000699054	0.176161	0.396825	0.000314281		0.00298018	0.190731	1.5625	0.00131354
0	64.3251	0	0		0	42.8834	0	0		0	45.5636	0	0		0	29.4823	0	0		0	97.8277	0	0		0	83.0865	0	0		0	48.2438	0	0		0	25.462	0	0		0	0.178234	0	0		0	0.192975	0	0
0	65.073	0	0		0	43.382	0	0		0	46.0934	0	0		0	29.8251	0	0		0	98.9652	0	0		0	84.0527	0	0		0	48.8048	0	0		0	25.7581	0	0		0	0.180307	0	0		0	0.195219	0	0
0	65.821	0	0		0	43.8807	0	0		0	46.6232	0	0		0	30.168	0	0		0	100.103	0	0		0	85.0188	0	0		0	49.3657	0	0		0	26.0541	0	0		0.00217118	0.182379	1.19048	0.000901641		0	0.197463	0	0
0	66.569	0	0		0	44.3793	0	0		0	47.153	0	0		0	30.5108	0	0		0	101.24	0	0		0	85.9849	0	0		0	49.9267	0	0		0	26.3502	0	0		0	0.184451	0	0		0.00104014	0.199707	0.520833	0.000411157
0	67.3169	0	0		0	44.8779	0	0		0.467479	47.6828	0.980392	84.3474		0	30.8536	0	0		0	102.378	0	0		0	86.951	0	0		0	50.4877	0	0		0	26.6463	0	0		0	0.186524	0	0		0	0.201951	0	0
0	68.0649	0	0		0	45.3766	0	0		0	48.2126	0	0		0	31.1964	0	0		0.530848	103.515	0.512821	251.755		0	87.9172	0	0		0	51.0487	0	0		0	26.9424	0	0		0	0.188597	0	0		0	0.204195	0	0
0	68.8128	0	0		0	45.8752	0	0		0	48.7424	0	0		0	31.5392	0	0		0	104.653	0	0		0	88.8833	0	0		0	51.6096	0	0		0	27.2384	0	0		0	0.190669	0	0		0.0021504	0.206439	1.04167	0.000783382
0	69.5608	0	0		0	46.3739	0	0		0	49.2722	0	0		0.162663	31.882	0.510204	35.9872		0	105.79	0	0		0	89.8494	0	0		0	52.1706	0	0		0	27.5345	0	0		0	0.192742	0	0		0	0.208682	0	0
0	70.3088	0	0		0	46.8725	0	0		0	49.8021	0	0		0	32.2249	0	0		0	106.928	0	0		0	90.8155	0	0		0	52.7316	0	0		0	27.8306	0	0		0	0.194814	0	0		0	0.210926	0	0
0	71.0567	0	0		0	47.3712	0	0		0	50.3319	0	0		0	32.5677	0	0		0	108.066	0	0		0	91.7816	0	0		0	53.2926	0	0		0	28.1266	0	0		0	0.196886	0	0		0	0.21317	0	0
0.102286	71.8047	0.14245	37.8362		0	47.8698	0	0		0	50.8617	0	0		0	32.9105	0	0		0	109.203	0	0		0	92.7478	0	0		0	53.8535	0	0		0	28.4227	0	0		0.00473712	0.198959	2.38095	0.00159255		0.00112195	0.215414	0.520833	0.000366471
0	72.5527	0	0		0	48.3685	0	0		0	51.3915	0	0		0	33.2533	0	0		0	110.341	0	0		0	93.7139	0	0		0	54.4145	0	0		0	28.7188	0	0		0	0.201031	0	0		0	0.217658	0	0
0	73.3007	0	0		0	48.8671	0	0		0	51.9213	0	0		0	33.5961	0	0		0.571683	111.478	0.512821	233.985		0	94.68	0	0		0	54.9755	0	0		0	29.0148	0	0		0	0.203104	0	0		0	0.219902	0	0
0	74.0486	0	0		0	49.3657	0	0		0	52.4511	0	0		0	33.9389	0	0		0	112.616	0	0		0	95.6461	0	0		0	55.5365	0	0		0	29.3109	0	0		0	0.205176	0	0		0.00231402	0.222146	1.04167	0.000696213
0	74.7966	0	0		0	49.8644	0	0		0	52.9809	0	0		0	34.2818	0	0		0	113.753	0	0		0	96.6123	0	0		0	56.0974	0	0		0	29.607	0	0		0.000822416	0.207249	0.396825	0.000248681		0	0.22439	0	0
0	75.5446	0	0		0	50.363	0	0		0	53.5107	0	0		0	34.6246	0	0		0	114.891	0	0		0	97.5784	0	0		0	56.6584	0	0		0	29.9031	0	0		0	0.209321	0	0		0	0.226634	0	0
0	76.2925	0	0		0	50.8617	0	0		0	54.0405	0	0		0	34.9674	0	0		0	116.028	0	0		0	98.5445	0	0		0	57.2194	0	0		0	30.1991	0	0		0	0.211394	0	0		0	0.228878	0	0
0	77.0405	0	0		0	51.3603	0	0		0	54.5703	0	0		0	35.3102	0	0		0	117.166	0	0		0	99.5106	0	0		0	57.7804	0	0		0	30.4952	0	0		0	0.213466	0	0		0.00361127	0.231122	1.5625	0.000973064
0	77.7884	0	0		0	51.859	0	0		0	55.1001	0	0		0	35.653	0	0		0	118.303	0	0		0	100.477	0	0		0	58.3413	0	0		0	30.7913	0	0		0.00256594	0.215539	1.19048	0.000697451		0	0.233365	0	0
0	78.5364	0	0		0	52.3576	0	0		1.09078	55.63	1.96078	141.026		0	35.9959	0	0		0	119.441	0	0		0	101.443	0	0		0	58.9023	0	0		0	31.0873	0	0		0	0.217611	0	0		0	0.235609	0	0
0.338822	79.2844	0.427351	103.329		0	52.8563	0	0		0	56.1598	0	0		0	36.3387	0	0		0	120.578	0	0		0	102.409	0	0		0	59.4633	0	0		0	31.3834	0	0		0	0.219684	0	0		0.00123882	0.237853	0.520833	0.000307092
0	80.0323	0	0		0	53.3549	0	0		0	56.6896	0	0		0	36.6815	0	0		0	121.716	0	0		0	103.375	0	0		0	60.0243	0	0		0	31.6795	0	0		0	0.221756	0	0		0	0.240097	0	0
0	80.7803	0	0		0	53.8535	0	0		0	57.2194	0	0		0	37.0243	0	0		0	122.853	0	0		0	104.341	0	0		0	60.5852	0	0		0	31.9755	0	0		0	0.223829	0	0		0	0.242341	0	0
0	81.5283	0	0		0	54.3522	0	0		0	57.7492	0	0		0	37.3671	0	0		0	123.991	0	0		0	105.307	0	0		0	61.1462	0	0		0	32.2716	0	0		0	0.225901	0	0		0	0.244585	0	0
0	82.2762	0	0		0	54.8508	0	0		0	58.279	0	0		0	37.7099	0	0		0	125.128	0	0		0	106.273	0	0		0	61.7072	0	0		0	32.5677	0	0		0	0.227974	0	0		0.00642783	0.246829	2.60417	0.00142404
0	83.0242	0	0		0	55.3495	0	0		0	58.8088	0	0		0	38.0528	0	0		0	126.266	0	0		0	107.24	0	0		0	62.2682	0	0		0	32.8638	0	0		0.00182576	0.230046	0.793651	0.000410901		0	0.249073	0	0
0	83.7722	0	0		0.306858	55.8481	0.549451	46.4305		0	59.3386	0	0		0	38.3956	0	0		1.3067	127.403	1.02564	400.792		0	108.206	0	0		0	62.8291	0	0		0	33.1598	0	0		0	0.232119	0	0		0	0.251316	0	0
0	84.5201	0	0		0	56.3468	0	0		0	59.8684	0	0		0	38.7384	0	0		0	128.541	0	0		0	109.172	0	0		0	63.3901	0	0		0	33.4559	0	0		0	0.234191	0	0		0	0.25356	0	0
0	85.2681	0	0		0	56.8454	0	0		0	60.3982	0	0		0	39.0812	0	0		0	129.679	0	0		0	110.138	0	0		0.210365	63.9511	0.328947	45.3826		0	33.752	0	0		0	0.236264	0	0		0.00133231	0.255804	0.520833	0.000263365
0	86.0161	0	0		0	57.3441	0	0		0	60.928	0	0		0	39.424	0	0		0	130.816	0	0		0	111.104	0	0		0	64.5121	0	0		0	34.048	0	0		0.00189156	0.238336	0.793651	0.000381505		0	0.258048	0	0
0	86.764	0	0		0	57.8427	0	0		0	61.4579	0	0		0.405784	39.7668	1.02041	59.0944		0	131.954	0	0		0	112.07	0	0		0	65.073	0	0		0	34.3441	0	0		0	0.240409	0	0		0	0.260292	0	0
0.747966	87.512	0.854701	185.367		0	58.3413	0	0		0	61.9877	0	0		0	40.1097	0	0		0	133.091	0	0		0	113.036	0	0		0	65.634	0	0		0	34.6402	0	0		0	0.242481	0	0		0.00273475	0.262536	1.04167	0.000495666
0	88.26	0	0		0	58.84	0	0		0	62.5175	0	0		0	40.4525	0	0		0	134.229	0	0		0	114.002	0	0		0	66.195	0	0		0	34.9362	0	0		0	0.244554	0	0		0	0.26478	0	0
0	89.0079	0	0		0	59.3386	0	0		0	63.0473	0	0		0	40.7953	0	0		0.694186	135.366	0.512821	184.577		0	114.969	0	0		0	66.7559	0	0		0	35.2323	0	0		0.00195735	0.246626	0.793651	0.0003532		0	0.267024	0	0
0	89.7559	0	0		0	59.8373	0	0		1.03884	63.5771	1.63399	96.5282		0	41.1381	0	0		0	136.504	0	0		0	115.935	0	0		0	67.3169	0	0		0	35.5284	0	0		0	0.248699	0	0		0	0.269268	0	0
0	90.5039	0	0		0	60.3359	0	0		0	64.1069	0	0		0	41.4809	0	0		0	137.641	0	0		0	116.901	0	0		0	67.8779	0	0		0	35.8244	0	0		0	0.250771	0	0		0.00424237	0.271512	1.5625	0.000683572
0	91.2518	0	0		0	60.8346	0	0		0	64.6367	0	0		0	41.8237	0	0		0	138.779	0	0		0	117.867	0	0		0	68.4389	0	0		0	36.1205	0	0		0	0.252844	0	0		0	0.273755	0	0
0	91.9998	0	0		0	61.3332	0	0		0	65.1665	0	0		0	42.1666	0	0		0	139.916	0	0		0	118.833	0	0		0	68.9998	0	0		0	36.4166	0	0		0.00202314	0.254916	0.793651	0.000325987		0	0.275999	0	0
0	92.7478	0	0		0	61.8318	0	0		0	65.6963	0	0		0	42.5094	0	0		0	141.054	0	0		0.534818	119.799	0.446429	136.143		0	69.5608	0	0		0	36.7127	0	0		0	0.256989	0	0		0	0.278243	0	0
0	93.4957	0	0		0	62.3305	0	0		0	66.2262	0	0		0	42.8522	0	0		0	142.191	0	0		0	120.765	0	0		0	70.1218	0	0		0	37.0087	0	0		0	0.259061	0	0		0	0.280487	0	0
0	94.2437	0	0		0	62.8291	0	0		0	66.7559	0	0		0	43.195	0	0		0	143.329	0	0		0	121.731	0	0		0	70.6828	0	0		0	37.3048	0	0		0	0.261134	0	0		0	0.282731	0	0
0	94.9917	0	0		0	63.3278	0	0		0	67.2858	0	0		0	43.5378	0	0		0	144.466	0	0		0	122.698	0	0		0	71.2437	0	0		0	37.6009	0	0		0.00104447	0.263206	0.396825	0.000149932		0	0.284975	0	0
0.409144	95.7396	0.427351	82.6167		0.701389	63.8264	1.0989	77.4416		0	67.8156	0	0		0	43.8807	0	0		0	145.604	0	0		0	123.664	0	0		0.2362	71.8047	0.328947	39.5166		0	37.8969	0	0		0	0.265279	0	0		0.00299186	0.287219	1.04167	0.00038984
0	96.4876	0	0		0	64.3251	0	0		0	68.3454	0	0		0	44.2235	0	0		0	146.742	0	0		0	124.63	0	0		0	72.3657	0	0		0	38.193	0	0		0	0.267351	0	0		0	0.289463	0	0
0	97.2356	0	0		0	64.8237	0	0		0	68.8752	0	0		0	44.5663	0	0		0	147.879	0	0		0	125.596	0	0		0	72.9267	0	0		0	38.4891	0	0		0	0.269423	0	0		0	0.291707	0	0
0	97.9835	0	0		0	65.3224	0	0		0	69.405	0	0		0	44.9091	0	0		0	149.017	0	0		0	126.562	0	0		0	73.4877	0	0		0	38.7851	0	0		0.00215473	0.271496	0.793651	0.000274832		0.00306199	0.293951	1.04167	0.000363181
0	98.7315	0	0		0	65.821	0	0		0	69.9348	0	0		0	45.2519	0	0		0	150.154	0	0		0	127.528	0	0		0	74.0486	0	0		0	39.0812	0	0		0	0.273568	0	0		0	0.296195	0	0
0	99.4794	0	0		0	66.3196	0	0		0	70.4646	0	0		0	45.5947	0	0		1.55171	151.292	1.02564	309.779		0	128.494	0	0		0	74.6096	0	0		0	39.3773	0	0		0	0.275641	0	0		0	0.298438	0	0
0	100.227	0	0		0	66.8183	0	0		0	70.9944	0	0		0	45.9376	0	0		0	152.429	0	0		0	129.46	0	0		0	75.1706	0	0		0.367346	39.6734	0.925926	35.5099		0.00220408	0.277714	0.793651	0.000256773		0	0.300682	0	0
0	100.975	0	0		0	67.3169	0	0		1.63618	71.5242	2.28758	108.638		0	46.2804	0	0		0	153.567	0	0		0	130.427	0	0		0	75.7315	0	0		0	39.9694	0	0		0	0.279786	0	0		0.00157774	0.302926	0.520833	0.000164552
0	101.723	0	0		0	67.8156	0	0		0	72.054	0	0		0	46.6232	0	0		0	154.704	0	0		0	131.393	0	0		0	76.2925	0	0		0	40.2655	0	0		0	0.281859	0	0		0	0.30517	0	0
0	102.471	0	0		0	68.3142	0	0		0	72.5839	0	0		0	46.966	0	0		0	155.842	0	0		0	132.359	0	0		0	76.8535	0	0		0	40.5616	0	0		0	0.283931	0	0		0	0.307414	0	0
0.588144	103.219	0.569801	98.6227		0	68.8129	0	0		0	73.1137	0	0		0	47.3088	0	0		0	156.979	0	0		0	133.325	0	0		0	77.4145	0	0		0	40.8576	0	0		0.00226987	0.286003	0.793651	0.00023365		0.0048384	0.309658	1.5625	0.000456973
0	103.967	0	0		0	69.3115	0	0		0	73.6435	0	0		0.729362	47.6517	1.53061	71.2248		0	158.117	0	0		0	134.291	0	0		0	77.9754	0	0		0	41.1537	0	0		0	0.288076	0	0		0	0.311902	0	0
0	104.715	0	0		0	69.8101	0	0		0	74.1733	0	0		0	47.9945	0	0		0	159.254	0	0		1.20765	135.257	0.892857	226.215		0	78.5364	0	0		0	41.4498	0	0		0	0.290148	0	0		0	0.314146	0	0
0	105.463	0	0		0	70.3088	0	0		0	74.7031	0	0		0	48.3373	0	0		0	160.392	0	0		0	136.223	0	0		0	79.0974	0	0		0	41.7458	0	0		0	0.292221	0	0		0	0.31639	0	0
0	106.211	0	0		0	70.8074	0	0		0	75.2329	0	0		0	48.6801	0	0		0	161.53	0	0		0	137.189	0	0		0.524068	79.6584	0.657895	68.1128		0	42.0419	0	0		0.00350349	0.294293	1.19048	0.000317427		0.0033191	0.318634	1.04167	0.000273509
0	106.959	0	0		0	71.3061	0	0		0	75.7627	0	0		0	49.0229	0	0		0	162.667	0	0		0	138.155	0	0		0	80.2193	0	0		0	42.338	0	0		0	0.296366	0	0		0	0.320877	0	0
0	107.707	0	0		1.18359	71.8047	1.64835	95.1317		0	76.2925	0	0		0	49.3657	0	0		0	163.804	0	0		0	139.122	0	0		0	80.7803	0	0		0	42.6341	0	0		0	0.298438	0	0		0	0.323121	0	0
0	108.455	0	0		0	72.3034	0	0		0	76.8223	0	0		0	49.7086	0	0		0	164.942	0	0		0	140.088	0	0		0	81.3413	0	0		0	42.9301	0	0		0	0.300511	0	0		0.00169461	0.325365	0.520833	0.000125628
0	109.203	0	0		0	72.802	0	0		0	77.3521	0	0		0	50.0514	0	0		0	166.08	0	0		0	141.054	0	0		0	81.9023	0	0		0	43.2262	0	0		0.00600364	0.302583	1.98413	0.000476692		0	0.327609	0	0
0	109.951	0	0		0	73.3007	0	0		0	77.882	0	0		0	50.3942	0	0		2.57257	167.217	1.53846	383.411		0	142.02	0	0		0	82.4632	0	0		0	43.5223	0	0		0	0.304656	0	0		0	0.329853	0	0
0	110.699	0	0		0	73.7993	0	0		0	78.4117	0	0		0	50.737	0	0		0	168.355	0	0		1.91499	142.986	1.33929	307.169		0	83.0242	0	0		0	43.8183	0	0		0	0.306728	0	0		0	0.332097	0	0
1.11129	111.447	0.997151	151.678		0	74.2979	0	0		0	78.9416	0	0		0	51.0798	0	0		0	169.492	0	0		0	143.952	0	0		0	83.5852	0	0		0	44.1144	0	0		0	0.308801	0	0		0.00174136	0.334341	0.520833	0.000111527
0	112.195	0	0		0	74.7966	0	0		2.85681	79.4714	3.59477	133.613		0	51.4226	0	0		0	170.63	0	0		0	144.918	0	0		0	84.1462	0	0		0	44.4105	0	0		0.0049345	0.310873	1.5873	0.000341652		0	0.336585	0	0
0	112.943	0	0		0	75.2952	0	0		0	80.0012	0	0		0	51.7655	0	0		0	171.767	0	0		0	145.885	0	0		0	84.7071	0	0		0	44.7065	0	0		0	0.312946	0	0		0	0.338828	0	0
0	113.691	0	0		0	75.7939	0	0		0	80.531	0	0		0	52.1083	0	0		0	172.905	0	0		0	146.851	0	0		0	85.2681	0	0		0	45.0026	0	0		0	0.315018	0	0		0	0.341072	0	0
0	114.439	0	0		0	76.2925	0	0		0	81.0608	0	0		0	52.4511	0	0		0	174.042	0	0		0	147.817	0	0		0	85.8291	0	0		0	45.2987	0	0		0	0.317091	0	0		0.00178811	0.343316	0.520833	9.82654e-05
0	115.187	0	0		0	76.7912	0	0		0	81.5906	0	0		0	52.7939	0	0		5.39015	175.18	3.07692	691.416		0	148.783	0	0		0	86.3901	0	0		0	45.5947	0	0		0.00633261	0.319163	1.98413	0.000380165		0	0.34556	0	0
0	115.935	0	0		0	77.2898	0	0		0	82.1204	0	0		0	53.1367	0	0		0	176.317	0	0		0	149.749	0	0		0	86.951	0	0		0	45.8908	0	0		0	0.321236	0	0		0	0.347804	0	0
0	116.683	0	0		0	77.7884	0	0		0	82.6502	0	0		0	53.4796	0	0		0	177.455	0	0		0	150.715	0	0		0.575737	87.512	0.657895	58.004		0	46.1869	0	0		0	0.323308	0	0		0.00182317	0.350048	0.520833	8.88696e-05
0	117.431	0	0		0	78.2871	0	0		0	83.18	0	0		0	53.8224	0	0		0	178.592	0	0		0.677148	151.681	0.446429	90.9699		0	88.073	0	0		0	46.483	0	0		0	0.325381	0	0		0	0.352292	0	0
0	118.179	0	0		0	78.7857	0	0		0	83.7098	0	0		0	54.1652	0	0		0	179.73	0	0		0	152.647	0	0		0	88.6339	0	0		0	46.779	0	0		0.00129942	0.327453	0.396825	6.71986e-05		0	0.354536	0	0
0	118.927	0	0		0	79.2844	0	0		0	84.2396	0	0		0	54.508	0	0		0	180.868	0	0		0	153.613	0	0		0	89.1949	0	0		0	47.0751	0	0		0	0.329526	0	0		0	0.35678	0	0
1.36381	119.674	1.1396	150.99		0.438368	79.783	0.549451	25.3998		0	84.7695	0	0		0	54.8508	0	0		0	182.005	0	0		0	154.58	0	0		0	89.7559	0	0		0	47.3712	0	0		0	0.331598	0	0		0.00186991	0.359024	0.520833	7.70763e-05
0	120.422	0	0		0	80.2817	0	0		0	85.2993	0	0		0	55.1936	0	0		0.939192	183.143	0.512821	103.319		0	155.546	0	0		0	90.3169	0	0		0.441363	47.6672	0.925926	26.9341		0	0.333671	0	0		0	0.361268	0	0
0	121.171	0	0		0	80.7803	0	0		0	85.8291	0	0		0	55.5365	0	0		0	184.28	0	0		0	156.512	0	0		0	90.8778	0	0		0	47.9633	0	0		0	0.335743	0	0		0	0.363511	0	0
0	121.918	0	0		0	81.2789	0	0		0	86.3589	0	0		0.855295	55.8793	1.53061	55.0797		0	185.418	0	0		0	157.478	0	0		0	91.4388	0	0		0	48.2594	0	0		0	0.337816	0	0		0.00380995	0.365755	1.04167	0.000137564
0	122.666	0	0		0	81.7776	0	0		0	86.8887	0	0		0	56.2221	0	0		0	186.555	0	0		0	158.444	0	0		0	91.9998	0	0		0	48.5555	0	0		0	0.339888	0	0		0	0.367999	0	0
0	123.414	0	0		0	82.2763	0	0		1.42841	87.4185	1.63399	45.9316		0	56.5649	0	0		0	187.693	0	0		2.13496	159.41	1.33929	244.157		0	92.5608	0	0		0	48.8515	0	0		0.00949891	0.341961	2.77778	0.000371356		0	0.370243	0	0
0	124.162	0	0		0	82.7749	0	0		0	87.9483	0	0		0	56.9077	0	0		0	188.83	0	0		0	160.376	0	0		0	93.1217	0	0		0	49.1476	0	0		0	0.344033	0	0		0	0.372487	0	0
0	124.91	0	0		0	83.2735	0	0		0	88.4781	0	0		0	57.2505	0	0		0	189.968	0	0		0	161.343	0	0		0	93.6827	0	0		0	49.4437	0	0		0	0.346106	0	0		0.00195172	0.374731	0.520833	5.84573e-05
0	125.658	0	0		0	83.7722	0	0		0	89.0079	0	0		0	57.5934	0	0		0.980027	191.105	0.512821	92.0516		0	162.309	0	0		0	94.2437	0	0		0	49.7397	0	0		0	0.348178	0	0		0	0.376975	0	0
0	126.406	0	0		0	84.2708	0	0		0	89.5377	0	0		0	57.9362	0	0		0	192.243	0	0		0	163.275	0	0		0	94.8047	0	0		0	50.0358	0	0		0.00277977	0.350251	0.793651	9.14324e-05		0	0.379219	0	0
1.26792	127.154	0.997151	115.504		0	84.7695	0	0		0	90.0675	0	0		0	58.279	0	0		0	193.38	0	0		0	164.241	0	0		0.313703	95.3657	0.328947	24.3534		0	50.3319	0	0		0	0.352323	0	0		0.00397357	0.381463	1.04167	0.000102529
0	127.902	0	0		0	85.2681	0	0		0	90.5974	0	0		0	58.6218	0	0		0	194.518	0	0		0	165.207	0	0		0	95.9266	0	0		0	50.6279	0	0		0	0.354396	0	0		0	0.383707	0	0
0	128.65	0	0		0	85.7668	0	0		0	91.1272	0	0		0	58.9646	0	0		0	195.655	0	0		0	166.173	0	0		0	96.4876	0	0		0	50.924	0	0		0	0.356468	0	0		0	0.38595	0	0
0	129.398	0	0		0	86.2654	0	0		0	91.657	0	0		0	59.3075	0	0		0	196.793	0	0		0.746157	167.139	0.446429	72.3347		0	97.0486	0	0		0	51.2201	0	0		0.0113822	0.35854	3.1746	0.000311417		0	0.388194	0	0
0	130.146	0	0		0	86.764	0	0		0	92.1868	0	0		0	59.6503	0	0		0	197.93	0	0		0	168.105	0	0		0	97.6095	0	0		0	51.5162	0	0		0	0.360613	0	0		0.00406707	0.390438	1.04167	8.48164e-05
0	130.894	0	0		0	87.2627	0	0		0	92.7166	0	0		0	59.9931	0	0		1.02086	199.068	0.512821	81.435		0	169.071	0	0		0	98.1705	0	0		0	51.8122	0	0		0	0.362685	0	0		0	0.392682	0	0
0	131.642	0	0		0.96441	87.7613	1.0989	39.5771		0	93.2464	0	0		0	60.3359	0	0		0	200.206	0	0		0	170.038	0	0		0	98.7315	0	0		0	52.1083	0	0		0	0.364758	0	0		0	0.394926	0	0
0	132.39	0	0		0	88.26	0	0		0	93.7762	0	0		0	60.6787	0	0		0	201.343	0	0		0	171.004	0	0		0	99.2925	0	0		0	52.4044	0	0		0.00436703	0.366831	1.19048	9.80502e-05		0.00413719	0.39717	1.04167	7.26337e-05
0	133.138	0	0		0	88.7586	0	0		0	94.306	0	0		0	61.0215	0	0		0	202.481	0	0		0	171.97	0	0		0	99.8534	0	0		0	52.7004	0	0		0	0.368903	0	0		0	0.399414	0	0
0	133.886	0	0		0	89.2573	0	0		0	94.8358	0	0		0	61.3644	0	0		0	203.618	0	0		0	172.936	0	0		0	100.414	0	0		0	52.9965	0	0		0	0.370976	0	0		0	0.401658	0	0
0	134.634	0	0		0	89.7559	0	0		3.11652	95.3657	3.26797	66.388		0	61.7072	0	0		0	204.756	0	0		0	173.902	0	0		0	100.975	0	0		0	53.2926	0	0		0	0.373048	0	0		0	0.403902	0	0
1.34996	135.382	0.997151	98.5191		0	90.2545	0	0		0	95.8954	0	0		0	62.05	0	0		0	205.893	0	0		1.56132	174.868	0.892857	127.634		0	101.536	0	0		0	53.5886	0	0		0.0119086	0.37512	3.1746	0.000215881		0	0.406145	0	0
0	136.13	0	0		0	90.7532	0	0		0	96.4253	0	0		0	62.3928	0	0		3.18509	207.031	1.53846	214.406		0	175.834	0	0		0	102.097	0	0		0	53.8847	0	0		0	0.377193	0	0		0	0.408389	0	0
0	136.878	0	0		0	91.2518	0	0		0	96.9551	0	0		0	62.7356	0	0		0	208.168	0	0		0	176.8	0	0		0	102.658	0	0		0	54.1808	0	0		0	0.379265	0	0		0	0.410633	0	0
0	137.626	0	0		0	91.7505	0	0		0	97.4849	0	0		0	63.0784	0	0		0	209.306	0	0		0	177.767	0	0		0	103.219	0	0		0	54.4768	0	0		0.00453974	0.381338	1.19048	6.92081e-05		0	0.412877	0	0
0	138.374	0	0		0	92.2491	0	0		0	98.0147	0	0		0	63.4213	0	0		0	210.443	0	0		0	178.733	0	0		2.0483	103.78	1.97368	118.938		0	54.7729	0	0		0	0.38341	0	0		0.00216209	0.415121	0.520833	2.23807e-05
0	139.122	0	0		0	92.7478	0	0		0	98.5445	0	0		2.92794	63.7641	4.59184	124.656		0	211.581	0	0		0	179.699	0	0		0	104.341	0	0		0	55.069	0	0		0	0.385483	0	0		0	0.417365	0	0
0	139.87	0	0		0	93.2464	0	0		0	99.0743	0	0		0	64.1069	0	0		0	212.718	0	0		0	180.665	0	0		0	104.902	0	0		0	55.365	0	0		0	0.387555	0	0		0	0.419609	0	0
0	140.618	0	0		0	93.7451	0	0		0	99.6041	0	0		0	64.4497	0	0		0	213.856	0	0		0	181.631	0	0		0	105.463	0	0		1.54614	55.6611	2.77778	58.625		0.00618457	0.389628	1.5873	7.33024e-05		0.00219715	0.421853	0.520833	1.80201e-05
0	141.365	0	0		0	94.2437	0	0		0	100.134	0	0		0	64.7925	0	0		4.41012	214.993	2.05128	248.61		0	182.597	0	0		0	106.024	0	0		0	55.9572	0	0		0	0.3917	0	0		0	0.424097	0	0
0	142.113	0	0		0	94.7423	0	0		0	100.664	0	0		0	65.1354	0	0		0	216.131	0	0		4.91687	183.563	2.67857	329.235		0	106.585	0	0		0	56.2533	0	0		0	0.393773	0	0		0	0.426341	0	0
0	142.862	0	0		0	95.241	0	0		0	101.194	0	0		0	65.4782	0	0		0	217.268	0	0		0	184.529	0	0		0	107.146	0	0		0	56.5493	0	0		0	0.395845	0	0		0	0.428584	0	0
1.63657	143.609	1.1396	94.7251		3.15625	95.7396	3.2967	89.2605		0	101.723	0	0		0	65.821	0	0		0	218.406	0	0		0	185.495	0	0		0	107.707	0	0		0	56.8454	0	0		0.0142114	0.397918	3.57143	0.000127145		0.0022439	0.430828	0.520833	1.29402e-05
0	144.357	0	0		0	96.2383	0	0		0	102.253	0	0		0	66.1638	0	0		0	219.543	0	0		0	186.462	0	0		0	108.268	0	0		0	57.1415	0	0		0	0.39999	0	0		0	0.433072	0	0
0	145.105	0	0		0	96.7369	0	0		0	102.783	0	0		0	66.5066	0	0		0	220.681	0	0		0	187.428	0	0		0	108.829	0	0		0	57.4375	0	0		0	0.402063	0	0		0	0.435316	0	0
0	145.853	0	0		0	97.2356	0	0		4.38911	103.313	4.24837	58.5529		0	66.8495	0	0		0	221.819	0	0		0	188.394	0	0		0	109.39	0	0		0	57.7336	0	0		0	0.404135	0	0		0.00455792	0.43756	1.04167	1.93621e-05
0	146.601	0	0		0	97.7342	0	0		0	103.843	0	0		0	67.1923	0	0		2.28673	222.956	1.02564	106.974		0	189.36	0	0		0	109.951	0	0		0	58.0297	0	0		0.00967161	0.406208	2.38095	6.28458e-05		0	0.439804	0	0
0	147.349	0	0		0	98.2328	0	0		0	104.372	0	0		0	67.5351	0	0		0	224.094	0	0		0	190.326	0	0		0	110.512	0	0		0	58.3257	0	0		0	0.40828	0	0		0	0.442048	0	0
0	148.097	0	0		0	98.7315	0	0		0	104.902	0	0		0	67.8779	0	0		0	225.231	0	0		5.97788	191.292	3.125	332.419		0	111.073	0	0		0	58.6218	0	0		0	0.410353	0	0		0	0.444292	0	0
0	148.845	0	0		0	99.2301	0	0		0	105.432	0	0		0	68.2207	0	0		0	226.369	0	0		0	192.258	0	0		2.93773	111.634	2.63158	128.119		0	58.9179	0	0		0	0.412425	0	0		0	0.446536	0	0
0	149.593	0	0		0	99.7288	0	0		0	105.962	0	0		0	68.5635	0	0		0	227.506	0	0		0	193.225	0	0		0	112.195	0	0		0	59.214	0	0		0.0131587	0.414498	3.1746	5.89343e-05		0	0.448779	0	0
0	150.341	0	0		0	100.227	0	0		0	106.492	0	0		0	68.9064	0	0		0	228.644	0	0		0	194.191	0	0		0	112.756	0	0		0	59.51	0	0		0	0.41657	0	0		0	0.451023	0	0
2.15227	151.089	1.4245	99.7751		0	100.726	0	0		0	107.021	0	0		0	69.2492	0	0		0	229.781	0	0		0	195.157	0	0		0	113.317	0	0		0	59.8061	0	0		0	0.418643	0	0		0.0070823	0.453267	1.5625	1.17358e-05
0	151.837	0	0		0	101.225	0	0		0	107.551	0	0		0	69.592	0	0		2.3684	230.919	1.02564	90.9426		0	196.123	0	0		0	113.878	0	0		0	60.1022	0	0		0	0.420715	0	0		0	0.455511	0	0
0	152.585	0	0		0	101.723	0	0		0	108.081	0	0		0	69.9348	0	0		0	232.056	0	0		0	197.089	0	0		0	114.439	0	0		0	60.3982	0	0		0.00838864	0.422788	1.98413	2.40236e-05		0	0.457755	0	0
0	153.333	0	0		0	102.222	0	0		0	108.611	0	0		0	70.2776	0	0		0	233.194	0	0		0	198.055	0	0		0	115	0	0		0	60.6943	0	0		0	0.42486	0	0		0	0.459999	0	0
0	154.081	0	0		0	102.721	0	0		0	109.141	0	0		0	70.6204	0	0		0	234.332	0	0		6.21941	199.021	3.125	284.465		0	115.561	0	0		0	60.9904	0	0		0	0.426933	0	0		0.00722255	0.462243	1.5625	5.30749e-06
0	154.829	0	0		0	103.219	0	0		0	109.671	0	0		0	70.9633	0	0		0	235.469	0	0		0	199.987	0	0		0	116.122	0	0		0	61.2865	0	0		0.0153216	0.429005	3.57143	2.91698e-05		0	0.464487	0	0
0	155.577	0	0		3.41927	103.718	3.2967	63.9869		0	110.2	0	0		0	71.3061	0	0		0	236.607	0	0		0	200.953	0	0		0	116.683	0	0		0	61.5825	0	0		0	0.431078	0	0		0	0.466731	0	0
0	156.325	0	0		0	104.217	0	0		0	110.73	0	0		1.82778	71.6489	2.55102	49.8789		0	237.744	0	0		0	201.92	0	0		0	117.244	0	0		0	61.8786	0	0		0	0.43315	0	0		0.0097703	0.468975	2.08333	2.85124e-06
0	157.073	0	0		0	104.715	0	0		4.36313	111.26	3.92157	33.3856		0	71.9917	0	0		3.6751	238.882	1.53846	114.319		0	202.886	0	0		0	117.805	0	0		0	62.1747	0	0		0	0.435223	0	0		0	0.471218	0	0
0	157.821	0	0		0	105.214	0	0		0	111.79	0	0		0	72.3345	0	0		0	240.019	0	0		0	203.852	0	0		0	118.366	0	0		0	62.4707	0	0		0.00520589	0.437295	1.19048	4.90052e-06		0	0.473462	0	0
0	158.569	0	0		0	105.713	0	0		0	112.32	0	0		0	72.6774	0	0		0	241.157	0	0		0	204.818	0	0		0	118.927	0	0		0	62.7668	0	0		0	0.439368	0	0		0	0.475706	0	0
2.95031	159.317	1.85185	105.458		0	106.211	0	0		0	112.849	0	0		0	73.0202	0	0		0	242.294	0	0		0	205.784	0	0		1.96526	119.487	1.64474	63.0632		0	63.0629	0	0		0	0.44144	0	0		0	0.47795	0	0
0	160.065	0	0		0	106.71	0	0		0	113.379	0	0		0	73.363	0	0		0	243.432	0	0		4.61496	206.75	2.23214	171.602		0	120.049	0	0		0	63.3589	0	0		0	0.443513	0	0		0	0.480194	0	0
0	160.813	0	0		0	107.208	0	0		0	113.909	0	0		0	73.7058	0	0		0	244.569	0	0		0	207.716	0	0		0	120.609	0	0		1.76819	63.655	2.77778	39.9978		0.00884097	0.445585	1.98413	2.85667e-06		0	0.482438	0	0
0	161.561	0	0		0	107.707	0	0		0	114.439	0	0		0	74.0486	0	0		0	245.707	0	0		0	208.683	0	0		0	121.171	0	0		0	63.9511	0	0		0	0.447657	0	0		0.00504877	0.484682	1.04167	1.67376e-07
0	162.309	0	0		0	108.206	0	0		0	114.969	0	0		0	74.3914	0	0		5.06347	246.844	2.05128	125.565		0	209.649	0	0		0	121.731	0	0		0	64.2472	0	0		0	0.44973	0	0		0	0.486926	0	0
0	163.057	0	0		0	108.704	0	0		0	115.498	0	0		0	74.7343	0	0		0	247.982	0	0		0	210.615	0	0		0	122.292	0	0		0	64.5432	0	0		0	0.451802	0	0		0	0.48917	0	0
0	163.804	0	0		0	109.203	0	0		0	116.028	0	0		0	75.0771	0	0		0	249.119	0	0		0	211.581	0	0		0	122.853	0	0		0	64.8393	0	0		0.0108065	0.453875	2.38095	3.2756e-07		0	0.491414	0	0
0	164.553	0	0		0	109.702	0	0		0	116.558	0	0		0	75.4199	0	0		0	250.257	0	0		0	212.547	0	0		0	123.414	0	0		0	65.1354	0	0		0	0.455948	0	0		0.00514227	0.493658	1.04167	1.75614e-06
0	165.3	0	0		0	110.2	0	0		0	117.088	0	0		0	75.7627	0	0		0	251.394	0	0		0	213.513	0	0		0	123.975	0	0		0	65.4314	0	0		0	0.45802	0	0		0	0.495901	0	0
0	166.048	0	0		0	110.699	0	0		0	117.618	0	0		0	76.1055	0	0		0	252.532	0	0		0	214.479	0	0		0	124.536	0	0		0	65.7275	0	0		0	0.460093	0	0		0	0.498145	0	0
0	166.796	0	0		0	111.198	0	0		0	118.147	0	0		0	76.4483	0	0		0	253.669	0	0		4.80905	215.445	2.23214	139.255		0	125.097	0	0		0	66.0236	0	0		0.0110039	0.462165	2.38095	4.99631e-07		0	0.500389	0	0
4.05734	167.544	2.42165	109.475		4.90972	111.696	4.3956	57.2133		0	118.677	0	0		0	76.7912	0	0		7.84022	254.807	3.07692	151.961		0	216.411	0	0		0	125.658	0	0		0	66.3196	0	0		0	0.464238	0	0		0.00785364	0.502633	1.5625	7.53489e-06
0	168.292	0	0		0	112.195	0	0		5.06435	119.207	4.24837	19.1487		0	77.134	0	0		0	255.945	0	0		0	217.378	0	0		0	126.219	0	0		0	66.6157	0	0		0	0.46631	0	0		0	0.504877	0	0
0	169.04	0	0		0	112.694	0	0		0	119.737	0	0		0	77.4768	0	0		0	257.082	0	0		0	218.344	0	0		0	126.78	0	0		0	66.9118	0	0		0	0.468382	0	0		0	0.507121	0	0
0	169.788	0	0		0	113.192	0	0		0	120.267	0	0		0	77.8196	0	0		0	258.22	0	0		0	219.31	0	0		3.35108	127.341	2.63158	76.929		0	67.2078	0	0		0.00746754	0.470455	1.5873	2.62948e-06		0.00530588	0.509365	1.04167	8.57497e-06
0	170.536	0	0		0	113.691	0	0		0	120.796	0	0		0	78.1624	0	0		0	259.357	0	0		0	220.276	0	0		0	127.902	0	0		0	67.5039	0	0		0	0.472527	0	0		0	0.511609	0	0
0	171.284	0	0		0	114.189	0	0		0	121.326	0	0		0	78.5053	0	0		0	260.495	0	0		0	221.242	0	0		0	128.463	0	0		0	67.8	0	0		0	0.4746	0	0		0	0.513853	0	0
0	172.032	0	0		0	114.688	0	0		0	121.856	0	0		0	78.8481	0	0		0	261.632	0	0		0	222.208	0	0		0	129.024	0	0		0	68.0961	0	0		0	0.476672	0	0		0	0.516096	0	0
0	172.78	0	0		0	115.187	0	0		0	122.386	0	0		0	79.1909	0	0		2.69507	262.77	1.02564	39.8253		6.9742	223.174	3.125	158.669		0	129.585	0	0		0	68.3921	0	0		0.00569934	0.478745	1.19048	5.3307e-06		0.00269969	0.51834	0.520833	7.3896e-06
0	173.528	0	0		0	115.685	0	0		0	122.916	0	0		2.84049	79.5337	3.57143	47.1471		0	263.907	0	0		0	224.14	0	0		0	130.146	0	0		0	68.6882	0	0		0	0.480817	0	0		0	0.520584	0	0
0	174.276	0	0		0	116.184	0	0		0	123.445	0	0		0	79.8765	0	0		0	265.045	0	0		0	225.107	0	0		0	130.707	0	0		0	68.9843	0	0		0	0.48289	0	0		0	0.522828	0	0
5.98373	175.024	3.4188	122.079		0	116.683	0	0		0	123.975	0	0		0	80.2193	0	0		0	266.182	0	0		0	226.073	0	0		0	131.268	0	0		0	69.2803	0	0		0.00577336	0.484962	1.19048	8.92339e-06		0.0054695	0.525072	1.04167	2.05338e-05
0	175.772	0	0		0	117.181	0	0		0	124.505	0	0		0	80.5622	0	0		0	267.32	0	0		0	227.039	0	0		0	131.829	0	0		0	69.5764	0	0		0	0.487035	0	0		0	0.527316	0	0
0	176.52	0	0		0	117.68	0	0		0	125.035	0	0		0	80.905	0	0		0	268.457	0	0		0	228.005	0	0		0	132.39	0	0		0	69.8725	0	0		0	0.489107	0	0		0	0.52956	0	0
0	177.268	0	0		0	118.179	0	0		0	125.565	0	0		0	81.2478	0	0		0	269.595	0	0		0	228.971	0	0		0	132.951	0	0		0	70.1685	0	0		0	0.49118	0	0		0	0.531804	0	0
0	178.016	0	0		0	118.677	0	0		0	126.095	0	0		0	81.5906	0	0		5.55349	270.733	2.05128	60.5947		0	229.937	0	0		0	133.512	0	0		0	70.4646	0	0		0.0039147	0.493252	0.793651	1.0097e-05		0	0.534048	0	0
0	178.764	0	0		0	119.176	0	0		0	126.624	0	0		0	81.9334	0	0		0	271.87	0	0		7.21573	230.903	3.125	126.114		0	134.073	0	0		0	70.7607	0	0		0	0.495325	0	0		0	0.536292	0	0
0	179.512	0	0		5.91797	119.674	4.94505	39.0451		8.72627	127.154	6.86275	12.1091		0	82.2762	0	0		0	273.007	0	0		0	231.869	0	0		0	134.634	0	0		0	71.0568	0	0		0	0.497397	0	0		0	0.538535	0	0
0	180.26	0	0		0	120.173	0	0		0	127.684	0	0		0	82.6191	0	0		0	274.145	0	0		0	232.835	0	0		6.6708	135.195	4.93421	105.382		0	71.3528	0	0		0	0.49947	0	0		0.00281656	0.540779	0.520833	1.88163e-05
0	181.008	0	0		0	120.672	0	0		0	128.214	0	0		0	82.9619	0	0		0	275.283	0	0		0	233.802	0	0		0	135.756	0	0		0.663416	71.6489	0.925926	8.3069		0	0.501542	0	0		0	0.543023	0	0
0	181.756	0	0		0	121.171	0	0		0	128.744	0	0		0	83.3047	0	0		0	276.42	0	0		0	234.768	0	0		0	136.317	0	0		0	71.945	0	0		0	0.503615	0	0		0	0.545267	0	0
0	182.504	0	0		0	121.669	0	0		0	129.273	0	0		0	83.6475	0	0		0	277.558	0	0		0	235.734	0	0		0	136.878	0	0		0	72.241	0	0		0	0.505687	0	0		0	0.547511	0	0
5.22084	183.252	2.849	75.6469		0	122.168	0	0		0	129.803	0	0		0	83.9903	0	0		5.71682	278.695	2.05128	44.1403		0	236.7	0	0		0	137.439	0	0		0	72.5371	0	0		0	0.50776	0	0		0.00286331	0.549755	0.520833	2.48556e-05
0	184	0	0		0	122.666	0	0		0	130.333	0	0		0	84.3331	0	0		0	279.833	0	0		0	237.666	0	0		0	138	0	0		0	72.8332	0	0		0.0101157	0.509832	1.98413	5.41639e-05		0	0.551999	0	0
0	184.748	0	0		0	123.165	0	0		0	130.863	0	0		0	84.676	0	0		0	280.97	0	0		7.45726	238.632	3.125	97.2937		0	138.561	0	0		0	73.1292	0	0		0	0.511905	0	0		0	0.554243	0	0
0	185.495	0	0		0	123.664	0	0		0	131.393	0	0		0	85.0188	0	0		0	282.108	0	0		0	239.598	0	0		0	139.122	0	0		0	73.4253	0	0		0	0.513977	0	0		0.0086951	0.556487	1.5625	8.98071e-05
0	186.244	0	0		0	124.162	0	0		0	131.923	0	0		0	85.3616	0	0		0	283.245	0	0		0	240.565	0	0		0	139.683	0	0		0	73.7214	0	0		0	0.51605	0	0		0	0.558731	0	0
0	186.992	0	0		0	124.661	0	0		0	132.452	0	0		0	85.7044	0	0		0	284.383	0	0		0	241.531	0	0		0	140.244	0	0		0	74.0174	0	0		0.0102802	0.518122	1.98413	7.27155e-05		0	0.560974	0	0
0	187.739	0	0		0	125.16	0	0		0	132.982	0	0		0	86.0472	0	0		0	285.52	0	0		0	242.497	0	0		0	140.805	0	0		0	74.3135	0	0		0	0.520195	0	0		0	0.563218	0	0
0	188.487	0	0		0	125.658	0	0		0	133.512	0	0		0	86.3901	0	0		10.2903	286.658	3.58974	53.0026		0	243.463	0	0		0	141.365	0	0		0	74.6096	0	0		0	0.522267	0	0		0.0117805	0.565462	2.08333	0.000149774
0	189.235	0	0		0	126.157	0	0		0	134.042	0	0		0	86.7329	0	0		0	287.795	0	0		0	244.429	0	0		0	141.927	0	0		0	74.9057	0	0		0	0.52434	0	0		0	0.567706	0	0
0	189.983	0	0		0	126.656	0	0		0	134.571	0	0		0	87.0757	0	0		0	288.933	0	0		0	245.395	0	0		0	142.488	0	0		0	75.2017	0	0		0.00417787	0.526412	0.793651	3.75976e-05		0	0.56995	0	0
8.15091	190.731	4.2735	82.9193		0	127.154	0	0		0	135.101	0	0		3.5681	87.4185	4.08163	33.0337		0	290.07	0	0		0	246.361	0	0		0	143.048	0	0		0	75.4978	0	0		0	0.528485	0	0		0	0.572194	0	0
0	191.479	0	0		7.01389	127.653	5.49451	22.2451		7.09182	135.631	5.22876	1.20793		0	87.7613	0	0		0	291.208	0	0		5.5207	247.327	2.23214	49.5238		6.61359	143.609	4.60526	65.7997		0	75.7939	0	0		0	0.530557	0	0		0.00598373	0.574438	1.04167	9.15809e-05
0	192.227	0	0		0	128.151	0	0		0	136.161	0	0		0	88.1042	0	0		0	292.346	0	0		0	248.293	0	0		0	144.17	0	0		0	76.0899	0	0		0.00422722	0.53263	0.793651	4.4697e-05		0	0.576682	0	0
0	192.975	0	0		0	128.65	0	0		0	136.691	0	0		0	88.447	0	0		0	293.483	0	0		0	249.26	0	0		0	144.731	0	0		0	76.386	0	0		0	0.534702	0	0		0	0.578926	0	0
0	193.723	0	0		0	129.149	0	0		0	137.221	0	0		0	88.7898	0	0		10.5761	294.621	3.58974	33.3116		0	250.226	0	0		0	145.292	0	0		0	76.6821	0	0		0	0.536775	0	0		0.00302692	0.58117	0.520833	5.26015e-05
0	194.471	0	0		0	129.647	0	0		0	137.75	0	0		0	89.1326	0	0		0	295.758	0	0		0	251.192	0	0		0	145.853	0	0		0	76.9781	0	0		0	0.538847	0	0		0	0.583413	0	0
0	195.219	0	0		0	130.146	0	0		0	138.28	0	0		0	89.4754	0	0		0	296.896	0	0		0	252.158	0	0		0	146.414	0	0		0	77.2742	0	0		0.00858603	0.540919	1.5873	0.000110235		0	0.585657	0	0
0	195.967	0	0		0	130.645	0	0		0	138.81	0	0		0	89.8182	0	0		0	298.033	0	0		0	253.124	0	0		0	146.975	0	0		0	77.5703	0	0		0	0.542992	0	0		0	0.587901	0	0
0	196.715	0	0		0	131.143	0	0		0	139.34	0	0		0	90.1611	0	0		0	299.171	0	0		0	254.09	0	0		0	147.536	0	0		0	77.8664	0	0		0	0.545065	0	0		0.0122947	0.590145	2.08333	0.000249668
0	197.463	0	0		0	131.642	0	0		0	139.87	0	0		0	90.5039	0	0		0	300.308	0	0		4.55458	255.056	1.78571	27.6839		0	148.097	0	0		0	78.1624	0	0		0	0.547137	0	0		0	0.592389	0	0
0	198.211	0	0		0	132.141	0	0		0	140.399	0	0		0	90.8467	0	0		0	301.446	0	0		0	256.022	0	0		0	148.658	0	0		0	78.4585	0	0		0	0.54921	0	0		0	0.594633	0	0
6.5186	198.959	3.27635	42.0412		0	132.639	0	0		0	140.929	0	0		0	91.1895	0	0		12.4137	302.583	4.10256	20.769		0	256.989	0	0		0	149.219	0	0		0	78.7546	0	0		0	0.551282	0	0		0.00310873	0.596877	0.520833	7.03293e-05
0	199.707	0	0		0	133.138	0	0		0	141.459	0	0		0	91.5323	0	0		0	303.721	0	0		0	257.955	0	0		0	149.78	0	0		0	79.0506	0	0		0	0.553354	0	0		0	0.599121	0	0
0	200.455	0	0		0	133.637	0	0		0	141.989	0	0		0	91.8751	0	0		0	304.858	0	0		0	258.921	0	0		0	150.341	0	0		0	79.3467	0	0		0	0.555427	0	0		0	0.601364	0	0
0	201.203	0	0		0	134.135	0	0		0	142.519	0	0		0	92.218	0	0		0	305.996	0	0		0	259.887	0	0		0	150.902	0	0		5.16203	79.6428	6.48148	31.2522		0.0066369	0.557499	1.19048	0.000118846		0	0.603608	0	0
0	201.951	0	0		0	134.634	0	0		0	143.048	0	0		0	92.5608	0	0		0	307.134	0	0		0	260.853	0	0		5.48057	151.463	3.61842	32.448		0	79.9389	0	0		0	0.559572	0	0		0.00631096	0.605852	1.04167	0.000163227
0	202.699	0	0		8.16735	135.132	6.04396	9.65859		10.7918	143.578	7.51634	0.741453		0	92.9036	0	0		0	308.271	0	0		0	261.819	0	0		0	152.024	0	0		0	80.2349	0	0		0	0.561644	0	0		0	0.608096	0	0
0	203.447	0	0		0	135.631	0	0		0	144.108	0	0		0	93.2464	0	0		0	309.409	0	0		7.03889	262.785	2.67857	26.8231		0	152.585	0	0		0	80.531	0	0		0	0.563717	0	0		0	0.61034	0	0
0	204.195	0	0		0	136.13	0	0		0	144.638	0	0		0	93.5892	0	0		7.96272	310.546	2.5641	5.41861		0	263.751	0	0		0	153.146	0	0		0	80.8271	0	0		0.0134712	0.565789	2.38095	0.000278771		0.00638109	0.612584	1.04167	0.000181255
0	204.943	0	0		0	136.628	0	0		0	145.168	0	0		0	93.9321	0	0		0	311.684	0	0		0	264.718	0	0		0	153.707	0	0		0	81.1231	0	0		0	0.567862	0	0		0	0.614828	0	0
0	205.691	0	0		0	137.127	0	0		0	145.697	0	0		0	94.2749	0	0		0	312.821	0	0		0	265.684	0	0		0	154.268	0	0		0	81.4192	0	0		0	0.569934	0	0		0	0.617072	0	0
0	206.439	0	0		0	137.626	0	0		0	146.227	0	0		0	94.6177	0	0		0	313.959	0	0		0	266.65	0	0		0	154.829	0	0		0	81.7153	0	0		0	0.572007	0	0		0	0.619316	0	0
9.4444	207.186	4.5584	34.7084		0	138.124	0	0		0	146.757	0	0		0	94.9605	0	0		0	315.096	0	0		0	267.616	0	0		0	155.39	0	0		0	82.0113	0	0		0.00227809	0.574079	0.396825	5.38538e-05		0	0.62156	0	0
0	207.935	0	0		0	138.623	0	0		0	147.287	0	0		0	95.3033	0	0		0	316.234	0	0		0	268.582	0	0		0	155.951	0	0		0	82.3074	0	0		0	0.576152	0	0		0	0.623803	0	0
0	208.683	0	0		0	139.122	0	0		0	147.817	0	0		5.3679	95.6461	5.61224	22.9479		0	317.371	0	0		0	269.548	0	0		0	156.512	0	0		0	82.6035	0	0		0	0.578224	0	0		0	0.626047	0	0
0	209.43	0	0		0	139.62	0	0		0	148.347	0	0		0	95.989	0	0		4.90014	318.509	1.53846	0.664955		3.62296	270.514	1.33929	7.66028		0	157.073	0	0		0	82.8996	0	0		0.00230277	0.580297	0.396825	5.97556e-05		0.0065447	0.628291	1.04167	0.00022699
0	210.178	0	0		0	140.119	0	0		0	148.876	0	0		0	96.3318	0	0		0	319.646	0	0		0	271.48	0	0		0	157.634	0	0		0	83.1956	0	0		0	0.582369	0	0		0	0.630535	0	0
0	210.926	0	0		0	140.618	0	0		0	149.406	0	0		0	96.6746	0	0		0	320.784	0	0		0	272.447	0	0		0	158.195	0	0		0	83.4917	0	0		0	0.584442	0	0		0	0.632779	0	0
0	211.674	0	0		0	141.116	0	0		0	149.936	0	0		0	97.0174	0	0		0	321.921	0	0		0	273.413	0	0		0	158.756	0	0		0	83.7878	0	0		0	0.586514	0	0		0	0.635023	0	0
0	212.422	0	0		0	141.615	0	0		0	150.466	0	0		0	97.3602	0	0		0	323.059	0	0		0	274.379	0	0		9.95729	159.317	6.25	30.5038		0	84.0838	0	0		0.00700698	0.588587	1.19048	0.000204306		0.0033191	0.637267	0.520833	0.000127716
0	213.17	0	0		0	142.113	0	0		0	150.996	0	0		0	97.703	0	0		0	324.196	0	0		0	275.345	0	0		0	159.878	0	0		0	84.3799	0	0		0	0.590659	0	0		0	0.639511	0	0
0	213.918	0	0		0	142.612	0	0		10.3988	151.525	6.86275	8.43714		0	98.0459	0	0		0	325.334	0	0		0	276.311	0	0		0	160.439	0	0		0	84.676	0	0		0	0.592732	0	0		0	0.641755	0	0
12.2317	214.666	5.69801	23.0528		10.2222	143.111	7.14286	1.5532		0	152.055	0	0		0	98.3887	0	0		5.02264	326.471	1.53846	0.0296541		0	277.277	0	0		0	161	0	0		0	84.972	0	0		0	0.594804	0	0		0.00335416	0.643999	0.520833	0.000138933
0	215.414	0	0		0	143.609	0	0		0	152.585	0	0		0	98.7315	0	0		0	327.609	0	0		4.96863	278.243	1.78571	4.67882		0	161.561	0	0		0	85.2681	0	0		0.00710567	0.596877	1.19048	0.000230981		0	0.646243	0	0
0	216.162	0	0		0	144.108	0	0		0	153.115	0	0		0	99.0743	0	0		0	328.747	0	0		0	279.209	0	0		0	162.122	0	0		0	85.5642	0	0		0	0.598949	0	0		0	0.648486	0	0
0	216.91	0	0		0	144.607	0	0		0	153.645	0	0		0	99.4171	0	0		0	329.884	0	0		0	280.175	0	0		0	162.683	0	0		0	85.8602	0	0		0	0.601022	0	0		0	0.65073	0	0
0	217.658	0	0		0	145.105	0	0		0	154.174	0	0		0	99.7599	0	0		0	331.022	0	0		0	281.142	0	0		0	163.244	0	0		0	86.1563	0	0		0	0.603094	0	0		0.00340091	0.652974	0.520833	0.000154623
0	218.406	0	0		0	145.604	0	0		0	154.704	0	0		0	100.103	0	0		0	332.159	0	0		0	282.108	0	0		0	163.804	0	0		0	86.4524	0	0		0.00240146	0.605167	0.396825	8.6431e-05		0	0.655218	0	0
0	219.154	0	0		0	146.103	0	0		0	155.234	0	0		0	100.446	0	0		0	333.297	0	0		0	283.074	0	0		0	164.365	0	0		0	86.7485	0	0		0	0.607239	0	0		0	0.657462	0	0
0	219.902	0	0		0	146.601	0	0		0	155.764	0	0		0	100.788	0	0		8.57524	334.434	2.5641	2.24211		0	284.04	0	0		0	164.927	0	0		0	87.0445	0	0		0	0.609312	0	0		0	0.659706	0	0
0	220.65	0	0		0	147.1	0	0		0	156.294	0	0		0	101.131	0	0		0	335.572	0	0		0	285.006	0	0		0	165.488	0	0		0	87.3406	0	0		0	0.611384	0	0		0.00344766	0.66195	0.520833	0.000171152
0	221.398	0	0		0	147.599	0	0		0	156.823	0	0		0	101.474	0	0		0	336.709	0	0		0	285.972	0	0		0	166.048	0	0		9.73741	87.6367	11.1111	21.6678		0.0048687	0.613457	0.793651	0.000192827		0	0.664194	0	0
0	222.146	0	0		0	148.097	0	0		0	157.353	0	0		0	101.817	0	0		0	337.847	0	0		12.8098	286.938	4.46429	2.50563		0	166.609	0	0		0	87.9327	0	0		0	0.615529	0	0		0	0.666438	0	0
11.4305	222.894	5.12821	7.24556		0	148.596	0	0		0	157.883	0	0		0	102.16	0	0		0	338.984	0	0		0	287.904	0	0		7.14873	167.17	4.27632	8.66944		0	88.2288	0	0		0	0.617602	0	0		0.0139309	0.668681	2.08333	0.000736397
0	223.642	0	0		0	149.095	0	0		0	158.413	0	0		0	102.502	0	0		0	340.122	0	0		0	288.871	0	0		0	167.731	0	0		0	88.5249	0	0		0	0.619674	0	0		0	0.670925	0	0
0	224.39	0	0		0	149.593	0	0		0	158.943	0	0		0	102.845	0	0		0	341.259	0	0		0	289.837	0	0		0	168.292	0	0		0	88.8209	0	0		0.009869	0.621747	1.5873	0.000427767		0	0.673169	0	0
0	225.138	0	0		0	150.092	0	0		13.55	159.472	8.49673	30.7863		0	103.188	0	0		8.77941	342.397	2.5641	7.68631		0	290.803	0	0		0	168.853	0	0		0	89.117	0	0		0	0.623819	0	0		0	0.675413	0	0
0	225.886	0	0		0	150.59	0	0		0	160.002	0	0		6.86685	103.531	6.63265	10.0938		0	343.534	0	0		0	291.769	0	0		0	169.414	0	0		0	89.4131	0	0		0	0.625892	0	0		0	0.677657	0	0
0	226.634	0	0		13.2826	151.089	8.79121	0.966183		0	160.532	0	0		0	103.874	0	0		0	344.672	0	0		0	292.735	0	0		0	169.975	0	0		0	89.7092	0	0		0	0.627964	0	0		0	0.679901	0	0
0	227.382	0	0		0	151.588	0	0		0	161.062	0	0		0	104.217	0	0		0	345.81	0	0		0	293.701	0	0		0	170.536	0	0		0	90.0052	0	0		0.00750043	0.630037	1.19048	0.000354046		0	0.682145	0	0
0	228.13	0	0		0	152.086	0	0		0	161.592	0	0		0	104.559	0	0		0	346.947	0	0		17.1012	294.667	5.80357	0.00326702		0	171.097	0	0		0	90.3013	0	0		0	0.632109	0	0		0.0106936	0.684389	1.5625	0.000648437
0	228.877	0	0		0	152.585	0	0		0	162.122	0	0		0	104.902	0	0		0	348.085	0	0		0	295.634	0	0		0	171.658	0	0		0	90.5974	0	0		0	0.634182	0	0		0	0.686633	0	0
0	229.625	0	0		0	153.084	0	0		0	162.651	0	0		0	105.245	0	0		0	349.222	0	0		0	296.6	0	0		0	172.219	0	0		0	90.8934	0	0		0.00252482	0.636254	0.396825	0.000126678		0	0.688877	0	0
0	230.374	0	0		0	153.582	0	0		0	163.181	0	0		0	105.588	0	0		3.59343	350.36	1.02564	6.55286		0	297.566	0	0		0	172.78	0	0		0	91.1895	0	0		0	0.638327	0	0		0	0.69112	0	0
9.87699	231.121	4.2735	0.572079		0	154.081	0	0		0	163.711	0	0		0	105.931	0	0		0	351.497	0	0		0	298.532	0	0		0	173.341	0	0		0	91.4856	0	0		0	0.640399	0	0		0.00722255	0.693364	1.04167	0.000471224
0	231.869	0	0		0	154.58	0	0		0	164.241	0	0		0	106.273	0	0		0	352.635	0	0		0	299.498	0	0		0	173.902	0	0		0	91.7816	0	0		0	0.642471	0	0		0	0.695608	0	0
0	232.617	0	0		0	155.078	0	0		0	164.771	0	0		0	106.616	0	0		0	353.772	0	0		0	300.464	0	0		0	174.463	0	0		0	92.0777	0	0		0.00511543	0.644544	0.793651	0.000277413		0	0.697852	0	0
0	233.365	0	0		0	155.577	0	0		0	165.3	0	0		0	106.959	0	0		0	354.91	0	0		0	301.43	0	0		13.8177	175.024	7.89474	3.21832		0	92.3738	0	0		0	0.646617	0	0		0.00364633	0.700096	0.520833	0.000250762
0	234.113	0	0		0	156.076	0	0		0	165.83	0	0		0	107.302	0	0		0	356.047	0	0		6.74992	302.396	2.23214	1.41651		0	175.585	0	0		0	92.6698	0	0		0	0.648689	0	0		0	0.70234	0	0
0	234.861	0	0		0	156.574	0	0		0	166.36	0	0		0	107.645	0	0		0	357.185	0	0		0	303.363	0	0		0	176.146	0	0		0	92.9659	0	0		0	0.650761	0	0		0	0.704584	0	0
0	235.609	0	0		0	157.073	0	0		0	166.89	0	0		0	107.988	0	0		11.0253	358.322	3.07692	33.9953		0	304.329	0	0		0	176.707	0	0		0	93.262	0	0		0.00777183	0.652834	1.19048	0.000453839		0	0.706828	0	0
0	236.357	0	0		0	157.571	0	0		12.5838	167.42	7.51634	54.7218		0	108.33	0	0		0	359.46	0	0		0	305.295	0	0		0	177.268	0	0		0	93.558	0	0		0	0.654906	0	0		0.00369308	0.709072	0.520833	0.000271697
0	237.105	0	0		0	158.07	0	0		0	167.95	0	0		0	108.673	0	0		0	360.597	0	0		0	306.261	0	0		0	177.829	0	0		0	93.8541	0	0		0	0.656979	0	0		0	0.711315	0	0
0	237.853	0	0		0	158.569	0	0		0	168.479	0	0		0	109.016	0	0		0	361.735	0	0		0	307.227	0	0		0	178.39	0	0		0	94.1502	0	0		0	0.659051	0	0		0	0.713559	0	0
9.51685	238.601	3.9886	0.582284		10.488	159.067	6.59341	8.40939		0	169.009	0	0		0	109.359	0	0		0	362.873	0	0		0	308.193	0	0		0	178.951	0	0		0	94.4463	0	0		0.00524702	0.661124	0.793651	0.000328797		0.00745629	0.715803	1.04167	0.000575897
0	239.349	0	0		0	159.566	0	0		0	169.539	0	0		0	109.702	0	0		0	364.01	0	0		0	309.159	0	0		0	179.512	0	0		0	94.7423	0	0		0	0.663196	0	0		0	0.718047	0	0
0	240.097	0	0		0	160.065	0	0		0	170.069	0	0		0	110.044	0	0		0	365.148	0	0		11.0759	310.125	3.57143	8.79779		0	180.073	0	0		0	95.0384	0	0		0	0.665269	0	0		0	0.720291	0	0
0	240.845	0	0		0	160.563	0	0		0	170.599	0	0		0	110.387	0	0		16.9055	366.285	4.61538	78.3508		0	311.091	0	0		0	180.634	0	0		0	95.3345	0	0		0	0.667341	0	0		0	0.722535	0	0
0	241.593	0	0		0	161.062	0	0		0	171.128	0	0		0	110.73	0	0		0	367.423	0	0		0	312.058	0	0		0	181.195	0	0		11.5111	95.6305	12.037	4.29116		0.00531281	0.669414	0.793651	0.000356126		0	0.724779	0	0
0	242.341	0	0		0	161.561	0	0		0	171.658	0	0		0	111.073	0	0		0	368.56	0	0		0	313.024	0	0		0	181.756	0	0		0	95.9266	0	0		0	0.671486	0	0		0	0.727023	0	0
0	243.089	0	0		0	162.059	0	0		0	172.188	0	0		7.38982	111.416	6.63265	1.31428		0	369.698	0	0		0	313.99	0	0		0	182.317	0	0		0	96.2227	0	0		0	0.673559	0	0		0	0.729267	0	0
0	243.837	0	0		0	162.558	0	0		0	172.718	0	0		0	111.759	0	0		0	370.835	0	0		0	314.956	0	0		16.2424	182.878	8.88158	0.19164		0	96.5188	0	0		0	0.675631	0	0		0	0.731511	0	0
0	244.585	0	0		0	163.057	0	0		0	173.248	0	0		0	112.101	0	0		0	371.973	0	0		0	315.922	0	0		0	183.439	0	0		0	96.8148	0	0		0.0026893	0.677704	0.396825	0.000192273		0	0.733754	0	0
0	245.333	0	0		0	163.555	0	0		0	173.777	0	0		0	112.444	0	0		0	373.11	0	0		0	316.888	0	0		0	184	0	0		0	97.1109	0	0		0	0.679776	0	0		0	0.735998	0	0
0	246.081	0	0		0	164.054	0	0		0	174.307	0	0		0	112.787	0	0		7.67688	374.248	2.05128	49.5828		0	317.854	0	0		0	184.561	0	0		0	97.407	0	0		0	0.681849	0	0		0	0.738242	0	0
14.4159	246.829	5.84046	8.47827		0	164.553	0	0		0	174.837	0	0		0	113.13	0	0		0	375.385	0	0		2.84661	318.82	0.892857	5.31147		0	185.121	0	0		0	97.703	0	0		0.00814192	0.683921	1.19048	0.000609863		0.0115701	0.740486	1.5625	0.00105473
0	247.577	0	0		0	165.051	0	0		8.59641	175.367	4.90196	59.8066		0	113.473	0	0		0	376.523	0	0		0	319.786	0	0		0	185.683	0	0		0	97.9991	0	0		0	0.685994	0	0		0	0.74273	0	0
0	248.325	0	0		0	165.55	0	0		0	175.897	0	0		0	113.816	0	0		0	377.66	0	0		0	320.753	0	0		0	186.244	0	0		0	98.2952	0	0		0	0.688066	0	0		0	0.744974	0	0
0	249.073	0	0		0	166.048	0	0		0	176.426	0	0		0	114.158	0	0		0	378.798	0	0		0	321.719	0	0		0	186.804	0	0		0	98.5913	0	0		0	0.690139	0	0		0	0.747218	0	0
0	249.821	0	0		0	166.547	0	0		0	176.956	0	0		0	114.501	0	0		0	379.935	0	0		0	322.685	0	0		0	187.365	0	0		0	98.8873	0	0		0.00274687	0.692211	0.396825	0.000218452		0.00390345	0.749462	0.520833	0.000376288
0	250.569	0	0		15.6032	167.046	9.34066	34.6913		0	177.486	0	0		0	114.844	0	0		0	381.073	0	0		0	323.651	0	0		0	187.926	0	0		0	99.1834	0	0		0	0.694284	0	0		0	0.751706	0	0
0	251.316	0	0		0	167.544	0	0		0	178.016	0	0		0	115.187	0	0		5.88016	382.211	1.53846	50.2082		0	324.617	0	0		0	188.487	0	0		0	99.4794	0	0		0	0.696356	0	0		0	0.75395	0	0
0	252.065	0	0		0	168.043	0	0		0	178.546	0	0		0	115.53	0	0		0	383.348	0	0		0	325.583	0	0		0	189.048	0	0		0	99.7755	0	0		0	0.698429	0	0		0.00393851	0.756193	0.520833	0.000395372
0	252.812	0	0		0	168.542	0	0		0	179.076	0	0		0	115.872	0	0		0	384.486	0	0		8.74686	326.549	2.67857	27.6334		0	189.609	0	0		0	100.072	0	0		0.00555953	0.700501	0.793651	0.000468323		0	0.758437	0	0
0	253.56	0	0		0	169.04	0	0		0	179.605	0	0		0	116.215	0	0		0	385.623	0	0		0	327.515	0	0		0	190.17	0	0		0	100.368	0	0		0	0.702574	0	0		0	0.760681	0	0
0	254.308	0	0		0	169.539	0	0		0	180.135	0	0		0	116.558	0	0		0	386.761	0	0		0	328.482	0	0		0	190.731	0	0		0	100.664	0	0		0	0.704646	0	0		0	0.762925	0	0
9.80986	255.056	3.84615	15.8122		0	170.038	0	0		0	180.665	0	0		0	116.901	0	0		0	387.898	0	0		0	329.448	0	0		15.7313	191.292	8.22368	8.03322		0	100.96	0	0		0	0.706719	0	0		0.015941	0.765169	2.08333	0.00168621
0	255.804	0	0		0	170.536	0	0		0	181.195	0	0		0	117.244	0	0		0	389.036	0	0		0	330.414	0	0		0	191.853	0	0		0	101.256	0	0		0.0112507	0.708791	1.5873	0.00100167		0	0.767413	0	0
0	256.552	0	0		0	171.035	0	0		0	181.725	0	0		0	117.587	0	0		10.0044	390.173	2.5641	108.634		0	331.38	0	0		0	192.414	0	0		0	101.552	0	0		0	0.710864	0	0		0	0.769657	0	0
0	257.3	0	0		0	171.534	0	0		0	182.254	0	0		0	117.929	0	0		0	391.311	0	0		0	332.346	0	0		0	192.975	0	0		0	101.848	0	0		0	0.712936	0	0		0	0.771901	0	0
0	258.048	0	0		0	172.032	0	0		0	182.784	0	0		0	118.272	0	0		0	392.448	0	0		0	333.312	0	0		0	193.536	0	0		0	102.144	0	0		0	0.715009	0	0		0	0.774145	0	0
0	258.796	0	0		0	172.531	0	0		8.38691	183.314	4.57516	84.1095		0	118.615	0	0		0	393.586	0	0		8.95388	334.278	2.67857	42.5326		0	194.097	0	0		0	102.44	0	0		0.00569112	0.717081	0.793651	0.000534434		0	0.776389	0	0
0	259.544	0	0		0	173.029	0	0		0	183.844	0	0		0	118.958	0	0		0	394.723	0	0		0	335.245	0	0		0	194.658	0	0		0	102.736	0	0		0	0.719154	0	0		0	0.778632	0	0
0	260.292	0	0		0	173.528	0	0		0	184.374	0	0		9.73882	119.301	8.16327	0.962336		0	395.861	0	0		0	336.211	0	0		0	195.219	0	0		0	103.032	0	0		0	0.721226	0	0		0.00813413	0.780876	1.04167	0.00093877
0	261.04	0	0		0	174.027	0	0		0	184.903	0	0		0	119.643	0	0		0	396.998	0	0		0	337.177	0	0		0	195.78	0	0		0	103.328	0	0		0	0.723298	0	0		0	0.78312	0	0
0	261.788	0	0		0	174.525	0	0		0	185.433	0	0		0	119.986	0	0		16.3338	398.136	4.10256	218.942		0	338.143	0	0		0	196.341	0	0		7.67588	103.624	7.40741	0.303186		0.00863537	0.725371	1.19048	0.000853688		0	0.785364	0	0
11.5935	262.536	4.41595	34.0196		16.3484	175.024	9.34066	69.3606		0	185.963	0	0		0	120.329	0	0		0	399.274	0	0		0	339.109	0	0		0	196.902	0	0		0	103.921	0	0		0	0.727444	0	0		0	0.787608	0	0
0	263.284	0	0		0	175.523	0	0		0	186.493	0	0		0	120.672	0	0		0	400.411	0	0		0	340.075	0	0		0	197.463	0	0		0	104.217	0	0		0	0.729516	0	0		0	0.789852	0	0
0	264.032	0	0		0	176.021	0	0		0	187.023	0	0		0	121.015	0	0		0	401.549	0	0		0	341.041	0	0		0	198.024	0	0		0	104.513	0	0		0.00290313	0.731588	0.396825	0.00029793		0	0.792096	0	0
0	264.78	0	0		0	176.52	0	0		0	187.552	0	0		0	121.358	0	0		0	402.686	0	0		9.16091	342.007	2.67857	60.6318		0	198.585	0	0		0	104.809	0	0		0	0.733661	0	0		0	0.79434	0	0
0	265.528	0	0		0	177.019	0	0		0	188.082	0	0		0	121.7	0	0		0	403.824	0	0		0	342.974	0	0		13.7568	199.146	6.90789	21.7326		0	105.105	0	0		0	0.735734	0	0		0	0.796584	0	0
0	266.276	0	0		0	177.517	0	0		0	188.612	0	0		0	122.043	0	0		0	404.961	0	0		0	343.94	0	0		0	199.707	0	0		0	105.401	0	0		0	0.737806	0	0		0	0.798828	0	0
0	267.024	0	0		0	178.016	0	0		0	189.142	0	0		0	122.386	0	0		18.743	406.099	4.61538	302.932		0	344.906	0	0		0	200.268	0	0		0	105.697	0	0		0	0.739878	0	0		0	0.801071	0	0
0	267.772	0	0		0	178.514	0	0		0	189.672	0	0		0	122.729	0	0		0	407.236	0	0		0	345.872	0	0		0	200.829	0	0		0	105.993	0	0		0	0.741951	0	0		0	0.803315	0	0
0	268.52	0	0		0	179.013	0	0		0	190.202	0	0		0	123.072	0	0		0	408.374	0	0		0	346.838	0	0		0	201.39	0	0		0	106.289	0	0		0	0.744023	0	0		0	0.805559	0	0
0	269.268	0	0		0	179.512	0	0		0	190.731	0	0		0	123.414	0	0		0	409.511	0	0		0	347.804	0	0		0	201.951	0	0		0	106.585	0	0		0	0.746096	0	0		0	0.807803	0	0
0	270.016	0	0		0	180.011	0	0		8.75051	191.261	4.57516	118.178		0	123.757	0	0		0	410.649	0	0		0	348.77	0	0		0	202.512	0	0		0	106.881	0	0		0.00296892	0.748168	0.396825	0.000335076		0	0.810047	0	0
13.8853	270.764	5.12821	66.4		0	180.509	0	0		0	191.791	0	0		0	124.1	0	0		0	411.786	0	0		0	349.736	0	0		0	203.073	0	0		0	107.177	0	0		0	0.750241	0	0		0.00846137	0.812291	1.04167	0.00114552
0	271.512	0	0		0	181.008	0	0		0	192.321	0	0		0	124.443	0	0		0	412.924	0	0		15.6564	350.702	4.46429	141.365		0	203.634	0	0		0	107.473	0	0		0	0.752313	0	0		0	0.814535	0	0
0	272.26	0	0		0	181.506	0	0		0	192.851	0	0		0	124.786	0	0		6.37018	414.061	1.53846	121.802		0	351.669	0	0		0	204.195	0	0		0	107.769	0	0		0	0.754386	0	0		0	0.816779	0	0
0	273.007	0	0		0	182.005	0	0		0	193.38	0	0		0	125.129	0	0		0	415.199	0	0		0	352.635	0	0		0	204.756	0	0		0	108.066	0	0		0.00300182	0.756458	0.396825	0.000354468		0	0.819023	0	0
0	273.755	0	0		0	182.504	0	0		0	193.91	0	0		0	125.471	0	0		0	416.337	0	0		0	353.601	0	0		0	205.317	0	0		0	108.362	0	0		0	0.758531	0	0		0	0.821267	0	0
0	274.503	0	0		15.0826	183.002	8.24176	102.283		0	194.44	0	0		0	125.814	0	0		0	417.474	0	0		0	354.567	0	0		0	205.878	0	0		0	108.658	0	0		0	0.760603	0	0		0	0.82351	0	0
0	275.251	0	0		0	183.501	0	0		0	194.97	0	0		0	126.157	0	0		0	418.611	0	0		0	355.533	0	0		0	206.439	0	0		0	108.954	0	0		0	0.762676	0	0		0	0.825754	0	0
0	275.999	0	0		0	184	0	0		0	195.5	0	0		0	126.5	0	0		0	419.749	0	0		0	356.499	0	0		16.3421	207	7.89474	51.7014		0	109.25	0	0		0.00910414	0.764748	1.19048	0.00112321		0.00431249	0.827998	0.520833	0.000628305
0	276.747	0	0		0	184.498	0	0		0	196.029	0	0		0	126.843	0	0		0	420.887	0	0		0	357.465	0	0		0	207.56	0	0		0	109.546	0	0		0	0.766821	0	0		0	0.830242	0	0
0	277.495	0	0		0	184.997	0	0		0	196.559	0	0		0	127.185	0	0		2.16423	422.024	0.512821	48.1926		9.60084	358.431	2.67857	109.719		0	208.121	0	0		0	109.842	0	0		0	0.768893	0	0		0	0.832486	0	0
0	278.243	0	0		0	185.495	0	0		0	197.089	0	0		18.2183	127.528	14.2857	19.4258		0	423.162	0	0		0	359.398	0	0		0	208.683	0	0		0	110.138	0	0		0	0.770966	0	0		0	0.83473	0	0
15.4995	278.991	5.55556	108.589		0	185.994	0	0		0	197.619	0	0		0	127.871	0	0		0	424.299	0	0		0	360.364	0	0		0	209.244	0	0		0	110.434	0	0		0.00306761	0.773038	0.396825	0.000394886		0.00435924	0.836974	0.520833	0.000661198
0	279.739	0	0		0	186.493	0	0		0	198.149	0	0		0	128.214	0	0		0	425.437	0	0		0	361.33	0	0		0	209.804	0	0		0	110.73	0	0		0	0.775111	0	0		0	0.839218	0	0
0	280.487	0	0		0	186.992	0	0		0	198.678	0	0		0	128.557	0	0		0	426.574	0	0		0	362.296	0	0		0	210.365	0	0		0	111.026	0	0		0	0.777183	0	0		0	0.841462	0	0
0	281.235	0	0		0	187.49	0	0		5.20806	199.208	2.61438	90.3005		0	128.899	0	0		0	427.712	0	0		0	363.262	0	0		0	210.926	0	0		0	111.322	0	0		0	0.779256	0	0		0.0043943	0.843705	0.520833	0.000686418
0	281.983	0	0		0	187.989	0	0		0	199.738	0	0		0	129.242	0	0		0	428.849	0	0		0	364.228	0	0		0	211.487	0	0		15.5025	111.618	13.8889	13.9362		0.00620102	0.781328	0.793651	0.000831827		0	0.845949	0	0
0	282.731	0	0		0	188.487	0	0		0	200.268	0	0		0	129.585	0	0		15.4354	429.987	3.58974	395.043		0	365.194	0	0		0	212.048	0	0		0	111.914	0	0		0	0.783401	0	0		0	0.848193	0	0
0	283.479	0	0		0	188.986	0	0		0	200.798	0	0		0	129.928	0	0		0	431.124	0	0		14.7118	366.16	4.01786	206.728		0	212.609	0	0		0	112.21	0	0		0	0.785473	0	0		0	0.850437	0	0
0	284.227	0	0		0	189.485	0	0		0	201.327	0	0		0	130.271	0	0		0	432.262	0	0		0	367.127	0	0		0	213.17	0	0		0	112.507	0	0		0	0.787546	0	0		0.00444105	0.852681	0.520833	0.00072078
0	284.975	0	0		0	189.983	0	0		0	201.857	0	0		0	130.613	0	0		0	433.399	0	0		0	368.093	0	0		0	213.731	0	0		0	112.803	0	0		0	0.789618	0	0		0	0.854925	0	0
0	285.723	0	0		0	190.482	0	0		0	202.387	0	0		0	130.956	0	0		0	434.537	0	0		0	369.059	0	0		0	214.292	0	0		0	113.099	0	0		0	0.791691	0	0		0	0.857169	0	0
14.2827	286.471	4.98576	133.215		11.5428	190.981	6.04396	112.83		0	202.917	0	0		0	131.299	0	0		0	435.675	0	0		0	370.025	0	0		17.6688	214.853	8.22368	91.9843		0	113.395	0	0		0	0.793763	0	0		0	0.859413	0	0
0	287.219	0	0		0	191.479	0	0		0	203.447	0	0		0	131.642	0	0		0	436.812	0	0		0	370.991	0	0		0	215.414	0	0		0	113.691	0	0		0.00315808	0.795836	0.396825	0.000454024		0	0.861657	0	0
0	287.967	0	0		0	191.978	0	0		0	203.976	0	0		0	131.985	0	0		13.4754	437.95	3.07692	391.964		0	371.957	0	0		0	215.975	0	0		0	113.987	0	0		0	0.797908	0	0		0	0.863901	0	0
0	288.715	0	0		0	192.476	0	0		0	204.506	0	0		0	132.328	0	0		0	439.087	0	0		0	372.923	0	0		0	216.536	0	0		0	114.283	0	0		0	0.799981	0	0		0	0.866144	0	0
0	289.463	0	0		0	192.975	0	0		0	205.036	0	0		0	132.67	0	0		0	440.225	0	0		11.684	373.889	3.125	197.305		0	217.097	0	0		0	114.579	0	0		0	0.802053	0	0		0	0.868388	0	0
0	290.211	0	0		0	193.474	0	0		0	205.566	0	0		0	133.013	0	0		0	441.362	0	0		0	374.856	0	0		0	217.658	0	0		0	114.875	0	0		0.00319097	0.804126	0.396825	0.000476552		0	0.870632	0	0
0	290.959	0	0		0	193.972	0	0		0	206.096	0	0		0	133.356	0	0		0	442.5	0	0		0	375.822	0	0		0	218.219	0	0		0	115.171	0	0		0	0.806198	0	0		0	0.872876	0	0
0	291.707	0	0		0	194.471	0	0		0	206.626	0	0		0	133.699	0	0		0	443.637	0	0		0	376.788	0	0		0	218.78	0	0		0	115.467	0	0		0	0.808271	0	0		0	0.87512	0	0
0	292.455	0	0		0	194.97	0	0		6.0928	207.155	2.94118	130.92		0	134.042	0	0		0	444.775	0	0		0	377.754	0	0		0	219.341	0	0		0	115.763	0	0		0	0.810343	0	0		0	0.877364	0	0
0	293.203	0	0		0	195.468	0	0		0	207.685	0	0		0	134.385	0	0		6.86019	445.912	1.53846	224.611		0	378.72	0	0		0	219.902	0	0		0	116.059	0	0		0	0.812416	0	0		0	0.879608	0	0
0	293.951	0	0		0	195.967	0	0		0	208.215	0	0		0	134.727	0	0		0	447.05	0	0		0	379.686	0	0		0	220.463	0	0		0	116.355	0	0		0	0.814488	0	0		0	0.881852	0	0
14.2731	294.699	4.8433	173.884		0	196.466	0	0		0	208.745	0	0		0	135.07	0	0		0	448.187	0	0		0	380.652	0	0		0	221.024	0	0		0	116.651	0	0		0	0.816561	0	0		0.00460467	0.884096	0.520833	0.000847654
0	295.447	0	0		0	196.964	0	0		0	209.275	0	0		16.5812	135.413	12.2449	46.7805		0	449.325	0	0		0	381.618	0	0		0	221.585	0	0		0	116.948	0	0		0	0.818633	0	0		0	0.886339	0	0
0	296.195	0	0		0	197.463	0	0		0	209.804	0	0		0	135.756	0	0		0	450.462	0	0		5.1239	382.584	1.33929	104.078		0	222.146	0	0		0	117.244	0	0		0.00325677	0.820705	0.396825	0.000523243		0	0.888583	0	0
0	296.942	0	0		0	197.962	0	0		0	210.334	0	0		0	136.099	0	0		0	451.6	0	0		0	383.551	0	0		7.32588	222.707	3.28947	56.1028		0	117.54	0	0		0	0.822778	0	0		0.00463973	0.890827	0.520833	0.000876179
0	297.69	0	0		0	198.46	0	0		0	210.864	0	0		0	136.441	0	0		0	452.738	0	0		0	384.517	0	0		0	223.268	0	0		0	117.836	0	0		0	0.82485	0	0		0	0.893071	0	0
0	298.438	0	0		7.65227	198.959	3.84615	100.765		0	211.394	0	0		0	136.784	0	0		11.6378	453.875	2.5641	425.317		0	385.483	0	0		0	223.829	0	0		0	118.132	0	0		0	0.826923	0	0		0	0.895315	0	0
0	299.186	0	0		0	199.458	0	0		0	211.924	0	0		0	137.127	0	0		0	455.012	0	0		0	386.449	0	0		0	224.39	0	0		0	118.428	0	0		0	0.828995	0	0		0	0.897559	0	0
0	299.934	0	0		0	199.956	0	0		0	212.453	0	0		0	137.47	0	0		0	456.15	0	0		0	387.415	0	0		0	224.951	0	0		0	118.724	0	0		0	0.831068	0	0		0.00468647	0.899803	0.520833	0.000914946
0	300.682	0	0		0	200.455	0	0		0	212.983	0	0		0	137.813	0	0		0	457.288	0	0		0	388.381	0	0		0	225.512	0	0		0	119.02	0	0		0	0.83314	0	0		0	0.902047	0	0
0	301.43	0	0		0	200.953	0	0		0	213.513	0	0		0	138.155	0	0		0	458.425	0	0		0	389.347	0	0		0	226.073	0	0		20.9908	119.316	17.5926	55.2082		0	0.835213	0	0		0	0.904291	0	0
0	302.178	0	0		0	201.452	0	0		0	214.043	0	0		0	138.498	0	0		0	459.563	0	0		22.6521	390.313	5.80357	533.558		0	226.634	0	0		0	119.612	0	0		0	0.837285	0	0		0	0.906535	0	0
12.514	302.926	4.13105	191.841		0	201.951	0	0		0	214.573	0	0		0	138.841	0	0		0	460.7	0	0		0	391.28	0	0		0	227.195	0	0		0	119.908	0	0		0	0.839358	0	0		0.00473322	0.908779	0.520833	0.000954553
0	303.674	0	0		0	202.449	0	0		2.10885	215.102	0.980392	54.6555		0	139.184	0	0		7.1052	461.838	1.53846	287.72		0	392.246	0	0		0	227.756	0	0		0	120.204	0	0		0	0.84143	0	0		0	0.911022	0	0
0	304.422	0	0		0	202.948	0	0		0	215.632	0	0		0	139.527	0	0		0	462.975	0	0		0	393.212	0	0		0	228.317	0	0		0	120.5	0	0		0	0.843503	0	0		0	0.913266	0	0
0	305.17	0	0		0	203.447	0	0		0	216.162	0	0		0	139.87	0	0		0	464.113	0	0		0	394.178	0	0		0	228.877	0	0		0	120.796	0	0		0	0.845575	0	0		0	0.91551	0	0
0	305.918	0	0		0	203.945	0	0		0	216.692	0	0		0	140.212	0	0		0	465.25	0	0		0	395.144	0	0		0	229.439	0	0		0	121.093	0	0		0	0.847648	0	0		0	0.917754	0	0
0	306.666	0	0		0	204.444	0	0		0	217.222	0	0		0	140.555	0	0		0	466.388	0	0		0	396.11	0	0		0	230	0	0		0	121.389	0	0		0	0.84972	0	0		0	0.919998	0	0
0	307.414	0	0		0	204.943	0	0		0	217.752	0	0		0	140.898	0	0		0	467.525	0	0		0	397.076	0	0		0	230.56	0	0		0	121.685	0	0		0	0.851793	0	0		0	0.922242	0	0
0	308.162	0	0		0	205.441	0	0		0	218.281	0	0		0	141.241	0	0		0	468.663	0	0		10.6619	398.043	2.67857	287.559		9.88349	231.121	4.27632	105.683		0	121.981	0	0		0	0.853865	0	0		0.00481503	0.924486	0.520833	0.00102588
0	308.91	0	0		0	205.94	0	0		0	218.811	0	0		0	141.584	0	0		2.40923	469.8	0.512821	107.4		0	399.009	0	0		0	231.682	0	0		0	122.277	0	0		0	0.855938	0	0		0	0.92673	0	0
0	309.658	0	0		0	206.439	0	0		0	219.341	0	0		0	141.927	0	0		0	470.938	0	0		0	399.975	0	0		0	232.243	0	0		0	122.573	0	0		0	0.85801	0	0		0	0.928974	0	0
9.72782	310.406	3.1339	179.235		5.68509	206.937	2.74725	96.1619		0	219.871	0	0		0	142.269	0	0		0	472.075	0	0		0	400.941	0	0		0	232.804	0	0		0	122.869	0	0		0	0.860083	0	0		0.00485009	0.931218	0.520833	0.00105724
0	311.154	0	0		0	207.436	0	0		0	220.401	0	0		0	142.612	0	0		0	473.213	0	0		0	401.907	0	0		0	233.365	0	0		0	123.165	0	0		0	0.862155	0	0		0	0.933461	0	0
0	311.902	0	0		0	207.935	0	0		0	220.93	0	0		0	142.955	0	0		0	474.351	0	0		0	402.873	0	0		0	233.926	0	0		0	123.461	0	0		0	0.864228	0	0		0	0.935705	0	0
0	312.65	0	0		0	208.433	0	0		0	221.46	0	0		17.5467	143.298	12.2449	92.1356		0	475.488	0	0		0	403.839	0	0		0	234.487	0	0		0	123.757	0	0		0	0.8663	0	0		0	0.937949	0	0
0	313.398	0	0		0	208.932	0	0		0	221.99	0	0		0	143.641	0	0		0	476.626	0	0		0	404.805	0	0		0	235.048	0	0		0	124.053	0	0		0.00344592	0.868373	0.396825	0.000669632		0	0.940193	0	0
0	314.146	0	0		0	209.43	0	0		0	222.52	0	0		0	143.983	0	0		4.90014	477.763	1.02564	239.089		10.8689	405.772	2.67857	332.06		0	235.609	0	0		0	124.349	0	0		0	0.870445	0	0		0	0.942437	0	0
0	314.894	0	0		0	209.929	0	0		4.37352	223.05	1.96078	133.819		0	144.326	0	0		0	478.901	0	0		0	406.738	0	0		0	236.17	0	0		0	124.645	0	0		0	0.872518	0	0		0	0.944681	0	0
0	315.642	0	0		0	210.428	0	0		0	223.579	0	0		0	144.669	0	0		0	480.038	0	0		0	407.704	0	0		0	236.731	0	0		0	124.942	0	0		0	0.87459	0	0		0.0049319	0.946925	0.520833	0.00113224
0	316.39	0	0		0	210.926	0	0		0	224.109	0	0		0	145.012	0	0		0	481.176	0	0		0	408.67	0	0		0	237.292	0	0		0	125.237	0	0		0	0.876663	0	0		0	0.949169	0	0
0	317.137	0	0		0	211.425	0	0		0	224.639	0	0		0	145.355	0	0		0	482.313	0	0		0	409.636	0	0		0	237.853	0	0		0	125.534	0	0		0	0.878735	0	0		0	0.951413	0	0
0	317.885	0	0		0	211.924	0	0		0	225.169	0	0		0	145.697	0	0		0	483.451	0	0		0	410.602	0	0		0	238.414	0	0		0	125.83	0	0		0	0.880808	0	0		0	0.953657	0	0
3.63115	318.633	1.1396	80.1293		0	212.422	0	0		0	225.699	0	0		0	146.04	0	0		0	484.588	0	0		0	411.568	0	0		5.50272	238.975	2.30263	76.3065		0	126.126	0	0		0.00350349	0.88288	0.396825	0.000717765		0	0.9559	0	0
0	319.381	0	0		0	212.921	0	0		0	226.228	0	0		0	146.383	0	0		9.96361	485.726	2.05128	529.356		0	412.534	0	0		0	239.536	0	0		0	126.422	0	0		0	0.884953	0	0		0	0.958144	0	0
0	320.129	0	0		0	213.42	0	0		0	226.758	0	0		0	146.726	0	0		0	486.863	0	0		0	413.5	0	0		0	240.097	0	0		0	126.718	0	0		0	0.887025	0	0		0	0.960388	0	0
0	320.877	0	0		0	213.918	0	0		0	227.288	0	0		0	147.069	0	0		0	488.001	0	0		12.9521	414.466	3.125	450.273		0	240.658	0	0		0	127.014	0	0		0	0.889098	0	0		0	0.962632	0	0
0	321.625	0	0		0	214.417	0	0		0	227.818	0	0		0	147.412	0	0		0	489.139	0	0		0	415.433	0	0		0	241.219	0	0		15.3244	127.31	12.037	79.5574		0	0.89117	0	0		0	0.964876	0	0
0	322.373	0	0		2.36171	214.916	1.0989	49.5383		0	228.348	0	0		0	147.754	0	0		0	490.276	0	0		0	416.399	0	0		0	241.78	0	0		0	127.606	0	0		0	0.893243	0	0		0	0.96712	0	0
0	323.121	0	0		0	215.414	0	0		0	228.877	0	0		0	148.097	0	0		0	491.413	0	0		0	417.365	0	0		0	242.341	0	0		0	127.902	0	0		0	0.895315	0	0		0	0.969364	0	0
0	323.869	0	0		0	215.913	0	0		0	229.407	0	0		0	148.44	0	0		0	492.551	0	0		0	418.331	0	0		0	242.902	0	0		0	128.198	0	0		0	0.897388	0	0		0	0.971608	0	0
0	324.617	0	0		0	216.411	0	0		0	229.937	0	0		0	148.783	0	0		5.06347	493.689	1.02564	291.567		0	419.297	0	0		0	243.463	0	0		0	128.494	0	0		0	0.89946	0	0		0	0.973852	0	0
0	325.365	0	0		0	216.91	0	0		0	230.467	0	0		0	149.126	0	0		0	494.826	0	0		0	420.263	0	0		0	244.024	0	0		0	128.79	0	0		0	0.901533	0	0		0	0.976095	0	0
6.03913	326.113	1.85185	154.476		0	217.409	0	0		2.26467	230.997	0.980392	80.4018		0	149.469	0	0		0	495.964	0	0		0	421.229	0	0		0	244.585	0	0		0	129.086	0	0		0	0.903605	0	0		0.00509552	0.978339	0.520833	0.00128996
0	326.861	0	0		0	217.907	0	0		0	231.527	0	0		0	149.811	0	0		0	497.101	0	0		13.1936	422.195	3.125	510.125		0	245.146	0	0		0	129.382	0	0		0	0.905678	0	0		0	0.980583	0	0
0	327.609	0	0		0	218.406	0	0		0	232.056	0	0		0	150.154	0	0		0	498.239	0	0		0	423.162	0	0		0	245.707	0	0		0	129.679	0	0		0.00360218	0.90775	0.396825	0.000804164		0	0.982827	0	0
0	328.357	0	0		0	218.905	0	0		0	232.586	0	0		0	150.497	0	0		0	499.376	0	0		0	424.128	0	0		0	246.268	0	0		0	129.975	0	0		0	0.909822	0	0		0	0.985071	0	0
0	329.105	0	0		0	219.403	0	0		0	233.116	0	0		0	150.84	0	0		0	500.514	0	0		0	425.094	0	0		7.30743	246.829	2.96053	126.704		0	130.271	0	0		0	0.911895	0	0		0	0.987315	0	0
0	329.853	0	0		0	219.902	0	0		0	233.646	0	0		11.5701	151.183	7.65306	95.4476		0	501.651	0	0		0	426.06	0	0		0	247.39	0	0		0	130.567	0	0		0	0.913968	0	0		0	0.989559	0	0
0	330.601	0	0		0	220.401	0	0		0	234.176	0	0		0	151.525	0	0		0	502.789	0	0		0	427.026	0	0		0	247.951	0	0		0	130.863	0	0		0.00363508	0.91604	0.396825	0.000834055		0	0.991803	0	0
0	331.349	0	0		0	220.899	0	0		0	234.706	0	0		0	151.868	0	0		0	503.926	0	0		0	427.992	0	0		0	248.512	0	0		0	131.159	0	0		0	0.918112	0	0		0	0.994047	0	0
0	332.097	0	0		0	221.398	0	0		0	235.235	0	0		0	152.211	0	0		0	505.064	0	0		0	428.958	0	0		0	249.073	0	0		0	131.455	0	0		0	0.920185	0	0		0.00518901	0.99629	0.520833	0.00138469
0	332.845	0	0		0	221.897	0	0		0	235.765	0	0		0	152.554	0	0		0	506.201	0	0		1.91931	429.925	0.446429	81.9586		0	249.634	0	0		0	131.751	0	0		0	0.922257	0	0		0	0.998534	0	0
0	333.593	0	0		0	222.395	0	0		0	236.295	0	0		0	152.897	0	0		0	507.339	0	0		0	430.891	0	0		0	250.195	0	0		0	132.047	0	0		0	0.92433	0	0		0	1.00078	0	0
3.81015	334.341	1.1396	112.96		0	222.894	0	0		0	236.825	0	0		0	153.239	0	0		0	508.476	0	0		0	431.857	0	0		0	250.756	0	0		0	132.343	0	0		0	0.926402	0	0		0.00522407	1.00302	0.520833	0.00142108
0	335.089	0	0		0	223.393	0	0		0	237.355	0	0		0	153.582	0	0		0	509.614	0	0		0	432.823	0	0		0	251.316	0	0		0	132.639	0	0		0	0.928475	0	0		0	1.00527	0	0
0	335.837	0	0		0	223.891	0	0		0	237.884	0	0		0	153.925	0	0		0	510.752	0	0		0	433.789	0	0		0	251.877	0	0		0	132.935	0	0		0	0.930547	0	0		0	1.00751	0	0
0	336.585	0	0		0	224.39	0	0		0	238.414	0	0		0	154.268	0	0		0	511.889	0	0		0	434.755	0	0		0	252.439	0	0		0	133.231	0	0		0	0.93262	0	0		0	1.00975	0	0
0	337.333	0	0		0	224.888	0	0		3.12345	238.944	1.30719	126.843		0	154.611	0	0		0	513.027	0	0		0	435.721	0	0		0	253	0	0		0	133.528	0	0		0	0.934692	0	0		0	1.012	0	0
0	338.081	0	0		0	225.387	0	0		0	239.474	0	0		0	154.954	0	0		0	514.164	0	0		0	436.687	0	0		0	253.56	0	0		0	133.824	0	0		0	0.936765	0	0		0	1.01424	0	0
0	338.829	0	0		0	225.886	0	0		0	240.004	0	0		0	155.296	0	0		0	515.302	0	0		0	437.654	0	0		0	254.121	0	0		0	134.12	0	0		0	0.938837	0	0		0	1.01649	0	0
0	339.577	0	0		0	226.384	0	0		0	240.533	0	0		0	155.639	0	0		0	516.439	0	0		0	438.62	0	0		3.35108	254.682	1.31579	70.645		0	134.416	0	0		0	0.94091	0	0		0	1.01873	0	0
0	340.325	0	0		0	226.883	0	0		0	241.063	0	0		0	155.982	0	0		0	517.577	0	0		0	439.586	0	0		0	255.243	0	0		0	134.712	0	0		0	0.942982	0	0		0	1.02097	0	0
0	341.072	0	0		0	227.382	0	0		0	241.593	0	0		0	156.325	0	0		0	518.714	0	0		0	440.552	0	0		0	255.804	0	0		0	135.008	0	0		0	0.945055	0	0		0	1.02322	0	0
0	341.82	0	0		0	227.88	0	0		0	242.123	0	0		0	156.668	0	0		0	519.852	0	0		0	441.518	0	0		0	256.365	0	0		7.51688	135.304	5.55556	63.1037		0	0.947127	0	0		0	1.02546	0	0
3.90391	342.568	1.1396	132.402		0	228.379	0	0		0	242.653	0	0		0	157.011	0	0		0	520.989	0	0		0	442.484	0	0		0	256.926	0	0		0	135.6	0	0		0	0.9492	0	0		0.00535263	1.02771	0.520833	0.00155856
0	343.316	0	0		0	228.877	0	0		0	243.182	0	0		0	157.353	0	0		0	522.127	0	0		0	443.45	0	0		0	257.487	0	0		0	135.896	0	0		0	0.951272	0	0		0	1.02995	0	0
0	344.064	0	0		0	229.376	0	0		0	243.712	0	0		0	157.696	0	0		0	523.264	0	0		0	444.416	0	0		0	258.048	0	0		0	136.192	0	0		0	0.953345	0	0		0	1.03219	0	0
0	344.812	0	0		0	229.875	0	0		0	244.242	0	0		0	158.039	0	0		0	524.402	0	0		0	445.382	0	0		0	258.609	0	0		0	136.488	0	0		0.00379134	0.955417	0.396825	0.000983484		0.00538769	1.03444	0.520833	0.00159716
0	345.56	0	0		0	230.374	0	0		0	244.772	0	0		0	158.382	0	0		0	525.539	0	0		0	446.349	0	0		0	259.17	0	0		0	136.784	0	0		0	0.95749	0	0		0	1.03668	0	0
0	346.308	0	0		1.26853	230.872	0.549451	37.9412		0	245.302	0	0		0	158.725	0	0		0	526.677	0	0		0	447.315	0	0		0	259.731	0	0		0	137.08	0	0		0	0.959562	0	0		0	1.03893	0	0
0	347.056	0	0		0	231.371	0	0		0	245.831	0	0		0	159.067	0	0		0	527.814	0	0		0	448.281	0	0		0	260.292	0	0		0	137.376	0	0		0	0.961635	0	0		0	1.04117	0	0
0	347.804	0	0		0	231.869	0	0		0	246.361	0	0		7.31986	159.41	4.59184	87.0611		0	528.952	0	0		0	449.247	0	0		0	260.853	0	0		0	137.673	0	0		0	0.963707	0	0		0	1.04341	0	0
0	348.552	0	0		0	232.368	0	0		0	246.891	0	0		0	159.753	0	0		0	530.09	0	0		0	450.213	0	0		0	261.414	0	0		0	137.969	0	0		0	0.96578	0	0		0	1.04566	0	0
0	349.3	0	0		0	232.867	0	0		0	247.421	0	0		0	160.096	0	0		0	531.227	0	0		0	451.179	0	0		0	261.975	0	0		0	138.265	0	0		0	0.967852	0	0		0	1.0479	0	0
1.49593	350.048	0.427351	56.7806		0	233.365	0	0		0	247.951	0	0		0	160.439	0	0		0	532.365	0	0		0	452.145	0	0		0.863605	262.536	0.328947	21.6501		0	138.561	0	0		0	0.969925	0	0		0.0054695	1.05014	0.520833	0.00168905
0	350.796	0	0		0	233.864	0	0		0	248.481	0	0		0	160.781	0	0		5.47182	533.502	1.02564	445.523		0	453.111	0	0		0	263.097	0	0		0	138.857	0	0		0	0.971997	0	0		0	1.05239	0	0
0	351.544	0	0		0	234.363	0	0		0	249.01	0	0		0	161.124	0	0		0	534.64	0	0		0	454.078	0	0		0	263.658	0	0		0	139.153	0	0		0	0.97407	0	0		0	1.05463	0	0
0	352.292	0	0		0	234.861	0	0		0	249.54	0	0		0	161.467	0	0		0	535.777	0	0		0	455.044	0	0		0	264.219	0	0		0	139.449	0	0		0	0.976142	0	0		0	1.05688	0	0
0	353.04	0	0		0	235.36	0	0		0	250.07	0	0		0	161.81	0	0		0	536.915	0	0		0	456.01	0	0		0	264.78	0	0		0	139.745	0	0		0	0.978215	0	0		0	1.05912	0	0
0	353.788	0	0		0	235.859	0	0		0	250.6	0	0		0	162.153	0	0		0	538.052	0	0		0	456.976	0	0		0	265.341	0	0		0	140.041	0	0		0	0.980287	0	0		0	1.06136	0	0
0	354.536	0	0		0	236.357	0	0		0	251.13	0	0		0	162.496	0	0		0	539.19	0	0		0	457.942	0	0		0	265.902	0	0		0	140.337	0	0		0	0.98236	0	0		0	1.06361	0	0
0	355.284	0	0		0	236.856	0	0		0	251.659	0	0		0	162.838	0	0		0	540.327	0	0		0	458.908	0	0		0	266.463	0	0		0	140.633	0	0		0	0.984432	0	0		0	1.06585	0	0
0	356.032	0	0		0	237.355	0	0		0	252.189	0	0		0	163.181	0	0		0	541.465	0	0		0	459.874	0	0		0	267.024	0	0		0	140.929	0	0		0	0.986505	0	0		0.011126	1.0681	1.04167	0.00359442
0	356.78	0	0		0	237.853	0	0		0	252.719	0	0		0	163.524	0	0		0	542.602	0	0		0	460.84	0	0		0	267.585	0	0		0	141.225	0	0		0	0.988577	0	0		0	1.07034	0	0
0	357.528	0	0		0	238.352	0	0		0	253.249	0	0		0	163.867	0	0		0	543.74	0	0		2.06164	461.807	0.446429	125.066		0	268.146	0	0		0	141.521	0	0		0	0.99065	0	0		0	1.07258	0	0
0.510364	358.276	0.14245	21.7252		0	238.85	0	0		0	253.779	0	0		0	164.21	0	0		0	544.878	0	0		0	462.773	0	0		0	268.707	0	0		0	141.817	0	0		0	0.992722	0	0		0.0167942	1.07483	1.5625	0.00551592
0	359.024	0	0		0	239.349	0	0		0	254.308	0	0		0	164.553	0	0		0	546.015	0	0		0	463.739	0	0		0	269.268	0	0		0	142.113	0	0		0	0.994795	0	0		0	1.07707	0	0
0	359.772	0	0		0	239.848	0	0		0	254.838	0	0		0	164.895	0	0		0	547.153	0	0		0	464.705	0	0		0	269.829	0	0		0	142.41	0	0		0	0.996867	0	0		0	1.07932	0	0
0	360.519	0	0		0	240.346	0	0		0	255.368	0	0		0	165.238	0	0		0	548.29	0	0		0	465.671	0	0		0	270.39	0	0		0	142.706	0	0		0	0.99894	0	0		0	1.08156	0	0
0	361.267	0	0		0	240.845	0	0		0	255.898	0	0		0	165.581	0	0		2.81758	549.428	0.512821	258.105		0	466.637	0	0		2.67386	270.951	0.986842	79.1226		0	143.002	0	0		0	1.00101	0	0		0	1.0838	0	0
0	362.015	0	0		0	241.344	0	0		0	256.428	0	0		0	165.924	0	0		0	550.565	0	0		0	467.603	0	0		0	271.512	0	0		1.32683	143.298	0.925926	16.0981		0	1.00308	0	0		0	1.08605	0	0
0	362.763	0	0		0	241.842	0	0		0	256.957	0	0		0	166.267	0	0		0	551.703	0	0		0	468.569	0	0		0	272.073	0	0		0	143.594	0	0		0	1.00516	0	0		0	1.08829	0	0
0	363.511	0	0		0	242.341	0	0		0	257.487	0	0		0	166.609	0	0		0	552.84	0	0		0	469.536	0	0		0	272.634	0	0		0	143.89	0	0		0	1.00723	0	0		0	1.09053	0	0
0	364.259	0	0		0	242.84	0	0		0	258.017	0	0		0	166.952	0	0		0	553.978	0	0		0	470.502	0	0		0	273.195	0	0		0	144.186	0	0		0	1.0093	0	0		0	1.09278	0	0
0	365.007	0	0		0	243.338	0	0		0	258.547	0	0		0.853546	167.295	0.510204	13.494		0	555.115	0	0		0	471.468	0	0		0	273.755	0	0		0	144.482	0	0		0	1.01137	0	0		0	1.09502	0	0
0	365.755	0	0		0	243.837	0	0		0	259.077	0	0		0	167.638	0	0		0	556.253	0	0		0	472.434	0	0		0	274.317	0	0		0	144.778	0	0		0	1.01345	0	0		0	1.09727	0	0
1.56625	366.503	0.427351	74.1493		0	244.335	0	0		0	259.606	0	0		0	167.981	0	0		5.71682	557.39	1.02564	553.504		0	473.4	0	0		0	274.877	0	0		0	145.074	0	0		0	1.01552	0	0		0.00572662	1.09951	0.520833	0.00199458
0	367.251	0	0		0	244.834	0	0		0	260.136	0	0		0	168.323	0	0		0	558.528	0	0		0	474.366	0	0		0	275.438	0	0		0	145.37	0	0		0	1.01759	0	0		0	1.10175	0	0
0	367.999	0	0		0	245.333	0	0		0	260.666	0	0		0	168.666	0	0		0	559.665	0	0		0	475.332	0	0		0	275.999	0	0		0	145.666	0	0		0	1.01966	0	0		0	1.104	0	0
0	368.747	0	0		0	245.832	0	0		0	261.196	0	0		0	169.009	0	0		0	560.803	0	0		0	476.298	0	0		0	276.56	0	0		0	145.962	0	0		0	1.02174	0	0		0	1.10624	0	0
0	369.495	0	0		0	246.33	0	0		0	261.726	0	0		0	169.352	0	0		0	561.94	0	0		0	477.264	0	0		0	277.121	0	0		0	146.258	0	0		0	1.02381	0	0		0	1.10849	0	0
0	370.243	0	0		0	246.829	0	0		0	262.255	0	0		0	169.695	0	0		0	563.078	0	0		0	478.231	0	0		0	277.682	0	0		0	146.555	0	0		0	1.02588	0	0		0	1.11073	0	0
0	370.991	0	0		0	247.327	0	0		0	262.785	0	0		0	170.038	0	0		0	564.216	0	0		0	479.197	0	0		0	278.243	0	0		0	146.851	0	0		0	1.02795	0	0		0	1.11297	0	0
0	371.739	0	0		0	247.826	0	0		0	263.315	0	0		0	170.38	0	0		0	565.353	0	0		0	480.163	0	0		0.917119	278.804	0.328947	31.2036		0	147.147	0	0		0	1.03003	0	0		0	1.11522	0	0
0	372.487	0	0		0	248.325	0	0		0	263.845	0	0		0	170.723	0	0		0	566.491	0	0		0	481.129	0	0		0	279.365	0	0		0	147.443	0	0		0	1.0321	0	0		0	1.11746	0	0
0	373.235	0	0		0	248.823	0	0		0	264.375	0	0		0	171.066	0	0		0	567.628	0	0		0	482.095	0	0		0	279.926	0	0		0	147.739	0	0		0	1.03417	0	0		0	1.1197	0	0
0.532739	373.983	0.14245	27.6031		0	249.322	0	0		0	264.905	0	0		0	171.409	0	0		0	568.766	0	0		0	483.061	0	0		0	280.487	0	0		0	148.035	0	0		0	1.03624	0	0		0.00584349	1.12195	0.520833	0.00214185
0	374.731	0	0		0	249.821	0	0		0	265.434	0	0		0	171.752	0	0		0	569.903	0	0		0	484.027	0	0		0	281.048	0	0		0	148.331	0	0		0	1.03832	0	0		0	1.12419	0	0
0	375.479	0	0		0	250.319	0	0		0	265.964	0	0		0	172.095	0	0		0	571.041	0	0		0	484.993	0	0		0	281.609	0	0		0	148.627	0	0		0	1.04039	0	0		0	1.12644	0	0
0	376.227	0	0		0	250.818	0	0		0	266.494	0	0		0	172.437	0	0		0	572.178	0	0		0	485.96	0	0		0	282.17	0	0		0	148.923	0	0		0.00413675	1.04246	0.396825	0.00135747		0	1.12868	0	0
0	376.975	0	0		0	251.316	0	0		0	267.024	0	0		0	172.78	0	0		2.94008	573.316	0.512821	315.997		0	486.926	0	0		0	282.731	0	0		0	149.219	0	0		0	1.04453	0	0		0.00589023	1.13092	0.520833	0.00220222
0	377.723	0	0		0	251.815	0	0		0	267.554	0	0		0	173.123	0	0		0	574.453	0	0		0	487.892	0	0		0	283.292	0	0		0	149.515	0	0		0	1.04661	0	0		0	1.13317	0	0
0	378.471	0	0		0	252.314	0	0		0	268.083	0	0		0	173.466	0	0		0	575.591	0	0		0	488.858	0	0		0	283.853	0	0		0	149.811	0	0		0	1.04868	0	0		0	1.13541	0	0
0	379.219	0	0		0	252.812	0	0		0	268.613	0	0		0	173.809	0	0		0	576.728	0	0		0	489.824	0	0		0	284.414	0	0		0	150.107	0	0		0	1.05075	0	0		0	1.13766	0	0
0	379.967	0	0		0	253.311	0	0		0	269.143	0	0		0	174.151	0	0		0	577.866	0	0		0	490.79	0	0		0	284.975	0	0		0	150.404	0	0		0	1.05282	0	0		0	1.1399	0	0
0	380.715	0	0		0	253.81	0	0		0	269.673	0	0		0	174.494	0	0		0	579.004	0	0		0	491.756	0	0		0	285.536	0	0		0	150.7	0	0		0	1.0549	0	0		0	1.14214	0	0
0	381.463	0	0		0	254.308	0	0		0	270.203	0	0		0	174.837	0	0		0	580.141	0	0		0	492.723	0	0		0	286.097	0	0		0	150.996	0	0		0	1.05697	0	0		0	1.14439	0	0
0.544459	382.211	0.14245	30.9625		1.40004	254.807	0.549451	62.9455		1.76949	270.733	0.653595	110.959		0.893775	175.18	0.510204	17.9489		2.98092	581.279	0.512821	336.595		2.20397	493.689	0.446429	177.25		1.88591	286.658	0.657895	72.8775		1.40085	151.292	0.925926	22.8624		0.00420255	1.05904	0.396825	0.00143552		0.0119441	1.14663	1.04167	0.0046198
0			0		0			0		0			0		0			0		0			0		0			0		0			0		0			0		0			0		0			0
0			0		0			0		0			0		0			0		0			0		0			0		0			0		0			0		0			0		0			0
0			0		0			0		0			0		0			0		0			0		0			0		0			0		0			0		0			0		0			0
0			0		0			0		0			0		0			0		0			0		0			0		0			0		0			0		0			0		0			0
0			0		0			0		0			0		0			0		0			0		0			0		0			0		0			0		0			0		0			0
0			0		0			0		0			0		0			0		0			0		0			0		0			0		0			0		0			0		0			0
0			0		0			0		0			0		0			0		0			0		0			0		0			0		0			0		0			0		0			0
0			0		0			0		0			0		0			0		0			0		0			0		0			0		0			0		0			0		0			0
0			0		0			0		0			0		0			0		0			0		0			0		0			0		0			0		0			0		0			0
0			0		0			0		0			0		0			0		0			0		0			0		0			0		0			0		0			0		0			0
0			0		0			0		0			0		0			0		0			0		0			0		0			0		0			0		0			0		0			0
0			0		0			0		0			0		0			0		0			0		0			0		0			0		0			0		0			0		0			0
0			0		0			0		0			0		0			0		0			0		0			0		0			0		0			0		0			0		0			0
0			0		0			0		0			0		0			0		0			0		0			0		0			0		0			0		0			0		0			0
0			0		0			0		0			0		0			0		0			0		0			0		0			0		0			0		0			0		0			0
0			0		0			0		0			0		0			0		0			0		0			0		0			0		0			0		0			0		0			0
0			0		0			0		0			0		0			0		0			0		0			0		0			0		0			0		0			0		0			0
0			0		0			0		0			0		0			0		0			0		0			0		0			0		0			0		0			0		0			0
0			0		0			0		0			0		0			0		0			0		0			0		0			0		0			0		0			0		0			0
0			0		0			0		0			0		0			0		0			0		0			0		0			0		0			0		0			0		0			0
0			0		0			0		0			0		0			0		0			0		0			0		0			0		0			0		0			0		0			0
0			0		0			0		0			0		0			0		0			0		0			0		0			0		0			0		0			0		0			0
0			0		0			0		0			0		0			0		0			0		0			0		0			0		0			0		0			0		0			0
0			0		0			0		0			0		0			0		0			0		0			0		0			0		0			0		0			0		0			0
0			0		0			0		0			0		0			0		0			0		0			0		0			0		0			0		0			0		0			0
0			0		0			0		0			0		0			0		0			0		0			0		0			0		0			0		0			0		0			0
0			0		0			0		0			0		0			0		0			0		0			0		0			0		0			0		0			0		0			0
0			0		0			0		0			0		0			0		0			0		0			0		0			0		0			0		0			0		0			0
0			0		0			0		0			0		0			0		0			0		0			0		0			0		0			0		0			0		0			0
0			0		0			0		0			0		0			0		0			0		0			0		0			0		0			0		0			0		0			0
0			0		0			0		0			0		0			0		0			0		0			0		0			0		0			0		0			0		0			0
0			0		0			0		0			0		0			0		0			0		0			0		0			0		0			0		0			0		0			0
0			0		0			0		0			0		0			0		0			0		0			0		0			0		0			0		0			0		0			0
0			0		0			0		0			0		0			0		0			0		0			0		0			0		0			0		0			0		0			0
0			0		0			0		0			0		0			0		0			0		0			0		0			0		0			0		0			0		0			0
0			0		0			0		0			0		0			0		0			0		0			0		0			0		0			0		0			0		0			0
0			0		0			0		0			0		0			0		0			0		0			0		0			0		0			0		0			0		0			0
0			0		0			0		0			0		0			0		0			0		0			0		0			0		0			0		0			0		0			0
0			0		0			0		0			0		0			0		0			0		0			0		0			0		0			0		0			0		0			0
0			0		0			0		0			0		0			0		0			0		0			0		0			0		0			0		0			0		0			0
0			0		0			0		0			0		0			0		0			0		0			0		0			0		0			0		0			0		0			0
0			0		0			0		0			0		0			0		0			0		0			0		0			0		0			0		0			0		0			0
0			0		0			0		0			0		0			0		0			0		0			0		0			0		0			0		0			0		0			0
0			0		0			0		0			0		0			0		0			0		0			0		0			0		0			0		0			0		0			0
0			0		0			0		0			0		0			0		0			0		0			0		0			0		0			0		0			0		0			0
0			0		0			0		0			0		0			0		0			0		0			0		0			0		0			0		0			0		0			0
0			0		0			0		0			0		0			0		0			0		0			0		0			0		0			0		0			0		0			0
0			0		0			0		0			0		0			0		0			0		0			0		0			0		0			0		0			0		0			0
0			0		0			0		0			0		0			0		0			0		0			0		0			0		0			0		0			0		0			0
0			0		0			0		0			0		0			0		0			0		0			0		0			0		0			0		0			0		0			0
0			0		0			0		0			0		0			0		0			0		0			0		0			0		0			0		0			0		0			0
0			0		0			0		0			0		0			0		0			0		0			0		0			0		0			0		0			0		0			0
0			0		0			0		0			0		0			0		0			0		0			0		0			0		0			0		0			0		0			0
0			0		0			0		0			0		0			0		0			0		0			0		0			0		0			0		0			0		0			0
0			0		0			0		0			0		0			0		0			0		0			0		0			0		0			0		0			0		0			0
0			0		0			0		0			0		0			0		0			0		0			0		0			0		0			0		0			0		0			0
0			0		0			0		0			0		0			0		0			0		0			0		0			0		0			0		0			0		0			0
0			0		0			0		0			0		0			0		0			0		0			0		0			0		0			0		0			0		0			0
0			0		0			0		0			0		0			0		0			0		0			0		0			0		0			0		0			0		0			0
0			0		0			0		0			0		0			0		0			0		0			0		0			0		0			0		0			0		0			0
0			0		0			0		0			0		0			0		0			0		0			0		0			0		0			0		0			0		0			0
0			0		0			0		0			0		0			0		0			0		0			0		0			0		0			0		0			0		0			0
0			0		0			0		0			0		0			0		0			0		0			0		0			0		0			0		0			0		0			0
0			0		0			0		0			0		0			0		0			0		0			0		0			0		0			0		0			0		0			0
0			0		0			0		0			0		0			0		0			0		0			0		0			0		0			0		0			0		0			0
0			0		0			0		0			0		0			0		0			0		0			0		0			0		0			0		0			0		0			0
0			0		0			0		0			0		0			0		0			0		0			0		0			0		0			0		0			0		0			0
0			0		0			0		0			0		0			0		0			0		0			0		0			0		0			0		0			0		0			0
0			0		0			0		0			0		0			0		0			0		0			0		0			0		0			0		0			0		0			0
0			0		0			0		0			0		0			0		0			0		0			0		0			0		0			0		0			0		0			0
0			0		0			0		0			0		0			0		0			0		0			0		0			0		0			0		0			0		0			0
0			0		0			0		0			0		0			0		0			0		0			0		0			0		0			0		0			0		0			0
0			0		0			0		0			0		0			0		0			0		0			0		0			0		0			0		0			0		0			0
0			0		0			0		0			0		0			0		0			0		0			0		0			0		0			0		0			0		0			0
0			0		0			0		0			0		0			0		0			0		0			0		0			0		0			0		0			0		0			0
0			0		0			0		0			0		0			0		0			0		0			0		0			0		0			0		0			0		0			0
0			0		0			0		0			0		0			0		0			0		0			0		0			0		0			0		0			0		0			0
0			0		0			0		0			0		0			0		0			0		0			0		0			0		0			0		0			0		0			0
0			0		0			0		0			0		0			0		0			0		0			0		0			0		0			0		0			0		0			0
0			0		0			0		0			0		0			0		0			0		0			0		0			0		0			0		0			0		0			0
0			0		0			0		0			0		0			0		0			0		0			0		0			0		0			0		0			0		0			0
0			0		0			0		0			0		0			0		0			0		0			0		0			0		0			0		0			0		0			0
0			0		0			0		0			0		0			0		0			0		0			0		0			0		0			0		0			0		0			0
0			0		0			0		0			0		0			0		0			0		0			0		0			0		0			0		0			0		0			0
0			0		0			0		0			0		0			0		0			0		0			0		0			0		0			0		0			0		0			0
0			0		0			0		0			0		0			0		0			0		0			0		0			0		0			0		0			0		0			0
0			0		0			0		0			0		0			0		0			0		0			0		0			0		0			0		0			0		0			0
0			0		0			0		0			0		0			0		0			0		0			0		0			0		0			0		0			0		0			0
0			0		0			0		0			0		0			0		0			0		0			0		0			0		0			0		0			0		0			0
0			0		0			0		0			0		0			0		0			0		0			0		0			0		0			0		0			0		0			0
0			0		0			0		0			0		0			0		0			0		0			0		0			0		0			0		0			0		0			0
0			0		0			0		0			0		0			0		0			0		0			0		0			0		0			0		0			0		0			0
0			0		0			0		0			0		0			0		0			0		0			0		0			0		0			0		0			0		0			0
0			0		0			0		0			0		0			0		0			0		0			0		0			0		0			0		0			0		0			0
0			0		0			0		0			0		0			0		0			0		0			0		0			0		0			0		0			0		0			0
0			0		0			0		0			0		0			0		0			0		0			0		0			0		0			0		0			0		0			0
0			0		0			0		0			0		0			0		0			0		0			0		0			0		0			0		0			0		0			0
0			0		0			0		0			0		0			0		0			0		0			0		0			0		0			0		0			0		0			0
0			0		0			0		0			0		0			0		0			0		0			0		0			0		0			0		0			0		0			0
0			0		0			0		0			0		0			0		0			0		0			0		0			0		0			0		0			0		0			0
0			0		0			0		0			0		0			0		0			0		0			0		0			0		0			0		0			0		0			0
0			0		0			0		0			0		0			0		0			0		0			0		0			0		0			0		0			0		0			0
0			0		0			0		0			0		0			0		0			0		0			0		0			0		0			0		0			0		0			0
0			0		0			0		0			0		0			0		0			0		0			0		0			0		0			0		0			0		0			0
0			0		0			0		0			0		0			0		0			0		0			0		0			0		0			0		0			0		0			0
0			0		0			0		0			0		0			0		0			0		0			0		0			0		0			0		0			0		0			0
0			0		0			0		0			0		0			0		0			0		0			0		0			0		0			0		0			0		0			0
0			0		0			0		0			0		0			0		0			0		0			0		0			0		0			0		0			0		0			0
0			0		0			0		0			0		0			0		0			0		0			0		0			0		0			0		0			0		0			0
0			0		0			0		0			0		0			0		0			0		0			0		0			0		0			0		0			0		0			0
0			0		0			0		0			0		0			0		0			0		0			0		0			0		0			0		0			0		0			0
0			0		0			0		0			0		0			0		0			0		0			0		0			0		0			0		0			0		0			0
0			0		0			0		0			0		0			0		0			0		0			0		0			0		0			0		0			0		0			0
0			0		0			0		0			0		0			0		0			0		0			0		0			0		0			0		0			0		0			0
0			0		0			0		0			0		0			0		0			0		0			0		0			0		0			0		0			0		0			0
0			0		0			0		0			0		0			0		0			0		0			0		0			0		0			0		0			0		0			0
0			0		0			0		0			0		0			0		0			0		0			0		0			0		0			0		0			0		0			0
0			0		0			0		0			0		0			0		0			0		0			0		0			0		0			0		0			0		0			0
0			0		0			0		0			0		0			0		0			0		0			0		0			0		0			0		0			0		0			0
0			0		0			0		0			0		0			0		0			0		0			0		0			0		0			0		0			0		0			0
0			0		0			0		0			0		0			0		0			0		0			0		0			0		0			0		0			0		0			0
0			0		0			0		0			0		0			0		0			0		0			0		0			0		0			0		0			0		0			0
0			0		0			0		0			0		0			0		0			0		0			0		0			0		0			0		0			0		0			0
0			0		0			0		0			0		0			0		0			0		0			0		0			0		0			0		0			0		0			0
0			0		0			0		0			0		0			0		0			0		0			0		0			0		0			0		0			0		0			0
0			0		0			0		0			0		0			0		0			0		0			0		0			0		0			0		0			0		0			0
0			0		0			0		0			0		0			0		0			0		0			0		0			0		0			0		0			0		0			0
0			0		0			0		0			0		0			0		0			0		0			0		0			0		0			0		0			0		0			0
0			0		0			0		0			0		0			0		0			0		0			0		0			0		0			0		0			0		0			0
0			0		0			0		0			0		0			0		0			0		0			0		0			0		0			0		0			0		0			0
0			0		0			0		0			0		0			0		0			0		0			0		0			0		0			0		0			0		0			0
0			0		0			0		0			0		0			0		0			0		0			0		0			0		0			0		0			0		0			0
0			0		0			0		0			0		0			0		0			0		0			0		0			0		0			0		0			0		0			0
0			0		0			0		0			0		0			0		0			0		0			0		0			0		0			0		0			0		0			0
0			0		0			0		0			0		0			0		0			0		0			0		0			0		0			0		0			0		0			0
0			0		0			0		0			0		0			0		0			0		0			0		0			0		0			0		0			0		0			0
0			0		0			0		0			0		0			0		0			0		0			0		0			0		0			0		0			0		0			0
0			0		0			0		0			0		0			0		0			0		0			0		0			0		0			0		0			0		0			0
0			0		0			0		0			0		0			0		0			0		0			0		0			0		0			0		0			0		0			0
0			0		0			0		0			0		0			0		0			0		0			0		0			0		0			0		0			0		0			0
0			0		0			0		0			0		0			0		0			0		0			0		0			0		0			0		0			0		0			0
0			0		0			0		0			0		0			0		0			0		0			0		0			0		0			0		0			0		0			0
0			0		0			0		0			0		0			0		0			0		0			0		0			0		0			0		0			0		0			0
0			0		0			0		0			0		0			0		0			0		0			0		0			0		0			0		0			0		0			0
0			0		0			0		0			0		0			0		0			0		0			0		0			0		0			0		0			0		0			0
0			0		0			0		0			0		0			0		0			0		0			0		0			0		0			0		0			0		0			0
0			0		0			0		0			0		0			0		0			0		0			0		0			0		0			0		0			0		0			0
0			0		0			0		0			0		0			0		0			0		0			0		0			0		0			0		0			0		0			0
0			0		0			0		0			0		0			0		0			0		0			0		0			0		0			0		0			0		0			0
0			0		0			0		0			0		0			0		0			0		0			0		0			0		0			0		0			0		0			0
0			0		0			0		0			0		0			0		0			0		0			0		0			0		0			0		0			0		0			0
0			0		0			0		0			0		0			0		0			0		0			0		0			0		0			0		0			0		0			0
0			0		0			0		0			0		0			0		0			0		0			0		0			0		0			0		0			0		0			0
0			0		0			0		0			0		0			0		0			0		0			0		0			0		0			0		0			0		0			0
0			0		0			0		0			0		0			0		0			0		0			0		0			0		0			0		0			0		0			0
0			0		0			0		0			0		0			0		0			0		0			0		0			0		0			0		0			0		0			0
0			0		0			0		0			0		0			0		0			0		0			0		0			0		0			0		0			0		0			0
0			0		0			0		0			0		0			0		0			0		0			0		0			0		0			0		0			0		0			0
0			0		0			0		0			0		0			0		0			0		0			0		0			0		0			0		0			0		0			0
0			0		0			0		0			0		0			0		0			0		0			0		0			0		0			0		0			0		0			0
0			0		0			0		0			0		0			0		0			0		0			0		0			0		0			0		0			0		0			0
0			0		0			0		0			0		0			0		0			0		0			0		0			0		0			0		0			0		0			0
0			0		0			0		0			0		0			0		0			0		0			0		0			0		0			0		0			0		0			0
0			0		0			0		0			0		0			0		0			0		0			0		0			0		0			0		0			0		0			0
0			0		0			0		0			0		0			0		0			0		0			0		0			0		0			0		0			0		0			0
0			0		0			0		0			0		0			0		0			0		0			0		0			0		0			0		0			0		0			0
0			0		0			0		0			0		0			0		0			0		0			0		0			0		0			0		0			0		0			0
0			0		0			0		0			0		0			0		0			0		0			0		0			0		0			0		0			0		0			0
0			0		0			0		0			0		0			0		0			0		0			0		0			0		0			0		0			0		0			0
0			0		0			0		0			0		0			0		0			0		0			0		0			0		0			0		0			0		0			0
0			0		0			0		0			0		0			0		0			0		0			0		0			0		0			0		0			0		0			0
0			0		0			0		0			0		0			0		0			0		0			0		0			0		0			0		0			0		0			0
0			0		0			0		0			0		0			0		0			0		0			0		0			0		0			0		0			0		0			0
0			0		0			0		0			0		0			0		0			0		0			0		0			0		0			0		0			0		0			0
0			0		0			0		0			0		0			0		0			0		0			0		0			0		0			0		0			0		0			0
0			0		0			0		0			0		0			0		0			0		0			0		0			0		0			0		0			0		0			0
0			0		0			0		0			0		0			0		0			0		0			0		0			0		0			0		0			0		0			0
0			0		0			0		0			0		0			0		0			0		0			0		0			0		0			0		0			0		0			0
0			0		0			0		0			0		0			0		0			0		0			0		0			0		0			0		0			0		0			0
0			0		0			0		0			0		0			0		0			0		0			0		0			0		0			0		0			0		0			0
0			0		0			0		0			0		0			0		0			0		0			0		0			0		0			0		0			0		0			0
0			0		0			0		0			0		0			0		0			0		0			0		0			0		0			0		0			0		0			0
0			0		0			0		0			0		0			0		0			0		0			0		0			0		0			0		0			0		0			0
0			0		0			0		0			0		0			0		0			0		0			0		0			0		0			0		0			0		0			0
0			0		0			0		0			0		0			0		0			0		0			0		0			0		0			0		0			0		0			0
0			0		0			0		0			0		0			0		0			0		0			0		0			0		0			0		0			0		0			0
0			0		0			0		0			0		0			0		0			0		0			0		0			0		0			0		0			0		0			0
0			0		0			0		0			0		0			0		0			0		0			0		0			0		0			0		0			0		0			0
0			0		0			0		0			0		0			0		0			0		0			0		0			0		0			0		0			0		0			0
0			0		0			0		0			0		0			0		0			0		0			0		0			0		0			0		0			0		0			0
0			0		0			0		0			0		0			0		0			0		0			0		0			0		0			0		0			0		0			0
0			0		0			0		0			0		0			0		0			0		0			0		0			0		0			0		0			0		0			0
0			0		0			0		0			0		0			0		0			0		0			0		0			0		0			0		0			0		0			0
0			0		0			0		0			0		0			0		0			0		0			0		0			0		0			0		0			0		0			0
0			0		0			0		0			0		0			0		0			0		0			0		0			0		0			0		0			0		0			0
0			0		0			0		0			0		0			0		0			0		0			0		0			0		0			0		0			0		0			0
0			0		0			0		0			0		0			0		0			0		0			0		0			0		0			0		0			0		0			0
0			0		0			0		0			0		0			0		0			0		0			0		0			0		0			0		0			0		0			0
0			0		0			0		0			0		0			0		0			0		0			0		0			0		0			0		0			0		0			0
0			0		0			0		0			0		0			0		0			0		0			0		0			0		0			0		0			0		0			0
0			0		0			0		0			0		0			0		0			0		0			0		0			0		0			0		0			0		0			0
0			0		0			0		0			0		0			0		0			0		0			0		0			0		0			0		0			0		0			0
0			0		0			0		0			0		0			0		0			0		0			0		0			0		0			0		0			0		0			0
0			0		0			0		0			0		0			0		0			0		0			0		0			0		0			0		0			0		0			0
0			0		0			0		0			0		0			0		0			0		0			0		0			0		0			0		0			0		0			0
0			0		0			0		0			0		0			0		0			0		0			0		0			0		0			0		0			0		0			0
0			0		0			0		0			0		0			0		0			0		0			0		0			0		0			0		0			0		0			0
0			0		0			0		0			0		0			0		0			0		0			0		0			0		0			0		0			0		0			0
0			0		0			0		0			0		0			0		0			0		0			0		0			0		0			0		0			0		0			0
0			0		0			0		0			0		0			0		0			0		0			0		0			0		0			0		0			0		0			0
0			0		0			0		0			0		0			0		0			0		0			0		0			0		0			0		0			0		0			0
0			0		0			0		0			0		0			0		0			0		0			0		0			0		0			0		0			0		0			0
0			0		0			0		0			0		0			0		0			0		0			0		0			0		0			0		0			0		0			0
0			0		0			0		0			0		0			0		0			0		0			0		0			0		0			0		0			0		0			0
0			0		0			0		0			0		0			0		0			0		0			0		0			0		0			0		0			0		0			0
0			0		0			0		0			0		0			0		0			0		0			0		0			0		0			0		0			0		0			0
0			0		0			0		0			0		0			0		0			0		0			0		0			0		0			0		0			0		0			0
0			0		0			0		0			0		0			0		0			0		0			0		0			0		0			0		0			0		0			0
0			0		0			0		0			0		0			0		0			0		0			0		0			0		0			0		0			0		0			0
0			0		0			0		0			0		0			0		0			0		0			0		0			0		0			0		0			0		0			0
0			0		0			0		0			0		0			0		0			0		0			0		0			0		0			0		0			0		0			0
0			0		0			0		0			0		0			0		0			0		0			0		0			0		0			0		0			0		0			0
0			0		0			0		0			0		0			0		0			0		0			0		0			0		0			0		0			0		0			0
0			0		0			0		0			0		0			0		0			0		0			0		0			0		0			0		0			0		0			0
0			0		0			0		0			0		0			0		0			0		0			0		0			0		0			0		0			0		0			0
0			0		0			0		0			0		0			0		0			0		0			0		0			0		0			0		0			0		0			0
0			0		0			0		0			0		0			0		0			0		0			0		0			0		0			0		0			0		0			0
0			0		0			0		0			0		0			0		0			0		0			0		0			0		0			0		0			0		0			0
0			0		0			0		0			0		0			0		0			0		0			0		0			0		0			0		0			0		0			0
0			0		0			0		0			0		0			0		0			0		0			0		0			0		0			0		0			0		0			0
0			0		0			0		0			0		0			0		0			0		0			0		0			0		0			0		0			0		0			0
0			0		0			0		0			0		0			0		0			0		0			0		0			0		0			0		0			0		0			0
0			0		0			0		0			0		0			0		0			0		0			0		0			0		0			0		0			0		0			0
0			0		0			0		0			0		0			0		0			0		0			0		0			0		0			0		0			0		0			0
0			0		0			0		0			0		0			0		0			0		0			0		0			0		0			0		0			0		0			0
0			0		0			0		0			0		0			0		0			0		0			0		0			0		0			0		0			0		0			0
0			0		0			0		0			0		0			0		0			0		0			0		0			0		0			0		0			0		0			0
0			0		0			0		0			0		0			0		0			0		0			0		0			0		0			0		0			0		0			0
0			0		0			0		0			0		0			0		0			0		0			0		0			0		0			0		0			0		0			0
0			0		0			0		0			0		0			0		0			0		0			0		0			0		0			0		0			0		0			0
0			0		0			0		0			0		0			0		0			0		0			0		0			0		0			0		0			0		0			0
0			0		0			0		0			0		0			0		0			0		0			0		0			0		0			0		0			0		0			0
0			0		0			0		0			0		0			0		0			0		0			0		0			0		0			0		0			0		0			0
0			0		0			0		0			0		0			0		0			0		0			0		0			0		0			0		0			0		0			0
0			0		0			0		0			0		0			0		0			0		0			0		0			0		0			0		0			0		0			0
0			0		0			0		0			0		0			0		0			0		0			0		0			0		0			0		0			0		0			0
0			0		0			0		0			0		0			0		0			0		0			0		0			0		0			0		0			0		0			0
0			0		0			0		0			0		0			0		0			0		0			0		0			0		0			0		0			0		0			0
0			0		0			0		0			0		0			0		0			0		0			0		0			0		0			0		0			0		0			0
0			0		0			0		0			0		0			0		0			0		0			0		0			0		0			0		0			0		0			0
0			0		0			0		0			0		0			0		0			0		0			0		0			0		0			0		0			0		0			0
0			0		0			0		0			0		0			0		0			0		0			0		0			0		0			0		0			0		0			0
0			0		0			0		0			0		0			0		0			0		0			0		0			0		0			0		0			0		0			0
0			0		0			0		0			0		0			0		0			0		0			0		0			0		0			0		0			0		0			0
0			0		0			0		0			0		0			0		0			0		0			0		0			0		0			0		0			0		0			0
0			0		0			0		0			0		0			0		0			0		0			0		0			0		0			0		0			0		0			0
0			0		0			0		0			0		0			0		0			0		0			0		0			0		0			0		0			0		0			0
0			0		0			0		0			0		0			0		0			0		0			0		0			0		0			0		0			0		0			0
0			0		0			0		0			0		0			0		0			0		0			0		0			0		0			0		0			0		0			0
0			0		0			0		0			0		0			0		0			0		0			0		0			0		0			0		0			0		0			0
0			0		0			0		0			0		0			0		0			0		0			0		0			0		0			0		0			0		0			0
0			0		0			0		0			0		0			0		0			0		0			0		0			0		0			0		0			0		0			0
0			0		0			0		0			0		0			0		0			0		0			0		0			0		0			0		0			0		0			0
0			0		0			0		0			0		0			0		0			0		0			0		0			0		0			0		0			0		0			0
0			0		0			0		0			0		0			0		0			0		0			0		0			0		0			0		0			0		0			0
0			0		0			0		0			0		0			0		0			0		0			0		0			0		0			0		0			0		0			0
0			0		0			0		0			0		0			0		0			0		0			0		0			0		0			0		0			0		0			0
0			0		0			0		0			0		0			0		0			0		0			0		0			0		0			0		0			0		0			0
0			0		0			0		0			0		0			0		0			0		0			0		0			0		0			0		0			0		0			0
0			0		0			0		0			0		0			0		0			0		0			0		0			0		0			0		0			0		0			0
0			0		0			0		0			0		0			0		0			0		0			0		0			0		0			0		0			0		0			0
0			0		0			0		0			0		0			0		0			0		0			0		0			0		0			0		0			0		0			0
0			0		0			0		0			0		0			0		0			0		0			0		0			0		0			0		0			0		0			0
0			0		0			0		0			0		0			0		0			0		0			0		0			0		0			0		0			0		0			0
0			0		0			0		0			0		0			0		0			0		0			0		0			0		0			0		0			0		0			0
0			0		0			0		0			0		0			0		0			0		0			0		0			0		0			0		0			0		0			0
0			0		0			0		0			0		0			0		0			0		0			0		0			0		0			0		0			0		0			0
0			0		0			0		0			0		0			0		0			0		0			0		0			0		0			0		0			0		0			0
0			0		0			0		0			0		0			0		0			0		0			0		0			0		0			0		0			0		0			0
0			0		0			0		0			0		0			0		0			0		0			0		0			0		0			0		0			0		0			0
0			0		0			0		0			0		0			0		0			0		0			0		0			0		0			0		0			0		0			0
0			0		0			0		0			0		0			0		0			0		0			0		0			0		0			0		0			0		0			0
0			0		0			0		0			0		0			0		0			0		0			0		0			0		0			0		0			0		0			0
0			0		0			0		0			0		0			0		0			0		0			0		0			0		0			0		0			0		0			0
0			0		0			0		0			0		0			0		0			0		0			0		0			0		0			0		0			0		0			0
0			0		0			0		0			0		0			0		0			0		0			0		0			0		0			0		0			0		0			0
0			0		0			0		0			0		0			0		0			0		0			0		0			0		0			0		0			0		0			0
0			0		0			0		0			0		0			0		0			0		0			0		0			0		0			0		0			0		0			0
0			0		0			0		0			0		0			0		0			0		0			0		0			0		0			0		0			0		0			0
0			0		0			0		0			0		0			0		0			0		0			0		0			0		0			0		0			0		0			0
0			0		0			0		0			0		0			0		0			0		0			0		0			0		0			0		0			0		0			0
0			0		0			0		0			0		0			0		0			0		0			0		0			0		0			0		0			0		0			0
0			0		0			0		0			0		0			0		0			0		0			0		0			0		0			0		0			0		0			0
0			0		0			0		0			0		0			0		0			0		0			0		0			0		0			0		0			0		0			0
0			0		0			0		0			0		0			0		0			0		0			0		0			0		0			0		0			0		0			0
0			0		0			0		0			0		0			0		0			0		0			0		0			0		0			0		0			0		0			0
0			0		0			0		0			0		0			0		0			0		0			0		0			0		0			0		0			0		0			0
0			0		0			0		0			0		0			0		0			0		0			0		0			0		0			0		0			0		0			0
0			0		0			0		0			0		0			0		0			0		0			0		0			0		0			0		0			0		0			0
0			0		0			0		0			0		0			0		0			0		0			0		0			0		0			0		0			0		0			0
0			0		0			0		0			0		0			0		0			0		0			0		0			0		0			0		0			0		0			0
0			0		0			0		0			0		0			0		0			0		0			0		0			0		0			0		0			0		0			0
0			0		0			0		0			0		0			0		0			0		0			0		0			0		0			0		0			0		0			0
0			0		0			0		0			0		0			0		0			0		0			0		0			0		0			0		0			0		0			0
0			0		0			0		0			0		0			0		0			0		0			0		0			0		0			0		0			0		0			0
0			0		0			0		0			0		0			0		0			0		0			0		0			0		0			0		0			0		0			0
0			0		0			0		0			0		0			0		0			0		0			0		0			0		0			0		0			0		0			0
0			0		0			0		0			0		0			0		0			0		0			0		0			0		0			0		0			0		0			0
0			0		0			0		0			0		0			0		0			0		0			0		0			0		0			0		0			0		0			0
0			0		0			0		0			0		0			0		0			0		0			0		0			0		0			0		0			0		0			0
0			0		0			0		0			0		0			0		0			0		0			0		0			0		0			0		0			0		0			0
0			0		0			0		0			0		0			0		0			0		0			0		0			0		0			0		0			0		0			0
0			0		0			0		0			0		0			0		0			0		0			0		0			0		0			0		0			0		0			0
0			0		0			0		0			0		0			0		0			0		0			0		0			0		0			0		0			0		0			0
0			0		0			0		0			0		0			0		0			0		0			0		0			0		0			0		0			0		0			0
0			0		0			0		0			0		0			0		0			0		0			0		0			0		0			0		0			0		0			0
0			0		0			0		0			0		0			0		0			0		0			0		0			0		0			0		0			0		0			0
0			0		0			0		0			0		0			0		0			0		0			0		0			0		0			0		0			0		0			0
0			0		0			0		0			0		0			0		0			0		0			0		0			0		0			0		0			0		0			0
0			0		0			0		0			0		0			0		0			0		0			0		0			0		0			0		0			0		0			0
0			0		0			0		0			0		0			0		0			0		0			0		0			0		0			0		0			0		0			0
0			0		0			0		0			0		0			0		0			0		0			0		0			0		0			0		0			0		0			0
0			0		0			0		0			0		0			0		0			0		0			0		0			0		0			0		0			0		0			0
0			0		0			0		0			0		0			0		0			0		0			0		0			0		0			0		0			0		0			0
0			0		0			0		0			0		0			0		0			0		0			0		0			0		0			0		0			0		0			0
0			0		0			0		0			0		0			0		0			0		0			0		0			0		0			0		0			0		0			0
0			0		0			0		0			0		0			0		0			0		0			0		0			0		0			0		0			0		0			0
0			0		0			0		0			0		0			0		0			0		0			0		0			0		0			0		0			0		0			0
0			0		0			0		0			0		0			0		0			0		0			0		0			0		0			0		0			0		0			0
0			0		0			0		0			0		0			0		0			0		0			0		0			0		0			0		0			0		0			0
0			0		0			0		0			0		0			0		0			0		0			0		0			0		0			0		0			0		0			0
0			0		0			0		0			0		0			0		0			0		0			0		0			0		0			0		0			0		0			0
0			0		0			0		0			0		0			0		0			0		0			0		0			0		0			0		0			0		0			0
0			0		0			0		0			0		0			0		0			0		0			0		0			0		0			0		0			0		0			0
0			0		0			0		0			0		0			0		0			0		0			0		0			0		0			0		0			0		0			0
0			0		0			0		0			0		0			0		0			0		0			0		0			0		0			0		0			0		0			0
0			0		0			0		0			0		0			0		0			0		0			0		0			0		0			0		0			0		0			0
0			0		0			0		0			0		0			0		0			0		0			0		0			0		0			0		0			0		0			0
0			0		0			0		0			0		0			0		0			0		0			0		0			0		0			0		0			0		0			0
0			0		0			0		0			0		0			0		0			0		0			0		0			0		0			0		0			0		0			0
0			0		0			0		0			0		0			0		0			0		0			0		0			0		0			0		0			0		0			0
0			0		0			0		0			0		0			0		0			0		0			0		0			0		0			0		0			0		0			0
0			0		0			0		0			0		0			0		0			0		0			0		0			0		0			0		0			0		0			0
0			0		0			0		0			0		0			0		0			0		0			0		0			0		0			0		0			0		0			0
0			0		0			0		0			0		0			0		0			0		0			0		0			0		0			0		0			0		0			0
0			0		0			0		0			0		0			0		0			0		0			0		0			0		0			0		0			0		0			0
0			0		0			0		0			0		0			0		0			0		0			0		0			0		0			0		0			0		0			0
0			0		0			0		0			0		0			0		0			0		0			0		0			0		0			0		0			0		0			0
0			0		0			0		0			0		0			0		0			0		0			0		0			0		0			0		0			0		0			0
0			0		0			0		0			0		0			0		0			0		0			0		0			0		0			0		0			0		0			0
0			0		0			0		0			0		0			0		0			0		0			0		0			0		0			0		0			0		0			0
0			0		0			0		0			0		0			0		0			0		0			0		0			0		0			0		0			0		0			0
0			0		0			0		0			0		0			0		0			0		0			0		0			0		0			0		0			0		0			0
0			0		0			0		0			0		0			0		0			0		0			0		0			0		0			0		0			0		0			0
0			0		0			0		0			0		0			0		0			0		0			0		0			0		0			0		0			0		0			0
0			0		0			0		0			0		0			0		0			0		0			0		0			0		0			0		0			0		0			0
0			0		0			0		0			0		0			0		0			0		0			0		0			0		0			0		0			0		0			0
0			0		0			0		0			0		0			0		0			0		0			0		0			0		0			0		0			0		0			0
0			0		0			0		0			0		0			0		0			0		0			0		0			0		0			0		0			0		0			0
0			0		0			0		0			0		0			0		0			0		0			0		0			0		0			0		0			0		0			0
0			0		0			0		0			0		0			0		0			0		0			0		0			0		0			0		0			0		0			0
0			0		0			0		0			0		0			0		0			0		0			0		0			0		0			0		0			0		0			0
0			0		0			0		0			0		0			0		0			0		0			0		0			0		0			0		0			0		0			0
0			0		0			0		0			0		0			0		0			0		0			0		0			0		0			0		0			0		0			0
0			0		0			0		0			0		0			0		0			0		0			0		0			0		0			0		0			0		0			0
0			0		0			0		0			0		0			0		0			0		0			0		0			0		0			0		0			0		0			0
0			0		0			0		0			0		0			0		0			0		0			0		0			0		0			0		0			0		0			0
0			0		0			0		0			0		0			0		0			0		0			0		0			0		0			0		0			0		0			0
0			0		0			0		0			0		0			0		0			0		0			0		0			0		0			0		0			0		0			0
0			0		0			0		0			0		0			0		0			0		0			0		0			0		0			0		0			0		0			0
0			0		0			0		0			0		0			0		0			0		0			0		0			0		0			0		0			0		0			0
0			0		0			0		0			0		0			0		0			0		0			0		0			0		0			0		0			0		0			0
0			0		0			0		0			0		0			0		0			0		0			0		0			0		0			0		0			0		0			0
0			0		0			0		0			0		0			0		0			0		0			0		0			0		0			0		0			0		0			0
0			0		0			0		0			0		0			0		0			0		0			0		0			0		0			0		0			0		0			0
0			0		0			0		0			0		0			0		0			0		0			0		0			0		0			0		0			0		0			0
0			0		0			0		0			0		0			0		0			0		0			0		0			0		0			0		0			0		0			0
0			0		0			0		0			0		0			0		0			0		0			0		0			0		0			0		0			0		0			0
0			0		0			0		0			0		0			0		0			0		0			0		0			0		0			0		0			0		0			0
0			0		0			0		0			0		0			0		0			0		0			0		0			0		0			0		0			0		0			0
0			0		0			0		0			0		0			0		0			0		0			0		0			0		0			0		0			0		0			0
0			0		0			0		0			0		0			0		0			0		0			0		0			0		0			0		0			0		0			0
0			0		0			0		0			0		0			0		0			0		0			0		0			0		0			0		0			0		0			0
0			0		0			0		0			0		0			0		0			0		0			0		0			0		0			0		0			0		0			0
0			0		0			0		0			0		0			0		0			0		0			0		0			0		0			0		0			0		0			0
0			0		0			0		0			0		0			0		0			0		0			0		0			0		0			0		0			0		0			0
0			0		0			0		0			0		0			0		0			0		0			0		0			0		0			0		0			0		0			0
0			0		0			0		0			0		0			0		0			0		0			0		0			0		0			0		0			0		0			0
0			0		0			0		0			0		0			0		0			0		0			0		0			0		0			0		0			0		0			0
0			0		0			0		0			0		0			0		0			0		0			0		0			0		0			0		0			0		0			0
0			0		0			0		0			0		0			0		0			0		0			0		0			0		0			0		0			0		0			0
0			0		0			0		0			0		0			0		0			0		0			0		0			0		0			0		0			0		0			0
0			0		0			0		0			0		0			0		0			0		0			0		0			0		0			0		0			0		0			0
0			0		0			0		0			0		0			0		0			0		0			0		0			0		0			0		0			0		0			0
0			0		0			0		0			0		0			0		0			0		0			0		0			0		0			0		0			0		0			0
0			0		0			0		0			0		0			0		0			0		0			0		0			0		0			0		0			0		0			0
0			0		0			0		0			0		0			0		0			0		0			0		0			0		0			0		0			0		0			0
0			0		0			0		0			0		0			0		0			0		0			0		0			0		0			0		0			0		0			0
0			0		0			0		0			0		0			0		0			0		0			0		0			0		0			0		0			0		0			0
0			0		0			0		0			0		0			0		0			0		0			0		0			0		0			0		0			0		0			0
0			0		0			0		0			0		0			0		0			0		0			0		0			0		0			0		0			0		0			0
0			0		0			0		0			0		0			0		0			0		0			0		0			0		0			0		0			0		0			0
0			0		0			0		0			0		0			0		0			0		0			0		0			0		0			0		0			0		0			0
0			0		0			0		0			0		0			0		0			0		0			0		0			0		0			0		0			0		0			0
0			0		0			0		0			0		0			0		0			0		0			0		0			0		0			0		0			0		0			0
0			0		0			0		0			0		0			0		0			0		0			0		0			0		0			0		0			0		0			0
0			0		0			0		0			0		0			0		0			0		0			0		0			0		0			0		0			0		0			0
0			0		0			0		0			0		0			0		0			0		0			0		0			0		0			0		0			0		0			0
0			0		0			0		0			0		0			0		0			0		0			0		0			0		0			0		0			0		0			0
0			0		0			0		0			0		0			0		0			0		0			0		0			0		0			0		0			0		0			0
0			0		0			0		0			0		0			0		0			0		0			0		0			0		0			0		0			0		0			0
0			0		0			0		0			0		0			0		0			0		0			0		0			0		0			0		0			0		0			0
0			0		0			0		0			0		0			0		0			0		0			0		0			0		0			0		0			0		0			0
0			0		0			0		0			0		0			0		0			0		0			0		0			0		0			0		0			0		0			0
0			0		0			0		0			0		0			0		0			0		0			0		0			0		0			0		0			0		0			0
0			0		0			0		0			0		0			0		0			0		0			0		0			0		0			0		0			0		0			0
0			0		0			0		0			0		0			0		0			0		0			0		0			0		0			0		0			0		0			0
0			0		0			0		0			0		0			0		0			0		0			0		0			0		0			0		0			0		0			0
0			0		0			0		0			0		0			0		0			0		0			0		0			0		0			0		0			0		0			0
0			0		0			0		0			0		0			0		0			0		0			0		0			0		0			0		0			0		0			0
0			0		0			0		0			0		0			0		0			0		0			0		0			0		0			0		0			0		0			0
0			0		0			0		0			0		0			0		0			0		0			0		0			0		0			0		0			0		0			0
0			0		0			0		0			0		0			0		0			0		0			0		0			0		0			0		0			0		0			0
0			0		0			0		0			0		0			0		0			0		0			0		0			0		0			0		0			0		0			0
0			0		0			0		0			0		0			0		0			0		0			0		0			0		0			0		0			0		0			0
0			0		0			0		0			0		0			0		0			0		0			0		0			0		0			0		0			0		0			0
0			0		0			0		0			0		0			0		0			0		0			0		0			0		0			0		0			0		0			0
0			0		0			0		0			0		0			0		0			0		0			0		0			0		0			0		0			0		0			0
0			0		0			0		0			0		0			0		0			0		0			0		0			0		0			0		0			0		0			0
0			0		0			0		0			0		0			0		0			0		0			0		0			0		0			0		0			0		0			0
0			0		0			0		0			0		0			0		0			0		0			0		0			0		0			0		0			0		0			0
0			0		0			0		0			0		0			0		0			0		0			0		0			0		0			0		0			0		0			0
0			0		0			0		0			0		0			0		0			0		0			0		0			0		0			0		0			0		0			0
0			0		0			0		0			0		0			0		0			0		0			0		0			0		0			0		0			0		0			0
0			0		0			0		0			0		0			0		0			0		0			0		0			0		0			0		0			0		0			0
0			0		0			0		0			0		0			0		0			0		0			0		0			0		0			0		0			0		0			0
0			0		0			0		0			0		0			0		0			0		0			0		0			0		0			0		0			0		0			0
0			0		0			0		0			0		0			0		0			0		0			0		0			0		0			0		0			0		0			0
0			0		0			0		0			0		0			0		0			0		0			0		0			0		0			0		0			0		0			0
0			0		0			0		0			0		0			0		0			0		0			0		0			0		0			0		0			0		0			0
0			0		0			0		0			0		0			0		0			0		0			0		0			0		0			0		0			0		0			0
0			0		0			0		0			0		0			0		0			0		0			0		0			0		0			0		0			0		0			0
0			0		0			0		0			0		0			0		0			0		0			0		0			0		0			0		0			0		0			0
0			0		0			0		0			0		0			0		0			0		0			0		0			0		0			0		0			0		0			0
0			0		0			0		0			0		0			0		0			0		0			0		0			0		0			0		0			0		0			0
0			0		0			0		0			0		0			0		0			0		0			0		0			0		0			0		0			0		0			0
0			0		0			0		0			0		0			0		0			0		0			0		0			0		0			0		0			0		0			0
0			0		0			0		0			0		0			0		0			0		0			0		0			0		0			0		0			0		0			0
0			0		0			0		0			0		0			0		0			0		0			0		0			0		0			0		0			0		0			0
0			0		0			0		0			0		0			0		0			0		0			0		0			0		0			0		0			0		0			0
0			0		0			0		0			0		0			0		0			0		0			0		0			0		0			0		0			0		0			0
0			0		0			0		0			0		0			0		0			0		0			0		0			0		0			0		0			0		0			0
0			0		0			0		0			0		0			0		0			0		0			0		0			0		0			0		0			0		0			0
0			0		0			0		0			0		0			0		0			0		0			0		0			0		0			0		0			0		0			0
0			0		0			0		0			0		0			0		0			0		0			0		0			0		0			0		0			0		0			0
0			0		0			0		0			0		0			0		0			0		0			0		0			0		0			0		0			0		0			0
0			0		0			0		0			0		0			0		0			0		0			0		0			0		0			0		0			0		0			0
0			0		0			0		0			0		0			0		0			0		0			0		0			0		0			0		0			0		0			0
0			0		0			0		0			0		0			0		0			0		0			0		0			0		0			0		0			0		0			0
0			0		0			0		0			0		0			0		0			0		0			0		0			0		0			0		0			0		0			0
0			0		0			0		0			0		0			0		0			0		0			0		0			0		0			0		0			0		0			0
0			0		0			0		0			0		0			0		0			0		0			0		0			0		0			0		0			0		0			0
0			0		0			0		0			0		0			0		0			0		0			0		0			0		0			0		0			0		0			0
0			0		0			0		0			0		0			0		0			0		0			0		0			0		0			0		0			0		0			0
0			0		0			0		0			0		0			0		0			0		0			0		0			0		0			0		0			0		0			0
0			0		0			0		0			0		0			0		0			0		0			0		0			0		0			0		0			0		0			0
0			0		0			0		0			0		0			0		0			0		0			0		0			0		0			0		0			0		0			0
0			0		0			0		0			0		0			0		0			0		0			0		0			0		0			0		0			0		0			0
0			0		0			0		0			0		0			0		0			0		0			0		0			0		0			0		0			0		0			0
0			0		0			0		0			0		0			0		0			0		0			0		0			0		0			0		0			0		0			0
0			0		0			0		0			0		0			0		0			0		0			0		0			0		0			0		0			0		0			0
0			0		0			0		0			0		0			0		0			0		0			0		0			0		0			0		0			0		0			0
0			0		0			0		0			0		0			0		0			0		0			0		0			0		0			0		0			0		0			0
0			0		0			0		0			0		0			0		0			0		0			0		0			0		0			0		0			0		0			0
0			0		0			0		0			0		0			0		0			0		0			0		0			0		0			0		0			0		0			0
0			0		0			0		0			0		0			0		0			0		0			0		0			0		0			0		0			0		0			0
0			0		0			0		0			0		0			0		0			0		0			0		0			0		0			0		0			0		0			0
0			0		0			0		0			0		0			0		0			0		0			0		0			0		0			0		0			0		0			0
0			0		0			0		0			0		0			0		0			0		0			0		0			0		0			0		0			0		0			0
0			0		0			0		0			0		0			0		0			0		0			0		0			0		0			0		0			0		0			0
0			0		0			0		0			0		0			0		0			0		0			0		0			0		0			0		0			0		0			0
0			0		0			0		0			0		0			0		0			0		0			0		0			0		0			0		0			0		0			0
0			0		0			0		0			0		0			0		0			0		0			0		0			0		0			0		0			0		0			0
0			0		0			0		0			0		0			0		0			0		0			0		0			0		0			0		0			0		0			0
0			0		0			0		0			0		0			0		0			0		0			0		0			0		0			0		0			0		0			0
0			0		0			0		0			0		0			0		0			0		0			0		0			0		0			0		0			0		0			0
0			0		0			0		0			0		0			0		0			0		0			0		0			0		0			0		0			0		0			0
0			0		0			0		0			0		0			0		0			0		0			0		0			0		0			0		0			0		0			0
0			0		0			0		0			0		0			0		0			0		0			0		0			0		0			0		0			0		0			0
0			0		0			0		0			0		0			0		0			0		0			0		0			0		0			0		0			0		0			0
0			0		0			0		0			0		0			0		0			0		0			0		0			0		0			0		0			0		0			0
0			0		0			0		0			0		0			0		0			0		0			0		0			0		0			0		0			0		0			0
0			0		0			0		0			0		0			0		0			0		0			0		0			0		0			0		0			0		0			0
0			0		0			0		0			0		0			0		0			0		0			0		0			0		0			0		0			0		0			0
0			0		0			0		0			0		0			0		0			0		0			0		0			0		0			0		0			0		0			0
0			0		0			0		0			0		0			0		0			0		0			0		0			0		0			0		0			0		0			0
0			0		0			0		0			0		0			0		0			0		0			0		0			0		0			0		0			0		0			0
0			0		0			0		0			0		0			0		0			0		0			0		0			0		0			0		0			0		0			0
0			0		0			0		0			0		0			0		0			0		0			0		0			0		0			0		0			0		0			0
0			0		0			0		0			0		0			0		0			0		0			0		0			0		0			0		0			0		0			0
0			0		0			0		0			0		0			0		0			0		0			0		0			0		0			0		0			0		0			0
0			0		0			0		0			0		0			0		0			0		0			0		0			0		0			0		0			0		0			0
0			0		0			0		0			0		0			0		0			0		0			0		0			0		0			0		0			0		0			0
0			0		0			0		0			0		0			0		0			0		0			0		0			0		0			0		0			0		0			0
0			0		0			0		0			0		0			0		0			0		0			0		0			0		0			0		0			0		0			0
0			0		0			0		0			0		0			0		0			0		0			0		0			0		0			0		0			0		0			0
0			0		0			0		0			0		0			0		0			0		0			0		0			0		0			0		0			0		0			0
0			0		0			0		0			0		0			0		0			0		0			0		0			0		0			0		0			0		0			0
0			0		0			0		0			0		0			0		0			0		0			0		0			0		0			0		0			0		0			0
0			0		0			0		0			0		0			0		0			0		0			0		0			0		0			0		0			0		0			0
0			0		0			0		0			0		0			0		0			0		0			0		0			0		0			0		0			0		0			0
0			0		0			0		0			0		0			0		0			0		0			0		0			0		0			0		0			0		0			0
[truncated: 48 more columns]

## Sheet: raw data_primary cell LFA-1
	2019-02-22 primary T cell LFA-1 cell 4-1 lamellipodium					2019-02-22 primary T cell LFA-1 cell 4-1 cell body					2019-02-22 primary T cell LFA-1 cell 5-1 lamellipodium					2019-02-22 primary T cell LFA-1 cell 5-1 cell body					2019-02-22 primary T cell LFA-1 cell 7-1 lamellipodium					2019-02-22 primary T cell LFA-1 cell 7-1 cell body					2019-02-22 primary T cell LFA-1 cell 8-1 lamellipodium					2019-02-22 primary T cell LFA-1 cell 8-1 cell body					2019-02-28 primary T cell LFA1 cell1-1 lamellipodium					2019-02-28 primary T cell LFA1 cell1-1 cell body
	Average	82.0465				Average	216.677				Average	55.0656				Average	103.385				Average	127.524				Average	62.1778				Average	229.51				Average	68.3618				Average	180.074				Average	91.4139
	StDev	27.4657				StDev	63.597				StDev	23.1333				StDev	29.1022				StDev	49.2828				StDev	19.719				StDev	113.985				StDev	31.7502				StDev	56.0155				StDev	38.711
			setp					setp					setp					setp					setp					setp					setp					setp					setp					setp
	kPa	%				kPa	%				kPa	%				kPa	%				kPa	%				kPa	%				kPa	%				kPa	%				kPa	%				kPa	%
0	0	0.350877	23.6198		0	0	0.699301	328.314		0	0	2.14286	64.9763		0	0	0.549451	58.7283		0	0	1.11111	180.694		0	0	0.833333	32.2173		0	0	0.769231	405.192		0	0	0.909091	42.4848		0	0	1.0101	327.54		0	0	1.04167	87.0469
0	0.32108	0	0		0	0.642159	0	0		0	0.26524	0	0		0	0.33504	0	0		0	0.488599	0	0		0	0.2094	0	0		0	0.823639	0	0		0	0.25128	0	0		0	0.530479	0	0		0	0.29316	0	0
0	0.642159	0	0		0	1.28432	0	0		0	0.530479	0	0		0	0.670079	0	0		0	0.977199	0	0		0	0.418799	0	0		0	1.64728	0	0		0	0.502559	0	0		0	1.06096	0	0		0	0.586319	0	0
0	0.963239	0	0		0	1.92648	0	0		0	0.795719	0	0		0	1.00512	0	0		0	1.4658	0	0		0	0.628199	0	0		0	2.47092	0	0		0	0.753839	0	0		0	1.59144	0	0		0	0.879479	0	0
0	1.28432	0	0		0	2.56864	0	0		0	1.06096	0	0		0	1.34016	0	0		0	1.9544	0	0		0	0.837599	0	0		0	3.29455	0	0		0	1.00512	0	0		0	2.12192	0	0		0	1.17264	0	0
0	1.6054	0	0		0	3.2108	0	0		0	1.3262	0	0		0	1.6752	0	0		0	2.443	0	0		0	1.047	0	0		0	4.11819	0	0		0	1.2564	0	0		0	2.6524	0	0		0	1.4658	0	0
0	1.92648	0	0		0	3.85296	0	0		0	1.59144	0	0		0	2.01024	0	0		0	2.9316	0	0		0	1.2564	0	0		0	4.94183	0	0		0	1.50768	0	0		0	3.18288	0	0		0	1.75896	0	0
0	2.24756	0	0		0	4.49511	0	0		0	1.85668	0	0		0	2.34528	0	0		0	3.4202	0	0		0	1.4658	0	0		0	5.76547	0	0		0	1.75896	0	0		0	3.71335	0	0		0	2.05212	0	0
0	2.56864	0	0		0	5.13727	0	0		0	2.12192	0	0		0	2.68032	0	0		0	3.9088	0	0		0	1.6752	0	0		0	6.58911	0	0		0	2.01024	0	0		0	4.24383	0	0		0	2.34528	0	0
0	2.88972	0	0		0	5.77943	0	0		0	2.38716	0	0		0	3.01536	0	0		0	4.3974	0	0		0	1.8846	0	0		0.0570212	7.41275	0.769231	379.44		0	2.26152	0	0		0	4.77431	0	0		0	2.63844	0	0
0	3.2108	0	0		0	6.42159	0	0		0	2.6524	0	0		0	3.3504	0	0		0	4.88599	0	0		0	2.094	0	0		0	8.23639	0	0		0	2.5128	0	0		0	5.30479	0	0		0	2.9316	0	0
0	3.53187	0	0		0.0493969	7.06375	0.699301	307.257		0	2.91764	0	0		0	3.68544	0	0		0	5.37459	0	0		0	2.3034	0	0		0	9.06003	0	0		0	2.76408	0	0		0	5.83527	0	0		0	3.22476	0	0
0	3.85296	0	0		0	7.70591	0	0		0	3.18288	0	0		0	4.02048	0	0		0	5.86319	0	0		0	2.5128	0	0		0	9.88367	0	0		0	3.01536	0	0		0	6.36575	0	0		0	3.51791	0	0
0	4.17403	0	0		0	8.34807	0	0		0	3.44812	0	0		0	4.35551	0	0		0	6.35179	0	0		0	2.7222	0	0		0	10.7073	0	0		0	3.26664	0	0		0.0696589	6.89623	1.0101	302.933		0	3.81108	0	0
0	4.49511	0	0		0	8.99023	0	0		0	3.71335	0	0		0	4.69055	0	0		0	6.84039	0	0		0	2.9316	0	0		0	11.5309	0	0		0	3.51791	0	0		0	7.42671	0	0		0	4.10424	0	0
0	4.81619	0	0		0	9.63239	0	0		0	3.97859	0	0		0	5.02559	0	0		0.0814332	7.32899	1.11111	160.522		0	3.141	0	0		0	12.3546	0	0		0	3.76919	0	0		0	7.95719	0	0		0	4.39739	0	0
0	5.13727	0	0		0	10.2745	0	0		0	4.24383	0	0		0	5.36063	0	0		0	7.81759	0	0		0	3.3504	0	0		0	13.1782	0	0		0	4.02048	0	0		0	8.48767	0	0		0	4.69055	0	0
0	5.45835	0	0		0	10.9167	0	0		0	4.50907	0	0		0	5.69567	0	0		0	8.30619	0	0		0	3.55979	0	0		0.107707	14.0019	0.769231	357.26		0	4.27175	0	0		0	9.01815	0	0		0	4.98371	0	0
0	5.77943	0	0		0	11.5589	0	0		0	4.77431	0	0		0	6.03071	0	0		0	8.79479	0	0		0	3.76919	0	0		0	14.8255	0	0		0	4.52303	0	0		0	9.54863	0	0		0	5.27687	0	0
0	6.10051	0	0		0	12.201	0	0		0	5.03955	0	0		0	6.36575	0	0		0	9.28339	0	0		0	3.97859	0	0		0	15.6491	0	0		0	4.77431	0	0		0	10.0791	0	0		0	5.57003	0	0
0	6.42159	0	0		0	12.8432	0	0		0	5.30479	0	0		0	6.70079	0	0		0	9.77199	0	0		0	4.18799	0	0		0	16.4728	0	0		0	5.02559	0	0		0	10.6096	0	0		0	5.86319	0	0
0	6.74267	0	0		0	13.4853	0	0		0	5.57003	0	0		0	7.03583	0	0		0	10.2606	0	0		0	4.39739	0	0		0	17.2964	0	0		0	5.27687	0	0		0	11.1401	0	0		0	6.15635	0	0
0	7.06375	0	0		0.0987937	14.1275	0.699301	286.897		0	5.83527	0	0		0	7.37087	0	0		0	10.7492	0	0		0	4.60679	0	0		0	18.12	0	0		0	5.52815	0	0		0	11.6705	0	0		0	6.44951	0	0
0	7.38483	0	0		0	14.7697	0	0		0	6.10051	0	0		0	7.70591	0	0		0	11.2378	0	0		0	4.81619	0	0		0	18.9437	0	0		0	5.77943	0	0		0	12.201	0	0		0	6.74267	0	0
0	7.70591	0	0		0	15.4118	0	0		0	6.36575	0	0		0	8.04095	0	0		0	11.7264	0	0		0	5.02559	0	0		0	19.7673	0	0		0	6.03071	0	0		0	12.7315	0	0		0.0732899	7.03583	1.04167	74.1631
0	8.02699	0	0		0	16.054	0	0		0	6.63099	0	0		0	8.37599	0	0		0	12.215	0	0		0	5.23499	0	0		0	20.591	0	0		0	6.28199	0	0		0	13.262	0	0		0	7.32899	0	0
0	8.34807	0	0		0	16.6961	0	0		0	6.89623	0	0		0	8.71103	0	0		0	12.7036	0	0		0	5.44439	0	0		0.164728	21.4146	0.769231	333.106		0	6.53327	0	0		0	13.7925	0	0		0	7.62215	0	0
0	8.66915	0	0		0	17.3383	0	0		0.0511534	7.16147	0.714286	16.3915		0	9.04607	0	0		0	13.1922	0	0		0	5.65379	0	0		0	22.2383	0	0		0	6.78455	0	0		0	14.3229	0	0		0	7.91531	0	0
0	8.99023	0	0		0	17.9805	0	0		0	7.42671	0	0		0	9.38111	0	0		0	13.6808	0	0		0	5.86319	0	0		0	23.0619	0	0		0.0639621	7.03583	0.909091	34.1897		0	14.8534	0	0		0	8.20847	0	0
0	9.31131	0	0		0	18.6226	0	0		0	7.69195	0	0		0	9.71615	0	0		0	14.1694	0	0		0	6.07259	0	0		0	23.8855	0	0		0	7.28711	0	0		0	15.3839	0	0		0	8.50163	0	0
0	9.63239	0	0		0	19.2648	0	0		0	7.95719	0	0		0	10.0512	0	0		0	14.658	0	0		0	6.28199	0	0		0	24.7092	0	0		0	7.53839	0	0		0	15.9144	0	0		0	8.79479	0	0
0	9.95347	0	0		0	19.9069	0	0		0	8.22243	0	0		0	10.3862	0	0		0	15.1466	0	0		0	6.49139	0	0		0	25.5328	0	0		0	7.78967	0	0		0	16.4449	0	0		0	9.08795	0	0
0	10.2745	0	0		0	20.5491	0	0		0	8.48767	0	0		0	10.7213	0	0		0	15.6352	0	0		0	6.70079	0	0		0	26.3564	0	0		0	8.04095	0	0		0	16.9753	0	0		0	9.38111	0	0
0	10.5956	0	0		0.148191	21.1913	0.699301	267.236		0	8.75291	0	0		0	11.0563	0	0		0	16.1238	0	0		0	6.91019	0	0		0	27.1801	0	0		0	8.29223	0	0		0	17.5058	0	0		0	9.67427	0	0
0	10.9167	0	0		0	21.8334	0	0		0	9.01815	0	0		0	11.3913	0	0		0	16.6124	0	0		0.0889949	7.11959	1.25	37.8925		0	28.0037	0	0		0	8.54351	0	0		0	18.0363	0	0		0	9.96743	0	0
0	11.2378	0	0		0	22.4756	0	0		0	9.28339	0	0		0	11.7264	0	0		0	17.101	0	0		0	7.32899	0	0		0.221749	28.8274	0.769231	309.797		0	8.79479	0	0		0	18.5668	0	0		0	10.2606	0	0
0	11.5589	0	0		0	23.1177	0	0		0	9.54863	0	0		0	12.0614	0	0		0	17.5896	0	0		0	7.53839	0	0		0	29.651	0	0		0	9.04607	0	0		0	19.0972	0	0		0	10.5538	0	0
0	11.8799	0	0		0	23.7599	0	0		0	9.81387	0	0		0	12.3965	0	0		0	18.0782	0	0		0	7.74779	0	0		0	30.4746	0	0		0	9.29735	0	0		0	19.6277	0	0		0	10.8469	0	0
0	12.201	0	0		0	24.402	0	0		0	10.0791	0	0		0	12.7315	0	0		0	18.5668	0	0		0	7.95719	0	0		0	31.2983	0	0		0	9.54863	0	0		0	20.1582	0	0		0	11.1401	0	0
0	12.5221	0	0		0	25.0442	0	0		0	10.3444	0	0		0	13.0665	0	0		0	19.0554	0	0		0	8.16659	0	0		0	32.1219	0	0		0	9.79991	0	0		0	20.6887	0	0		0	11.4332	0	0
0	12.8432	0	0		0	25.6864	0	0		0	10.6096	0	0		0	13.4016	0	0		0	19.544	0	0		0	8.37599	0	0		0	32.9455	0	0		0	10.0512	0	0		0	21.2192	0	0		0	11.7264	0	0
0	13.1643	0	0		0	26.3285	0	0		0	10.8748	0	0		0	13.7366	0	0		0	20.0326	0	0		0	8.58539	0	0		0	33.7692	0	0		0	10.3025	0	0		0	21.7496	0	0		0	12.0195	0	0
0	13.4853	0	0		0	26.9707	0	0		0	11.1401	0	0		0	14.0717	0	0		0	20.5212	0	0		0	8.79479	0	0		0	34.5928	0	0		0	10.5538	0	0		0	22.2801	0	0		0	12.3127	0	0
0	13.8064	0	0		0	27.6128	0	0		0	11.4053	0	0		0	14.4067	0	0		0	21.0098	0	0		0	9.00419	0	0		0.272434	35.4165	0.769231	289.787		0	10.805	0	0		0	22.8106	0	0		0	12.6059	0	0
0	14.1275	0	0		0	28.255	0	0		0	11.6705	0	0		0	14.7417	0	0		0.716612	21.4984	3.33333	374.717		0	9.21359	0	0		0	36.2401	0	0		0	11.0563	0	0		0	23.3411	0	0		0	12.899	0	0
0	14.4486	0	0		0	28.8972	0	0		0	11.9358	0	0		0	15.0768	0	0		0	21.987	0	0		0	9.42299	0	0		0	37.0637	0	0		0	11.3076	0	0		0	23.8716	0	0		0	13.1922	0	0
0	14.7697	0	0		0	29.5393	0	0		0	12.201	0	0		0	15.4118	0	0		0	22.4756	0	0		0	9.63239	0	0		0	37.8874	0	0		0	11.5589	0	0		0	24.402	0	0		0	13.4853	0	0
0	15.0907	0	0		0	30.1815	0	0		0	12.4663	0	0		0	15.7469	0	0		0	22.9642	0	0		0	9.84179	0	0		0	38.711	0	0		0	11.8101	0	0		0	24.9325	0	0		0	13.7785	0	0
0	15.4118	0	0		0	30.8236	0	0		0	12.7315	0	0		0	16.0819	0	0		0	23.4528	0	0		0	10.0512	0	0		0	39.5347	0	0		0	12.0614	0	0		0	25.463	0	0		0	14.0717	0	0
0	15.7329	0	0		0	31.4658	0	0		0	12.9967	0	0		0	16.4169	0	0		0	23.9414	0	0		0	10.2606	0	0		0	40.3583	0	0		0	12.3127	0	0		0	25.9935	0	0		0.149634	14.3648	1.04167	61.8392
0	16.054	0	0		0	32.108	0	0		0	13.262	0	0		0	16.752	0	0		0	24.43	0	0		0	10.47	0	0		0	41.182	0	0		0	12.564	0	0		0	26.524	0	0		0	14.658	0	0
0	16.3751	0	0		0	32.7501	0	0		0	13.5272	0	0		0	17.087	0	0		0	24.9186	0	0		0	10.6794	0	0		0	42.0056	0	0		0	12.8153	0	0		0	27.0544	0	0		0	14.9511	0	0
0	16.6961	0	0		0	33.3923	0	0		0	13.7925	0	0		0	17.4221	0	0		0	25.4072	0	0		0	10.8888	0	0		0.329456	42.8292	0.769231	268.075		0	13.0665	0	0		0	27.5849	0	0		0	15.2443	0	0
0	17.0172	0	0		0	34.0344	0	0		0	14.0577	0	0		0	17.7571	0	0		0	25.8958	0	0		0	11.0982	0	0		0	43.6529	0	0		0	13.3178	0	0		0	28.1154	0	0		0	15.5375	0	0
0	17.3383	0	0		0	34.6766	0	0		0.102307	14.3229	0.714286	11.8569		0	18.0921	0	0		0	26.3844	0	0		0	11.3076	0	0		0	44.4765	0	0		0	13.5691	0	0		0.289352	28.6459	1.0101	231.62		0	15.8306	0	0
0	17.6594	0	0		0	35.3188	0	0		0	14.5882	0	0		0	18.4272	0	0		0	26.873	0	0		0	11.517	0	0		0	45.3001	0	0		0	13.8204	0	0		0	29.1764	0	0		0	16.1238	0	0
0	17.9805	0	0		0	35.9609	0	0		0	14.8534	0	0		0	18.7622	0	0		0	27.3616	0	0		0	11.7264	0	0		0	46.1238	0	0		0	14.0717	0	0		0	29.7068	0	0		0	16.4169	0	0
0	18.3015	0	0		0	36.6031	0	0		0	15.1187	0	0		0	19.0972	0	0		0	27.8502	0	0		0	11.9358	0	0		0	46.9474	0	0		0.91146	14.3229	6.36364	185.831		0	30.2373	0	0		0	16.7101	0	0
0	18.6226	0	0		0	37.2452	0	0		0	15.3839	0	0		0	19.4323	0	0		0	28.3388	0	0		0	12.1452	0	0		0	47.7711	0	0		0	14.5742	0	0		0	30.7678	0	0		0	17.0033	0	0
0	18.9437	0	0		0	37.8874	0	0		0	15.6491	0	0		0	19.7673	0	0		0	28.8274	0	0		0	12.3546	0	0		0	48.5947	0	0		0	14.8255	0	0		0	31.2983	0	0		0	17.2964	0	0
0	19.2648	0	0		0	38.5296	0	0		0	15.9144	0	0		0	20.1024	0	0		0	29.316	0	0		0	12.564	0	0		0	49.4183	0	0		0	15.0768	0	0		0	31.8288	0	0		0	17.5896	0	0
0	19.5859	0	0		0	39.1717	0	0		0	16.1796	0	0		0	20.4374	0	0		0	29.8046	0	0		0	12.7734	0	0		0.386477	50.242	0.769231	247.208		0	15.3281	0	0		0	32.3592	0	0		0	17.8827	0	0
0	19.9069	0	0		0	39.8139	0	0		0	16.4449	0	0		0	20.7724	0	0		0	30.2932	0	0		0	12.9828	0	0		0	51.0656	0	0		0	15.5793	0	0		0	32.8897	0	0		0	18.1759	0	0
0	20.228	0	0		0	40.456	0	0		0	16.7101	0	0		0	21.1075	0	0		0	30.7818	0	0		0	13.1922	0	0		0	51.8892	0	0		0	15.8306	0	0		0	33.4202	0	0		0	18.469	0	0
0	20.5491	0	0		0	41.0982	0	0		0	16.9753	0	0		0	21.4425	0	0		0	31.2704	0	0		0	13.4016	0	0		0	52.7129	0	0		0	16.0819	0	0		0	33.9507	0	0		0	18.7622	0	0
0	20.8702	0	0		0	41.7403	0	0		0	17.2406	0	0		0	21.7776	0	0		0	31.759	0	0		0	13.611	0	0		0	53.5365	0	0		0	16.3332	0	0		0	34.4811	0	0		0	19.0554	0	0
0	21.1913	0	0		0	42.3825	0	0		0	17.5058	0	0		0	22.1126	0	0		0	32.2476	0	0		0	13.8204	0	0		0	54.3602	0	0		0	16.5845	0	0		0	35.0116	0	0		0	19.3485	0	0
0.0754819	21.5123	0.350877	12.8575		0	43.0247	0	0		0	17.7711	0	0		0	22.4476	0	0		0	32.7362	0	0		0	14.0298	0	0		0	55.1838	0	0		0	16.8357	0	0		0	35.5421	0	0		0	19.6417	0	0
0	21.8334	0	0		0	43.6668	0	0		0	18.0363	0	0		0	22.7827	0	0		0	33.2248	0	0		0.11866	14.2392	0.833333	19.1509		0	56.0074	0	0		0	17.087	0	0		0	36.0726	0	0		0	19.9349	0	0
0	22.1545	0	0		0	44.309	0	0		0	18.3015	0	0		0	23.1177	0	0		0	33.7134	0	0		0	14.4486	0	0		0.874325	56.8311	1.53846	458.74		0	17.3383	0	0		0	36.6031	0	0		0	20.228	0	0
0	22.4756	0	0		0	44.9511	0	0		0	18.5668	0	0		0	23.4528	0	0		0	34.202	0	0		0	14.658	0	0		0	57.6547	0	0		0	17.5896	0	0		0	37.1335	0	0		0	20.5212	0	0
0	22.7966	0	0		0	45.5933	0	0		0	18.832	0	0		0	23.7878	0	0		0	34.6906	0	0		0	14.8674	0	0		0	58.4784	0	0		0	17.8409	0	0		0	37.664	0	0		0	20.8143	0	0
0	23.1177	0	0		0	46.2355	0	0		0	19.0972	0	0		0	24.1228	0	0		0	35.1792	0	0		0	15.0768	0	0		0	59.302	0	0		0	18.0921	0	0		0	38.1945	0	0		0	21.1075	0	0
0	23.4388	0	0		0	46.8776	0	0		0	19.3625	0	0		0	24.4579	0	0		0	35.6677	0	0		0	15.2862	0	0		0	60.1256	0	0		0	18.3434	0	0		0	38.725	0	0		0.66877	21.4006	3.125	153.183
0	23.7599	0	0		0	47.5198	0	0		0	19.6277	0	0		0	24.7929	0	0		0	36.1564	0	0		0	15.4956	0	0		0	60.9493	0	0		0	18.5947	0	0		0	39.2555	0	0		0	21.6938	0	0
0	24.081	0	0		0	48.1619	0	0		0	19.893	0	0		0	25.128	0	0		0	36.645	0	0		0	15.705	0	0		0	61.7729	0	0		0	18.846	0	0		0	39.7859	0	0		0	21.987	0	0
0	24.402	0	0		0	48.8041	0	0		0	20.1582	0	0		0	25.463	0	0		0	37.1335	0	0		0	15.9144	0	0		0	62.5966	0	0		0	19.0972	0	0		0	40.3164	0	0		0	22.2801	0	0
0	24.7231	0	0		0	49.4462	0	0		0	20.4234	0	0		0	25.798	0	0		0	37.6221	0	0		0	16.1238	0	0		0	63.4202	0	0		0	19.3485	0	0		0	40.8469	0	0		0	22.5733	0	0
0	25.0442	0	0		0	50.0884	0	0		0	20.6887	0	0		0	26.1331	0	0		0	38.1108	0	0		0	16.3332	0	0		0.494183	64.2438	0.769231	210.1		0	19.5998	0	0		0	41.3774	0	0		0	22.8665	0	0
0	25.3653	0	0		0	50.7306	0	0		0	20.9539	0	0		0	26.4681	0	0		0	38.5994	0	0		0	16.5426	0	0		0	65.0675	0	0		0	19.8511	0	0		0	41.9079	0	0		0	23.1596	0	0
0	25.6864	0	0		0	51.3727	0	0		0	21.2192	0	0		0	26.8032	0	0		0	39.0879	0	0		0	16.752	0	0		0	65.8911	0	0		0	20.1024	0	0		0	42.4383	0	0		0	23.4528	0	0
0	26.0074	0	0		0	52.0149	0	0		0.61384	21.4844	2.85714	32.22		0	27.1382	0	0		0	39.5765	0	0		0	16.9614	0	0		0	66.7147	0	0		0	20.3536	0	0		0	42.9688	0	0		0	23.7459	0	0
0	26.3285	0	0		0	52.657	0	0		0	21.7496	0	0		0	27.4732	0	0		0	40.0652	0	0		0	17.1708	0	0		0	67.5384	0	0		0	20.6049	0	0		0	43.4993	0	0		0	24.0391	0	0
0	26.6496	0	0		0	53.2992	0	0		0	22.0149	0	0		0	27.8083	0	0		0	40.5538	0	0		0	17.3802	0	0		0	68.362	0	0		0	20.8562	0	0		0	44.0298	0	0		0	24.3322	0	0
0	26.9707	0	0		0	53.9414	0	0		0	22.2801	0	0		0	28.1433	0	0		0	41.0423	0	0		0	17.5896	0	0		0	69.1857	0	0		0	21.1075	0	0		0	44.5603	0	0		0	24.6254	0	0
0	27.2918	0	0		0	54.5835	0	0		0	22.5454	0	0		0	28.4784	0	0		0	41.5309	0	0		0	17.799	0	0		0	70.0093	0	0		0.582512	21.3588	2.72727	60.2532		0	45.0907	0	0		0	24.9186	0	0
0	27.6128	0	0		0	55.2257	0	0		0	22.8106	0	0		0	28.8134	0	0		0	42.0196	0	0		0	18.0084	0	0		0	70.8329	0	0		0	21.6101	0	0		0	45.6212	0	0		0	25.2117	0	0
0	27.9339	0	0		0	55.8678	0	0		0	23.0758	0	0		0	29.1484	0	0		0	42.5081	0	0		0	18.2178	0	0		1.65361	71.6566	2.30769	575.025		0	21.8613	0	0		0	46.1517	0	0		0	25.5049	0	0
0	28.255	0	0		0	56.51	0	0		0	23.3411	0	0		0	29.4835	0	0		0	42.9967	0	0		0	18.4272	0	0		0	72.4802	0	0		0	22.1126	0	0		0	46.6822	0	0		0	25.798	0	0
0.501335	28.5761	1.75439	50.1595		0	57.1522	0	0		0	23.6063	0	0		0	29.8185	0	0		0	43.4853	0	0		0	18.6366	0	0		0	73.3039	0	0		0	22.3639	0	0		0	47.2127	0	0		0	26.0912	0	0
0	28.8972	0	0		0	57.7943	0	0		0	23.8716	0	0		0	30.1536	0	0		0	43.9739	0	0		0	18.846	0	0		0	74.1275	0	0		0	22.6152	0	0		0	47.7431	0	0		0	26.3844	0	0
0	29.2182	0	0		0	58.4365	0	0		0	24.1368	0	0		0	30.4886	0	0		0	44.4625	0	0		0	19.0554	0	0		0	74.9511	0	0		0	22.8665	0	0		0	48.2736	0	0		0	26.6775	0	0
0	29.5393	0	0		0	59.0786	0	0		0	24.402	0	0		0	30.8236	0	0		0	44.9511	0	0		0	19.2648	0	0		0	75.7748	0	0		0	23.1177	0	0		0	48.8041	0	0		0	26.9707	0	0
0	29.8604	0	0		0	59.7208	0	0		0	24.6673	0	0		0	31.1587	0	0		0	45.4397	0	0		0	19.4742	0	0		0	76.5984	0	0		0	23.369	0	0		0	49.3346	0	0		0	27.2638	0	0
0	30.1815	0	0		0	60.363	0	0		0	24.9325	0	0		0	31.4937	0	0		0	45.9283	0	0		0	19.6836	0	0		0	77.422	0	0		0	23.6203	0	0		1.00737	49.865	2.0202	342.51		0	27.557	0	0
0	30.5026	0	0		0	61.0051	0	0		0	25.1978	0	0		0	31.8288	0	0		0	46.4169	0	0		0	19.893	0	0		0.60189	78.2457	0.769231	176.007		0	23.8716	0	0		0	50.3955	0	0		0	27.8502	0	0
0	30.8236	0	0		0	61.6473	0	0		0	25.463	0	0		0	32.1638	0	0		0	46.9055	0	0		0	20.1024	0	0		0	79.0693	0	0		0	24.1228	0	0		0	50.926	0	0		0	28.1433	0	0
0	31.1447	0	0		0	62.2894	0	0		0	25.7282	0	0		0	32.4988	0	0		0	47.3941	0	0		0	20.3118	0	0		0	79.893	0	0		0	24.3741	0	0		0	51.4565	0	0		0	28.4365	0	0
0	31.4658	0	0		0	62.9316	0	0		0	25.9935	0	0		0	32.8339	0	0		0	47.8827	0	0		0	20.5212	0	0		0	80.7166	0	0		0	24.6254	0	0		0	51.987	0	0		0	28.7296	0	0
0	31.7869	0	0		0	63.5737	0	0		0	26.2587	0	0		0	33.1689	0	0		0	48.3713	0	0		0	20.7306	0	0		0	81.5402	0	0		0	24.8767	0	0		0	52.5174	0	0		0	29.0228	0	0
0	32.108	0	0		0	64.2159	0	0		0	26.524	0	0		0	33.504	0	0		0	48.8599	0	0		0	20.94	0	0		0	82.3639	0	0		0	25.128	0	0		0	53.0479	0	0		0	29.316	0	0
0	32.429	0	0		0	64.8581	0	0		0	26.7892	0	0		0	33.839	0	0		0	49.3485	0	0		0	21.1494	0	0		0	83.1875	0	0		0	25.3792	0	0		0	53.5784	0	0		0	29.6091	0	0
0	32.7501	0	0		0	65.5002	0	0		0	27.0544	0	0		0	34.174	0	0		0	49.8371	0	0		0.17799	21.3588	0.833333	13.8849		0	84.0112	0	0		0	25.6305	0	0		0	54.1089	0	0		0	29.9023	0	0
0	33.0712	0	0		0	66.1424	0	0		0	27.3197	0	0		0	34.5091	0	0		0	50.3257	0	0		0	21.5682	0	0		0	84.8348	0	0		0	25.8818	0	0		0	54.6394	0	0		0	30.1954	0	0
0	33.3923	0	0		0	66.7845	0	0		0	27.5849	0	0		0	34.8441	0	0		0	50.8143	0	0		0	21.7776	0	0		1.31782	85.6584	1.53846	318.359		0	26.1331	0	0		0	55.1698	0	0		0	30.4886	0	0
0	33.7133	0	0		0	67.4267	0	0		0	27.8502	0	0		0	35.1791	0	0		0	51.3029	0	0		0	21.987	0	0		0	86.4821	0	0		0	26.3844	0	0		0	55.7003	0	0		0	30.7818	0	0
0	34.0344	0	0		0	68.0689	0	0		0	28.1154	0	0		0	35.5142	0	0		0	51.7915	0	0		0	22.1964	0	0		0	87.3057	0	0		0	26.6356	0	0		0	56.2308	0	0		0	31.0749	0	0
0	34.3555	0	0		0	68.711	0	0		0	28.3806	0	0		0	35.8492	0	0		0	52.2801	0	0		0	22.4058	0	0		0	88.1294	0	0		0	26.8869	0	0		0	56.7613	0	0		0	31.3681	0	0
0	34.6766	0	0		0	69.3532	0	0		2.45536	28.6459	8.57143	59.8289		0	36.1843	0	0		0	52.7687	0	0		0	22.6152	0	0		0	88.953	0	0		0	27.1382	0	0		0	57.2918	0	0		0	31.6612	0	0
0	34.9977	0	0		0	69.9953	0	0		0	28.9111	0	0		0	36.5193	0	0		0	53.2573	0	0		0	22.8246	0	0		0	89.7766	0	0		0	27.3895	0	0		0	57.8222	0	0		0	31.9544	0	0
0	35.3188	0	0		0	70.6375	0	0		0	29.1764	0	0		0	36.8543	0	0		0	53.7459	0	0		0	23.034	0	0		0	90.6003	0	0		0	27.6408	0	0		0	58.3527	0	0		0	32.2476	0	0
0.750312	35.6398	2.10526	45.3386		0.498459	71.2797	0.699301	147.835		0	29.4416	0	0		0	37.1894	0	0		0	54.2345	0	0		0	23.2434	0	0		0	91.4239	0	0		0	27.892	0	0		0	58.8832	0	0		0	32.5407	0	0
0	35.9609	0	0		0	71.9218	0	0		0	29.7068	0	0		0	37.5244	0	0		0	54.7231	0	0		0	23.4528	0	0		0	92.2476	0	0		0	28.1433	0	0		0	59.4137	0	0		0	32.8339	0	0
0	36.282	0	0		0	72.564	0	0		0	29.9721	0	0		0	37.8595	0	0		0	55.2117	0	0		0	23.6622	0	0		0.715932	93.0712	0.769231	143.197		0	28.3946	0	0		0	59.9442	0	0		0	33.127	0	0
0	36.6031	0	0		0	73.2061	0	0		0	30.2373	0	0		0	38.1945	0	0		0	55.7003	0	0		0	23.8716	0	0		0	93.8948	0	0		1.82292	28.6459	6.36364	100.377		0	60.4746	0	0		0	33.4202	0	0
0	36.9241	0	0		0	73.8483	0	0		0	30.5026	0	0		0	38.5296	0	0		0	56.1889	0	0		0	24.081	0	0		0	94.7185	0	0		0	28.8972	0	0		0	61.0051	0	0		0	33.7134	0	0
0	37.2452	0	0		0	74.4905	0	0		0	30.7678	0	0		0	38.8646	0	0		0	56.6775	0	0		0	24.2904	0	0		0	95.5421	0	0		0	29.1484	0	0		0	61.5356	0	0		0	34.0065	0	0
0	37.5663	0	0		0	75.1326	0	0		0	31.033	0	0		0	39.1996	0	0		1.27036	57.1661	2.22222	110.006		0	24.4998	0	0		0	96.3657	0	0		0	29.3997	0	0		0	62.0661	0	0		0	34.2997	0	0
0	37.8874	0	0		0	75.7748	0	0		0	31.2983	0	0		0	39.5347	0	0		0	57.6547	0	0		0	24.7092	0	0		0	97.1894	0	0		0	29.651	0	0		0	62.5966	0	0		0	34.5928	0	0
0	38.2085	0	0		0	76.4169	0	0		0	31.5635	0	0		0	39.8697	0	0		0	58.1433	0	0		0	24.9186	0	0		0	98.013	0	0		0	29.9023	0	0		0	63.127	0	0		0	34.886	0	0
0	38.5296	0	0		0	77.0591	0	0		0	31.8288	0	0		0	40.2047	0	0		0	58.6319	0	0		0	25.128	0	0		0	98.8367	0	0		0	30.1536	0	0		0	63.6575	0	0		0	35.1791	0	0
0	38.8506	0	0		0	77.7013	0	0		0	32.094	0	0		0	40.5398	0	0		0	59.1205	0	0		0	25.3374	0	0		1.53324	99.6603	1.53846	259.4		0	30.4048	0	0		1.29673	64.188	2.0202	271.303		0	35.4723	0	0
0	39.1717	0	0		0.547856	78.3434	0.699301	133.82		0	32.3592	0	0		0	40.8748	0	0		0	59.6091	0	0		0	25.5468	0	0		0	100.484	0	0		0	30.6561	0	0		0	64.7185	0	0		1.11767	35.7655	3.125	96.7733
0	39.4928	0	0		0	78.9856	0	0		0	32.6245	0	0		0	41.2099	0	0		0	60.0977	0	0		0	25.7562	0	0		0	101.308	0	0		0	30.9074	0	0		0	65.249	0	0		0	36.0586	0	0
0	39.8139	0	0		0	79.6277	0	0		0	32.8897	0	0		0	41.5449	0	0		0	60.5863	0	0		0	25.9656	0	0		0	102.131	0	0		0	31.1587	0	0		0	65.7794	0	0		0	36.3518	0	0
0	40.135	0	0		0	80.2699	0	0		0	33.155	0	0		0	41.88	0	0		0	61.0749	0	0		0	26.175	0	0		0	102.955	0	0		0	31.41	0	0		0	66.3099	0	0		0	36.645	0	0
0	40.456	0	0		0	80.912	0	0		0	33.4202	0	0		0	42.215	0	0		0	61.5635	0	0		0	26.3844	0	0		0	103.778	0	0		0	31.6612	0	0		0	66.8404	0	0		0	36.9381	0	0
0	40.7771	0	0		0	81.5542	0	0		0	33.6854	0	0		0	42.55	0	0		0	62.0521	0	0		0	26.5938	0	0		0	104.602	0	0		0	31.9125	0	0		0	67.3709	0	0		0	37.2313	0	0
0	41.0982	0	0		0	82.1964	0	0		0	33.9507	0	0		0.235632	42.8851	0.549451	20.1115		0	62.5407	0	0		0	26.8032	0	0		0	105.426	0	0		0	32.1638	0	0		0	67.9013	0	0		0	37.5244	0	0
0	41.4193	0	0		0	82.8385	0	0		0	34.2159	0	0		0	43.2201	0	0		0	63.0293	0	0		0	27.0126	0	0		0	106.249	0	0		0	32.4151	0	0		0	68.4318	0	0		0	37.8176	0	0
0	41.7403	0	0		0	83.4807	0	0		0	34.4811	0	0		0	43.5551	0	0		0	63.5179	0	0		0	27.222	0	0		1.64728	107.073	1.53846	230.628		0	32.6664	0	0		0	68.9623	0	0		0	38.1108	0	0
0	42.0614	0	0		0	84.1228	0	0		0	34.7464	0	0		0	43.8902	0	0		1.42237	64.0065	2.22222	89.6561		0	27.4314	0	0		0	107.897	0	0		0	32.9176	0	0		0	69.4928	0	0		0	38.4039	0	0
0	42.3825	0	0		0	84.765	0	0		0	35.0116	0	0		0	44.2252	0	0		0	64.4951	0	0		0	27.6408	0	0		0	108.72	0	0		0	33.1689	0	0		0	70.0233	0	0		0	38.6971	0	0
1.94788	42.7036	4.5614	70.6045		0	85.4072	0	0		0	35.2769	0	0		0	44.5603	0	0		0	64.9837	0	0		0	27.8502	0	0		0	109.544	0	0		0	33.4202	0	0		0	70.5537	0	0		0	38.9902	0	0
0	43.0247	0	0		0	86.0493	0	0		3.04647	35.5421	8.57143	32.6716		0	44.8953	0	0		0	65.4723	0	0		0	28.0596	0	0		0	110.368	0	0		0	33.6715	0	0		0.718023	71.0842	1.0101	119.987		0	39.2834	0	0
0	43.3457	0	0		0	86.6915	0	0		0	35.8073	0	0		0	45.2303	0	0		0	65.9609	0	0		0	28.269	0	0		0	111.191	0	0		0	33.9228	0	0		0	71.6147	0	0		0	39.5765	0	0
0	43.6668	0	0		0	87.3336	0	0		0	36.0726	0	0		0	45.5654	0	0		0	66.4495	0	0		0.949279	28.4784	3.33333	37.855		0	112.015	0	0		0	34.174	0	0		0	72.1452	0	0		0	39.8697	0	0
0	43.9879	0	0		0	87.9758	0	0		0	36.3378	0	0		0	45.9004	0	0		0	66.9381	0	0		0	28.6878	0	0		0	112.838	0	0		0	34.4253	0	0		0	72.6757	0	0		0	40.1629	0	0
0	44.309	0	0		0	88.618	0	0		0	36.6031	0	0		0	46.2355	0	0		0	67.4267	0	0		0	28.8972	0	0		0	113.662	0	0		0	34.6766	0	0		0	73.2061	0	0		0	40.456	0	0
0	44.6301	0	0		0	89.2601	0	0		0	36.8683	0	0		0	46.5705	0	0		0	67.9153	0	0		0	29.1066	0	0		1.76132	114.486	1.53846	203.548		0	34.9279	0	0		0	73.7366	0	0		0	40.7492	0	0
0	44.9511	0	0		0	89.9023	0	0		0	37.1335	0	0		0	46.9055	0	0		0	68.4039	0	0		0	29.316	0	0		0	115.309	0	0		0	35.1791	0	0		0	74.2671	0	0		0	41.0423	0	0
0	45.2722	0	0		0	90.5444	0	0		0	37.3988	0	0		0	47.2406	0	0		0	68.8925	0	0		0	29.5254	0	0		0	116.133	0	0		0	35.4304	0	0		0	74.7976	0	0		0	41.3355	0	0
0	45.5933	0	0		0	91.1866	0	0		0	37.664	0	0		0	47.5756	0	0		0	69.3811	0	0		0	29.7348	0	0		0	116.957	0	0		1.94627	35.6817	5.45455	58.2538		0	75.3281	0	0		0	41.6287	0	0
0	45.9144	0	0		0	91.8288	0	0		0	37.9293	0	0		0	47.9107	0	0		0	69.8697	0	0		0	29.9442	0	0		0	117.78	0	0		0	35.933	0	0		0	75.8585	0	0		0	41.9218	0	0
0	46.2355	0	0		1.93995	92.4709	2.0979	323.647		0	38.1945	0	0		0	48.2457	0	0		0	70.3583	0	0		0	30.1536	0	0		0	118.604	0	0		0	36.1843	0	0		0	76.389	0	0		0	42.215	0	0
0	46.5565	0	0		0	93.1131	0	0		0	38.4597	0	0		0	48.5807	0	0		0	70.8469	0	0		0	30.363	0	0		0	119.428	0	0		0	36.4355	0	0		0	76.9195	0	0		0	42.5081	0	0
0	46.8776	0	0		0	93.7552	0	0		0	38.725	0	0		0	48.9158	0	0		3.96308	71.3355	5.55556	175.4		0	30.5724	0	0		0	120.251	0	0		0	36.6868	0	0		0	77.45	0	0		2.22923	42.8013	5.20833	123.082
0	47.1987	0	0		0	94.3974	0	0		0	38.9902	0	0		0	49.2508	0	0		0	71.8241	0	0		0	30.7818	0	0		3.72538	121.075	3.07692	361.791		0	36.9381	0	0		0	77.9805	0	0		0	43.0945	0	0
0	47.5198	0	0		0	95.0396	0	0		0	39.2555	0	0		0	49.5859	0	0		0	72.3127	0	0		0	30.9912	0	0		0	121.899	0	0		0	37.1894	0	0		0	78.5109	0	0		0	43.3876	0	0
0	47.8409	0	0		0	95.6817	0	0		0	39.5207	0	0		0.548581	49.9209	1.0989	31.4117		0	72.8013	0	0		0	31.2006	0	0		0	122.722	0	0		0	37.4407	0	0		0	79.0414	0	0		0	43.6808	0	0
0	48.1619	0	0		0	96.3239	0	0		0	39.7859	0	0		0	50.2559	0	0		0	73.2899	0	0		0	31.41	0	0		0	123.546	0	0		0	37.6919	0	0		0	79.5719	0	0		0	43.9739	0	0
0	48.483	0	0		0	96.966	0	0		0	40.0512	0	0		0	50.591	0	0		0	73.7785	0	0		0	31.6194	0	0		0	124.37	0	0		0	37.9432	0	0		0	80.1024	0	0		0	44.2671	0	0
0	48.8041	0	0		0	97.6082	0	0		0	40.3164	0	0		0	50.926	0	0		0	74.2671	0	0		0	31.8288	0	0		0	125.193	0	0		0	38.1945	0	0		0	80.6329	0	0		0	44.5603	0	0
0	49.1252	0	0		0	98.2503	0	0		0	40.5817	0	0		0	51.261	0	0		0	74.7557	0	0		0	32.0382	0	0		0	126.017	0	0		0	38.4458	0	0		0	81.1633	0	0		0	44.8534	0	0
0	49.4462	0	0		0	98.8925	0	0		0	40.8469	0	0		0	51.5961	0	0		0	75.2443	0	0		0	32.2475	0	0		0	126.84	0	0		0	38.6971	0	0		0	81.6938	0	0		0	45.1466	0	0
0	49.7673	0	0		0	99.5347	0	0		0	41.1121	0	0		0	51.9311	0	0		0	75.7329	0	0		0	32.457	0	0		0	127.664	0	0		0	38.9483	0	0		0	82.2243	0	0		0	45.4397	0	0
2.28473	50.0884	4.5614	46.5866		1.40107	100.177	1.3986	189.822		0	41.3774	0	0		0	52.2662	0	0		0	76.2215	0	0		0	32.6664	0	0		1.97673	128.488	1.53846	157.008		0	39.1996	0	0		0	82.7548	0	0		0	45.7329	0	0
0	50.4095	0	0		0	100.819	0	0		0	41.6426	0	0		0	52.6012	0	0		0	76.7101	0	0		0	32.8757	0	0		0	129.311	0	0		0	39.4509	0	0		0	83.2853	0	0		0	46.0261	0	0
0	50.7306	0	0		0	101.461	0	0		0	41.9079	0	0		0	52.9363	0	0		0	77.1987	0	0		0	33.0852	0	0		0	130.135	0	0		0	39.7022	0	0		0	83.8157	0	0		0	46.3192	0	0
0	51.0517	0	0		0	102.103	0	0		0	42.1731	0	0		0	53.2713	0	0		0	77.6873	0	0		0	33.2946	0	0		0	130.959	0	0		0	39.9535	0	0		0	84.3462	0	0		0	46.6124	0	0
0	51.3727	0	0		0	102.746	0	0		0	42.4383	0	0		0	53.6063	0	0		0	78.1759	0	0		0	33.504	0	0		0	131.782	0	0		0	40.2047	0	0		0	84.8767	0	0		0	46.9055	0	0
0	51.6938	0	0		0	103.388	0	0		5.49046	42.7036	12.8571	19.6484		0	53.9414	0	0		3.4962	78.6645	4.44444	106.102		0	33.7133	0	0		0	132.606	0	0		0	40.456	0	0		0	85.4072	0	0		0	47.1987	0	0
0	52.0149	0	0		0	104.03	0	0		0	42.9688	0	0		0	54.2764	0	0		0	79.1531	0	0		0	33.9228	0	0		0	133.429	0	0		0	40.7073	0	0		0	85.9376	0	0		0	47.4919	0	0
0	52.336	0	0		0	104.672	0	0		0	43.2341	0	0		0	54.6114	0	0		0	79.6417	0	0		0	34.1322	0	0		0	134.253	0	0		0	40.9586	0	0		0	86.4681	0	0		0	47.785	0	0
0	52.657	0	0		0	105.314	0	0		0	43.4993	0	0		0	54.9465	0	0		0	80.1303	0	0		0	34.3415	0	0		0	135.077	0	0		0	41.2099	0	0		0	86.9986	0	0		0	48.0782	0	0
0	52.9781	0	0		0	105.956	0	0		0	43.7645	0	0		0	55.2815	0	0		0	80.6189	0	0		0	34.551	0	0		2.09078	135.9	1.53846	134.812		0	41.4611	0	0		0	87.5291	0	0		0	48.3713	0	0
0	53.2992	0	0		0	106.598	0	0		0	44.0298	0	0		0	55.6166	0	0		0	81.1075	0	0		0	34.7604	0	0		0	136.724	0	0		0	41.7124	0	0		0	88.0596	0	0		0	48.6645	0	0
0	53.6203	0	0		0	107.241	0	0		0	44.295	0	0		0	55.9516	0	0		0	81.5961	0	0		0	34.9697	0	0		0	137.548	0	0		0	41.9637	0	0		0	88.5901	0	0		0	48.9577	0	0
0	53.9414	0	0		0	107.883	0	0		0	44.5603	0	0		0	56.2866	0	0		0	82.0847	0	0		0	35.1791	0	0		0	138.371	0	0		0	42.215	0	0		0	89.1205	0	0		0	49.2508	0	0
0	54.2625	0	0		0	108.525	0	0		0	44.8255	0	0		0	56.6217	0	0		0	82.5733	0	0		0	35.3886	0	0		0	139.195	0	0		0	42.4663	0	0		0	89.651	0	0		0	49.544	0	0
0	54.5835	0	0		0	109.167	0	0		0	45.0907	0	0		1.87769	56.9567	3.2967	71.0647		0	83.0619	0	0		1.63157	35.5979	4.58333	32.3806		0	140.019	0	0		2.71839	42.7175	6.36364	41.849		0	90.1815	0	0		1.55741	49.8371	3.125	54.0196
0	54.9046	0	0		0	109.809	0	0		0	45.356	0	0		0	57.2918	0	0		0	83.5505	0	0		0	35.8073	0	0		0	140.842	0	0		0	42.9688	0	0		0	90.712	0	0		0	50.1303	0	0
0	55.2257	0	0		0	110.451	0	0		0	45.6212	0	0		0	57.6268	0	0		0	84.0391	0	0		0	36.0168	0	0		0	141.666	0	0		0	43.2201	0	0		0	91.2424	0	0		0	50.4235	0	0
0	55.5468	0	0		0	111.094	0	0		0	45.8865	0	0		0	57.9618	0	0		0	84.5277	0	0		0	36.2261	0	0		4.38429	142.489	3.07692	233.003		0	43.4714	0	0		0	91.7729	0	0		0	50.7166	0	0
0	55.8678	0	0		0	111.736	0	0		0	46.1517	0	0		0	58.2969	0	0		0	85.0163	0	0		0	36.4355	0	0		0	143.313	0	0		0	43.7227	0	0		0	92.3034	0	0		0	51.0098	0	0
0	56.1889	0	0		0	112.378	0	0		0	46.4169	0	0		0	58.6319	0	0		4.75027	85.5049	5.55556	98.0913		0	36.645	0	0		0	144.137	0	0		0	43.9739	0	0		0	92.8339	0	0		0	51.3029	0	0
0	56.51	0	0		0	113.02	0	0		0	46.6822	0	0		0	58.967	0	0		0	85.9935	0	0		0	36.8543	0	0		0	144.96	0	0		0	44.2252	0	0		0	93.3644	0	0		0	51.5961	0	0
0	56.8311	0	0		0	113.662	0	0		0	46.9474	0	0		0	59.302	0	0		0	86.4821	0	0		0	37.0637	0	0		0	145.784	0	0		0	44.4765	0	0		0	93.8948	0	0		0	51.8892	0	0
5.41442	57.1522	9.47368	58.7112		0	114.304	0	0		0	47.2127	0	0		0	59.637	0	0		0	86.9707	0	0		0	37.2732	0	0		0	146.608	0	0		0	44.7278	0	0		0	94.4253	0	0		0	52.1824	0	0
0	57.4732	0	0		0	114.947	0	0		0	47.4779	0	0		0	59.9721	0	0		0	87.4593	0	0		0	37.4826	0	0		0	147.431	0	0		0	44.9791	0	0		0	94.9558	0	0		0	52.4756	0	0
0	57.7943	0	0		0	115.589	0	0		0	47.7431	0	0		0	60.3071	0	0		0	87.9479	0	0		0	37.6919	0	0		0	148.255	0	0		0	45.2303	0	0		0	95.4863	0	0		0	52.7687	0	0
0	58.1154	0	0		0	116.231	0	0		0	48.0084	0	0		0	60.6422	0	0		0	88.4365	0	0		0	37.9014	0	0		0	149.079	0	0		0	45.4816	0	0		0	96.0168	0	0		0	53.0619	0	0
0	58.4365	0	0		0	116.873	0	0		0	48.2736	0	0		0	60.9772	0	0		0	88.9251	0	0		0	38.1108	0	0		2.30619	149.902	1.53846	97.4987		0	45.7329	0	0		0	96.5472	0	0		0	53.355	0	0
0	58.7576	0	0		0	117.515	0	0		0	48.5389	0	0		0	61.3122	0	0		0	89.4137	0	0		0	38.3201	0	0		0	150.726	0	0		0	45.9842	0	0		0	97.0777	0	0		0	53.6482	0	0
0	59.0786	0	0		0	118.157	0	0		0	48.8041	0	0		0	61.6473	0	0		0	89.9023	0	0		0	38.5296	0	0		0	151.549	0	0		0	46.2355	0	0		0	97.6082	0	0		0	53.9414	0	0
0	59.3997	0	0		0	118.799	0	0		0	49.0693	0	0		0	61.9823	0	0		0	90.3909	0	0		0	38.739	0	0		0	152.373	0	0		0	46.4867	0	0		0	98.1387	0	0		0	54.2345	0	0
0	59.7208	0	0		0	119.442	0	0		0	49.3346	0	0		0	62.3174	0	0		0	90.8795	0	0		0	38.9483	0	0		0	153.197	0	0		0	46.738	0	0		0	98.6692	0	0		0	54.5277	0	0
0	60.0419	0	0		0	120.084	0	0		0	49.5998	0	0		0	62.6524	0	0		0	91.3681	0	0		0	39.1578	0	0		0	154.02	0	0		0	46.9893	0	0		0	99.1996	0	0		0	54.8209	0	0
0	60.363	0	0		0	120.726	0	0		6.7674	49.865	13.5714	3.67056		0	62.9874	0	0		0	91.8567	0	0		0	39.3671	0	0		0	154.844	0	0		0	47.2406	0	0		2.01475	99.7301	2.0202	130.406		0	55.114	0	0
0	60.684	0	0		0.848728	121.368	0.699301	63.5231		0	50.1303	0	0		0	63.3225	0	0		0	92.3453	0	0		0	39.5765	0	0		0	155.668	0	0		0	47.4919	0	0		0	100.261	0	0		0	55.4072	0	0
0	61.0051	0	0		0	122.01	0	0		0	50.3955	0	0		0	63.6575	0	0		2.06297	92.8339	2.22222	26.743		0	39.7859	0	0		0	156.491	0	0		0	47.7431	0	0		0	100.791	0	0		0	55.7003	0	0
0	61.3262	0	0		0	122.652	0	0		0	50.6608	0	0		0	63.9926	0	0		0	93.3225	0	0		0	39.9954	0	0		1.21012	157.315	0.769231	40.0934		0	47.9944	0	0		0	101.322	0	0		0	55.9935	0	0
0	61.6473	0	0		0	123.294	0	0		0	50.926	0	0		3.18103	64.3276	4.94505	75.4377		0	93.8111	0	0		0	40.2047	0	0		0	158.139	0	0		0	48.2457	0	0		0	101.852	0	0		0	56.2866	0	0
0	61.9684	0	0		0	123.937	0	0		0	51.1912	0	0		0	64.6626	0	0		0	94.2997	0	0		0	40.4141	0	0		0	158.962	0	0		0	48.497	0	0		0	102.382	0	0		0	56.5798	0	0
0	62.2894	0	0		0	124.579	0	0		0	51.4565	0	0		0	64.9977	0	0		0	94.7883	0	0		0	40.6235	0	0		0	159.786	0	0		0	48.7483	0	0		0	102.913	0	0		0	56.873	0	0
0	62.6105	0	0		0	125.221	0	0		0	51.7217	0	0		0	65.3327	0	0		0	95.2769	0	0		0	40.8329	0	0		0	160.61	0	0		0	48.9995	0	0		0	103.444	0	0		4.76384	57.1661	8.33333	97.7424
0	62.9316	0	0		0	125.863	0	0		0	51.987	0	0		0	65.6678	0	0		0	95.7655	0	0		0	41.0423	0	0		0	161.433	0	0		0	49.2508	0	0		0	103.974	0	0		0	57.4593	0	0
0	63.2527	0	0		0	126.505	0	0		0	52.2522	0	0		0	66.0028	0	0		0	96.2541	0	0		0	41.2517	0	0		0	162.257	0	0		0	49.5021	0	0		0	104.504	0	0		0	57.7525	0	0
0	63.5737	0	0		0	127.147	0	0		0	52.5174	0	0		0	66.3378	0	0		0	96.7427	0	0		0	41.4611	0	0		0	163.081	0	0		0	49.7534	0	0		0	105.035	0	0		0	58.0456	0	0
0	63.8948	0	0		0	127.79	0	0		0	52.7827	0	0		0	66.6729	0	0		0	97.2313	0	0		0	41.6705	0	0		2.5216	163.904	1.53846	66.2178		1.36376	50.0046	2.72727	9.19047		0	105.565	0	0		0	58.3388	0	0
6.08361	64.2159	9.47368	30.1198		1.79625	128.432	1.3986	108.912		0	53.0479	0	0		0	67.0079	0	0		0	97.7199	0	0		0	41.88	0	0		0	164.728	0	0		0	50.2559	0	0		0	106.096	0	0		0	58.6319	0	0
0	64.537	0	0		0	129.074	0	0		0	53.3132	0	0		0	67.343	0	0		0	98.2085	0	0		0	42.0893	0	0		0	165.551	0	0		0	50.5072	0	0		0	106.626	0	0		0	58.9251	0	0
0	64.8581	0	0		0	129.716	0	0		0	53.5784	0	0		0	67.678	0	0		0	98.6971	0	0		0	42.2987	0	0		0	166.375	0	0		0	50.7585	0	0		2.16478	107.157	2.0202	107.411		0	59.2182	0	0
0	65.1792	0	0		0	130.358	0	0		0	53.8436	0	0		0	68.013	0	0		0	99.1857	0	0		0	42.5081	0	0		0	167.199	0	0		0	51.0098	0	0		0	107.687	0	0		0	59.5114	0	0
0	65.5002	0	0		0	131	0	0		0	54.1089	0	0		0	68.3481	0	0		5.53746	99.6743	5.55556	43.0906		3.5598	42.7175	8.33333	31.5583		0	168.022	0	0		0	51.261	0	0		0	108.218	0	0		0	59.8046	0	0
0	65.8213	0	0		0	131.643	0	0		0	54.3741	0	0		0	68.6831	0	0		0	100.163	0	0		0	42.9269	0	0		0	168.846	0	0		0	51.5123	0	0		0	108.748	0	0		0	60.0977	0	0
0	66.1424	0	0		0	132.285	0	0		0	54.6394	0	0		0	69.0181	0	0		0	100.651	0	0		0	43.1363	0	0		0	169.67	0	0		0	51.7636	0	0		0	109.279	0	0		0	60.3909	0	0
0	66.4635	0	0		0	132.927	0	0		0	54.9046	0	0		0	69.3532	0	0		0	101.14	0	0		0	43.3457	0	0		0	170.493	0	0		0	52.0149	0	0		0	109.809	0	0		0	60.684	0	0
0	66.7845	0	0		0	133.569	0	0		0	55.1698	0	0		0	69.6882	0	0		0	101.629	0	0		0	43.5551	0	0		11.8604	171.317	6.92308	234.447		0	52.2662	0	0		0	110.34	0	0		0	60.9772	0	0
0	67.1056	0	0		0	134.211	0	0		0	55.4351	0	0		0	70.0233	0	0		0	102.117	0	0		0	43.7645	0	0		0	172.141	0	0		0	52.5174	0	0		0	110.87	0	0		0	61.2704	0	0
0	67.4267	0	0		0	134.853	0	0		0	55.7003	0	0		0	70.3583	0	0		0	102.606	0	0		0	43.9739	0	0		0	172.964	0	0		0	52.7687	0	0		0	111.401	0	0		0	61.5635	0	0
0	67.7478	0	0		0.947522	135.496	0.699301	46.0869		0	55.9656	0	0		0	70.6933	0	0		0	103.094	0	0		0	44.1833	0	0		0	173.788	0	0		0	53.02	0	0		0	111.931	0	0		0	61.8567	0	0
0	68.0689	0	0		0	136.138	0	0		0	56.2308	0	0		0	71.0284	0	0		0	103.583	0	0		0	44.3927	0	0		0	174.612	0	0		0	53.2713	0	0		0	112.462	0	0		0	62.1498	0	0
0	68.3899	0	0		0	136.78	0	0		0	56.496	0	0		4.31317	71.3634	6.04396	61.9754		0	104.072	0	0		0	44.6021	0	0		0	175.435	0	0		0	53.5226	0	0		0	112.992	0	0		0	62.443	0	0
0	68.711	0	0		0	137.422	0	0		0	56.7613	0	0		0	71.6985	0	0		0	104.56	0	0		0	44.8115	0	0		0	176.259	0	0		0	53.7739	0	0		0	113.523	0	0		0	62.7362	0	0
0	69.0321	0	0		0	138.064	0	0		6.51732	57.0265	11.4286	0.439431		0	72.0335	0	0		0	105.049	0	0		0	45.0209	0	0		0	177.082	0	0		0	54.0251	0	0		1.15205	114.053	1.0101	44.0275		0	63.0293	0	0
0	69.3532	0	0		0	138.706	0	0		0	57.2918	0	0		0	72.3685	0	0		0	105.537	0	0		0	45.2303	0	0		0	177.906	0	0		0	54.2764	0	0		0	114.584	0	0		0	63.3225	0	0
0	69.6743	0	0		0	139.349	0	0		0	57.557	0	0		0	72.7036	0	0		0	106.026	0	0		0	45.4397	0	0		6.87422	178.73	3.84615	99.1794		0	54.5277	0	0		0	115.114	0	0		0	63.6156	0	0
0	69.9953	0	0		0	139.991	0	0		0	57.8222	0	0		0	73.0386	0	0		0	106.515	0	0		0	45.6491	0	0		0	179.553	0	0		0	54.779	0	0		0	115.644	0	0		0	63.9088	0	0
0	70.3164	0	0		0	140.633	0	0		0	58.0875	0	0		0	73.3737	0	0		4.7557	107.003	4.44444	18.7163		0	45.8585	0	0		0	180.377	0	0		0	55.0303	0	0		0	116.175	0	0		4.01262	64.2019	6.25	46.2806
0	70.6375	0	0		0	141.275	0	0		0	58.3527	0	0		0	73.7087	0	0		0	107.492	0	0		0	46.0679	0	0		0	181.201	0	0		0	55.2815	0	0		0	116.705	0	0		0	64.4951	0	0
0	70.9586	0	0		0	141.917	0	0		0	58.618	0	0		0	74.0437	0	0		0	107.981	0	0		0	46.2773	0	0		0	182.024	0	0		0	55.5328	0	0		0	117.236	0	0		0	64.7883	0	0
6.50271	71.2797	9.12281	10.5757		0	142.559	0	0		0	58.8832	0	0		0	74.3788	0	0		0	108.469	0	0		0	46.4867	0	0		0	182.848	0	0		0	55.7841	0	0		0	117.766	0	0		0	65.0814	0	0
0	71.6008	0	0		0	143.202	0	0		0	59.1484	0	0		0	74.7138	0	0		0	108.958	0	0		0	46.6961	0	0		0	183.672	0	0		0	56.0354	0	0		0	118.297	0	0		0	65.3746	0	0
0	71.9218	0	0		0	143.844	0	0		0	59.4137	0	0		0	75.0489	0	0		0	109.446	0	0		0	46.9055	0	0		0	184.495	0	0		0	56.2866	0	0		0	118.827	0	0		0	65.6678	0	0
0	72.2429	0	0		0	144.486	0	0		0	59.6789	0	0		0	75.3839	0	0		0	109.935	0	0		0	47.1149	0	0		1.42553	185.319	0.769231	15.0222		0	56.5379	0	0		0	119.358	0	0		0	65.9609	0	0
0	72.564	0	0		0	145.128	0	0		0	59.9442	0	0		0	75.7189	0	0		0	110.424	0	0		0	47.3243	0	0		0	186.142	0	0		0	56.7892	0	0		0	119.888	0	0		0	66.2541	0	0
0	72.8851	0	0		0	145.77	0	0		0	60.2094	0	0		0	76.054	0	0		0	110.912	0	0		0	47.5337	0	0		0	186.966	0	0		3.1113	57.0405	5.45455	6.99118		0	120.419	0	0		0	66.5472	0	0
0	73.2061	0	0		0	146.412	0	0		0	60.4746	0	0		0	76.389	0	0		0	111.401	0	0		0	47.7431	0	0		0	187.79	0	0		0	57.2918	0	0		0	120.949	0	0		0	66.8404	0	0
0	73.5272	0	0		0	147.054	0	0		0	60.7399	0	0		0	76.7241	0	0		0	111.889	0	0		0	47.9525	0	0		0	188.613	0	0		0	57.5431	0	0		3.68121	121.48	3.0303	104.037		0	67.1335	0	0
0	73.8483	0	0		0	147.697	0	0		0	61.0051	0	0		0	77.0591	0	0		0	112.378	0	0		0	48.1619	0	0		0	189.437	0	0		0	57.7943	0	0		0	122.01	0	0		0	67.4267	0	0
0	74.1694	0	0		0	148.339	0	0		0	61.2704	0	0		0	77.3941	0	0		0	112.866	0	0		0	48.3713	0	0		0	190.261	0	0		0	58.0456	0	0		0	122.541	0	0		0	67.7199	0	0
0	74.4905	0	0		0	148.981	0	0		0	61.5356	0	0		0	77.7292	0	0		0	113.355	0	0		0	48.5807	0	0		0	191.084	0	0		0	58.2969	0	0		0	123.071	0	0		0	68.013	0	0
0	74.8115	0	0		5.23158	149.623	3.4965	157.211		0	61.8008	0	0		0	78.0642	0	0		0	113.844	0	0		0	48.7901	0	0		0	191.908	0	0		0	58.5482	0	0		0	123.602	0	0		0	68.3062	0	0
0	75.1326	0	0		0	150.265	0	0		0	62.0661	0	0		6.89224	78.3993	8.79121	54.8845		1.27036	114.332	1.11111	1.93369		0	48.9995	0	0		2.9651	192.732	1.53846	20.8103		0	58.7994	0	0		0	124.132	0	0		0	68.5993	0	0
0	75.4537	0	0		0	150.907	0	0		0	62.3313	0	0		0	78.7343	0	0		0	114.821	0	0		0	49.2089	0	0		0	193.555	0	0		0	59.0507	0	0		0	124.663	0	0		0	68.8925	0	0
0	75.7748	0	0		0	151.55	0	0		0	62.5966	0	0		0	79.0693	0	0		0	115.309	0	0		0	49.4183	0	0		0	194.379	0	0		0	59.302	0	0		0	125.193	0	0		0	69.1857	0	0
0	76.0959	0	0		0	152.192	0	0		0	62.8618	0	0		0	79.4044	0	0		0	115.798	0	0		0	49.6277	0	0		0	195.202	0	0		0	59.5533	0	0		0	125.724	0	0		0	69.4788	0	0
0	76.4169	0	0		0	152.834	0	0		0	63.127	0	0		0	79.7394	0	0		0	116.287	0	0		4.5684	49.8371	9.16667	13.96		0	196.026	0	0		0	59.8046	0	0		0	126.254	0	0		0	69.772	0	0
0	76.738	0	0		0	153.476	0	0		0	63.3923	0	0		0	80.0744	0	0		0	116.775	0	0		0	50.0465	0	0		0	196.85	0	0		0	60.0558	0	0		0	126.784	0	0		0	70.0652	0	0
0	77.0591	0	0		0	154.118	0	0		0	63.6575	0	0		0	80.4095	0	0		0	117.264	0	0		0	50.2559	0	0		0	197.673	0	0		0	60.3071	0	0		0	127.315	0	0		0	70.3583	0	0
0	77.3802	0	0		0	154.76	0	0		0	63.9228	0	0		0	80.7445	0	0		0	117.752	0	0		0	50.4653	0	0		0	198.497	0	0		0	60.5584	0	0		0	127.846	0	0		0	70.6515	0	0
0	77.7013	0	0		0	155.403	0	0		9.16972	64.188	14.2857	11.8882		0	81.0796	0	0		0	118.241	0	0		0	50.6747	0	0		0	199.321	0	0		0	60.8097	0	0		0	128.376	0	0		0	70.9446	0	0
0	78.0223	0	0		0	156.045	0	0		0	64.4532	0	0		0	81.4146	0	0		0	118.73	0	0		0	50.8841	0	0		6.15829	200.144	3.07692	26.534		0	61.061	0	0		0	128.906	0	0		2.96824	71.2378	4.16667	16.9615
8.24668	78.3434	10.5263	1.44349		2.19142	156.687	1.3986	50.3333		0	64.7185	0	0		0	81.7497	0	0		0	119.218	0	0		0	51.0935	0	0		0	200.968	0	0		0	61.3122	0	0		0	129.437	0	0		0	71.531	0	0
0	78.6645	0	0		0	157.329	0	0		0	64.9837	0	0		0	82.0847	0	0		0	119.707	0	0		0	51.3029	0	0		0	201.792	0	0		0	61.5635	0	0		0	129.967	0	0		0	71.8241	0	0
0	78.9856	0	0		0	157.971	0	0		0	65.249	0	0		0	82.4197	0	0		0	120.195	0	0		0	51.5123	0	0		0	202.615	0	0		0	61.8148	0	0		0	130.498	0	0		0	72.1173	0	0
0	79.3067	0	0		0	158.613	0	0		0	65.5142	0	0		0	82.7548	0	0		0	120.684	0	0		0	51.7217	0	0		0	203.439	0	0		0	62.0661	0	0		0	131.028	0	0		0	72.4104	0	0
0	79.6277	0	0		0	159.256	0	0		0	65.7794	0	0		0	83.0898	0	0		2.69272	121.173	2.22222	0.896573		0	51.9311	0	0		0	204.262	0	0		0	62.3174	0	0		0	131.559	0	0		0	72.7036	0	0
0	79.9488	0	0		0	159.898	0	0		0	66.0447	0	0		0	83.4248	0	0		0	121.661	0	0		0	52.1405	0	0		0	205.086	0	0		0	62.5686	0	0		0	132.089	0	0		0	72.9967	0	0
0	80.2699	0	0		0	160.54	0	0		0	66.3099	0	0		0	83.7599	0	0		0	122.15	0	0		0	52.3499	0	0		0	205.91	0	0		0	62.8199	0	0		0	132.62	0	0		0	73.2899	0	0
0	80.591	0	0		0	161.182	0	0		0	66.5751	0	0		0	84.0949	0	0		0	122.638	0	0		0	52.5593	0	0		1.59026	206.733	0.769231	3.99062		0	63.0712	0	0		0	133.15	0	0		0	73.5831	0	0
0	80.912	0	0		0	161.824	0	0		0	66.8404	0	0		0	84.43	0	0		0	123.127	0	0		0	52.7687	0	0		0	207.557	0	0		0	63.3225	0	0		0	133.681	0	0		0	73.8762	0	0
0	81.2331	0	0		0	162.466	0	0		0	67.1056	0	0		0	84.765	0	0		0	123.616	0	0		0	52.9781	0	0		0	208.381	0	0		0	63.5737	0	0		0	134.211	0	0		0	74.1694	0	0
0	81.5542	0	0		0	163.108	0	0		0	67.3709	0	0		0	85.1	0	0		0	124.104	0	0		0	53.1875	0	0		0	209.204	0	0		0	63.825	0	0		0	134.742	0	0		0	74.4625	0	0
0	81.8753	0	0		0	163.751	0	0		0	67.6361	0	0		6.57193	85.4351	7.69231	24.7859		0	124.593	0	0		0	53.3969	0	0		0	210.028	0	0		0	64.0763	0	0		0	135.272	0	0		0	74.7557	0	0
0	82.1964	0	0		2.2992	164.393	1.3986	38.2329		0	67.9013	0	0		0	85.7701	0	0		0	125.081	0	0		0	53.6063	0	0		0	210.851	0	0		4.67837	64.3276	7.27273	1.18361		2.74349	135.803	2.0202	39.5942		0	75.0489	0	0
0	82.5174	0	0		0	165.035	0	0		0	68.1666	0	0		0	86.1052	0	0		0	125.57	0	0		0	53.8157	0	0		0	211.675	0	0		0	64.5789	0	0		0	136.333	0	0		0	75.342	0	0
0	82.8385	0	0		0	165.677	0	0		0	68.4318	0	0		0	86.4402	0	0		0	126.059	0	0		0	54.0251	0	0		0	212.499	0	0		0	64.8302	0	0		0	136.864	0	0		0	75.6352	0	0
0	83.1596	0	0		0	166.319	0	0		0	68.6971	0	0		0	86.7752	0	0		0	126.547	0	0		0	54.2345	0	0		0	213.322	0	0		0	65.0814	0	0		0	137.394	0	0		0	75.9283	0	0
0	83.4807	0	0		0	166.961	0	0		0	68.9623	0	0		0	87.1103	0	0		0	127.036	0	0		0	54.4439	0	0		6.58911	214.146	3.07692	7.26321		0	65.3327	0	0		0	137.925	0	0		0	76.2215	0	0
0	83.8018	0	0		0	167.603	0	0		0	69.2275	0	0		0	87.4453	0	0		0	127.524	0	0		0	54.6533	0	0		0	214.97	0	0		0	65.584	0	0		0	138.455	0	0		0	76.5147	0	0
0	84.1228	0	0		0	168.246	0	0		0	69.4928	0	0		0	87.7804	0	0		0	128.013	0	0		0	54.8627	0	0		0	215.793	0	0		0	65.8353	0	0		0	138.986	0	0		0	76.8078	0	0
0	84.4439	0	0		0	168.888	0	0		0	69.758	0	0		0	88.1154	0	0		7.13898	128.502	5.55556	0.0530475		0	55.0721	0	0		0	216.617	0	0		0	66.0866	0	0		0	139.516	0	0		0	77.101	0	0
0	84.765	0	0		0	169.53	0	0		0	70.0233	0	0		0	88.4505	0	0		0	128.99	0	0		0	55.2815	0	0		0	217.441	0	0		0	66.3378	0	0		0	140.047	0	0		0	77.3941	0	0
0	85.0861	0	0		0	170.172	0	0		0	70.2885	0	0		0	88.7855	0	0		0	129.479	0	0		0	55.4909	0	0		0	218.264	0	0		0	66.5891	0	0		0	140.577	0	0		0	77.6873	0	0
0	85.4072	0	0		0	170.814	0	0		0	70.5537	0	0		0	89.1205	0	0		0	129.967	0	0		0	55.7003	0	0		0	219.088	0	0		0	66.8404	0	0		0	141.107	0	0		0	77.9805	0	0
6.61762	85.7282	7.7193	1.04635		3.59699	171.457	2.0979	42.9		0	70.819	0	0		0	89.4556	0	0		0	130.456	0	0		0	55.9097	0	0		0	219.912	0	0		0	67.0917	0	0		0	141.638	0	0		0	78.2736	0	0
0	86.0493	0	0		0	172.099	0	0		0	71.0842	0	0		0	89.7906	0	0		0	130.945	0	0		0	56.1191	0	0		1.69796	220.735	0.769231	0.592307		0	67.343	0	0		0	142.168	0	0		2.45521	78.5668	3.125	5.15777
0	86.3704	0	0		0	172.741	0	0		5.09639	71.3495	7.14286	18.9402		0	90.1256	0	0		0	131.433	0	0		0	56.3285	0	0		0	221.559	0	0		0	67.5942	0	0		2.88281	142.699	2.0202	28.2196		0	78.8599	0	0
0	86.6915	0	0		0	173.383	0	0		0	71.6147	0	0		0	90.4607	0	0		0	131.922	0	0		0	56.5379	0	0		0	222.382	0	0		0	67.8455	0	0		0	143.229	0	0		0	79.1531	0	0
0	87.0126	0	0		0	174.025	0	0		0	71.8799	0	0		0	90.7957	0	0		0	132.41	0	0		0	56.7473	0	0		0	223.206	0	0		0	68.0968	0	0		0	143.76	0	0		0	79.4463	0	0
0	87.3336	0	0		0	174.667	0	0		0	72.1452	0	0		0	91.1308	0	0		0	132.899	0	0		0	56.9567	0	0		0	224.03	0	0		0	68.3481	0	0		0	144.29	0	0		0	79.7394	0	0
0	87.6547	0	0		0	175.31	0	0		0	72.4104	0	0		0	91.4658	0	0		0	133.388	0	0		7.86034	57.1661	13.75	3.45351		0	224.853	0	0		0	68.5994	0	0		0	144.821	0	0		0	80.0326	0	0
0	87.9758	0	0		0	175.952	0	0		0	72.6757	0	0		0	91.8008	0	0		0	133.876	0	0		0	57.3755	0	0		0	225.677	0	0		0	68.8506	0	0		0	145.351	0	0		0	80.3257	0	0
0	88.2969	0	0		0	176.594	0	0		0	72.9409	0	0		0	92.1359	0	0		0	134.365	0	0		0	57.5849	0	0		0	226.501	0	0		0	69.1019	0	0		0	145.882	0	0		0	80.6189	0	0
0	88.618	0	0		0	177.236	0	0		0	73.2061	0	0		0	92.4709	0	0		0	134.853	0	0		0	57.7943	0	0		0	227.324	0	0		0	69.3532	0	0		0	146.412	0	0		0	80.912	0	0
0	88.939	0	0		0	177.878	0	0		0	73.4714	0	0		10.7084	92.806	11.5385	12.9145		4.5114	135.342	3.33333	2.03714		0	58.0037	0	0		1.75498	228.148	0.769231	0.014273		0	69.6045	0	0		0	146.943	0	0		0	81.2052	0	0
0	89.2601	0	0		4.99358	178.52	2.7972	40.7256		0	73.7366	0	0		0	93.141	0	0		0	135.831	0	0		0	58.2131	0	0		0	228.972	0	0		0	69.8558	0	0		0	147.473	0	0		0	81.4984	0	0
0	89.5812	0	0		0	179.162	0	0		0	74.0019	0	0		0	93.476	0	0		0	136.319	0	0		0	58.4225	0	0		0	229.795	0	0		0	70.107	0	0		0	148.004	0	0		0	81.7915	0	0
0	89.9023	0	0		0	179.805	0	0		0	74.2671	0	0		0	93.8111	0	0		0	136.808	0	0		0	58.6319	0	0		0	230.619	0	0		0	70.3583	0	0		0	148.534	0	0		0	82.0847	0	0
0	90.2234	0	0		0	180.447	0	0		0	74.5323	0	0		0	94.1461	0	0		0	137.296	0	0		0	58.8413	0	0		0	231.442	0	0		0	70.6096	0	0		0	149.065	0	0		0	82.3778	0	0
0	90.5444	0	0		0	181.089	0	0		0	74.7976	0	0		0	94.4811	0	0		0	137.785	0	0		0	59.0507	0	0		0	232.266	0	0		0	70.8609	0	0		4.53319	149.595	3.0303	28.1495		0	82.671	0	0
0	90.8655	0	0		0	181.731	0	0		0	75.0628	0	0		0	94.8162	0	0		0	138.274	0	0		0	59.2601	0	0		0	233.09	0	0		0	71.1121	0	0		0	150.126	0	0		0	82.9642	0	0
0	91.1866	0	0		0	182.373	0	0		0	75.3281	0	0		0	95.1512	0	0		0	138.762	0	0		0	59.4695	0	0		0	233.913	0	0		6.48758	71.3634	9.09091	0.819086		0	150.656	0	0		0	83.2573	0	0
0	91.5077	0	0		0	183.015	0	0		0	75.5933	0	0		0	95.4863	0	0		0	139.251	0	0		0	59.6789	0	0		0	234.737	0	0		0	71.6147	0	0		0	151.187	0	0		0	83.5505	0	0
0	91.8288	0	0		0	183.657	0	0		0	75.8585	0	0		0	95.8213	0	0		0	139.739	0	0		0	59.8883	0	0		0	235.561	0	0		0	71.866	0	0		0	151.717	0	0		0	83.8436	0	0
0	92.1498	0	0		0	184.3	0	0		0	76.1238	0	0		0	96.1563	0	0		0	140.228	0	0		0	60.0977	0	0		0	236.384	0	0		0	72.1173	0	0		0	152.248	0	0		0	84.1368	0	0
0	92.4709	0	0		0	184.942	0	0		0	76.389	0	0		0	96.4914	0	0		0	140.717	0	0		0	60.3071	0	0		0	237.208	0	0		0	72.3685	0	0		0	152.778	0	0		0	84.43	0	0
10.4187	92.792	11.2281	12.9645		5.19116	185.584	2.7972	27.0428		0	76.6543	0	0		0	96.8264	0	0		0	141.205	0	0		0	60.5165	0	0		0	238.032	0	0		0	72.6198	0	0		0	153.309	0	0		0	84.7231	0	0
0	93.1131	0	0		0	186.226	0	0		0	76.9195	0	0		0	97.1615	0	0		0	141.694	0	0		0	60.7259	0	0		0	238.855	0	0		0	72.8711	0	0		0	153.839	0	0		0	85.0163	0	0
0	93.4342	0	0		0	186.868	0	0		0	77.1847	0	0		0	97.4965	0	0		0	142.182	0	0		0	60.9353	0	0		0	239.679	0	0		0	73.1224	0	0		0	154.369	0	0		0	85.3094	0	0
0	93.7552	0	0		0	187.511	0	0		0	77.45	0	0		0	97.8315	0	0		11.0966	142.671	7.77778	17.8437		0	61.1447	0	0		0	240.502	0	0		0	73.3737	0	0		0	154.9	0	0		5.35016	85.6026	6.25	2.11069
0	94.0763	0	0		0	188.153	0	0		0	77.7152	0	0		0	98.1666	0	0		0	143.16	0	0		0	61.3541	0	0		0	241.326	0	0		0	73.6249	0	0		0	155.43	0	0		0	85.8958	0	0
0	94.3974	0	0		0	188.795	0	0		0	77.9805	0	0		0	98.5016	0	0		0	143.648	0	0		0	61.5635	0	0		3.72538	242.15	1.53846	2.45785		0	73.8762	0	0		0	155.961	0	0		0	86.1889	0	0
0	94.7185	0	0		0	189.437	0	0		0	78.2457	0	0		0	98.8367	0	0		0	144.137	0	0		0	61.7729	0	0		0	242.974	0	0		0	74.1275	0	0		0	156.491	0	0		0	86.4821	0	0
0	95.0396	0	0		0	190.079	0	0		2.80396	78.5109	3.57143	19.6315		0	99.1717	0	0		0	144.625	0	0		0	61.9823	0	0		0	243.797	0	0		0	74.3788	0	0		3.17216	157.022	2.0202	10.735		0	86.7752	0	0
0	95.3606	0	0		0	190.721	0	0		0	78.7762	0	0		0	99.5067	0	0		0	145.114	0	0		0	62.1917	0	0		0	244.621	0	0		0	74.6301	0	0		0	157.552	0	0		0	87.0684	0	0
0	95.6817	0	0		0	191.363	0	0		0	79.0414	0	0		8.22872	99.8418	8.24176	1.03498		0	145.603	0	0		0	62.4011	0	0		0	245.444	0	0		0	74.8813	0	0		0	158.083	0	0		0	87.3616	0	0
0	96.0028	0	0		0	192.006	0	0		0	79.3067	0	0		0	100.177	0	0		0	146.091	0	0		0	62.6105	0	0		0	246.268	0	0		0	75.1326	0	0		0	158.613	0	0		0	87.6547	0	0
0	96.3239	0	0		8.08312	192.648	4.1958	24.227		0	79.5719	0	0		0	100.512	0	0		0	146.58	0	0		0	62.8199	0	0		0	247.092	0	0		0	75.3839	0	0		0	159.144	0	0		0	87.9479	0	0
0	96.6449	0	0		0	193.29	0	0		0	79.8371	0	0		0	100.847	0	0		0	147.068	0	0		0	63.0293	0	0		0	247.915	0	0		0	75.6352	0	0		0	159.674	0	0		0	88.2411	0	0
0	96.966	0	0		0	193.932	0	0		0	80.1024	0	0		0	101.182	0	0		0	147.557	0	0		0	63.2387	0	0		0	248.739	0	0		0	75.8864	0	0		0	160.205	0	0		0	88.5342	0	0
0	97.2871	0	0		0	194.574	0	0		0	80.3676	0	0		0	101.517	0	0		0	148.046	0	0		0	63.4481	0	0		3.83943	249.563	1.53846	6.18616		0	76.1377	0	0		0	160.735	0	0		0	88.8274	0	0
0	97.6082	0	0		0	195.216	0	0		0	80.6329	0	0		0	101.852	0	0		0	148.534	0	0		0	63.6575	0	0		0	250.386	0	0		0	76.389	0	0		0	161.266	0	0		0	89.1205	0	0
0	97.9293	0	0		0	195.858	0	0		0	80.8981	0	0		0	102.187	0	0		0	149.023	0	0		0	63.8669	0	0		0	251.21	0	0		0	76.6403	0	0		0	161.796	0	0		0	89.4137	0	0
0	98.2503	0	0		0	196.501	0	0		0	81.1633	0	0		0	102.522	0	0		0	149.511	0	0		0	64.0763	0	0		0	252.034	0	0		0	76.8916	0	0		0	162.327	0	0		0	89.7068	0	0
0	98.5714	0	0		0	197.143	0	0		0	81.4286	0	0		0	102.857	0	0		11.6667	150	7.77778	39.2895		11.25	64.2857	17.5	0.777611		0	252.857	0	0		0	77.1429	0	0		0	162.857	0	0		0	90	0	0
0	98.8925	0	0		0	197.785	0	0		0	81.6938	0	0		0	103.192	0	0		0	150.489	0	0		0	64.4951	0	0		0	253.681	0	0		0	77.3941	0	0		0	163.388	0	0		0	90.2932	0	0
0	99.2136	0	0		0	198.427	0	0		0	81.9591	0	0		0	103.527	0	0		0	150.977	0	0		0	64.7045	0	0		0	254.504	0	0		0	77.6454	0	0		11.5902	163.918	7.07071	18.4546		0	90.5863	0	0
0	99.5347	0	0		0	199.069	0	0		0	82.2243	0	0		0	103.862	0	0		0	151.466	0	0		0	64.9139	0	0		0	255.328	0	0		0	77.8967	0	0		0	164.449	0	0		0	90.8795	0	0
6.65705	99.8557	6.66667	21.1445		13.9658	199.712	6.99301	20.128		0	82.4895	0	0		0	104.197	0	0		0	151.954	0	0		0	65.1233	0	0		0	256.152	0	0		0	78.148	0	0		0	164.979	0	0		0	91.1726	0	0
0	100.177	0	0		0	200.354	0	0		0	82.7548	0	0		0	104.532	0	0		0	152.443	0	0		0	65.3327	0	0		1.97673	256.975	0.769231	5.80257		9.26537	78.3993	11.8182	11.907		0	165.51	0	0		0	91.4658	0	0
0	100.498	0	0		0	200.996	0	0		0	83.02	0	0		0	104.867	0	0		0	152.932	0	0		0	65.5421	0	0		0	257.799	0	0		0	78.6505	0	0		0	166.04	0	0		0	91.7589	0	0
0	100.819	0	0		0	201.638	0	0		0	83.2853	0	0		0	105.202	0	0		0	153.42	0	0		0	65.7515	0	0		0	258.623	0	0		0	78.9018	0	0		0	166.571	0	0		0	92.0521	0	0
0	101.14	0	0		0	202.28	0	0		0	83.5505	0	0		0	105.537	0	0		0	153.909	0	0		0	65.9609	0	0		0	259.446	0	0		0	79.1531	0	0		0	167.101	0	0		0	92.3453	0	0
0	101.461	0	0		0	202.922	0	0		0	83.8157	0	0		0	105.873	0	0		0	154.397	0	0		0	66.1703	0	0		0	260.27	0	0		0	79.4044	0	0		0	167.631	0	0		3.85994	92.6384	4.16667	0.0624799
0	101.782	0	0		0	203.565	0	0		0	84.081	0	0		0	106.207	0	0		0	154.886	0	0		0	66.3797	0	0		0	261.094	0	0		0	79.6556	0	0		0	168.162	0	0		0	92.9316	0	0
0	102.103	0	0		0	204.207	0	0		0	84.3462	0	0		0	106.543	0	0		0	155.375	0	0		0	66.5891	0	0		0	261.917	0	0		0	79.9069	0	0		0	168.692	0	0		0	93.2248	0	0
0	102.424	0	0		0	204.849	0	0		0	84.6115	0	0		8.80859	106.878	8.24176	1.00508		0	155.863	0	0		0	66.7985	0	0		0	262.741	0	0		0	80.1582	0	0		0	169.223	0	0		0	93.5179	0	0
0	102.746	0	0		0	205.491	0	0		0	84.8767	0	0		0	107.213	0	0		0	156.352	0	0		0	67.0079	0	0		0	263.564	0	0		0	80.4095	0	0		0	169.753	0	0		0	93.8111	0	0
0	103.067	0	0		0	206.133	0	0		0	85.1419	0	0		0	107.548	0	0		10.456	156.84	6.66667	57.2951		0	67.2173	0	0		0	264.388	0	0		0	80.6608	0	0		0	170.284	0	0		0	94.1042	0	0
0	103.388	0	0		11.5678	206.775	5.59441	5.48514		0	85.4072	0	0		0	107.883	0	0		0	157.329	0	0		0	67.4267	0	0		0	265.212	0	0		0	80.912	0	0		0	170.814	0	0		0	94.3974	0	0
0	103.709	0	0		0	207.417	0	0		5.50751	85.6724	6.42857	60.2212		0	108.218	0	0		0	157.818	0	0		0	67.6361	0	0		0	266.035	0	0		0	81.1633	0	0		5.19227	171.345	3.0303	2.30885		0	94.6906	0	0
0	104.03	0	0		0	208.06	0	0		0	85.9376	0	0		0	108.553	0	0		0	158.306	0	0		0	67.8455	0	0		0	266.859	0	0		0	81.4146	0	0		0	171.875	0	0		0	94.9837	0	0
0	104.351	0	0		0	208.702	0	0		0	86.2029	0	0		0	108.888	0	0		0	158.795	0	0		0	68.0549	0	0		0	267.683	0	0		0	81.6659	0	0		0	172.406	0	0		0	95.2769	0	0
0	104.672	0	0		0	209.344	0	0		0	86.4681	0	0		0	109.223	0	0		0	159.283	0	0		0	68.2643	0	0		0	268.506	0	0		0	81.9172	0	0		0	172.936	0	0		0	95.57	0	0
0	104.993	0	0		0	209.986	0	0		0	86.7334	0	0		0	109.558	0	0		0	159.772	0	0		0	68.4737	0	0		0	269.33	0	0		0	82.1685	0	0		0	173.467	0	0		0	95.8632	0	0
0	105.314	0	0		0	210.628	0	0		0	86.9986	0	0		0	109.893	0	0		0	160.261	0	0		0	68.6831	0	0		0	270.154	0	0		0	82.4197	0	0		0	173.997	0	0		0	96.1564	0	0
0	105.635	0	0		0	211.27	0	0		0	87.2638	0	0		0	110.228	0	0		0	160.749	0	0		0	68.8925	0	0		0	270.977	0	0		0	82.671	0	0		0	174.528	0	0		0	96.4495	0	0
0	105.956	0	0		0	211.912	0	0		0	87.5291	0	0		0	110.563	0	0		0	161.238	0	0		0	69.1019	0	0		0	271.801	0	0		0	82.9223	0	0		0	175.058	0	0		0	96.7427	0	0
0	106.277	0	0		0	212.555	0	0		0	87.7943	0	0		0	110.898	0	0		0	161.726	0	0		0	69.3113	0	0		0	272.625	0	0		0	83.1736	0	0		0	175.589	0	0		0	97.0358	0	0
0	106.598	0	0		0	213.197	0	0		0	88.0596	0	0		0	111.233	0	0		0	162.215	0	0		0	69.5207	0	0		0	273.448	0	0		0	83.4248	0	0		0	176.119	0	0		0	97.329	0	0
7.87828	106.919	7.36842	45.5858		5.98151	213.839	2.7972	0.225304		0	88.3248	0	0		0	111.568	0	0		0	162.704	0	0		0	69.7301	0	0		0	274.272	0	0		0	83.6761	0	0		0	176.65	0	0		0	97.6222	0	0
0	107.241	0	0		0	214.481	0	0		0	88.5901	0	0		0	111.903	0	0		0	163.192	0	0		0	69.9395	0	0		0	275.095	0	0		0	83.9274	0	0		0	177.18	0	0		0	97.9153	0	0
0	107.562	0	0		0	215.123	0	0		0	88.8553	0	0		0	112.238	0	0		0	163.681	0	0		0	70.1489	0	0		0	275.919	0	0		0	84.1787	0	0		0	177.711	0	0		0	98.2085	0	0
0	107.883	0	0		0	215.766	0	0		0	89.1205	0	0		0	112.573	0	0		9.12052	164.169	5.55556	74.603		0	70.3583	0	0		0	276.743	0	0		0	84.43	0	0		5.40124	178.241	3.0303	0.101772		0	98.5016	0	0
0	108.204	0	0		0	216.408	0	0		0	89.3858	0	0		0	112.908	0	0		0	164.658	0	0		0	70.5677	0	0		0	277.566	0	0		0	84.6813	0	0		0	178.772	0	0		0	98.7948	0	0
0	108.525	0	0		0	217.05	0	0		0	89.651	0	0		0	113.243	0	0		0	165.147	0	0		0	70.7771	0	0		2.14146	278.39	0.769231	18.3787		0	84.9325	0	0		0	179.302	0	0		0	99.088	0	0
0	108.846	0	0		0	217.692	0	0		0	89.9162	0	0		0	113.578	0	0		0	165.635	0	0		0	70.9865	0	0		0	279.214	0	0		0	85.1838	0	0		0	179.833	0	0		0	99.3811	0	0
0	109.167	0	0		0	218.334	0	0		0	90.1815	0	0		0	113.913	0	0		0	166.124	0	0		0	71.1959	0	0		0	280.037	0	0		0	85.4351	0	0		0	180.363	0	0		0	99.6743	0	0
0	109.488	0	0		0	218.976	0	0		0	90.4467	0	0		6.27739	114.249	5.49451	6.48382		0	166.612	0	0		7.73557	71.4053	10.8333	9.22433		0	280.861	0	0		5.45277	85.6864	6.36364	19.0999		0	180.893	0	0		6.24796	99.9674	6.25	4.57269
0	109.809	0	0		0	219.618	0	0		0	90.712	0	0		0	114.584	0	0		0	167.101	0	0		0	71.6147	0	0		0	281.685	0	0		0	85.9376	0	0		0	181.424	0	0		0	100.261	0	0
0	110.13	0	0		0	220.261	0	0		0	90.9772	0	0		0	114.919	0	0		0	167.59	0	0		0	71.8241	0	0		0	282.508	0	0		0	86.1889	0	0		0	181.954	0	0		0	100.554	0	0
0	110.451	0	0		10.8134	220.903	4.89511	0.874112		0	91.2424	0	0		0	115.254	0	0		0	168.078	0	0		0	72.0335	0	0		0	283.332	0	0		0	86.4402	0	0		0	182.485	0	0		0	100.847	0	0
0	110.772	0	0		0	221.545	0	0		0	91.5077	0	0		0	115.589	0	0		0	168.567	0	0		0	72.2429	0	0		0	284.155	0	0		0	86.6915	0	0		0	183.015	0	0		0	101.14	0	0
0	111.094	0	0		0	222.187	0	0		0	91.7729	0	0		0	115.924	0	0		0	169.055	0	0		0	72.4523	0	0		2.19215	284.979	0.769231	23.6677		0	86.9428	0	0		0	183.546	0	0		0	101.433	0	0
0	111.415	0	0		0	222.829	0	0		0	92.0382	0	0		0	116.259	0	0		0	169.544	0	0		0	72.6617	0	0		0	285.803	0	0		0	87.1941	0	0		0	184.076	0	0		0	101.726	0	0
0	111.736	0	0		0	223.471	0	0		0	92.3034	0	0		0	116.594	0	0		0	170.033	0	0		0	72.8711	0	0		0	286.626	0	0		0	87.4453	0	0		0	184.607	0	0		0	102.019	0	0
0	112.057	0	0		0	224.113	0	0		0	92.5686	0	0		0	116.929	0	0		0	170.521	0	0		0	73.0805	0	0		0	287.45	0	0		0	87.6966	0	0		0	185.137	0	0		0	102.313	0	0
0	112.378	0	0		0	224.756	0	0		1.3262	92.8339	1.42857	20.3777		0	117.264	0	0		11.4007	171.01	6.66667	126.065		0	73.2899	0	0		0	288.274	0	0		0	87.9479	0	0		16.8789	185.668	9.09091	2.84499		0	102.606	0	0
0	112.699	0	0		0	225.398	0	0		0	93.0991	0	0		0	117.599	0	0		0	171.498	0	0		0	73.4993	0	0		0	289.097	0	0		0	88.1992	0	0		0	186.198	0	0		0	102.899	0	0
0	113.02	0	0		0	226.04	0	0		0	93.3644	0	0		0	117.934	0	0		0	171.987	0	0		0	73.7087	0	0		0	289.921	0	0		0	88.4505	0	0		0	186.729	0	0		0	103.192	0	0
0	113.341	0	0		0	226.682	0	0		0	93.6296	0	0		0	118.269	0	0		0	172.476	0	0		0	73.9181	0	0		0	290.745	0	0		0	88.7017	0	0		0	187.259	0	0		0	103.485	0	0
0	113.662	0	0		0	227.324	0	0		0	93.8948	0	0		0	118.604	0	0		0	172.964	0	0		0	74.1275	0	0		0	291.568	0	0		0	88.953	0	0		0	187.79	0	0		0	103.778	0	0
5.99912	113.983	5.26316	53.6816		11.1592	227.966	4.89511	6.23888		0	94.1601	0	0		0	118.939	0	0		0	173.453	0	0		0	74.3369	0	0		4.49834	292.392	1.53846	60.8323		0	89.2043	0	0		0	188.32	0	0		0	104.072	0	0
0	114.304	0	0		0	228.609	0	0		0	94.4253	0	0		0	119.274	0	0		0	173.941	0	0		0	74.5463	0	0		0	293.215	0	0		0	89.4556	0	0		0	188.851	0	0		0	104.365	0	0
0	114.625	0	0		0	229.251	0	0		0	94.6906	0	0		0	119.609	0	0		0	174.43	0	0		0	74.7557	0	0		0	294.039	0	0		0	89.7068	0	0		0	189.381	0	0		0	104.658	0	0
0	114.947	0	0		0	229.893	0	0		0	94.9558	0	0		0	119.944	0	0		0	174.919	0	0		0	74.9651	0	0		0	294.863	0	0		0	89.9581	0	0		0	189.912	0	0		0	104.951	0	0
0	115.268	0	0		0	230.535	0	0		0	95.221	0	0		0	120.279	0	0		0	175.407	0	0		0	75.1745	0	0		0	295.686	0	0		0	90.2094	0	0		0	190.442	0	0		0	105.244	0	0
0	115.589	0	0		0	231.177	0	0		0	95.4863	0	0		0	120.614	0	0		0	175.896	0	0		0	75.3839	0	0		0	296.51	0	0		0	90.4607	0	0		0	190.972	0	0		0	105.537	0	0
0	115.91	0	0		0	231.82	0	0		0	95.7515	0	0		0	120.949	0	0		0	176.384	0	0		0	75.5933	0	0		0	297.334	0	0		0	90.712	0	0		0	191.503	0	0		0	105.831	0	0
0	116.231	0	0		0	232.462	0	0		0	96.0168	0	0		8.66317	121.284	7.14286	22.8834		0	176.873	0	0		0	75.8027	0	0		0	298.157	0	0		0	90.9632	0	0		0	192.034	0	0		0	106.124	0	0
0	116.552	0	0		0	233.104	0	0		0	96.282	0	0		0	121.619	0	0		0	177.362	0	0		0	76.0121	0	0		0	298.981	0	0		0	91.2145	0	0		11.6705	192.564	6.06061	9.45514		0	106.417	0	0
0	116.873	0	0		0	233.746	0	0		0	96.5472	0	0		0	121.954	0	0		0	177.85	0	0		0	76.2215	0	0		6.91856	299.805	2.30769	114.03		0	91.4658	0	0		0	193.095	0	0		0	106.71	0	0
0	117.194	0	0		0	234.388	0	0		0	96.8125	0	0		0	122.289	0	0		5.94463	178.339	3.33333	86.07		0	76.4309	0	0		0	300.628	0	0		0	91.7171	0	0		0	193.625	0	0		5.57309	107.003	5.20833	12.6578
0	117.515	0	0		0	235.03	0	0		0	97.0777	0	0		0	122.624	0	0		0	178.827	0	0		0	76.6403	0	0		0	301.452	0	0		0	91.9684	0	0		0	194.155	0	0		0	107.296	0	0
0	117.836	0	0		13.1845	235.672	5.59441	20.1859		0	97.343	0	0		0	122.96	0	0		0	179.316	0	0		0	76.8497	0	0		0	302.276	0	0		0	92.2196	0	0		0	194.686	0	0		0	107.59	0	0
0	118.157	0	0		0	236.315	0	0		0	97.6082	0	0		0	123.294	0	0		0	179.805	0	0		0	77.0591	0	0		0	303.099	0	0		0	92.4709	0	0		0	195.216	0	0		0	107.883	0	0
0	118.478	0	0		0	236.957	0	0		0	97.8734	0	0		0	123.63	0	0		0	180.293	0	0		0	77.2685	0	0		0	303.923	0	0		6.74343	92.7222	7.27273	43.1586		0	195.747	0	0		0	108.176	0	0
0	118.799	0	0		0	237.599	0	0		0	98.1387	0	0		0	123.965	0	0		0	180.782	0	0		0	77.4779	0	0		0	304.746	0	0		0	92.9735	0	0		0	196.277	0	0		0	108.469	0	0
0	119.121	0	0		0	238.241	0	0		0	98.4039	0	0		0	124.3	0	0		0	181.27	0	0		0	77.6873	0	0		0	305.57	0	0		0	93.2248	0	0		0	196.808	0	0		0	108.762	0	0
0	119.442	0	0		0	238.883	0	0		0	98.6692	0	0		0	124.635	0	0		0	181.759	0	0		0	77.8967	0	0		9.4275	306.394	3.07692	181.879		0	93.476	0	0		0	197.338	0	0		0	109.055	0	0
0	119.763	0	0		0	239.525	0	0		0	98.9344	0	0		0	124.97	0	0		0	182.248	0	0		0	78.1061	0	0		0	307.217	0	0		0	93.7273	0	0		0	197.869	0	0		0	109.349	0	0
0	120.084	0	0		0	240.167	0	0		0	99.1996	0	0		0	125.305	0	0		0	182.736	0	0		0	78.3155	0	0		0	308.041	0	0		0	93.9786	0	0		0	198.399	0	0		0	109.642	0	0
0	120.405	0	0		0	240.81	0	0		0	99.4649	0	0		0	125.64	0	0		0	183.225	0	0		11.7787	78.5249	15	40.0843		0	308.865	0	0		0	94.2299	0	0		0	198.93	0	0		0	109.935	0	0
0	120.726	0	0		0	241.452	0	0		0	99.7301	0	0		0	125.975	0	0		0	183.713	0	0		0	78.7343	0	0		0	309.688	0	0		0	94.4811	0	0		0	199.46	0	0		0	110.228	0	0
0	121.047	0	0		0	242.094	0	0		3.57126	99.9953	3.57143	72.0956		0	126.31	0	0		0	184.202	0	0		0	78.9437	0	0		0	310.512	0	0		0	94.7324	0	0		14.1408	199.991	7.07071	28.0488		0	110.521	0	0
4.25853	121.368	3.50877	54.2521		11.8822	242.736	4.89511	33.2414		0	100.261	0	0		0	126.645	0	0		0	184.691	0	0		0	79.1531	0	0		0	311.336	0	0		0	94.9837	0	0		0	200.521	0	0		0	110.814	0	0
0	121.689	0	0		0	243.378	0	0		0	100.526	0	0		0	126.98	0	0		0	185.179	0	0		0	79.3625	0	0		0	312.159	0	0		0	95.235	0	0		0	201.052	0	0		0	111.108	0	0
0	122.01	0	0		0	244.02	0	0		0	100.791	0	0		0	127.315	0	0		4.12595	185.668	2.22222	75.1256		0	79.5719	0	0		0	312.983	0	0		0	95.4863	0	0		0	201.582	0	0		0	111.401	0	0
0	122.331	0	0		0	244.663	0	0		0	101.056	0	0		0	127.65	0	0		0	186.156	0	0		0	79.7813	0	0		12.0695	313.806	3.84615	273.302		0	95.7375	0	0		0	202.113	0	0		0	111.694	0	0
0	122.652	0	0		0	245.305	0	0		0	101.322	0	0		0	127.985	0	0		0	186.645	0	0		0	79.9907	0	0		0	314.63	0	0		0	95.9888	0	0		0	202.643	0	0		0	111.987	0	0
0	122.974	0	0		0	245.947	0	0		0	101.587	0	0		11.2809	128.32	8.79121	54.6581		0	187.134	0	0		0	80.2001	0	0		0	315.454	0	0		0	96.2401	0	0		0	203.174	0	0		0	112.28	0	0
0	123.294	0	0		0	246.589	0	0		0	101.852	0	0		0	128.655	0	0		0	187.622	0	0		0	80.4095	0	0		0	316.277	0	0		0	96.4914	0	0		0	203.704	0	0		0	112.573	0	0
0	123.616	0	0		0	247.231	0	0		0	102.117	0	0		0	128.99	0	0		0	188.111	0	0		0	80.6189	0	0		0	317.101	0	0		0	96.7427	0	0		0	204.234	0	0		0	112.866	0	0
0	123.937	0	0		0	247.873	0	0		0	102.382	0	0		0	129.325	0	0		0	188.599	0	0		0	80.8283	0	0		0	317.925	0	0		0	96.9939	0	0		0	204.765	0	0		0	113.16	0	0
0	124.258	0	0		0	248.516	0	0		0	102.648	0	0		0	129.66	0	0		0	189.088	0	0		0	81.0377	0	0		0	318.748	0	0		0	97.2452	0	0		0	205.296	0	0		0	113.453	0	0
0	124.579	0	0		0	249.158	0	0		0	102.913	0	0		0	129.995	0	0		0	189.577	0	0		0	81.2471	0	0		0	319.572	0	0		0	97.4965	0	0		0	205.826	0	0		0	113.746	0	0
0	124.9	0	0		8.73426	249.8	3.4965	38.3609		0	103.178	0	0		0	130.33	0	0		0	190.065	0	0		0	81.4565	0	0		0	320.396	0	0		0	97.7478	0	0		0	206.356	0	0		8.31535	114.039	7.29167	37.326
0	125.221	0	0		0	250.442	0	0		0	103.444	0	0		0	130.665	0	0		0	190.554	0	0		0	81.6659	0	0		12.3546	321.219	3.84615	323.483		0	97.9991	0	0		16.7181	206.887	8.08081	58.0972		0	114.332	0	0
0	125.542	0	0		0	251.084	0	0		0	103.709	0	0		0	131	0	0		0	191.042	0	0		0	81.8753	0	0		0	322.043	0	0		0	98.2503	0	0		0	207.417	0	0		0	114.625	0	0
0	125.863	0	0		0	251.726	0	0		0	103.974	0	0		0	131.335	0	0		0	191.531	0	0		0	82.0847	0	0		0	322.866	0	0		0	98.5016	0	0		0	207.948	0	0		0	114.919	0	0
0	126.184	0	0		0	252.369	0	0		0	104.239	0	0		0	131.671	0	0		0	192.019	0	0		0	82.2941	0	0		0	323.69	0	0		0	98.7529	0	0		0	208.478	0	0		0	115.212	0	0
0	126.505	0	0		0	253.011	0	0		0	104.504	0	0		0	132.006	0	0		14.9729	192.508	7.77778	328.446		0	82.5035	0	0		0	324.514	0	0		0	99.0042	0	0		0	209.009	0	0		0	115.505	0	0
0	126.826	0	0		0	253.653	0	0		0	104.77	0	0		0	132.341	0	0		0	192.997	0	0		0	82.7129	0	0		0	325.337	0	0		0	99.2555	0	0		0	209.539	0	0		0	115.798	0	0
0	127.147	0	0		0	254.295	0	0		0	105.035	0	0		0	132.676	0	0		0	193.485	0	0		0	82.9223	0	0		0	326.161	0	0		0	99.5067	0	0		0	210.07	0	0		0	116.091	0	0
0	127.469	0	0		0	254.937	0	0		0	105.3	0	0		0	133.011	0	0		0	193.974	0	0		0	83.1317	0	0		0	326.985	0	0		3.62756	99.758	3.63636	35.8445		0	210.6	0	0		0	116.384	0	0
0	127.79	0	0		0	255.579	0	0		0	105.565	0	0		0	133.346	0	0		0	194.463	0	0		0	83.3411	0	0		5.04321	327.808	1.53846	148.654		0	100.009	0	0		0	211.131	0	0		0	116.677	0	0
0	128.111	0	0		0	256.221	0	0		0	105.831	0	0		0	133.681	0	0		0	194.951	0	0		0	83.5505	0	0		0	328.632	0	0		0	100.261	0	0		0	211.661	0	0		0	116.971	0	0
2.25319	128.432	1.75439	37.7472		17.9625	256.864	6.99301	112.934		0	106.096	0	0		0	134.016	0	0		0	195.44	0	0		0	83.7599	0	0		0	329.456	0	0		0	100.512	0	0		0	212.192	0	0		0	117.264	0	0
0	128.753	0	0		0	257.506	0	0		0	106.361	0	0		0	134.351	0	0		0	195.928	0	0		0	83.9693	0	0		0	330.279	0	0		0	100.763	0	0		0	212.722	0	0		0	117.557	0	0
0	129.074	0	0		0	258.148	0	0		0	106.626	0	0		0	134.686	0	0		0	196.417	0	0		0	84.1787	0	0		0	331.103	0	0		0	101.014	0	0		0	213.253	0	0		0	117.85	0	0
0	129.395	0	0		0	258.79	0	0		0.763511	106.892	0.714286	19.1852		0	135.021	0	0		0	196.905	0	0		0	84.3881	0	0		0	331.926	0	0		0	101.266	0	0		12.9566	213.783	6.06061	68.8689		0	118.143	0	0
0	129.716	0	0		0	259.432	0	0		0	107.157	0	0		0	135.356	0	0		0	197.394	0	0		0	84.5975	0	0		0	332.75	0	0		0	101.517	0	0		0	214.314	0	0		0	118.436	0	0
0	130.037	0	0		0	260.074	0	0		0	107.422	0	0		8.2011	135.691	6.04396	63.0776		0	197.883	0	0		0	84.8069	0	0		0	333.574	0	0		0	101.768	0	0		0	214.844	0	0		0	118.73	0	0
0	130.358	0	0		0	260.717	0	0		0	107.687	0	0		0	136.026	0	0		0	198.371	0	0		0	85.0163	0	0		0	334.397	0	0		0	102.019	0	0		0	215.375	0	0		0	119.023	0	0
0	130.679	0	0		0	261.359	0	0		0	107.953	0	0		0	136.361	0	0		0	198.86	0	0		0	85.2257	0	0		0	335.221	0	0		0	102.271	0	0		0	215.905	0	0		0	119.316	0	0
0	131	0	0		0	262.001	0	0		0	108.218	0	0		0	136.696	0	0		0	199.349	0	0		0	85.4351	0	0		0	336.045	0	0		0	102.522	0	0		0	216.436	0	0		0	119.609	0	0
0	131.321	0	0		0	262.643	0	0		0	108.483	0	0		0	137.031	0	0		0	199.837	0	0		6.42334	85.6445	7.5	41.3016		0	336.868	0	0		0	102.773	0	0		0	216.966	0	0		0	119.902	0	0
0	131.643	0	0		0	263.285	0	0		0	108.748	0	0		0	137.366	0	0		0	200.326	0	0		0	85.8539	0	0		0	337.692	0	0		0	103.025	0	0		0	217.496	0	0		0	120.195	0	0
0	131.964	0	0		11.0739	263.927	4.1958	93.6753		0	109.013	0	0		0	137.701	0	0		0	200.814	0	0		0	86.0633	0	0		0	338.516	0	0		0	103.276	0	0		0	218.027	0	0		0	120.489	0	0
0	132.285	0	0		0	264.57	0	0		0	109.279	0	0		0	138.036	0	0		0	201.303	0	0		0	86.2727	0	0		0	339.339	0	0		0	103.527	0	0		0	218.558	0	0		0	120.782	0	0
0	132.606	0	0		0	265.212	0	0		0	109.544	0	0		0	138.371	0	0		0	201.792	0	0		0	86.4821	0	0		0	340.163	0	0		0	103.778	0	0		0	219.088	0	0		0	121.075	0	0
0	132.927	0	0		0	265.854	0	0		0	109.809	0	0		0	138.706	0	0		0	202.28	0	0		0	86.6915	0	0		0	340.986	0	0		0	104.03	0	0		0	219.618	0	0		11.3783	121.368	9.375	84.1176
0	133.248	0	0		0	266.496	0	0		0	110.075	0	0		0	139.041	0	0		0	202.769	0	0		0	86.9009	0	0		0	341.81	0	0		0	104.281	0	0		0	220.149	0	0		0	121.661	0	0
0	133.569	0	0		0	267.138	0	0		0	110.34	0	0		0	139.376	0	0		0	203.257	0	0		0	87.1103	0	0		18.4495	342.634	5.38462	689.067		0	104.532	0	0		0	220.679	0	0		0	121.954	0	0
0	133.89	0	0		0	267.78	0	0		0	110.605	0	0		0	139.712	0	0		0	203.746	0	0		0	87.3197	0	0		0	343.457	0	0		0	104.784	0	0		8.93777	221.21	4.0404	68.3715		0	122.248	0	0
0	134.211	0	0		0	268.423	0	0		0	110.87	0	0		0	140.047	0	0		0	204.234	0	0		0	87.5291	0	0		0	344.281	0	0		0	105.035	0	0		0	221.74	0	0		0	122.541	0	0
0	134.532	0	0		0	269.065	0	0		0	111.135	0	0		0	140.382	0	0		0	204.723	0	0		0	87.7385	0	0		0	345.105	0	0		0	105.286	0	0		0	222.271	0	0		0	122.834	0	0
0	134.853	0	0		0	269.707	0	0		0	111.401	0	0		0	140.717	0	0		0	205.212	0	0		0	87.9479	0	0		0	345.928	0	0		0	105.537	0	0		0	222.801	0	0		0	123.127	0	0
0	135.174	0	0		0	270.349	0	0		0	111.666	0	0		0	141.052	0	0		0	205.7	0	0		0	88.1573	0	0		0	346.752	0	0		0	105.789	0	0		0	223.332	0	0		0	123.42	0	0
1.90169	135.496	1.40351	40.0955		15.1603	270.991	5.59441	165.036		0	111.931	0	0		0	141.387	0	0		0	206.189	0	0		0	88.3667	0	0		0	347.576	0	0		0	106.04	0	0		0	223.862	0	0		0	123.713	0	0
0	135.817	0	0		0	271.633	0	0		0	112.196	0	0		0	141.722	0	0		2.29642	206.678	1.11111	69.6134		0	88.5761	0	0		0	348.399	0	0		0	106.291	0	0		0	224.393	0	0		0	124.007	0	0
0	136.138	0	0		0	272.276	0	0		0	112.462	0	0		0	142.057	0	0		0	207.166	0	0		0	88.7855	0	0		5.37266	349.223	1.53846	220.479		0	106.543	0	0		0	224.923	0	0		0	124.3	0	0
0	136.459	0	0		0	272.918	0	0		0	112.727	0	0		0	142.392	0	0		0	207.655	0	0		0	88.9949	0	0		0	350.046	0	0		0	106.794	0	0		0	225.454	0	0		0	124.593	0	0
0	136.78	0	0		0	273.56	0	0		0	112.992	0	0		4.70528	142.727	3.2967	51.0244		0	208.143	0	0		0	89.2043	0	0		0	350.87	0	0		6.81196	107.045	6.36364	95.2254		0	225.984	0	0		0	124.886	0	0
0	137.101	0	0		0	274.202	0	0		0	113.257	0	0		0	143.062	0	0		0	208.632	0	0		0	89.4137	0	0		0	351.694	0	0		0	107.296	0	0		0	226.515	0	0		0	125.179	0	0
0	137.422	0	0		0	274.844	0	0		0	113.523	0	0		0	143.397	0	0		0	209.12	0	0		0	89.6231	0	0		0	352.517	0	0		0	107.548	0	0		0	227.045	0	0		0	125.472	0	0
0	137.743	0	0		0	275.486	0	0		0	113.788	0	0		0	143.732	0	0		0	209.609	0	0		0	89.8325	0	0		0	353.341	0	0		0	107.799	0	0		0	227.576	0	0		0	125.766	0	0
0	138.064	0	0		0	276.128	0	0		0.814664	114.053	0.714286	24.8536		0	144.067	0	0		0	210.098	0	0		0	90.0419	0	0		0	354.165	0	0		0	108.05	0	0		16.1287	228.106	7.07071	163.13		0	126.059	0	0
0	138.385	0	0		0	276.771	0	0		0	114.318	0	0		0	144.402	0	0		0	210.586	0	0		0	90.2513	0	0		0	354.988	0	0		0	108.302	0	0		0	228.637	0	0		0	126.352	0	0
0	138.706	0	0		0	277.413	0	0		0	114.584	0	0		0	144.737	0	0		0	211.075	0	0		0	90.4607	0	0		0	355.812	0	0		0	108.553	0	0		0	229.167	0	0		0	126.645	0	0
0	139.028	0	0		7.77776	278.055	2.7972	105.377		0	114.849	0	0		0	145.072	0	0		0	211.564	0	0		0	90.6701	0	0		5.4867	356.636	1.53846	248.629		0	108.804	0	0		0	229.697	0	0		0	126.938	0	0
0	139.349	0	0		0	278.697	0	0		0	115.114	0	0		0	145.407	0	0		0	212.052	0	0		0	90.8795	0	0		0	357.459	0	0		0	109.055	0	0		0	230.228	0	0		0	127.231	0	0
0	139.67	0	0		0	279.339	0	0		0	115.379	0	0		0	145.742	0	0		0	212.541	0	0		0	91.0889	0	0		0	358.283	0	0		0	109.307	0	0		0	230.758	0	0		0	127.524	0	0
0	139.991	0	0		0	279.981	0	0		0	115.644	0	0		0	146.077	0	0		0	213.029	0	0		0	91.2983	0	0		0	359.106	0	0		0	109.558	0	0		0	231.289	0	0		0	127.818	0	0
0	140.312	0	0		0	280.623	0	0		0	115.91	0	0		0	146.412	0	0		0	213.518	0	0		0	91.5077	0	0		0	359.93	0	0		0	109.809	0	0		0	231.82	0	0		0	128.111	0	0
0	140.633	0	0		0	281.266	0	0		0	116.175	0	0		0	146.747	0	0		0	214.006	0	0		0	91.7171	0	0		0	360.754	0	0		0	110.061	0	0		0	232.35	0	0		9.36278	128.404	7.29167	99.769
0	140.954	0	0		0	281.908	0	0		0	116.44	0	0		0	147.082	0	0		0	214.495	0	0		0	91.9265	0	0		0	361.577	0	0		0	110.312	0	0		0	232.88	0	0		0	128.697	0	0
0	141.275	0	0		0	282.55	0	0		0	116.705	0	0		0	147.417	0	0		0	214.984	0	0		0	92.1359	0	0		0	362.401	0	0		0	110.563	0	0		0	233.411	0	0		0	128.99	0	0
0	141.596	0	0		0	283.192	0	0		0	116.971	0	0		0	147.752	0	0		0	215.472	0	0		0	92.3453	0	0		0	363.225	0	0		0	110.814	0	0		0	233.941	0	0		0	129.283	0	0
0	141.917	0	0		0	283.834	0	0		0	117.236	0	0		0	148.088	0	0		0	215.961	0	0		0	92.5547	0	0		11.2015	364.048	3.07692	556.94		0	111.066	0	0		0	234.472	0	0		0	129.577	0	0
0	142.238	0	0		0	284.476	0	0		0	117.501	0	0		0	148.423	0	0		0	216.45	0	0		3.09214	92.7641	3.33333	31.1841		0	364.872	0	0		0	111.317	0	0		0	235.002	0	0		0	129.87	0	0
1.50062	142.559	1.05263	38.5452		5.98151	285.119	2.0979	98.2711		0	117.766	0	0		0	148.757	0	0		0	216.938	0	0		0	92.9735	0	0		0	365.696	0	0		0	111.568	0	0		14.2747	235.533	6.06061	186.407		0	130.163	0	0
0	142.88	0	0		0	285.761	0	0		0	118.032	0	0		0	149.093	0	0		0	217.427	0	0		0	93.1829	0	0		0	366.519	0	0		0	111.82	0	0		0	236.063	0	0		0	130.456	0	0
0	143.202	0	0		0	286.403	0	0		0	118.297	0	0		0	149.428	0	0		0	217.915	0	0		0	93.3923	0	0		0	367.343	0	0		0	112.071	0	0		0	236.594	0	0		0	130.749	0	0
0	143.523	0	0		0	287.045	0	0		0	118.562	0	0		4.93723	149.763	3.2967	70.9071		0	218.404	0	0		0	93.6017	0	0		0	368.167	0	0		0	112.322	0	0		0	237.124	0	0		0	131.042	0	0
0	143.844	0	0		0	287.687	0	0		0	118.827	0	0		0	150.098	0	0		0	218.893	0	0		0	93.8111	0	0		0	368.99	0	0		0	112.573	0	0		0	237.655	0	0		0	131.335	0	0
0	144.165	0	0		0	288.329	0	0		0	119.093	0	0		0	150.433	0	0		0	219.381	0	0		0	94.0205	0	0		0	369.814	0	0		0	112.825	0	0		0	238.185	0	0		0	131.629	0	0
0	144.486	0	0		0	288.972	0	0		0	119.358	0	0		0	150.768	0	0		0	219.87	0	0		0	94.2299	0	0		11.4042	370.637	3.07692	612.828		0	113.076	0	0		0	238.716	0	0		0	131.922	0	0
0	144.807	0	0		0	289.614	0	0		0	119.623	0	0		0	151.103	0	0		0	220.358	0	0		0	94.4393	0	0		0	371.461	0	0		0	113.327	0	0		0	239.246	0	0		0	132.215	0	0
0	145.128	0	0		0	290.256	0	0		0	119.888	0	0		0	151.438	0	0		0	220.847	0	0		0	94.6487	0	0		0	372.285	0	0		0	113.578	0	0		0	239.777	0	0		0	132.508	0	0
0	145.449	0	0		0	290.898	0	0		0	120.154	0	0		0	151.773	0	0		0	221.335	0	0		0	94.8581	0	0		0	373.108	0	0		0	113.83	0	0		0	240.307	0	0		0	132.801	0	0
0	145.77	0	0		0	291.54	0	0		0	120.419	0	0		0	152.108	0	0		0	221.824	0	0		0	95.0675	0	0		0	373.932	0	0		8.2968	114.081	7.27273	152.018		0	240.838	0	0		0	133.095	0	0
0	146.091	0	0		16.3459	292.182	5.59441	318.94		0	120.684	0	0		0	152.443	0	0		0	222.313	0	0		0	95.2769	0	0		0	374.756	0	0		0	114.332	0	0		0	241.368	0	0		0	133.388	0	0
0	146.412	0	0		0	292.825	0	0		0	120.949	0	0		0	152.778	0	0		0	222.801	0	0		0	95.4863	0	0		0	375.579	0	0		0	114.584	0	0		0	241.899	0	0		0	133.681	0	0
0	146.733	0	0		0	293.467	0	0		0	121.215	0	0		0	153.113	0	0		0	223.29	0	0		0	95.6957	0	0		0	376.403	0	0		0	114.835	0	0		9.79511	242.429	4.0404	157.099		0	133.974	0	0
0	147.054	0	0		0	294.109	0	0		0	121.48	0	0		0	153.448	0	0		0	223.779	0	0		0	95.9051	0	0		0	377.227	0	0		0	115.086	0	0		0	242.959	0	0		0	134.267	0	0
0	147.375	0	0		0	294.751	0	0		0	121.745	0	0		0	153.783	0	0		0	224.267	0	0		0	96.1145	0	0		17.4485	378.05	4.61538	1018.35		0	115.337	0	0		0	243.49	0	0		0	134.56	0	0
0	147.697	0	0		0	295.393	0	0		0	122.01	0	0		0	154.118	0	0		0	224.756	0	0		0	96.3239	0	0		0	378.874	0	0		0	115.589	0	0		0	244.02	0	0		0	134.853	0	0
0	148.018	0	0		0	296.035	0	0		0	122.275	0	0		0	154.453	0	0		0	225.244	0	0		0	96.5333	0	0		0	379.697	0	0		0	115.84	0	0		0	244.551	0	0		0	135.147	0	0
0	148.339	0	0		0	296.678	0	0		0	122.541	0	0		0	154.788	0	0		0	225.733	0	0		0	96.7427	0	0		0	380.521	0	0		0	116.091	0	0		0	245.082	0	0		1.41083	135.44	1.04167	20.1903
0	148.66	0	0		0	297.32	0	0		0	122.806	0	0		0	155.123	0	0		0	226.221	0	0		0	96.9521	0	0		0	381.345	0	0		0	116.343	0	0		0	245.612	0	0		0	135.733	0	0
0	148.981	0	0		0	297.962	0	0		0	123.071	0	0		0	155.458	0	0		0	226.71	0	0		0	97.1615	0	0		0	382.168	0	0		0	116.594	0	0		0	246.142	0	0		0	136.026	0	0
0	149.302	0	0		0	298.604	0	0		0	123.336	0	0		0	155.793	0	0		0	227.199	0	0		0	97.3709	0	0		0	382.992	0	0		0	116.845	0	0		0	246.673	0	0		0	136.319	0	0
0	149.623	0	0		0	299.246	0	0		0	123.602	0	0		0	156.128	0	0		0	227.687	0	0		0	97.5803	0	0		0	383.816	0	0		0	117.096	0	0		0	247.203	0	0		0	136.612	0	0
1.05224	149.944	0.701754	32.3515		6.29136	299.888	2.0979	145.261		0	123.867	0	0		0	156.464	0	0		0	228.176	0	0		0	97.7897	0	0		0	384.639	0	0		0	117.348	0	0		0	247.734	0	0		0	136.905	0	0
0	150.265	0	0		0	300.531	0	0		0	124.132	0	0		4.30765	156.798	2.74725	78.3778		0	228.665	0	0		0	97.9991	0	0		2.9651	385.463	0.769231	187.087		0	117.599	0	0		0	248.264	0	0		0	137.199	0	0
0	150.586	0	0		0	301.173	0	0		0	124.397	0	0		0	157.133	0	0		0	229.153	0	0		0	98.2085	0	0		0	386.287	0	0		0	117.85	0	0		0	248.795	0	0		0	137.492	0	0
0	150.907	0	0		0	301.815	0	0		0	124.663	0	0		0	157.469	0	0		0	229.642	0	0		0	98.4179	0	0		0	387.11	0	0		0	118.101	0	0		0	249.325	0	0		0	137.785	0	0
0	151.228	0	0		0	302.457	0	0		0	124.928	0	0		0	157.804	0	0		0	230.13	0	0		0	98.6273	0	0		0	387.934	0	0		0	118.353	0	0		0	249.856	0	0		0	138.078	0	0
0	151.55	0	0		0	303.099	0	0		0	125.193	0	0		0	158.139	0	0		0	230.619	0	0		0	98.8367	0	0		0	388.757	0	0		0	118.604	0	0		0	250.386	0	0		0	138.371	0	0
0	151.871	0	0		0	303.741	0	0		0	125.458	0	0		0	158.474	0	0		0	231.107	0	0		0	99.0461	0	0		0	389.581	0	0		0	118.855	0	0		0	250.917	0	0		0	138.665	0	0
0	152.192	0	0		0	304.383	0	0		0	125.724	0	0		0	158.809	0	0		0	231.596	0	0		0	99.2555	0	0		0	390.405	0	0		0	119.107	0	0		0	251.447	0	0		0	138.958	0	0
0	152.513	0	0		0	305.026	0	0		0	125.989	0	0		0	159.144	0	0		0	232.085	0	0		0	99.4649	0	0		0	391.228	0	0		0	119.358	0	0		0	251.978	0	0		0	139.251	0	0
0	152.834	0	0		0	305.668	0	0		0	126.254	0	0		0	159.479	0	0		0	232.573	0	0		0	99.6743	0	0		9.04735	392.052	2.30769	609.689		0	119.609	0	0		0	252.508	0	0		0	139.544	0	0
0	153.155	0	0		0	306.31	0	0		0	126.519	0	0		0	159.814	0	0		0	233.062	0	0		2.49709	99.8837	2.5	35.5434		0	392.876	0	0		0	119.86	0	0		0	253.039	0	0		0	139.837	0	0
0	153.476	0	0		2.14652	306.952	0.699301	56.9901		0	126.784	0	0		0	160.149	0	0		0	233.55	0	0		0	100.093	0	0		0	393.699	0	0		0	120.112	0	0		0	253.569	0	0		0	140.13	0	0
0	153.797	0	0		0	307.594	0	0		0	127.05	0	0		0	160.484	0	0		0	234.039	0	0		0	100.302	0	0		0	394.523	0	0		0	120.363	0	0		0	254.1	0	0		0	140.423	0	0
0	154.118	0	0		0	308.236	0	0		0	127.315	0	0		0	160.819	0	0		0	234.528	0	0		0	100.512	0	0		0	395.347	0	0		0	120.614	0	0		0	254.63	0	0		0	140.717	0	0
0	154.439	0	0		0	308.878	0	0		0	127.58	0	0		0	161.154	0	0		0	235.016	0	0		0	100.721	0	0		0	396.17	0	0		0	120.865	0	0		0	255.161	0	0		0	141.01	0	0
0	154.76	0	0		0	309.521	0	0		0	127.846	0	0		0	161.489	0	0		0	235.505	0	0		0	100.931	0	0		0	396.994	0	0		0	121.117	0	0		0	255.691	0	0		0	141.303	0	0
0	155.081	0	0		0	310.163	0	0		0	128.111	0	0		0	161.824	0	0		0	235.994	0	0		0	101.14	0	0		0	397.818	0	0		3.31004	121.368	2.72727	76.6274		0	256.221	0	0		0	141.596	0	0
0	155.403	0	0		0	310.805	0	0		0	128.376	0	0		0	162.159	0	0		0	236.482	0	0		0	101.35	0	0		0	398.641	0	0		0	121.619	0	0		5.18691	256.752	2.0202	118.779		0	141.889	0	0
0	155.724	0	0		0	311.447	0	0		0	128.641	0	0		0	162.494	0	0		0	236.971	0	0		0	101.559	0	0		3.07281	399.465	0.769231	222.189		0	121.871	0	0		0	257.283	0	0		0	142.182	0	0
0	156.045	0	0		0	312.089	0	0		0	128.906	0	0		0	162.829	0	0		0	237.459	0	0		0	101.768	0	0		0	400.288	0	0		0	122.122	0	0		0	257.813	0	0		0	142.476	0	0
0	156.366	0	0		0	312.731	0	0		0	129.172	0	0		0	163.164	0	0		0	237.948	0	0		0	101.978	0	0		0	401.112	0	0		0	122.373	0	0		0	258.343	0	0		7.43587	142.769	5.20833	137.36
0	156.687	0	0		0	313.374	0	0		0	129.437	0	0		0	163.499	0	0		0	238.436	0	0		0	102.187	0	0		0	401.936	0	0		0	122.624	0	0		0	258.874	0	0		0	143.062	0	0
0.550905	157.008	0.350877	19.7165		0	314.016	0	0		0	129.702	0	0		0	163.834	0	0		0	238.925	0	0		0	102.397	0	0		0	402.759	0	0		0	122.876	0	0		0	259.404	0	0		0	143.355	0	0
0	157.329	0	0		0	314.658	0	0		0	129.967	0	0		2.70609	164.169	1.64835	60.9014		0	239.414	0	0		0	102.606	0	0		0	403.583	0	0		0	123.127	0	0		0	259.935	0	0		0	143.648	0	0
0	157.65	0	0		0	315.3	0	0		0	130.233	0	0		0	164.504	0	0		0	239.902	0	0		0	102.815	0	0		0	404.407	0	0		0	123.378	0	0		0	260.465	0	0		0	143.941	0	0
0	157.971	0	0		0	315.942	0	0		0	130.498	0	0		0	164.839	0	0		0	240.391	0	0		0	103.025	0	0		0	405.23	0	0		0	123.63	0	0		0	260.996	0	0		0	144.234	0	0
0	158.292	0	0		0	316.584	0	0		0	130.763	0	0		0	165.174	0	0		0	240.88	0	0		0	103.234	0	0		0	406.054	0	0		0	123.881	0	0		0	261.526	0	0		0	144.528	0	0
0	158.613	0	0		0	317.227	0	0		0	131.028	0	0		0	165.51	0	0		0	241.368	0	0		0	103.444	0	0		3.12983	406.878	0.769231	241.994		0	124.132	0	0		0	262.057	0	0		0	144.821	0	0
0	158.934	0	0		0	317.869	0	0		0	131.294	0	0		0	165.845	0	0		0	241.857	0	0		0	103.653	0	0		0	407.701	0	0		0	124.383	0	0		0	262.587	0	0		0	145.114	0	0
0	159.256	0	0		0	318.511	0	0		0	131.559	0	0		0	166.18	0	0		0	242.345	0	0		0	103.862	0	0		0	408.525	0	0		0	124.635	0	0		0	263.118	0	0		0	145.407	0	0
0	159.577	0	0		0	319.153	0	0		0	131.824	0	0		0	166.515	0	0		0	242.834	0	0		0	104.072	0	0		0	409.349	0	0		0	124.886	0	0		0	263.648	0	0		0	145.7	0	0
0	159.898	0	0		0	319.795	0	0		0	132.089	0	0		0	166.85	0	0		0	243.322	0	0		0	104.281	0	0		0	410.172	0	0		0	125.137	0	0		0	264.179	0	0		0	145.994	0	0
0	160.219	0	0		0	320.437	0	0		0	132.355	0	0		0	167.185	0	0		0	243.811	0	0		0	104.49	0	0		0	410.996	0	0		0	125.389	0	0		0	264.709	0	0		0	146.287	0	0
0	160.54	0	0		4.49062	321.08	1.3986	152.446		0	132.62	0	0		0	167.52	0	0		0	244.3	0	0		0	104.7	0	0		0	411.819	0	0		0	125.64	0	0		0	265.24	0	0		0	146.58	0	0
0	160.861	0	0		0	321.722	0	0		0	132.885	0	0		0	167.855	0	0		0	244.788	0	0		0	104.909	0	0		0	412.643	0	0		0	125.891	0	0		0	265.77	0	0		0	146.873	0	0
0	161.182	0	0		0	322.364	0	0		0	133.15	0	0		0	168.19	0	0		0	245.277	0	0		0	105.119	0	0		0	413.467	0	0		0	126.142	0	0		0	266.301	0	0		0	147.166	0	0
0	161.503	0	0		0	323.006	0	0		0	133.416	0	0		0	168.525	0	0		0	245.766	0	0		0	105.328	0	0		0	414.29	0	0		0	126.394	0	0		0	266.831	0	0		0	147.459	0	0
0	161.824	0	0		0	323.648	0	0		0	133.681	0	0		0	168.86	0	0		0	246.254	0	0		0	105.537	0	0		0	415.114	0	0		0	126.645	0	0		0	267.362	0	0		0	147.752	0	0
0	162.145	0	0		0	324.29	0	0		0	133.946	0	0		0	169.195	0	0		0	246.743	0	0		0	105.747	0	0		0	415.938	0	0		0	126.896	0	0		0	267.892	0	0		0	148.046	0	0
0	162.466	0	0		0	324.933	0	0		0	134.211	0	0		0	169.53	0	0		0	247.231	0	0		0	105.956	0	0		0	416.761	0	0		0	127.147	0	0		0	268.423	0	0		0	148.339	0	0
0	162.787	0	0		0	325.575	0	0		0	134.476	0	0		0	169.865	0	0		0	247.72	0	0		0	106.166	0	0		0	417.585	0	0		0	127.399	0	0		0	268.953	0	0		0	148.632	0	0
0	163.108	0	0		0	326.217	0	0		0	134.742	0	0		0	170.2	0	0		0	248.208	0	0		0	106.375	0	0		0	418.409	0	0		0	127.65	0	0		0	269.483	0	0		0	148.925	0	0
0	163.429	0	0		0	326.859	0	0		0	135.007	0	0		0	170.535	0	0		0	248.697	0	0		0	106.585	0	0		0	419.232	0	0		0	127.901	0	0		0	270.014	0	0		0	149.218	0	0
0	163.751	0	0		0	327.501	0	0		0	135.272	0	0		0	170.87	0	0		0	249.186	0	0		0	106.794	0	0		0	420.056	0	0		0	128.153	0	0		0	270.544	0	0		0	149.511	0	0
1.15138	164.072	0.701754	47.2149		2.29471	328.143	0.699301	86.8862		0.968125	135.537	0.714286	46.2551		0.940688	171.205	0.549451	25.2721		2.77416	249.674	1.11111	165.784		0.445847	107.003	0.416667	8.37221		6.47507	420.88	1.53846	563.419		1.16731	128.404	0.909091	32.7732		5.47626	271.075	2.0202	167.298		12.4837	149.805	8.33333	284.123
0			0		0			0		0			0		0			0		0			0		0			0		0			0		0			0		0			0		0			0
0			0		0			0		0			0		0			0		0			0		0			0		0			0		0			0		0			0		0			0
0			0		0			0		0			0		0			0		0			0		0			0		0			0		0			0		0			0		0			0
0			0		0			0		0			0		0			0		0			0		0			0		0			0		0			0		0			0		0			0
0			0		0			0		0			0		0			0		0			0		0			0		0			0		0			0		0			0		0			0
0			0		0			0		0			0		0			0		0			0		0			0		0			0		0			0		0			0		0			0
0			0		0			0		0			0		0			0		0			0		0			0		0			0		0			0		0			0		0			0
0			0		0			0		0			0		0			0		0			0		0			0		0			0		0			0		0			0		0			0
0			0		0			0		0			0		0			0		0			0		0			0		0			0		0			0		0			0		0			0
0			0		0			0		0			0		0			0		0			0		0			0		0			0		0			0		0			0		0			0
0			0		0			0		0			0		0			0		0			0		0			0		0			0		0			0		0			0		0			0
0			0		0			0		0			0		0			0		0			0		0			0		0			0		0			0		0			0		0			0
0			0		0			0		0			0		0			0		0			0		0			0		0			0		0			0		0			0		0			0
0			0		0			0		0			0		0			0		0			0		0			0		0			0		0			0		0			0		0			0
0			0		0			0		0			0		0			0		0			0		0			0		0			0		0			0		0			0		0			0
0			0		0			0		0			0		0			0		0			0		0			0		0			0		0			0		0			0		0			0
0			0		0			0		0			0		0			0		0			0		0			0		0			0		0			0		0			0		0			0
0			0		0			0		0			0		0			0		0			0		0			0		0			0		0			0		0			0		0			0
0			0		0			0		0			0		0			0		0			0		0			0		0			0		0			0		0			0		0			0
0			0		0			0		0			0		0			0		0			0		0			0		0			0		0			0		0			0		0			0
0			0		0			0		0			0		0			0		0			0		0			0		0			0		0			0		0			0		0			0
0			0		0			0		0			0		0			0		0			0		0			0		0			0		0			0		0			0		0			0
0			0		0			0		0			0		0			0		0			0		0			0		0			0		0			0		0			0		0			0
0			0		0			0		0			0		0			0		0			0		0			0		0			0		0			0		0			0		0			0
0			0		0			0		0			0		0			0		0			0		0			0		0			0		0			0		0			0		0			0
0			0		0			0		0			0		0			0		0			0		0			0		0			0		0			0		0			0		0			0
0			0		0			0		0			0		0			0		0			0		0			0		0			0		0			0		0			0		0			0
0			0		0			0		0			0		0			0		0			0		0			0		0			0		0			0		0			0		0			0
0			0		0			0		0			0		0			0		0			0		0			0		0			0		0			0		0			0		0			0
0			0		0			0		0			0		0			0		0			0		0			0		0			0		0			0		0			0		0			0
0			0		0			0		0			0		0			0		0			0		0			0		0			0		0			0		0			0		0			0
0			0		0			0		0			0		0			0		0			0		0			0		0			0		0			0		0			0		0			0
0			0		0			0		0			0		0			0		0			0		0			0		0			0		0			0		0			0		0			0
0			0		0			0		0			0		0			0		0			0		0			0		0			0		0			0		0			0		0			0
0			0		0			0		0			0		0			0		0			0		0			0		0			0		0			0		0			0		0			0
0			0		0			0		0			0		0			0		0			0		0			0		0			0		0			0		0			0		0			0
0			0		0			0		0			0		0			0		0			0		0			0		0			0		0			0		0			0		0			0
0			0		0			0		0			0		0			0		0			0		0			0		0			0		0			0		0			0		0			0
0			0		0			0		0			0		0			0		0			0		0			0		0			0		0			0		0			0		0			0
0			0		0			0		0			0		0			0		0			0		0			0		0			0		0			0		0			0		0			0
0			0		0			0		0			0		0			0		0			0		0			0		0			0		0			0		0			0		0			0
0			0		0			0		0			0		0			0		0			0		0			0		0			0		0			0		0			0		0			0
0			0		0			0		0			0		0			0		0			0		0			0		0			0		0			0		0			0		0			0
0			0		0			0		0			0		0			0		0			0		0			0		0			0		0			0		0			0		0			0
0			0		0			0		0			0		0			0		0			0		0			0		0			0		0			0		0			0		0			0
0			0		0			0		0			0		0			0		0			0		0			0		0			0		0			0		0			0		0			0
0			0		0			0		0			0		0			0		0			0		0			0		0			0		0			0		0			0		0			0
0			0		0			0		0			0		0			0		0			0		0			0		0			0		0			0		0			0		0			0
0			0		0			0		0			0		0			0		0			0		0			0		0			0		0			0		0			0		0			0
0			0		0			0		0			0		0			0		0			0		0			0		0			0		0			0		0			0		0			0
0			0		0			0		0			0		0			0		0			0		0			0		0			0		0			0		0			0		0			0
0			0		0			0		0			0		0			0		0			0		0			0		0			0		0			0		0			0		0			0
0			0		0			0		0			0		0			0		0			0		0			0		0			0		0			0		0			0		0			0
0			0		0			0		0			0		0			0		0			0		0			0		0			0		0			0		0			0		0			0
0			0		0			0		0			0		0			0		0			0		0			0		0			0		0			0		0			0		0			0
0			0		0			0		0			0		0			0		0			0		0			0		0			0		0			0		0			0		0			0
0			0		0			0		0			0		0			0		0			0		0			0		0			0		0			0		0			0		0			0
0			0		0			0		0			0		0			0		0			0		0			0		0			0		0			0		0			0		0			0
0			0		0			0		0			0		0			0		0			0		0			0		0			0		0			0		0			0		0			0
0			0		0			0		0			0		0			0		0			0		0			0		0			0		0			0		0			0		0			0
0			0		0			0		0			0		0			0		0			0		0			0		0			0		0			0		0			0		0			0
0			0		0			0		0			0		0			0		0			0		0			0		0			0		0			0		0			0		0			0
0			0		0			0		0			0		0			0		0			0		0			0		0			0		0			0		0			0		0			0
0			0		0			0		0			0		0			0		0			0		0			0		0			0		0			0		0			0		0			0
0			0		0			0		0			0		0			0		0			0		0			0		0			0		0			0		0			0		0			0
0			0		0			0		0			0		0			0		0			0		0			0		0			0		0			0		0			0		0			0
0			0		0			0		0			0		0			0		0			0		0			0		0			0		0			0		0			0		0			0
0			0		0			0		0			0		0			0		0			0		0			0		0			0		0			0		0			0		0			0
0			0		0			0		0			0		0			0		0			0		0			0		0			0		0			0		0			0		0			0
0			0		0			0		0			0		0			0		0			0		0			0		0			0		0			0		0			0		0			0
0			0		0			0		0			0		0			0		0			0		0			0		0			0		0			0		0			0		0			0
0			0		0			0		0			0		0			0		0			0		0			0		0			0		0			0		0			0		0			0
0			0		0			0		0			0		0			0		0			0		0			0		0			0		0			0		0			0		0			0
0			0		0			0		0			0		0			0		0			0		0			0		0			0		0			0		0			0		0			0
0			0		0			0		0			0		0			0		0			0		0			0		0			0		0			0		0			0		0			0
0			0		0			0		0			0		0			0		0			0		0			0		0			0		0			0		0			0		0			0
0			0		0			0		0			0		0			0		0			0		0			0		0			0		0			0		0			0		0			0
0			0		0			0		0			0		0			0		0			0		0			0		0			0		0			0		0			0		0			0
0			0		0			0		0			0		0			0		0			0		0			0		0			0		0			0		0			0		0			0
0			0		0			0		0			0		0			0		0			0		0			0		0			0		0			0		0			0		0			0
0			0		0			0		0			0		0			0		0			0		0			0		0			0		0			0		0			0		0			0
0			0		0			0		0			0		0			0		0			0		0			0		0			0		0			0		0			0		0			0
0			0		0			0		0			0		0			0		0			0		0			0		0			0		0			0		0			0		0			0
0			0		0			0		0			0		0			0		0			0		0			0		0			0		0			0		0			0		0			0
0			0		0			0		0			0		0			0		0			0		0			0		0			0		0			0		0			0		0			0
0			0		0			0		0			0		0			0		0			0		0			0		0			0		0			0		0			0		0			0
0			0		0			0		0			0		0			0		0			0		0			0		0			0		0			0		0			0		0			0
0			0		0			0		0			0		0			0		0			0		0			0		0			0		0			0		0			0		0			0
0			0		0			0		0			0		0			0		0			0		0			0		0			0		0			0		0			0		0			0
0			0		0			0		0			0		0			0		0			0		0			0		0			0		0			0		0			0		0			0
0			0		0			0		0			0		0			0		0			0		0			0		0			0		0			0		0			0		0			0
0			0		0			0		0			0		0			0		0			0		0			0		0			0		0			0		0			0		0			0
0			0		0			0		0			0		0			0		0			0		0			0		0			0		0			0		0			0		0			0
0			0		0			0		0			0		0			0		0			0		0			0		0			0		0			0		0			0		0			0
0			0		0			0		0			0		0			0		0			0		0			0		0			0		0			0		0			0		0			0
0			0		0			0		0			0		0			0		0			0		0			0		0			0		0			0		0			0		0			0
0			0		0			0		0			0		0			0		0			0		0			0		0			0		0			0		0			0		0			0
0			0		0			0		0			0		0			0		0			0		0			0		0			0		0			0		0			0		0			0
0			0		0			0		0			0		0			0		0			0		0			0		0			0		0			0		0			0		0			0
0			0		0			0		0			0		0			0		0			0		0			0		0			0		0			0		0			0		0			0
0			0		0			0		0			0		0			0		0			0		0			0		0			0		0			0		0			0		0			0
0			0		0			0		0			0		0			0		0			0		0			0		0			0		0			0		0			0		0			0
0			0		0			0		0			0		0			0		0			0		0			0		0			0		0			0		0			0		0			0
0			0		0			0		0			0		0			0		0			0		0			0		0			0		0			0		0			0		0			0
0			0		0			0		0			0		0			0		0			0		0			0		0			0		0			0		0			0		0			0
0			0		0			0		0			0		0			0		0			0		0			0		0			0		0			0		0			0		0			0
0			0		0			0		0			0		0			0		0			0		0			0		0			0		0			0		0			0		0			0
0			0		0			0		0			0		0			0		0			0		0			0		0			0		0			0		0			0		0			0
0			0		0			0		0			0		0			0		0			0		0			0		0			0		0			0		0			0		0			0
0			0		0			0		0			0		0			0		0			0		0			0		0			0		0			0		0			0		0			0
0			0		0			0		0			0		0			0		0			0		0			0		0			0		0			0		0			0		0			0
0			0		0			0		0			0		0			0		0			0		0			0		0			0		0			0		0			0		0			0
0			0		0			0		0			0		0			0		0			0		0			0		0			0		0			0		0			0		0			0
0			0		0			0		0			0		0			0		0			0		0			0		0			0		0			0		0			0		0			0
0			0		0			0		0			0		0			0		0			0		0			0		0			0		0			0		0			0		0			0
0			0		0			0		0			0		0			0		0			0		0			0		0			0		0			0		0			0		0			0
0			0		0			0		0			0		0			0		0			0		0			0		0			0		0			0		0			0		0			0
0			0		0			0		0			0		0			0		0			0		0			0		0			0		0			0		0			0		0			0
0			0		0			0		0			0		0			0		0			0		0			0		0			0		0			0		0			0		0			0
0			0		0			0		0			0		0			0		0			0		0			0		0			0		0			0		0			0		0			0
0			0		0			0		0			0		0			0		0			0		0			0		0			0		0			0		0			0		0			0
0			0		0			0		0			0		0			0		0			0		0			0		0			0		0			0		0			0		0			0
0			0		0			0		0			0		0			0		0			0		0			0		0			0		0			0		0			0		0			0
0			0		0			0		0			0		0			0		0			0		0			0		0			0		0			0		0			0		0			0
0			0		0			0		0			0		0			0		0			0		0			0		0			0		0			0		0			0		0			0
0			0		0			0		0			0		0			0		0			0		0			0		0			0		0			0		0			0		0			0
0			0		0			0		0			0		0			0		0			0		0			0		0			0		0			0		0			0		0			0
0			0		0			0		0			0		0			0		0			0		0			0		0			0		0			0		0			0		0			0
0			0		0			0		0			0		0			0		0			0		0			0		0			0		0			0		0			0		0			0
0			0		0			0		0			0		0			0		0			0		0			0		0			0		0			0		0			0		0			0
0			0		0			0		0			0		0			0		0			0		0			0		0			0		0			0		0			0		0			0
0			0		0			0		0			0		0			0		0			0		0			0		0			0		0			0		0			0		0			0
0			0		0			0		0			0		0			0		0			0		0			0		0			0		0			0		0			0		0			0
0			0		0			0		0			0		0			0		0			0		0			0		0			0		0			0		0			0		0			0
0			0		0			0		0			0		0			0		0			0		0			0		0			0		0			0		0			0		0			0
0			0		0			0		0			0		0			0		0			0		0			0		0			0		0			0		0			0		0			0
0			0		0			0		0			0		0			0		0			0		0			0		0			0		0			0		0			0		0			0
0			0		0			0		0			0		0			0		0			0		0			0		0			0		0			0		0			0		0			0
0			0		0			0		0			0		0			0		0			0		0			0		0			0		0			0		0			0		0			0
0			0		0			0		0			0		0			0		0			0		0			0		0			0		0			0		0			0		0			0
0			0		0			0		0			0		0			0		0			0		0			0		0			0		0			0		0			0		0			0
0			0		0			0		0			0		0			0		0			0		0			0		0			0		0			0		0			0		0			0
0			0		0			0		0			0		0			0		0			0		0			0		0			0		0			0		0			0		0			0
0			0		0			0		0			0		0			0		0			0		0			0		0			0		0			0		0			0		0			0
0			0		0			0		0			0		0			0		0			0		0			0		0			0		0			0		0			0		0			0
0			0		0			0		0			0		0			0		0			0		0			0		0			0		0			0		0			0		0			0
0			0		0			0		0			0		0			0		0			0		0			0		0			0		0			0		0			0		0			0
0			0		0			0		0			0		0			0		0			0		0			0		0			0		0			0		0			0		0			0
0			0		0			0		0			0		0			0		0			0		0			0		0			0		0			0		0			0		0			0
0			0		0			0		0			0		0			0		0			0		0			0		0			0		0			0		0			0		0			0
0			0		0			0		0			0		0			0		0			0		0			0		0			0		0			0		0			0		0			0
0			0		0			0		0			0		0			0		0			0		0			0		0			0		0			0		0			0		0			0
0			0		0			0		0			0		0			0		0			0		0			0		0			0		0			0		0			0		0			0
0			0		0			0		0			0		0			0		0			0		0			0		0			0		0			0		0			0		0			0
0			0		0			0		0			0		0			0		0			0		0			0		0			0		0			0		0			0		0			0
0			0		0			0		0			0		0			0		0			0		0			0		0			0		0			0		0			0		0			0
0			0		0			0		0			0		0			0		0			0		0			0		0			0		0			0		0			0		0			0
0			0		0			0		0			0		0			0		0			0		0			0		0			0		0			0		0			0		0			0
0			0		0			0		0			0		0			0		0			0		0			0		0			0		0			0		0			0		0			0
0			0		0			0		0			0		0			0		0			0		0			0		0			0		0			0		0			0		0			0
0			0		0			0		0			0		0			0		0			0		0			0		0			0		0			0		0			0		0			0
0			0		0			0		0			0		0			0		0			0		0			0		0			0		0			0		0			0		0			0
0			0		0			0		0			0		0			0		0			0		0			0		0			0		0			0		0			0		0			0
0			0		0			0		0			0		0			0		0			0		0			0		0			0		0			0		0			0		0			0
0			0		0			0		0			0		0			0		0			0		0			0		0			0		0			0		0			0		0			0
0			0		0			0		0			0		0			0		0			0		0			0		0			0		0			0		0			0		0			0
0			0		0			0		0			0		0			0		0			0		0			0		0			0		0			0		0			0		0			0
0			0		0			0		0			0		0			0		0			0		0			0		0			0		0			0		0			0		0			0
0			0		0			0		0			0		0			0		0			0		0			0		0			0		0			0		0			0		0			0
0			0		0			0		0			0		0			0		0			0		0			0		0			0		0			0		0			0		0			0
0			0		0			0		0			0		0			0		0			0		0			0		0			0		0			0		0			0		0			0
0			0		0			0		0			0		0			0		0			0		0			0		0			0		0			0		0			0		0			0
0			0		0			0		0			0		0			0		0			0		0			0		0			0		0			0		0			0		0			0
0			0		0			0		0			0		0			0		0			0		0			0		0			0		0			0		0			0		0			0
0			0		0			0		0			0		0			0		0			0		0			0		0			0		0			0		0			0		0			0
0			0		0			0		0			0		0			0		0			0		0			0		0			0		0			0		0			0		0			0
0			0		0			0		0			0		0			0		0			0		0			0		0			0		0			0		0			0		0			0
0			0		0			0		0			0		0			0		0			0		0			0		0			0		0			0		0			0		0			0
0			0		0			0		0			0		0			0		0			0		0			0		0			0		0			0		0			0		0			0
0			0		0			0		0			0		0			0		0			0		0			0		0			0		0			0		0			0		0			0
0			0		0			0		0			0		0			0		0			0		0			0		0			0		0			0		0			0		0			0
0			0		0			0		0			0		0			0		0			0		0			0		0			0		0			0		0			0		0			0
0			0		0			0		0			0		0			0		0			0		0			0		0			0		0			0		0			0		0			0
0			0		0			0		0			0		0			0		0			0		0			0		0			0		0			0		0			0		0			0
0			0		0			0		0			0		0			0		0			0		0			0		0			0		0			0		0			0		0			0
0			0		0			0		0			0		0			0		0			0		0			0		0			0		0			0		0			0		0			0
0			0		0			0		0			0		0			0		0			0		0			0		0			0		0			0		0			0		0			0
0			0		0			0		0			0		0			0		0			0		0			0		0			0		0			0		0			0		0			0
0			0		0			0		0			0		0			0		0			0		0			0		0			0		0			0		0			0		0			0
0			0		0			0		0			0		0			0		0			0		0			0		0			0		0			0		0			0		0			0
0			0		0			0		0			0		0			0		0			0		0			0		0			0		0			0		0			0		0			0
0			0		0			0		0			0		0			0		0			0		0			0		0			0		0			0		0			0		0			0
0			0		0			0		0			0		0			0		0			0		0			0		0			0		0			0		0			0		0			0
0			0		0			0		0			0		0			0		0			0		0			0		0			0		0			0		0			0		0			0
0			0		0			0		0			0		0			0		0			0		0			0		0			0		0			0		0			0		0			0
0			0		0			0		0			0		0			0		0			0		0			0		0			0		0			0		0			0		0			0
0			0		0			0		0			0		0			0		0			0		0			0		0			0		0			0		0			0		0			0
0			0		0			0		0			0		0			0		0			0		0			0		0			0		0			0		0			0		0			0
0			0		0			0		0			0		0			0		0			0		0			0		0			0		0			0		0			0		0			0
0			0		0			0		0			0		0			0		0			0		0			0		0			0		0			0		0			0		0			0
0			0		0			0		0			0		0			0		0			0		0			0		0			0		0			0		0			0		0			0
0			0		0			0		0			0		0			0		0			0		0			0		0			0		0			0		0			0		0			0
0			0		0			0		0			0		0			0		0			0		0			0		0			0		0			0		0			0		0			0
0			0		0			0		0			0		0			0		0			0		0			0		0			0		0			0		0			0		0			0
0			0		0			0		0			0		0			0		0			0		0			0		0			0		0			0		0			0		0			0
0			0		0			0		0			0		0			0		0			0		0			0		0			0		0			0		0			0		0			0
0			0		0			0		0			0		0			0		0			0		0			0		0			0		0			0		0			0		0			0
0			0		0			0		0			0		0			0		0			0		0			0		0			0		0			0		0			0		0			0
0			0		0			0		0			0		0			0		0			0		0			0		0			0		0			0		0			0		0			0
0			0		0			0		0			0		0			0		0			0		0			0		0			0		0			0		0			0		0			0
0			0		0			0		0			0		0			0		0			0		0			0		0			0		0			0		0			0		0			0
0			0		0			0		0			0		0			0		0			0		0			0		0			0		0			0		0			0		0			0
0			0		0			0		0			0		0			0		0			0		0			0		0			0		0			0		0			0		0			0
0			0		0			0		0			0		0			0		0			0		0			0		0			0		0			0		0			0		0			0
0			0		0			0		0			0		0			0		0			0		0			0		0			0		0			0		0			0		0			0
0			0		0			0		0			0		0			0		0			0		0			0		0			0		0			0		0			0		0			0
0			0		0			0		0			0		0			0		0			0		0			0		0			0		0			0		0			0		0			0
0			0		0			0		0			0		0			0		0			0		0			0		0			0		0			0		0			0		0			0
0			0		0			0		0			0		0			0		0			0		0			0		0			0		0			0		0			0		0			0
0			0		0			0		0			0		0			0		0			0		0			0		0			0		0			0		0			0		0			0
0			0		0			0		0			0		0			0		0			0		0			0		0			0		0			0		0			0		0			0
0			0		0			0		0			0		0			0		0			0		0			0		0			0		0			0		0			0		0			0
0			0		0			0		0			0		0			0		0			0		0			0		0			0		0			0		0			0		0			0
0			0		0			0		0			0		0			0		0			0		0			0		0			0		0			0		0			0		0			0
0			0		0			0		0			0		0			0		0			0		0			0		0			0		0			0		0			0		0			0
0			0		0			0		0			0		0			0		0			0		0			0		0			0		0			0		0			0		0			0
0			0		0			0		0			0		0			0		0			0		0			0		0			0		0			0		0			0		0			0
0			0		0			0		0			0		0			0		0			0		0			0		0			0		0			0		0			0		0			0
0			0		0			0		0			0		0			0		0			0		0			0		0			0		0			0		0			0		0			0
0			0		0			0		0			0		0			0		0			0		0			0		0			0		0			0		0			0		0			0
0			0		0			0		0			0		0			0		0			0		0			0		0			0		0			0		0			0		0			0
0			0		0			0		0			0		0			0		0			0		0			0		0			0		0			0		0			0		0			0
0			0		0			0		0			0		0			0		0			0		0			0		0			0		0			0		0			0		0			0
0			0		0			0		0			0		0			0		0			0		0			0		0			0		0			0		0			0		0			0
0			0		0			0		0			0		0			0		0			0		0			0		0			0		0			0		0			0		0			0
0			0		0			0		0			0		0			0		0			0		0			0		0			0		0			0		0			0		0			0
0			0		0			0		0			0		0			0		0			0		0			0		0			0		0			0		0			0		0			0
0			0		0			0		0			0		0			0		0			0		0			0		0			0		0			0		0			0		0			0
0			0		0			0		0			0		0			0		0			0		0			0		0			0		0			0		0			0		0			0
0			0		0			0		0			0		0			0		0			0		0			0		0			0		0			0		0			0		0			0
0			0		0			0		0			0		0			0		0			0		0			0		0			0		0			0		0			0		0			0
0			0		0			0		0			0		0			0		0			0		0			0		0			0		0			0		0			0		0			0
0			0		0			0		0			0		0			0		0			0		0			0		0			0		0			0		0			0		0			0
0			0		0			0		0			0		0			0		0			0		0			0		0			0		0			0		0			0		0			0
0			0		0			0		0			0		0			0		0			0		0			0		0			0		0			0		0			0		0			0
0			0		0			0		0			0		0			0		0			0		0			0		0			0		0			0		0			0		0			0
0			0		0			0		0			0		0			0		0			0		0			0		0			0		0			0		0			0		0			0
0			0		0			0		0			0		0			0		0			0		0			0		0			0		0			0		0			0		0			0
0			0		0			0		0			0		0			0		0			0		0			0		0			0		0			0		0			0		0			0
0			0		0			0		0			0		0			0		0			0		0			0		0			0		0			0		0			0		0			0
0			0		0			0		0			0		0			0		0			0		0			0		0			0		0			0		0			0		0			0
0			0		0			0		0			0		0			0		0			0		0			0		0			0		0			0		0			0		0			0
0			0		0			0		0			0		0			0		0			0		0			0		0			0		0			0		0			0		0			0
0			0		0			0		0			0		0			0		0			0		0			0		0			0		0			0		0			0		0			0
0			0		0			0		0			0		0			0		0			0		0			0		0			0		0			0		0			0		0			0
0			0		0			0		0			0		0			0		0			0		0			0		0			0		0			0		0			0		0			0
0			0		0			0		0			0		0			0		0			0		0			0		0			0		0			0		0			0		0			0
0			0		0			0		0			0		0			0		0			0		0			0		0			0		0			0		0			0		0			0
0			0		0			0		0			0		0			0		0			0		0			0		0			0		0			0		0			0		0			0
0			0		0			0		0			0		0			0		0			0		0			0		0			0		0			0		0			0		0			0
0			0		0			0		0			0		0			0		0			0		0			0		0			0		0			0		0			0		0			0
0			0		0			0		0			0		0			0		0			0		0			0		0			0		0			0		0			0		0			0
0			0		0			0		0			0		0			0		0			0		0			0		0			0		0			0		0			0		0			0
0			0		0			0		0			0		0			0		0			0		0			0		0			0		0			0		0			0		0			0
0			0		0			0		0			0		0			0		0			0		0			0		0			0		0			0		0			0		0			0
0			0		0			0		0			0		0			0		0			0		0			0		0			0		0			0		0			0		0			0
0			0		0			0		0			0		0			0		0			0		0			0		0			0		0			0		0			0		0			0
0			0		0			0		0			0		0			0		0			0		0			0		0			0		0			0		0			0		0			0
0			0		0			0		0			0		0			0		0			0		0			0		0			0		0			0		0			0		0			0
0			0		0			0		0			0		0			0		0			0		0			0		0			0		0			0		0			0		0			0
0			0		0			0		0			0		0			0		0			0		0			0		0			0		0			0		0			0		0			0
0			0		0			0		0			0		0			0		0			0		0			0		0			0		0			0		0			0		0			0
0			0		0			0		0			0		0			0		0			0		0			0		0			0		0			0		0			0		0			0
0			0		0			0		0			0		0			0		0			0		0			0		0			0		0			0		0			0		0			0
0			0		0			0		0			0		0			0		0			0		0			0		0			0		0			0		0			0		0			0
0			0		0			0		0			0		0			0		0			0		0			0		0			0		0			0		0			0		0			0
0			0		0			0		0			0		0			0		0			0		0			0		0			0		0			0		0			0		0			0
0			0		0			0		0			0		0			0		0			0		0			0		0			0		0			0		0			0		0			0
0			0		0			0		0			0		0			0		0			0		0			0		0			0		0			0		0			0		0			0
0			0		0			0		0			0		0			0		0			0		0			0		0			0		0			0		0			0		0			0
0			0		0			0		0			0		0			0		0			0		0			0		0			0		0			0		0			0		0			0
0			0		0			0		0			0		0			0		0			0		0			0		0			0		0			0		0			0		0			0
0			0		0			0		0			0		0			0		0			0		0			0		0			0		0			0		0			0		0			0
0			0		0			0		0			0		0			0		0			0		0			0		0			0		0			0		0			0		0			0
0			0		0			0		0			0		0			0		0			0		0			0		0			0		0			0		0			0		0			0
0			0		0			0		0			0		0			0		0			0		0			0		0			0		0			0		0			0		0			0
0			0		0			0		0			0		0			0		0			0		0			0		0			0		0			0		0			0		0			0
0			0		0			0		0			0		0			0		0			0		0			0		0			0		0			0		0			0		0			0
0			0		0			0		0			0		0			0		0			0		0			0		0			0		0			0		0			0		0			0
0			0		0			0		0			0		0			0		0			0		0			0		0			0		0			0		0			0		0			0
0			0		0			0		0			0		0			0		0			0		0			0		0			0		0			0		0			0		0			0
0			0		0			0		0			0		0			0		0			0		0			0		0			0		0			0		0			0		0			0
0			0		0			0		0			0		0			0		0			0		0			0		0			0		0			0		0			0		0			0
0			0		0			0		0			0		0			0		0			0		0			0		0			0		0			0		0			0		0			0
0			0		0			0		0			0		0			0		0			0		0			0		0			0		0			0		0			0		0			0
0			0		0			0		0			0		0			0		0			0		0			0		0			0		0			0		0			0		0			0
0			0		0			0		0			0		0			0		0			0		0			0		0			0		0			0		0			0		0			0
0			0		0			0		0			0		0			0		0			0		0			0		0			0		0			0		0			0		0			0
0			0		0			0		0			0		0			0		0			0		0			0		0			0		0			0		0			0		0			0
0			0		0			0		0			0		0			0		0			0		0			0		0			0		0			0		0			0		0			0
0			0		0			0		0			0		0			0		0			0		0			0		0			0		0			0		0			0		0			0
0			0		0			0		0			0		0			0		0			0		0			0		0			0		0			0		0			0		0			0
0			0		0			0		0			0		0			0		0			0		0			0		0			0		0			0		0			0		0			0
0			0		0			0		0			0		0			0		0			0		0			0		0			0		0			0		0			0		0			0
0			0		0			0		0			0		0			0		0			0		0			0		0			0		0			0		0			0		0			0
0			0		0			0		0			0		0			0		0			0		0			0		0			0		0			0		0			0		0			0
0			0		0			0		0			0		0			0		0			0		0			0		0			0		0			0		0			0		0			0
0			0		0			0		0			0		0			0		0			0		0			0		0			0		0			0		0			0		0			0
0			0		0			0		0			0		0			0		0			0		0			0		0			0		0			0		0			0		0			0
0			0		0			0		0			0		0			0		0			0		0			0		0			0		0			0		0			0		0			0
0			0		0			0		0			0		0			0		0			0		0			0		0			0		0			0		0			0		0			0
0			0		0			0		0			0		0			0		0			0		0			0		0			0		0			0		0			0		0			0
0			0		0			0		0			0		0			0		0			0		0			0		0			0		0			0		0			0		0			0
0			0		0			0		0			0		0			0		0			0		0			0		0			0		0			0		0			0		0			0
0			0		0			0		0			0		0			0		0			0		0			0		0			0		0			0		0			0		0			0
0			0		0			0		0			0		0			0		0			0		0			0		0			0		0			0		0			0		0			0
0			0		0			0		0			0		0			0		0			0		0			0		0			0		0			0		0			0		0			0
0			0		0			0		0			0		0			0		0			0		0			0		0			0		0			0		0			0		0			0
0			0		0			0		0			0		0			0		0			0		0			0		0			0		0			0		0			0		0			0
0			0		0			0		0			0		0			0		0			0		0			0		0			0		0			0		0			0		0			0
0			0		0			0		0			0		0			0		0			0		0			0		0			0		0			0		0			0		0			0
0			0		0			0		0			0		0			0		0			0		0			0		0			0		0			0		0			0		0			0
0			0		0			0		0			0		0			0		0			0		0			0		0			0		0			0		0			0		0			0
0			0		0			0		0			0		0			0		0			0		0			0		0			0		0			0		0			0		0			0
0			0		0			0		0			0		0			0		0			0		0			0		0			0		0			0		0			0		0			0
0			0		0			0		0			0		0			0		0			0		0			0		0			0		0			0		0			0		0			0
0			0		0			0		0			0		0			0		0			0		0			0		0			0		0			0		0			0		0			0
0			0		0			0		0			0		0			0		0			0		0			0		0			0		0			0		0			0		0			0
0			0		0			0		0			0		0			0		0			0		0			0		0			0		0			0		0			0		0			0
0			0		0			0		0			0		0			0		0			0		0			0		0			0		0			0		0			0		0			0
0			0		0			0		0			0		0			0		0			0		0			0		0			0		0			0		0			0		0			0
0			0		0			0		0			0		0			0		0			0		0			0		0			0		0			0		0			0		0			0
0			0		0			0		0			0		0			0		0			0		0			0		0			0		0			0		0			0		0			0
0			0		0			0		0			0		0			0		0			0		0			0		0			0		0			0		0			0		0			0
0			0		0			0		0			0		0			0		0			0		0			0		0			0		0			0		0			0		0			0
0			0		0			0		0			0		0			0		0			0		0			0		0			0		0			0		0			0		0			0
0			0		0			0		0			0		0			0		0			0		0			0		0			0		0			0		0			0		0			0
0			0		0			0		0			0		0			0		0			0		0			0		0			0		0			0		0			0		0			0
0			0		0			0		0			0		0			0		0			0		0			0		0			0		0			0		0			0		0			0
0			0		0			0		0			0		0			0		0			0		0			0		0			0		0			0		0			0		0			0
0			0		0			0		0			0		0			0		0			0		0			0		0			0		0			0		0			0		0			0
0			0		0			0		0			0		0			0		0			0		0			0		0			0		0			0		0			0		0			0
0			0		0			0		0			0		0			0		0			0		0			0		0			0		0			0		0			0		0			0
0			0		0			0		0			0		0			0		0			0		0			0		0			0		0			0		0			0		0			0
0			0		0			0		0			0		0			0		0			0		0			0		0			0		0			0		0			0		0			0
0			0		0			0		0			0		0			0		0			0		0			0		0			0		0			0		0			0		0			0
0			0		0			0		0			0		0			0		0			0		0			0		0			0		0			0		0			0		0			0
0			0		0			0		0			0		0			0		0			0		0			0		0			0		0			0		0			0		0			0
0			0		0			0		0			0		0			0		0			0		0			0		0			0		0			0		0			0		0			0
0			0		0			0		0			0		0			0		0			0		0			0		0			0		0			0		0			0		0			0
0			0		0			0		0			0		0			0		0			0		0			0		0			0		0			0		0			0		0			0
0			0		0			0		0			0		0			0		0			0		0			0		0			0		0			0		0			0		0			0
0			0		0			0		0			0		0			0		0			0		0			0		0			0		0			0		0			0		0			0
0			0		0			0		0			0		0			0		0			0		0			0		0			0		0			0		0			0		0			0
0			0		0			0		0			0		0			0		0			0		0			0		0			0		0			0		0			0		0			0
0			0		0			0		0			0		0			0		0			0		0			0		0			0		0			0		0			0		0			0
0			0		0			0		0			0		0			0		0			0		0			0		0			0		0			0		0			0		0			0
0			0		0			0		0			0		0			0		0			0		0			0		0			0		0			0		0			0		0			0
0			0		0			0		0			0		0			0		0			0		0			0		0			0		0			0		0			0		0			0
0			0		0			0		0			0		0			0		0			0		0			0		0			0		0			0		0			0		0			0
0			0		0			0		0			0		0			0		0			0		0			0		0			0		0			0		0			0		0			0
0			0		0			0		0			0		0			0		0			0		0			0		0			0		0			0		0			0		0			0
0			0		0			0		0			0		0			0		0			0		0			0		0			0		0			0		0			0		0			0
0			0		0			0		0			0		0			0		0			0		0			0		0			0		0			0		0			0		0			0
0			0		0			0		0			0		0			0		0			0		0			0		0			0		0			0		0			0		0			0
0			0		0			0		0			0		0			0		0			0		0			0		0			0		0			0		0			0		0			0
0			0		0			0		0			0		0			0		0			0		0			0		0			0		0			0		0			0		0			0
0			0		0			0		0			0		0			0		0			0		0			0		0			0		0			0		0			0		0			0
0			0		0			0		0			0		0			0		0			0		0			0		0			0		0			0		0			0		0			0
0			0		0			0		0			0		0			0		0			0		0			0		0			0		0			0		0			0		0			0
0			0		0			0		0			0		0			0		0			0		0			0		0			0		0			0		0			0		0			0
0			0		0			0		0			0		0			0		0			0		0			0		0			0		0			0		0			0		0			0
0			0		0			0		0			0		0			0		0			0		0			0		0			0		0			0		0			0		0			0
0			0		0			0		0			0		0			0		0			0		0			0		0			0		0			0		0			0		0			0
0			0		0			0		0			0		0			0		0			0		0			0		0			0		0			0		0			0		0			0
0			0		0			0		0			0		0			0		0			0		0			0		0			0		0			0		0			0		0			0
0			0		0			0		0			0		0			0		0			0		0			0		0			0		0			0		0			0		0			0
0			0		0			0		0			0		0			0		0			0		0			0		0			0		0			0		0			0		0			0
0			0		0			0		0			0		0			0		0			0		0			0		0			0		0			0		0			0		0			0
0			0		0			0		0			0		0			0		0			0		0			0		0			0		0			0		0			0		0			0
0			0		0			0		0			0		0			0		0			0		0			0		0			0		0			0		0			0		0			0
0			0		0			0		0			0		0			0		0			0		0			0		0			0		0			0		0			0		0			0
0			0		0			0		0			0		0			0		0			0		0			0		0			0		0			0		0			0		0			0
0			0		0			0		0			0		0			0		0			0		0			0		0			0		0			0		0			0		0			0
0			0		0			0		0			0		0			0		0			0		0			0		0			0		0			0		0			0		0			0
0			0		0			0		0			0		0			0		0			0		0			0		0			0		0			0		0			0		0			0
0			0		0			0		0			0		0			0		0			0		0			0		0			0		0			0		0			0		0			0
0			0		0			0		0			0		0			0		0			0		0			0		0			0		0			0		0			0		0			0
0			0		0			0		0			0		0			0		0			0		0			0		0			0		0			0		0			0		0			0
0			0		0			0		0			0		0			0		0			0		0			0		0			0		0			0		0			0		0			0
0			0		0			0		0			0		0			0		0			0		0			0		0			0		0			0		0			0		0			0
0			0		0			0		0			0		0			0		0			0		0			0		0			0		0			0		0			0		0			0
0			0		0			0		0			0		0			0		0			0		0			0		0			0		0			0		0			0		0			0
0			0		0			0		0			0		0			0		0			0		0			0		0			0		0			0		0			0		0			0
0			0		0			0		0			0		0			0		0			0		0			0		0			0		0			0		0			0		0			0
0			0		0			0		0			0		0			0		0			0		0			0		0			0		0			0		0			0		0			0
0			0		0			0		0			0		0			0		0			0		0			0		0			0		0			0		0			0		0			0
0			0		0			0		0			0		0			0		0			0		0			0		0			0		0			0		0			0		0			0
0			0		0			0		0			0		0			0		0			0		0			0		0			0		0			0		0			0		0			0
0			0		0			0		0			0		0			0		0			0		0			0		0			0		0			0		0			0		0			0
0			0		0			0		0			0		0			0		0			0		0			0		0			0		0			0		0			0		0			0
0			0		0			0		0			0		0			0		0			0		0			0		0			0		0			0		0			0		0			0
0			0		0			0		0			0		0			0		0			0		0			0		0			0		0			0		0			0		0			0
0			0		0			0		0			0		0			0		0			0		0			0		0			0		0			0		0			0		0			0
0			0		0			0		0			0		0			0		0			0		0			0		0			0		0			0		0			0		0			0
0			0		0			0		0			0		0			0		0			0		0			0		0			0		0			0		0			0		0			0
0			0		0			0		0			0		0			0		0			0		0			0		0			0		0			0		0			0		0			0
0			0		0			0		0			0		0			0		0			0		0			0		0			0		0			0		0			0		0			0
0			0		0			0		0			0		0			0		0			0		0			0		0			0		0			0		0			0		0			0
0			0		0			0		0			0		0			0		0			0		0			0		0			0		0			0		0			0		0			0
0			0		0			0		0			0		0			0		0			0		0			0		0			0		0			0		0			0		0			0
0			0		0			0		0			0		0			0		0			0		0			0		0			0		0			0		0			0		0			0
0			0		0			0		0			0		0			0		0			0		0			0		0			0		0			0		0			0		0			0
0			0		0			0		0			0		0			0		0			0		0			0		0			0		0			0		0			0		0			0
0			0		0			0		0			0		0			0		0			0		0			0		0			0		0			0		0			0		0			0
0			0		0			0		0			0		0			0		0			0		0			0		0			0		0			0		0			0		0			0
0			0		0			0		0			0		0			0		0			0		0			0		0			0		0			0		0			0		0			0
0			0		0			0		0			0		0			0		0			0		0			0		0			0		0			0		0			0		0			0
0			0		0			0		0			0		0			0		0			0		0			0		0			0		0			0		0			0		0			0
0			0		0			0		0			0		0			0		0			0		0			0		0			0		0			0		0			0		0			0
0			0		0			0		0			0		0			0		0			0		0			0		0			0		0			0		0			0		0			0
0			0		0			0		0			0		0			0		0			0		0			0		0			0		0			0		0			0		0			0
0			0		0			0		0			0		0			0		0			0		0			0		0			0		0			0		0			0		0			0
0			0		0			0		0			0		0			0		0			0		0			0		0			0		0			0		0			0		0			0
0			0		0			0		0			0		0			0		0			0		0			0		0			0		0			0		0			0		0			0
0			0		0			0		0			0		0			0		0			0		0			0		0			0		0			0		0			0		0			0
0			0		0			0		0			0		0			0		0			0		0			0		0			0		0			0		0			0		0			0
0			0		0			0		0			0		0			0		0			0		0			0		0			0		0			0		0			0		0			0
0			0		0			0		0			0		0			0		0			0		0			0		0			0		0			0		0			0		0			0
0			0		0			0		0			0		0			0		0			0		0			0		0			0		0			0		0			0		0			0
0			0		0			0		0			0		0			0		0			0		0			0		0			0		0			0		0			0		0			0
0			0		0			0		0			0		0			0		0			0		0			0		0			0		0			0		0			0		0			0
0			0		0			0		0			0		0			0		0			0		0			0		0			0		0			0		0			0		0			0
0			0		0			0		0			0		0			0		0			0		0			0		0			0		0			0		0			0		0			0
0			0		0			0		0			0		0			0		0			0		0			0		0			0		0			0		0			0		0			0
0			0		0			0		0			0		0			0		0			0		0			0		0			0		0			0		0			0		0			0
0			0		0			0		0			0		0			0		0			0		0			0		0			0		0			0		0			0		0			0
0			0		0			0		0			0		0			0		0			0		0			0		0			0		0			0		0			0		0			0
0			0		0			0		0			0		0			0		0			0		0			0		0			0		0			0		0			0		0			0
0			0		0			0		0			0		0			0		0			0		0			0		0			0		0			0		0			0		0			0
0			0		0			0		0			0		0			0		0			0		0			0		0			0		0			0		0			0		0			0
0			0		0			0		0			0		0			0		0			0		0			0		0			0		0			0		0			0		0			0
0			0		0			0		0			0		0			0		0			0		0			0		0			0		0			0		0			0		0			0
0			0		0			0		0			0		0			0		0			0		0			0		0			0		0			0		0			0		0			0
0			0		0			0		0			0		0			0		0			0		0			0		0			0		0			0		0			0		0			0
0			0		0			0		0			0		0			0		0			0		0			0		0			0		0			0		0			0		0			0
0			0		0			0		0			0		0			0		0			0		0			0		0			0		0			0		0			0		0			0
0			0		0			0		0			0		0			0		0			0		0			0		0			0		0			0		0			0		0			0
0			0		0			0		0			0		0			0		0			0		0			0		0			0		0			0		0			0		0			0
0			0		0			0		0			0		0			0		0			0		0			0		0			0		0			0		0			0		0			0
0			0		0			0		0			0		0			0		0			0		0			0		0			0		0			0		0			0		0			0
0			0		0			0		0			0		0			0		0			0		0			0		0			0		0			0		0			0		0			0
0			0		0			0		0			0		0			0		0			0		0			0		0			0		0			0		0			0		0			0
0			0		0			0		0			0		0			0		0			0		0			0		0			0		0			0		0			0		0			0
0			0		0			0		0			0		0			0		0			0		0			0		0			0		0			0		0			0		0			0
0			0		0			0		0			0		0			0		0			0		0			0		0			0		0			0		0			0		0			0
0			0		0			0		0			0		0			0		0			0		0			0		0			0		0			0		0			0		0			0
0			0		0			0		0			0		0			0		0			0		0			0		0			0		0			0		0			0		0			0
0			0		0			0		0			0		0			0		0			0		0			0		0			0		0			0		0			0		0			0
0			0		0			0		0			0		0			0		0			0		0			0		0			0		0			0		0			0		0			0
0			0		0			0		0			0		0			0		0			0		0			0		0			0		0			0		0			0		0			0
0			0		0			0		0			0		0			0		0			0		0			0		0			0		0			0		0			0		0			0
0			0		0			0		0			0		0			0		0			0		0			0		0			0		0			0		0			0		0			0
0			0		0			0		0			0		0			0		0			0		0			0		0			0		0			0		0			0		0			0
0			0		0			0		0			0		0			0		0			0		0			0		0			0		0			0		0			0		0			0
0			0		0			0		0			0		0			0		0			0		0			0		0			0		0			0		0			0		0			0
0			0		0			0		0			0		0			0		0			0		0			0		0			0		0			0		0			0		0			0
0			0		0			0		0			0		0			0		0			0		0			0		0			0		0			0		0			0		0			0
0			0		0			0		0			0		0			0		0			0		0			0		0			0		0			0		0			0		0			0
0			0		0			0		0			0		0			0		0			0		0			0		0			0		0			0		0			0		0			0
0			0		0			0		0			0		0			0		0			0		0			0		0			0		0			0		0			0		0			0
0			0		0			0		0			0		0			0		0			0		0			0		0			0		0			0		0			0		0			0
0			0		0			0		0			0		0			0		0			0		0			0		0			0		0			0		0			0		0			0
0			0		0			0		0			0		0			0		0			0		0			0		0			0		0			0		0			0		0			0
0			0		0			0		0			0		0			0		0			0		0			0		0			0		0			0		0			0		0			0
0			0		0			0		0			0		0			0		0			0		0			0		0			0		0			0		0			0		0			0
0			0		0			0		0			0		0			0		0			0		0			0		0			0		0			0		0			0		0			0
0			0		0			0		0			0		0			0		0			0		0			0		0			0		0			0		0			0		0			0
0			0		0			0		0			0		0			0		0			0		0			0		0			0		0			0		0			0		0			0
0			0		0			0		0			0		0			0		0			0		0			0		0			0		0			0		0			0		0			0
0			0		0			0		0			0		0			0		0			0		0			0		0			0		0			0		0			0		0			0
0			0		0			0		0			0		0			0		0			0		0			0		0			0		0			0		0			0		0			0
0			0		0			0		0			0		0			0		0			0		0			0		0			0		0			0		0			0		0			0
0			0		0			0		0			0		0			0		0			0		0			0		0			0		0			0		0			0		0			0
0			0		0			0		0			0		0			0		0			0		0			0		0			0		0			0		0			0		0			0
0			0		0			0		0			0		0			0		0			0		0			0		0			0		0			0		0			0		0			0
0			0		0			0		0			0		0			0		0			0		0			0		0			0		0			0		0			0		0			0
0			0		0			0		0			0		0			0		0			0		0			0		0			0		0			0		0			0		0			0
0			0		0			0		0			0		0			0		0			0		0			0		0			0		0			0		0			0		0			0
0			0		0			0		0			0		0			0		0			0		0			0		0			0		0			0		0			0		0			0
0			0		0			0		0			0		0			0		0			0		0			0		0			0		0			0		0			0		0			0
0			0		0			0		0			0		0			0		0			0		0			0		0			0		0			0		0			0		0			0
0			0		0			0		0			0		0			0		0			0		0			0		0			0		0			0		0			0		0			0
0			0		0			0		0			0		0			0		0			0		0			0		0			0		0			0		0			0		0			0
0			0		0			0		0			0		0			0		0			0		0			0		0			0		0			0		0			0		0			0
0			0		0			0		0			0		0			0		0			0		0			0		0			0		0			0		0			0		0			0
0			0		0			0		0			0		0			0		0			0		0			0		0			0		0			0		0			0		0			0
0			0		0			0		0			0		0			0		0			0		0			0		0			0		0			0		0			0		0			0
0			0		0			0		0			0		0			0		0			0		0			0		0			0		0			0		0			0		0			0
0			0		0			0		0			0		0			0		0			0		0			0		0			0		0			0		0			0		0			0
0			0		0			0		0			0		0			0		0			0		0			0		0			0		0			0		0			0		0			0
0			0		0			0		0			0		0			0		0			0		0			0		0			0		0			0		0			0		0			0
0			0		0			0		0			0		0			0		0			0		0			0		0			0		0			0		0			0		0			0
0			0		0			0		0			0		0			0		0			0		0			0		0			0		0			0		0			0		0			0
0			0		0			0		0			0		0			0		0			0		0			0		0			0		0			0		0			0		0			0
0			0		0			0		0			0		0			0		0			0		0			0		0			0		0			0		0			0		0			0
0			0		0			0		0			0		0			0		0			0		0			0		0			0		0			0		0			0		0			0
0			0		0			0		0			0		0			0		0			0		0			0		0			0		0			0		0			0		0			0
0			0		0			0		0			0		0			0		0			0		0			0		0			0		0			0		0			0		0			0
0			0		0			0		0			0		0			0		0			0		0			0		0			0		0			0		0			0		0			0
0			0		0			0		0			0		0			0		0			0		0			0		0			0		0			0		0			0		0			0
0			0		0			0		0			0		0			0		0			0		0			0		0			0		0			0		0			0		0			0
[truncated: 48 more columns]

## Sheet: raw data_prim cell PDMS 2500kPA
		2021-03-24 primary T cell full AB PDMS cell 2-1 cell body					2021-03-24 primary T cell full AB PDMS cell 2-1 lamellipodium					2021-03-24 primary T cell full AB PDMS cell 3-1 cell body					2021-03-24 primary T cell full AB PDMS cell 3-1 lamellipodium					2021-03-24 primary T cell full AB PDMS cell 4-1 cell body					2021-03-24 primary T cell full AB PDMS cell 4-1 lamellipodium					2021-03-24 primary T cell full AB PDMS cell 5-1 cell body					2021-03-24 primary T cell full AB PDMS cell 5-1 lamellipodium					2021-04-21 primary T cell full AB PDMS cell 1-1 cell body					2021-04-21 primary T cell full AB PDMS cell 1-1 lamellipodium
		Average	156.133				Average	207.165				Average	129.102				Average	259.402				Average	211.482				Average	243.453				Average	140.535				Average	326.07				Average	158.138				Average	329.525
		StDev	47.0734				StDev	70.182				StDev	41.8066				StDev	107.249				StDev	105.251				StDev	134.124				StDev	37.1953				StDev	66.2764				StDev	66.3838				StDev	170.244
				setp					setp					setp					setp					setp					setp					setp					setp					setp					setp
		kPa	%				kPa	%				kPa	%				kPa	%				kPa	%				kPa	%				kPa	%				kPa	%				kPa	%				kPa	%
	0	0	0.892857	217.656		0	0	1.25	536.466		0	0	1	166.673		0	0	0.909091	611.723		0	0	1.66667	745.414		0	0	1.5625	926.085		0	0	0.50505	99.7484		0	0	0.909091	966.56		0	0	1	250.076		0	0	1.51515	1645.25
	0	0.484321	0	0		0	0.732387	0	0		0	0.43707	0	0		0	0.968642	0	0		0	1.15765	0	0		0	0.956829	0	0		0	0.472508	0	0		0	0.956829	0	0		0	0.638889	0	0		0	1.46772	0	0
	0	0.968642	0	0		0	1.46477	0	0		0	0.87414	0	0		0	1.93728	0	0		0	2.31529	0	0		0	1.91366	0	0		0	0.945016	0	0		0	1.91366	0	0		0	1.27778	0	0		0	2.93544	0	0
	0	1.45296	0	0		0	2.19716	0	0		0	1.31121	0	0		0	2.90592	0	0		0	3.47293	0	0		0	2.87049	0	0		0	1.41752	0	0		0	2.87049	0	0		0	1.91667	0	0		0	4.40315	0	0
	0	1.93728	0	0		0	2.92955	0	0		0	1.74828	0	0		0	3.87457	0	0		0	4.63058	0	0		0	3.82732	0	0		0	1.89003	0	0		0	3.82732	0	0		0	2.55556	0	0		0	5.87087	0	0
	0	2.4216	0	0		0	3.66194	0	0		0	2.18535	0	0		0	4.84321	0	0		0	5.78822	0	0		0	4.78414	0	0		0	2.36254	0	0		0	4.78414	0	0		0	3.19445	0	0		0	7.33859	0	0
	0	2.90592	0	0		0	4.39433	0	0		0	2.62242	0	0		0	5.81185	0	0		0	6.94587	0	0		0	5.74097	0	0		0	2.83505	0	0		0	5.74097	0	0		0	3.83333	0	0		0	8.80631	0	0
	0	3.39025	0	0		0	5.12671	0	0		0	3.05949	0	0		0	6.78049	0	0		0	8.10351	0	0		0	6.6978	0	0		0	3.30756	0	0		0	6.6978	0	0		0	4.47222	0	0		0	10.274	0	0
	0	3.87457	0	0		0	5.8591	0	0		0	3.49656	0	0		0	7.74913	0	0		0	9.26116	0	0		0	7.65463	0	0		0	3.78006	0	0		0	7.65463	0	0		0	5.11111	0	0		0	11.7417	0	0
	0	4.35889	0	0		0	6.59149	0	0		0	3.93363	0	0		0	8.71777	0	0		0	10.4188	0	0		0	8.61146	0	0		0	4.25257	0	0		0	8.61146	0	0		0	5.75	0	0		0	13.2095	0	0
	0	4.84321	0	0		0	7.32388	0	0		0	4.3707	0	0		0	9.68642	0	0		0	11.5764	0	0		0	9.56829	0	0		0	4.72508	0	0		0	9.56829	0	0		0	6.38889	0	0		0	14.6772	0	0
	0	5.32753	0	0		0	8.05626	0	0		0	4.80777	0	0		0	10.6551	0	0		0	12.7341	0	0		0	10.5251	0	0		0	5.19759	0	0		0	10.5251	0	0		0	7.02778	0	0		0	16.1449	0	0
	0	5.81185	0	0		0	8.78865	0	0		0	5.24484	0	0		0.10567	11.6237	0.909091	558.129		0	13.8917	0	0		0	11.4819	0	0		0	5.6701	0	0		0	11.4819	0	0		0	7.66667	0	0		0	17.6126	0	0
	0	6.29617	0	0		0	9.52104	0	0		0	5.68191	0	0		0	12.5923	0	0		0	15.0494	0	0		0	12.4388	0	0		0	6.1426	0	0		0	12.4388	0	0		0	8.30556	0	0		0	19.0803	0	0
	0	6.78049	0	0		0	10.2534	0	0		0	6.11898	0	0		0	13.561	0	0		0	16.207	0	0		0	13.3956	0	0		0	6.61511	0	0		0	13.3956	0	0		0	8.94445	0	0		0	20.548	0	0
	0	7.26481	0	0		0	10.9858	0	0		0	6.55605	0	0		0	14.5296	0	0		0	17.3647	0	0		0	14.3524	0	0		0	7.08762	0	0		0	14.3524	0	0		0	9.58334	0	0		0	22.0158	0	0
	0	7.74913	0	0		0	11.7182	0	0		0	6.99312	0	0		0	15.4983	0	0		0	18.5223	0	0		0	15.3093	0	0		0	7.56013	0	0		0	15.3093	0	0		0	10.2222	0	0		0	23.4835	0	0
	0	8.23345	0	0		0	12.4506	0	0		0	7.43019	0	0		0	16.4669	0	0		0	19.68	0	0		0	16.2661	0	0		0	8.03264	0	0		0	16.2661	0	0		0	10.8611	0	0		0	24.9512	0	0
	0	8.71777	0	0		0	13.183	0	0		0	7.86726	0	0		0	17.4355	0	0		0	20.8376	0	0		0	17.2229	0	0		0	8.50515	0	0		0	17.2229	0	0		0	11.5	0	0		0	26.4189	0	0
	0	9.20209	0	0		0	13.9154	0	0		0	8.30433	0	0		0	18.4042	0	0		0	21.9952	0	0		0.284059	18.1797	1.5625	792.939		0	8.97765	0	0		0	18.1797	0	0		0	12.1389	0	0		0	27.8866	0	0
	0	9.68642	0	0		0	14.6478	0	0		0	8.7414	0	0		0	19.3728	0	0		0	23.1529	0	0		0	19.1366	0	0		0	9.45016	0	0		0	19.1366	0	0		0	12.7778	0	0		0	29.3544	0	0
	0	10.1707	0	0		0	15.3801	0	0		0	9.17847	0	0		0	20.3415	0	0		0.202588	24.3105	0.833333	291.944		0	20.0934	0	0		0	9.92267	0	0		0	20.0934	0	0		0	13.4167	0	0		0	30.8221	0	0
	0	10.6551	0	0		0	16.1125	0	0		0	9.61554	0	0		0	21.3101	0	0		0	25.4682	0	0		0	21.0502	0	0		0	10.3952	0	0		0	21.0502	0	0		0	14.0556	0	0		0	32.2898	0	0
	0	11.1394	0	0		0	16.8449	0	0		0	10.0526	0	0		0	22.2788	0	0		0	26.6258	0	0		0	22.0071	0	0		0	10.8677	0	0		0	22.0071	0	0		0	14.6944	0	0		0	33.7575	0	0
	0	11.6237	0	0		0	17.5773	0	0		0	10.4897	0	0		0	23.2474	0	0		0	27.7835	0	0		0	22.9639	0	0		0	11.3402	0	0		0	22.9639	0	0		0	15.3333	0	0		0.533716	35.2252	1.51515	1312.31
	0	12.108	0	0		0	18.3097	0	0		0	10.9268	0	0		0	24.216	0	0		0	28.9411	0	0		0.373761	23.9207	1.5625	753.039		0	11.8127	0	0		0	23.9207	0	0		0	15.9722	0	0		0	36.693	0	0
	0	12.5923	0	0		0	19.0421	0	0		0	11.3638	0	0		0	25.1847	0	0		0.250823	30.0988	0.833333	274.167		0	24.8775	0	0		0	12.2852	0	0		0	24.8775	0	0		0	16.6111	0	0		0	38.1607	0	0
	0	13.0767	0	0		0	19.7745	0	0		0	11.8009	0	0		0	26.1533	0	0		0	31.2564	0	0		0	25.8344	0	0		0	12.7577	0	0		0	25.8344	0	0		0	17.25	0	0		0	39.6284	0	0
	0	13.561	0	0		0	20.5069	0	0		0.244759	12.238	2	273.143		0	27.122	0	0		0	32.4141	0	0		0	26.7912	0	0		0	13.2302	0	0		0	26.7912	0	0		0.357778	17.8889	2	393.395		0	41.0961	0	0
	0	14.0453	0	0		0	21.2392	0	0		0	12.675	0	0		0	28.0906	0	0		0	33.5717	0	0		0	27.748	0	0		0	13.7027	0	0		0	27.748	0	0		0	18.5278	0	0		0	42.5638	0	0
	0	14.5296	0	0		0	21.9716	0	0		0	13.1121	0	0		0	29.0592	0	0		0	34.7293	0	0		0	28.7049	0	0		0	14.1752	0	0		0	28.7049	0	0		0	19.1667	0	0		0.667145	44.0315	1.51515	1234.95
	0	15.0139	0	0		0	22.704	0	0		0	13.5492	0	0		0	30.0279	0	0		1.49529	35.887	4.16667	1284.74		0	29.6617	0	0		0	14.6478	0	0		0	29.6617	0	0		0	19.8056	0	0		0	45.4993	0	0
	0	15.4983	0	0		0	23.4364	0	0		0	13.9862	0	0		0	30.9965	0	0		0	37.0446	0	0		0.956829	30.6185	3.125	1415.58		0	15.1203	0	0		0	30.6185	0	0		0	20.4444	0	0		0	46.967	0	0
	0	15.9826	0	0		0	24.1688	0	0		0	14.4233	0	0		0	31.9652	0	0		0	38.2023	0	0		0	31.5754	0	0		0	15.5928	0	0		0	31.5754	0	0		0	21.0833	0	0		0	48.4347	0	0
	0	16.4669	0	0		0	24.9012	0	0		0	14.8604	0	0		0	32.9338	0	0		0	39.3599	0	0		0	32.5322	0	0		0	16.0653	0	0		0	32.5322	0	0		0	21.7222	0	0		0	49.9024	0	0
	0	16.9512	0	0		0	25.6336	0	0		0	15.2974	0	0		0	33.9025	0	0		0	40.5176	0	0		0	33.489	0	0		0	16.5378	0	0		0	33.489	0	0		0	22.3611	0	0		0	51.3701	0	0
	0	17.4355	0	0		0	26.366	0	0		0	15.7345	0	0		0	34.8711	0	0		0	41.6752	0	0		0	34.4458	0	0		0	17.0103	0	0		0	34.4458	0	0		0	23	0	0		0	52.8379	0	0
	0	17.9199	0	0		0	27.0983	0	0		0	16.1716	0	0		0	35.8397	0	0		0.356941	42.8329	0.833333	237.022		0	35.4027	0	0		0	17.4828	0	0		0	35.4027	0	0		0	23.6389	0	0		0	54.3056	0	0
	0	18.4042	0	0		0	27.8307	0	0		0	16.6087	0	0		0	36.8084	0	0		0	43.9905	0	0		0.568117	36.3595	1.5625	670.121		0	17.9553	0	0		0	36.3595	0	0		0	24.2778	0	0		0	55.7733	0	0
	0	18.8885	0	0		0	28.5631	0	0		0	17.0457	0	0		0	37.777	0	0		0	45.1481	0	0		0	37.3163	0	0		0	18.4278	0	0		0	37.3163	0	0		0	24.9167	0	0		0	57.241	0	0
	0	19.3728	0	0		0	29.2955	0	0		0	17.4828	0	0		0	38.7457	0	0		0	46.3058	0	0		0	38.2732	0	0		0	18.9003	0	0		0	38.2732	0	0		0	25.5556	0	0		0	58.7087	0	0
	0	19.8572	0	0		0	30.0279	0	0		0	17.9199	0	0		0	39.7143	0	0		0	47.4634	0	0		0	39.23	0	0		0	19.3728	0	0		0	39.23	0	0		0	26.1945	0	0		0	60.1765	0	0
	0	20.3415	0	0		0	30.7603	0	0		0	18.3569	0	0		0	40.6829	0	0		0	48.6211	0	0		0	40.1868	0	0		0	19.8453	0	0		0	40.1868	0	0		0	26.8333	0	0		0	61.6442	0	0
	0	20.8258	0	0		0	31.4927	0	0		0	18.794	0	0		0	41.6516	0	0		0	49.7787	0	0		0	41.1436	0	0		0	20.3178	0	0		0	41.1436	0	0		0	27.4722	0	0		0	63.1119	0	0
	0	21.3101	0	0		0	32.2251	0	0		0	19.2311	0	0		0	42.6202	0	0		0	50.9364	0	0		0	42.1005	0	0		0	20.7904	0	0		0	42.1005	0	0		0	28.1111	0	0		0	64.5796	0	0
	0	21.7944	0	0		0	32.9574	0	0		0	19.6682	0	0		0	43.5889	0	0		0	52.094	0	0		0	43.0573	0	0		0	21.2629	0	0		0	43.0573	0	0		0	28.75	0	0		0	66.0473	0	0
	0	22.2788	0	0		0	33.6898	0	0		0	20.1052	0	0		0	44.5575	0	0		0	53.2517	0	0		0	44.0141	0	0		0	21.7354	0	0		0	44.0141	0	0		0	29.3889	0	0		0	67.515	0	0
	0	22.7631	0	0		0	34.4222	0	0		0	20.5423	0	0		0	45.5262	0	0		1.81364	54.4093	3.33333	822.399		0	44.971	0	0		0	22.2079	0	0		0	44.971	0	0		0	30.0278	0	0		0	68.9828	0	0
	0	23.2474	0	0		0	35.1546	0	0		0	20.9794	0	0		0	46.4948	0	0		0	55.5669	0	0		0	45.9278	0	0		0	22.6804	0	0		0	45.9278	0	0		0	30.6667	0	0		0	70.4505	0	0
	0	23.7317	0	0		0	35.887	0	0		0	21.4164	0	0		0	47.4634	0	0		0	56.7246	0	0		0	46.8846	0	0		0	23.1529	0	0		0	46.8846	0	0		0	31.3056	0	0		0	71.9182	0	0
	0	24.216	0	0		0	36.6194	0	0		0	21.8535	0	0		0	48.4321	0	0		0	57.8822	0	0		1.49505	47.8414	3.125	1195.75		0	23.6254	0	0		0	47.8414	0	0		0	31.9445	0	0		0	73.3859	0	0
	0	24.7004	0	0		0	37.3518	0	0		0	22.2906	0	0		0	49.4007	0	0		0	59.0399	0	0		0	48.7983	0	0		0	24.0979	0	0		0	48.7983	0	0		0	32.5833	0	0		0	74.8536	0	0
	0	25.1847	0	0		0	38.0842	0	0		0	22.7276	0	0		0	50.3694	0	0		0	60.1975	0	0		0	49.7551	0	0		0	24.5704	0	0		0	49.7551	0	0		0	33.2222	0	0		0	76.3213	0	0
	0	25.669	0	0		0	38.8165	0	0		0	23.1647	0	0		0	51.338	0	0		0	61.3552	0	0		0	50.7119	0	0		0	25.0429	0	0		0	50.7119	0	0		0	33.8611	0	0		0	77.7891	0	0
	0	26.1533	0	0		0	39.5489	0	0		0	23.6018	0	0		0	52.3066	0	0		0	62.5128	0	0		0	51.6688	0	0		0	25.5154	0	0		0	51.6688	0	0		0	34.5	0	0		1.20086	79.2568	1.51515	949.003
	0	26.6376	0	0		0	40.2813	0	0		0.240389	24.0389	1	110.382		0	53.2753	0	0		0	63.6705	0	0		0	52.6256	0	0		0	25.9879	0	0		0	52.6256	0	0		0	35.1389	0	0		0	80.7245	0	0
	0	27.122	0	0		0	41.0137	0	0		0	24.4759	0	0		0.493127	54.2439	0.909091	382.636		0	64.8281	0	0		0	53.5824	0	0		0	26.4605	0	0		0	53.5824	0	0		0	35.7778	0	0		0	82.1922	0	0
	0	27.6063	0	0		0	41.7461	0	0		0	24.913	0	0		0	55.2126	0	0		1.64964	65.9857	2.5	529.232		0	54.5392	0	0		0	26.933	0	0		0	54.5392	0	0		0	36.4167	0	0		0	83.6599	0	0
	0	28.0906	0	0		0	42.4785	0	0		0	25.3501	0	0		0	56.1812	0	0		0	67.1434	0	0		0	55.4961	0	0		0	27.4055	0	0		0	55.4961	0	0		0	37.0556	0	0		0	85.1277	0	0
	0	28.5749	0	0		0	43.2109	0	0		0	25.7871	0	0		0	57.1499	0	0		0	68.301	0	0		0	56.4529	0	0		0	27.878	0	0		0	56.4529	0	0		0	37.6945	0	0		0	86.5954	0	0
	0	29.0592	0	0		0	43.9432	0	0		0	26.2242	0	0		0	58.1185	0	0		0	69.4587	0	0		0	57.4097	0	0		0	28.3505	0	0		0	57.4097	0	0		0	38.3334	0	0		0	88.0631	0	0
	0	29.5436	0	0		0	44.6756	0	0		0	26.6613	0	0		0	59.0871	0	0		0	70.6163	0	0		0	58.3665	0	0		0	28.823	0	0		0	58.3665	0	0		0	38.9722	0	0		0	89.5308	0	0
	0	30.0279	0	0		0	45.408	0	0		0	27.0983	0	0		0	60.0558	0	0		0	71.774	0	0		0	59.3234	0	0		0	29.2955	0	0		0	59.3234	0	0		0	39.6111	0	0		0	90.9985	0	0
	0	30.5122	0	0		0	46.1404	0	0		0	27.5354	0	0		0	61.0244	0	0		0.607764	72.9316	0.833333	159.969		1.88376	60.2802	3.125	1048.51		0	29.768	0	0		0	60.2802	0	0		0	40.25	0	0		0	92.4662	0	0
	0	30.9965	0	0		0	46.8728	0	0		0	27.9725	0	0		0	61.9931	0	0		0	74.0893	0	0		0	61.237	0	0		0.30546	30.2405	1.0101	122.878		0	61.237	0	0		0	40.8889	0	0		0	93.934	0	0
	0	31.4809	0	0		0	47.6052	0	0		0	28.4095	0	0		0	62.9617	0	0		0	75.2469	0	0		0	62.1939	0	0		0	30.713	0	0		0	62.1939	0	0		0	41.5278	0	0		0	95.4017	0	0
	0	31.9652	0	0		0	48.3376	0	0		0	28.8466	0	0		0	63.9303	0	0		0	76.4046	0	0		0	63.1507	0	0		0	31.1855	0	0		0	63.1507	0	0		0	42.1667	0	0		2.93544	96.8694	3.0303	1640.26
	0	32.4495	0	0		0	49.07	0	0		0	29.2837	0	0		0	64.899	0	0		0	77.5622	0	0		0	64.1075	0	0		0	31.658	0	0		0	64.1075	0	0		0	42.8056	0	0		0	98.3371	0	0
	0	32.9338	0	0		0	49.8023	0	0		0	29.7208	0	0		0	65.8676	0	0		0	78.7198	0	0		0	65.0644	0	0		0	32.1305	0	0		0	65.0644	0	0		0	43.4445	0	0		0	99.8048	0	0
	0	33.4181	0	0		0	50.5347	0	0		0.301578	30.1578	1	97.8989		0	66.8363	0	0		0	79.8775	0	0		1.03158	66.0212	1.5625	491.908		0	32.6031	0	0		0	66.0212	0	0		0.881667	44.0834	2	260.169		0	101.273	0	0
	0	33.9025	0	0		0	51.2671	0	0		0	30.5949	0	0		0	67.8049	0	0		0	81.0351	0	0		0	66.978	0	0		0	33.0756	0	0		0	66.978	0	0		0	44.7222	0	0		0	102.74	0	0
	0	34.3868	0	0		0	51.9995	0	0		0	31.032	0	0		0	68.7736	0	0		0	82.1928	0	0		0	67.9348	0	0		0	33.5481	0	0		0	67.9348	0	0		0	45.3611	0	0		0	104.208	0	0
	0	34.8711	0	0		0	52.7319	0	0		0	31.469	0	0		0	69.7422	0	0		0	83.3504	0	0		0	68.8917	0	0		0	34.0206	0	0		0	68.8917	0	0		0	46	0	0		0	105.676	0	0
	0	35.3554	0	0		0	53.4643	0	0		0	31.9061	0	0		0	70.7108	0	0		0.704234	84.5081	0.833333	134.354		0	69.8485	0	0		0	34.4931	0	0		0	69.8485	0	0		0	46.6389	0	0		0	107.143	0	0
	0	35.8397	0	0		1.35492	54.1967	2.5	584.982		0	32.3432	0	0		0	71.6795	0	0		0	85.6657	0	0		0	70.8053	0	0		0	34.9656	0	0		0	70.8053	0	0		0	47.2778	0	0		0	108.611	0	0
	0	36.3241	0	0		0	54.9291	0	0		0	32.7803	0	0		0.660437	72.6481	0.909091	317.064		0	86.8234	0	0		0	71.7622	0	0		0	35.4381	0	0		0	71.7622	0	0		0	47.9167	0	0		0	110.079	0	0
	0	36.8084	0	0		0	55.6615	0	0		0	33.2173	0	0		0	73.6167	0	0		0	87.981	0	0		1.13623	72.719	1.5625	455.471		0	35.9106	0	0		0	72.719	0	0		0	48.5556	0	0		0	111.547	0	0
	0	37.2927	0	0		0	56.3938	0	0		0	33.6544	0	0		0	74.5854	0	0		0	89.1386	0	0		0	73.6758	0	0		0	36.3831	0	0		0	73.6758	0	0		0	49.1945	0	0		0	113.014	0	0
	0	37.777	0	0		0	57.1262	0	0		0	34.0915	0	0		0	75.554	0	0		1.50494	90.2963	1.66667	244.768		0	74.6326	0	0		0	36.8556	0	0		0	74.6326	0	0		0	49.8334	0	0		3.46915	114.482	3.0303	1401.32
	0	38.2613	0	0		0	57.8586	0	0		0	34.5285	0	0		0	76.5227	0	0		0	91.4539	0	0		0	75.5895	0	0		0	37.3281	0	0		0	75.5895	0	0		0	50.4722	0	0		0	115.95	0	0
	0	38.7457	0	0		0	58.591	0	0		0	34.9656	0	0		0	77.4913	0	0		0	92.6116	0	0		0	76.5463	0	0		0	37.8006	0	0		0	76.5463	0	0		0	51.1111	0	0		0	117.418	0	0
	0	39.23	0	0		0	59.3234	0	0		0	35.4027	0	0		0.713272	78.46	0.909091	297.637		0	93.7692	0	0		0	77.5031	0	0		0	38.2732	0	0		0	77.5031	0	0		0	51.75	0	0		0	118.885	0	0
	0	39.7143	0	0		0	60.0558	0	0		0	35.8397	0	0		0	79.4286	0	0		0	94.9269	0	0		0	78.46	0	0		0	38.7457	0	0		0	78.46	0	0		0	52.3889	0	0		0	120.353	0	0
	0	40.1986	0	0		0	60.7882	0	0		0	36.2768	0	0		0	80.3972	0	0		1.60141	96.0845	1.66667	221.945		0	79.4168	0	0		0	39.2182	0	0		0	79.4168	0	0		1.06056	53.0278	2	220.962		0	121.821	0	0
	0	40.6829	0	0		0	61.5206	0	0		0	36.7139	0	0		0	81.3659	0	0		0	97.2422	0	0		0	80.3736	0	0		0	39.6907	0	0		0	80.3736	0	0		0	53.6667	0	0		0	123.288	0	0
	0	41.1673	0	0		0	62.2529	0	0		0	37.151	0	0		0	82.3345	0	0		0	98.3998	0	0		0	81.3304	0	0		0	40.1632	0	0		0	81.3304	0	0		0	54.3056	0	0		0	124.756	0	0
	0	41.6516	0	0		0	62.9853	0	0		0	37.588	0	0		0	83.3032	0	0		0	99.5575	0	0		0	82.2873	0	0		0	40.6357	0	0		0	82.2873	0	0		0	54.9445	0	0		0	126.224	0	0
	0	42.1359	0	0		0	63.7177	0	0		0	38.0251	0	0		0.766107	84.2718	0.909091	278.824		0	100.715	0	0		0	83.2441	0	0		0	41.1082	0	0		0	83.2441	0	0		0	55.5834	0	0		0	127.692	0	0
	0	42.6202	0	0		0	64.4501	0	0		0	38.4622	0	0		0	85.2404	0	0		0	101.873	0	0		0	84.2009	0	0		0	41.5807	0	0		0	84.2009	0	0		0	56.2222	0	0		0	129.159	0	0
	0	43.1046	0	0		0	65.1825	0	0		0	38.8992	0	0		0	86.2091	0	0		0.858587	103.03	0.833333	98.0153		0	85.1578	0	0		0	42.0532	0	0		0	85.1578	0	0		0	56.8611	0	0		0	130.627	0	0
	0	43.5889	0	0		0	65.9149	0	0		0	39.3363	0	0		0	87.1777	0	0		0	104.188	0	0		0	86.1146	0	0		0	42.5257	0	0		0	86.1146	0	0		0	57.5	0	0		4.00287	132.095	3.0303	1181.17
	0	44.0732	0	0		0	66.6473	0	0		0	39.7734	0	0		0	88.1464	0	0		0	105.346	0	0		0	87.0714	0	0		0	42.9982	0	0		0	87.0714	0	0		0	58.1389	0	0		0	133.562	0	0
	0	44.5575	0	0		0	67.3796	0	0		0	40.2104	0	0		0	89.115	0	0		0	106.503	0	0		0	88.0282	0	0		0	43.4707	0	0		0	88.0282	0	0		0	58.7778	0	0		0	135.03	0	0
	0	45.0418	0	0		0	68.112	0	0		0	40.6475	0	0		0	90.0837	0	0		0	107.661	0	0		0	88.9851	0	0		0	43.9432	0	0		0	88.9851	0	0		0	59.4167	0	0		0	136.498	0	0
	0	45.5262	0	0		0	68.8444	0	0		0	41.0846	0	0		0	91.0523	0	0		0	108.819	0	0		0	89.9419	0	0		0	44.4158	0	0		0	89.9419	0	0		0	60.0556	0	0		0	137.965	0	0
	0	46.0105	0	0		0	69.5768	0	0		0	41.5216	0	0		0	92.0209	0	0		0	109.976	0	0		1.42029	90.8987	1.5625	363.638		0	44.8883	0	0		0	90.8987	0	0		0	60.6945	0	0		0	139.433	0	0
	0	46.4948	0	0		0	70.3092	0	0		0	41.9587	0	0		0	92.9896	0	0		0	111.134	0	0		0	91.8556	0	0		0	45.3608	0	0		0	91.8556	0	0		0	61.3334	0	0		2.13486	140.901	1.51515	539.077
	0	46.9791	0	0		0	71.0416	0	0		0	42.3958	0	0		0	93.9582	0	0		0	112.291	0	0		0	92.8124	0	0		0	45.8333	0	0		0	92.8124	0	0		1.23944	61.9722	2	184.956		0	142.369	0	0
	0	47.4634	0	0		0	71.774	0	0		0	42.8329	0	0		0	94.9269	0	0		0	113.449	0	0		0	93.7692	0	0		0	46.3058	0	0		0	93.7692	0	0		0	62.6111	0	0		0	143.836	0	0
	0	47.9477	0	0		0.906329	72.5064	1.25	226.662		0	43.2699	0	0		0	95.8955	0	0		2.86517	114.607	2.5	234.622		0	94.7261	0	0		0	46.7783	0	0		0	94.7261	0	0		0	63.25	0	0		0	145.304	0	0
	0.432429	48.4321	0.892857	103.567		0	73.2387	0	0		0	43.707	0	0		0.880583	96.8641	0.909091	240.169		0	115.764	0	0		0	95.6829	0	0		0	47.2508	0	0		0	95.6829	0	0		0	63.8889	0	0		0	146.772	0	0
	0	48.9164	0	0		0	73.9711	0	0		0	44.1441	0	0		0	97.8328	0	0		0	116.922	0	0		0	96.6397	0	0		0	47.7233	0	0		0	96.6397	0	0		0	64.5278	0	0		0	148.239	0	0
	0	49.4007	0	0		0	74.7035	0	0		0	44.5811	0	0		0	98.8014	0	0		0	118.08	0	0		0	97.5965	0	0		0.486826	48.1958	1.0101	86.1272		0	97.5965	0	0		0	65.1667	0	0		2.26829	149.707	1.51515	489.915
	0	49.885	0	0		0	75.4359	0	0		0	45.0182	0	0		0	99.7701	0	0		0	119.237	0	0		0	98.5534	0	0		0	48.6683	0	0		0	98.5534	0	0		0	65.8056	0	0		0	151.175	0	0
	0	50.3694	0	0		0	76.1683	0	0		0	45.4553	0	0		0	100.739	0	0		0	120.395	0	0		0	99.5102	0	0		0	49.1408	0	0		0	99.5102	0	0		0	66.4445	0	0		0	152.643	0	0
	0	50.8537	0	0		0	76.9007	0	0		0	45.8923	0	0		0	101.707	0	0		0	121.553	0	0		0	100.467	0	0		0	49.6133	0	0		0	100.467	0	0		0	67.0834	0	0		0	154.11	0	0
	0	51.338	0	0		0	77.6331	0	0		0	46.3294	0	0		0.933418	102.676	0.909091	223.301		0	122.71	0	0		0	101.424	0	0		0	50.0859	0	0		0	101.424	0	0		0	67.7223	0	0		0	155.578	0	0
	0	51.8223	0	0		0	78.3654	0	0		0	46.7665	0	0		0	103.645	0	0		0	123.868	0	0		0	102.381	0	0		0	50.5584	0	0		0	102.381	0	0		0	68.3611	0	0		0	157.046	0	0
	0	52.3066	0	0		0	79.0978	0	0		0	47.2035	0	0		0	104.613	0	0		0	125.026	0	0		0	103.338	0	0		0	51.0309	0	0		0	103.338	0	0		0	69	0	0		0	158.514	0	0
	0	52.791	0	0		0	79.8302	0	0		0	47.6406	0	0		0	105.582	0	0		0	126.183	0	0		0	104.294	0	0		0	51.5034	0	0		0	104.294	0	0		0	69.6389	0	0		0	159.981	0	0
	0	53.2753	0	0		0	80.5626	0	0		0	48.0777	0	0		0	106.551	0	0		3.18352	127.341	2.5	176.995		0	105.251	0	0		0	51.9759	0	0		0	105.251	0	0		2.81111	70.2778	4	308.775		0	161.449	0	0
	0	53.7596	0	0		0	81.295	0	0		0	48.5148	0	0		0	107.519	0	0		0	128.499	0	0		0	106.208	0	0		0	52.4484	0	0		0	106.208	0	0		0	70.9167	0	0		0	162.917	0	0
	0	54.2439	0	0		0	82.0274	0	0		0	48.9518	0	0		0	108.488	0	0		0	129.656	0	0		0	107.165	0	0		0	52.9209	0	0		0	107.165	0	0		0	71.5556	0	0		0	164.384	0	0
	0	54.7283	0	0		0	82.7598	0	0		0	49.3889	0	0		0	109.457	0	0		0	130.814	0	0		0	108.122	0	0		0	53.3934	0	0		0	108.122	0	0		0	72.1945	0	0		0	165.852	0	0
	0	55.2126	0	0		0	83.4922	0	0		0	49.826	0	0		0	110.425	0	0		0	131.971	0	0		0	109.079	0	0		0	53.8659	0	0		0	109.079	0	0		0	72.8334	0	0		2.53515	167.32	1.51515	398.644
	0	55.6969	0	0		0	84.2245	0	0		0	50.263	0	0		0	111.394	0	0		0	133.129	0	0		0	110.035	0	0		0.548873	54.3384	1.0101	75.0496		0	110.035	0	0		0	73.4723	0	0		0	168.788	0	0
	0	56.1812	0	0		0	84.957	0	0		0	50.7001	0	0		0	112.362	0	0		0	134.287	0	0		0	110.992	0	0		0	54.8109	0	0		0	110.992	0	0		0	74.1111	0	0		0	170.255	0	0
	0	56.6655	0	0		0	85.6893	0	0		0	51.1372	0	0		0	113.331	0	0		0	135.444	0	0		0	111.949	0	0		0	55.2834	0	0		0	111.949	0	0		0	74.75	0	0		0	171.723	0	0
	0	57.1499	0	0		0	86.4217	0	0		0	51.5742	0	0		3.11726	114.3	2.72727	574.22		0	136.602	0	0		0	112.906	0	0		0	55.7559	0	0		0	112.906	0	0		0	75.3889	0	0		0	173.191	0	0
	0	57.6342	0	0		0	87.1541	0	0		0	52.0113	0	0		0	115.268	0	0		0	137.76	0	0		0	113.863	0	0		0	56.2285	0	0		0	113.863	0	0		0	76.0278	0	0		0	174.659	0	0
	0	58.1185	0	0		0	87.8865	0	0		0	52.4484	0	0		0	116.237	0	0		0	138.917	0	0		3.58811	114.82	3.125	517.082		0	56.701	0	0		0	114.82	0	0		0	76.6667	0	0		0	176.126	0	0
	0	58.6028	0	0		0	88.6189	0	0		0	52.8855	0	0		0	117.206	0	0		0	140.075	0	0		0	115.776	0	0		0	57.1735	0	0		0	115.776	0	0		0	77.3056	0	0		0	177.594	0	0
	0	59.0871	0	0		0	89.3513	0	0		0	53.3225	0	0		0	118.174	0	0		0	141.233	0	0		0	116.733	0	0		0	57.646	0	0		0	116.733	0	0		0	77.9445	0	0		0	179.062	0	0
	0	59.5715	0	0		0	90.0837	0	0		0	53.7596	0	0		0	119.143	0	0		0	142.39	0	0		0	117.69	0	0		0	58.1185	0	0		0	117.69	0	0		0	78.5834	0	0		0	180.529	0	0
	0	60.0558	0	0		0	90.8161	0	0		0	54.1967	0	0		0	120.112	0	0		0	143.548	0	0		0	118.647	0	0		0	58.591	0	0		0	118.647	0	0		2.37667	79.2223	3	186.83		0	181.997	0	0
	0	60.5401	0	0		0	91.5484	0	0		0	54.6337	0	0		1.10073	121.08	0.909091	173.936		1.20588	144.706	0.833333	37.1595		0	119.604	0	0		0	59.0635	0	0		0	119.604	0	0		0	79.8611	0	0		0	183.465	0	0
	0	61.0244	0	0		0	92.2808	0	0		0	55.0708	0	0		0	122.049	0	0		0	145.863	0	0		1.88376	120.56	1.5625	235.978		0	59.536	0	0		0	120.56	0	0		0	80.5	0	0		8.40602	184.933	4.54545	950.318
	0	61.5087	0	0		0	93.0132	0	0		0	55.5079	0	0		0	123.017	0	0		0	147.021	0	0		0	121.517	0	0		0	60.0085	0	0		0	121.517	0	0		0	81.1389	0	0		0	186.4	0	0
	0	61.9931	0	0		0	93.7456	0	0		0	55.9449	0	0		0	123.986	0	0		0	148.179	0	0		0	122.474	0	0		0.30546	60.481	0.50505	32.3672		0	122.474	0	0		0	81.7778	0	0		0	187.868	0	0
	0	62.4774	0	0		0	94.478	0	0		0	56.382	0	0		0	124.955	0	0		0	149.336	0	0		0	123.431	0	0		0	60.9535	0	0		0	123.431	0	0		0	82.4167	0	0		0	189.336	0	0
	0	62.9617	0	0		0	95.2104	0	0		0	56.8191	0	0		0	125.923	0	0		1.25412	150.494	0.833333	30.9968		0	124.388	0	0		0	61.426	0	0		0	124.388	0	0		0	83.0556	0	0		0	190.803	0	0
	0	63.446	0	0		0	95.9428	0	0		0	57.2562	0	0		2.30713	126.892	1.81818	319.254		0	151.651	0	0		0	125.345	0	0		0	61.8986	0	0		0	125.345	0	0		0	83.6945	0	0		0	192.271	0	0
	0	63.9303	0	0		1.20844	96.6751	1.25	152.6		0	57.6932	0	0		0	127.861	0	0		0	152.809	0	0		0	126.301	0	0		0	62.3711	0	0		0	126.301	0	0		0	84.3334	0	0		2.93544	193.739	1.51515	279.362
	0	64.4147	0	0		0	97.4075	0	0		0	58.1303	0	0		0	128.829	0	0		0	153.967	0	0		0	127.258	0	0		0	62.8436	0	0		0	127.258	0	0		0	84.9723	0	0		0	195.207	0	0
	0	64.899	0	0		0	98.1399	0	0		0	58.5674	0	0		0	129.798	0	0		0	155.124	0	0		0	128.215	0	0		0	63.3161	0	0		0	128.215	0	0		0	85.6111	0	0		0	196.674	0	0
	0	65.3833	0	0		0	98.8723	0	0		0	59.0044	0	0		0	130.767	0	0		0	156.282	0	0		0	129.172	0	0		0	63.7886	0	0		0	129.172	0	0		0	86.25	0	0		0	198.142	0	0
	0	65.8676	0	0		0	99.6047	0	0		0	59.4415	0	0		0	131.735	0	0		5.24799	157.44	3.33333	97.3538		0	130.129	0	0		0	64.2611	0	0		0	130.129	0	0		0	86.8889	0	0		0	199.61	0	0
	0.592428	66.352	0.892857	71.9698		0	100.337	0	0		0	59.8786	0	0		2.4128	132.704	1.81818	291.863		0	158.597	0	0		0	131.085	0	0		0	64.7336	0	0		0	131.085	0	0		0	87.5278	0	0		0	201.077	0	0
	0	66.8363	0	0		0	101.07	0	0		0.603156	60.3156	1	47.3152		0	133.673	0	0		0	159.755	0	0		0	132.042	0	0		0	65.2061	0	0		0	132.042	0	0		2.645	88.1667	3	146.879		3.06887	202.545	1.51515	244.302
	0	67.3206	0	0		0	101.802	0	0		0	60.7527	0	0		0	134.641	0	0		0	160.913	0	0		0	132.999	0	0		0	65.6786	0	0		0	132.999	0	0		0	88.8056	0	0		0	204.013	0	0
	0	67.8049	0	0		0	102.534	0	0		0	61.1898	0	0		0	135.61	0	0		0	162.07	0	0		0	133.956	0	0		0	66.1511	0	0		0	133.956	0	0		0	89.4445	0	0		0	205.481	0	0
	0	68.2892	0	0		0	103.267	0	0		0	61.6269	0	0		0	136.578	0	0		2.72047	163.228	1.66667	38.8083		0	134.913	0	0		0.336483	66.6236	0.50505	27.5906		0	134.913	0	0		0	90.0834	0	0		0	206.948	0	0
	0	68.7736	0	0		0	103.999	0	0		0	62.0639	0	0		0	137.547	0	0		0	164.386	0	0		0	135.87	0	0		0	67.0961	0	0		0	135.87	0	0		0	90.7223	0	0		0	208.416	0	0
	0	69.2579	0	0		0	104.731	0	0		0	62.501	0	0		0	138.516	0	0		0	165.543	0	0		0	136.827	0	0		0	67.5687	0	0		0	136.827	0	0		0	91.3611	0	0		0	209.884	0	0
	0	69.7422	0	0		0	105.464	0	0		0	62.9381	0	0		0	139.484	0	0		0	166.701	0	0		0	137.783	0	0		0	68.0412	0	0		0	137.783	0	0		0	92	0	0		3.20229	211.351	1.51515	211.591
	0	70.2265	0	0		0	106.196	0	0		0	63.3751	0	0		0	140.453	0	0		0	167.858	0	0		6.50345	138.74	4.6875	513.975		0	68.5137	0	0		0	138.74	0	0		0	92.6389	0	0		0	212.819	0	0
	0	70.7108	0	0		0	106.929	0	0		0	63.8122	0	0		0	141.422	0	0		5.63387	169.016	3.33333	60.1129		0	139.697	0	0		0	68.9862	0	0		0	139.697	0	0		0	93.2778	0	0		0	214.287	0	0
	0	71.1951	0	0		0	107.661	0	0		0	64.2493	0	0		0	142.39	0	0		0	170.174	0	0		0	140.654	0	0		0	69.4587	0	0		0	140.654	0	0		0	93.9167	0	0		0	215.755	0	0
	0	71.6795	0	0		0	108.393	0	0		0	64.6864	0	0		0	143.359	0	0		0	171.331	0	0		0	141.611	0	0		0	69.9312	0	0		0	141.611	0	0		0	94.5556	0	0		0	217.222	0	0
	0	72.1638	0	0		0	109.126	0	0		0	65.1234	0	0		0	144.328	0	0		0	172.489	0	0		0	142.567	0	0		0	70.4037	0	0		0	142.567	0	0		0	95.1945	0	0		0	218.69	0	0
	1.29729	72.6481	1.78571	124.459		0	109.858	0	0		0	65.5605	0	0		5.2835	145.296	3.63636	473.461		0	173.647	0	0		0	143.524	0	0		0	70.8762	0	0		0	143.524	0	0		0	95.8334	0	0		0	220.158	0	0
	0	73.1324	0	0		0	110.591	0	0		0	65.9976	0	0		0	146.265	0	0		1.4567	174.804	0.833333	11.2107		2.25752	144.481	1.5625	153.054		0	71.3487	0	0		0	144.481	0	0		0	96.4723	0	0		0	221.625	0	0
	0	73.6167	0	0		0	111.323	0	0		1.32869	66.4346	2	78.5433		0	147.233	0	0		0	175.962	0	0		0	145.438	0	0		0	71.8212	0	0		0	145.438	0	0		1.94222	97.1111	2	74.4851		0	223.093	0	0
	0	74.1011	0	0		0	112.055	0	0		0	66.8717	0	0		0	148.202	0	0		0	177.12	0	0		0	146.395	0	0		0.36512	72.2937	0.50505	23.5198		0	146.395	0	0		0	97.75	0	0		0	224.561	0	0
	0	74.5854	0	0		0	112.788	0	0		0	67.3088	0	0		0	149.171	0	0		0	178.277	0	0		0	147.352	0	0		0	72.7662	0	0		0	147.352	0	0		0	98.3889	0	0		0	226.029	0	0
	0	75.0697	0	0		0	113.52	0	0		0	67.7458	0	0		0	150.139	0	0		0	179.435	0	0		0	148.309	0	0		0	73.2387	0	0		0	148.309	0	0		0	99.0278	0	0		0	227.496	0	0
	0	75.554	0	0		0	114.252	0	0		0	68.1829	0	0		1.37371	151.108	0.909091	106.615		1.50494	180.593	0.833333	7.9515		0	149.265	0	0		0	73.7113	0	0		0	149.265	0	0		0	99.6667	0	0		10.4075	228.964	4.54545	459.66
	0	76.0384	0	0		2.87462	114.985	2.5	212.43		0	68.62	0	0		0	152.077	0	0		0	181.75	0	0		0	150.222	0	0		0	74.1838	0	0		0	150.222	0	0		0	100.306	0	0		0	230.432	0	0
	0	76.5227	0	0		0	115.717	0	0		0	69.0571	0	0		0	153.045	0	0		0	182.908	0	0		4.72434	151.179	3.125	266.079		0	74.6563	0	0		0	151.179	0	0		0	100.945	0	0		0	231.899	0	0
	0	77.007	0	0		0	116.45	0	0		0	69.4941	0	0		0	154.014	0	0		0	184.065	0	0		0	152.136	0	0		0	75.1288	0	0		0	152.136	0	0		0	101.583	0	0		0	233.367	0	0
	0	77.4913	0	0		0	117.182	0	0		0	69.9312	0	0		0	154.983	0	0		0	185.223	0	0		0	153.093	0	0		0	75.6013	0	0		0	153.093	0	0		0	102.222	0	0		0	234.835	0	0
	0	77.9756	0	0		0	117.914	0	0		0	70.3683	0	0		0	155.951	0	0		0	186.381	0	0		0	154.049	0	0		0	76.0738	0	0		0	154.049	0	0		0	102.861	0	0		0	236.303	0	0
	0.700535	78.46	0.892857	53.8668		0	118.647	0	0		0	70.8053	0	0		1.42654	156.92	0.909091	95.4784		3.12564	187.538	1.66667	9.55526		0	155.006	0	0		0	76.5463	0	0		0	155.006	0	0		0	103.5	0	0		7.20516	237.77	3.0303	255.119
	0	78.9443	0	0		0	119.379	0	0		0	71.2424	0	0		0	157.889	0	0		0	188.696	0	0		0	155.963	0	0		0	77.0188	0	0		0	155.963	0	0		0	104.139	0	0		0	239.238	0	0
	0	79.4286	0	0		0	120.112	0	0		0	71.6795	0	0		0	158.857	0	0		0	189.854	0	0		2.45187	156.92	1.5625	117		0	77.4913	0	0		0	156.92	0	0		0	104.778	0	0		0	240.706	0	0
	0	79.9129	0	0		3.0211	120.844	2.5	186.283		0	72.1166	0	0		0	159.826	0	0		0	191.011	0	0		0	157.877	0	0		0	77.9638	0	0		0	157.877	0	0		0	105.417	0	0		0	242.173	0	0
	0	80.3972	0	0		0	121.576	0	0		0.725536	72.5536	1	31.9769		0	160.794	0	0		0	192.169	0	0		0	158.834	0	0		1.18843	78.4363	1.51515	58.4287		0	158.834	0	0		4.24222	106.056	4	108.502		0	243.641	0	0
	0	80.8816	0	0		0	122.309	0	0		0	72.9907	0	0		0	161.763	0	0		1.61106	193.327	0.833333	2.74691		0	159.79	0	0		0	78.9088	0	0		0	159.79	0	0		0	106.695	0	0		0	245.109	0	0
	0	81.3659	0	0		0	123.041	0	0		0	73.4278	0	0		1.47938	162.732	0.909091	84.9561		0	194.484	0	0		0	160.747	0	0		0	79.3813	0	0		0	160.747	0	0		0	107.333	0	0		0	246.577	0	0
	0	81.8502	0	0		0	123.773	0	0		0	73.8648	0	0		0	163.7	0	0		0	195.642	0	0		0	161.704	0	0		0	79.8539	0	0		0	161.704	0	0		0	107.972	0	0		0	248.044	0	0
	0	82.3345	0	0		0	124.506	0	0		0	74.3019	0	0		0	164.669	0	0		0	196.8	0	0		0	162.661	0	0		0	80.3264	0	0		0	162.661	0	0		0	108.611	0	0		0	249.512	0	0
	0	82.8188	0	0		0	125.238	0	0		0	74.739	0	0		0	165.638	0	0		0	197.957	0	0		0	163.618	0	0		0	80.7989	0	0		0	163.618	0	0		0	109.25	0	0		0	250.98	0	0
	0	83.3032	0	0		0	125.971	0	0		0	75.176	0	0		0	166.606	0	0		4.97787	199.115	2.5	3.82388		0	164.575	0	0		0	81.2714	0	0		0	164.575	0	0		0	109.889	0	0		0	252.447	0	0
	0	83.7875	0	0		4.75136	126.703	3.75	242.78		0	75.6131	0	0		0	167.575	0	0		0	200.273	0	0		0	165.531	0	0		0	81.7439	0	0		0	165.531	0	0		0	110.528	0	0		0	253.915	0	0
	2.25728	84.2718	2.67857	138.322		0	127.435	0	0		0	76.0502	0	0		1.53221	168.544	0.909091	75.0481		0	201.43	0	0		0	166.488	0	0		0	82.2164	0	0		0	166.488	0	0		0	111.167	0	0		7.73888	255.383	3.0303	166.577
	0	84.7561	0	0		0	128.168	0	0		0	76.4872	0	0		0	169.512	0	0		0	202.588	0	0		0	167.445	0	0		0	82.6889	0	0		0	167.445	0	0		0	111.806	0	0		0	256.851	0	0
	0	85.2404	0	0		0	128.9	0	0		0	76.9243	0	0		0	170.481	0	0		0	203.745	0	0		0	168.402	0	0		0	83.1614	0	0		0	168.402	0	0		0	112.445	0	0		0	258.318	0	0
	0	85.7248	0	0		0	129.633	0	0		0	77.3614	0	0		0	171.45	0	0		3.41505	204.903	1.66667	0.721455		2.64623	169.359	1.5625	85.781		0	83.6339	0	0		1.53962	169.359	0.909091	223.258		0	113.083	0	0		0	259.786	0	0
	0	86.2091	0	0		0	130.365	0	0		0	77.7985	0	0		0	172.418	0	0		0	206.061	0	0		0	170.315	0	0		0	84.1064	0	0		0	170.315	0	0		0	113.722	0	0		0	261.254	0	0
	0	86.6934	0	0		0	131.097	0	0		0	78.2355	0	0		0	173.387	0	0		0	207.218	0	0		0	171.272	0	0		0.854333	84.579	1.0101	31.6275		0	171.272	0	0		0	114.361	0	0		0	262.722	0	0
	0	87.1777	0	0		0	131.83	0	0		0.786726	78.6726	1	25.431		0	174.356	0	0		0	208.376	0	0		0	172.229	0	0		0	85.0515	0	0		0	172.229	0	0		5.75	115	5	93.0437		0	264.189	0	0
	0	87.662	0	0		1.65703	132.562	1.25	69.5698		0	79.1097	0	0		1.59386	175.324	0.909091	64.2648		0	209.534	0	0		0	173.186	0	0		0	85.5239	0	0		0	173.186	0	0		0	115.639	0	0		0	265.657	0	0
	0	88.1464	0	0		0	133.294	0	0		0	79.5467	0	0		0	176.293	0	0		0	210.691	0	0		0	174.143	0	0		0	85.9965	0	0		0	174.143	0	0		0	116.278	0	0		0	267.125	0	0
	0	88.6307	0	0		0	134.027	0	0		0	79.9838	0	0		0	177.261	0	0		10.5924	211.849	5	0.00671951		2.73593	175.1	1.5625	73.003		0	86.469	0	0		0	175.1	0	0		0	116.917	0	0		0	268.592	0	0
	0	89.115	0	0		0	134.759	0	0		0	80.4209	0	0		0	178.23	0	0		0	213.007	0	0		0	176.056	0	0		0	86.9415	0	0		0	176.056	0	0		0	117.556	0	0		0	270.06	0	0
	0	89.5993	0	0		0	135.492	0	0		0	80.858	0	0		0	179.199	0	0		0	214.164	0	0		0	177.013	0	0		0	87.414	0	0		0	177.013	0	0		0	118.195	0	0		0	271.528	0	0
	0	90.0837	0	0		0	136.224	0	0		0	81.295	0	0		0	180.167	0	0		0	215.322	0	0		0	177.97	0	0		0	87.8865	0	0		0	177.97	0	0		0	118.833	0	0		4.1363	272.996	1.51515	48.4178
	0	90.568	0	0		0	136.957	0	0		0	81.7321	0	0		4.94007	181.136	2.72727	167.062		0	216.48	0	0		0	178.927	0	0		0	88.359	0	0		0	178.927	0	0		0	119.472	0	0		0	274.463	0	0
	0	91.0523	0	0		0	137.689	0	0		0	82.1692	0	0		0	182.105	0	0		3.62729	217.637	1.66667	0.631358		0	179.884	0	0		0	88.8315	0	0		0	179.884	0	0		0	120.111	0	0		0	275.931	0	0
	0	91.5366	0	0		0	138.421	0	0		0	82.6062	0	0		0	183.073	0	0		0	218.795	0	0		0	180.841	0	0		0	89.304	0	0		0	180.841	0	0		0	120.75	0	0		0	277.399	0	0
	0	92.0209	0	0		1.73942	139.154	1.25	57.8193		0	83.0433	0	0		0	184.042	0	0		0	219.952	0	0		0	181.798	0	0		0	89.7765	0	0		0	181.798	0	0		0	121.389	0	0		0	278.866	0	0
	0	92.5053	0	0		0	139.886	0	0		0	83.4804	0	0		0	185.011	0	0		0	221.11	0	0		0	182.754	0	0		0	90.249	0	0		0	182.754	0	0		0	122.028	0	0		0	280.334	0	0
	0	92.9896	0	0		0	140.618	0	0		0	83.9174	0	0		0	185.979	0	0		0	222.268	0	0		0	183.711	0	0		0.916379	90.7215	1.0101	25.0648		0	183.711	0	0		0	122.667	0	0		4.26973	281.802	1.51515	34.5075
	0	93.4739	0	0		0	141.351	0	0		1.68709	84.3545	2	40.0463		5.09858	186.948	2.72727	143.172		7.44751	223.425	3.33333	4.7545		0	184.668	0	0		0	91.1941	0	0		0	184.668	0	0		2.46611	123.306	2	24.2657		0	283.27	0	0
	0	93.9582	0	0		0	142.083	0	0		0	84.7916	0	0		0	187.917	0	0		0	224.583	0	0		0	185.625	0	0		0	91.6666	0	0		0	185.625	0	0		0	123.945	0	0		0	284.737	0	0
	0	94.4425	0	0		0	142.816	0	0		0	85.2286	0	0		0	188.885	0	0		0	225.741	0	0		0	186.582	0	0		0	92.1391	0	0		0	186.582	0	0		0	124.583	0	0		0	286.205	0	0
	0	94.9269	0	0		0	143.548	0	0		0	85.6657	0	0		0	189.854	0	0		0	226.898	0	0		0	187.538	0	0		0	92.6116	0	0		0	187.538	0	0		0	125.222	0	0		0	287.673	0	0
	0	95.4112	0	0		0	144.28	0	0		0	86.1028	0	0		0	190.822	0	0		0	228.056	0	0		0	188.495	0	0		0	93.0841	0	0		0	188.495	0	0		0	125.861	0	0		0	289.14	0	0
	0	95.8955	0	0		0	145.013	0	0		0	86.5399	0	0		0	191.791	0	0		3.82023	229.214	1.66667	5.23998		0	189.452	0	0		0	93.5566	0	0		0	189.452	0	0		0	126.5	0	0		4.40316	290.608	1.51515	22.9473
	2.5816	96.3798	2.67857	95.6365		0	145.745	0	0		0	86.9769	0	0		1.75236	192.76	0.909091	40.3748		0	230.371	0	0		0	190.409	0	0		0	94.0291	0	0		0	190.409	0	0		0	127.139	0	0		0	292.076	0	0
	0	96.8641	0	0		0	146.477	0	0		0	87.414	0	0		0	193.728	0	0		0	231.529	0	0		0	191.366	0	0		0	94.5016	0	0		0	191.366	0	0		0	127.778	0	0		0	293.544	0	0
	0	97.3485	0	0		0	147.21	0	0		0	87.8511	0	0		0	194.697	0	0		0	232.687	0	0		0	192.323	0	0		0	94.9741	0	0		0	192.323	0	0		0	128.417	0	0		0	295.011	0	0
	0	97.8328	0	0		0	147.942	0	0		0	88.2881	0	0		0	195.666	0	0		0	233.844	0	0		0	193.279	0	0		0	95.4466	0	0		0	193.279	0	0		0	129.056	0	0		0	296.479	0	0
	0	98.3171	0	0		0	148.675	0	0		0	88.7252	0	0		0	196.634	0	0		1.95835	235.002	0.833333	4.60972		0	194.236	0	0		0	95.9191	0	0		0	194.236	0	0		0	129.695	0	0		0	297.947	0	0
	0	98.8014	0	0		0	149.407	0	0		0	89.1623	0	0		0	197.603	0	0		0	236.16	0	0		0	195.193	0	0		4.38144	96.3916	4.54545	88.5759		0	195.193	0	0		0	130.333	0	0		0	299.414	0	0
	0	99.2857	0	0		0	150.139	0	0		0	89.5993	0	0		0	198.571	0	0		0	237.317	0	0		0	196.15	0	0		0	96.8641	0	0		0	196.15	0	0		0	130.972	0	0		0	300.882	0	0
	0	99.7701	0	0		3.7718	150.872	2.5	79.223		0	90.0364	0	0		1.814	199.54	0.909091	32.5769		0	238.475	0	0		0	197.107	0	0		0	97.3367	0	0		0	197.107	0	0		0	131.611	0	0		0	302.35	0	0
	0	100.254	0	0		0	151.604	0	0		0.904735	90.4735	1	14.9214		0	200.509	0	0		0	239.632	0	0		0	198.064	0	0		0	97.8092	0	0		0	198.064	0	0		7.935	132.25	6	40.2108		0	303.818	0	0
	0	100.739	0	0		0	152.337	0	0		0	90.9106	0	0		0	201.477	0	0		0	240.79	0	0		3.10969	199.02	1.5625	30.8479		0	98.2817	0	0		0	199.02	0	0		0	132.889	0	0		0	305.285	0	0
	0	101.223	0	0		0	153.069	0	0		0	91.3476	0	0		0	202.446	0	0		8.06493	241.948	3.33333	30.938		0	199.977	0	0		0	98.7542	0	0		0	199.977	0	0		0	133.528	0	0		0	306.753	0	0
	0	101.707	0	0		0	153.801	0	0		0	91.7847	0	0		0	203.415	0	0		0	243.105	0	0		0	200.934	0	0		0	99.2267	0	0		0	200.934	0	0		0	134.167	0	0		0	308.221	0	0
	0	102.192	0	0		0	154.534	0	0		0	92.2218	0	0		0	204.383	0	0		0	244.263	0	0		0	201.891	0	0		0	99.6992	0	0		0	201.891	0	0		0	134.806	0	0		0	309.688	0	0
	1.8335	102.676	1.78571	51.0293		0	155.266	0	0		0	92.6588	0	0		5.60051	205.352	2.72727	79.6753		0	245.421	0	0		0	202.848	0	0		0	100.172	0	0		0	202.848	0	0		0	135.445	0	0		0	311.156	0	0
	0	103.16	0	0		0	155.999	0	0		0	93.0959	0	0		0	206.321	0	0		0	246.578	0	0		0	203.804	0	0		0	100.644	0	0		0	203.804	0	0		0	136.083	0	0		0	312.624	0	0
	0	103.645	0	0		5.87741	156.731	3.75	95.3848		0	93.533	0	0		0	207.289	0	0		4.12893	247.736	1.66667	21.9054		0	204.761	0	0		0	101.117	0	0		0	204.761	0	0		0	136.722	0	0		0	314.092	0	0
	0	104.129	0	0		0	157.463	0	0		0	93.97	0	0		0	208.258	0	0		0	248.894	0	0		0	205.718	0	0		0	101.589	0	0		0	205.718	0	0		0	137.361	0	0		0	315.559	0	0
	0	104.613	0	0		0	158.196	0	0		0	94.4071	0	0		0	209.227	0	0		0	250.051	0	0		0	206.675	0	0		0	102.062	0	0		0	206.675	0	0		0	138	0	0		4.80344	317.027	1.51515	2.36664
	0	105.098	0	0		0	158.928	0	0		0	94.8442	0	0		0	210.195	0	0		0	251.209	0	0		0	207.632	0	0		2.0714	102.534	2.0202	29.1734		0	207.632	0	0		0	138.639	0	0		0	318.495	0	0
	0	105.582	0	0		0	159.661	0	0		0	95.2812	0	0		1.91967	211.164	0.909091	21.154		0	252.367	0	0		0	208.589	0	0		0	103.007	0	0		0	208.589	0	0		0	139.278	0	0		0	319.963	0	0
	0	106.066	0	0		0	160.393	0	0		0	95.7183	0	0		0	212.132	0	0		4.2254	253.524	1.66667	29.4585		0	209.546	0	0		0	103.479	0	0		0	209.546	0	0		0	139.917	0	0		0	321.43	0	0
	0	106.551	0	0		0	161.125	0	0		0	96.1554	0	0		0	213.101	0	0		0	254.682	0	0		0	210.502	0	0		0	103.952	0	0		0	210.502	0	0		0	140.556	0	0		0	322.898	0	0
	0	107.035	0	0		0	161.858	0	0		7.7274	96.5924	8	84.5482		0	214.07	0	0		0	255.839	0	0		0	211.459	0	0		0	104.424	0	0		0	211.459	0	0		2.82389	141.195	2	5.74154		0	324.366	0	0
	0	107.519	0	0		0	162.59	0	0		0	97.0295	0	0		0	215.038	0	0		0	256.997	0	0		0	212.416	0	0		0	104.897	0	0		0	212.416	0	0		0	141.833	0	0		9.87374	325.833	3.0303	0.41297
	0	108.004	0	0		2.04153	163.322	1.25	24.0271		0	97.4666	0	0		0	216.007	0	0		0	258.155	0	0		0	213.373	0	0		0	105.369	0	0		0	213.373	0	0		0	142.472	0	0		0	327.301	0	0
	4.84321	108.488	4.46429	101.341		0	164.055	0	0		0	97.9037	0	0		3.94501	216.976	1.81818	32.7274		4.32187	259.312	1.66667	38.1285		0	214.33	0	0		0	105.842	0	0		0	214.33	0	0		0	143.111	0	0		0	328.769	0	0
	0	108.972	0	0		0	164.787	0	0		0	98.3407	0	0		0	217.944	0	0		0	260.47	0	0		0	215.286	0	0		0	106.314	0	0		0	215.286	0	0		0	143.75	0	0		0	330.237	0	0
	0	109.457	0	0		0	165.52	0	0		0	98.7778	0	0		0	218.913	0	0		0	261.628	0	0		0	216.243	0	0		0	106.787	0	0		0	216.243	0	0		0	144.389	0	0		0	331.704	0	0
	0	109.941	0	0		0	166.252	0	0		0	99.2149	0	0		0	219.882	0	0		0	262.785	0	0		0	217.2	0	0		0	107.259	0	0		0	217.2	0	0		0	145.028	0	0		0	333.172	0	0
	0	110.425	0	0		0	166.984	0	0		0	99.6519	0	0		0	220.85	0	0		0	263.943	0	0		0	218.157	0	0		0	107.732	0	0		0	218.157	0	0		0	145.667	0	0		5.0703	334.64	1.51515	0.396364
	0	110.909	0	0		0	167.717	0	0		0	100.089	0	0		0	221.819	0	0		6.62751	265.101	2.5	71.8728		0	219.114	0	0		0	108.204	0	0		0	219.114	0	0		0	146.306	0	0		0	336.108	0	0
	0	111.394	0	0		0	168.449	0	0		0	100.526	0	0		0	222.787	0	0		0	266.258	0	0		0	220.071	0	0		3.29324	108.677	3.0303	30.7564		0	220.071	0	0		0	146.945	0	0		0	337.575	0	0
	0	111.878	0	0		6.34431	169.181	3.75	54.1029		0	100.963	0	0		6.10244	223.756	2.72727	34.6538		0	267.416	0	0		0	221.027	0	0		0	109.149	0	0		0	221.027	0	0		0	147.583	0	0		0	339.043	0	0
	0	112.362	0	0		0	169.914	0	0		0	101.4	0	0		0	224.725	0	0		0	268.574	0	0		0	221.984	0	0		0	109.622	0	0		0	221.984	0	0		0	148.222	0	0		0	340.511	0	0
	0	112.847	0	0		0	170.646	0	0		0	101.837	0	0		0	225.694	0	0		0	269.731	0	0		0	222.941	0	0		0	110.094	0	0		4.05347	222.941	1.81818	193.374		0	148.861	0	0		0	341.978	0	0
	0	113.331	0	0		0	171.379	0	0		0	102.274	0	0		0	226.662	0	0		0	270.889	0	0		0	223.898	0	0		0	110.567	0	0		0	223.898	0	0		0	149.5	0	0		5.20373	343.446	1.51515	2.93631
	0	113.815	0	0		0	172.111	0	0		5.13557	102.711	5	34.8224		0	227.631	0	0		11.3353	272.046	4.16667	152.834		0	224.855	0	0		0	111.039	0	0		0	224.855	0	0		9.00834	150.139	6	3.83889		0	344.914	0	0
	0	114.3	0	0		0	172.843	0	0		0	103.148	0	0		0	228.599	0	0		0	273.204	0	0		0	225.812	0	0		0	111.512	0	0		0	225.812	0	0		0	150.778	0	0		0	346.382	0	0
	5.12429	114.784	4.46429	76.3273		0	173.576	0	0		0	103.586	0	0		2.08698	229.568	0.909091	8.09164		0	274.362	0	0		0	226.768	0	0		0	111.984	0	0		0	226.768	0	0		0	151.417	0	0		0	347.849	0	0
	0	115.268	0	0		0	174.308	0	0		0	104.023	0	0		0	230.537	0	0		0	275.519	0	0		0	227.725	0	0		0	112.457	0	0		0	227.725	0	0		0	152.056	0	0		0	349.317	0	0
	0	115.753	0	0		2.18801	175.041	1.25	12.8997		0	104.46	0	0		0	231.505	0	0		0	276.677	0	0		0	228.682	0	0		0	112.929	0	0		0	228.682	0	0		0	152.695	0	0		0	350.785	0	0
	0	116.237	0	0		0	175.773	0	0		0	104.897	0	0		0	232.474	0	0		6.94587	277.835	2.5	110.066		0	229.639	0	0		0	113.402	0	0		2.08763	229.639	0.909091	84.5357		0	153.333	0	0		0	352.252	0	0
	0	116.721	0	0		0	176.505	0	0		0	105.334	0	0		0	233.443	0	0		0	278.992	0	0		0	230.596	0	0		0	113.874	0	0		0	230.596	0	0		0	153.972	0	0		0	353.72	0	0
	0	117.206	0	0		0	177.238	0	0		0	105.771	0	0		0	234.411	0	0		0	280.15	0	0		0	231.553	0	0		0	114.347	0	0		0	231.553	0	0		0	154.611	0	0		0	355.188	0	0
	0	117.69	0	0		0	177.97	0	0		0	106.208	0	0		2.13982	235.38	0.909091	5.24611		0	281.308	0	0		0	232.509	0	0		3.47938	114.82	3.0303	20.0396		0	232.509	0	0		0	155.25	0	0		0	356.656	0	0
	0	118.174	0	0		0	178.702	0	0		0	106.645	0	0		0	236.349	0	0		0	282.465	0	0		0	233.466	0	0		0	115.292	0	0		0	233.466	0	0		0	155.889	0	0		0	358.123	0	0
	0	118.659	0	0		0	179.435	0	0		0	107.082	0	0		0	237.317	0	0		2.36353	283.623	0.833333	43.3689		0	234.423	0	0		0	115.764	0	0		0	234.423	0	0		0	156.528	0	0		0	359.591	0	0
	0	119.143	0	0		0	180.167	0	0		0	107.519	0	0		0	238.286	0	0		0	284.781	0	0		0	235.38	0	0		0	116.237	0	0		4.27963	235.38	1.81818	149.539		0	157.167	0	0		10.9412	361.059	3.0303	30.1325
	0	119.627	0	0		4.52249	180.9	2.5	17.2466		0	107.956	0	0		0	239.255	0	0		0	285.938	0	0		0	236.337	0	0		0	116.71	0	0		0	236.337	0	0		0	157.806	0	0		0	362.526	0	0
	0	120.112	0	0		0	181.632	0	0		0	108.393	0	0		0	240.223	0	0		0	287.096	0	0		0	237.293	0	0		0	117.182	0	0		0	237.293	0	0		0	158.445	0	0		0	363.994	0	0
	4.307	120.596	3.57143	45.1028		0	182.364	0	0		1.0883	108.83	1	4.10926		6.57796	241.192	2.72727	9.04426		0	288.253	0	0		0	238.25	0	0		0	117.654	0	0		0	238.25	0	0		6.36334	159.083	4	0.0357632		0	365.462	0	0
	0	121.08	0	0		0	183.097	0	0		0	109.267	0	0		0	242.16	0	0		4.82352	289.411	1.66667	101.215		0	239.207	0	0		0	118.127	0	0		0	239.207	0	0		0	159.722	0	0		0	366.93	0	0
	0	121.564	0	0		0	183.829	0	0		0	109.705	0	0		0	243.129	0	0		0	290.569	0	0		0	240.164	0	0		0	118.6	0	0		0	240.164	0	0		0	160.361	0	0		0	368.397	0	0
	0	122.049	0	0		0	184.562	0	0		0	110.142	0	0		0	244.098	0	0		0	291.726	0	0		3.76751	241.121	1.5625	0.0849956		0	119.072	0	0		2.19201	241.121	0.909091	65.6031		0	161	0	0		11.208	369.865	3.0303	49.3126
	0	122.533	0	0		0	185.294	0	0		0	110.579	0	0		0	245.066	0	0		0	292.884	0	0		0	242.078	0	0		0	119.544	0	0		0	242.078	0	0		0	161.639	0	0		0	371.333	0	0
	0	123.017	0	0		0	186.026	0	0		0	111.016	0	0		0	246.035	0	0		0	294.042	0	0		0	243.035	0	0		0	120.017	0	0		0	243.035	0	0		0	162.278	0	0		0	372.8	0	0
	0	123.502	0	0		0	186.759	0	0		0	111.453	0	0		0	247.004	0	0		0	295.199	0	0		0	243.991	0	0		0	120.49	0	0		0	243.991	0	0		0	162.917	0	0		0	374.268	0	0
	0	123.986	0	0		7.03092	187.491	3.75	14.5146		0	111.89	0	0		4.50859	247.972	1.81818	2.37537		7.40893	296.357	2.5	180.093		0	244.948	0	0		6.1092	120.962	5.05051	19.3491		0	244.948	0	0		0	163.556	0	0		0	375.736	0	0
	0	124.47	0	0		0	188.224	0	0		0	112.327	0	0		0	248.941	0	0		0	297.515	0	0		0	245.905	0	0		0	121.435	0	0		0	245.905	0	0		0	164.195	0	0		0	377.204	0	0
	0	124.955	0	0		0	188.956	0	0		0	112.764	0	0		0	249.91	0	0		0	298.672	0	0		0	246.862	0	0		0	121.907	0	0		0	246.862	0	0		0	164.833	0	0		0	378.671	0	0
	0	125.439	0	0		0	189.688	0	0		0	113.201	0	0		0	250.878	0	0		0	299.83	0	0		0	247.819	0	0		0	122.38	0	0		2.2529	247.819	0.909091	55.666		0	165.472	0	0		28.7984	380.139	7.57576	194.074
	0	125.923	0	0		0	190.421	0	0		0	113.638	0	0		0	251.847	0	0		0	300.988	0	0		0	248.775	0	0		0	122.852	0	0		0	248.775	0	0		0	166.111	0	0		0	381.607	0	0
	0	126.408	0	0		0	191.153	0	0		0	114.075	0	0		0	252.815	0	0		12.5894	302.145	4.16667	342.49		0	249.732	0	0		0	123.325	0	0		0	249.732	0	0		0	166.75	0	0		0	383.074	0	0
	6.79779	126.892	5.35714	45.8052		0	191.886	0	0		6.87074	114.512	6	12.7711		9.22851	253.784	3.63636	1.14775		0	303.303	0	0		0	250.689	0	0		0	123.797	0	0		0	250.689	0	0		10.0433	167.389	6	5.13504		0	384.542	0	0
	0	127.376	0	0		0	192.618	0	0		0	114.949	0	0		0	254.753	0	0		0	304.461	0	0		0	251.646	0	0		0	124.27	0	0		0	251.646	0	0		0	168.028	0	0		0	386.01	0	0
	0	127.861	0	0		7.25064	193.35	3.75	7.15667		0	115.386	0	0		0	255.721	0	0		0	305.618	0	0		0	252.603	0	0		0	124.742	0	0		0	252.603	0	0		0	168.667	0	0		0	387.478	0	0
	0	128.345	0	0		0	194.083	0	0		0	115.823	0	0		0	256.69	0	0		0	306.776	0	0		3.96187	253.56	1.5625	1.59595		0	125.215	0	0		2.30509	253.56	0.909091	47.7976		0	169.306	0	0		5.89311	388.945	1.51515	53.4965
	0	128.829	0	0		0	194.815	0	0		0	116.261	0	0		0	257.659	0	0		10.2644	307.933	3.33333	310.094		0	254.517	0	0		0	125.687	0	0		0	254.517	0	0		0	169.945	0	0		0	390.413	0	0
	0	129.314	0	0		0	195.548	0	0		0	116.698	0	0		0	258.627	0	0		0	309.091	0	0		0	255.473	0	0		0	126.16	0	0		0	255.473	0	0		0	170.583	0	0		0	391.881	0	0
	0	129.798	0	0		0	196.28	0	0		0	117.135	0	0		2.35996	259.596	0.909091	0.000341033		0	310.249	0	0		0	256.43	0	0		8.95379	126.632	7.07071	13.6676		0	256.43	0	0		0	171.222	0	0		0	393.349	0	0
	0	130.282	0	0		0	197.012	0	0		0	117.572	0	0		0	260.565	0	0		0	311.406	0	0		0	257.387	0	0		0	127.105	0	0		0	257.387	0	0		0	171.861	0	0		0	394.816	0	0
	0	130.767	0	0		0	197.745	0	0		0	118.009	0	0		0	261.533	0	0		0	312.564	0	0		0	258.344	0	0		0	127.577	0	0		0	258.344	0	0		0	172.5	0	0		0	396.284	0	0
	0	131.251	0	0		0	198.477	0	0		0	118.446	0	0		0	262.502	0	0		5.2287	313.722	1.66667	174.215		4.05157	259.301	1.5625	3.9241		0	128.05	0	0		0	259.301	0	0		0	173.139	0	0		0	397.752	0	0
	0	131.735	0	0		9.96047	199.209	5	3.16454		0	118.883	0	0		0	263.471	0	0		0	314.879	0	0		0	260.257	0	0		0	128.522	0	0		0	260.257	0	0		0	173.778	0	0		0	399.219	0	0
	0	132.22	0	0		0	199.942	0	0		0	119.32	0	0		0	264.439	0	0		0	316.037	0	0		0	261.214	0	0		0	128.995	0	0		0	261.214	0	0		0	174.417	0	0		0	400.687	0	0
	9.47885	132.704	7.14286	39.2085		0	200.674	0	0		0	119.757	0	0		7.2384	265.408	2.72727	0.983647		0	317.195	0	0		0	262.171	0	0		0	129.467	0	0		0	262.171	0	0		0	175.056	0	0		0	402.155	0	0
	0	133.188	0	0		0	201.406	0	0		0	120.194	0	0		0	266.376	0	0		0	318.352	0	0		0	263.128	0	0		0	129.94	0	0		0	263.128	0	0		0	175.695	0	0		0	403.623	0	0
	0	133.673	0	0		0	202.139	0	0		10.8568	120.631	9	6.45732		0	267.345	0	0		0	319.51	0	0		0	264.085	0	0		0	130.412	0	0		0	264.085	0	0		3.52667	176.333	2	6.62157		0	405.09	0	0
	0	134.157	0	0		0	202.871	0	0		0	121.068	0	0		0	268.314	0	0		0	320.668	0	0		0	265.042	0	0		0	130.885	0	0		0	265.042	0	0		0	176.972	0	0		18.4799	406.558	4.54545	269.73
	0	134.641	0	0		0	203.604	0	0		0	121.505	0	0		0	269.282	0	0		0	321.825	0	0		4.15623	265.998	1.5625	7.94203		0	131.357	0	0		9.67267	265.998	3.63636	131.221		0	177.611	0	0		0	408.026	0	0
	0	135.125	0	0		0	204.336	0	0		0	121.942	0	0		0	270.251	0	0		0	322.983	0	0		0	266.955	0	0		0	131.83	0	0		0	266.955	0	0		0	178.25	0	0		0	409.493	0	0
	0	135.61	0	0		10.2534	205.069	5	0.219756		0	122.38	0	0		7.3969	271.22	2.72727	3.80865		0	324.14	0	0		0	267.912	0	0		0	132.302	0	0		0	267.912	0	0		0	178.889	0	0		0	410.961	0	0
	0	136.094	0	0		0	205.801	0	0		0	122.817	0	0		0	272.188	0	0		0	325.298	0	0		0	268.869	0	0		8.04696	132.775	6.06061	3.65009		0	268.869	0	0		0	179.528	0	0		0	412.429	0	0
	0	136.578	0	0		0	206.533	0	0		0	123.254	0	0		0	273.157	0	0		5.44093	326.456	1.66667	220.315		0	269.826	0	0		0	133.247	0	0		0	269.826	0	0		0	180.167	0	0		0	413.897	0	0
	0	137.063	0	0		0	207.266	0	0		0	123.691	0	0		0	274.126	0	0		0	327.613	0	0		0	270.783	0	0		0	133.72	0	0		0	270.783	0	0		0	180.806	0	0		12.5868	415.364	3.0303	223.284
	0	137.547	0	0		0	207.998	0	0		0	124.128	0	0		0	275.094	0	0		0	328.771	0	0		4.24593	271.739	1.5625	12.5018		0	134.192	0	0		14.8221	271.739	5.45455	161.007		0	181.445	0	0		0	416.832	0	0
	0	138.031	0	0		0	208.73	0	0		0	124.565	0	0		0	276.063	0	0		0	329.929	0	0		0	272.696	0	0		0	134.665	0	0		0	272.696	0	0		0	182.083	0	0		0	418.3	0	0
	0	138.516	0	0		0	209.463	0	0		0	125.002	0	0		0	277.031	0	0		0	331.086	0	0		0	273.653	0	0		0	135.137	0	0		0	273.653	0	0		0	182.722	0	0		0	419.767	0	0
	4.96429	139	3.57143	10.4833		0	210.195	0	0		0	125.439	0	0		10.1091	278	3.63636	12.5775		2.7687	332.244	0.833333	121.528		0	274.61	0	0		0	135.61	0	0		0	274.61	0	0		0	183.361	0	0		0	421.235	0	0
	0	139.484	0	0		21.0928	210.928	10	1.41575		0	125.876	0	0		0	278.969	0	0		0	333.402	0	0		0	275.567	0	0		0	136.082	0	0		0	275.567	0	0		0	184	0	0		0	422.703	0	0
	0	139.969	0	0		0	211.66	0	0		0	126.313	0	0		0	279.937	0	0		0	334.559	0	0		0	276.524	0	0		0	136.555	0	0		0	276.524	0	0		0	184.639	0	0		6.42683	424.171	1.51515	135.724
	0	140.453	0	0		0	212.392	0	0		10.14	126.75	8	0.442333		0	280.906	0	0		0	335.717	0	0		8.67126	277.48	3.125	36.1828		0	137.027	0	0		10.0902	277.48	3.63636	85.8526		9.26389	185.278	5	36.8289		0	425.638	0	0
	0	140.937	0	0		0	213.125	0	0		0	127.187	0	0		0	281.875	0	0		0	336.875	0	0		0	278.437	0	0		0	137.5	0	0		0	278.437	0	0		0	185.917	0	0		0	427.106	0	0
	0	141.422	0	0		0	213.857	0	0		0	127.624	0	0		0	282.843	0	0		2.81694	338.032	0.833333	133.457		0	279.394	0	0		0	137.972	0	0		0	279.394	0	0		0	186.556	0	0		0	428.574	0	0
	0	141.906	0	0		0	214.589	0	0		0	128.061	0	0		2.58011	283.812	0.909091	5.41666		0	339.19	0	0		0	280.351	0	0		0	138.445	0	0		0	280.351	0	0		0	187.195	0	0		0	430.041	0	0
	0	142.39	0	0		0	215.322	0	0		0	128.499	0	0		0	284.781	0	0		0	340.348	0	0		0	281.308	0	0		15.4353	138.917	11.1111	0.290871		0	281.308	0	0		0	187.833	0	0		0	431.509	0	0
	0	142.875	0	0		0	216.054	0	0		0	128.936	0	0		0	285.749	0	0		0	341.505	0	0		0	282.264	0	0		0	139.39	0	0		0	282.264	0	0		0	188.472	0	0		13.1205	432.977	3.0303	324.311
	0	143.359	0	0		0	216.787	0	0		0	129.373	0	0		0	286.718	0	0		0	342.663	0	0		0	283.221	0	0		0	139.862	0	0		0	283.221	0	0		0	189.111	0	0		0	434.445	0	0
	0	143.843	0	0		5.43798	217.519	2.5	2.68021		0	129.81	0	0		0	287.687	0	0		2.86517	343.82	0.833333	145.945		4.44028	284.178	1.5625	25.9144		0	140.335	0	0		5.16688	284.178	1.81818	31.9076		0	189.75	0	0		0	435.912	0	0
	0	144.328	0	0		0	218.251	0	0		0	130.247	0	0		0	288.655	0	0		0	344.978	0	0		0	285.135	0	0		0	140.807	0	0		0	285.135	0	0		0	190.389	0	0		0	437.38	0	0
	6.46482	144.812	4.46429	5.72166		0	218.984	0	0		0	130.684	0	0		7.89883	289.624	2.72727	24.9094		0	346.136	0	0		0	286.092	0	0		0	141.28	0	0		0	286.092	0	0		0	191.028	0	0		0	438.848	0	0
	0	145.296	0	0		0	219.716	0	0		0	131.121	0	0		0	290.592	0	0		0	347.293	0	0		0	287.049	0	0		0	141.752	0	0		0	287.049	0	0		0	191.667	0	0		0	440.315	0	0
	0	145.78	0	0		0	220.449	0	0		0	131.558	0	0		0	291.561	0	0		0	348.451	0	0		0	288.005	0	0		0	142.225	0	0		0	288.005	0	0		0	192.306	0	0		13.3874	441.783	3.0303	381.876
	0	146.265	0	0		0	221.181	0	0		0	131.995	0	0		0	292.53	0	0		2.91341	349.609	0.833333	158.991		0	288.962	0	0		0	142.697	0	0		0	288.962	0	0		0	192.945	0	0		0	443.251	0	0
	0	146.749	0	0		0	221.913	0	0		0	132.432	0	0		0	293.498	0	0		0	350.766	0	0		9.05997	289.919	3.125	67.4715		0	143.17	0	0		15.8138	289.919	5.45455	71.2842		0	193.583	0	0		0	444.719	0	0
	0	147.233	0	0		0	222.646	0	0		5.31477	132.869	4	0.567787		0	294.467	0	0		0	351.924	0	0		0	290.876	0	0		0	143.643	0	0		0	290.876	0	0		13.5956	194.222	7	91.1462		0	446.186	0	0
	0	147.718	0	0		2.79223	223.378	1.25	3.28587		0	133.306	0	0		8.05734	295.436	2.72727	35.4112		0	353.082	0	0		0	291.833	0	0		0	144.115	0	0		0	291.833	0	0		0	194.861	0	0		0	447.654	0	0
	0	148.202	0	0		0	224.111	0	0		0	133.743	0	0		0	296.404	0	0		0	354.239	0	0		0	292.79	0	0		0	144.588	0	0		0	292.79	0	0		0	195.5	0	0		0	449.122	0	0
	0	148.686	0	0		0	224.843	0	0		0	134.18	0	0		0	297.373	0	0		0	355.397	0	0		0	293.746	0	0		8.79152	145.06	6.06061	1.24074		0	293.746	0	0		0	196.139	0	0		6.82712	450.589	1.51515	222.07
	0	149.171	0	0		0	225.575	0	0		0	134.618	0	0		0	298.342	0	0		11.8852	356.555	3.33333	701.531		0	294.703	0	0		0	145.532	0	0		0	294.703	0	0		0	196.778	0	0		0	452.057	0	0
	0	149.655	0	0		0	226.308	0	0		0	135.055	0	0		0	299.31	0	0		0	357.712	0	0		4.61969	295.66	1.5625	42.587		0	146.005	0	0		10.7513	295.66	3.63636	33.6274		0	197.417	0	0		0	453.525	0	0
	0	150.139	0	0		0	227.04	0	0		0	135.492	0	0		0	300.279	0	0		0	358.87	0	0		0	296.617	0	0		0	146.477	0	0		0	296.617	0	0		0	198.056	0	0		0	454.993	0	0
	0	150.624	0	0		0	227.773	0	0		0	135.929	0	0		0	301.248	0	0		0	360.027	0	0		0	297.574	0	0		0	146.95	0	0		0	297.574	0	0		0	198.695	0	0		0	456.46	0	0
	2.69836	151.108	1.78571	0.450869		0	228.505	0	0		0	136.366	0	0		10.9897	302.216	3.63636	66.6559		0	361.185	0	0		0	298.531	0	0		0	147.423	0	0		0	298.531	0	0		0	199.333	0	0		0	457.928	0	0
	0	151.592	0	0		5.73093	229.237	2.5	12.1797		0	136.803	0	0		0	303.185	0	0		0	362.343	0	0		0	299.487	0	0		0	147.895	0	0		0	299.487	0	0		0	199.972	0	0		0	459.396	0	0
	0	152.077	0	0		0	229.97	0	0		0	137.24	0	0		0	304.153	0	0		0	363.5	0	0		0	300.444	0	0		0	148.368	0	0		0	300.444	0	0		0	200.611	0	0		0	460.863	0	0
	0	152.561	0	0		0	230.702	0	0		0	137.677	0	0		0	305.122	0	0		0	364.658	0	0		0	301.401	0	0		0	148.84	0	0		10.96	301.401	3.63636	22.129		0	201.25	0	0		0	462.331	0	0
	0	153.045	0	0		0	231.434	0	0		0	138.114	0	0		0	306.091	0	0		0	365.816	0	0		0	302.358	0	0		0	149.312	0	0		0	302.358	0	0		0	201.889	0	0		0	463.799	0	0
	0	153.53	0	0		0	232.167	0	0		0	138.551	0	0		0	307.059	0	0		0	366.973	0	0		0	303.315	0	0		0	149.785	0	0		0	303.315	0	0		0	202.528	0	0		0	465.267	0	0
	0	154.014	0	0		0	232.899	0	0		5.55953	138.988	4	3.9097		11.201	308.028	3.63636	85.9806		3.06776	368.131	0.833333	204.49		0	304.272	0	0		0	150.258	0	0		0	304.272	0	0		18.285	203.167	9	182.485		0	466.734	0	0
	0	154.498	0	0		0	233.632	0	0		0	139.425	0	0		0	308.997	0	0		0	369.289	0	0		0	305.228	0	0		13.7027	150.73	9.09091	9.4484		0	305.228	0	0		0	203.806	0	0		0	468.202	0	0
	0	154.983	0	0		0	234.364	0	0		0	139.862	0	0		0	309.965	0	0		0	370.446	0	0		0	306.185	0	0		0	151.203	0	0		0	306.185	0	0		0	204.445	0	0		0	469.67	0	0
	0	155.467	0	0		5.87741	235.096	2.5	19.5041		0	140.299	0	0		0	310.934	0	0		0	371.604	0	0		0	307.142	0	0		0	151.675	0	0		0	307.142	0	0		0	205.083	0	0		0	471.137	0	0
	0	155.951	0	0		0	235.829	0	0		0	140.737	0	0		0	311.903	0	0		0	372.762	0	0		0	308.099	0	0		0	152.148	0	0		11.2036	308.099	3.63636	11.7438		0	205.722	0	0		0	472.605	0	0
	0	156.436	0	0		0	236.561	0	0		0	141.174	0	0		0	312.871	0	0		0	373.919	0	0		0	309.056	0	0		0	152.62	0	0		0	309.056	0	0		0	206.361	0	0		0	474.073	0	0
	2.80214	156.92	1.78571	0.01106		0	237.293	0	0		0	141.611	0	0		2.85309	313.84	0.909091	26.9405		0	375.077	0	0		0	310.012	0	0		0	153.093	0	0		0	310.012	0	0		0	207	0	0		0	475.541	0	0
	0	157.404	0	0		0	238.026	0	0		0	142.048	0	0		0	314.808	0	0		0	376.235	0	0		0	310.969	0	0		0	153.565	0	0		0	310.969	0	0		0	207.639	0	0		0	477.008	0	0
	0	157.889	0	0		0	238.758	0	0		0	142.485	0	0		0	315.777	0	0		0	377.392	0	0		0	311.926	0	0		0	154.038	0	0		0	311.926	0	0		0	208.278	0	0		0	478.476	0	0
	0	158.373	0	0		0	239.491	0	0		0	142.922	0	0		0	316.746	0	0		0	378.55	0	0		0	312.883	0	0		0	154.51	0	0		0	312.883	0	0		0	208.917	0	0		0	479.944	0	0
	0	158.857	0	0		0	240.223	0	0		0	143.359	0	0		0	317.714	0	0		0	379.707	0	0		9.80749	313.84	3.125	154.821		0	154.983	0	0		8.55927	313.84	2.72727	4.07931		0	209.556	0	0		0	481.412	0	0
	0	159.341	0	0		0	240.956	0	0		0	143.796	0	0		0	318.683	0	0		6.34775	380.865	1.66667	478.175		0	314.797	0	0		0	155.455	0	0		0	314.797	0	0		0	210.195	0	0		0	482.879	0	0
	0	159.826	0	0		6.0422	241.688	2.5	29.7958		0	144.233	0	0		0	319.652	0	0		0	382.023	0	0		0	315.753	0	0		0	155.928	0	0		0	315.753	0	0		0	210.833	0	0		0	484.347	0	0
	0	160.31	0	0		0	242.42	0	0		8.68021	144.67	6	14.5427		0	320.62	0	0		0	383.18	0	0		0	316.71	0	0		0	156.4	0	0		0	316.71	0	0		8.45889	211.472	4	113.783		0	485.815	0	0
	0	160.794	0	0		0	243.153	0	0		0	145.107	0	0		0	321.589	0	0		0	384.338	0	0		0	317.667	0	0		9.50744	156.873	6.06061	16.1763		0	317.667	0	0		0	212.111	0	0		0	487.282	0	0
	0	161.279	0	0		0	243.885	0	0		0	145.544	0	0		0	322.558	0	0		0	385.496	0	0		0	318.624	0	0		0	157.345	0	0		0	318.624	0	0		0	212.75	0	0		0	488.75	0	0
	0	161.763	0	0		0	244.617	0	0		0	145.981	0	0		0	323.526	0	0		0	386.653	0	0		0	319.581	0	0		0	157.818	0	0		14.5264	319.581	4.54545	1.914		0	213.389	0	0		0	490.218	0	0
	0	162.248	0	0		0	245.35	0	0		0	146.418	0	0		0	324.495	0	0		0	387.811	0	0		0	320.538	0	0		0	158.29	0	0		0	320.538	0	0		0	214.028	0	0		0	491.686	0	0
	0	162.732	0	0		0	246.082	0	0		0	146.856	0	0		0	325.464	0	0		0	388.969	0	0		0	321.495	0	0		0	158.763	0	0		0	321.495	0	0		0	214.667	0	0		0	493.153	0	0
	10.201	163.216	6.25	3.13573		0	246.815	0	0		0	147.293	0	0		5.93513	326.432	1.81818	81.6913		0	390.126	0	0		0	322.451	0	0		0	159.235	0	0		0	322.451	0	0		0	215.306	0	0		0	494.621	0	0
	0	163.7	0	0		3.09434	247.547	1.25	20.3839		0	147.73	0	0		0	327.401	0	0		0	391.284	0	0		0	323.408	0	0		0	159.708	0	0		0	323.408	0	0		0	215.945	0	0		0	496.089	0	0
	0	164.185	0	0		0	248.279	0	0		0	148.167	0	0		0	328.37	0	0		0	392.442	0	0		0	324.365	0	0		0	160.18	0	0		0	324.365	0	0		0	216.583	0	0		0	497.557	0	0
	0	164.669	0	0		0	249.012	0	0		0	148.604	0	0		0	329.338	0	0		0	393.599	0	0		0	325.322	0	0		0	160.653	0	0		0	325.322	0	0		0	217.222	0	0		0	499.024	0	0
	0	165.153	0	0		0	249.744	0	0		0	149.041	0	0		0	330.307	0	0		0	394.757	0	0		0	326.279	0	0		0	161.125	0	0		20.7632	326.279	6.36364	0.00277264		0	217.861	0	0		0	500.492	0	0
	0	165.638	0	0		0	250.476	0	0		0	149.478	0	0		0	331.275	0	0		0	395.914	0	0		0	327.235	0	0		0	161.598	0	0		0	327.235	0	0		0	218.5	0	0		0	501.96	0	0
	0	166.122	0	0		0	251.209	0	0		0	149.915	0	0		3.0204	332.244	0.909091	48.2357		0	397.072	0	0		0	328.192	0	0		0	162.07	0	0		0	328.192	0	0		0	219.139	0	0		0	503.427	0	0
	0	166.606	0	0		0	251.941	0	0		0	150.352	0	0		0	333.213	0	0		0	398.23	0	0		0	329.149	0	0		0	162.543	0	0		0	329.149	0	0		0	219.778	0	0		0	504.895	0	0
	0	167.091	0	0		0	252.674	0	0		12.0631	150.789	8	37.6274		0	334.181	0	0		0	399.387	0	0		0	330.106	0	0		9.05641	163.015	5.55556	28.0748		0	330.106	0	0		6.6125	220.417	3	116.36		0	506.363	0	0
	0	167.575	0	0		6.33515	253.406	2.5	53.4561		0	151.226	0	0		0	335.15	0	0		0	400.545	0	0		0	331.063	0	0		0	163.488	0	0		0	331.063	0	0		0	221.056	0	0		0	507.83	0	0
	0	168.059	0	0		0	254.138	0	0		0	151.663	0	0		0	336.119	0	0		0	401.703	0	0		5.18781	332.02	1.5625	122.563		0	163.96	0	0		15.0918	332.02	4.54545	1.60906		0	221.695	0	0		0	509.298	0	0
	0	168.544	0	0		0	254.871	0	0		0	152.1	0	0		0	337.087	0	0		0	402.86	0	0		0	332.976	0	0		0	164.433	0	0		0	332.976	0	0		0	222.333	0	0		0	510.766	0	0
	7.54589	169.028	4.46429	7.42325		0	255.603	0	0		0	152.537	0	0		12.2929	338.056	3.63636	224.96		0	404.018	0	0		0	333.933	0	0		0	164.905	0	0		0	333.933	0	0		0	222.972	0	0		7.76112	512.234	1.51515	505.795
	0	169.512	0	0		0	256.336	0	0		0	152.975	0	0		0	339.024	0	0		0	405.176	0	0		0	334.89	0	0		0	165.378	0	0		0	334.89	0	0		0	223.611	0	0		0	513.701	0	0
	0	169.997	0	0		0	257.068	0	0		0	153.412	0	0		0	339.993	0	0		0	406.333	0	0		0	335.847	0	0		0	165.85	0	0		0	335.847	0	0		0	224.25	0	0		0	515.169	0	0
	0	170.481	0	0		0	257.8	0	0		0	153.849	0	0		0	340.962	0	0		0	407.491	0	0		0	336.804	0	0		0	166.323	0	0		0	336.804	0	0		0	224.889	0	0		0	516.637	0	0
	0	170.965	0	0		0	258.533	0	0		0	154.286	0	0		0	341.93	0	0		0	408.649	0	0		5.27751	337.761	1.5625	138.967		0	166.795	0	0		30.7055	337.761	9.09091	12.4248		0	225.528	0	0		0	518.105	0	0
	0	171.45	0	0		9.72245	259.265	3.75	101.791		0	154.723	0	0		0	342.899	0	0		0	409.806	0	0		0	338.717	0	0		0	167.268	0	0		0	338.717	0	0		0	226.167	0	0		0	519.572	0	0
	0	171.934	0	0		0	259.998	0	0		0	155.16	0	0		0	343.868	0	0		3.4247	410.964	0.833333	331.607		0	339.674	0	0		0	167.74	0	0		0	339.674	0	0		0	226.806	0	0		0	521.04	0	0
	0	172.418	0	0		0	260.73	0	0		0	155.597	0	0		0	344.836	0	0		0	412.122	0	0		0	340.631	0	0		0	168.213	0	0		0	340.631	0	0		0	227.445	0	0		0	522.508	0	0
	0	172.903	0	0		0	261.462	0	0		0	156.034	0	0		0	345.805	0	0		0	413.279	0	0		0	341.588	0	0		0	168.685	0	0		0	341.588	0	0		0	228.083	0	0		0	523.975	0	0
	0	173.387	0	0		0	262.195	0	0		0	156.471	0	0		0	346.774	0	0		0	414.437	0	0		0	342.545	0	0		5.98033	169.158	3.53535	28.9633		0	342.545	0	0		0	228.722	0	0		0	525.443	0	0
	0	173.871	0	0		0	262.927	0	0		7.8454	156.908	5	38.6597		0	347.742	0	0		0	415.594	0	0		0	343.502	0	0		0	169.63	0	0		0	343.502	0	0		4.58722	229.361	2	101.455		0	526.911	0	0
	0	174.356	0	0		0	263.659	0	0		0	157.345	0	0		0	348.711	0	0		0	416.752	0	0		5.38216	344.458	1.5625	159.407		0	170.103	0	0		9.39432	344.458	2.72727	9.22185		0	230	0	0		0	528.379	0	0
	12.4886	174.84	7.14286	24.9963		0	264.392	0	0		0	157.782	0	0		12.7156	349.68	3.63636	296.364		0	417.91	0	0		0	345.415	0	0		0	170.575	0	0		0	345.415	0	0		0	230.639	0	0		0	529.846	0	0
	0	175.324	0	0		0	265.124	0	0		0	158.219	0	0		0	350.648	0	0		0	419.067	0	0		0	346.372	0	0		0	171.048	0	0		0	346.372	0	0		0	231.278	0	0		0	531.314	0	0
	0	175.808	0	0		0	265.857	0	0		0	158.656	0	0		0	351.617	0	0		0	420.225	0	0		0	347.329	0	0		0	171.52	0	0		0	347.329	0	0		0	231.917	0	0		0	532.782	0	0
	0	176.293	0	0		0	266.589	0	0		0	159.094	0	0		0	352.586	0	0		0	421.383	0	0		0	348.286	0	0		0	171.993	0	0		0	348.286	0	0		0	232.556	0	0		0	534.249	0	0
	0	176.777	0	0		0	267.321	0	0		0	159.53	0	0		0	353.554	0	0		0	422.54	0	0		0	349.243	0	0		0	172.465	0	0		0	349.243	0	0		0	233.195	0	0		0	535.717	0	0
	0	177.261	0	0		0	268.054	0	0		0	159.968	0	0		0	354.523	0	0		0	423.698	0	0		16.4156	350.199	4.6875	534.129		0	172.938	0	0		3.18363	350.199	0.909091	5.293		0	233.833	0	0		0	537.185	0	0
	0	177.746	0	0		0	268.786	0	0		0	160.405	0	0		0	355.491	0	0		0	424.856	0	0		0	351.156	0	0		0	173.411	0	0		0	351.156	0	0		0	234.472	0	0		0	538.653	0	0
	0	178.23	0	0		0	269.519	0	0		0	160.842	0	0		0	356.46	0	0		0	426.013	0	0		0	352.113	0	0		0	173.883	0	0		0	352.113	0	0		0	235.111	0	0		0	540.12	0	0
	0	178.714	0	0		0	270.251	0	0		0	161.279	0	0		0	357.429	0	0		0	427.171	0	0		0	353.07	0	0		0	174.356	0	0		0	353.07	0	0		0	235.75	0	0		0	541.588	0	0
	0	179.199	0	0		0	270.983	0	0		0	161.716	0	0		0	358.397	0	0		0	428.329	0	0		0	354.027	0	0		7.06376	174.828	4.0404	47.5145		0	354.027	0	0		0	236.389	0	0		0	543.056	0	0
	0	179.683	0	0		6.79289	271.716	2.5	104.17		0	162.153	0	0		0	359.366	0	0		0	429.486	0	0		0	354.983	0	0		0	175.3	0	0		0	354.983	0	0		0	237.028	0	0		0	544.523	0	0
	0	180.167	0	0		0	272.448	0	0		0	162.59	0	0		0	360.335	0	0		0	430.644	0	0		16.6847	355.94	4.6875	593.127		0	175.773	0	0		6.47164	355.94	1.81818	16.2226		0	237.667	0	0		0	545.991	0	0
	0	180.652	0	0		0	273.18	0	0		13.0422	163.027	8	92.0745		0	361.303	0	0		0	431.801	0	0		0	356.897	0	0		0	176.245	0	0		0	356.897	0	0		7.14917	238.306	3	192.807		0	547.459	0	0
	6.46914	181.136	3.57143	22.327		0	273.913	0	0		0	163.464	0	0		6.58676	362.272	1.81818	192.403		0	432.959	0	0		0	357.854	0	0		0	176.718	0	0		0	357.854	0	0		0	238.945	0	0		0	548.927	0	0
	0	181.62	0	0		0	274.645	0	0		0	163.901	0	0		0	363.241	0	0		0	434.117	0	0		0	358.811	0	0		0	177.19	0	0		0	358.811	0	0		0	239.583	0	0		0	550.394	0	0
	0	182.105	0	0		0	275.378	0	0		0	164.338	0	0		0	364.209	0	0		0	435.274	0	0		0	359.768	0	0		0	177.663	0	0		0	359.768	0	0		0	240.222	0	0		0	551.862	0	0
	0	182.589	0	0		0	276.11	0	0		0	164.775	0	0		0	365.178	0	0		0	436.432	0	0		0	360.724	0	0		0	178.136	0	0		0	360.724	0	0		0	240.861	0	0		0	553.33	0	0
	0	183.073	0	0		0	276.842	0	0		0	165.212	0	0		0	366.147	0	0		0	437.59	0	0		0	361.681	0	0		0	178.608	0	0		0	361.681	0	0		0	241.5	0	0		0	554.798	0	0
	0	183.558	0	0		6.93937	277.575	2.5	123.939		0	165.649	0	0		0	367.115	0	0		0	438.747	0	0		11.3324	362.638	3.125	443.908		0	179.081	0	0		16.4836	362.638	4.54545	60.7834		0	242.139	0	0		8.42826	556.265	1.51515	778.956
	0	184.042	0	0		0	278.307	0	0		0	166.087	0	0		6.69243	368.084	1.81818	214.758		0	439.905	0	0		0	363.595	0	0		0	179.553	0	0		0	363.595	0	0		0	242.778	0	0		0	557.733	0	0
	0	184.526	0	0		0	279.04	0	0		0	166.524	0	0		0	369.052	0	0		0	441.063	0	0		0	364.552	0	0		0	180.026	0	0		0	364.552	0	0		0	243.417	0	0		0	559.201	0	0
	0	185.011	0	0		0	279.772	0	0		0	166.961	0	0		0	370.021	0	0		0	442.22	0	0		0	365.509	0	0		0	180.498	0	0		0	365.509	0	0		0	244.056	0	0		0	560.668	0	0
	0	185.495	0	0		0	280.504	0	0		0	167.398	0	0		0	370.99	0	0		0	443.378	0	0		0	366.465	0	0		10.0539	180.971	5.55556	90.8338		0	366.465	0	0		0	244.695	0	0		0	562.136	0	0
	0	185.979	0	0		0	281.237	0	0		0	167.835	0	0		0	371.958	0	0		0	444.536	0	0		0	367.422	0	0		0	181.443	0	0		0	367.422	0	0		0	245.333	0	0		0	563.604	0	0
	0	186.464	0	0		0	281.969	0	0		0	168.272	0	0		0	372.927	0	0		0	445.693	0	0		17.2678	368.379	4.6875	731.555		0	181.916	0	0		10.0467	368.379	2.72727	48.8201		0	245.972	0	0		8.56169	565.071	1.51515	840.638
	1.66918	186.948	0.892857	8.47819		0	282.702	0	0		0	168.709	0	0		3.39905	373.896	0.909091	119.17		0	446.851	0	0		0	369.336	0	0		0	182.388	0	0		0	369.336	0	0		0	246.611	0	0		0	566.539	0	0
	0	187.432	0	0		3.54293	283.434	1.25	72.7121		5.07438	169.146	3	48.1066		0	374.864	0	0		0	448.009	0	0		0	370.293	0	0		0	182.861	0	0		0	370.293	0	0		0	247.25	0	0		0	568.007	0	0
	0	187.917	0	0		0	284.166	0	0		0	169.583	0	0		0	375.833	0	0		0	449.166	0	0		0	371.25	0	0		0	183.333	0	0		0	371.25	0	0		0	247.889	0	0		0	569.475	0	0
	0	188.401	0	0		0	284.899	0	0		0	170.02	0	0		0	376.801	0	0		0	450.324	0	0		0	372.206	0	0		0	183.806	0	0		0	372.206	0	0		0	248.528	0	0		0	570.942	0	0
	0	188.885	0	0		0	285.631	0	0		0	170.457	0	0		0	377.77	0	0		0	451.481	0	0		0	373.163	0	0		0	184.278	0	0		0	373.163	0	0		0	249.167	0	0		0	572.41	0	0
	0	189.369	0	0		0	286.363	0	0		0	170.894	0	0		0	378.739	0	0		0	452.639	0	0		11.6913	374.12	3.125	533.557		0	184.751	0	0		0	374.12	0	0		0	249.806	0	0		8.69512	573.878	1.51515	904.671
	0	189.854	0	0		0	287.096	0	0		0	171.331	0	0		0	379.707	0	0		0	453.797	0	0		0	375.077	0	0		0	185.223	0	0		0	375.077	0	0		0	250.445	0	0		0	575.346	0	0
	0	190.338	0	0		0	287.828	0	0		0	171.768	0	0		0	380.676	0	0		0	454.954	0	0		0	376.034	0	0		0	185.696	0	0		0	376.034	0	0		0	251.083	0	0		0	576.813	0	0
	0	190.822	0	0		0	288.561	0	0		0	172.206	0	0		0	381.645	0	0		0	456.112	0	0		0	376.99	0	0		0	186.168	0	0		0	376.99	0	0		0	251.722	0	0		0	578.281	0	0
	0	191.307	0	0		0	289.293	0	0		0	172.643	0	0		0	382.613	0	0		0	457.27	0	0		0	377.947	0	0		0	186.641	0	0		0	377.947	0	0		0	252.361	0	0		0	579.749	0	0
	0	191.791	0	0		3.62532	290.025	1.25	85.8232		0	173.08	0	0		0	383.582	0	0		0	458.427	0	0		0	378.904	0	0		4.72508	187.113	2.52525	54.7852		0	378.904	0	0		0	253	0	0		0	581.216	0	0
	0	192.275	0	0		0	290.758	0	0		0	173.517	0	0		0	384.551	0	0		0	459.585	0	0		0	379.861	0	0		0	187.586	0	0		17.2664	379.861	4.54545	131.522		0	253.639	0	0		8.82855	582.684	1.51515	971.054
	0	192.76	0	0		0	291.49	0	0		0	173.954	0	0		0	385.519	0	0		0	460.743	0	0		0	380.818	0	0		0	188.058	0	0		0	380.818	0	0		0	254.278	0	0		0	584.152	0	0
	12.0778	193.244	6.25	86.0771		0	292.223	0	0		0	174.391	0	0		3.51353	386.488	0.909091	146.825		0	461.9	0	0		0	381.775	0	0		0	188.531	0	0		0	381.775	0	0		0	254.917	0	0		0	585.62	0	0
	0	193.728	0	0		0	292.955	0	0		0	174.828	0	0		0	387.457	0	0		0	463.058	0	0		0	382.731	0	0		0	189.003	0	0		0	382.731	0	0		0	255.556	0	0		0	587.087	0	0
	0	194.213	0	0		0	293.687	0	0		5.25795	175.265	3	63.9315		0	388.425	0	0		0	464.216	0	0		0	383.688	0	0		0	189.476	0	0		0	383.688	0	0		7.68583	256.195	3	288.453		0	588.555	0	0
	0	194.697	0	0		0	294.42	0	0		0	175.702	0	0		0	389.394	0	0		0	465.373	0	0		0	384.645	0	0		0	189.948	0	0		0	384.645	0	0		0	256.833	0	0		0	590.023	0	0
	0	195.181	0	0		0	295.152	0	0		0	176.139	0	0		0	390.363	0	0		0	466.531	0	0		0	385.602	0	0		0	190.421	0	0		0	385.602	0	0		0	257.472	0	0		8.96198	591.49	1.51515	1039.79
	0	195.666	0	0		14.7942	295.885	5	393.558		0	176.576	0	0		0	391.331	0	0		0	467.688	0	0		6.03998	386.559	1.5625	319.988		0	190.893	0	0		0	386.559	0	0		0	258.111	0	0		0	592.958	0	0
	0	196.15	0	0		0	296.617	0	0		0	177.013	0	0		0	392.3	0	0		0	468.846	0	0		0	387.516	0	0		0	191.366	0	0		0	387.516	0	0		0	258.75	0	0		0	594.426	0	0
	0	196.634	0	0		0	297.349	0	0		0	177.45	0	0		0	393.268	0	0		0	470.004	0	0		0	388.473	0	0		0	191.838	0	0		0	388.473	0	0		0	259.389	0	0		0	595.894	0	0
	0	197.119	0	0		0	298.082	0	0		0	177.887	0	0		0	394.237	0	0		0	471.161	0	0		0	389.429	0	0		0	192.311	0	0		0	389.429	0	0		0	260.028	0	0		0	597.361	0	0
	0	197.603	0	0		0	298.814	0	0		0	178.325	0	0		0	395.206	0	0		0	472.319	0	0		0	390.386	0	0		0	192.783	0	0		0	390.386	0	0		0	260.667	0	0		0	598.829	0	0
	0	198.087	0	0		0	299.546	0	0		0	178.762	0	0		0	396.174	0	0		0	473.477	0	0		0	391.343	0	0		3.90416	193.256	2.0202	56.1504		0	391.343	0	0		0	261.306	0	0		9.09541	600.297	1.51515	1110.87
	0	198.571	0	0		0	300.279	0	0		0	179.199	0	0		0	397.143	0	0		0	474.634	0	0		12.2594	392.3	3.125	692.354		0	193.728	0	0		0	392.3	0	0		0	261.945	0	0		0	601.764	0	0
	8.88642	199.056	4.46429	82.2489		0	301.011	0	0		0	179.636	0	0		0	398.112	0	0		0	475.792	0	0		0	393.257	0	0		0	194.201	0	0		0	393.257	0	0		0	262.583	0	0		0	603.232	0	0
	0	199.54	0	0		3.7718	301.744	1.25	111.814		0	180.073	0	0		0	399.08	0	0		0	476.95	0	0		0	394.214	0	0		0	194.673	0	0		0	394.214	0	0		0	263.222	0	0		0	604.7	0	0
	0	200.024	0	0		0	302.476	0	0		0	180.51	0	0		0	400.049	0	0		0	478.107	0	0		0	395.17	0	0		0	195.146	0	0		0	395.17	0	0		0	263.861	0	0		0	606.168	0	0
	0	200.509	0	0		0	303.208	0	0		5.42841	180.947	3	80.638		0	401.018	0	0		0	479.265	0	0		0	396.127	0	0		0	195.618	0	0		0	396.127	0	0		0	264.5	0	0		0	607.635	0	0
	0	200.993	0	0		0	303.941	0	0		0	181.384	0	0		0	401.986	0	0		0	480.423	0	0		0	397.084	0	0		0	196.091	0	0		0	397.084	0	0		0	265.139	0	0		0	609.103	0	0
	0	201.477	0	0		0	304.673	0	0		0	181.821	0	0		0	402.955	0	0		0	481.58	0	0		6.21939	398.041	1.5625	373.396		0	196.563	0	0		14.4742	398.041	3.63636	188.357		0	265.778	0	0		0	610.571	0	0
	0	201.962	0	0		0	305.406	0	0		0	182.258	0	0		0	403.923	0	0		0	482.738	0	0		0	398.998	0	0		0	197.036	0	0		0	398.998	0	0		0	266.417	0	0		0	612.038	0	0
	0	202.446	0	0		0	306.138	0	0		0	182.695	0	0		0	404.892	0	0		0	483.896	0	0		0	399.954	0	0		0	197.508	0	0		0	399.954	0	0		0	267.056	0	0		0	613.506	0	0
	0	202.93	0	0		0	306.87	0	0		0	183.132	0	0		0	405.861	0	0		0	485.053	0	0		0	400.911	0	0		0	197.981	0	0		0	400.911	0	0		0	267.695	0	0		0	614.974	0	0
	0	203.415	0	0		11.5351	307.603	3.75	378.291		0	183.569	0	0		0	406.829	0	0		0	486.211	0	0		0	401.868	0	0		0	198.453	0	0		0	401.868	0	0		0	268.333	0	0		0	616.442	0	0
	0	203.899	0	0		0	308.335	0	0		0	184.006	0	0		0	407.798	0	0		0	487.368	0	0		0	402.825	0	0		0	198.926	0	0		0	402.825	0	0		0	268.972	0	0		9.36227	617.909	1.51515	1260.08
	0	204.383	0	0		0	309.067	0	0		0	184.444	0	0		0	408.767	0	0		0	488.526	0	0		0	403.782	0	0		4.02825	199.398	2.0202	69.9971		0	403.782	0	0		0	269.611	0	0		0	619.377	0	0
	0	204.868	0	0		0	309.8	0	0		0	184.881	0	0		0	409.735	0	0		0	489.684	0	0		6.32404	404.739	1.5625	406.453		0	199.871	0	0		0	404.739	0	0		0	270.25	0	0		0	620.845	0	0
	5.5005	205.352	2.67857	64.8889		0	310.532	0	0		0	185.318	0	0		3.73367	410.704	0.909091	208.111		0	490.841	0	0		0	405.695	0	0		0	200.343	0	0		0	405.695	0	0		0	270.889	0	0		0	622.312	0	0
	0	205.836	0	0		0	311.265	0	0		0	185.755	0	0		0	411.673	0	0		0	491.999	0	0		0	406.652	0	0		0	200.816	0	0		0	406.652	0	0		0	271.528	0	0		0	623.78	0	0
	0	206.321	0	0		0	311.997	0	0		0	186.192	0	0		0	412.641	0	0		0	493.157	0	0		0	407.609	0	0		0	201.288	0	0		0	407.609	0	0		0	272.167	0	0		0	625.248	0	0
	0	206.805	0	0		0	312.729	0	0		0	186.629	0	0		0	413.61	0	0		0	494.314	0	0		0	408.566	0	0		0	201.761	0	0		0	408.566	0	0		0	272.806	0	0		0	626.716	0	0
	0	207.289	0	0		0	313.462	0	0		1.87066	187.066	1	33.5985		0	414.579	0	0		0	495.472	0	0		0	409.523	0	0		0	202.233	0	0		0	409.523	0	0		10.9378	273.445	4	531.825		0	628.183	0	0
	0	207.774	0	0		0	314.194	0	0		0	187.503	0	0		0	415.547	0	0		0	496.63	0	0		0	410.479	0	0		0	202.706	0	0		3.73163	410.479	0.909091	64.7726		0	274.083	0	0		0	629.651	0	0
	0	208.258	0	0		0	314.927	0	0		0	187.94	0	0		0	416.516	0	0		0	497.787	0	0		0	411.436	0	0		0	203.179	0	0		0	411.436	0	0		0	274.722	0	0		0	631.119	0	0
	0	208.742	0	0		0	315.659	0	0		0	188.377	0	0		0	417.485	0	0		0	498.945	0	0		0	412.393	0	0		0	203.651	0	0		0	412.393	0	0		0	275.361	0	0		0	632.587	0	0
	0	209.227	0	0		0	316.391	0	0		0	188.814	0	0		0	418.453	0	0		0	500.103	0	0		0	413.35	0	0		0	204.124	0	0		0	413.35	0	0		0	276	0	0		0	634.054	0	0
	0	209.711	0	0		0	317.124	0	0		0	189.251	0	0		0	419.422	0	0		0	501.26	0	0		0	414.307	0	0		0	204.596	0	0		0	414.307	0	0		0	276.639	0	0		0	635.522	0	0
	0	210.195	0	0		0	317.856	0	0		0	189.688	0	0		0	420.39	0	0		0	502.418	0	0		0	415.264	0	0		1.0357	205.069	0.50505	21.033		0	415.264	0	0		0	277.278	0	0		0	636.99	0	0
	0	210.679	0	0		0	318.589	0	0		0	190.125	0	0		0	421.359	0	0		0	503.575	0	0		6.50345	416.221	1.5625	466.384		0	205.541	0	0		7.56765	416.221	1.81818	147.766		0	277.917	0	0		0	638.457	0	0
	9.42696	211.164	4.46429	135.196		0	319.321	0	0		0	190.562	0	0		7.67869	422.328	1.81818	482.631		0	504.733	0	0		0	417.177	0	0		0	206.013	0	0		0	417.177	0	0		0	278.556	0	0		0	639.925	0	0
	0	211.648	0	0		4.00067	320.053	1.25	159.297		0	191	0	0		0	423.296	0	0		0	505.891	0	0		0	418.134	0	0		0	206.486	0	0		0	418.134	0	0		0	279.195	0	0		0	641.393	0	0
	0	212.132	0	0		0	320.786	0	0		0	191.437	0	0		0	424.265	0	0		0	507.048	0	0		0	419.091	0	0		0	206.958	0	0		0	419.091	0	0		0	279.833	0	0		0	642.861	0	0
	0	212.617	0	0		0	321.518	0	0		0	191.874	0	0		0	425.234	0	0		0	508.206	0	0		0	420.048	0	0		0	207.431	0	0		0	420.048	0	0		0	280.472	0	0		0	644.328	0	0
	0	213.101	0	0		0	322.25	0	0		0	192.311	0	0		0	426.202	0	0		0	509.364	0	0		0	421.005	0	0		0	207.904	0	0		0	421.005	0	0		0	281.111	0	0		0	645.796	0	0
	0	213.585	0	0		0	322.983	0	0		0	192.748	0	0		0	427.171	0	0		0	510.521	0	0		0	421.962	0	0		0	208.376	0	0		0	421.962	0	0		0	281.75	0	0		0	647.264	0	0
	0	214.07	0	0		0	323.715	0	0		1.93185	193.185	1	41.0665		11.6765	428.139	2.72727	776.517		0	511.679	0	0		6.6081	422.918	1.5625	503.246		0	208.849	0	0		7.68942	422.918	1.81818	170.539		2.82389	282.389	1	154.384		0	648.731	0	0
	0	214.554	0	0		0	324.448	0	0		0	193.622	0	0		0	429.108	0	0		0	512.837	0	0		0	423.875	0	0		0	209.321	0	0		0	423.875	0	0		0	283.028	0	0		0	650.199	0	0
	0	215.038	0	0		0	325.18	0	0		0	194.059	0	0		0	430.077	0	0		0	513.994	0	0		0	424.832	0	0		0	209.794	0	0		0	424.832	0	0		0	283.667	0	0		0	651.667	0	0
	0	215.523	0	0		0	325.912	0	0		0	194.496	0	0		0	431.046	0	0		0	515.152	0	0		0	425.789	0	0		0	210.266	0	0		0	425.789	0	0		0	284.306	0	0		9.89598	653.135	1.51515	1586.72
	0	216.007	0	0		0	326.645	0	0		0	194.933	0	0		0	432.014	0	0		0	516.309	0	0		0	426.746	0	0		0	210.739	0	0		0	426.746	0	0		0	284.945	0	0		0	654.602	0	0
	0	216.491	0	0		0	327.377	0	0		0	195.37	0	0		0	432.983	0	0		0	517.467	0	0		0	427.702	0	0		2.13345	211.211	1.0101	50.4551		0	427.702	0	0		0	285.583	0	0		0	656.07	0	0
	0	216.976	0	0		0	328.11	0	0		0	195.807	0	0		0	433.951	0	0		0	518.625	0	0		0	428.659	0	0		0	211.684	0	0		3.8969	428.659	0.909091	95.6781		0	286.222	0	0		0	657.538	0	0
	3.88321	217.46	1.78571	67.1609		0	328.842	0	0		0	196.244	0	0		0	434.92	0	0		0	519.783	0	0		0	429.616	0	0		0	212.156	0	0		0	429.616	0	0		0	286.861	0	0		0	659.005	0	0
	0	217.944	0	0		0	329.574	0	0		0	196.681	0	0		0	435.889	0	0		0	520.94	0	0		0	430.573	0	0		0	212.629	0	0		0	430.573	0	0		0	287.5	0	0		0	660.473	0	0
	0	218.429	0	0		0	330.307	0	0		0	197.119	0	0		0	436.857	0	0		0	522.098	0	0		0	431.53	0	0		0	213.101	0	0		0	431.53	0	0		0	288.139	0	0		0	661.941	0	0
	0	218.913	0	0		0	331.039	0	0		0	197.556	0	0		0	437.826	0	0		0	523.255	0	0		0	432.487	0	0		0	213.574	0	0		0	432.487	0	0		0	288.778	0	0		0	663.409	0	0
	0	219.397	0	0		0	331.772	0	0		0	197.993	0	0		0	438.795	0	0		0	524.413	0	0		0	433.443	0	0		0	214.046	0	0		0	433.443	0	0		0	289.417	0	0		0	664.876	0	0
	0	219.882	0	0		0	332.504	0	0		0	198.43	0	0		0	439.763	0	0		0	525.571	0	0		6.7875	434.4	1.5625	569.7		0	214.519	0	0		7.89819	434.4	1.81818	213.372		0	290.056	0	0		0	666.344	0	0
	0	220.366	0	0		0	333.236	0	0		0	198.867	0	0		4.00665	440.732	0.909091	298.913		0	526.728	0	0		0	435.357	0	0		0	214.991	0	0		0	435.357	0	0		0	290.695	0	0		0	667.812	0	0
	0	220.85	0	0		0	333.969	0	0		1.99304	199.304	1	49.2835		0	441.701	0	0		0	527.886	0	0		0	436.314	0	0		0	215.464	0	0		0	436.314	0	0		0	291.333	0	0		0	669.279	0	0
	0	221.335	0	0		0	334.701	0	0		0	199.741	0	0		0	442.669	0	0		0	529.044	0	0		0	437.271	0	0		0	215.936	0	0		0	437.271	0	0		0	291.972	0	0		0	670.747	0	0
	0	221.819	0	0		0	335.433	0	0		0	200.178	0	0		0	443.638	0	0		0	530.201	0	0		0	438.228	0	0		0	216.409	0	0		0	438.228	0	0		0	292.611	0	0		0	672.215	0	0
	0	222.303	0	0		0	336.166	0	0		0	200.615	0	0		0	444.606	0	0		0	531.359	0	0		0	439.184	0	0		0	216.881	0	0		0	439.184	0	0		0	293.25	0	0		0	673.683	0	0
	0	222.787	0	0		0	336.898	0	0		0	201.052	0	0		0	445.575	0	0		0	532.517	0	0		0	440.141	0	0		1.09775	217.354	0.50505	29.8033		0	440.141	0	0		0	293.889	0	0		0	675.15	0	0
	3.987	223.272	1.78571	80.4936		0	337.631	0	0		0	201.489	0	0		0	446.544	0	0		0	533.674	0	0		0	441.098	0	0		0	217.826	0	0		0	441.098	0	0		0	294.528	0	0		0	676.618	0	0
	0	223.756	0	0		0	338.363	0	0		0	201.926	0	0		0	447.512	0	0		0	534.832	0	0		0	442.055	0	0		0	218.299	0	0		0	442.055	0	0		0	295.167	0	0		0	678.086	0	0
	0	224.24	0	0		0	339.095	0	0		0	202.363	0	0		0	448.481	0	0		0	535.99	0	0		0	443.012	0	0		0	218.771	0	0		0	443.012	0	0		0	295.806	0	0		0	679.553	0	0
	0	224.725	0	0		0	339.828	0	0		0	202.8	0	0		0	449.45	0	0		0	537.147	0	0		0	443.969	0	0		0	219.244	0	0		0	443.969	0	0		0	296.445	0	0		0	681.021	0	0
	0	225.209	0	0		0	340.56	0	0		0	203.238	0	0		0	450.418	0	0		0	538.305	0	0		0	444.925	0	0		0	219.716	0	0		0	444.925	0	0		0	297.083	0	0		0	682.489	0	0
	0	225.694	0	0		0	341.293	0	0		0	203.675	0	0		0	451.387	0	0		0	539.462	0	0		0	445.882	0	0		0	220.189	0	0		0	445.882	0	0		0	297.722	0	0		0	683.957	0	0
	0	226.178	0	0		0	342.025	0	0		0	204.112	0	0		4.11232	452.356	0.909091	338.464		0	540.62	0	0		0	446.839	0	0		0	220.661	0	0		4.06217	446.839	0.909091	132.593		0	298.361	0	0		0	685.424	0	0
	0	226.662	0	0		0	342.757	0	0		0	204.549	0	0		0	453.324	0	0		0	541.778	0	0		0	447.796	0	0		0	221.134	0	0		0	447.796	0	0		0	299	0	0		0	686.892	0	0
	0	227.146	0	0		0	343.49	0	0		0	204.986	0	0		0	454.293	0	0		0	542.935	0	0		0	448.753	0	0		0	221.606	0	0		0	448.753	0	0		0	299.639	0	0		10.4297	688.36	1.51515	1950.95
	0	227.631	0	0		0	344.222	0	0		2.05423	205.423	1	58.2492		0	455.262	0	0		0	544.093	0	0		0	449.709	0	0		0	222.079	0	0		0	449.709	0	0		0	300.278	0	0		0	689.828	0	0
	0	228.115	0	0		0	344.954	0	0		0	205.86	0	0		0	456.23	0	0		0	545.251	0	0		0	450.666	0	0		0	222.551	0	0		0	450.666	0	0		0	300.917	0	0		0	691.295	0	0
	0	228.599	0	0		0	345.687	0	0		0	206.297	0	0		0	457.199	0	0		0	546.408	0	0		0	451.623	0	0		0	223.024	0	0		0	451.623	0	0		0	301.556	0	0		0	692.763	0	0
	0	229.084	0	0		0	346.419	0	0		0	206.734	0	0		0	458.167	0	0		0	547.566	0	0		0	452.58	0	0		0	223.496	0	0		4.11436	452.58	0.909091	145.498		0	302.195	0	0		0	694.231	0	0
	6.14914	229.568	2.67857	144.448		0	347.152	0	0		0	207.171	0	0		8.34793	459.136	1.81818	725.339		0	548.724	0	0		0	453.537	0	0		0	223.969	0	0		0	453.537	0	0		0	302.833	0	0		0	695.698	0	0
	0	230.052	0	0		0	347.884	0	0		0	207.608	0	0		0	460.105	0	0		0	549.881	0	0		0	454.494	0	0		0	224.441	0	0		0	454.494	0	0		0	303.472	0	0		0	697.166	0	0
	0	230.537	0	0		0	348.616	0	0		0	208.045	0	0		0	461.073	0	0		0	551.039	0	0		0	455.45	0	0		0	224.914	0	0		0	455.45	0	0		0	304.111	0	0		0	698.634	0	0
	0	231.021	0	0		0	349.349	0	0		0	208.482	0	0		0	462.042	0	0		0	552.197	0	0		0	456.407	0	0		0	225.386	0	0		0	456.407	0	0		0	304.75	0	0		0	700.102	0	0
	0	231.505	0	0		0	350.081	0	0		0	208.919	0	0		0	463.011	0	0		0	553.354	0	0		0	457.364	0	0		0	225.859	0	0		0	457.364	0	0		0	305.389	0	0		0	701.569	0	0
	0	231.99	0	0		0	350.814	0	0		0	209.357	0	0		0	463.979	0	0		0	554.512	0	0		0	458.321	0	0		0	226.331	0	0		0	458.321	0	0		0	306.028	0	0		0	703.037	0	0
	0	232.474	0	0		0	351.546	0	0		0	209.794	0	0		0	464.948	0	0		0	555.669	0	0		0	459.278	0	0		0	226.804	0	0		0	459.278	0	0		0	306.667	0	0		0	704.505	0	0
	0	232.958	0	0		0	352.278	0	0		0	210.231	0	0		0	465.917	0	0		0	556.827	0	0		0	460.235	0	0		0	227.276	0	0		0	460.235	0	0		0	307.306	0	0		0	705.972	0	0
	0	233.443	0	0		0	353.011	0	0		0	210.668	0	0		0	466.885	0	0		0	557.985	0	0		0	461.192	0	0		0	227.749	0	0		0	461.192	0	0		0	307.945	0	0		0	707.44	0	0
	0	233.927	0	0		0	353.743	0	0		2.11105	211.105	1	67.2451		0	467.854	0	0		0	559.142	0	0		0	462.148	0	0		0	228.221	0	0		0	462.148	0	0		0	308.583	0	0		0	708.908	0	0
	0	234.411	0	0		0	354.476	0	0		0	211.542	0	0		0	468.822	0	0		0	560.3	0	0		0	463.105	0	0		0	228.694	0	0		0	463.105	0	0		0	309.222	0	0		0	710.376	0	0
	0	234.896	0	0		0	355.208	0	0		0	211.979	0	0		0	469.791	0	0		0	561.458	0	0		0	464.062	0	0		1.15741	229.166	0.50505	39.674		0	464.062	0	0		0	309.861	0	0		0	711.843	0	0
	6.30482	235.38	2.67857	168.217		0	355.94	0	0		0	212.416	0	0		4.27963	470.76	0.909091	406.109		0	562.615	0	0		0	465.019	0	0		0	229.639	0	0		4.22744	465.019	0.909091	175.516		0	310.5	0	0		0	713.311	0	0
	0	235.864	0	0		0	356.673	0	0		0	212.853	0	0		0	471.728	0	0		0	563.773	0	0		0	465.976	0	0		0	230.111	0	0		0	465.976	0	0		0	311.139	0	0		0	714.779	0	0
	0	236.349	0	0		0	357.405	0	0		0	213.29	0	0		0	472.697	0	0		0	564.931	0	0		0	466.932	0	0		0	230.584	0	0		0	466.932	0	0		0	311.778	0	0		0	716.246	0	0
	0	236.833	0	0		0	358.137	0	0		0	213.727	0	0		0	473.666	0	0		0	566.088	0	0		0	467.889	0	0		0	231.056	0	0		0	467.889	0	0		0	312.417	0	0		0	717.714	0	0
	0	237.317	0	0		0	358.87	0	0		0	214.164	0	0		0	474.634	0	0		0	567.246	0	0		0	468.846	0	0		0	231.529	0	0		0	468.846	0	0		0	313.056	0	0		0	719.182	0	0
	0	237.802	0	0		0	359.602	0	0		0	214.601	0	0		0	475.603	0	0		0	568.404	0	0		0	469.803	0	0		0	232.001	0	0		0	469.803	0	0		0	313.695	0	0		0	720.65	0	0
	0	238.286	0	0		0	360.335	0	0		0	215.038	0	0		4.33247	476.572	0.909091	428.751		0	569.561	0	0		0	470.76	0	0		0	232.474	0	0		4.27963	470.76	0.909091	190.32		0	314.333	0	0		0	722.117	0	0
	0	238.77	0	0		0	361.067	0	0		0	215.476	0	0		0	477.54	0	0		0	570.719	0	0		0	471.717	0	0		0	232.946	0	0		0	471.717	0	0		0	314.972	0	0		0	723.585	0	0
	0	239.255	0	0		0	361.799	0	0		0	215.912	0	0		0	478.509	0	0		0	571.876	0	0		0	472.673	0	0		0	233.419	0	0		0	472.673	0	0		0	315.611	0	0		0	725.053	0	0
	0	239.739	0	0		0	362.532	0	0		0	216.35	0	0		0	479.478	0	0		0	573.034	0	0		0	473.63	0	0		0	233.892	0	0		0	473.63	0	0		0	316.25	0	0		0	726.52	0	0
	0	240.223	0	0		0	363.264	0	0		0	216.787	0	0		0	480.446	0	0		0	574.192	0	0		0	474.587	0	0		0	234.364	0	0		0	474.587	0	0		0	316.889	0	0		0	727.988	0	0
	0	240.707	0	0		0	363.997	0	0		0	217.224	0	0		0	481.415	0	0		0	575.349	0	0		0	475.544	0	0		0	234.837	0	0		0	475.544	0	0		0	317.528	0	0		0	729.456	0	0
	0	241.192	0	0		0	364.729	0	0		0	217.661	0	0		0	482.384	0	0		0	576.507	0	0		0	476.501	0	0		0	235.309	0	0		0	476.501	0	0		0	318.167	0	0		0	730.924	0	0
	2.15782	241.676	0.892857	65.3361		0	365.461	0	0		0	218.098	0	0		0	483.352	0	0		0	577.665	0	0		0	477.457	0	0		0	235.781	0	0		0	477.457	0	0		0	318.806	0	0		0	732.391	0	0
	0	242.16	0	0		0	366.194	0	0		0	218.535	0	0		0	484.321	0	0		0	578.822	0	0		0	478.414	0	0		0	236.254	0	0		0	478.414	0	0		0	319.445	0	0		0	733.859	0	0
	0	242.645	0	0		0	366.926	0	0		0	218.972	0	0		0	485.289	0	0		0	579.98	0	0		0	479.371	0	0		0	236.726	0	0		0	479.371	0	0		0	320.084	0	0		0	735.327	0	0
	0	243.129	0	0		0	367.659	0	0		0	219.409	0	0		0	486.258	0	0		0	581.138	0	0		0	480.328	0	0		0	237.199	0	0		0	480.328	0	0		0	320.722	0	0		0	736.795	0	0
	0	243.613	0	0		4.60489	368.391	1.25	324.923		0	219.846	0	0		0	487.227	0	0		0	582.295	0	0		0	481.285	0	0		0	237.672	0	0		0	481.285	0	0		0	321.361	0	0		0	738.262	0	0
	0	244.098	0	0		0	369.123	0	0		0	220.283	0	0		0	488.195	0	0		0	583.453	0	0		0	482.242	0	0		0	238.144	0	0		0	482.242	0	0		0	322	0	0		0	739.73	0	0
	0	244.582	0	0		0	369.856	0	0		0	220.72	0	0		0	489.164	0	0		0	584.611	0	0		0	483.199	0	0		0	238.617	0	0		0	483.199	0	0		0	322.639	0	0		0	741.198	0	0
	0	245.066	0	0		0	370.588	0	0		0	221.157	0	0		0	490.133	0	0		0	585.768	0	0		0	484.155	0	0		0	239.089	0	0		0	484.155	0	0		0	323.278	0	0		0	742.665	0	0
	0	245.551	0	0		0	371.32	0	0		0	221.595	0	0		0	491.101	0	0		0	586.926	0	0		0	485.112	0	0		0	239.562	0	0		0	485.112	0	0		0	323.917	0	0		0	744.133	0	0
	0	246.035	0	0		0	372.053	0	0		0	222.031	0	0		0	492.07	0	0		0	588.084	0	0		0	486.069	0	0		0	240.034	0	0		0	486.069	0	0		0	324.556	0	0		0	745.601	0	0
	0	246.519	0	0		0	372.785	0	0		0	222.469	0	0		0	493.038	0	0		0	589.241	0	0		0	487.026	0	0		0	240.507	0	0		0	487.026	0	0		0	325.195	0	0		0	747.069	0	0
	0	247.004	0	0		0	373.518	0	0		0	222.906	0	0		0	494.007	0	0		0	590.399	0	0		0	487.983	0	0		0	240.979	0	0		0	487.983	0	0		0	325.834	0	0		0	748.536	0	0
	2.20971	247.488	0.892857	74.5155		4.67812	374.25	1.25	348.968		2.23343	223.343	1	88.8136		4.49978	494.976	0.909091	504.499		4.92964	591.556	0.833333	1203.8		7.63968	488.94	1.5625	941.618		1.21945	241.452	0.50505	51.4348		4.4449	488.94	0.909091	241.15		3.26472	326.472	1	283.365		11.3637	750.004	1.51515	2678.83
	0			0		0			0		0			0		0			0		0			0		0			0		0			0		0			0		0			0		0			0
	0			0		0			0		0			0		0			0		0			0		0			0		0			0		0			0		0			0		0			0
	0			0		0			0		0			0		0			0		0			0		0			0		0			0		0			0		0			0		0			0
	0			0		0			0		0			0		0			0		0			0		0			0		0			0		0			0		0			0		0			0
	0			0		0			0		0			0		0			0		0			0		0			0		0			0		0			0		0			0		0			0
	0			0		0			0		0			0		0			0		0			0		0			0		0			0		0			0		0			0		0			0
	0			0		0			0		0			0		0			0		0			0		0			0		0			0		0			0		0			0		0			0
	0			0		0			0		0			0		0			0		0			0		0			0		0			0		0			0		0			0		0			0
	0			0		0			0		0			0		0			0		0			0		0			0		0			0		0			0		0			0		0			0
	0			0		0			0		0			0		0			0		0			0		0			0		0			0		0			0		0			0		0			0
	0			0		0			0		0			0		0			0		0			0		0			0		0			0		0			0		0			0		0			0
	0			0		0			0		0			0		0			0		0			0		0			0		0			0		0			0		0			0		0			0
	0			0		0			0		0			0		0			0		0			0		0			0		0			0		0			0		0			0		0			0
	0			0		0			0		0			0		0			0		0			0		0			0		0			0		0			0		0			0		0			0
	0			0		0			0		0			0		0			0		0			0		0			0		0			0		0			0		0			0		0			0
	0			0		0			0		0			0		0			0		0			0		0			0		0			0		0			0		0			0		0			0
	0			0		0			0		0			0		0			0		0			0		0			0		0			0		0			0		0			0		0			0
	0			0		0			0		0			0		0			0		0			0		0			0		0			0		0			0		0			0		0			0
	0			0		0			0		0			0		0			0		0			0		0			0		0			0		0			0		0			0		0			0
	0			0		0			0		0			0		0			0		0			0		0			0		0			0		0			0		0			0		0			0
	0			0		0			0		0			0		0			0		0			0		0			0		0			0		0			0		0			0		0			0
	0			0		0			0		0			0		0			0		0			0		0			0		0			0		0			0		0			0		0			0
	0			0		0			0		0			0		0			0		0			0		0			0		0			0		0			0		0			0		0			0
	0			0		0			0		0			0		0			0		0			0		0			0		0			0		0			0		0			0		0			0
	0			0		0			0		0			0		0			0		0			0		0			0		0			0		0			0		0			0		0			0
	0			0		0			0		0			0		0			0		0			0		0			0		0			0		0			0		0			0		0			0
	0			0		0			0		0			0		0			0		0			0		0			0		0			0		0			0		0			0		0			0
	0			0		0			0		0			0		0			0		0			0		0			0		0			0		0			0		0			0		0			0
	0			0		0			0		0			0		0			0		0			0		0			0		0			0		0			0		0			0		0			0
	0			0		0			0		0			0		0			0		0			0		0			0		0			0		0			0		0			0		0			0
	0			0		0			0		0			0		0			0		0			0		0			0		0			0		0			0		0			0		0			0
	0			0		0			0		0			0		0			0		0			0		0			0		0			0		0			0		0			0		0			0
	0			0		0			0		0			0		0			0		0			0		0			0		0			0		0			0		0			0		0			0
	0			0		0			0		0			0		0			0		0			0		0			0		0			0		0			0		0			0		0			0
	0			0		0			0		0			0		0			0		0			0		0			0		0			0		0			0		0			0		0			0
	0			0		0			0		0			0		0			0		0			0		0			0		0			0		0			0		0			0		0			0
	0			0		0			0		0			0		0			0		0			0		0			0		0			0		0			0		0			0		0			0
	0			0		0			0		0			0		0			0		0			0		0			0		0			0		0			0		0			0		0			0
	0			0		0			0		0			0		0			0		0			0		0			0		0			0		0			0		0			0		0			0
	0			0		0			0		0			0		0			0		0			0		0			0		0			0		0			0		0			0		0			0
	0			0		0			0		0			0		0			0		0			0		0			0		0			0		0			0		0			0		0			0
	0			0		0			0		0			0		0			0		0			0		0			0		0			0		0			0		0			0		0			0
	0			0		0			0		0			0		0			0		0			0		0			0		0			0		0			0		0			0		0			0
	0			0		0			0		0			0		0			0		0			0		0			0		0			0		0			0		0			0		0			0
	0			0		0			0		0			0		0			0		0			0		0			0		0			0		0			0		0			0		0			0
	0			0		0			0		0			0		0			0		0			0		0			0		0			0		0			0		0			0		0			0
	0			0		0			0		0			0		0			0		0			0		0			0		0			0		0			0		0			0		0			0
	0			0		0			0		0			0		0			0		0			0		0			0		0			0		0			0		0			0		0			0
	0			0		0			0		0			0		0			0		0			0		0			0		0			0		0			0		0			0		0			0
	0			0		0			0		0			0		0			0		0			0		0			0		0			0		0			0		0			0		0			0
	0			0		0			0		0			0		0			0		0			0		0			0		0			0		0			0		0			0		0			0
	0			0		0			0		0			0		0			0		0			0		0			0		0			0		0			0		0			0		0			0
	0			0		0			0		0			0		0			0		0			0		0			0		0			0		0			0		0			0		0			0
	0			0		0			0		0			0		0			0		0			0		0			0		0			0		0			0		0			0		0			0
	0			0		0			0		0			0		0			0		0			0		0			0		0			0		0			0		0			0		0			0
	0			0		0			0		0			0		0			0		0			0		0			0		0			0		0			0		0			0		0			0
	0			0		0			0		0			0		0			0		0			0		0			0		0			0		0			0		0			0		0			0
	0			0		0			0		0			0		0			0		0			0		0			0		0			0		0			0		0			0		0			0
	0			0		0			0		0			0		0			0		0			0		0			0		0			0		0			0		0			0		0			0
	0			0		0			0		0			0		0			0		0			0		0			0		0			0		0			0		0			0		0			0
	0			0		0			0		0			0		0			0		0			0		0			0		0			0		0			0		0			0		0			0
	0			0		0			0		0			0		0			0		0			0		0			0		0			0		0			0		0			0		0			0
	0			0		0			0		0			0		0			0		0			0		0			0		0			0		0			0		0			0		0			0
	0			0		0			0		0			0		0			0		0			0		0			0		0			0		0			0		0			0		0			0
	0			0		0			0		0			0		0			0		0			0		0			0		0			0		0			0		0			0		0			0
	0			0		0			0		0			0		0			0		0			0		0			0		0			0		0			0		0			0		0			0
	0			0		0			0		0			0		0			0		0			0		0			0		0			0		0			0		0			0		0			0
	0			0		0			0		0			0		0			0		0			0		0			0		0			0		0			0		0			0		0			0
	0			0		0			0		0			0		0			0		0			0		0			0		0			0		0			0		0			0		0			0
	0			0		0			0		0			0		0			0		0			0		0			0		0			0		0			0		0			0		0			0
	0			0		0			0		0			0		0			0		0			0		0			0		0			0		0			0		0			0		0			0
	0			0		0			0		0			0		0			0		0			0		0			0		0			0		0			0		0			0		0			0
	0			0		0			0		0			0		0			0		0			0		0			0		0			0		0			0		0			0		0			0
	0			0		0			0		0			0		0			0		0			0		0			0		0			0		0			0		0			0		0			0
	0			0		0			0		0			0		0			0		0			0		0			0		0			0		0			0		0			0		0			0
	0			0		0			0		0			0		0			0		0			0		0			0		0			0		0			0		0			0		0			0
	0			0		0			0		0			0		0			0		0			0		0			0		0			0		0			0		0			0		0			0
	0			0		0			0		0			0		0			0		0			0		0			0		0			0		0			0		0			0		0			0
	0			0		0			0		0			0		0			0		0			0		0			0		0			0		0			0		0			0		0			0
	0			0		0			0		0			0		0			0		0			0		0			0		0			0		0			0		0			0		0			0
	0			0		0			0		0			0		0			0		0			0		0			0		0			0		0			0		0			0		0			0
	0			0		0			0		0			0		0			0		0			0		0			0		0			0		0			0		0			0		0			0
	0			0		0			0		0			0		0			0		0			0		0			0		0			0		0			0		0			0		0			0
	0			0		0			0		0			0		0			0		0			0		0			0		0			0		0			0		0			0		0			0
	0			0		0			0		0			0		0			0		0			0		0			0		0			0		0			0		0			0		0			0
	0			0		0			0		0			0		0			0		0			0		0			0		0			0		0			0		0			0		0			0
	0			0		0			0		0			0		0			0		0			0		0			0		0			0		0			0		0			0		0			0
	0			0		0			0		0			0		0			0		0			0		0			0		0			0		0			0		0			0		0			0
	0			0		0			0		0			0		0			0		0			0		0			0		0			0		0			0		0			0		0			0
	0			0		0			0		0			0		0			0		0			0		0			0		0			0		0			0		0			0		0			0
	0			0		0			0		0			0		0			0		0			0		0			0		0			0		0			0		0			0		0			0
	0			0		0			0		0			0		0			0		0			0		0			0		0			0		0			0		0			0		0			0
	0			0		0			0		0			0		0			0		0			0		0			0		0			0		0			0		0			0		0			0
	0			0		0			0		0			0		0			0		0			0		0			0		0			0		0			0		0			0		0			0
	0			0		0			0		0			0		0			0		0			0		0			0		0			0		0			0		0			0		0			0
	0			0		0			0		0			0		0			0		0			0		0			0		0			0		0			0		0			0		0			0
	0			0		0			0		0			0		0			0		0			0		0			0		0			0		0			0		0			0		0			0
	0			0		0			0		0			0		0			0		0			0		0			0		0			0		0			0		0			0		0			0
	0			0		0			0		0			0		0			0		0			0		0			0		0			0		0			0		0			0		0			0
	0			0		0			0		0			0		0			0		0			0		0			0		0			0		0			0		0			0		0			0
	0			0		0			0		0			0		0			0		0			0		0			0		0			0		0			0		0			0		0			0
	0			0		0			0		0			0		0			0		0			0		0			0		0			0		0			0		0			0		0			0
	0			0		0			0		0			0		0			0		0			0		0			0		0			0		0			0		0			0		0			0
	0			0		0			0		0			0		0			0		0			0		0			0		0			0		0			0		0			0		0			0
	0			0		0			0		0			0		0			0		0			0		0			0		0			0		0			0		0			0		0			0
	0			0		0			0		0			0		0			0		0			0		0			0		0			0		0			0		0			0		0			0
	0			0		0			0		0			0		0			0		0			0		0			0		0			0		0			0		0			0		0			0
	0			0		0			0		0			0		0			0		0			0		0			0		0			0		0			0		0			0		0			0
	0			0		0			0		0			0		0			0		0			0		0			0		0			0		0			0		0			0		0			0
	0			0		0			0		0			0		0			0		0			0		0			0		0			0		0			0		0			0		0			0
	0			0		0			0		0			0		0			0		0			0		0			0		0			0		0			0		0			0		0			0
	0			0		0			0		0			0		0			0		0			0		0			0		0			0		0			0		0			0		0			0
	0			0		0			0		0			0		0			0		0			0		0			0		0			0		0			0		0			0		0			0
	0			0		0			0		0			0		0			0		0			0		0			0		0			0		0			0		0			0		0			0
	0			0		0			0		0			0		0			0		0			0		0			0		0			0		0			0		0			0		0			0
	0			0		0			0		0			0		0			0		0			0		0			0		0			0		0			0		0			0		0			0
	0			0		0			0		0			0		0			0		0			0		0			0		0			0		0			0		0			0		0			0
	0			0		0			0		0			0		0			0		0			0		0			0		0			0		0			0		0			0		0			0
	0			0		0			0		0			0		0			0		0			0		0			0		0			0		0			0		0			0		0			0
	0			0		0			0		0			0		0			0		0			0		0			0		0			0		0			0		0			0		0			0
	0			0		0			0		0			0		0			0		0			0		0			0		0			0		0			0		0			0		0			0
	0			0		0			0		0			0		0			0		0			0		0			0		0			0		0			0		0			0		0			0
	0			0		0			0		0			0		0			0		0			0		0			0		0			0		0			0		0			0		0			0
	0			0		0			0		0			0		0			0		0			0		0			0		0			0		0			0		0			0		0			0
	0			0		0			0		0			0		0			0		0			0		0			0		0			0		0			0		0			0		0			0
	0			0		0			0		0			0		0			0		0			0		0			0		0			0		0			0		0			0		0			0
	0			0		0			0		0			0		0			0		0			0		0			0		0			0		0			0		0			0		0			0
	0			0		0			0		0			0		0			0		0			0		0			0		0			0		0			0		0			0		0			0
	0			0		0			0		0			0		0			0		0			0		0			0		0			0		0			0		0			0		0			0
	0			0		0			0		0			0		0			0		0			0		0			0		0			0		0			0		0			0		0			0
	0			0		0			0		0			0		0			0		0			0		0			0		0			0		0			0		0			0		0			0
	0			0		0			0		0			0		0			0		0			0		0			0		0			0		0			0		0			0		0			0
	0			0		0			0		0			0		0			0		0			0		0			0		0			0		0			0		0			0		0			0
	0			0		0			0		0			0		0			0		0			0		0			0		0			0		0			0		0			0		0			0
	0			0		0			0		0			0		0			0		0			0		0			0		0			0		0			0		0			0		0			0
	0			0		0			0		0			0		0			0		0			0		0			0		0			0		0			0		0			0		0			0
	0			0		0			0		0			0		0			0		0			0		0			0		0			0		0			0		0			0		0			0
	0			0		0			0		0			0		0			0		0			0		0			0		0			0		0			0		0			0		0			0
	0			0		0			0		0			0		0			0		0			0		0			0		0			0		0			0		0			0		0			0
	0			0		0			0		0			0		0			0		0			0		0			0		0			0		0			0		0			0		0			0
	0			0		0			0		0			0		0			0		0			0		0			0		0			0		0			0		0			0		0			0
	0			0		0			0		0			0		0			0		0			0		0			0		0			0		0			0		0			0		0			0
	0			0		0			0		0			0		0			0		0			0		0			0		0			0		0			0		0			0		0			0
	0			0		0			0		0			0		0			0		0			0		0			0		0			0		0			0		0			0		0			0
	0			0		0			0		0			0		0			0		0			0		0			0		0			0		0			0		0			0		0			0
	0			0		0			0		0			0		0			0		0			0		0			0		0			0		0			0		0			0		0			0
	0			0		0			0		0			0		0			0		0			0		0			0		0			0		0			0		0			0		0			0
	0			0		0			0		0			0		0			0		0			0		0			0		0			0		0			0		0			0		0			0
	0			0		0			0		0			0		0			0		0			0		0			0		0			0		0			0		0			0		0			0
	0			0		0			0		0			0		0			0		0			0		0			0		0			0		0			0		0			0		0			0
	0			0		0			0		0			0		0			0		0			0		0			0		0			0		0			0		0			0		0			0
	0			0		0			0		0			0		0			0		0			0		0			0		0			0		0			0		0			0		0			0
	0			0		0			0		0			0		0			0		0			0		0			0		0			0		0			0		0			0		0			0
	0			0		0			0		0			0		0			0		0			0		0			0		0			0		0			0		0			0		0			0
	0			0		0			0		0			0		0			0		0			0		0			0		0			0		0			0		0			0		0			0
	0			0		0			0		0			0		0			0		0			0		0			0		0			0		0			0		0			0		0			0
	0			0		0			0		0			0		0			0		0			0		0			0		0			0		0			0		0			0		0			0
	0			0		0			0		0			0		0			0		0			0		0			0		0			0		0			0		0			0		0			0
	0			0		0			0		0			0		0			0		0			0		0			0		0			0		0			0		0			0		0			0
	0			0		0			0		0			0		0			0		0			0		0			0		0			0		0			0		0			0		0			0
	0			0		0			0		0			0		0			0		0			0		0			0		0			0		0			0		0			0		0			0
	0			0		0			0		0			0		0			0		0			0		0			0		0			0		0			0		0			0		0			0
	0			0		0			0		0			0		0			0		0			0		0			0		0			0		0			0		0			0		0			0
	0			0		0			0		0			0		0			0		0			0		0			0		0			0		0			0		0			0		0			0
	0			0		0			0		0			0		0			0		0			0		0			0		0			0		0			0		0			0		0			0
	0			0		0			0		0			0		0			0		0			0		0			0		0			0		0			0		0			0		0			0
	0			0		0			0		0			0		0			0		0			0		0			0		0			0		0			0		0			0		0			0
	0			0		0			0		0			0		0			0		0			0		0			0		0			0		0			0		0			0		0			0
	0			0		0			0		0			0		0			0		0			0		0			0		0			0		0			0		0			0		0			0
	0			0		0			0		0			0		0			0		0			0		0			0		0			0		0			0		0			0		0			0
	0			0		0			0		0			0		0			0		0			0		0			0		0			0		0			0		0			0		0			0
	0			0		0			0		0			0		0			0		0			0		0			0		0			0		0			0		0			0		0			0
	0			0		0			0		0			0		0			0		0			0		0			0		0			0		0			0		0			0		0			0
	0			0		0			0		0			0		0			0		0			0		0			0		0			0		0			0		0			0		0			0
	0			0		0			0		0			0		0			0		0			0		0			0		0			0		0			0		0			0		0			0
	0			0		0			0		0			0		0			0		0			0		0			0		0			0		0			0		0			0		0			0
	0			0		0			0		0			0		0			0		0			0		0			0		0			0		0			0		0			0		0			0
	0			0		0			0		0			0		0			0		0			0		0			0		0			0		0			0		0			0		0			0
	0			0		0			0		0			0		0			0		0			0		0			0		0			0		0			0		0			0		0			0
	0			0		0			0		0			0		0			0		0			0		0			0		0			0		0			0		0			0		0			0
	0			0		0			0		0			0		0			0		0			0		0			0		0			0		0			0		0			0		0			0
	0			0		0			0		0			0		0			0		0			0		0			0		0			0		0			0		0			0		0			0
	0			0		0			0		0			0		0			0		0			0		0			0		0			0		0			0		0			0		0			0
	0			0		0			0		0			0		0			0		0			0		0			0		0			0		0			0		0			0		0			0
	0			0		0			0		0			0		0			0		0			0		0			0		0			0		0			0		0			0		0			0
	0			0		0			0		0			0		0			0		0			0		0			0		0			0		0			0		0			0		0			0
	0			0		0			0		0			0		0			0		0			0		0			0		0			0		0			0		0			0		0			0
	0			0		0			0		0			0		0			0		0			0		0			0		0			0		0			0		0			0		0			0
	0			0		0			0		0			0		0			0		0			0		0			0		0			0		0			0		0			0		0			0
	0			0		0			0		0			0		0			0		0			0		0			0		0			0		0			0		0			0		0			0
	0			0		0			0		0			0		0			0		0			0		0			0		0			0		0			0		0			0		0			0
	0			0		0			0		0			0		0			0		0			0		0			0		0			0		0			0		0			0		0			0
	0			0		0			0		0			0		0			0		0			0		0			0		0			0		0			0		0			0		0			0
	0			0		0			0		0			0		0			0		0			0		0			0		0			0		0			0		0			0		0			0
	0			0		0			0		0			0		0			0		0			0		0			0		0			0		0			0		0			0		0			0
	0			0		0			0		0			0		0			0		0			0		0			0		0			0		0			0		0			0		0			0
	0			0		0			0		0			0		0			0		0			0		0			0		0			0		0			0		0			0		0			0
	0			0		0			0		0			0		0			0		0			0		0			0		0			0		0			0		0			0		0			0
	0			0		0			0		0			0		0			0		0			0		0			0		0			0		0			0		0			0		0			0
	0			0		0			0		0			0		0			0		0			0		0			0		0			0		0			0		0			0		0			0
	0			0		0			0		0			0		0			0		0			0		0			0		0			0		0			0		0			0		0			0
	0			0		0			0		0			0		0			0		0			0		0			0		0			0		0			0		0			0		0			0
	0			0		0			0		0			0		0			0		0			0		0			0		0			0		0			0		0			0		0			0
	0			0		0			0		0			0		0			0		0			0		0			0		0			0		0			0		0			0		0			0
	0			0		0			0		0			0		0			0		0			0		0			0		0			0		0			0		0			0		0			0
	0			0		0			0		0			0		0			0		0			0		0			0		0			0		0			0		0			0		0			0
	0			0		0			0		0			0		0			0		0			0		0			0		0			0		0			0		0			0		0			0
	0			0		0			0		0			0		0			0		0			0		0			0		0			0		0			0		0			0		0			0
	0			0		0			0		0			0		0			0		0			0		0			0		0			0		0			0		0			0		0			0
	0			0		0			0		0			0		0			0		0			0		0			0		0			0		0			0		0			0		0			0
	0			0		0			0		0			0		0			0		0			0		0			0		0			0		0			0		0			0		0			0
	0			0		0			0		0			0		0			0		0			0		0			0		0			0		0			0		0			0		0			0
	0			0		0			0		0			0		0			0		0			0		0			0		0			0		0			0		0			0		0			0
	0			0		0			0		0			0		0			0		0			0		0			0		0			0		0			0		0			0		0			0
	0			0		0			0		0			0		0			0		0			0		0			0		0			0		0			0		0			0		0			0
	0			0		0			0		0			0		0			0		0			0		0			0		0			0		0			0		0			0		0			0
	0			0		0			0		0			0		0			0		0			0		0			0		0			0		0			0		0			0		0			0
	0			0		0			0		0			0		0			0		0			0		0			0		0			0		0			0		0			0		0			0
	0			0		0			0		0			0		0			0		0			0		0			0		0			0		0			0		0			0		0			0
	0			0		0			0		0			0		0			0		0			0		0			0		0			0		0			0		0			0		0			0
	0			0		0			0		0			0		0			0		0			0		0			0		0			0		0			0		0			0		0			0
	0			0		0			0		0			0		0			0		0			0		0			0		0			0		0			0		0			0		0			0
	0			0		0			0		0			0		0			0		0			0		0			0		0			0		0			0		0			0		0			0
	0			0		0			0		0			0		0			0		0			0		0			0		0			0		0			0		0			0		0			0
	0			0		0			0		0			0		0			0		0			0		0			0		0			0		0			0		0			0		0			0
	0			0		0			0		0			0		0			0		0			0		0			0		0			0		0			0		0			0		0			0
	0			0		0			0		0			0		0			0		0			0		0			0		0			0		0			0		0			0		0			0
	0			0		0			0		0			0		0			0		0			0		0			0		0			0		0			0		0			0		0			0
	0			0		0			0		0			0		0			0		0			0		0			0		0			0		0			0		0			0		0			0
	0			0		0			0		0			0		0			0		0			0		0			0		0			0		0			0		0			0		0			0
	0			0		0			0		0			0		0			0		0			0		0			0		0			0		0			0		0			0		0			0
	0			0		0			0		0			0		0			0		0			0		0			0		0			0		0			0		0			0		0			0
	0			0		0			0		0			0		0			0		0			0		0			0		0			0		0			0		0			0		0			0
	0			0		0			0		0			0		0			0		0			0		0			0		0			0		0			0		0			0		0			0
	0			0		0			0		0			0		0			0		0			0		0			0		0			0		0			0		0			0		0			0
	0			0		0			0		0			0		0			0		0			0		0			0		0			0		0			0		0			0		0			0
	0			0		0			0		0			0		0			0		0			0		0			0		0			0		0			0		0			0		0			0
	0			0		0			0		0			0		0			0		0			0		0			0		0			0		0			0		0			0		0			0
	0			0		0			0		0			0		0			0		0			0		0			0		0			0		0			0		0			0		0			0
	0			0		0			0		0			0		0			0		0			0		0			0		0			0		0			0		0			0		0			0
	0			0		0			0		0			0		0			0		0			0		0			0		0			0		0			0		0			0		0			0
	0			0		0			0		0			0		0			0		0			0		0			0		0			0		0			0		0			0		0			0
	0			0		0			0		0			0		0			0		0			0		0			0		0			0		0			0		0			0		0			0
	0			0		0			0		0			0		0			0		0			0		0			0		0			0		0			0		0			0		0			0
	0			0		0			0		0			0		0			0		0			0		0			0		0			0		0			0		0			0		0			0
	0			0		0			0		0			0		0			0		0			0		0			0		0			0		0			0		0			0		0			0
	0			0		0			0		0			0		0			0		0			0		0			0		0			0		0			0		0			0		0			0
	0			0		0			0		0			0		0			0		0			0		0			0		0			0		0			0		0			0		0			0
	0			0		0			0		0			0		0			0		0			0		0			0		0			0		0			0		0			0		0			0
	0			0		0			0		0			0		0			0		0			0		0			0		0			0		0			0		0			0		0			0
	0			0		0			0		0			0		0			0		0			0		0			0		0			0		0			0		0			0		0			0
	0			0		0			0		0			0		0			0		0			0		0			0		0			0		0			0		0			0		0			0
	0			0		0			0		0			0		0			0		0			0		0			0		0			0		0			0		0			0		0			0
	0			0		0			0		0			0		0			0		0			0		0			0		0			0		0			0		0			0		0			0
	0			0		0			0		0			0		0			0		0			0		0			0		0			0		0			0		0			0		0			0
	0			0		0			0		0			0		0			0		0			0		0			0		0			0		0			0		0			0		0			0
	0			0		0			0		0			0		0			0		0			0		0			0		0			0		0			0		0			0		0			0
	0			0		0			0		0			0		0			0		0			0		0			0		0			0		0			0		0			0		0			0
	0			0		0			0		0			0		0			0		0			0		0			0		0			0		0			0		0			0		0			0
	0			0		0			0		0			0		0			0		0			0		0			0		0			0		0			0		0			0		0			0
	0			0		0			0		0			0		0			0		0			0		0			0		0			0		0			0		0			0		0			0
	0			0		0			0		0			0		0			0		0			0		0			0		0			0		0			0		0			0		0			0
	0			0		0			0		0			0		0			0		0			0		0			0		0			0		0			0		0			0		0			0
	0			0		0			0		0			0		0			0		0			0		0			0		0			0		0			0		0			0		0			0
	0			0		0			0		0			0		0			0		0			0		0			0		0			0		0			0		0			0		0			0
	0			0		0			0		0			0		0			0		0			0		0			0		0			0		0			0		0			0		0			0
	0			0		0			0		0			0		0			0		0			0		0			0		0			0		0			0		0			0		0			0
	0			0		0			0		0			0		0			0		0			0		0			0		0			0		0			0		0			0		0			0
	0			0		0			0		0			0		0			0		0			0		0			0		0			0		0			0		0			0		0			0
	0			0		0			0		0			0		0			0		0			0		0			0		0			0		0			0		0			0		0			0
	0			0		0			0		0			0		0			0		0			0		0			0		0			0		0			0		0			0		0			0
	0			0		0			0		0			0		0			0		0			0		0			0		0			0		0			0		0			0		0			0
	0			0		0			0		0			0		0			0		0			0		0			0		0			0		0			0		0			0		0			0
	0			0		0			0		0			0		0			0		0			0		0			0		0			0		0			0		0			0		0			0
	0			0		0			0		0			0		0			0		0			0		0			0		0			0		0			0		0			0		0			0
	0			0		0			0		0			0		0			0		0			0		0			0		0			0		0			0		0			0		0			0
	0			0		0			0		0			0		0			0		0			0		0			0		0			0		0			0		0			0		0			0
	0			0		0			0		0			0		0			0		0			0		0			0		0			0		0			0		0			0		0			0
	0			0		0			0		0			0		0			0		0			0		0			0		0			0		0			0		0			0		0			0
	0			0		0			0		0			0		0			0		0			0		0			0		0			0		0			0		0			0		0			0
	0			0		0			0		0			0		0			0		0			0		0			0		0			0		0			0		0			0		0			0
	0			0		0			0		0			0		0			0		0			0		0			0		0			0		0			0		0			0		0			0
	0			0		0			0		0			0		0			0		0			0		0			0		0			0		0			0		0			0		0			0
	0			0		0			0		0			0		0			0		0			0		0			0		0			0		0			0		0			0		0			0
	0			0		0			0		0			0		0			0		0			0		0			0		0			0		0			0		0			0		0			0
	0			0		0			0		0			0		0			0		0			0		0			0		0			0		0			0		0			0		0			0
	0			0		0			0		0			0		0			0		0			0		0			0		0			0		0			0		0			0		0			0
	0			0		0			0		0			0		0			0		0			0		0			0		0			0		0			0		0			0		0			0
	0			0		0			0		0			0		0			0		0			0		0			0		0			0		0			0		0			0		0			0
	0			0		0			0		0			0		0			0		0			0		0			0		0			0		0			0		0			0		0			0
	0			0		0			0		0			0		0			0		0			0		0			0		0			0		0			0		0			0		0			0
	0			0		0			0		0			0		0			0		0			0		0			0		0			0		0			0		0			0		0			0
	0			0		0			0		0			0		0			0		0			0		0			0		0			0		0			0		0			0		0			0
	0			0		0			0		0			0		0			0		0			0		0			0		0			0		0			0		0			0		0			0
	0			0		0			0		0			0		0			0		0			0		0			0		0			0		0			0		0			0		0			0
	0			0		0			0		0			0		0			0		0			0		0			0		0			0		0			0		0			0		0			0
	0			0		0			0		0			0		0			0		0			0		0			0		0			0		0			0		0			0		0			0
	0			0		0			0		0			0		0			0		0			0		0			0		0			0		0			0		0			0		0			0
	0			0		0			0		0			0		0			0		0			0		0			0		0			0		0			0		0			0		0			0
	0			0		0			0		0			0		0			0		0			0		0			0		0			0		0			0		0			0		0			0
	0			0		0			0		0			0		0			0		0			0		0			0		0			0		0			0		0			0		0			0
	0			0		0			0		0			0		0			0		0			0		0			0		0			0		0			0		0			0		0			0
	0			0		0			0		0			0		0			0		0			0		0			0		0			0		0			0		0			0		0			0
	0			0		0			0		0			0		0			0		0			0		0			0		0			0		0			0		0			0		0			0
	0			0		0			0		0			0		0			0		0			0		0			0		0			0		0			0		0			0		0			0
	0			0		0			0		0			0		0			0		0			0		0			0		0			0		0			0		0			0		0			0
	0			0		0			0		0			0		0			0		0			0		0			0		0			0		0			0		0			0		0			0
	0			0		0			0		0			0		0			0		0			0		0			0		0			0		0			0		0			0		0			0
	0			0		0			0		0			0		0			0		0			0		0			0		0			0		0			0		0			0		0			0
	0			0		0			0		0			0		0			0		0			0		0			0		0			0		0			0		0			0		0			0
	0			0		0			0		0			0		0			0		0			0		0			0		0			0		0			0		0			0		0			0
	0			0		0			0		0			0		0			0		0			0		0			0		0			0		0			0		0			0		0			0
	0			0		0			0		0			0		0			0		0			0		0			0		0			0		0			0		0			0		0			0
	0			0		0			0		0			0		0			0		0			0		0			0		0			0		0			0		0			0		0			0
	0			0		0			0		0			0		0			0		0			0		0			0		0			0		0			0		0			0		0			0
	0			0		0			0		0			0		0			0		0			0		0			0		0			0		0			0		0			0		0			0
	0			0		0			0		0			0		0			0		0			0		0			0		0			0		0			0		0			0		0			0
	0			0		0			0		0			0		0			0		0			0		0			0		0			0		0			0		0			0		0			0
	0			0		0			0		0			0		0			0		0			0		0			0		0			0		0			0		0			0		0			0
	0			0		0			0		0			0		0			0		0			0		0			0		0			0		0			0		0			0		0			0
	0			0		0			0		0			0		0			0		0			0		0			0		0			0		0			0		0			0		0			0
	0			0		0			0		0			0		0			0		0			0		0			0		0			0		0			0		0			0		0			0
	0			0		0			0		0			0		0			0		0			0		0			0		0			0		0			0		0			0		0			0
	0			0		0			0		0			0		0			0		0			0		0			0		0			0		0			0		0			0		0			0
	0			0		0			0		0			0		0			0		0			0		0			0		0			0		0			0		0			0		0			0
	0			0		0			0		0			0		0			0		0			0		0			0		0			0		0			0		0			0		0			0
	0			0		0			0		0			0		0			0		0			0		0			0		0			0		0			0		0			0		0			0
	0			0		0			0		0			0		0			0		0			0		0			0		0			0		0			0		0			0		0			0
	0			0		0			0		0			0		0			0		0			0		0			0		0			0		0			0		0			0		0			0
	0			0		0			0		0			0		0			0		0			0		0			0		0			0		0			0		0			0		0			0
	0			0		0			0		0			0		0			0		0			0		0			0		0			0		0			0		0			0		0			0
	0			0		0			0		0			0		0			0		0			0		0			0		0			0		0			0		0			0		0			0
	0			0		0			0		0			0		0			0		0			0		0			0		0			0		0			0		0			0		0			0
	0			0		0			0		0			0		0			0		0			0		0			0		0			0		0			0		0			0		0			0
	0			0		0			0		0			0		0			0		0			0		0			0		0			0		0			0		0			0		0			0
	0			0		0			0		0			0		0			0		0			0		0			0		0			0		0			0		0			0		0			0
	0			0		0			0		0			0		0			0		0			0		0			0		0			0		0			0		0			0		0			0
	0			0		0			0		0			0		0			0		0			0		0			0		0			0		0			0		0			0		0			0
	0			0		0			0		0			0		0			0		0			0		0			0		0			0		0			0		0			0		0			0
	0			0		0			0		0			0		0			0		0			0		0			0		0			0		0			0		0			0		0			0
	0			0		0			0		0			0		0			0		0			0		0			0		0			0		0			0		0			0		0			0
	0			0		0			0		0			0		0			0		0			0		0			0		0			0		0			0		0			0		0			0
	0			0		0			0		0			0		0			0		0			0		0			0		0			0		0			0		0			0		0			0
	0			0		0			0		0			0		0			0		0			0		0			0		0			0		0			0		0			0		0			0
	0			0		0			0		0			0		0			0		0			0		0			0		0			0		0			0		0			0		0			0
	0			0		0			0		0			0		0			0		0			0		0			0		0			0		0			0		0			0		0			0
	0			0		0			0		0			0		0			0		0			0		0			0		0			0		0			0		0			0		0			0
	0			0		0			0		0			0		0			0		0			0		0			0		0			0		0			0		0			0		0			0
	0			0		0			0		0			0		0			0		0			0		0			0		0			0		0			0		0			0		0			0
	0			0		0			0		0			0		0			0		0			0		0			0		0			0		0			0		0			0		0			0
	0			0		0			0		0			0		0			0		0			0		0			0		0			0		0			0		0			0		0			0
	0			0		0			0		0			0		0			0		0			0		0			0		0			0		0			0		0			0		0			0
	0			0		0			0		0			0		0			0		0			0		0			0		0			0		0			0		0			0		0			0
	0			0		0			0		0			0		0			0		0			0		0			0		0			0		0			0		0			0		0			0
	0			0		0			0		0			0		0			0		0			0		0			0		0			0		0			0		0			0		0			0
	0			0		0			0		0			0		0			0		0			0		0			0		0			0		0			0		0			0		0			0
	0			0		0			0		0			0		0			0		0			0		0			0		0			0		0			0		0			0		0			0
	0			0		0			0		0			0		0			0		0			0		0			0		0			0		0			0		0			0		0			0
	0			0		0			0		0			0		0			0		0			0		0			0		0			0		0			0		0			0		0			0
	0			0		0			0		0			0		0			0		0			0		0			0		0			0		0			0		0			0		0			0
	0			0		0			0		0			0		0			0		0			0		0			0		0			0		0			0		0			0		0			0
	0			0		0			0		0			0		0			0		0			0		0			0		0			0		0			0		0			0		0			0
	0			0		0			0		0			0		0			0		0			0		0			0		0			0		0			0		0			0		0			0
	0			0		0			0		0			0		0			0		0			0		0			0		0			0		0			0		0			0		0			0
	0			0		0			0		0			0		0			0		0			0		0			0		0			0		0			0		0			0		0			0
	0			0		0			0		0			0		0			0		0			0		0			0		0			0		0			0		0			0		0			0
	0			0		0			0		0			0		0			0		0			0		0			0		0			0		0			0		0			0		0			0
	0			0		0			0		0			0		0			0		0			0		0			0		0			0		0			0		0			0		0			0
	0			0		0			0		0			0		0			0		0			0		0			0		0			0		0			0		0			0		0			0
	0			0		0			0		0			0		0			0		0			0		0			0		0			0		0			0		0			0		0			0
	0			0		0			0		0			0		0			0		0			0		0			0		0			0		0			0		0			0		0			0
	0			0		0			0		0			0		0			0		0			0		0			0		0			0		0			0		0			0		0			0
	0			0		0			0		0			0		0			0		0			0		0			0		0			0		0			0		0			0		0			0
	0			0		0			0		0			0		0			0		0			0		0			0		0			0		0			0		0			0		0			0
	0			0		0			0		0			0		0			0		0			0		0			0		0			0		0			0		0			0		0			0
	0			0		0			0		0			0		0			0		0			0		0			0		0			0		0			0		0			0		0			0
	0			0		0			0		0			0		0			0		0			0		0			0		0			0		0			0		0			0		0			0
	0			0		0			0		0			0		0			0		0			0		0			0		0			0		0			0		0			0		0			0
	0			0		0			0		0			0		0			0		0			0		0			0		0			0		0			0		0			0		0			0
	0			0		0			0		0			0		0			0		0			0		0			0		0			0		0			0		0			0		0			0
	0			0		0			0		0			0		0			0		0			0		0			0		0			0		0			0		0			0		0			0
	0			0		0			0		0			0		0			0		0			0		0			0		0			0		0			0		0			0		0			0
	0			0		0			0		0			0		0			0		0			0		0			0		0			0		0			0		0			0		0			0
	0			0		0			0		0			0		0			0		0			0		0			0		0			0		0			0		0			0		0			0
	0			0		0			0		0			0		0			0		0			0		0			0		0			0		0			0		0			0		0			0
	0			0		0			0		0			0		0			0		0			0		0			0		0			0		0			0		0			0		0			0
	0			0		0			0		0			0		0			0		0			0		0			0		0			0		0			0		0			0		0			0
	0			0		0			0		0			0		0			0		0			0		0			0		0			0		0			0		0			0		0			0
	0			0		0			0		0			0		0			0		0			0		0			0		0			0		0			0		0			0		0			0
	0			0		0			0		0			0		0			0		0			0		0			0		0			0		0			0		0			0		0			0
	0			0		0			0		0			0		0			0		0			0		0			0		0			0		0			0		0			0		0			0
	0			0		0			0		0			0		0			0		0			0		0			0		0			0		0			0		0			0		0			0
	0			0		0			0		0			0		0			0		0			0		0			0		0			0		0			0		0			0		0			0
	0			0		0			0		0			0		0			0		0			0		0			0		0			0		0			0		0			0		0			0
	0			0		0			0		0			0		0			0		0			0		0			0		0			0		0			0		0			0		0			0
	0			0		0			0		0			0		0			0		0			0		0			0		0			0		0			0		0			0		0			0
	0			0		0			0		0			0		0			0		0			0		0			0		0			0		0			0		0			0		0			0
	0			0		0			0		0			0		0			0		0			0		0			0		0			0		0			0		0			0		0			0
	0			0		0			0		0			0		0			0		0			0		0			0		0			0		0			0		0			0		0			0
	0			0		0			0		0			0		0			0		0			0		0			0		0			0		0			0		0			0		0			0
	0			0		0			0		0			0		0			0		0			0		0			0		0			0		0			0		0			0		0			0
	0			0		0			0		0			0		0			0		0			0		0			0		0			0		0			0		0			0		0			0
	0			0		0			0		0			0		0			0		0			0		0			0		0			0		0			0		0			0		0			0
	0			0		0			0		0			0		0			0		0			0		0			0		0			0		0			0		0			0		0			0
	0			0		0			0		0			0		0			0		0			0		0			0		0			0		0			0		0			0		0			0
	0			0		0			0		0			0		0			0		0			0		0			0		0			0		0			0		0			0		0			0
	0			0		0			0		0			0		0			0		0			0		0			0		0			0		0			0		0			0		0			0
	0			0		0			0		0			0		0			0		0			0		0			0		0			0		0			0		0			0		0			0
	0			0		0			0		0			0		0			0		0			0		0			0		0			0		0			0		0			0		0			0
	0			0		0			0		0			0		0			0		0			0		0			0		0			0		0			0		0			0		0			0
	0			0		0			0		0			0		0			0		0			0		0			0		0			0		0			0		0			0		0			0
	0			0		0			0		0			0		0			0		0			0		0			0		0			0		0			0		0			0		0			0
	0			0		0			0		0			0		0			0		0			0		0			0		0			0		0			0		0			0		0			0
	0			0		0			0		0			0		0			0		0			0		0			0		0			0		0			0		0			0		0			0
	0			0		0			0		0			0		0			0		0			0		0			0		0			0		0			0		0			0		0			0
	0			0		0			0		0			0		0			0		0			0		0			0		0			0		0			0		0			0		0			0
	0			0		0			0		0			0		0			0		0			0		0			0		0			0		0			0		0			0		0			0
	0			0		0			0		0			0		0			0		0			0		0			0		0			0		0			0		0			0		0			0
	0			0		0			0		0			0		0			0		0			0		0			0		0			0		0			0		0			0		0			0
	0			0		0			0		0			0		0			0		0			0		0			0		0			0		0			0		0			0		0			0
	0			0		0			0		0			0		0			0		0			0		0			0		0			0		0			0		0			0		0			0
	0			0		0			0		0			0		0			0		0			0		0			0		0			0		0			0		0			0		0			0
	0			0		0			0		0			0		0			0		0			0		0			0		0			0		0			0		0			0		0			0
	0			0		0			0		0			0		0			0		0			0		0			0		0			0		0			0		0			0		0			0
	0			0		0			0		0			0		0			0		0			0		0			0		0			0		0			0		0			0		0			0
	0			0		0			0		0			0		0			0		0			0		0			0		0			0		0			0		0			0		0			0
	0			0		0			0		0			0		0			0		0			0		0			0		0			0		0			0		0			0		0			0
	0			0		0			0		0			0		0			0		0			0		0			0		0			0		0			0		0			0		0			0
	0			0		0			0		0			0		0			0		0			0		0			0		0			0		0			0		0			0		0			0
	0			0		0			0		0			0		0			0		0			0		0			0		0			0		0			0		0			0		0			0
	0			0		0			0		0			0		0			0		0			0		0			0		0			0		0			0		0			0		0			0
	0			0		0			0		0			0		0			0		0			0		0			0		0			0		0			0		0			0		0			0
	0			0		0			0		0			0		0			0		0			0		0			0		0			0		0			0		0			0		0			0
	0			0		0			0		0			0		0			0		0			0		0			0		0			0		0			0		0			0		0			0
	0			0		0			0		0			0		0			0		0			0		0			0		0			0		0			0		0			0		0			0
	0			0		0			0		0			0		0			0		0			0		0			0		0			0		0			0		0			0		0			0
	0			0		0			0		0			0		0			0		0			0		0			0		0			0		0			0		0			0		0			0
	0			0		0			0		0			0		0			0		0			0		0			0		0			0		0			0		0			0		0			0
	0			0		0			0		0			0		0			0		0			0		0			0		0			0		0			0		0			0		0			0
	0			0		0			0		0			0		0			0		0			0		0			0		0			0		0			0		0			0		0			0
	0			0		0			0		0			0		0			0		0			0		0			0		0			0		0			0		0			0		0			0
	0			0		0			0		0			0		0			0		0			0		0			0		0			0		0			0		0			0		0			0
	0			0		0			0		0			0		0			0		0			0		0			0		0			0		0			0		0			0		0			0
	0			0		0			0		0			0		0			0		0			0		0			0		0			0		0			0		0			0		0			0
	0			0		0			0		0			0		0			0		0			0		0			0		0			0		0			0		0			0		0			0
	0			0		0			0		0			0		0			0		0			0		0			0		0			0		0			0		0			0		0			0
	0			0		0			0		0			0		0			0		0			0		0			0		0			0		0			0		0			0		0			0
	0			0		0			0		0			0		0			0		0			0		0			0		0			0		0			0		0			0		0			0
	0			0		0			0		0			0		0			0		0			0		0			0		0			0		0			0		0			0		0			0
	0			0		0			0		0			0		0			0		0			0		0			0		0			0		0			0		0			0		0			0
	0			0		0			0		0			0		0			0		0			0		0			0		0			0		0			0		0			0		0			0
	0			0		0			0		0			0		0			0		0			0		0			0		0			0		0			0		0			0		0			0
	0			0		0			0		0			0		0			0		0			0		0			0		0			0		0			0		0			0		0			0
	0			0		0			0		0			0		0			0		0			0		0			0		0			0		0			0		0			0		0			0
	0			0		0			0		0			0		0			0		0			0		0			0		0			0		0			0		0			0		0			0
	0			0		0			0		0			0		0			0		0			0		0			0		0			0		0			0		0			0		0			0
	0			0		0			0		0			0		0			0		0			0		0			0		0			0		0			0		0			0		0			0
	0			0		0			0		0			0		0			0		0			0		0			0		0			0		0			0		0			0		0			0
	0			0		0			0		0			0		0			0		0			0		0			0		0			0		0			0		0			0		0			0
	0			0		0			0		0			0		0			0		0			0		0			0		0			0		0			0		0			0		0			0
	0			0		0			0		0			0		0			0		0			0		0			0		0			0		0			0		0			0		0			0
	0			0		0			0		0			0		0			0		0			0		0			0		0			0		0			0		0			0		0			0
	0			0		0			0		0			0		0			0		0			0		0			0		0			0		0			0		0			0		0			0
	0			0		0			0		0			0		0			0		0			0		0			0		0			0		0			0		0			0		0			0
	0			0		0			0		0			0		0			0		0			0		0			0		0			0		0			0		0			0		0			0
	0			0		0			0		0			0		0			0		0			0		0			0		0			0		0			0		0			0		0			0
	0			0		0			0		0			0		0			0		0			0		0			0		0			0		0			0		0			0		0			0
	0			0		0			0		0			0		0			0		0			0		0			0		0			0		0			0		0			0		0			0
	0			0		0			0		0			0		0			0		0			0		0			0		0			0		0			0		0			0		0			0
	0			0		0			0		0			0		0			0		0			0		0			0		0			0		0			0		0			0		0			0
	0			0		0			0		0			0		0			0		0			0		0			0		0			0		0			0		0			0		0			0
	0			0		0			0		0			0		0			0		0			0		0			0		0			0		0			0		0			0		0			0
	0			0		0			0		0			0		0			0		0			0		0			0		0			0		0			0		0			0		0			0
	0			0		0			0		0			0		0			0		0			0		0			0		0			0		0			0		0			0		0			0
	0			0		0			0		0			0		0			0		0			0		0			0		0			0		0			0		0			0		0			0
	0			0		0			0		0			0		0			0		0			0		0			0		0			0		0			0		0			0		0			0
	0			0		0			0		0			0		0			0		0			0		0			0		0			0		0			0		0			0		0			0
	0			0		0			0		0			0		0			0		0			0		0			0		0			0		0			0		0			0		0			0
	0			0		0			0		0			0		0			0		0			0		0			0		0			0		0			0		0			0		0			0
	0			0		0			0		0			0		0			0		0			0		0			0		0			0		0			0		0			0		0			0
	0			0		0			0		0			0		0			0		0			0		0			0		0			0		0			0		0			0		0			0
	0			0		0			0		0			0		0			0		0			0		0			0		0			0		0			0		0			0		0			0
	0			0		0			0		0			0		0			0		0			0		0			0		0			0		0			0		0			0		0			0
	0			0		0			0		0			0		0			0		0			0		0			0		0			0		0			0		0			0		0			0
	0			0		0			0		0			0		0			0		0			0		0			0		0			0		0			0		0			0		0			0
	0			0		0			0		0			0		0			0		0			0		0			0		0			0		0			0		0			0		0			0
	0			0		0			0		0			0		0			0		0			0		0			0		0			0		0			0		0			0		0			0
	0			0		0			0		0			0		0			0		0			0		0			0		0			0		0			0		0			0		0			0
	0			0		0			0		0			0		0			0		0			0		0			0		0			0		0			0		0			0		0			0
	0			0		0			0		0			0		0			0		0			0		0			0		0			0		0			0		0			0		0			0
	0			0		0			0		0			0		0			0		0			0		0			0		0			0		0			0		0			0		0			0
	0			0		0			0		0			0		0			0		0			0		0			0		0			0		0			0		0			0		0			0
	0			0		0			0		0			0		0			0		0			0		0			0		0			0		0			0		0			0		0			0
	0			0		0			0		0			0		0			0		0			0		0			0		0			0		0			0		0			0		0			0
	0			0		0			0		0			0		0			0		0			0		0			0		0			0		0			0		0			0		0			0
	0			0		0			0		0			0		0			0		0			0		0			0		0			0		0			0		0			0		0			0
	0			0		0			0		0			0		0			0		0			0		0			0		0			0		0			0		0			0		0			0
	0			0		0			0		0			0		0			0		0			0		0			0		0			0		0			0		0			0		0			0
	0			0		0			0		0			0		0			0		0			0		0			0		0			0		0			0		0			0		0			0
	0			0		0			0		0			0		0			0		0			0		0			0		0			0		0			0		0			0		0			0
	0			0		0			0		0			0		0			0		0			0		0			0		0			0		0			0		0			0		0			0
	0			0		0			0		0			0		0			0		0			0		0			0		0			0		0			0		0			0		0			0
	0			0		0			0		0			0		0			0		0			0		0			0		0			0		0			0		0			0		0			0
	0			0		0			0		0			0		0			0		0			0		0			0		0			0		0			0		0			0		0			0
	0			0		0			0		0			0		0			0		0			0		0			0		0			0		0			0		0			0		0			0
	0			0		0			0		0			0		0			0		0			0		0			0		0			0		0			0		0			0		0			0
	0			0		0			0		0			0		0			0		0			0		0			0		0			0		0			0		0			0		0			0
	0			0		0			0		0			0		0			0		0			0		0			0		0			0		0			0		0			0		0			0
	0			0		0			0		0			0		0			0		0			0		0			0		0			0		0			0		0			0		0			0
	0			0		0			0		0			0		0			0		0			0		0			0		0			0		0			0		0			0		0			0
	0			0		0			0		0			0		0			0		0			0		0			0		0			0		0			0		0			0		0			0
	0			0		0			0		0			0		0			0		0			0		0			0		0			0		0			0		0			0		0			0

## Sheet: raw data_prim cell PDMS 400kPa
		2021-06-02 T cell 2-1 soft PDMS lamellpodium spot1					2021-06-02 T cell 2-1 soft PDMS lamellpodium spot2					2021-06-02 T cell 2-1 soft PDMS lamellpodium spot3					2021-06-02 T cell 3-1 soft PDMS lamellpodium spot1					2021-06-02 T cell 3-1 soft PDMS lamellpodium spot2					2021-06-02 T cell 3-1 soft PDMS lamellpodium spot3					2021-06-03 T cell 3-1 soft PDMS lamellpodium spot1					2021-06-03 T cell 3-1 soft PDMS lamellpodium spot2					2021-06-03 T cell 4-1 soft PDMS lamellpodium spot1					2021-06-03 T cell 4-1 soft PDMS lamellpodium spot2
		Average	243.028				Average	214.841				Average	329.366				Average	217.866				Average	255.482				Average	197.681				Average	0.81454				Average	642.183				Average	420.167				Average	481.299
		StDev	119.771				StDev	110.336				StDev	111.049				StDev	72.0218				StDev	87.9112				StDev	88.099				StDev	0.363613				StDev	240.66				StDev	234.144				StDev	311.044
				setp					setp					setp					setp					setp					setp					setp					setp					setp					setp
		kPa	%				kPa	%				kPa	%				kPa	%				kPa	%				kPa	%				MPa	%				kPa	%				kPa	%				kPa	%
	0	0	2.85714	1687.5		0	0	2.08333	961.596		0	0	4	4339.29		0	0	2.5	1186.64		0	0	2.38095	1554.07		0	0	1.5873	620.283		0	0	2.38095	0.015797		0	0	1.85185	7637.01		0	0	0.826446	488.119		0	0	1.5873	732.645
	0	0.865131	0	0		0	0.795523	0	0		0	0.994404	0	0		0	0.686138	0	0		0	0.835299	0	0		0	0.795523	0	0		0	0.00236017	0	0		0	1.51936	0	0		0	1.48248	0	0		0	1.51936	0	0
	0	1.73026	0	0		0	1.59105	0	0		0	1.98881	0	0		0	1.37228	0	0		0	1.6706	0	0		0	1.59105	0	0		0	0.00472034	0	0		0	3.03872	0	0		0	2.96496	0	0		0	3.03872	0	0
	0	2.59539	0	0		0	2.38657	0	0		0	2.98321	0	0		0	2.05842	0	0		0	2.5059	0	0		0	2.38657	0	0		0	0.00708051	0	0		0	4.55808	0	0		0	4.44745	0	0		0	4.55808	0	0
	0	3.46053	0	0		0	3.18209	0	0		0	3.97762	0	0		0	2.74455	0	0		0	3.3412	0	0		0	3.18209	0	0		0	0.00944068	0	0		0	6.07744	0	0		0	5.92993	0	0		0	6.07744	0	0
	0	4.32566	0	0		0	3.97762	0	0		0	4.97202	0	0		0	3.43069	0	0		0	4.1765	0	0		0	3.97762	0	0		0	0.0118008	0	0		0	7.5968	0	0		0	7.41241	0	0		0	7.5968	0	0
	0	5.19079	0	0		0	4.77314	0	0		0	5.96642	0	0		0	4.11683	0	0		0	5.01179	0	0		0	4.77314	0	0		0	0.014161	0	0		0	9.11616	0	0		0	8.89489	0	0		0	9.11616	0	0
	0	6.05592	0	0		0	5.56866	0	0		0	6.96083	0	0		0	4.80297	0	0		0	5.84709	0	0		0	5.56866	0	0		0	0.0165212	0	0		0	10.6355	0	0		0	10.3774	0	0		0	10.6355	0	0
	0	6.92105	0	0		0	6.36418	0	0		0	7.95523	0	0		0	5.48911	0	0		0	6.68239	0	0		0	6.36418	0	0		0	0.0188814	0	0		0	12.1549	0	0		0	11.8598	0	0		0	12.1549	0	0
	0	7.78618	0	0		0	7.15971	0	0		0	8.94963	0	0		0	6.17525	0	0		0	7.51769	0	0		0	7.15971	0	0		0	0.0212415	0	0		0	13.6742	0	0		0	13.3423	0	0		0	13.6742	0	0
	0	8.65131	0	0		0	7.95523	0	0		0	9.94404	0	0		0	6.86139	0	0		0	8.35299	0	0		0	7.95523	0	0		0	0.0236017	0	0		0	15.1936	0	0		0	14.8248	0	0		0	15.1936	0	0
	0	9.51644	0	0		0	8.75075	0	0		0	10.9384	0	0		0	7.54752	0	0		0	9.18829	0	0		0	8.75075	0	0		0	0.0259619	0	0		0	16.713	0	0		0	16.3073	0	0		0	16.713	0	0
	0	10.3816	0	0		0	9.54627	0	0		0	11.9328	0	0		0	8.23366	0	0		0	10.0236	0	0		0	9.54627	0	0		0	0.028322	0	0		0	18.2323	0	0		0	17.7898	0	0		0	18.2323	0	0
	0	11.2467	0	0		0	10.3418	0	0		0	12.9273	0	0		0	8.9198	0	0		0	10.8589	0	0		0	10.3418	0	0		0	0.0306822	0	0		0	19.7517	0	0		0	19.2723	0	0		0	19.7517	0	0
	0	12.1118	0	0		0	11.1373	0	0		0	13.9216	0	0		0	9.60594	0	0		0	11.6942	0	0		0	11.1373	0	0		0	0.0330424	0	0		0	21.271	0	0		0	20.7548	0	0		0	21.271	0	0
	0	12.977	0	0		0	11.9328	0	0		0	14.9161	0	0		0	10.2921	0	0		0	12.5295	0	0		0	11.9328	0	0		0	0.0354025	0	0		0	22.7904	0	0		0	22.2372	0	0		0	22.7904	0	0
	0	13.8421	0	0		0	12.7284	0	0		0	15.9105	0	0		0	10.9782	0	0		0	13.3648	0	0		0	12.7284	0	0		0	0.0377627	0	0		0	24.3098	0	0		0	23.7197	0	0		0	24.3098	0	0
	0	14.7072	0	0		0	13.5239	0	0		0	16.9049	0	0		0	11.6644	0	0		0	14.2001	0	0		0	13.5239	0	0		0	0.0401229	0	0		0	25.8291	0	0		0	25.2022	0	0		0	25.8291	0	0
	0	15.5724	0	0		0	14.3194	0	0		0	17.8993	0	0		0	12.3505	0	0		0	15.0354	0	0		0	14.3194	0	0		0	0.0424831	0	0		0	27.3485	0	0		0.220534	26.6847	0.826446	386.812		0	27.3485	0	0
	0	16.4375	0	0		0	15.1149	0	0		0	18.8937	0	0		0	13.0366	0	0		0	15.8707	0	0		0	15.1149	0	0		0	0.0448432	0	0		0	28.8678	0	0		0	28.1671	0	0		0	28.8678	0	0
	0	17.3026	0	0		0	15.9105	0	0		0	19.8881	0	0		0	13.7228	0	0		0	16.706	0	0		0	15.9105	0	0		0	0.0472034	0	0		0	30.3872	0	0		0	29.6496	0	0		0	30.3872	0	0
	0	18.1678	0	0		0	16.706	0	0		0	20.8825	0	0		0	14.4089	0	0		0	17.5413	0	0		0	16.706	0	0		0	0.0495636	0	0		0	31.9065	0	0		0	31.1321	0	0		0	31.9065	0	0
	0	19.0329	0	0		0	17.5015	0	0		0	21.8769	0	0		0	15.0951	0	0		0	18.3766	0	0		0	17.5015	0	0		0	0.0519237	0	0		0	33.4259	0	0		0	32.6146	0	0		0	33.4259	0	0
	0	19.898	0	0		0	18.297	0	0		0	22.8713	0	0		0	15.7812	0	0		0	19.2119	0	0		0	18.297	0	0		0	0.0542839	0	0		0	34.9453	0	0		0	34.0971	0	0		0	34.9453	0	0
	0	20.7631	0	0		0	19.0925	0	0		0	23.8657	0	0		0	16.4673	0	0		0	20.0472	0	0		0	19.0925	0	0		0	0.0566441	0	0		0	36.4646	0	0		0	35.5796	0	0		0	36.4646	0	0
	0	21.6283	0	0		0	19.8881	0	0		0	24.8601	0	0		0	17.1535	0	0		0	20.8825	0	0		0	19.8881	0	0		0	0.0590043	0	0		0.703407	37.984	1.85185	6760.3		0.306298	37.062	0.826446	350.594		0	37.984	0	0
	0	22.4934	0	0		0.430908	20.6836	2.08333	785.355		0	25.8545	0	0		0	17.8396	0	0		0	21.7178	0	0		0.328311	20.6836	1.5873	497.272		0	0.0613644	0	0		0	39.5033	0	0		0	38.5445	0	0		0	39.5033	0	0
	0	23.3585	0	0		0	21.4791	0	0		0	26.8489	0	0		0	18.5257	0	0		0	22.5531	0	0		0	21.4791	0	0		0	0.0637246	0	0		0	41.0227	0	0		0	40.027	0	0		0	41.0227	0	0
	0	24.2237	0	0		0	22.2746	0	0		0	27.8433	0	0		0	19.2119	0	0		0	23.3884	0	0		0	22.2746	0	0		0	0.0660848	0	0		0	42.5421	0	0		0	41.5095	0	0		0	42.5421	0	0
	0	25.0888	0	0		0	23.0702	0	0		0	28.8377	0	0		0	19.898	0	0		0	24.2237	0	0		0	23.0702	0	0		0	0.0684449	0	0		0	44.0614	0	0		0	42.992	0	0		0	44.0614	0	0
	0	25.9539	0	0		0	23.8657	0	0		0	29.8321	0	0		0.514604	20.5842	2.5	973.004		0	25.059	0	0		0	23.8657	0	0		0	0.0708051	0	0		0	45.5808	0	0		0	44.4745	0	0		0	45.5808	0	0
	0	26.8191	0	0		0	24.6612	0	0		0	30.8265	0	0		0	21.2703	0	0		0	25.8943	0	0		0	24.6612	0	0		0	0.0731653	0	0		0	47.1001	0	0		0.379809	45.9569	0.826446	320.966		0	47.1001	0	0
	0	27.6842	0	0		1.0607	25.4567	4.16667	1494.43		0	31.8209	0	0		0	21.9564	0	0		0	26.7296	0	0		0	25.4567	0	0		0	0.0755254	0	0		0	48.6195	0	0		0	47.4394	0	0		0	48.6195	0	0
	0	28.5493	0	0		0	26.2523	0	0		0	32.8153	0	0		0	22.6426	0	0		0	27.5649	0	0		0	26.2523	0	0		0	0.0778856	0	0		0	50.1389	0	0		0	48.9219	0	0		0	50.1389	0	0
	0	29.4145	0	0		0	27.0478	0	0		0	33.8097	0	0		0	23.3287	0	0		0	28.4002	0	0		0	27.0478	0	0		0	0.0802458	0	0		0	51.6582	0	0		0	50.4044	0	0		0	51.6582	0	0
	0	30.2796	0	0		0	27.8433	0	0		0	34.8041	0	0		0	24.0148	0	0		0	29.2355	0	0		0	27.8433	0	0		0	0.082606	0	0		0	53.1776	0	0		0	51.8869	0	0		0.844089	53.1776	1.5873	414.842
	0	31.1447	0	0		0	28.6388	0	0		0.715971	35.7985	2	1723.64		0	24.701	0	0		0	30.0708	0	0		0	28.6388	0	0		0	0.0849661	0	0		0	54.6969	0	0		0	53.3693	0	0		0	54.6969	0	0
	0	32.0099	0	0		0	29.4343	0	0		0	36.7929	0	0		0	25.3871	0	0		0	30.9061	0	0		0	29.4343	0	0		0	0.0873263	0	0		0	56.2163	0	0		0	54.8518	0	0		0	56.2163	0	0
	0	32.875	0	0		0.629789	30.2299	2.08333	710.026		0	37.7873	0	0		0	26.0733	0	0		0	31.7414	0	0		0.479839	30.2299	1.5873	445.078		0	0.0896865	0	0		0	57.7357	0	0		0	56.3343	0	0		0	57.7357	0	0
	0	33.7401	0	0		0	31.0254	0	0		0	38.7817	0	0		0	26.7594	0	0		0	32.5767	0	0		0	31.0254	0	0		0	0.0920466	0	0		0	59.255	0	0		0	57.8168	0	0		0	59.255	0	0
	0	34.6052	0	0		0	31.8209	0	0		0	39.7762	0	0		0	27.4455	0	0		0	33.412	0	0		0	31.8209	0	0		0	0.0944068	0	0		0	60.7744	0	0		0	59.2993	0	0		0	60.7744	0	0
	0	35.4704	0	0		0	32.6164	0	0		0	40.7706	0	0		0	28.1317	0	0		0	34.2473	0	0		0	32.6164	0	0		0	0.096767	0	0		0	62.2937	0	0		0	60.7818	0	0		0	62.2937	0	0
	0	36.3355	0	0		0	33.412	0	0		0	41.7649	0	0		0	28.8178	0	0		0	35.0826	0	0		0	33.412	0	0		0	0.0991271	0	0		0	63.8131	0	0		0	62.2642	0	0		0	63.8131	0	0
	0	37.2006	0	0		0	34.2075	0	0		0	42.7594	0	0		0	29.504	0	0		0	35.9179	0	0		0	34.2075	0	0		0	0.101487	0	0		0	65.3325	0	0		0	63.7467	0	0		0	65.3325	0	0
	0	38.0658	0	0		0	35.003	0	0		0	43.7538	0	0		0	30.1901	0	0		0	36.7532	0	0		0	35.003	0	0		0	0.103847	0	0		0	66.8518	0	0		0	65.2292	0	0		0	66.8518	0	0
	0	38.9309	0	0		0	35.7985	0	0		0	44.7482	0	0		0	30.8762	0	0		0	37.5885	0	0		0	35.7985	0	0		0	0.106208	0	0		0	68.3712	0	0		0	66.7117	0	0		0	68.3712	0	0
	0	39.796	0	0		0	36.5941	0	0		0	45.7426	0	0		0	31.5624	0	0		0	38.4238	0	0		0	36.5941	0	0		0	0.108568	0	0		0	69.8905	0	0		0	68.1942	0	0		0	69.8905	0	0
	1.16175	40.6612	2.85714	1170.06		0	37.3896	0	0		0	46.737	0	0		0	32.2485	0	0		0	39.2591	0	0		0	37.3896	0	0		0	0.110928	0	0		0	71.4099	0	0		0	69.6766	0	0		0	71.4099	0	0
	0	41.5263	0	0		0	38.1851	0	0		0	47.7314	0	0		0	32.9346	0	0		0	40.0944	0	0		0	38.1851	0	0		0	0.113288	0	0		0	72.9293	0	0		0	71.1591	0	0		0	72.9293	0	0
	0	42.3914	0	0		0	38.9806	0	0		0	48.7258	0	0		0	33.6208	0	0		0	40.9297	0	0		0	38.9806	0	0		0	0.115648	0	0		0	74.4486	0	0		0	72.6416	0	0		0	74.4486	0	0
	0	43.2565	0	0		0	39.7762	0	0		0	49.7202	0	0		0	34.3069	0	0		0	41.7649	0	0		0	39.7762	0	0		0	0.118009	0	0		0	75.968	0	0		0	74.1241	0	0		0	75.968	0	0
	0	44.1217	0	0		0	40.5717	0	0		0	50.7146	0	0		0	34.9931	0	0		0	42.6003	0	0		0	40.5717	0	0		0	0.120369	0	0		0	77.4873	0	0		0	75.6066	0	0		0	77.4873	0	0
	0	44.9868	0	0		0	41.3672	0	0		0	51.709	0	0		0	35.6792	0	0		0	43.4355	0	0		0	41.3672	0	0		0	0.122729	0	0		0	79.0067	0	0		0	77.0891	0	0		0	79.0067	0	0
	0	45.852	0	0		0	42.1627	0	0		0	52.7034	0	0		0	36.3653	0	0		0	44.2709	0	0		0	42.1627	0	0		0	0.125089	0	0		0	80.526	0	0		0	78.5715	0	0		0	80.526	0	0
	0	46.7171	0	0		0	42.9582	0	0		0	53.6978	0	0		0	37.0515	0	0		0	45.1061	0	0		0	42.9582	0	0		0	0.127449	0	0		0	82.0454	0	0		0	80.054	0	0		0	82.0454	0	0
	0	47.5822	0	0		0	43.7538	0	0		0	54.6922	0	0		0	37.7376	0	0		1.09384	45.9415	2.38095	1045.41		0	43.7538	0	0		0	0.129809	0	0		0	83.5648	0	0		0	81.5365	0	0		0	83.5648	0	0
	0	48.4473	0	0		0	44.5493	0	0		0	55.6866	0	0		0	38.4237	0	0		0	46.7767	0	0		0	44.5493	0	0		0	0.132169	0	0		0	85.0841	0	0		0	83.019	0	0		0	85.0841	0	0
	0	49.3125	0	0		0	45.3448	0	0		0	56.681	0	0		0	39.1099	0	0		0	47.6121	0	0		0	45.3448	0	0		0	0.13453	0	0		0	86.6035	0	0		0	84.5015	0	0		0	86.6035	0	0
	0	50.1776	0	0		0	46.1403	0	0		0	57.6754	0	0		0	39.796	0	0		0	48.4473	0	0		0	46.1403	0	0		0	0.13689	0	0		0	88.1228	0	0		0	85.9839	0	0		0	88.1228	0	0
	1.45836	51.0427	2.85714	1053.09		0	46.9359	0	0		0	58.6698	0	0		0	40.4822	0	0		0	49.2826	0	0		0	46.9359	0	0		0.00331548	0.13925	2.38095	0.0108575		0	89.6422	0	0		0	87.4664	0	0		0	89.6422	0	0
	0	51.9079	0	0		0	47.7314	0	0		0	59.6642	0	0		0	41.1683	0	0		0	50.1179	0	0		0	47.7314	0	0		0	0.14161	0	0		1.68818	91.1616	1.85185	5622.67		0	88.9489	0	0		0	91.1616	0	0
	0	52.773	0	0		0	48.5269	0	0		0	60.6586	0	0		0	41.8544	0	0		0	50.9532	0	0		0	48.5269	0	0		0	0.14397	0	0		0	92.6809	0	0		0.747367	90.4314	0.826446	192.443		0	92.6809	0	0
	0	53.6381	0	0		0	49.3224	0	0		0	61.653	0	0		0	42.5406	0	0		0	51.7885	0	0		0	49.3224	0	0		0	0.146331	0	0		0	94.2003	0	0		0	91.9139	0	0		1.49524	94.2003	1.5873	231.018
	0	54.5033	0	0		0	50.1179	0	0		0	62.6474	0	0		0	43.2267	0	0		0	52.6238	0	0		0	50.1179	0	0		0	0.148691	0	0		0	95.7197	0	0		0	93.3964	0	0		0	95.7197	0	0
	0	55.3684	0	0		0	50.9135	0	0		0	63.6418	0	0		0	43.9129	0	0		0	53.4591	0	0		0.808151	50.9135	1.5873	341.917		0	0.151051	0	0		0	97.239	0	0		0.784123	94.8788	0.826446	181.389		0	97.239	0	0
	0	56.2335	0	0		0	51.709	0	0		0	64.6362	0	0		0	44.599	0	0		0	54.2944	0	0		0	51.709	0	0		0	0.153411	0	0		0	98.7584	0	0		0	96.3613	0	0		0	98.7584	0	0
	0	57.0987	0	0		0	52.5045	0	0		0	65.6306	0	0		0	45.2851	0	0		0	55.1297	0	0		0	52.5045	0	0		0	0.155771	0	0		0	100.278	0	0		0	97.8438	0	0		0	100.278	0	0
	0	57.9638	0	0		0	53.3	0	0		0	66.6251	0	0		0	45.9713	0	0		0	55.965	0	0		0	53.3	0	0		0	0.158131	0	0		0	101.797	0	0		0	99.3263	0	0		1.61583	101.797	1.5873	202.84
	0	58.8289	0	0		0	54.0956	0	0		0	67.6195	0	0		0	46.6574	0	0		0	56.8003	0	0		0	54.0956	0	0		0	0.160492	0	0		0	103.316	0	0		0	100.809	0	0		0	103.316	0	0
	0	59.694	0	0		0	54.8911	0	0		0	68.6138	0	0		0	47.3436	0	0		0	57.6356	0	0		0	54.8911	0	0		0	0.162852	0	0		0	104.836	0	0		0	102.291	0	0		0	104.836	0	0
	1.73026	60.5592	2.85714	951.279		1.16014	55.6866	2.08333	527.71		0	69.6083	0	0		0	48.0297	0	0		0	58.4709	0	0		0	55.6866	0	0		0	0.165212	0	0		0	106.355	0	0		0	103.774	0	0		0	106.355	0	0
	0	61.4243	0	0		0	56.4821	0	0		0	70.6027	0	0		0	48.7158	0	0		0	59.3062	0	0		0	56.4821	0	0		0	0.167572	0	0		0	107.874	0	0		0	105.256	0	0		0	107.874	0	0
	0	62.2894	0	0		0	57.2777	0	0		0	71.5971	0	0		0	49.402	0	0		0	60.1415	0	0		0	57.2777	0	0		0	0.169932	0	0		0	109.394	0	0		0	106.739	0	0		0	109.394	0	0
	0	63.1546	0	0		0	58.0732	0	0		0	72.5915	0	0		0	50.0881	0	0		0	60.9768	0	0		0	58.0732	0	0		0	0.172292	0	0		0	110.913	0	0		0	108.221	0	0		0	110.913	0	0
	0	64.0197	0	0		0	58.8687	0	0		0	73.5859	0	0		0	50.7743	0	0		0	61.8121	0	0		0	58.8687	0	0		0	0.174653	0	0		0	112.433	0	0		0	109.704	0	0		0	112.433	0	0
	0	64.8848	0	0		0	59.6642	0	0		0	74.5803	0	0		0	51.4604	0	0		0	62.6474	0	0		0	59.6642	0	0		0	0.177013	0	0		0	113.952	0	0		0	111.186	0	0		0	113.952	0	0
	0	65.75	0	0		0	60.4597	0	0		0	75.5747	0	0		0	52.1465	0	0		0	63.4827	0	0		0	60.4597	0	0		0	0.179373	0	0		0	115.471	0	0		0	112.669	0	0		0	115.471	0	0
	0	66.6151	0	0		1.27615	61.2553	2.08333	491.428		0	76.5691	0	0		0	52.8327	0	0		0	64.318	0	0		0	61.2553	0	0		0	0.181733	0	0		0	116.991	0	0		0	114.151	0	0		0	116.991	0	0
	0	67.4802	0	0		0	62.0508	0	0		0	77.5635	0	0		0	53.5188	0	0		0	65.1533	0	0		0	62.0508	0	0		0.00438317	0.184093	2.38095	0.0094634		0	118.51	0	0		0	115.634	0	0		0	118.51	0	0
	0	68.3454	0	0		0	62.8463	0	0		0	78.5579	0	0		0	54.2049	0	0		0	65.9886	0	0		0	62.8463	0	0		0	0.186453	0	0		2.22277	120.029	1.85185	5048.96		0	117.116	0	0		0	120.029	0	0
	0	69.2105	0	0		0	63.6418	0	0		0	79.5523	0	0		0	54.8911	0	0		0	66.8239	0	0		0	63.6418	0	0		0	0.188814	0	0		0	121.549	0	0		0	118.599	0	0		0	121.549	0	0
	0	70.0756	0	0		0	64.4374	0	0		0	80.5467	0	0		0	55.5772	0	0		0	67.6592	0	0		0	64.4374	0	0		0.00455176	0.191174	2.38095	0.00925202		0	123.068	0	0		0	120.081	0	0		0	123.068	0	0
	2.02688	70.9407	2.85714	846.112		0	65.2329	0	0		1.63082	81.5411	2	1228.35		0	56.2634	0	0		0	68.4945	0	0		0	65.2329	0	0		0	0.193534	0	0		2.30718	124.588	1.85185	4961.2		0	121.564	0	0		0	124.588	0	0
	0	71.8059	0	0		0	66.0284	0	0		0	82.5355	0	0		0	56.9495	0	0		0	69.3298	0	0		0	66.0284	0	0		0	0.195894	0	0		0	126.107	0	0		0	123.046	0	0		0	126.107	0	0
	0	72.671	0	0		0	66.8239	0	0		0	83.5299	0	0		0	57.6356	0	0		0	70.1651	0	0		0	66.8239	0	0		0	0.198254	0	0		0	127.626	0	0		1.02916	124.528	0.826446	116.05		0	127.626	0	0
	0	73.5362	0	0		0	67.6195	0	0		0	84.5243	0	0		0	58.3218	0	0		0	71.0004	0	0		0	67.6195	0	0		0	0.200615	0	0		0	129.146	0	0		0	126.011	0	0		0	129.146	0	0
	0	74.4013	0	0		0	68.415	0	0		0	85.5187	0	0		0	59.0079	0	0		0	71.8357	0	0		0	68.415	0	0		0	0.202975	0	0		0	130.665	0	0		0	127.493	0	0		0	130.665	0	0
	0	75.2664	0	0		0	69.2105	0	0		0	86.5131	0	0		0	59.694	0	0		0	72.671	0	0		0	69.2105	0	0		0	0.205335	0	0		0	132.184	0	0		0	128.976	0	0		0	132.184	0	0
	2.17519	76.1315	2.85714	795.838		0	70.006	0	0		0	87.5075	0	0		0	60.3802	0	0		0	73.5063	0	0		0	70.006	0	0		0	0.207695	0	0		0	133.704	0	0		0	130.458	0	0		0	133.704	0	0
	0	76.9967	0	0		0	70.8015	0	0		0	88.5019	0	0		0	61.0663	0	0		0	74.3416	0	0		0	70.8015	0	0		0	0.210055	0	0		2.50413	135.223	1.85185	4759.41		0	131.941	0	0		0	135.223	0	0
	0	77.8618	0	0		0	71.5971	0	0		0	89.4963	0	0		0	61.7525	0	0		0	75.1769	0	0		0	71.5971	0	0		0	0.212415	0	0		0	136.742	0	0		0	133.423	0	0		0	136.742	0	0
	0	78.7269	0	0		0	72.3926	0	0		0	90.4907	0	0		0	62.4386	0	0		0	76.0122	0	0		0	72.3926	0	0		0	0.214776	0	0		0	138.262	0	0		0	134.906	0	0		0	138.262	0	0
	0	79.5921	0	0		0	73.1881	0	0		0	91.4851	0	0		0	63.1247	0	0		0	76.8475	0	0		0	73.1881	0	0		0	0.217136	0	0		0	139.781	0	0		1.12718	136.388	0.826446	93.9831		0	139.781	0	0
	0	80.4572	0	0		0	73.9836	0	0		0	92.4795	0	0		0	63.8109	0	0		0	77.6828	0	0		0	73.9836	0	0		0	0.219496	0	0		0	141.3	0	0		0	137.871	0	0		0	141.3	0	0
	0	81.3223	0	0		0	74.7792	0	0		0	93.4739	0	0		0	64.497	0	0		0	78.5181	0	0		0	74.7792	0	0		0	0.221856	0	0		0	142.82	0	0		0	139.353	0	0		0	142.82	0	0
	0	82.1875	0	0		0	75.5747	0	0		0	94.4684	0	0		0	65.1832	0	0		0	79.3534	0	0		0	75.5747	0	0		0	0.224216	0	0		0	144.339	0	0		0	140.836	0	0		0	144.339	0	0
	0	83.0526	0	0		0	76.3702	0	0		0	95.4627	0	0		0	65.8693	0	0		0	80.1887	0	0		1.21223	76.3702	1.5873	233.593		0	0.226576	0	0		0	145.858	0	0		0	142.318	0	0		0	145.858	0	0
	0	83.9177	0	0		0	77.1657	0	0		0	96.4572	0	0		0	66.5554	0	0		0	81.024	0	0		0	77.1657	0	0		0	0.228936	0	0		0	147.378	0	0		0	143.801	0	0		0	147.378	0	0
	0	84.7828	0	0		0	77.9613	0	0		0	97.4515	0	0		0	67.2416	0	0		0	81.8593	0	0		0	77.9613	0	0		0	0.231297	0	0		0	148.897	0	0		0	145.283	0	0		0	148.897	0	0
	0	85.648	0	0		0	78.7568	0	0		0	98.446	0	0		0	67.9277	0	0		0	82.6946	0	0		0	78.7568	0	0		0	0.233657	0	0		0	150.417	0	0		0	146.766	0	0		0	150.417	0	0
	0	86.5131	0	0		0	79.5523	0	0		0	99.4404	0	0		0	68.6138	0	0		0	83.5299	0	0		0	79.5523	0	0		0	0.236017	0	0		0	151.936	0	0		0	148.248	0	0		0	151.936	0	0
	0	87.3782	0	0		0	80.3478	0	0		0	100.435	0	0		0	69.3	0	0		0	84.3652	0	0		0	80.3478	0	0		0	0.238377	0	0		0	153.455	0	0		0	149.731	0	0		0	153.455	0	0
	0	88.2434	0	0		3.38097	81.1433	4.16667	744.793		0	101.429	0	0		0	69.9861	0	0		0	85.2005	0	0		5.15196	81.1433	6.34921	862.29		0	0.240737	0	0		0	154.975	0	0		0	151.213	0	0		0	154.975	0	0
	0	89.1085	0	0		0	81.9389	0	0		0	102.424	0	0		0	70.6723	0	0		0	86.0358	0	0		0	81.9389	0	0		0	0.243097	0	0		0	156.494	0	0		0	152.696	0	0		0	156.494	0	0
	0	89.9736	0	0		0	82.7344	0	0		0	103.418	0	0		0	71.3584	0	0		0	86.8711	0	0		0	82.7344	0	0		0	0.245458	0	0		0	158.013	0	0		0	154.178	0	0		0	158.013	0	0
	0	90.8388	0	0		0	83.5299	0	0		0	104.412	0	0		0	72.0445	0	0		0	87.7064	0	0		0	83.5299	0	0		0	0.247818	0	0		0	159.533	0	0		0	155.661	0	0		0	159.533	0	0
	2.62011	91.7039	2.85714	654.254		0	84.3254	0	0		0	105.407	0	0		0	72.7307	0	0		0	88.5417	0	0		0	84.3254	0	0		0	0.250178	0	0		0	161.052	0	0		0	157.143	0	0		0	161.052	0	0
	0	92.569	0	0		0	85.1209	0	0		0	106.401	0	0		0	73.4168	0	0		0	89.377	0	0		0	85.1209	0	0		0	0.252538	0	0		0	162.571	0	0		0	158.626	0	0		0	162.571	0	0
	0	93.4342	0	0		0	85.9165	0	0		0	107.396	0	0		0	74.103	0	0		0	90.2123	0	0		0	85.9165	0	0		0	0.254898	0	0		0	164.091	0	0		0	160.108	0	0		0	164.091	0	0
	0	94.2993	0	0		0	86.712	0	0		0	108.39	0	0		0	74.7891	0	0		0	91.0476	0	0		1.37638	86.712	1.5873	195.463		0	0.257259	0	0		0	165.61	0	0		1.33546	161.59	0.826446	54.8101		0	165.61	0	0
	0	95.1644	0	0		0	87.5075	0	0		0	109.384	0	0		0	75.4752	0	0		0	91.8829	0	0		0	87.5075	0	0		0	0.259619	0	0		0	167.13	0	0		0	163.073	0	0		0	167.13	0	0
	0	96.0296	0	0		0	88.303	0	0		0	110.379	0	0		0	76.1614	0	0		0	92.7182	0	0		0	88.303	0	0		0	0.261979	0	0		0	168.649	0	0		0	164.555	0	0		0	168.649	0	0
	2.76842	96.8947	2.85714	610.139		0	89.0986	0	0		0	111.373	0	0		0	76.8475	0	0		0	93.5535	0	0		0	89.0986	0	0		0	0.264339	0	0		0	170.168	0	0		0	166.038	0	0		0	170.168	0	0
	0	97.7598	0	0		0	89.8941	0	0		0	112.368	0	0		0	77.5336	0	0		0	94.3888	0	0		0	89.8941	0	0		0	0.266699	0	0		0	171.688	0	0		0	167.52	0	0		0	171.688	0	0
	0	98.6249	0	0		0	90.6896	0	0		0	113.362	0	0		0	78.2198	0	0		0	95.2241	0	0		0	90.6896	0	0		0	0.269059	0	0		0	173.207	0	0		0	169.003	0	0		0	173.207	0	0
	0	99.4901	0	0		0	91.4851	0	0		0	114.356	0	0		0	78.9059	0	0		0	96.0594	0	0		0	91.4851	0	0		0	0.27142	0	0		0	174.726	0	0		0	170.485	0	0		0	174.726	0	0
	0	100.355	0	0		0	92.2807	0	0		0	115.351	0	0		0	79.5921	0	0		0	96.8947	0	0		0	92.2807	0	0		0	0.27378	0	0		0	176.246	0	0		0	171.968	0	0		0	176.246	0	0
	0	101.22	0	0		0	93.0762	0	0		0	116.345	0	0		0	80.2782	0	0		0	97.73	0	0		0	93.0762	0	0		0	0.27614	0	0		0	177.765	0	0		0	173.45	0	0		0	177.765	0	0
	0	102.085	0	0		0	93.8717	0	0		0	117.34	0	0		0	80.9643	0	0		0	98.5653	0	0		0	93.8717	0	0		0	0.2785	0	0		0	179.284	0	0		0	174.933	0	0		0	179.284	0	0
	0	102.951	0	0		0	94.6672	0	0		0	118.334	0	0		0	81.6505	0	0		0	99.4006	0	0		0	94.6672	0	0		0	0.28086	0	0		0	180.804	0	0		0	176.415	0	0		0	180.804	0	0
	0	103.816	0	0		0	95.4627	0	0		0	119.328	0	0		0	82.3366	0	0		0	100.236	0	0		0	95.4627	0	0		0	0.28322	0	0		0	182.323	0	0		0	177.898	0	0		0	182.323	0	0
	0	104.681	0	0		2.00538	96.2583	2.08333	292.955		0	120.323	0	0		0	83.0228	0	0		0	101.071	0	0		0	96.2583	0	0		0	0.285581	0	0		0	183.843	0	0		0	179.38	0	0		0	183.843	0	0
	0	105.546	0	0		0	97.0538	0	0		0	121.317	0	0		0	83.7089	0	0		0	101.906	0	0		0	97.0538	0	0		0	0.287941	0	0		0	185.362	0	0		1.49473	180.863	0.826446	31.9378		0	185.362	0	0
	0	106.411	0	0		0	97.8493	0	0		0	122.312	0	0		0	84.395	0	0		0	102.742	0	0		0	97.8493	0	0		0	0.290301	0	0		0	186.881	0	0		0	182.345	0	0		0	186.881	0	0
	0	107.276	0	0		0	98.6448	0	0		0	123.306	0	0		0	85.0812	0	0		0	103.577	0	0		0	98.6448	0	0		0	0.292661	0	0		0	188.401	0	0		0	183.828	0	0		0	188.401	0	0
	0	108.141	0	0		0	99.4404	0	0		0	124.3	0	0		0	85.7673	0	0		0	104.412	0	0		0	99.4404	0	0		0	0.295021	0	0		0	189.92	0	0		0	185.31	0	0		0	189.92	0	0
	0	109.007	0	0		0	100.236	0	0		0	125.295	0	0		0	86.4535	0	0		0	105.248	0	0		0	100.236	0	0		0	0.297381	0	0		0	191.439	0	0		0	186.793	0	0		0	191.439	0	0
	0	109.872	0	0		0	101.031	0	0		0	126.289	0	0		0	87.1396	0	0		0	106.083	0	0		0	101.031	0	0		0	0.299742	0	0		0	192.959	0	0		0	188.275	0	0		0	192.959	0	0
	0	110.737	0	0		0	101.827	0	0		0	127.284	0	0		0	87.8257	0	0		0	106.918	0	0		1.6163	101.827	1.5873	145.842		0	0.302102	0	0		0	194.478	0	0		0	189.758	0	0		0	194.478	0	0
	0	111.602	0	0		0	102.623	0	0		0	128.278	0	0		0	88.5119	0	0		0	107.754	0	0		0	102.623	0	0		0	0.304462	0	0		0	195.997	0	0		0	191.24	0	0		0	195.997	0	0
	0	112.467	0	0		0	103.418	0	0		0	129.273	0	0		0	89.198	0	0		0	108.589	0	0		0	103.418	0	0		0	0.306822	0	0		0	197.517	0	0		1.59275	192.723	0.826446	20.9141		0	197.517	0	0
	0	113.332	0	0		0	104.213	0	0		0	130.267	0	0		0	89.8841	0	0		0	109.424	0	0		0	104.213	0	0		0	0.309182	0	0		0	199.036	0	0		0	194.205	0	0		0	199.036	0	0
	0	114.197	0	0		0	105.009	0	0		0	131.261	0	0		0	90.5703	0	0		0	110.26	0	0		0	105.009	0	0		0	0.311542	0	0		0	200.555	0	0		0	195.688	0	0		0	200.555	0	0
	0	115.062	0	0		0	105.805	0	0		0	132.256	0	0		2.28141	91.2564	2.5	400.75		0	111.095	0	0		0	105.805	0	0		0	0.313903	0	0		0	202.075	0	0		0	197.17	0	0		0	202.075	0	0
	0	115.928	0	0		0	106.6	0	0		0	133.25	0	0		0	91.9426	0	0		0	111.93	0	0		0	106.6	0	0		0	0.316263	0	0		0	203.594	0	0		0	198.653	0	0		3.23165	203.594	1.5873	2.00775
	0	116.793	0	0		0	107.396	0	0		0	134.244	0	0		0	92.6287	0	0		0	112.765	0	0		0	107.396	0	0		0	0.318623	0	0		0	205.113	0	0		0	200.135	0	0		0	205.113	0	0
	0	117.658	0	0		0	108.191	0	0		0	135.239	0	0		0	93.3148	0	0		0	113.601	0	0		0	108.191	0	0		0	0.320983	0	0		0	206.633	0	0		0	201.618	0	0		0	206.633	0	0
	0	118.523	0	0		0	108.987	0	0		0	136.233	0	0		0	94.001	0	0		0	114.436	0	0		0	108.987	0	0		0.00769865	0.323343	2.38095	0.00574462		0	208.152	0	0		1.67851	203.1	0.826446	13.1754		0	208.152	0	0
	0	119.388	0	0		0	109.782	0	0		0	137.228	0	0		0	94.6871	0	0		0	115.271	0	0		0	109.782	0	0		0	0.325703	0	0		0	209.672	0	0		0	204.583	0	0		0	209.672	0	0
	0	120.253	0	0		0	110.578	0	0		0	138.222	0	0		0	95.3733	0	0		0	116.107	0	0		0	110.578	0	0		0	0.328064	0	0		0	211.191	0	0		0	206.065	0	0		0	211.191	0	0
	0	121.118	0	0		0	111.373	0	0		0	139.216	0	0		0	96.0594	0	0		2.78433	116.942	2.38095	456.986		0	111.373	0	0		0	0.330424	0	0		0	212.71	0	0		0	207.548	0	0		0	212.71	0	0
	0	121.984	0	0		0	112.169	0	0		0	140.211	0	0		0	96.7455	0	0		0	117.777	0	0		1.78046	112.169	1.5873	116.07		0	0.332784	0	0		0	214.23	0	0		0	209.03	0	0		0	214.23	0	0
	0	122.849	0	0		0	112.964	0	0		0	141.205	0	0		0	97.4317	0	0		0	118.612	0	0		0	112.964	0	0		0	0.335144	0	0		0	215.749	0	0		0	210.512	0	0		0	215.749	0	0
	0	123.714	0	0		0	113.76	0	0		0	142.2	0	0		0	98.1178	0	0		0	119.448	0	0		0	113.76	0	0		0	0.337504	0	0		0	217.268	0	0		0	211.995	0	0		0	217.268	0	0
	0	124.579	0	0		0	114.555	0	0		0	143.194	0	0		0	98.804	0	0		0	120.283	0	0		0	114.555	0	0		0	0.339865	0	0		0	218.788	0	0		0	213.477	0	0		0	218.788	0	0
	0	125.444	0	0		0	115.351	0	0		0	144.189	0	0		0	99.4901	0	0		0	121.118	0	0		0	115.351	0	0		0.0162964	0.342225	4.7619	0.0106229		0	220.307	0	0		1.77653	214.96	0.826446	6.51076		0	220.307	0	0
	0	126.309	0	0		0	116.146	0	0		0	145.183	0	0		0	100.176	0	0		0	121.954	0	0		0	116.146	0	0		0	0.344585	0	0		0	221.827	0	0		0	216.442	0	0		0	221.827	0	0
	0	127.174	0	0		2.43629	116.942	2.08333	199.671		0	146.177	0	0		0	100.862	0	0		0	122.789	0	0		3.71244	116.942	3.1746	206.947		0	0.346945	0	0		0	223.346	0	0		0	217.925	0	0		0	223.346	0	0
	0	128.039	0	0		0	117.737	0	0		0	147.172	0	0		0	101.549	0	0		0	123.624	0	0		0	117.737	0	0		0	0.349305	0	0		0	224.865	0	0		0	219.407	0	0		0	224.865	0	0
	0	128.905	0	0		0	118.533	0	0		0	148.166	0	0		0	102.235	0	0		0	124.46	0	0		0	118.533	0	0		0	0.351665	0	0		0	226.385	0	0		0	220.89	0	0		0	226.385	0	0
	0	129.77	0	0		0	119.328	0	0		0	149.161	0	0		0	102.921	0	0		0	125.295	0	0		0	119.328	0	0		0	0.354025	0	0		0	227.904	0	0		0	222.372	0	0		0	227.904	0	0
	0	130.635	0	0		0	120.124	0	0		0	150.155	0	0		0	103.607	0	0		0	126.13	0	0		0	120.124	0	0		0	0.356386	0	0		0	229.423	0	0		0	223.855	0	0		0	229.423	0	0
	0	131.5	0	0		0	120.919	0	0		0	151.149	0	0		0	104.293	0	0		0	126.966	0	0		0	120.919	0	0		0	0.358746	0	0		0	230.943	0	0		0	225.337	0	0		0	230.943	0	0
	0	132.365	0	0		0	121.715	0	0		0	152.144	0	0		0	104.979	0	0		0	127.801	0	0		1.93198	121.715	1.5873	91.6009		0	0.361106	0	0		0	232.462	0	0		0	226.82	0	0		0	232.462	0	0
	0	133.23	0	0		0	122.51	0	0		0	153.138	0	0		0	105.665	0	0		0	128.636	0	0		0	122.51	0	0		0	0.363466	0	0		0	233.981	0	0		0	228.302	0	0		0	233.981	0	0
	0	134.095	0	0		0	123.306	0	0		0	154.133	0	0		0	106.352	0	0		0	129.471	0	0		0	123.306	0	0		0	0.365826	0	0		0	235.501	0	0		0	229.785	0	0		0	235.501	0	0
	0	134.96	0	0		0	124.102	0	0		0	155.127	0	0		0	107.038	0	0		0	130.307	0	0		0	124.102	0	0		0	0.368187	0	0		0	237.02	0	0		0	231.267	0	0		0	237.02	0	0
	0	135.826	0	0		0	124.897	0	0		0	156.121	0	0		0	107.724	0	0		0	131.142	0	0		0	124.897	0	0		0	0.370547	0	0		0	238.539	0	0		0	232.75	0	0		0	238.539	0	0
	0	136.691	0	0		0	125.693	0	0		0	157.116	0	0		0	108.41	0	0		0	131.977	0	0		0	125.693	0	0		0	0.372907	0	0		0	240.059	0	0		0	234.232	0	0		0	240.059	0	0
	0	137.556	0	0		0	126.488	0	0		0	158.11	0	0		0	109.096	0	0		0	132.813	0	0		0	126.488	0	0		0	0.375267	0	0		0	241.578	0	0		0	235.715	0	0		0	241.578	0	0
	0	138.421	0	0		0	127.284	0	0		0	159.105	0	0		0	109.782	0	0		0	133.648	0	0		2.02038	127.284	1.5873	78.6635		0.00899112	0.377627	2.38095	0.00454506		0	243.097	0	0		3.92061	237.197	1.65289	0.561916		0	243.097	0	0
	0	139.286	0	0		0	128.079	0	0		0	160.099	0	0		0	110.468	0	0		0	134.483	0	0		0	128.079	0	0		0	0.379987	0	0		4.52994	244.617	1.85185	2927.01		0	238.68	0	0		0	244.617	0	0
	0	140.151	0	0		0	128.875	0	0		0	161.093	0	0		0	111.154	0	0		0	135.319	0	0		0	128.875	0	0		0	0.382348	0	0		0	246.136	0	0		0	240.162	0	0		0	246.136	0	0
	0	141.016	0	0		0	129.67	0	0		0	162.088	0	0		0	111.841	0	0		0	136.154	0	0		0	129.67	0	0		0	0.384708	0	0		0	247.656	0	0		0	241.644	0	0		0	247.656	0	0
	0	141.881	0	0		0	130.466	0	0		0	163.082	0	0		0	112.527	0	0		0	136.989	0	0		0	130.466	0	0		0	0.387068	0	0		0	249.175	0	0		0	243.127	0	0		3.95516	249.175	1.5873	18.7116
	0	142.747	0	0		0	131.261	0	0		0	164.077	0	0		0	113.213	0	0		0	137.824	0	0		0	131.261	0	0		0	0.389428	0	0		0	250.694	0	0		4.04313	244.609	1.65289	0.0413567		0	250.694	0	0
	0	143.612	0	0		0	132.057	0	0		0	165.071	0	0		0	113.899	0	0		0	138.66	0	0		0	132.057	0	0		0	0.391788	0	0		0	252.214	0	0		0	246.092	0	0		0	252.214	0	0
	0	144.477	0	0		0	132.852	0	0		0	166.065	0	0		0	114.585	0	0		0	139.495	0	0		0	132.852	0	0		0	0.394148	0	0		0	253.733	0	0		0	247.575	0	0		0	253.733	0	0
	0	145.342	0	0		0	133.648	0	0		0	167.06	0	0		0	115.271	0	0		0	140.33	0	0		0	133.648	0	0		0	0.396509	0	0		0	255.252	0	0		0	249.057	0	0		0	255.252	0	0
	0	146.207	0	0		0	134.443	0	0		0	168.054	0	0		0	115.957	0	0		0	141.166	0	0		0	134.443	0	0		0	0.398869	0	0		0	256.772	0	0		0	250.54	0	0		0	256.772	0	0
	0	147.072	0	0		0	135.239	0	0		0	169.049	0	0		2.91609	116.644	2.5	256.15		3.38097	142.001	2.38095	306.619		0	135.239	0	0		0	0.401229	0	0		0	258.291	0	0		0	252.022	0	0		0	258.291	0	0
	0	147.937	0	0		0	136.034	0	0		0	170.043	0	0		0	117.33	0	0		0	142.836	0	0		0	136.034	0	0		0	0.403589	0	0		0	259.81	0	0		0	253.504	0	0		0	259.81	0	0
	0	148.803	0	0		2.85062	136.83	2.08333	126.786		0	171.037	0	0		0	118.016	0	0		0	143.671	0	0		4.34381	136.83	3.1746	117.552		0	0.405949	0	0		0	261.33	0	0		0	254.987	0	0		0	261.33	0	0
	0	149.668	0	0		0	137.625	0	0		0	172.032	0	0		0	118.702	0	0		0	144.507	0	0		0	137.625	0	0		0	0.408309	0	0		0	262.849	0	0		0	256.469	0	0		0	262.849	0	0
	0	150.533	0	0		0	138.421	0	0		0	173.026	0	0		0	119.388	0	0		0	145.342	0	0		0	138.421	0	0		0	0.41067	0	0		0	264.368	0	0		0	257.952	0	0		0	264.368	0	0
	0	151.398	0	0		0	139.216	0	0		0	174.021	0	0		0	120.074	0	0		0	146.177	0	0		0	139.216	0	0		0	0.41303	0	0		0	265.888	0	0		4.28817	259.434	1.65289	4.4492		0	265.888	0	0
	0	152.263	0	0		0	140.012	0	0		0	175.015	0	0		0	120.76	0	0		0	147.013	0	0		0	140.012	0	0		0	0.41539	0	0		4.95199	267.407	1.85185	2601.05		0	260.917	0	0		0	267.407	0	0
	0	153.128	0	0		0	140.808	0	0		0	176.01	0	0		0	121.447	0	0		0	147.848	0	0		0	140.808	0	0		0	0.41775	0	0		0	268.927	0	0		0	262.399	0	0		0	268.927	0	0
	0	153.993	0	0		0	141.603	0	0		0	177.004	0	0		0	122.133	0	0		0	148.683	0	0		0	141.603	0	0		0	0.42011	0	0		0	270.446	0	0		0	263.882	0	0		0	270.446	0	0
	0	154.858	0	0		0	142.399	0	0		0	177.998	0	0		0	122.819	0	0		0	149.518	0	0		0	142.399	0	0		0	0.422471	0	0		0	271.965	0	0		0	265.364	0	0		0	271.965	0	0
	0	155.724	0	0		0	143.194	0	0		0	178.993	0	0		0	123.505	0	0		0	150.354	0	0		0	143.194	0	0		0	0.424831	0	0		0	273.485	0	0		0	266.847	0	0		0	273.485	0	0
	0	156.589	0	0		0	143.99	0	0		0	179.987	0	0		0	124.191	0	0		0	151.189	0	0		0	143.99	0	0		0	0.427191	0	0		0	275.004	0	0		2.2176	268.329	0.826446	5.29063		0	275.004	0	0
	0	157.454	0	0		0	144.785	0	0		0	180.982	0	0		0	124.877	0	0		0	152.024	0	0		0	144.785	0	0		0	0.429551	0	0		0	276.523	0	0		0	269.812	0	0		0	276.523	0	0
	0	158.319	0	0		0	145.581	0	0		0	181.976	0	0		0	125.563	0	0		0	152.86	0	0		0	145.581	0	0		0	0.431911	0	0		0	278.043	0	0		0	271.294	0	0		0	278.043	0	0
	0	159.184	0	0		0	146.376	0	0		0	182.97	0	0		0	126.249	0	0		0	153.695	0	0		0	146.376	0	0		0	0.434271	0	0		5.17708	279.562	1.85185	2435.07		0	272.777	0	0		0	279.562	0	0
	0	160.049	0	0		0	147.172	0	0		0	183.965	0	0		3.17339	126.936	2.5	206.709		0	154.53	0	0		4.67212	147.172	3.1746	80.9903		0	0.436632	0	0		0	281.082	0	0		0	274.259	0	0		0	281.082	0	0
	0	160.914	0	0		0	147.967	0	0		0	184.959	0	0		0	127.622	0	0		0	155.366	0	0		0	147.967	0	0		0	0.438992	0	0		0	282.601	0	0		0	275.742	0	0		0	282.601	0	0
	0	161.78	0	0		0	148.763	0	0		0	185.953	0	0		0	128.308	0	0		0	156.201	0	0		0	148.763	0	0		0	0.441352	0	0		0	284.12	0	0		0	277.224	0	0		0	284.12	0	0
	0	162.645	0	0		0	149.558	0	0		0	186.948	0	0		0	128.994	0	0		0	157.036	0	0		0	149.558	0	0		0	0.443712	0	0		0	285.64	0	0		0	278.707	0	0		0	285.64	0	0
	0	163.51	0	0		0	150.354	0	0		0	187.942	0	0		0	129.68	0	0		0	157.871	0	0		0	150.354	0	0		0	0.446072	0	0		0	287.159	0	0		0	280.189	0	0		0	287.159	0	0
	0	164.375	0	0		0	151.149	0	0		0	188.937	0	0		0	130.366	0	0		0	158.707	0	0		0	151.149	0	0		0	0.448432	0	0		0	288.678	0	0		0	281.671	0	0		0	288.678	0	0
	0	165.24	0	0		0	151.945	0	0		0	189.931	0	0		0	131.053	0	0		0	159.542	0	0		0	151.945	0	0		0	0.450792	0	0		0	290.198	0	0		0	283.154	0	0		0	290.198	0	0
	0	166.105	0	0		3.18209	152.74	2.08333	80.3431		0	190.925	0	0		0	131.739	0	0		0	160.377	0	0		0	152.74	0	0		0	0.453153	0	0		0	291.717	0	0		0	284.637	0	0		0	291.717	0	0
	0	166.97	0	0		0	153.536	0	0		0	191.92	0	0		0	132.425	0	0		0	161.213	0	0		0	153.536	0	0		0	0.455513	0	0		0	293.236	0	0		0	286.119	0	0		0	293.236	0	0
	4.7953	167.835	2.85714	161.54		0	154.332	0	0		0	192.914	0	0		0	133.111	0	0		0	162.048	0	0		0	154.332	0	0		0	0.457873	0	0		0	294.756	0	0		0	287.601	0	0		0	294.756	0	0
	0	168.701	0	0		0	155.127	0	0		0	193.909	0	0		0	133.797	0	0		7.75635	162.883	4.7619	408.312		0	155.127	0	0		0	0.460233	0	0		0	296.275	0	0		0	289.084	0	0		0	296.275	0	0
	0	169.566	0	0		0	155.923	0	0		0	194.903	0	0		0	134.483	0	0		0	163.719	0	0		0	155.923	0	0		0	0.462593	0	0		0	297.794	0	0		0	290.566	0	0		0	297.794	0	0
	0	170.431	0	0		0	156.718	0	0		0	195.898	0	0		0	135.169	0	0		0	164.554	0	0		0	156.718	0	0		0	0.464954	0	0		0	299.314	0	0		0	292.049	0	0		0	299.314	0	0
	0	171.296	0	0		0	157.513	0	0		0	196.892	0	0		0	135.855	0	0		0	165.389	0	0		0	157.513	0	0		0	0.467314	0	0		0	300.833	0	0		2.42588	293.531	0.826446	21.0795		0	300.833	0	0
	0	172.161	0	0		0	158.309	0	0		0	197.886	0	0		0	136.542	0	0		0	166.225	0	0		0	158.309	0	0		0	0.469674	0	0		0	302.353	0	0		0	295.014	0	0		0	302.353	0	0
	0	173.026	0	0		0	159.105	0	0		0	198.881	0	0		0	137.228	0	0		0	167.06	0	0		0	159.105	0	0		0	0.472034	0	0		0	303.872	0	0		0	296.496	0	0		0	303.872	0	0
	0	173.891	0	0		0	159.9	0	0		0	199.875	0	0		0	137.914	0	0		3.9975	167.895	2.38095	182.655		0	159.9	0	0		0	0.474394	0	0		0	305.391	0	0		0	297.979	0	0		0	305.391	0	0
	0	174.756	0	0		0	160.696	0	0		0	200.869	0	0		0	138.6	0	0		0	168.73	0	0		0	160.696	0	0		0	0.476754	0	0		0	306.911	0	0		0	299.461	0	0		0	306.911	0	0
	0	175.622	0	0		0	161.491	0	0		0	201.864	0	0		0	139.286	0	0		0	169.566	0	0		0	161.491	0	0		0.0114075	0.479115	2.38095	0.00267881		0	308.43	0	0		7.46142	300.944	2.47934	83.1638		0	308.43	0	0
	0	176.487	0	0		0	162.287	0	0		4.05717	202.858	2	320.086		0	139.972	0	0		0	170.401	0	0		2.57598	162.287	1.5873	19.8852		0	0.481475	0	0		0	309.949	0	0		0	302.426	0	0		0	309.949	0	0
	0	177.352	0	0		0	163.082	0	0		0	203.853	0	0		0	140.658	0	0		0	171.236	0	0		0	163.082	0	0		0	0.483835	0	0		0	311.469	0	0		0	303.909	0	0		0	311.469	0	0
[truncated: 818 more rows]
