# Supplementary material for: T cell stiffness is enhanced upon formation of immunological synapse
Source: eLife. 2021 Jul 27;10:e66643. doi: 10.7554/eLife.66643 (PMC8360652; doi:10.7554/eLife.66643)
Supplement: Figure 3—source data 1. [file elife-66643-fig3-data1.xlsx]

## Sheet: Source data Fig 3
Fig. 3C, D	primary T cell DMSO control		Fig. 3C, D	primary T cell EGTA 500 µmol
	lamellipodium	cell body		lamellipodium	cell body
	[kPa]	[kPa]		[kPa]	[kPa]
2019-07-31 Tcell DMSO control cell1-1	220.014	23.5381	2019-07-31 T cell EGTA 500 cell1-1	61.4761	22.1843
2019-07-31 Tcell DMSO control cell2-1	137.993	28.1596	2019-08-28 T cell EGTA 500 cell 1-2	94.6475	36.7102
2019-07-31 Tcell DMSO control cell3-1	207.964	24.6597	2019-08-28 T cell EGTA 500 cell 2-1	97.3359	66.9842
2019-07-31 Tcell DMSO control cell4-1	263.444	93.8264	2019-09-05 T cell EGTA 500 cell1-1	85.0262	49.699
2019-07-31 Tcell DMSO control cell5-1	151.984	25.1779	2019-09-05 T cell EGTA 500 cell2-1	115.998	62.2337
2019-08-28 T cell DMSO control cell 1-1	166.807	56.3149	2019-09-05 T cell EGTA 500 cell3-1	133.693	75.2452
2019-08-28 T cell DMSO control cell 2-1	237.556	74.2517	2019-09-05 T cell EGTA 500 cell4-1	81.6139	50.3801
2019-08-28 T cell DMSO control cell 2-2	186.183	119.584	2019-09-05 T cell EGTA 500 cell5-1	88.1088	73.5676
2019-08-28 T cell DMSO control cell 3-2	166.096	132.052
2019-09-05 T cell DMSO control cell1-1	203.402	68.2551
2019-09-05 T cell DMSO control cell2-1	160.808	48.9258
2019-09-05 T cell DMSO control cell3-1	214.536	67.3883
Fig. 3E	primary T cell DMSO control		Fig. 3F	primary T cell EGTA 500 µmol
	lamellipodium	cell body		lamellipodium	cell body
2019-07-31 Tcell DMSO control cell1-1	9.34714	1	2019-07-31 T cell EGTA 500 cell1-1	2.77116	1
2019-07-31 Tcell DMSO control cell2-1	4.90038	1	2019-08-28 T cell EGTA 500 cell 1-2	2.57823	1
2019-07-31 Tcell DMSO control cell3-1	8.43338	1	2019-08-28 T cell EGTA 500 cell 2-1	1.45312	1
2019-07-31 Tcell DMSO control cell4-1	2.80779	1	2019-09-05 T cell EGTA 500 cell1-1	1.71082	1
2019-07-31 Tcell DMSO control cell5-1	6.0364	1	2019-09-05 T cell EGTA 500 cell2-1	1.8639	1
2019-08-28 T cell DMSO control cell 1-1	2.96204	1	2019-09-05 T cell EGTA 500 cell3-1	1.77677	1
2019-08-28 T cell DMSO control cell 2-1	3.19933	1	2019-09-05 T cell EGTA 500 cell4-1	1.61996	1
2019-08-28 T cell DMSO control cell 2-2	1.55692	1	2019-09-05 T cell EGTA 500 cell5-1	1.19766	1
2019-08-28 T cell DMSO control cell 3-2	1.2578	1
2019-09-05 T cell DMSO control cell1-1	2.98002	1
2019-09-05 T cell DMSO control cell2-1	3.28678	1
2019-09-05 T cell DMSO control cell3-1	3.18358	1

## Sheet: raw data_ T cell full AB DMSO
	2019-07-31 Tcell DMSO control cell1-1lamellipodium					2019-07-31 Tcell DMSO control cell1-1 cell body					2019-07-31 Tcell DMSO control cell2-1lamellipodium					2019-07-31 Tcell DMSO control cell2-1 cell body					2019-07-31 Tcell DMSO control cell3-1lamellipodium					2019-07-31 Tcell DMSO control cell3-1 cell body					2019-07-31 Tcell DMSO control cell4-1lamellipodium					2019-07-31 Tcell DMSO control cell4-1 cell body					2019-07-31 Tcell DMSO control cell5-1lamellipodium					2019-07-31 Tcell DMSO control cell5-1 cell body
	Average	220.014				Average	23.5381				Average	137.993				Average	28.1596				Average	207.964				Average	24.6597				Average	263.444				Average	93.8264				Average	151.984				Average	25.1779
	StDev	63.2522				StDev	8.82974				StDev	37.1541				StDev	12.2624				StDev	53.7762				StDev	9.34851				StDev	43.334				StDev	27.6521				StDev	36.48				StDev	11.3426
			setp					setp					setp					setp					setp					setp					setp					setp					setp					setp
	kPa	%				kPa	%				kPa	%				kPa	%				kPa	%				kPa	%				kPa	%				kPa	%				kPa	%				kPa	%
0			0		0			0		0			0		0			0		0			0		0			0		0			0		0			0		0			0		0			0
0	0	2.22222	1075.69		0	0	1.0101	5.59639		0	0	2.77778	528.945		0	0	2.77778	22.0268		0	0	2.38095	1029.74		0	0	0.549451	3.3412		0	0	1.13636	788.67		0	0	0.925926	81.5129		0	0	1.13636	262.489		0	0	1.13636	7.20371
0			0		0			0		0			0		0			0		0			0		0			0		0			0		0			0		0			0		0			0
0	0.606619	0	0		0	0.0856403	0	0		0	0.406792	0	0		0	0.0963454	0	0		0	0.531684	0	0		0	0.0963454	0	0		0	0.674418	0	0		0	0.285468	0	0		0	0.520979	0	0		0	0.0963454	0	0
0			0		0			0		0			0		0			0		0			0		0			0		0			0		0			0		0			0		0			0
0	1.21324	0	0		0	0.171281	0	0		0	0.813583	0	0		0	0.192691	0	0		0	1.06337	0	0		0	0.192691	0	0		0	1.34884	0	0		0	0.570936	0	0		0	1.04196	0	0		0	0.192691	0	0
0			0		0			0		0			0		0			0		0			0		0			0		0			0		0			0		0			0		0			0
0	1.81986	0	0		0	0.256921	0	0		0	1.22037	0	0		0	0.289036	0	0		0	1.59505	0	0		0	0.289036	0	0		0	2.02325	0	0		0	0.856403	0	0		0	1.56294	0	0		0	0.289036	0	0
0			0		0			0		0			0		0			0		0			0		0			0		0			0		0			0		0			0		0			0
0	2.42648	0	0		0	0.342561	0	0		0	1.62717	0	0		0	0.385381	0	0		0	2.12674	0	0		0	0.385381	0	0		0	2.69767	0	0		0	1.14187	0	0		0	2.08392	0	0		0	0.385381	0	0
0			0		0			0		0			0		0			0		0			0		0			0		0			0		0			0		0			0		0			0
0	3.03309	0	0		0	0.428202	0	0		0	2.03396	0	0		0	0.481727	0	0		0	2.65842	0	0		0	0.481727	0	0		0	3.37209	0	0		0	1.42734	0	0		0	2.60489	0	0		0	0.481727	0	0
0			0		0			0		0			0		0			0		0			0		0			0		0			0		0			0		0			0		0			0
0	3.63971	0	0		0	0.513842	0	0		0	2.44075	0	0		0	0.578072	0	0		0	3.1901	0	0		0	0.578072	0	0		0	4.04651	0	0		0	1.71281	0	0		0	3.12587	0	0		0	0.578072	0	0
0			0		0			0		0			0		0			0		0			0		0			0		0			0		0			0		0			0		0			0
0	4.24633	0	0		0	0.599482	0	0		0	2.84754	0	0		0	0.674418	0	0		0	3.72179	0	0		0	0.674418	0	0		0	4.72092	0	0		0	1.99828	0	0		0	3.64685	0	0		0	0.674418	0	0
0			0		0			0		0			0		0			0		0			0		0			0		0			0		0			0		0			0		0			0
0	4.85295	0	0		0	0.685123	0	0		0	3.25433	0	0		0	0.770763	0	0		0	4.25347	0	0		0	0.770763	0	0		0	5.39534	0	0		0	2.28374	0	0		0	4.16783	0	0		0	0.770763	0	0
0			0		0			0		0			0		0			0		0			0		0			0		0			0		0			0		0			0		0			0
0	5.45957	0	0		0	0.770763	0	0		0	3.66112	0	0		0	0.867108	0	0		0	4.78515	0	0		0	0.867108	0	0		0	6.06976	0	0		0	2.56921	0	0		0	4.68881	0	0		0	0.867108	0	0
0			0		0			0		0			0		0			0		0			0		0			0		0			0		0			0		0			0		0			0
0	6.06619	0	0		0	0.856403	0	0		0	4.06792	0	0		0	0.963454	0	0		0	5.31684	0	0		0	0.963454	0	0		0	6.74418	0	0		0	2.85468	0	0		0	5.20979	0	0		0	0.963454	0	0
0			0		0			0		0			0		0			0		0			0		0			0		0			0		0			0		0			0		0			0
0	6.67281	0	0		0	0.942044	0	0		0	4.47471	0	0		0	1.0598	0	0		0	5.84852	0	0		0	1.0598	0	0		0	7.41859	0	0		0	3.14015	0	0		0	5.73077	0	0		0	1.0598	0	0
0			0		0			0		0			0		0			0		0			0		0			0		0			0		0			0		0			0		0			0
0	7.27943	0	0		0	1.02768	0	0		0	4.8815	0	0		0	1.15614	0	0		0	6.38021	0	0		0	1.15614	0	0		0	8.09301	0	0		0	3.42561	0	0		0	6.25174	0	0		0	1.15614	0	0
0			0		0			0		0			0		0			0		0			0		0			0		0			0		0			0		0			0		0			0
0	7.88605	0	0		0	1.11332	0	0		0	5.28829	0	0		0	1.25249	0	0		0	6.91189	0	0		0	1.25249	0	0		0	8.76743	0	0		0	3.71108	0	0		0	6.77272	0	0		0	1.25249	0	0
0			0		0			0		0			0		0			0		0			0		0			0		0			0		0			0		0			0		0			0
0	8.49267	0	0		0	1.19897	0	0		0	5.69508	0	0		0	1.34884	0	0		0	7.44357	0	0		0	1.34884	0	0		0	9.44185	0	0		0	3.99655	0	0		0	7.2937	0	0		0	1.34884	0	0
0			0		0			0		0			0		0			0		0			0		0			0		0			0		0			0		0			0		0			0
0	9.09929	0	0		0	1.2846	0	0		0	6.10187	0	0		0	1.44518	0	0		0	7.97526	0	0		0	1.44518	0	0		0	10.1163	0	0		0	4.28202	0	0		0	7.81468	0	0		0	1.44518	0	0
0			0		0			0		0			0		0			0		0			0		0			0		0			0		0			0		0			0		0			0
0	9.7059	0	0		0	1.37024	0	0		0	6.50867	0	0		0	1.54153	0	0		0	8.50694	0	0		0	1.54153	0	0		0	10.7907	0	0		0	4.56748	0	0		0	8.33566	0	0		0	1.54153	0	0
0			0		0			0		0			0		0			0		0			0		0			0		0			0		0			0		0			0		0			0
0	10.3125	0	0		0	1.45589	0	0		0	6.91546	0	0		0	1.63787	0	0		0	9.03862	0	0		0	1.63787	0	0		0	11.4651	0	0		0	4.85295	0	0		0	8.85664	0	0		0	1.63787	0	0
0			0		0			0		0			0		0			0		0			0		0			0		0			0		0			0		0			0		0			0
0	10.9191	0	0		0	1.54153	0	0		0	7.32225	0	0		0	1.73422	0	0		0	9.57031	0	0		0	1.73422	0	0		0	12.1395	0	0		0	5.13842	0	0		0	9.37762	0	0		0	1.73422	0	0
0			0		0			0		0			0		0			0		0			0		0			0		0			0		0			0		0			0		0			0
0	11.5258	0	0		0	1.62717	0	0		0	7.72904	0	0		0	1.83056	0	0		0	10.102	0	0		0.010058	1.83056	0.549451	2.86356		0	12.8139	0	0		0	5.42389	0	0		0	9.8986	0	0		0.0416037	1.83056	2.27273	12.3886
0			0		0			0		0			0		0			0		0			0		0			0		0			0		0			0		0			0		0			0
0	12.1324	0	0		0	1.71281	0	0		0	8.13583	0	0		0	1.92691	0	0		0	10.6337	0	0		0	1.92691	0	0		0	13.4884	0	0		0	5.70936	0	0		0	10.4196	0	0		0	1.92691	0	0
0			0		0			0		0			0		0			0		0			0		0			0		0			0		0			0		0			0		0			0
0	12.739	0	0		0	1.79845	0	0		0	8.54262	0	0		0	2.02325	0	0		0	11.1654	0	0		0	2.02325	0	0		0	14.1628	0	0		0	5.99482	0	0		0	10.9405	0	0		0	2.02325	0	0
0			0		0			0		0			0		0			0		0			0		0			0		0			0		0			0		0			0		0			0
0	13.3456	0	0		0	1.88409	0	0		0	8.94942	0	0		0	2.1196	0	0		0	11.697	0	0		0	2.1196	0	0		0	14.8372	0	0		0	6.28029	0	0		0	11.4615	0	0		0	2.1196	0	0
0			0		0			0		0			0		0			0		0			0		0			0		0			0		0			0		0			0		0			0
0	13.9522	0	0		0	1.96973	0	0		0	9.35621	0	0		0	2.21594	0	0		0	12.2287	0	0		0	2.21594	0	0		0	15.5116	0	0		0	6.56576	0	0		0	11.9825	0	0		0	2.21594	0	0
0			0		0			0		0			0		0			0		0			0		0			0		0			0		0			0		0			0		0			0
0	14.5589	0	0		0	2.05537	0	0		0	9.763	0	0		0	2.31229	0	0		0.303819	12.7604	2.38095	907.251		0	2.31229	0	0		0	16.186	0	0		0	6.85123	0	0		0	12.5035	0	0		0	2.31229	0	0
0			0		0			0		0			0		0			0		0			0		0			0		0			0		0			0		0			0		0			0
0	15.1655	0	0		0	2.14101	0	0		0	10.1698	0	0		0	2.40863	0	0		0	13.2921	0	0		0	2.40863	0	0		0	16.8604	0	0		0	7.13669	0	0		0	13.0245	0	0		0	2.40863	0	0
0			0		0			0		0			0		0			0		0			0		0			0		0			0		0			0		0			0		0			0
0	15.7721	0	0		0	2.22665	0	0		0	10.5766	0	0		0	2.50498	0	0		0	13.8238	0	0		0	2.50498	0	0		0	17.5349	0	0		0	7.42216	0	0		0	13.5455	0	0		0	2.50498	0	0
0			0		0			0		0			0		0			0		0			0		0			0		0			0		0			0		0			0		0			0
0	16.3787	0	0		0	2.31229	0	0		0	10.9834	0	0		0	2.60133	0	0		0	14.3555	0	0		0	2.60133	0	0		0	18.2093	0	0		0	7.70763	0	0		0	14.0664	0	0		0	2.60133	0	0
0			0		0			0		0			0		0			0		0			0		0			0		0			0		0			0		0			0		0			0
0	16.9853	0	0		0	2.39793	0	0		0	11.3902	0	0		0	2.69767	0	0		0	14.8872	0	0		0	2.69767	0	0		0	18.8837	0	0		0	7.9931	0	0		0	14.5874	0	0		0	2.69767	0	0
0			0		0			0		0			0		0			0		0			0		0			0		0			0		0			0		0			0		0			0
0	17.592	0	0		0	2.48357	0	0		0	11.797	0	0		0	2.79402	0	0		0	15.4188	0	0		0	2.79402	0	0		0	19.5581	0	0		0	8.27857	0	0		0	15.1084	0	0		0	2.79402	0	0
0			0		0			0		0			0		0			0		0			0		0			0		0			0		0			0		0			0		0			0
0	18.1986	0	0		0	2.56921	0	0		0	12.2037	0	0		0	2.89036	0	0		0	15.9505	0	0		0	2.89036	0	0		0	20.2325	0	0		0	8.56403	0	0		0	15.6294	0	0		0	2.89036	0	0
0			0		0			0		0			0		0			0		0			0		0			0		0			0		0			0		0			0		0			0
0	18.8052	0	0		0	2.65485	0	0		0	12.6105	0	0		0	2.98671	0	0		0	16.4822	0	0		0	2.98671	0	0		0	20.9069	0	0		0	8.8495	0	0		0	16.1503	0	0		0	2.98671	0	0
0			0		0			0		0			0		0			0		0			0		0			0		0			0		0			0		0			0		0			0
0	19.4118	0	0		0	2.74049	0	0		0	13.0173	0	0		0	3.08305	0	0		0	17.0139	0	0		0	3.08305	0	0		0	21.5814	0	0		0	9.13497	0	0		0	16.6713	0	0		0	3.08305	0	0
0			0		0			0		0			0		0			0		0			0		0			0		0			0		0			0		0			0		0			0
0	20.0184	0	0		0	2.82613	0	0		0	13.4241	0	0		0	3.1794	0	0		0	17.5456	0	0		0	3.1794	0	0		0	22.2558	0	0		0	9.42044	0	0		0	17.1923	0	0		0	3.1794	0	0
0			0		0			0		0			0		0			0		0			0		0			0		0			0		0			0		0			0		0			0
0	20.6251	0	0		0	2.91177	0	0		0	13.8309	0	0		0	3.27574	0	0		0	18.0772	0	0		0	3.27574	0	0		0	22.9302	0	0		0	9.7059	0	0		0	17.7133	0	0		0	3.27574	0	0
0			0		0			0		0			0		0			0		0			0		0			0		0			0		0			0		0			0		0			0
0	21.2317	0	0		0	2.99741	0	0		0	14.2377	0	0		0	3.37209	0	0		0	18.6089	0	0		0	3.37209	0	0		0	23.6046	0	0		0	9.99137	0	0		0	18.2343	0	0		0	3.37209	0	0
0			0		0			0		0			0		0			0		0			0		0			0		0			0		0			0		0			0		0			0
0	21.8383	0	0		0	3.08305	0	0		0	14.6445	0	0		0	3.46843	0	0		0	19.1406	0	0		0	3.46843	0	0		0	24.279	0	0		0	10.2768	0	0		0	18.7552	0	0		0	3.46843	0	0
0			0		0			0		0			0		0			0		0			0		0			0		0			0		0			0		0			0		0			0
0	22.4449	0	0		0	3.16869	0	0		0	15.0513	0	0		0	3.56478	0	0		0	19.6723	0	0		0	3.56478	0	0		0	24.9535	0	0		0	10.5623	0	0		0	19.2762	0	0		0	3.56478	0	0
0			0		0			0		0			0		0			0		0			0		0			0		0			0		0			0		0			0		0			0
0	23.0515	0	0		0	3.25433	0	0		0	15.4581	0	0		0	3.66112	0	0		0	20.204	0	0		0.0402321	3.66112	1.0989	4.84547		0	25.6279	0	0		0	10.8478	0	0		0	19.7972	0	0		0.0416037	3.66112	1.13636	5.26104
0			0		0			0		0			0		0			0		0			0		0			0		0			0		0			0		0			0		0			0
0	23.6581	0	0		0	3.33997	0	0		0	15.8649	0	0		0	3.75747	0	0		0	20.7357	0	0		0	3.75747	0	0		0	26.3023	0	0		0	11.1332	0	0		0	20.3182	0	0		0	3.75747	0	0
0			0		0			0		0			0		0			0		0			0		0			0		0			0		0			0		0			0		0			0
0	24.2648	0	0		0	3.42561	0	0		0	16.2717	0	0		0	3.85381	0	0		0	21.2674	0	0		0	3.85381	0	0		0	26.9767	0	0		0	11.4187	0	0		0	20.8392	0	0		0	3.85381	0	0
0			0		0			0		0			0		0			0		0			0		0			0		0			0		0			0		0			0		0			0
0	24.8714	0	0		0	3.51125	0	0		0	16.6785	0	0		0	3.95016	0	0		0	21.799	0	0		0	3.95016	0	0		0	27.6511	0	0		0	11.7042	0	0		0	21.3601	0	0		0	3.95016	0	0
0			0		0			0		0			0		0			0		0			0		0			0		0			0		0			0		0			0		0			0
0	25.478	0	0		0	3.59689	0	0		0	17.0852	0	0		0	4.04651	0	0		0	22.3307	0	0		0	4.04651	0	0		0	28.3255	0	0		0	11.9896	0	0		0	21.8811	0	0		0	4.04651	0	0
0			0		0			0		0			0		0			0		0			0		0			0		0			0		0			0		0			0		0			0
0	26.0846	0	0		0.0371973	3.68254	1.0101	3.98226		0	17.492	0	0		0	4.14285	0	0		0	22.8624	0	0		0	4.14285	0	0		0	29	0	0		0	12.2751	0	0		0	22.4021	0	0		0	4.14285	0	0
0			0		0			0		0			0		0			0		0			0		0			0		0			0		0			0		0			0		0			0
0	26.6912	0	0		0	3.76817	0	0		0	17.8988	0	0		0	4.2392	0	0		0	23.3941	0	0		0	4.2392	0	0		0	29.6744	0	0		0	12.5606	0	0		0	22.9231	0	0		0	4.2392	0	0
0			0		0			0		0			0		0			0		0			0		0			0		0			0		0			0		0			0		0			0
0	27.2979	0	0		0	3.85381	0	0		0	18.3056	0	0		0	4.33554	0	0		0	23.9258	0	0		0	4.33554	0	0		0	30.3488	0	0		0	12.846	0	0		0	23.444	0	0		0	4.33554	0	0
0			0		0			0		0			0		0			0		0			0		0			0		0			0		0			0		0			0		0			0
0	27.9045	0	0		0	3.93946	0	0		0	18.7124	0	0		0	4.43189	0	0		0	24.4575	0	0		0	4.43189	0	0		0	31.0232	0	0		0	13.1315	0	0		0	23.965	0	0		0	4.43189	0	0
0			0		0			0		0			0		0			0		0			0		0			0		0			0		0			0		0			0		0			0
0	28.5111	0	0		0	4.0251	0	0		0	19.1192	0	0		0	4.52823	0	0		0	24.9891	0	0		0	4.52823	0	0		0	31.6976	0	0		0	13.417	0	0		0	24.486	0	0		0	4.52823	0	0
0			0		0			0		0			0		0			0		0			0		0			0		0			0		0			0		0			0		0			0
0	29.1177	0	0		0	4.11074	0	0		0	19.526	0	0		0	4.62458	0	0		0	25.5208	0	0		0	4.62458	0	0		0	32.3721	0	0		0	13.7025	0	0		0	25.007	0	0		0	4.62458	0	0
0			0		0			0		0			0		0			0		0			0		0			0		0			0		0			0		0			0		0			0
0	29.7243	0	0		0	4.19638	0	0		0	19.9328	0	0		0	4.72092	0	0		0	26.0525	0	0		0	4.72092	0	0		0	33.0465	0	0		0	13.9879	0	0		0	25.528	0	0		0	4.72092	0	0
0			0		0			0		0			0		0			0		0			0		0			0		0			0		0			0		0			0		0			0
0	30.331	0	0		0	4.28202	0	0		0	20.3396	0	0		0	4.81727	0	0		0	26.5842	0	0		0	4.81727	0	0		0	33.7209	0	0		0	14.2734	0	0		0	26.0489	0	0		0	4.81727	0	0
0			0		0			0		0			0		0			0		0			0		0			0		0			0		0			0		0			0		0			0
0	30.9376	0	0		0	4.36766	0	0		0	20.7464	0	0		0	4.91361	0	0		0	27.1159	0	0		0	4.91361	0	0		0	34.3953	0	0		0	14.5589	0	0		0	26.5699	0	0		0	4.91361	0	0
0			0		0			0		0			0		0			0		0			0		0			0		0			0		0			0		0			0		0			0
0	31.5442	0	0		0	4.4533	0	0		0	21.1532	0	0		0	5.00996	0	0		0	27.6476	0	0		0	5.00996	0	0		0	35.0697	0	0		0	14.8443	0	0		0	27.0909	0	0		0	5.00996	0	0
0			0		0			0		0			0		0			0		0			0		0			0		0			0		0			0		0			0		0			0
0	32.1508	0	0		0	4.53894	0	0		0	21.56	0	0		0	5.1063	0	0		0	28.1792	0	0		0	5.1063	0	0		0	35.7441	0	0		0	15.1298	0	0		0	27.6119	0	0		0	5.1063	0	0
0			0		0			0		0			0		0			0		0			0		0			0		0			0		0			0		0			0		0			0
0	32.7574	0	0		0	4.62458	0	0		0	21.9668	0	0		0	5.20265	0	0		0	28.7109	0	0		0	5.20265	0	0		0	36.4186	0	0		0	15.4153	0	0		0	28.1329	0	0		0	5.20265	0	0
0			0		0			0		0			0		0			0		0			0		0			0		0			0		0			0		0			0		0			0
0	33.364	0	0		0	4.71022	0	0		0	22.3735	0	0		0	5.299	0	0		0	29.2426	0	0		0	5.299	0	0		0	37.093	0	0		0	15.7007	0	0		0	28.6538	0	0		0	5.299	0	0
0			0		0			0		0			0		0			0		0			0		0			0		0			0		0			0		0			0		0			0
0	33.9707	0	0		0	4.79586	0	0		0	22.7803	0	0		0	5.39534	0	0		0	29.7743	0	0		0	5.39534	0	0		0	37.7674	0	0		0	15.9862	0	0		0	29.1748	0	0		0	5.39534	0	0
0			0		0			0		0			0		0			0		0			0		0			0		0			0		0			0		0			0		0			0
0	34.5773	0	0		0	4.8815	0	0		0	23.1871	0	0		0	5.49169	0	0		0	30.306	0	0		0.0301741	5.49169	0.549451	2.01874		0	38.4418	0	0		0	16.2717	0	0		0	29.6958	0	0		0.124811	5.49169	2.27273	8.80788
0			0		0			0		0			0		0			0		0			0		0			0		0			0		0			0		0			0		0			0
0	35.1839	0	0		0	4.96714	0	0		0	23.5939	0	0		0	5.58803	0	0		0	30.8377	0	0		0	5.58803	0	0		0	39.1162	0	0		0	16.5571	0	0		0	30.2168	0	0		0	5.58803	0	0
0			0		0			0		0			0		0			0		0			0		0			0		0			0		0			0		0			0		0			0
0	35.7905	0	0		0	5.05278	0	0		0	24.0007	0	0		0	5.68438	0	0		0	31.3693	0	0		0	5.68438	0	0		0	39.7906	0	0		0	16.8426	0	0		0	30.7377	0	0		0	5.68438	0	0
0			0		0			0		0			0		0			0		0			0		0			0		0			0		0			0		0			0		0			0
0	36.3971	0	0		0	5.13842	0	0		0	24.4075	0	0		0	5.78072	0	0		0	31.901	0	0		0	5.78072	0	0		0	40.4651	0	0		0	17.1281	0	0		0	31.2587	0	0		0	5.78072	0	0
0			0		0			0		0			0		0			0		0			0		0			0		0			0		0			0		0			0		0			0
0	37.0038	0	0		0	5.22406	0	0		0	24.8143	0	0		0	5.87707	0	0		0	32.4327	0	0		0	5.87707	0	0		0	41.1395	0	0		0	17.4135	0	0		0	31.7797	0	0		0	5.87707	0	0
0			0		0			0		0			0		0			0		0			0		0			0		0			0		0			0		0			0		0			0
0	37.6104	0	0		0	5.3097	0	0		0	25.2211	0	0		0	5.97341	0	0		0	32.9644	0	0		0	5.97341	0	0		0	41.8139	0	0		0	17.699	0	0		0	32.3007	0	0		0	5.97341	0	0
0			0		0			0		0			0		0			0		0			0		0			0		0			0		0			0		0			0		0			0
0	38.217	0	0		0	5.39534	0	0		0	25.6279	0	0		0	6.06976	0	0		0	33.4961	0	0		0	6.06976	0	0		0	42.4883	0	0		0	17.9845	0	0		0	32.8217	0	0		0	6.06976	0	0
0			0		0			0		0			0		0			0		0			0		0			0		0			0		0			0		0			0		0			0
0	38.8236	0	0		0	5.48098	0	0		0	26.0347	0	0		0	6.1661	0	0		0	34.0278	0	0		0	6.1661	0	0		0	43.1627	0	0		0	18.2699	0	0		0	33.3426	0	0		0	6.1661	0	0
0			0		0			0		0			0		0			0		0			0		0			0		0			0		0			0		0			0		0			0
0	39.4302	0	0		0	5.56662	0	0		0	26.4415	0	0		0	6.26245	0	0		0	34.5594	0	0		0	6.26245	0	0		0	43.8372	0	0		0	18.5554	0	0		0	33.8636	0	0		0	6.26245	0	0
0			0		0			0		0			0		0			0		0			0		0			0		0			0		0			0		0			0		0			0
0	40.0369	0	0		0	5.65226	0	0		0	26.8483	0	0		0	6.35879	0	0		0	35.0911	0	0		0	6.35879	0	0		0	44.5116	0	0		0	18.8409	0	0		0	34.3846	0	0		0	6.35879	0	0
0			0		0			0		0			0		0			0		0			0		0			0		0			0		0			0		0			0		0			0
0	40.6435	0	0		0	5.7379	0	0		0	27.255	0	0		0	6.45514	0	0		0	35.6228	0	0		0	6.45514	0	0		0	45.186	0	0		0	19.1263	0	0		0	34.9056	0	0		0	6.45514	0	0
0			0		0			0		0			0		0			0		0			0		0			0		0			0		0			0		0			0		0			0
0	41.2501	0	0		0	5.82354	0	0		0	27.6618	0	0		0	6.55149	0	0		0	36.1545	0	0		0	6.55149	0	0		0	45.8604	0	0		0	19.4118	0	0		0	35.4265	0	0		0	6.55149	0	0
0			0		0			0		0			0		0			0		0			0		0			0		0			0		0			0		0			0		0			0
0	41.8567	0	0		0	5.90918	0	0		0	28.0686	0	0		0	6.64783	0	0		0	36.6862	0	0		0	6.64783	0	0		0	46.5348	0	0		0	19.6973	0	0		0	35.9475	0	0		0	6.64783	0	0
0			0		0			0		0			0		0			0		0			0		0			0		0			0		0			0		0			0		0			0
0	42.4633	0	0		0	5.99482	0	0		0	28.4754	0	0		0	6.74418	0	0		0	37.2179	0	0		0	6.74418	0	0		0	47.2092	0	0		0	19.9827	0	0		0	36.4685	0	0		0	6.74418	0	0
0			0		0			0		0			0		0			0		0			0		0			0		0			0		0			0		0			0		0			0
0	43.0699	0	0		0	6.08046	0	0		0	28.8822	0	0		0	6.84052	0	0		0	37.7495	0	0		0	6.84052	0	0		0	47.8837	0	0		0	20.2682	0	0		0	36.9895	0	0		0	6.84052	0	0
0			0		0			0		0			0		0			0		0			0		0			0		0			0		0			0		0			0		0			0
0	43.6766	0	0		0	6.1661	0	0		0	29.289	0	0		0	6.93687	0	0		0	38.2812	0	0		0	6.93687	0	0		0	48.5581	0	0		0	20.5537	0	0		0	37.5105	0	0		0	6.93687	0	0
0			0		0			0		0			0		0			0		0			0		0			0		0			0		0			0		0			0		0			0
0	44.2832	0	0		0	6.25174	0	0		0	29.6958	0	0		0	7.03321	0	0		0	38.8129	0	0		0	7.03321	0	0		0	49.2325	0	0		0	20.8392	0	0		0	38.0314	0	0		0	7.03321	0	0
0			0		0			0		0			0		0			0		0			0		0			0		0			0		0			0		0			0		0			0
0	44.8898	0	0		0	6.33739	0	0		0	30.1026	0	0		0	7.12956	0	0		0	39.3446	0	0		0	7.12956	0	0		0	49.9069	0	0		0	21.1246	0	0		0	38.5524	0	0		0	7.12956	0	0
0			0		0			0		0			0		0			0		0			0		0			0		0			0		0			0		0			0		0			0
0	45.4964	0	0		0	6.42302	0	0		0	30.5094	0	0		0	7.2259	0	0		0	39.8763	0	0		0	7.2259	0	0		0	50.5813	0	0		0	21.4101	0	0		0	39.0734	0	0		0	7.2259	0	0
0			0		0			0		0			0		0			0		0			0		0			0		0			0		0			0		0			0		0			0
0	46.1031	0	0		0	6.50867	0	0		0	30.9162	0	0		0.203396	7.32225	2.77778	12.061		0	40.408	0	0		0.120696	7.32225	1.64835	4.95471		0	51.2557	0	0		0	21.6956	0	0		0	39.5944	0	0		0.0832074	7.32225	1.13636	3.623
0			0		0			0		0			0		0			0		0			0		0			0		0			0		0			0		0			0		0			0
0	46.7097	0	0		0	6.59431	0	0		0	31.3229	0	0		0	7.41859	0	0		0	40.9397	0	0		0	7.41859	0	0		0	51.9302	0	0		0	21.981	0	0		0	40.1154	0	0		0	7.41859	0	0
0			0		0			0		0			0		0			0		0			0		0			0		0			0		0			0		0			0		0			0
0	47.3163	0	0		0	6.67995	0	0		0	31.7297	0	0		0	7.51494	0	0		0	41.4713	0	0		0	7.51494	0	0		0	52.6046	0	0		0	22.2665	0	0		0	40.6363	0	0		0	7.51494	0	0
0			0		0			0		0			0		0			0		0			0		0			0		0			0		0			0		0			0		0			0
0	47.9229	0	0		0	6.76559	0	0		0	32.1365	0	0		0	7.61129	0	0		0	42.003	0	0		0	7.61129	0	0		0	53.279	0	0		0	22.552	0	0		0	41.1573	0	0		0	7.61129	0	0
0			0		0			0		0			0		0			0		0			0		0			0		0			0		0			0		0			0		0			0
0	48.5295	0	0		0	6.85123	0	0		0	32.5433	0	0		0	7.70763	0	0		0	42.5347	0	0		0	7.70763	0	0		0	53.9534	0	0		0	22.8374	0	0		0	41.6783	0	0		0	7.70763	0	0
0			0		0			0		0			0		0			0		0			0		0			0		0			0		0			0		0			0		0			0
0	49.1361	0	0		0	6.93687	0	0		0	32.9501	0	0		0	7.80398	0	0		0	43.0664	0	0		0	7.80398	0	0		0	54.6278	0	0		0	23.1229	0	0		0	42.1993	0	0		0	7.80398	0	0
0			0		0			0		0			0		0			0		0			0		0			0		0			0		0			0		0			0		0			0
0	49.7428	0	0		0	7.02251	0	0		0	33.3569	0	0		0	7.90032	0	0		0	43.5981	0	0		0	7.90032	0	0		0	55.3023	0	0		0	23.4084	0	0		0	42.7203	0	0		0	7.90032	0	0
0			0		0			0		0			0		0			0		0			0		0			0		0			0		0			0		0			0		0			0
0	50.3494	0	0		0	7.10815	0	0		0	33.7637	0	0		0	7.99667	0	0		0	44.1298	0	0		0	7.99667	0	0		0	55.9767	0	0		0.219387	23.6938	0.925926	45.5424		0	43.2412	0	0		0	7.99667	0	0
0			0		0			0		0			0		0			0		0			0		0			0		0			0		0			0		0			0		0			0
0	50.956	0	0		0	7.19379	0	0		0	34.1705	0	0		0	8.09301	0	0		0	44.6614	0	0		0	8.09301	0	0		0	56.6511	0	0		0	23.9793	0	0		0	43.7622	0	0		0	8.09301	0	0
0			0		0			0		0			0		0			0		0			0		0			0		0			0		0			0		0			0		0			0
0	51.5626	0	0		0.147059	7.27943	2.0202	5.3403		0	34.5773	0	0		0	8.18936	0	0		0	45.1931	0	0		0	8.18936	0	0		0	57.3255	0	0		0	24.2648	0	0		0	44.2832	0	0		0	8.18936	0	0
0			0		0			0		0			0		0			0		0			0		0			0		0			0		0			0		0			0		0			0
0	52.1692	0	0		0	7.36507	0	0		0	34.9841	0	0		0	8.2857	0	0		0	45.7248	0	0		0	8.2857	0	0		0	57.9999	0	0		0	24.5502	0	0		0	44.8042	0	0		0	8.2857	0	0
0			0		0			0		0			0		0			0		0			0		0			0		0			0		0			0		0			0		0			0
0	52.7759	0	0		0	7.45071	0	0		0	35.3909	0	0		0	8.38205	0	0		0	46.2565	0	0		0	8.38205	0	0		0	58.6743	0	0		0	24.8357	0	0		0	45.3252	0	0		0	8.38205	0	0
0			0		0			0		0			0		0			0		0			0		0			0		0			0		0			0		0			0		0			0
0	53.3825	0	0		0	7.53635	0	0		0	35.7977	0	0		0	8.47839	0	0		0	46.7882	0	0		0	8.47839	0	0		0	59.3488	0	0		0	25.1212	0	0		0	45.8461	0	0		0	8.47839	0	0
0			0		0			0		0			0		0			0		0			0		0			0		0			0		0			0		0			0		0			0
0	53.9891	0	0		0	7.62199	0	0		0	36.2045	0	0		0	8.57474	0	0		0	47.3199	0	0		0	8.57474	0	0		0	60.0232	0	0		0	25.4066	0	0		0	46.3671	0	0		0	8.57474	0	0
0			0		0			0		0			0		0			0		0			0		0			0		0			0		0			0		0			0		0			0
1.21324	54.5957	2.22222	608.071		0	7.70763	0	0		0	36.6112	0	0		0	8.67108	0	0		0	47.8515	0	0		0	8.67108	0	0		0	60.6976	0	0		0	25.6921	0	0		0	46.8881	0	0		0	8.67108	0	0
0			0		0			0		0			0		0			0		0			0		0			0		0			0		0			0		0			0		0			0
0	55.2023	0	0		0	7.79327	0	0		0	37.018	0	0		0	8.76743	0	0		0	48.3832	0	0		0	8.76743	0	0		0	61.372	0	0		0	25.9776	0	0		0	47.4091	0	0		0	8.76743	0	0
0			0		0			0		0			0		0			0		0			0		0			0		0			0		0			0		0			0		0			0
0	55.809	0	0		0	7.87891	0	0		0	37.4248	0	0		0	8.86378	0	0		0	48.9149	0	0		0	8.86378	0	0		0	62.0464	0	0		0	26.263	0	0		0	47.93	0	0		0	8.86378	0	0
0			0		0			0		0			0		0			0		0			0		0			0		0			0		0			0		0			0		0			0
0	56.4156	0	0		0	7.96455	0	0		0	37.8316	0	0		0	8.96012	0	0		0	49.4466	0	0		0	8.96012	0	0		0	62.7208	0	0		0	26.5485	0	0		0	48.451	0	0		0	8.96012	0	0
0			0		0			0		0			0		0			0		0			0		0			0		0			0		0			0		0			0		0			0
0	57.0222	0	0		0	8.05019	0	0		0	38.2384	0	0		0	9.05647	0	0		0	49.9783	0	0		0	9.05647	0	0		0	63.3953	0	0		0	26.834	0	0		0	48.972	0	0		0	9.05647	0	0
0			0		0			0		0			0		0			0		0			0		0			0		0			0		0			0		0			0		0			0
0	57.6288	0	0		0	8.13583	0	0		0	38.6452	0	0		0.50849	9.15281	5.55556	20.0699		0	50.51	0	0		0.201161	9.15281	2.1978	5.28488		0	64.0697	0	0		0	27.1194	0	0		0	49.493	0	0		0.208018	9.15281	2.27273	5.83644
0			0		0			0		0			0		0			0		0			0		0			0		0			0		0			0		0			0		0			0
0	58.2354	0	0		0	8.22147	0	0		0	39.052	0	0		0	9.24916	0	0		0	51.0416	0	0		0	9.24916	0	0		0	64.7441	0	0		0	27.4049	0	0		0	50.014	0	0		0	9.24916	0	0
0			0		0			0		0			0		0			0		0			0		0			0		0			0		0			0		0			0		0			0
0	58.8421	0	0		0	8.30711	0	0		0	39.4588	0	0		0	9.3455	0	0		0	51.5733	0	0		0	9.3455	0	0		0	65.4185	0	0		0	27.6904	0	0		0	50.5349	0	0		0	9.3455	0	0
0			0		0			0		0			0		0			0		0			0		0			0		0			0		0			0		0			0		0			0
0	59.4487	0	0		0	8.39275	0	0		0	39.8656	0	0		0	9.44185	0	0		0	52.105	0	0		0	9.44185	0	0		0	66.0929	0	0		0	27.9759	0	0		0	51.0559	0	0		0	9.44185	0	0
0			0		0			0		0			0		0			0		0			0		0			0		0			0		0			0		0			0		0			0
0	60.0553	0	0		0	8.47839	0	0		0	40.2724	0	0		0	9.53819	0	0		0	52.6367	0	0		0	9.53819	0	0		0	66.7673	0	0		0	28.2613	0	0		0	51.5769	0	0		0	9.53819	0	0
0			0		0			0		0			0		0			0		0			0		0			0		0			0		0			0		0			0		0			0
0	60.6619	0	0		0	8.56403	0	0		0	40.6792	0	0		0	9.63454	0	0		0	53.1684	0	0		0	9.63454	0	0		0	67.4418	0	0		0	28.5468	0	0		0	52.0979	0	0		0	9.63454	0	0
0			0		0			0		0			0		0			0		0			0		0			0		0			0		0			0		0			0		0			0
0	61.2685	0	0		0	8.64968	0	0		0	41.0859	0	0		0	9.73088	0	0		0	53.7001	0	0		0	9.73088	0	0		0	68.1162	0	0		0	28.8322	0	0		0	52.6189	0	0		0	9.73088	0	0
0			0		0			0		0			0		0			0		0			0		0			0		0			0		0			0		0			0		0			0
0	61.8751	0	0		0	8.73531	0	0		0	41.4928	0	0		0	9.82723	0	0		0	54.2317	0	0		0	9.82723	0	0		0	68.7906	0	0		0	29.1177	0	0		0	53.1398	0	0		0	9.82723	0	0
0			0		0			0		0			0		0			0		0			0		0			0		0			0		0			0		0			0		0			0
0	62.4818	0	0		0	8.82095	0	0		0	41.8995	0	0		0	9.92357	0	0		0	54.7634	0	0		0	9.92357	0	0		0	69.465	0	0		0	29.4032	0	0		0	53.6608	0	0		0	9.92357	0	0
0			0		0			0		0			0		0			0		0			0		0			0		0			0		0			0		0			0		0			0
0	63.0884	0	0		0	8.9066	0	0		0	42.3063	0	0		0	10.0199	0	0		0	55.2951	0	0		0	10.0199	0	0		0	70.1394	0	0		0	29.6886	0	0		0	54.1818	0	0		0	10.0199	0	0
0			0		0			0		0			0		0			0		0			0		0			0		0			0		0			0		0			0		0			0
1.41544	63.695	2.22222	543.014		0	8.99224	0	0		0	42.7131	0	0		0	10.1163	0	0		0	55.8268	0	0		0	10.1163	0	0		0	70.8139	0	0		0	29.9741	0	0		0	54.7028	0	0		0	10.1163	0	0
0			0		0			0		0			0		0			0		0			0		0			0		0			0		0			0		0			0		0			0
0	64.3016	0	0		0.366783	9.07788	4.0404	8.44843		0	43.1199	0	0		0	10.2126	0	0		0	56.3585	0	0		0	10.2126	0	0		0	71.4883	0	0		0	30.2596	0	0		0	55.2237	0	0		0	10.2126	0	0
0			0		0			0		0			0		0			0		0			0		0			0		0			0		0			0		0			0		0			0
0	64.9082	0	0		0	9.16352	0	0		0	43.5267	0	0		0	10.309	0	0		0	56.8902	0	0		0	10.309	0	0		0	72.1627	0	0		0	30.545	0	0		0	55.7447	0	0		0	10.309	0	0
0			0		0			0		0			0		0			0		0			0		0			0		0			0		0			0		0			0		0			0
0	65.5149	0	0		0	9.24916	0	0		0	43.9335	0	0		0	10.4053	0	0		0	57.4218	0	0		0	10.4053	0	0		0	72.8371	0	0		0	30.8305	0	0		0	56.2657	0	0		0	10.4053	0	0
0			0		0			0		0			0		0			0		0			0		0			0		0			0		0			0		0			0		0			0
0	66.1215	0	0		0	9.3348	0	0		0	44.3403	0	0		0	10.5016	0	0		0	57.9535	0	0		0	10.5016	0	0		0	73.5115	0	0		0	31.116	0	0		0	56.7867	0	0		0	10.5016	0	0
0			0		0			0		0			0		0			0		0			0		0			0		0			0		0			0		0			0		0			0
0	66.7281	0	0		0	9.42044	0	0		0	44.7471	0	0		0	10.598	0	0		0	58.4852	0	0		0	10.598	0	0		0	74.186	0	0		0	31.4015	0	0		0	57.3077	0	0		0	10.598	0	0
0			0		0			0		0			0		0			0		0			0		0			0		0			0		0			0		0			0		0			0
0	67.3347	0	0		0	9.50608	0	0		0	45.1539	0	0		0	10.6943	0	0		0	59.0169	0	0		0	10.6943	0	0		0	74.8604	0	0		0	31.6869	0	0		0	57.8286	0	0		0	10.6943	0	0
0			0		0			0		0			0		0			0		0			0		0			0		0			0		0			0		0			0		0			0
0	67.9413	0	0		0	9.59172	0	0		0	45.5607	0	0		0	10.7907	0	0		0	59.5486	0	0		0	10.7907	0	0		0	75.5348	0	0		0	31.9724	0	0		0	58.3496	0	0		0	10.7907	0	0
0			0		0			0		0			0		0			0		0			0		0			0		0			0		0			0		0			0		0			0
0	68.548	0	0		0	9.67736	0	0		0	45.9674	0	0		0	10.887	0	0		0	60.0803	0	0		0	10.887	0	0		0	76.2092	0	0		0	32.2579	0	0		0	58.8706	0	0		0	10.887	0	0
0			0		0			0		0			0		0			0		0			0		0			0		0			0		0			0		0			0		0			0
0	69.1546	0	0		0	9.763	0	0		0	46.3742	0	0		0	10.9834	0	0		0	60.612	0	0		0.422437	10.9834	3.84615	7.19387		0	76.8836	0	0		0	32.5433	0	0		0	59.3916	0	0		0.374433	10.9834	3.40909	6.86879
0			0		0			0		0			0		0			0		0			0		0			0		0			0		0			0		0			0		0			0
0	69.7612	0	0		0	9.84864	0	0		0	46.781	0	0		0	11.0797	0	0		0	61.1436	0	0		0	11.0797	0	0		0	77.558	0	0		0	32.8288	0	0		0	59.9126	0	0		0	11.0797	0	0
0			0		0			0		0			0		0			0		0			0		0			0		0			0		0			0		0			0		0			0
0	70.3678	0	0		0	9.93428	0	0		0	47.1878	0	0		0	11.1761	0	0		0	61.6753	0	0		0	11.1761	0	0		0	78.2325	0	0		0	33.1143	0	0		0	60.4335	0	0		0	11.1761	0	0
0			0		0			0		0			0		0			0		0			0		0			0		0			0		0			0		0			0		0			0
0	70.9744	0	0		0	10.0199	0	0		0	47.5946	0	0		0	11.2724	0	0		0	62.207	0	0		0	11.2724	0	0		0	78.9069	0	0		0	33.3997	0	0		0	60.9545	0	0		0	11.2724	0	0
0			0		0			0		0			0		0			0		0			0		0			0		0			0		0			0		0			0		0			0
0	71.5811	0	0		0	10.1056	0	0		0	48.0014	0	0		0	11.3688	0	0		0	62.7387	0	0		0	11.3688	0	0		0	79.5813	0	0		0	33.6852	0	0		0	61.4755	0	0		0	11.3688	0	0
0			0		0			0		0			0		0			0		0			0		0			0		0			0		0			0		0			0		0			0
0	72.1877	0	0		0	10.1912	0	0		0	48.4082	0	0		0	11.4651	0	0		0	63.2704	0	0		0	11.4651	0	0		0	80.2557	0	0		0	33.9707	0	0		0	61.9965	0	0		0	11.4651	0	0
0			0		0			0		0			0		0			0		0			0		0			0		0			0		0			0		0			0		0			0
0	72.7943	0	0		0	10.2768	0	0		0	48.815	0	0		0	11.5615	0	0		0	63.8021	0	0		0	11.5615	0	0		0	80.9301	0	0		0	34.2561	0	0		0	62.5174	0	0		0	11.5615	0	0
0			0		0			0		0			0		0			0		0			0		0			0		0			0		0			0		0			0		0			0
0	73.4009	0	0		0	10.3625	0	0		0	49.2218	0	0		0	11.6578	0	0		0	64.3337	0	0		0	11.6578	0	0		0	81.6045	0	0		0	34.5416	0	0		0	63.0384	0	0		0	11.6578	0	0
0			0		0			0		0			0		0			0		0			0		0			0		0			0		0			0		0			0		0			0
0	74.0075	0	0		0	10.4481	0	0		0	49.6286	0	0		0	11.7541	0	0		0	64.8654	0	0		0	11.7541	0	0		0	82.2789	0	0		0	34.8271	0	0		0	63.5594	0	0		0	11.7541	0	0
0			0		0			0		0			0		0			0		0			0		0			0		0			0		0			0		0			0		0			0
0	74.6141	0	0		0	10.5338	0	0		0	50.0354	0	0		0	11.8505	0	0		0	65.3971	0	0		0	11.8505	0	0		0	82.9534	0	0		0	35.1125	0	0		0	64.0804	0	0		0	11.8505	0	0
0			0		0			0		0			0		0			0		0			0		0			0		0			0		0			0		0			0		0			0
0	75.2208	0	0		0	10.6194	0	0		0	50.4422	0	0		0	11.9468	0	0		0	65.9288	0	0		0	11.9468	0	0		0	83.6278	0	0		0	35.398	0	0		0	64.6014	0	0		0	11.9468	0	0
0			0		0			0		0			0		0			0		0			0		0			0		0			0		0			0		0			0		0			0
0	75.8274	0	0		0	10.705	0	0		0	50.849	0	0		0	12.0432	0	0		0	66.4605	0	0		0	12.0432	0	0		0	84.3022	0	0		0	35.6835	0	0		0	65.1223	0	0		0	12.0432	0	0
0			0		0			0		0			0		0			0		0			0		0			0		0			0		0			0		0			0		0			0
0	76.434	0	0		0	10.7907	0	0		0	51.2557	0	0		0	12.1395	0	0		0	66.9922	0	0		0	12.1395	0	0		0	84.9766	0	0		0	35.9689	0	0		0	65.6433	0	0		0	12.1395	0	0
0			0		0			0		0			0		0			0		0			0		0			0		0			0		0			0		0			0		0			0
0	77.0406	0	0		0	10.8763	0	0		0	51.6625	0	0		0	12.2359	0	0		0	67.5238	0	0		0	12.2359	0	0		0	85.651	0	0		0	36.2544	0	0		0	66.1643	0	0		0	12.2359	0	0
0			0		0			0		0			0		0			0		0			0		0			0		0			0		0			0		0			0		0			0
0	77.6472	0	0		0.332181	10.962	3.0303	4.79272		0	52.0693	0	0		0	12.3322	0	0		0	68.0555	0	0		0	12.3322	0	0		0	86.3255	0	0		0	36.5399	0	0		0	66.6853	0	0		0	12.3322	0	0
0			0		0			0		0			0		0			0		0			0		0			0		0			0		0			0		0			0		0			0
0	78.2539	0	0		0	11.0476	0	0		0	52.4761	0	0		0	12.4285	0	0		0	68.5872	0	0		0	12.4285	0	0		0	86.9999	0	0		0	36.8254	0	0		0	67.2063	0	0		0	12.4285	0	0
0			0		0			0		0			0		0			0		0			0		0			0		0			0		0			0		0			0		0			0
0	78.8605	0	0		0	11.1332	0	0		0	52.8829	0	0		0	12.5249	0	0		0	69.1189	0	0		0	12.5249	0	0		0	87.6743	0	0		0	37.1108	0	0		0.769628	67.7272	1.13636	80.6722		0	12.5249	0	0
0			0		0			0		0			0		0			0		0			0		0			0		0			0		0			0		0			0		0			0
0	79.4671	0	0		0	11.2189	0	0		0	53.2897	0	0		0	12.6212	0	0		0	69.6506	0	0		0	12.6212	0	0		0	88.3487	0	0		0	37.3963	0	0		0	68.2482	0	0		0	12.6212	0	0
0			0		0			0		0			0		0			0		0			0		0			0		0			0		0			0		0			0		0			0
0	80.0737	0	0		0	11.3045	0	0		0	53.6965	0	0		0.353266	12.7176	2.77778	6.62378		0	70.1823	0	0		0.209631	12.7176	1.64835	2.35076		0	89.0231	0	0		0	37.6818	0	0		0	68.7692	0	0		0.578072	12.7176	4.54545	7.05723
0			0		0			0		0			0		0			0		0			0		0			0		0			0		0			0		0			0		0			0
0	80.6803	0	0		0	11.3902	0	0		0	54.1033	0	0		0	12.8139	0	0		0	70.7139	0	0		0	12.8139	0	0		0	89.6976	0	0		0	37.9672	0	0		0	69.2902	0	0		0	12.8139	0	0
0			0		0			0		0			0		0			0		0			0		0			0		0			0		0			0		0			0		0			0
0	81.287	0	0		0	11.4758	0	0		0	54.5101	0	0		0	12.9103	0	0		0	71.2456	0	0		0	12.9103	0	0		0	90.372	0	0		0.354191	38.2527	0.925926	28.5967		0	69.8111	0	0		0	12.9103	0	0
0			0		0			0		0			0		0			0		0			0		0			0		0			0		0			0		0			0		0			0
0	81.8936	0	0		0	11.5615	0	0		0	54.9169	0	0		0	13.0066	0	0		0	71.7773	0	0		0	13.0066	0	0		0	91.0464	0	0		0	38.5382	0	0		0	70.3321	0	0		0	13.0066	0	0
0			0		0			0		0			0		0			0		0			0		0			0		0			0		0			0		0			0		0			0
0	82.5002	0	0		0	11.6471	0	0		0	55.3237	0	0		0	13.103	0	0		0	72.309	0	0		0	13.103	0	0		0	91.7208	0	0		0	38.8236	0	0		0	70.8531	0	0		0	13.103	0	0
0			0		0			0		0			0		0			0		0			0		0			0		0			0		0			0		0			0		0			0
0	83.1068	0	0		0	11.7327	0	0		0	55.7304	0	0		0	13.1993	0	0		0	72.8407	0	0		0	13.1993	0	0		0	92.3952	0	0		0	39.1091	0	0		0	71.3741	0	0		0	13.1993	0	0
0			0		0			0		0			0		0			0		0			0		0			0		0			0		0			0		0			0		0			0
0	83.7134	0	0		0	11.8184	0	0		0	56.1372	0	0		0	13.2957	0	0		0	73.3724	0	0		0	13.2957	0	0		0	93.0696	0	0		0	39.3946	0	0		0	71.8951	0	0		0	13.2957	0	0
0			0		0			0		0			0		0			0		0			0		0			0		0			0		0			0		0			0		0			0
0	84.32	0	0		0	11.904	0	0		0	56.544	0	0		0	13.392	0	0		0	73.904	0	0		0	13.392	0	0		0	93.7441	0	0		0	39.68	0	0		0	72.416	0	0		0	13.392	0	0
0			0		0			0		0			0		0			0		0			0		0			0		0			0		0			0		0			0		0			0
0	84.9267	0	0		0	11.9896	0	0		0	56.9508	0	0		0	13.4884	0	0		0	74.4357	0	0		0	13.4884	0	0		0	94.4185	0	0		0	39.9655	0	0		0	72.937	0	0		0	13.4884	0	0
0			0		0			0		0			0		0			0		0			0		0			0		0			0		0			0		0			0		0			0
0	85.5333	0	0		0	12.0753	0	0		0	57.3576	0	0		0	13.5847	0	0		0	74.9674	0	0		0	13.5847	0	0		0	95.0929	0	0		0	40.251	0	0		0	73.458	0	0		0	13.5847	0	0
0			0		0			0		0			0		0			0		0			0		0			0		0			0		0			0		0			0		0			0
0	86.1399	0	0		0	12.1609	0	0		0	57.7644	0	0		0	13.681	0	0		0	75.4991	0	0		0	13.681	0	0		0	95.7673	0	0		0	40.5364	0	0		0	73.979	0	0		0	13.681	0	0
0			0		0			0		0			0		0			0		0			0		0			0		0			0		0			0		0			0		0			0
0	86.7465	0	0		0	12.2466	0	0		0	58.1712	0	0		0	13.7774	0	0		0	76.0308	0	0		0	13.7774	0	0		0	96.4417	0	0		0	40.8219	0	0		0	74.5	0	0		0	13.7774	0	0
0			0		0			0		0			0		0			0		0			0		0			0		0			0		0			0		0			0		0			0
0	87.3531	0	0		0	12.3322	0	0		0	58.578	0	0		0	13.8737	0	0		0	76.5625	0	0		0	13.8737	0	0		0	97.1161	0	0		0	41.1074	0	0		0	75.0209	0	0		0	13.8737	0	0
0			0		0			0		0			0		0			0		0			0		0			0		0			0		0			0		0			0		0			0
0	87.9598	0	0		0	12.4178	0	0		0	58.9848	0	0		0	13.9701	0	0		0	77.0941	0	0		0	13.9701	0	0		0	97.7906	0	0		0	41.3928	0	0		0	75.5419	0	0		0	13.9701	0	0
0			0		0			0		0			0		0			0		0			0		0			0		0			0		0			0		0			0		0			0
0	88.5664	0	0		0	12.5035	0	0		0	59.3916	0	0		0	14.0664	0	0		0	77.6258	0	0		0	14.0664	0	0		0	98.465	0	0		0	41.6783	0	0		0	76.0629	0	0		0	14.0664	0	0
0			0		0			0		0			0		0			0		0			0		0			0		0			0		0			0		0			0		0			0
0	89.173	0	0		0	12.5891	0	0		0	59.7984	0	0		0	14.1628	0	0		0	78.1575	0	0		0	14.1628	0	0		0	99.1394	0	0		0.388553	41.9638	0.925926	24.9049		0.870272	76.5839	1.13636	64.6038		0	14.1628	0	0
0			0		0			0		0			0		0			0		0			0		0			0		0			0		0			0		0			0		0			0
0	89.7796	0	0		0	12.6748	0	0		0	60.2052	0	0		0	14.2591	0	0		0	78.6892	0	0		0	14.2591	0	0		0	99.8138	0	0		0	42.2492	0	0		0	77.1048	0	0		0	14.2591	0	0
0			0		0			0		0			0		0			0		0			0		0			0		0			0		0			0		0			0		0			0
0	90.3862	0	0		0.257786	12.7604	2.0202	2.34665		0	60.612	0	0		0	14.3555	0	0		0	79.2209	0	0		0	14.3555	0	0		0	100.488	0	0		0	42.5347	0	0		0	77.6258	0	0		0	14.3555	0	0
0			0		0			0		0			0		0			0		0			0		0			0		0			0		0			0		0			0		0			0
0	90.9929	0	0		0	12.846	0	0		0	61.0187	0	0		0	14.4518	0	0		0	79.7526	0	0		0	14.4518	0	0		0	101.163	0	0		0	42.8202	0	0		0	78.1468	0	0		0	14.4518	0	0
0			0		0			0		0			0		0			0		0			0		0			0		0			0		0			0		0			0		0			0
0	91.5995	0	0		0	12.9317	0	0		0	61.4255	0	0		0	14.5481	0	0		0	80.2843	0	0		0.399674	14.5481	2.74725	2.80886		0	101.837	0	0		0	43.1056	0	0		0	78.6678	0	0		0.49596	14.5481	3.40909	3.85198
0			0		0			0		0			0		0			0		0			0		0			0		0			0		0			0		0			0		0			0
0	92.2061	0	0		0	13.0173	0	0		0	61.8323	0	0		0	14.6445	0	0		0	80.8159	0	0		0	14.6445	0	0		0	102.511	0	0		0	43.3911	0	0		0	79.1888	0	0		0	14.6445	0	0
0			0		0			0		0			0		0			0		0			0		0			0		0			0		0			0		0			0		0			0
0	92.8127	0	0		0	13.103	0	0		0	62.2391	0	0		0	14.7408	0	0		0	81.3476	0	0		0	14.7408	0	0		0	103.186	0	0		0.404413	43.6766	0.925926	23.2871		0	79.7097	0	0		0	14.7408	0	0
0			0		0			0		0			0		0			0		0			0		0			0		0			0		0			0		0			0		0			0
0	93.4193	0	0		0	13.1886	0	0		0	62.6459	0	0		0	14.8372	0	0		0	81.8793	0	0		0	14.8372	0	0		0	103.86	0	0		0	43.962	0	0		0	80.2307	0	0		0	14.8372	0	0
0			0		0			0		0			0		0			0		0			0		0			0		0			0		0			0		0			0		0			0
0	94.0259	0	0		0	13.2743	0	0		0	63.0527	0	0		0	14.9335	0	0		0	82.411	0	0		0	14.9335	0	0		0	104.535	0	0		0	44.2475	0	0		0	80.7517	0	0		0	14.9335	0	0
0			0		0			0		0			0		0			0		0			0		0			0		0			0		0			0		0			0		0			0
0	94.6326	0	0		0	13.3599	0	0		0	63.4595	0	0		0	15.0299	0	0		0	82.9427	0	0		0	15.0299	0	0		0	105.209	0	0		0	44.533	0	0		0	81.2727	0	0		0	15.0299	0	0
0			0		0			0		0			0		0			0		0			0		0			0		0			0		0			0		0			0		0			0
0	95.2392	0	0		0	13.4455	0	0		0	63.8663	0	0		0	15.1262	0	0		0	83.4744	0	0		0	15.1262	0	0		0	105.884	0	0		0	44.8184	0	0		0	81.7937	0	0		0	15.1262	0	0
0			0		0			0		0			0		0			0		0			0		0			0		0			0		0			0		0			0		0			0
0	95.8458	0	0		0	13.5312	0	0		0	64.2731	0	0		0	15.2226	0	0		0	84.006	0	0		0	15.2226	0	0		0	106.558	0	0		0	45.1039	0	0		0.935394	82.3146	1.13636	55.1566		0	15.2226	0	0
0			0		0			0		0			0		0			0		0			0		0			0		0			0		0			0		0			0		0			0
0	96.4524	0	0		0	13.6168	0	0		0	64.6799	0	0		0	15.3189	0	0		0	84.5377	0	0		0	15.3189	0	0		0	107.232	0	0		0	45.3894	0	0		0	82.8356	0	0		0	15.3189	0	0
0			0		0			0		0			0		0			0		0			0		0			0		0			0		0			0		0			0		0			0
0	97.059	0	0		0	13.7025	0	0		0	65.0867	0	0		0	15.4153	0	0		0	85.0694	0	0		0	15.4153	0	0		0	107.907	0	0		0	45.6748	0	0		0	83.3566	0	0		0	15.4153	0	0
0			0		0			0		0			0		0			0		0			0		0			0		0			0		0			0		0			0		0			0
0	97.6657	0	0		0	13.7881	0	0		0	65.4934	0	0		0	15.5116	0	0		0	85.6011	0	0		0	15.5116	0	0		0	108.581	0	0		0	45.9603	0	0		0	83.8776	0	0		0	15.5116	0	0
0			0		0			0		0			0		0			0		0			0		0			0		0			0		0			0		0			0		0			0
0	98.2723	0	0		0	13.8737	0	0		0	65.9002	0	0		0	15.608	0	0		0	86.1328	0	0		0	15.608	0	0		0	109.256	0	0		0	46.2458	0	0		0	84.3986	0	0		0	15.608	0	0
0			0		0			0		0			0		0			0		0			0		0			0		0			0		0			0		0			0		0			0
0	98.8789	0	0		0	13.9594	0	0		0	66.307	0	0		0	15.7043	0	0		0	86.6645	0	0		0	15.7043	0	0		0	109.93	0	0		0	46.5312	0	0		0	84.9195	0	0		0	15.7043	0	0
0			0		0			0		0			0		0			0		0			0		0			0		0			0		0			0		0			0		0			0
0	99.4855	0	0		0	14.045	0	0		0	66.7138	0	0		0	15.8006	0	0		0	87.1961	0	0		0	15.8006	0	0		0	110.605	0	0		0	46.8167	0	0		0	85.4405	0	0		0	15.8006	0	0
0			0		0			0		0			0		0			0		0			0		0			0		0			0		0			0		0			0		0			0
0	100.092	0	0		0	14.1307	0	0		0	67.1206	0	0		0	15.897	0	0		0	87.7278	0	0		0	15.897	0	0		0	111.279	0	0		0	47.1022	0	0		0	85.9615	0	0		0	15.897	0	0
0			0		0			0		0			0		0			0		0			0		0			0		0			0		0			0		0			0		0			0
0	100.699	0	0		0	14.2163	0	0		0	67.5274	0	0		0	15.9933	0	0		0	88.2595	0	0		0	15.9933	0	0		0	111.953	0	0		0	47.3877	0	0		0	86.4825	0	0		0	15.9933	0	0
0			0		0			0		0			0		0			0		0			0		0			0		0			0		0			0		0			0		0			0
0	101.305	0	0		0	14.3019	0	0		0	67.9342	0	0		0	16.0897	0	0		0	88.7912	0	0		0	16.0897	0	0		0	112.628	0	0		0	47.6731	0	0		0	87.0035	0	0		0	16.0897	0	0
0			0		0			0		0			0		0			0		0			0		0			0		0			0		0			0		0			0		0			0
0	101.912	0	0		0	14.3876	0	0		0	68.341	0	0		0	16.186	0	0		0	89.3229	0	0		0	16.186	0	0		0	113.302	0	0		0	47.9586	0	0		0	87.5244	0	0		0	16.186	0	0
0			0		0			0		0			0		0			0		0			0		0			0		0			0		0			0		0			0		0			0
0	102.519	0	0		0	14.4732	0	0		0	68.7478	0	0		0	16.2824	0	0		0	89.8546	0	0		0	16.2824	0	0		0	113.977	0	0		0	48.2441	0	0		0	88.0454	0	0		0	16.2824	0	0
0			0		0			0		0			0		0			0		0			0		0			0		0			0		0			0		0			0		0			0
0	103.125	0	0		0.588237	14.5589	4.0404	3.25766		0	69.1546	0	0		0.909928	16.3787	5.55556	7.71054		0	90.3862	0	0		0.899929	16.3787	5.49451	3.7678		0	114.651	0	0		0	48.5295	0	0		0	88.5664	0	0		1.11673	16.3787	6.81818	5.27902
0			0		0			0		0			0		0			0		0			0		0			0		0			0		0			0		0			0		0			0
0	103.732	0	0		0	14.6445	0	0		0	69.5614	0	0		0	16.4751	0	0		0	90.9179	0	0		0	16.4751	0	0		0	115.325	0	0		0	48.815	0	0		0	89.0874	0	0		0	16.4751	0	0
0			0		0			0		0			0		0			0		0			0		0			0		0			0		0			0		0			0		0			0
0	104.338	0	0		0	14.7301	0	0		0	69.9682	0	0		0	16.5714	0	0		0	91.4496	0	0		0	16.5714	0	0		0	116	0	0		0	49.1005	0	0		0	89.6083	0	0		0	16.5714	0	0
0			0		0			0		0			0		0			0		0			0		0			0		0			0		0			0		0			0		0			0
0	104.945	0	0		0	14.8158	0	0		0	70.3749	0	0		0	16.6678	0	0		0	91.9813	0	0		0	16.6678	0	0		0	116.674	0	0		0	49.3859	0	0		0	90.1293	0	0		0	16.6678	0	0
0			0		0			0		0			0		0			0		0			0		0			0		0			0		0			0		0			0		0			0
0	105.552	0	0		0	14.9014	0	0		0	70.7817	0	0		0	16.7641	0	0		0	92.513	0	0		0	16.7641	0	0		0	117.349	0	0		0	49.6714	0	0		0	90.6503	0	0		0	16.7641	0	0
0			0		0			0		0			0		0			0		0			0		0			0		0			0		0			0		0			0		0			0
0	106.158	0	0		0	14.9871	0	0		0	71.1885	0	0		0	16.8604	0	0		0	93.0447	0	0		0	16.8604	0	0		0	118.023	0	0		0	49.9569	0	0		0	91.1713	0	0		0	16.8604	0	0
0			0		0			0		0			0		0			0		0			0		0			0		0			0		0			0		0			0		0			0
0	106.765	0	0		0	15.0727	0	0		0	71.5953	0	0		0	16.9568	0	0		0	93.5763	0	0		0	16.9568	0	0		0	118.698	0	0		0	50.2423	0	0		0	91.6923	0	0		0	16.9568	0	0
0			0		0			0		0			0		0			0		0			0		0			0		0			0		0			0		0			0		0			0
0	107.372	0	0		0	15.1583	0	0		0	72.0021	0	0		0	17.0531	0	0		0	94.108	0	0		0	17.0531	0	0		0	119.372	0	0		0	50.5278	0	0		0	92.2132	0	0		0	17.0531	0	0
0			0		0			0		0			0		0			0		0			0		0			0		0			0		0			0		0			0		0			0
0	107.978	0	0		0	15.244	0	0		0	72.4089	0	0		0	17.1495	0	0		0	94.6397	0	0		0	17.1495	0	0		0	120.046	0	0		0	50.8133	0	0		0	92.7342	0	0		0	17.1495	0	0
0			0		0			0		0			0		0			0		0			0		0			0		0			0		0			0		0			0		0			0
0	108.585	0	0		0	15.3296	0	0		0	72.8157	0	0		0	17.2458	0	0		0	95.1714	0	0		0	17.2458	0	0		0	120.721	0	0		0.946273	51.0987	1.85185	33.8084		1.05972	93.2552	1.13636	39.1936		0	17.2458	0	0
0			0		0			0		0			0		0			0		0			0		0			0		0			0		0			0		0			0		0			0
0	109.191	0	0		0	15.4153	0	0		0	73.2225	0	0		0	17.3422	0	0		0	95.7031	0	0		0	17.3422	0	0		0	121.395	0	0		0	51.3842	0	0		0	93.7762	0	0		0	17.3422	0	0
0			0		0			0		0			0		0			0		0			0		0			0		0			0		0			0		0			0		0			0
0	109.798	0	0		0	15.5009	0	0		0	73.6293	0	0		0	17.4385	0	0		0	96.2348	0	0		0	17.4385	0	0		0	122.07	0	0		0	51.6697	0	0		0	94.2972	0	0		0	17.4385	0	0
0			0		0			0		0			0		0			0		0			0		0			0		0			0		0			0		0			0		0			0
0	110.405	0	0		0	15.5865	0	0		0	74.0361	0	0		0	17.5349	0	0		0	96.7665	0	0		0	17.5349	0	0		0	122.744	0	0		0	51.9551	0	0		0	94.8181	0	0		0	17.5349	0	0
0			0		0			0		0			0		0			0		0			0		0			0		0			0		0			0		0			0		0			0
0	111.011	0	0		0	15.6722	0	0		0	74.4429	0	0		0	17.6312	0	0		0	97.2981	0	0		0	17.6312	0	0		0	123.418	0	0		0	52.2406	0	0		0	95.3391	0	0		0	17.6312	0	0
0			0		0			0		0			0		0			0		0			0		0			0		0			0		0			0		0			0		0			0
0	111.618	0	0		0	15.7578	0	0		0	74.8496	0	0		0	17.7276	0	0		0	97.8298	0	0		0	17.7276	0	0		0	124.093	0	0		0	52.5261	0	0		0	95.8601	0	0		0	17.7276	0	0
0			0		0			0		0			0		0			0		0			0		0			0		0			0		0			0		0			0		0			0
0	112.225	0	0		0	15.8435	0	0		0	75.2565	0	0		0	17.8239	0	0		0	98.3615	0	0		0	17.8239	0	0		0	124.767	0	0		0.488996	52.8115	0.925926	15.5761		0	96.3811	0	0		0	17.8239	0	0
0			0		0			0		0			0		0			0		0			0		0			0		0			0		0			0		0			0		0			0
0	112.831	0	0		0	15.9291	0	0		0	75.6632	0	0		0	17.9202	0	0		0	98.8932	0	0		0	17.9202	0	0		0	125.442	0	0		0	53.097	0	0		1.10116	96.902	1.13636	34.4772		0	17.9202	0	0
0			0		0			0		0			0		0			0		0			0		0			0		0			0		0			0		0			0		0			0
0	113.438	0	0		0	16.0147	0	0		0	76.07	0	0		0	18.0166	0	0		0	99.4249	0	0		0	18.0166	0	0		0	126.116	0	0		0	53.3825	0	0		0	97.423	0	0		0	18.0166	0	0
0			0		0			0		0			0		0			0		0			0		0			0		0			0		0			0		0			0		0			0
0	114.044	0	0		0	16.1004	0	0		0	76.4768	0	0		0	18.1129	0	0		0	99.9565	0	0		0	18.1129	0	0		0	126.79	0	0		0	53.6679	0	0		0	97.944	0	0		0	18.1129	0	0
0			0		0			0		0			0		0			0		0			0		0			0		0			0		0			0		0			0		0			0
0	114.651	0	0		0	16.186	0	0		0	76.8836	0	0		1.51744	18.2093	8.33333	8.25077		0	100.488	0	0		1.50076	18.2093	8.24176	3.42917		0	127.465	0	0		0	53.9534	0	0		1.11892	98.465	1.13636	32.5484		0.413847	18.2093	2.27273	1.10367
0			0		0			0		0			0		0			0		0			0		0			0		0			0		0			0		0			0		0			0
0	115.258	0	0		0	16.2717	0	0		0	77.2904	0	0		0	18.3056	0	0		0	101.02	0	0		0	18.3056	0	0		0	128.139	0	0		0	54.2389	0	0		0	98.986	0	0		0	18.3056	0	0
0			0		0			0		0			0		0			0		0			0		0			0		0			0		0			0		0			0		0			0
0	115.864	0	0		0	16.3573	0	0		0	77.6972	0	0		0	18.402	0	0		0	101.552	0	0		0	18.402	0	0		0	128.814	0	0		0	54.5243	0	0		0	99.5069	0	0		0	18.402	0	0
0			0		0			0		0			0		0			0		0			0		0			0		0			0		0			0		0			0		0			0
2.58824	116.471	2.22222	238.248		1.32872	16.4429	8.08081	4.06799		0	78.104	0	0		0	18.4983	0	0		0	102.083	0	0		0	18.4983	0	0		0	129.488	0	0		0.507498	54.8098	0.925926	14.0953		0	100.028	0	0		0	18.4983	0	0
0			0		0			0		0			0		0			0		0			0		0			0		0			0		0			0		0			0		0			0
0	117.078	0	0		0	16.5286	0	0		0	78.5108	0	0		0	18.5947	0	0		0	102.615	0	0		0	18.5947	0	0		0	130.163	0	0		0	55.0953	0	0		2.2852	100.549	2.27273	60.1259		0	18.5947	0	0
0			0		0			0		0			0		0			0		0			0		0			0		0			0		0			0		0			0		0			0
0	117.684	0	0		0	16.6142	0	0		0	78.9176	0	0		0	18.691	0	0		0	103.147	0	0		0	18.691	0	0		0	130.837	0	0		0	55.3807	0	0		0	101.07	0	0		0	18.691	0	0
0			0		0			0		0			0		0			0		0			0		0			0		0			0		0			0		0			0		0			0
0	118.291	0	0		0	16.6999	0	0		0	79.3244	0	0		0	18.7873	0	0		0	103.678	0	0		0	18.7873	0	0		0	131.511	0	0		0	55.6662	0	0		0	101.591	0	0		0	18.7873	0	0
0			0		0			0		0			0		0			0		0			0		0			0		0			0		0			0		0			0		0			0
0	118.897	0	0		0	16.7855	0	0		0	79.7312	0	0		0	18.8837	0	0		0	104.21	0	0		0	18.8837	0	0		0	132.186	0	0		0	55.9517	0	0		0	102.112	0	0		0	18.8837	0	0
0			0		0			0		0			0		0			0		0			0		0			0		0			0		0			0		0			0		0			0
0	119.504	0	0		0	16.8712	0	0		0	80.138	0	0		0	18.98	0	0		0	104.742	0	0		0	18.98	0	0		0	132.86	0	0		0	56.2372	0	0		0	102.633	0	0		0	18.98	0	0
0			0		0			0		0			0		0			0		0			0		0			0		0			0		0			0		0			0		0			0
0	120.111	0	0		0	16.9568	0	0		0	80.5447	0	0		0	19.0764	0	0		0	105.273	0	0		0	19.0764	0	0		0	133.535	0	0		0.523358	56.5226	0.925926	12.8849		0	103.154	0	0		0	19.0764	0	0
0			0		0			0		0			0		0			0		0			0		0			0		0			0		0			0		0			0		0			0
0	120.717	0	0		0	17.0424	0	0		0	80.9515	0	0		0	19.1727	0	0		0	105.805	0	0		0	19.1727	0	0		0	134.209	0	0		0	56.8081	0	0		0	103.675	0	0		0	19.1727	0	0
0			0		0			0		0			0		0			0		0			0		0			0		0			0		0			0		0			0		0			0
0	121.324	0	0		0	17.1281	0	0		0	81.3583	0	0		0	19.2691	0	0		0	106.337	0	0		0	19.2691	0	0		0	134.883	0	0		0	57.0936	0	0		0	104.196	0	0		0	19.2691	0	0
0			0		0			0		0			0		0			0		0			0		0			0		0			0		0			0		0			0		0			0
0	121.93	0	0		0	17.2137	0	0		0	81.7651	0	0		0	19.3654	0	0		0	106.868	0	0		0	19.3654	0	0		0	135.558	0	0		0	57.379	0	0		0	104.717	0	0		0	19.3654	0	0
0			0		0			0		0			0		0			0		0			0		0			0		0			0		0			0		0			0		0			0
0	122.537	0	0		0	17.2994	0	0		2.28255	82.1719	2.77778	86.5547		0	19.4618	0	0		0	107.4	0	0		0	19.4618	0	0		0	136.232	0	0		0	57.6645	0	0		0	105.238	0	0		0	19.4618	0	0
0			0		0			0		0			0		0			0		0			0		0			0		0			0		0			0		0			0		0			0
0	123.144	0	0		0	17.385	0	0		0	82.5787	0	0		0	19.5581	0	0		0	107.932	0	0		0	19.5581	0	0		0	136.907	0	0		0	57.95	0	0		0	105.759	0	0		0	19.5581	0	0
0			0		0			0		0			0		0			0		0			0		0			0		0			0		0			0		0			0		0			0
0	123.75	0	0		0	17.4706	0	0		0	82.9855	0	0		0	19.6545	0	0		0	108.463	0	0		0	19.6545	0	0		0	137.581	0	0		0.539217	58.2354	0.925926	11.7289		0	106.28	0	0		0	19.6545	0	0
0			0		0			0		0			0		0			0		0			0		0			0		0			0		0			0		0			0		0			0
0	124.357	0	0		0	17.5563	0	0		0	83.3923	0	0		0	19.7508	0	0		0	108.995	0	0		0	19.7508	0	0		0	138.256	0	0		0	58.5209	0	0		0	106.801	0	0		0	19.7508	0	0
0			0		0			0		0			0		0			0		0			0		0			0		0			0		0			0		0			0		0			0
0	124.963	0	0		0	17.6419	0	0		0	83.7991	0	0		0	19.8471	0	0		0	109.527	0	0		0	19.8471	0	0		0	138.93	0	0		0	58.8064	0	0		0	107.322	0	0		0	19.8471	0	0
0			0		0			0		0			0		0			0		0			0		0			0		0			0		0			0		0			0		0			0
0	125.57	0	0		0	17.7276	0	0		0	84.2059	0	0		0	19.9435	0	0		0	110.058	0	0		0	19.9435	0	0		0	139.605	0	0		0	59.0918	0	0		0	107.843	0	0		0	19.9435	0	0
0			0		0			0		0			0		0			0		0			0		0			0		0			0		0			0		0			0		0			0
0	126.177	0	0		0	17.8132	0	0		0	84.6127	0	0		1.11332	20.0398	5.55556	3.66282		0	110.59	0	0		1.65164	20.0398	8.24176	1.75901		0	140.279	0	0		0	59.3773	0	0		0	108.364	0	0		0.455451	20.0398	2.27273	0.59999
0			0		0			0		0			0		0			0		0			0		0			0		0			0		0			0		0			0		0			0
0	126.783	0	0		0	17.8988	0	0		0	85.0195	0	0		0	20.1362	0	0		0	111.122	0	0		0	20.1362	0	0		0	140.953	0	0		0	59.6628	0	0		0	108.885	0	0		0	20.1362	0	0
0			0		0			0		0			0		0			0		0			0		0			0		0			0		0			0		0			0		0			0
0	127.39	0	0		0	17.9845	0	0		0	85.4262	0	0		0	20.2325	0	0		0	111.654	0	0		0	20.2325	0	0		0	141.628	0	0		0	59.9482	0	0		0	109.406	0	0		0	20.2325	0	0
0			0		0			0		0			0		0			0		0			0		0			0		0			0		0			0		0			0		0			0
0	127.997	0	0		0	18.0701	0	0		0	85.833	0	0		0	20.3289	0	0		0	112.185	0	0		0	20.3289	0	0		0	142.302	0	0		0	60.2337	0	0		0	109.927	0	0		0	20.3289	0	0
0			0		0			0		0			0		0			0		0			0		0			0		0			0		0			0		0			0		0			0
0	128.603	0	0		0	18.1558	0	0		0	86.2398	0	0		0	20.4252	0	0		0	112.717	0	0		0	20.4252	0	0		0	142.976	0	0		0	60.5192	0	0		0	110.448	0	0		0	20.4252	0	0
0			0		0			0		0			0		0			0		0			0		0			0		0			0		0			0		0			0		0			0
0	129.21	0	0		1.47405	18.2414	8.08081	2.2671		0	86.6466	0	0		0	20.5216	0	0		0	113.249	0	0		0	20.5216	0	0		0	143.651	0	0		0	60.8046	0	0		0	110.969	0	0		0	20.5216	0	0
0			0		0			0		0			0		0			0		0			0		0			0		0			0		0			0		0			0		0			0
0	129.816	0	0		0	18.327	0	0		0	87.0534	0	0		0	20.6179	0	0		0	113.78	0	0		0	20.6179	0	0		0	144.325	0	0		0	61.0901	0	0		1.26693	111.489	1.13636	18.634		0	20.6179	0	0
0			0		0			0		0			0		0			0		0			0		0			0		0			0		0			0		0			0		0			0
0	130.423	0	0		0	18.4127	0	0		0	87.4602	0	0		0	20.7143	0	0		0	114.312	0	0		0	20.7143	0	0		0	145	0	0		0	61.3756	0	0		0	112.01	0	0		0	20.7143	0	0
0			0		0			0		0			0		0			0		0			0		0			0		0			0		0			0		0			0		0			0
0	131.03	0	0		0	18.4983	0	0		0	87.867	0	0		0	20.8106	0	0		0	114.844	0	0		0	20.8106	0	0		0	145.674	0	0		0	61.6611	0	0		0	112.531	0	0		0	20.8106	0	0
0			0		0			0		0			0		0			0		0			0		0			0		0			0		0			0		0			0		0			0
0	131.636	0	0		0	18.584	0	0		0	88.2738	0	0		0	20.9069	0	0		0	115.375	0	0		0	20.9069	0	0		0	146.349	0	0		1.72074	61.9465	2.77778	28.2313		0	113.052	0	0		0	20.9069	0	0
0			0		0			0		0			0		0			0		0			0		0			0		0			0		0			0		0			0		0			0
0	132.243	0	0		0	18.6696	0	0		0	88.6806	0	0		0	21.0033	0	0		0	115.907	0	0		0	21.0033	0	0		0	147.023	0	0		0	62.232	0	0		0	113.573	0	0		0	21.0033	0	0
0			0		0			0		0			0		0			0		0			0		0			0		0			0		0			0		0			0		0			0
0	132.85	0	0		0	18.7552	0	0		0	89.0874	0	0		0	21.0996	0	0		0	116.439	0	0		0	21.0996	0	0		0	147.697	0	0		0	62.5174	0	0		0	114.094	0	0		0	21.0996	0	0
0			0		0			0		0			0		0			0		0			0		0			0		0			0		0			0		0			0		0			0
0	133.456	0	0		0	18.8409	0	0		2.48595	89.4942	2.77778	65.3365		0	21.196	0	0		0	116.97	0	0		0	21.196	0	0		0	148.372	0	0		0	62.8029	0	0		0	114.615	0	0		0	21.196	0	0
0			0		0			0		0			0		0			0		0			0		0			0		0			0		0			0		0			0		0			0
0	134.063	0	0		0	18.9265	0	0		0	89.9009	0	0		0	21.2923	0	0		0	117.502	0	0		0	21.2923	0	0		0	149.046	0	0		0	63.0884	0	0		1.30837	115.136	1.13636	15.4288		0	21.2923	0	0
0			0		0			0		0			0		0			0		0			0		0			0		0			0		0			0		0			0		0			0
0	134.669	0	0		0	19.0121	0	0		0	90.3077	0	0		0	21.3887	0	0		0	118.034	0	0		0	21.3887	0	0		0	149.721	0	0		0	63.3738	0	0		0	115.657	0	0		0	21.3887	0	0
0			0		0			0		0			0		0			0		0			0		0			0		0			0		0			0		0			0		0			0
0	135.276	0	0		0	19.0978	0	0		0	90.7145	0	0		0	21.485	0	0		0	118.566	0	0		0	21.485	0	0		0	150.395	0	0		0	63.6593	0	0		0	116.178	0	0		0	21.485	0	0
0			0		0			0		0			0		0			0		0			0		0			0		0			0		0			0		0			0		0			0
0	135.883	0	0		0	19.1834	0	0		0	91.1213	0	0		0	21.5814	0	0		0	119.097	0	0		0	21.5814	0	0		0	151.07	0	0		2.36833	63.9448	3.7037	33.0708		1.32613	116.699	1.13636	14.1477		0	21.5814	0	0
0			0		0			0		0			0		0			0		0			0		0			0		0			0		0			0		0			0		0			0
0	136.489	0	0		0	19.2691	0	0		0	91.5281	0	0		0	21.6777	0	0		0	119.629	0	0		0	21.6777	0	0		0	151.744	0	0		0	64.2302	0	0		0	117.22	0	0		0	21.6777	0	0
0			0		0			0		0			0		0			0		0			0		0			0		0			0		0			0		0			0		0			0
0	137.096	0	0		0	19.3547	0	0		0	91.9349	0	0		0	21.7741	0	0		0	120.16	0	0		0	21.7741	0	0		0	152.418	0	0		0	64.5157	0	0		0	117.741	0	0		0	21.7741	0	0
0			0		0			0		0			0		0			0		0			0		0			0		0			0		0			0		0			0		0			0
0	137.702	0	0		0	19.4404	0	0		0	92.3417	0	0		0.607511	21.8704	2.77778	1.09873		0	120.692	0	0		1.442	21.8704	6.59341	0.512963		0	153.093	0	0		0	64.8012	0	0		0	118.262	0	0		1.49116	21.8704	6.81818	0.745876
0			0		0			0		0			0		0			0		0			0		0			0		0			0		0			0		0			0		0			0
0	138.309	0	0		0	19.526	0	0		0	92.7485	0	0		0	21.9668	0	0		0	121.224	0	0		0	21.9668	0	0		0	153.767	0	0		0	65.0867	0	0		1.34981	118.783	1.13636	12.5259		0	21.9668	0	0
0			0		0			0		0			0		0			0		0			0		0			0		0			0		0			0		0			0		0			0
0	138.916	0	0		0	19.6116	0	0		2.58765	93.1553	2.77778	55.8445		0	22.0631	0	0		0	121.756	0	0		0	22.0631	0	0		0	154.442	0	0		0	65.3721	0	0		0	119.304	0	0		0	22.0631	0	0
0			0		0			0		0			0		0			0		0			0		0			0		0			0		0			0		0			0		0			0
0	139.522	0	0		0	19.6973	0	0		0	93.5621	0	0		0	22.1594	0	0		0	122.287	0	0		0	22.1594	0	0		0	155.116	0	0		1.21588	65.6576	1.85185	14.6941		0	119.825	0	0		0	22.1594	0	0
0			0		0			0		0			0		0			0		0			0		0			0		0			0		0			0		0			0		0			0
0	140.129	0	0		0	19.7829	0	0		0	93.9689	0	0		0	22.2558	0	0		0	122.819	0	0		0	22.2558	0	0		0	155.791	0	0		0	65.9431	0	0		0	120.346	0	0		0	22.2558	0	0
0			0		0			0		0			0		0			0		0			0		0			0		0			0		0			0		0			0		0			0
0	140.736	0	0		0	19.8686	0	0		0	94.3757	0	0		0	22.3521	0	0		0	123.351	0	0		0	22.3521	0	0		0	156.465	0	0		0	66.2285	0	0		0	120.867	0	0		0	22.3521	0	0
0			0		0			0		0			0		0			0		0			0		0			0		0			0		0			0		0			0		0			0
0	141.342	0	0		0	19.9542	0	0		0	94.7824	0	0		0	22.4485	0	0		0	123.882	0	0		0	22.4485	0	0		0	157.139	0	0		0	66.514	0	0		0	121.388	0	0		0	22.4485	0	0
0			0		0			0		0			0		0			0		0			0		0			0		0			0		0			0		0			0		0			0
3.15442	141.949	2.22222	135.426		1.21454	20.0398	6.06061	0.741694		0	95.1892	0	0		0	22.5448	0	0		0	124.414	0	0		0	22.5448	0	0		0	157.814	0	0		0	66.7995	0	0		0	121.909	0	0		0	22.5448	0	0
0			0		0			0		0			0		0			0		0			0		0			0		0			0		0			0		0			0		0			0
0	142.555	0	0		0	20.1255	0	0		0	95.596	0	0		0	22.6412	0	0		0	124.946	0	0		0	22.6412	0	0		0	158.488	0	0		0	67.0849	0	0		0	122.43	0	0		0	22.6412	0	0
0			0		0			0		0			0		0			0		0			0		0			0		0			0		0			0		0			0		0			0
0	143.162	0	0		0	20.2111	0	0		0	96.0028	0	0		0	22.7375	0	0		0	125.477	0	0		0	22.7375	0	0		0	159.163	0	0		0.6238	67.3704	0.925926	6.48074		0	122.951	0	0		0	22.7375	0	0
0			0		0			0		0			0		0			0		0			0		0			0		0			0		0			0		0			0		0			0
0	143.769	0	0		0	20.2968	0	0		0	96.4096	0	0		0	22.8339	0	0		0	126.009	0	0		0	22.8339	0	0		0	159.837	0	0		0	67.6559	0	0		0	123.472	0	0		0	22.8339	0	0
0			0		0			0		0			0		0			0		0			0		0			0		0			0		0			0		0			0		0			0
0	144.375	0	0		0	20.3824	0	0		0	96.8164	0	0		0	22.9302	0	0		0	126.541	0	0		0	22.9302	0	0		0	160.511	0	0		0	67.9413	0	0		5.63604	123.993	4.54545	35.613		0	22.9302	0	0
0			0		0			0		0			0		0			0		0			0		0			0		0			0		0			0		0			0		0			0
0	144.982	0	0		0	20.468	0	0		0	97.2232	0	0		0	23.0266	0	0		0	127.072	0	0		0	23.0266	0	0		0	161.186	0	0		0	68.2268	0	0		0	124.514	0	0		0	23.0266	0	0
0			0		0			0		0			0		0			0		0			0		0			0		0			0		0			0		0			0		0			0
0	145.589	0	0		0	20.5537	0	0		0	97.63	0	0		0	23.1229	0	0		0	127.604	0	0		0	23.1229	0	0		0	161.86	0	0		0	68.5123	0	0		0	125.035	0	0		0	23.1229	0	0
0			0		0			0		0			0		0			0		0			0		0			0		0			0		0			0		0			0		0			0
0	146.195	0	0		0	20.6393	0	0		0	98.0368	0	0		0	23.2192	0	0		0	128.136	0	0		0	23.2192	0	0		0	162.535	0	0		0	68.7977	0	0		0	125.556	0	0		0	23.2192	0	0
0			0		0			0		0			0		0			0		0			0		0			0		0			0		0			0		0			0		0			0
0	146.802	0	0		0	20.725	0	0		0	98.4436	0	0		0	23.3156	0	0		0	128.667	0	0		0	23.3156	0	0		0	163.209	0	0		0	69.0832	0	0		2.86538	126.077	2.27273	15.2537		0	23.3156	0	0
0			0		0			0		0			0		0			0		0			0		0			0		0			0		0			0		0			0		0			0
0	147.408	0	0		0	20.8106	0	0		0	98.8504	0	0		0	23.4119	0	0		0	129.199	0	0		0	23.4119	0	0		0	163.883	0	0		2.56921	69.3687	3.7037	22.1548		0	126.598	0	0		0	23.4119	0	0
0			0		0			0		0			0		0			0		0			0		0			0		0			0		0			0		0			0		0			0
0	148.015	0	0		0	20.8962	0	0		0	99.2571	0	0		0	23.5083	0	0		0	129.731	0	0		0	23.5083	0	0		0	164.558	0	0		0	69.6541	0	0		0	127.119	0	0		0	23.5083	0	0
0			0		0			0		0			0		0			0		0			0		0			0		0			0		0			0		0			0		0			0
0	148.622	0	0		0	20.9819	0	0		0	99.6639	0	0		0	23.6046	0	0		0	130.262	0	0		0	23.6046	0	0		0	165.232	0	0		0	69.9396	0	0		0	127.64	0	0		0	23.6046	0	0
0			0		0			0		0			0		0			0		0			0		0			0		0			0		0			0		0			0		0			0
0	149.228	0	0		0	21.0675	0	0		0	100.071	0	0		0	23.701	0	0		0	130.794	0	0		1.43248	23.701	6.04396	0.0555496		0	165.907	0	0		0	70.2251	0	0		0	128.161	0	0		1.07732	23.701	4.54545	0.0991514
0			0		0			0		0			0		0			0		0			0		0			0		0			0		0			0		0			0		0			0
0	149.835	0	0		0	21.1532	0	0		2.79104	100.478	2.77778	39.0943		0	23.7973	0	0		0	131.326	0	0		0	23.7973	0	0		0	166.581	0	0		0	70.5105	0	0		0	128.682	0	0		0	23.7973	0	0
0			0		0			0		0			0		0			0		0			0		0			0		0			0		0			0		0			0		0			0
0	150.441	0	0		0	21.2388	0	0		0	100.884	0	0		0	23.8937	0	0		0	131.858	0	0		0	23.8937	0	0		0	167.256	0	0		0	70.796	0	0		0	129.203	0	0		0	23.8937	0	0
0			0		0			0		0			0		0			0		0			0		0			0		0			0		0			0		0			0		0			0
0	151.048	0	0		0	21.3244	0	0		0	101.291	0	0		0	23.99	0	0		0	132.389	0	0		0	23.99	0	0		0	167.93	0	0		2.63265	71.0815	3.7037	19.1604		2.94827	129.724	2.27273	11.2615		0	23.99	0	0
0			0		0			0		0			0		0			0		0			0		0			0		0			0		0			0		0			0		0			0
0	151.655	0	0		0	21.4101	0	0		0	101.698	0	0		0	24.0863	0	0		0	132.921	0	0		0	24.0863	0	0		0	168.604	0	0		0	71.367	0	0		0	130.245	0	0		0	24.0863	0	0
0			0		0			0		0			0		0			0		0			0		0			0		0			0		0			0		0			0		0			0
0	152.261	0	0		0	21.4957	0	0		2.83624	102.105	2.77778	35.7765		0	24.1827	0	0		0	133.453	0	0		0	24.1827	0	0		0	169.279	0	0		0	71.6524	0	0		0	130.766	0	0		0	24.1827	0	0
0			0		0			0		0			0		0			0		0			0		0			0		0			0		0			0		0			0		0			0
0	152.868	0	0		0	21.5814	0	0		0	102.511	0	0		0	24.279	0	0		0	133.984	0	0		0	24.279	0	0		0	169.953	0	0		0	71.9379	0	0		1.49189	131.287	1.13636	4.86785		0	24.279	0	0
0			0		0			0		0			0		0			0		0			0		0			0		0			0		0			0		0			0		0			0
0	153.475	0	0		0	21.667	0	0		0	102.918	0	0		0	24.3754	0	0		0	134.516	0	0		0	24.3754	0	0		0	170.628	0	0		0	72.2233	0	0		0	131.808	0	0		0	24.3754	0	0
0			0		0			0		0			0		0			0		0			0		0			0		0			0		0			0		0			0		0			0
0	154.081	0	0		0	21.7526	0	0		0	103.325	0	0		0	24.4717	0	0		0	135.048	0	0		0	24.4717	0	0		0	171.302	0	0		0	72.5088	0	0		0	132.329	0	0		0	24.4717	0	0
0			0		0			0		0			0		0			0		0			0		0			0		0			0		0			0		0			0		0			0
0	154.688	0	0		0.882355	21.8383	4.0404	0.116744		2.88144	103.732	2.77778	32.6058		0	24.5681	0	0		0	135.579	0	0		0	24.5681	0	0		0	171.976	0	0		0	72.7943	0	0		0	132.85	0	0		0	24.5681	0	0
0			0		0			0		0			0		0			0		0			0		0			0		0			0		0			0		0			0		0			0
0	155.294	0	0		0	21.9239	0	0		0	104.139	0	0		0	24.6644	0	0		0	136.111	0	0		0	24.6644	0	0		0	172.651	0	0		0.676664	73.0798	0.925926	3.9854		6.0623	133.37	4.54545	15.7478		0	24.6644	0	0
0			0		0			0		0			0		0			0		0			0		0			0		0			0		0			0		0			0		0			0
0	155.901	0	0		0	22.0096	0	0		0	104.545	0	0		0	24.7608	0	0		0	136.643	0	0		0	24.7608	0	0		0	173.325	0	0		0	73.3652	0	0		0	133.892	0	0		0	24.7608	0	0
0			0		0			0		0			0		0			0		0			0		0			0		0			0		0			0		0			0		0			0
0	156.508	0	0		0	22.0952	0	0		0	104.952	0	0		0	24.8571	0	0		0	137.174	0	0		0	24.8571	0	0		0	174	0	0		0	73.6507	0	0		0	134.412	0	0		0	24.8571	0	0
0			0		0			0		0			0		0			0		0			0		0			0		0			0		0			0		0			0		0			0
0	157.114	0	0		0	22.1808	0	0		0	105.359	0	0		0	24.9535	0	0		0	137.706	0	0		0	24.9535	0	0		0	174.674	0	0		0	73.9362	0	0		0	134.934	0	0		0	24.9535	0	0
0			0		0			0		0			0		0			0		0			0		0			0		0			0		0			0		0			0		0			0
0	157.721	0	0		0	22.2665	0	0		0	105.766	0	0		0	25.0498	0	0		0	138.238	0	0		0	25.0498	0	0		0	175.349	0	0		0	74.2216	0	0		0	135.454	0	0		0	25.0498	0	0
0			0		0			0		0			0		0			0		0			0		0			0		0			0		0			0		0			0		0			0
0	158.328	0	0		0	22.3521	0	0		0	106.173	0	0		0	25.1461	0	0		0	138.769	0	0		0	25.1461	0	0		0	176.023	0	0		0	74.5071	0	0		0	135.975	0	0		0	25.1461	0	0
0			0		0			0		0			0		0			0		0			0		0			0		0			0		0			0		0			0		0			0
0	158.934	0	0		0	22.4378	0	0		0	106.579	0	0		0	25.2425	0	0		0	139.301	0	0		0	25.2425	0	0		0	176.697	0	0		2.07757	74.7926	2.77778	10.0635		0	136.496	0	0		0	25.2425	0	0
0			0		0			0		0			0		0			0		0			0		0			0		0			0		0			0		0			0		0			0
0	159.541	0	0		0	22.5234	0	0		0	106.986	0	0		0	25.3388	0	0		0	139.833	0	0		0	25.3388	0	0		0	177.372	0	0		0	75.078	0	0		1.55702	137.017	1.13636	2.54535		0	25.3388	0	0
0			0		0			0		0			0		0			0		0			0		0			0		0			0		0			0		0			0		0			0
0	160.147	0	0		0	22.609	0	0		0	107.393	0	0		0	25.4352	0	0		0	140.364	0	0		0	25.4352	0	0		0	178.046	0	0		0	75.3635	0	0		0	137.538	0	0		0	25.4352	0	0
0			0		0			0		0			0		0			0		0			0		0			0		0			0		0			0		0			0		0			0
3.57231	160.754	2.22222	78.0388		0	22.6947	0	0		0	107.8	0	0		1.41842	25.5315	5.55556	0.383713		0	140.896	0	0		1.40283	25.5315	5.49451	0.0417675		0	178.721	0	0		0	75.649	0	0		0	138.059	0	0		1.45066	25.5315	5.68182	0.00710565
0			0		0			0		0			0		0			0		0			0		0			0		0			0		0			0		0			0		0			0
0	161.361	0	0		0	22.7803	0	0		0	108.207	0	0		0	25.6279	0	0		0	141.428	0	0		0	25.6279	0	0		0	179.395	0	0		0	75.9344	0	0		6.29911	138.58	4.54545	8.16597		0	25.6279	0	0
0			0		0			0		0			0		0			0		0			0		0			0		0			0		0			0		0			0		0			0
0	161.967	0	0		0	22.866	0	0		0	108.613	0	0		0	25.7242	0	0		0	141.96	0	0		0	25.7242	0	0		0	180.07	0	0		0	76.2199	0	0		0	139.101	0	0		0	25.7242	0	0
0			0		0			0		0			0		0			0		0			0		0			0		0			0		0			0		0			0		0			0
0	162.574	0	0		0	22.9516	0	0		0	109.02	0	0		0	25.8206	0	0		0	142.491	0	0		0	25.8206	0	0		0	180.744	0	0		0.708383	76.5054	0.925926	2.77795		0	139.622	0	0		0	25.8206	0	0
0			0		0			0		0			0		0			0		0			0		0			0		0			0		0			0		0			0		0			0
0	163.18	0	0		0	23.0373	0	0		0	109.427	0	0		0	25.9169	0	0		0	143.023	0	0		0	25.9169	0	0		0	181.418	0	0		0	76.7908	0	0		0	140.143	0	0		0	25.9169	0	0
0			0		0			0		0			0		0			0		0			0		0			0		0			0		0			0		0			0		0			0
0	163.787	0	0		0	23.1229	0	0		0	109.834	0	0		0	26.0132	0	0		0	143.555	0	0		0	26.0132	0	0		2.06924	182.093	1.13636	75.2055		0	77.0763	0	0		3.19692	140.664	2.27273	2.91202		0	26.0132	0	0
0			0		0			0		0			0		0			0		0			0		0			0		0			0		0			0		0			0		0			0
3.6532	164.394	2.22222	68.7468		0	23.2085	0	0		0	110.24	0	0		0	26.1096	0	0		0	144.086	0	0		0	26.1096	0	0		0	182.767	0	0		0	77.3618	0	0		0	141.185	0	0		0	26.1096	0	0
0			0		0			0		0			0		0			0		0			0		0			0		0			0		0			0		0			0		0			0
0	165	0	0		0	23.2942	0	0		0	110.647	0	0		0	26.2059	0	0		0	144.618	0	0		0	26.2059	0	0		0	183.442	0	0		0	77.6472	0	0		0	141.706	0	0		0	26.2059	0	0
0			0		0			0		0			0		0			0		0			0		0			0		0			0		0			0		0			0		0			0
0	165.607	0	0		0	23.3798	0	0		0	111.054	0	0		0	26.3023	0	0		0	145.15	0	0		0	26.3023	0	0		0	184.116	0	0		0	77.9327	0	0		1.61622	142.227	1.13636	1.0817		0	26.3023	0	0
0			0		0			0		0			0		0			0		0			0		0			0		0			0		0			0		0			0		0			0
3.69364	166.214	2.22222	64.3218		0	23.4655	0	0		0	111.461	0	0		0	26.3986	0	0		0	145.681	0	0		0	26.3986	0	0		0	184.79	0	0		0	78.2182	0	0		0	142.748	0	0		0	26.3986	0	0
0			0		0			0		0			0		0			0		0			0		0			0		0			0		0			0		0			0		0			0
0	166.82	0	0		0	23.5511	0	0		0	111.868	0	0		0	26.495	0	0		0	146.213	0	0		0	26.495	0	0		0	185.465	0	0		0.726886	78.5036	0.925926	2.17395		0	143.269	0	0		0	26.495	0	0
0			0		0			0		0			0		0			0		0			0		0			0		0			0		0			0		0			0		0			0
0	167.427	0	0		0	23.6367	0	0		0	112.275	0	0		0	26.5913	0	0		0	146.745	0	0		0	26.5913	0	0		0	186.139	0	0		0	78.7891	0	0		0	143.79	0	0		0	26.5913	0	0
0			0		0			0		0			0		0			0		0			0		0			0		0			0		0			0		0			0		0			0
0	168.034	0	0		1.43772	23.7224	6.06061	0.00205774		0	112.681	0	0		0	26.6877	0	0		0	147.276	0	0		0	26.6877	0	0		0	186.814	0	0		0	79.0746	0	0		1.6399	144.311	1.13636	0.668966		0	26.6877	0	0
0			0		0			0		0			0		0			0		0			0		0			0		0			0		0			0		0			0		0			0
0	168.64	0	0		0	23.808	0	0		3.14134	113.088	2.77778	17.229		0	26.784	0	0		0	147.808	0	0		0	26.784	0	0		0	187.488	0	0		0	79.3601	0	0		0	144.832	0	0		0	26.784	0	0
0			0		0			0		0			0		0			0		0			0		0			0		0			0		0			0		0			0		0			0
0	169.247	0	0		0	23.8937	0	0		0	113.495	0	0		0	26.8804	0	0		0	148.34	0	0		0	26.8804	0	0		0	188.162	0	0		0	79.6455	0	0		0	145.353	0	0		0	26.8804	0	0
0			0		0			0		0			0		0			0		0			0		0			0		0			0		0			0		0			0		0			0
0	169.853	0	0		0	23.9793	0	0		0	113.902	0	0		0	26.9767	0	0		0	148.871	0	0		0	26.9767	0	0		0	188.837	0	0		0	79.931	0	0		0	145.874	0	0		0	26.9767	0	0
0			0		0			0		0			0		0			0		0			0		0			0		0			0		0			0		0			0		0			0
0	170.46	0	0		0	24.0649	0	0		0	114.308	0	0		0	27.073	0	0		0	149.403	0	0		0	27.073	0	0		0	189.511	0	0		0	80.2164	0	0		0	146.395	0	0		0	27.073	0	0
0			0		0			0		0			0		0			0		0			0		0			0		0			0		0			0		0			0		0			0
0	171.067	0	0		0	24.1506	0	0		0	114.715	0	0		0	27.1694	0	0		0	149.935	0	0		0	27.1694	0	0		0	190.186	0	0		0	80.5019	0	0		0	146.916	0	0		0	27.1694	0	0
0			0		0			0		0			0		0			0		0			0		0			0		0			0		0			0		0			0		0			0
0	171.673	0	0		0	24.2362	0	0		0	115.122	0	0		0	27.2657	0	0		0	150.466	0	0		0	27.2657	0	0		0	190.86	0	0		0	80.7874	0	0		0	147.437	0	0		0	27.2657	0	0
0			0		0			0		0			0		0			0		0			0		0			0		0			0		0			0		0			0		0			0
0	172.28	0	0		0	24.3219	0	0		0	115.529	0	0		0.760058	27.3621	2.77778	0.017668		0	150.998	0	0		2.25512	27.3621	8.24176	0.601909		0	191.535	0	0		0	81.0729	0	0		1.68134	147.958	1.13636	0.184163		2.17653	27.3621	7.95455	0.379489
0			0		0			0		0			0		0			0		0			0		0			0		0			0		0			0		0			0		0			0
0	172.886	0	0		0	24.4075	0	0		0	115.936	0	0		0	27.4584	0	0		0	151.53	0	0		0	27.4584	0	0		0	192.209	0	0		0	81.3583	0	0		0	148.479	0	0		0	27.4584	0	0
0			0		0			0		0			0		0			0		0			0		0			0		0			0		0			0		0			0		0			0
0	173.493	0	0		0	24.4931	0	0		0	116.342	0	0		0	27.5548	0	0		0	152.061	0	0		0	27.5548	0	0		0	192.883	0	0		0	81.6438	0	0		0	149	0	0		0	27.5548	0	0
0			0		0			0		0			0		0			0		0			0		0			0		0			0		0			0		0			0		0			0
0	174.1	0	0		0	24.5788	0	0		0	116.749	0	0		0	27.6511	0	0		0	152.593	0	0		0	27.6511	0	0		0	193.558	0	0		1.51721	81.9293	1.85185	2.62115		1.6991	149.521	1.13636	0.0689254		0	27.6511	0	0
0			0		0			0		0			0		0			0		0			0		0			0		0			0		0			0		0			0		0			0
0	174.706	0	0		0	24.6644	0	0		0	117.156	0	0		0	27.7475	0	0		0	153.125	0	0		0	27.7475	0	0		0	194.232	0	0		0	82.2147	0	0		0	150.042	0	0		0	27.7475	0	0
0			0		0			0		0			0		0			0		0			0		0			0		0			0		0			0		0			0		0			0
0	175.313	0	0		0	24.7501	0	0		0	117.563	0	0		0	27.8438	0	0		0	153.657	0	0		0	27.8438	0	0		2.21485	194.907	1.13636	53.3798		0	82.5002	0	0		0	150.563	0	0		0	27.8438	0	0
0			0		0			0		0			0		0			0		0			0		0			0		0			0		0			0		0			0		0			0
0	175.919	0	0		0	24.8357	0	0		0	117.97	0	0		0	27.9402	0	0		0	154.188	0	0		0	27.9402	0	0		0	195.581	0	0		0	82.7857	0	0		0	151.084	0	0		0	27.9402	0	0
0			0		0			0		0			0		0			0		0			0		0			0		0			0		0			0		0			0		0			0
0	176.526	0	0		0	24.9213	0	0		3.28823	118.376	2.77778	10.6889		0	28.0365	0	0		0	154.72	0	0		0	28.0365	0	0		0	196.256	0	0		0	83.0711	0	0		3.44556	151.605	2.27273	0.00326302		0	28.0365	0	0
0			0		0			0		0			0		0			0		0			0		0			0		0			0		0			0		0			0		0			0
0	177.133	0	0		0	25.007	0	0		0	118.783	0	0		0	28.1329	0	0		0	155.252	0	0		0	28.1329	0	0		0	196.93	0	0		0	83.3566	0	0		0	152.126	0	0		0	28.1329	0	0
0			0		0			0		0			0		0			0		0			0		0			0		0			0		0			0		0			0		0			0
0	177.739	0	0		0	25.0926	0	0		0	119.19	0	0		0	28.2292	0	0		0	155.783	0	0		0	28.2292	0	0		0	197.604	0	0		0	83.6421	0	0		0	152.647	0	0		0	28.2292	0	0
0			0		0			0		0			0		0			0		0			0		0			0		0			0		0			0		0			0		0			0
0	178.346	0	0		0	25.1783	0	0		0	119.597	0	0		0	28.3255	0	0		0	156.315	0	0		0	28.3255	0	0		0	198.279	0	0		3.10843	83.9275	3.7037	3.62916		3.48109	153.168	2.27273	0.0318652		0	28.3255	0	0
0			0		0			0		0			0		0			0		0			0		0			0		0			0		0			0		0			0		0			0
0	178.953	0	0		0	25.2639	0	0		0	120.004	0	0		0	28.4219	0	0		3.73444	156.847	2.38095	62.2145		0	28.4219	0	0		2.26083	198.953	1.13636	47.2627		0	84.213	0	0		0	153.689	0	0		0	28.4219	0	0
0			0		0			0		0			0		0			0		0			0		0			0		0			0		0			0		0			0		0			0
0	179.559	0	0		0	25.3495	0	0		0	120.41	0	0		0	28.5182	0	0		0	157.378	0	0		0	28.5182	0	0		0	199.628	0	0		0	84.4985	0	0		0	154.21	0	0		0	28.5182	0	0
0			0		0			0		0			0		0			0		0			0		0			0		0			0		0			0		0			0		0			0
0	180.166	0	0		0	25.4352	0	0		0	120.817	0	0		0	28.6146	0	0		0	157.91	0	0		0	28.6146	0	0		0	200.302	0	0		0	84.7839	0	0		0	154.731	0	0		0	28.6146	0	0
0			0		0			0		0			0		0			0		0			0		0			0		0			0		0			0		0			0		0			0
0	180.773	0	0		2.57786	25.5208	10.101	0.397082		0	121.224	0	0		0	28.7109	0	0		3.77242	158.442	2.38095	58.3923		0	28.7109	0	0		0	200.976	0	0		0	85.0694	0	0		5.29267	155.252	3.40909	0.364083		0	28.7109	0	0
0			0		0			0		0			0		0			0		0			0		0			0		0			0		0			0		0			0		0			0
0	181.379	0	0		0	25.6065	0	0		0	121.631	0	0		0	28.8073	0	0		0	158.974	0	0		0	28.8073	0	0		0	201.651	0	0		0	85.3549	0	0		0	155.773	0	0		0	28.8073	0	0
0			0		0			0		0			0		0			0		0			0		0			0		0			0		0			0		0			0		0			0
0	181.986	0	0		0	25.6921	0	0		3.38993	122.037	2.77778	7.07141		0	28.9036	0	0		0	159.505	0	0		0	28.9036	0	0		0	202.325	0	0		1.58593	85.6403	1.85185	1.24096		0	156.294	0	0		0	28.9036	0	0
0			0		0			0		0			0		0			0		0			0		0			0		0			0		0			0		0			0		0			0
0	182.592	0	0		0	25.7777	0	0		0	122.444	0	0		0	29	0	0		0	160.037	0	0		0	29	0	0		0	203	0	0		0	85.9258	0	0		3.56397	156.815	2.27273	0.530398		0	29	0	0
0			0		0			0		0			0		0			0		0			0		0			0		0			0		0			0		0			0		0			0
0	183.199	0	0		0	25.8634	0	0		0	122.851	0	0		0	29.0963	0	0		0	160.569	0	0		0	29.0963	0	0		0	203.674	0	0		0	86.2113	0	0		0	157.336	0	0		0	29.0963	0	0
0			0		0			0		0			0		0			0		0			0		0			0		0			0		0			0		0			0		0			0
0	183.806	0	0		0	25.949	0	0		0	123.258	0	0		2.43272	29.1927	8.33333	0.0889299		0	161.1	0	0		1.60399	29.1927	5.49451	1.12901		0	204.349	0	0		0	86.4967	0	0		0	157.857	0	0		0.995204	29.1927	3.40909	0.549487
0			0		0			0		0			0		0			0		0			0		0			0		0			0		0			0		0			0		0			0
0	184.412	0	0		0	26.0347	0	0		0	123.665	0	0		0	29.289	0	0		0	161.632	0	0		0	29.289	0	0		0	205.023	0	0		0	86.7822	0	0		0	158.377	0	0		0	29.289	0	0
0			0		0			0		0			0		0			0		0			0		0			0		0			0		0			0		0			0		0			0
0	185.019	0	0		0	26.1203	0	0		0	124.071	0	0		0	29.3853	0	0		0	162.163	0	0		0	29.3853	0	0		0	205.697	0	0		0	87.0677	0	0		3.61133	158.899	2.27273	1.08669		0	29.3853	0	0
0			0		0			0		0			0		0			0		0			0		0			0		0			0		0			0		0			0		0			0
0	185.625	0	0		0	26.206	0	0		0	124.478	0	0		0	29.4817	0	0		0	162.695	0	0		0	29.4817	0	0		0	206.372	0	0		0	87.3531	0	0		0	159.419	0	0		0	29.4817	0	0
0			0		0			0		0			0		0			0		0			0		0			0		0			0		0			0		0			0		0			0
0	186.232	0	0		0	26.2916	0	0		0	124.885	0	0		0	29.578	0	0		0	163.227	0	0		0	29.578	0	0		0	207.046	0	0		0.811469	87.6386	0.925926	0.354524		0	159.94	0	0		0	29.578	0	0
0			0		0			0		0			0		0			0		0			0		0			0		0			0		0			0		0			0		0			0
0	186.839	0	0		0	26.3772	0	0		0	125.292	0	0		0	29.6744	0	0		0	163.759	0	0		0	29.6744	0	0		2.36046	207.721	1.13636	35.2857		0	87.9241	0	0		3.64685	160.462	2.27273	1.63348		0	29.6744	0	0
0			0		0			0		0			0		0			0		0			0		0			0		0			0		0			0		0			0		0			0
0	187.445	0	0		0	26.4629	0	0		6.98326	125.699	5.55556	8.39704		0	29.7707	0	0		0	164.29	0	0		0	29.7707	0	0		0	208.395	0	0		0	88.2095	0	0		0	160.982	0	0		0	29.7707	0	0
0			0		0			0		0			0		0			0		0			0		0			0		0			0		0			0		0			0		0			0
0	188.052	0	0		0	26.5485	0	0		0	126.105	0	0		0	29.8671	0	0		0	164.822	0	0		0	29.8671	0	0		0	209.07	0	0		0	88.495	0	0		0	161.503	0	0		0	29.8671	0	0
0			0		0			0		0			0		0			0		0			0		0			0		0			0		0			0		0			0		0			0
0	188.659	0	0		0	26.6341	0	0		0	126.512	0	0		0	29.9634	0	0		0	165.354	0	0		0	29.9634	0	0		2.38345	209.744	1.13636	32.7698		0	88.7805	0	0		0	162.024	0	0		0	29.9634	0	0
0			0		0			0		0			0		0			0		0			0		0			0		0			0		0			0		0			0		0			0
0	189.265	0	0		0	26.7198	0	0		0	126.919	0	0		0	30.0598	0	0		0	165.885	0	0		0	30.0598	0	0		0	210.418	0	0		0	89.066	0	0		3.69421	162.545	2.27273	2.53521		0	30.0598	0	0
0			0		0			0		0			0		0			0		0			0		0			0		0			0		0			0		0			0		0			0
4.21937	189.872	2.22222	20.1902		0	26.8054	0	0		0	127.326	0	0		0	30.1561	0	0		0	166.417	0	0		0	30.1561	0	0		0	211.093	0	0		1.65466	89.3514	1.85185	0.370842		0	163.066	0	0		0	30.1561	0	0
0			0		0			0		0			0		0			0		0			0		0			0		0			0		0			0		0			0		0			0
0	190.478	0	0		0	26.8911	0	0		3.54813	127.733	2.77778	2.9242		0	30.2524	0	0		0	166.949	0	0		0	30.2524	0	0		4.81289	211.767	2.27273	60.694		0	89.6369	0	0		0	163.587	0	0		0	30.2524	0	0
0			0		0			0		0			0		0			0		0			0		0			0		0			0		0			0		0			0		0			0
0	191.085	0	0		0	26.9767	0	0		0	128.139	0	0		0	30.3488	0	0		0	167.48	0	0		0	30.3488	0	0		0	212.442	0	0		0	89.9224	0	0		5.5946	164.108	3.40909	5.01156		0	30.3488	0	0
0			0		0			0		0			0		0			0		0			0		0			0		0			0		0			0		0			0		0			0
0	191.692	0	0		0	27.0623	0	0		0	128.546	0	0		0	30.4451	0	0		0	168.012	0	0		0	30.4451	0	0		2.42177	213.116	1.13636	28.7835		0	90.2078	0	0		0	164.629	0	0		0	30.4451	0	0
0			0		0			0		0			0		0			0		0			0		0			0		0			0		0			0		0			0		0			0
0	192.298	0	0		0	27.148	0	0		0	128.953	0	0		0	30.5415	0	0		0	168.544	0	0		0	30.5415	0	0		0	213.79	0	0		0	90.4933	0	0		0	165.15	0	0		0	30.5415	0	0
0			0		0			0		0			0		0			0		0			0		0			0		0			0		0			0		0			0		0			0
0	192.905	0	0		0	27.2336	0	0		0	129.36	0	0		0	30.6378	0	0		0	169.075	0	0		0	30.6378	0	0		0	214.465	0	0		0	90.7788	0	0		0	165.671	0	0		0	30.6378	0	0
0			0		0			0		0			0		0			0		0			0		0			0		0			0		0			0		0			0		0			0
0	193.512	0	0		1.93167	27.3193	7.07071	1.01091		0	129.767	0	0		0	30.7342	0	0		0	169.607	0	0		0	30.7342	0	0		0	215.139	0	0		0	91.0642	0	0		0	166.192	0	0		0	30.7342	0	0
0			0		0			0		0			0		0			0		0			0		0			0		0			0		0			0		0			0		0			0
0	194.118	0	0		0	27.4049	0	0		0	130.173	0	0		0	30.8305	0	0		0	170.139	0	0		0	30.8305	0	0		0	215.814	0	0		0	91.3497	0	0		0	166.713	0	0		0	30.8305	0	0
0			0		0			0		0			0		0			0		0			0		0			0		0			0		0			0		0			0		0			0
0	194.725	0	0		0	27.4905	0	0		0	130.58	0	0		0	30.9269	0	0		0	170.671	0	0		0	30.9269	0	0		0	216.488	0	0		0	91.6352	0	0		0	167.234	0	0		0	30.9269	0	0
0			0		0			0		0			0		0			0		0			0		0			0		0			0		0			0		0			0		0			0
8.68139	195.331	4.44444	27.0771		0	27.5762	0	0		0	130.987	0	0		2.58527	31.0232	8.33333	0.683348		0	171.202	0	0		2.21594	31.0232	7.14286	2.89249		2.46776	217.162	1.13636	24.3411		0	91.9206	0	0		0	167.755	0	0		3.17283	31.0232	10.2273	3.49443
0			0		0			0		0			0		0			0		0			0		0			0		0			0		0			0		0			0		0			0
0	195.938	0	0		0	27.6618	0	0		0	131.394	0	0		0	31.1196	0	0		0	171.734	0	0		0	31.1196	0	0		0	217.837	0	0		0	92.2061	0	0		0	168.276	0	0		0	31.1196	0	0
0			0		0			0		0			0		0			0		0			0		0			0		0			0		0			0		0			0		0			0
0	196.545	0	0		0	27.7475	0	0		0	131.8	0	0		0	31.2159	0	0		0	172.266	0	0		0	31.2159	0	0		0	218.511	0	0		0	92.4916	0	0		0	168.797	0	0		0	31.2159	0	0
0			0		0			0		0			0		0			0		0			0		0			0		0			0		0			0		0			0		0			0
4.38114	197.151	2.22222	11.6157		0	27.8331	0	0		0	132.207	0	0		0	31.3122	0	0		0	172.797	0	0		0	31.3122	0	0		0	219.186	0	0		0	92.777	0	0		0	169.318	0	0		0	31.3122	0	0
0			0		0			0		0			0		0			0		0			0		0			0		0			0		0			0		0			0		0			0
0	197.758	0	0		0	27.9187	0	0		0	132.614	0	0		0	31.4086	0	0		8.25376	173.329	4.7619	57.1243		0	31.4086	0	0		0	219.86	0	0		1.72338	93.0625	1.85185	0.0108061		1.92999	169.839	1.13636	3.6229		0	31.4086	0	0
0			0		0			0		0			0		0			0		0			0		0			0		0			0		0			0		0			0		0			0
0	198.364	0	0		0	28.0044	0	0		0	133.021	0	0		0	31.5049	0	0		0	173.861	0	0		0	31.5049	0	0		0	220.535	0	0		0	93.348	0	0		0	170.36	0	0		0	31.5049	0	0
0			0		0			0		0			0		0			0		0			0		0			0		0			0		0			0		0			0		0			0
0	198.971	0	0		0	28.09	0	0		0	133.428	0	0		0	31.6013	0	0		0	174.392	0	0		0	31.6013	0	0		0	221.209	0	0		0	93.6334	0	0		0	170.881	0	0		0	31.6013	0	0
0			0		0			0		0			0		0			0		0			0		0			0		0			0		0			0		0			0		0			0
0	199.578	0	0		0	28.1757	0	0		0	133.834	0	0		0	31.6976	0	0		0	174.924	0	0		0	31.6976	0	0		0	221.883	0	0		0	93.9189	0	0		5.84325	171.402	3.40909	12.8547		0	31.6976	0	0
0			0		0			0		0			0		0			0		0			0		0			0		0			0		0			0		0			0		0			0
0	200.184	0	0		0	28.2613	0	0		0	134.241	0	0		0	31.794	0	0		0	175.456	0	0		0	31.794	0	0		0	222.558	0	0		0	94.2044	0	0		0	171.923	0	0		0	31.794	0	0
0			0		0			0		0			0		0			0		0			0		0			0		0			0		0			0		0			0		0			0
0	200.791	0	0		0	28.3469	0	0		0	134.648	0	0		0	31.8903	0	0		0	175.987	0	0		0	31.8903	0	0		0	223.232	0	0		0	94.4898	0	0		0	172.444	0	0		0	31.8903	0	0
0			0		0			0		0			0		0			0		0			0		0			0		0			0		0			0		0			0		0			0
0	201.398	0	0		0	28.4326	0	0		0	135.055	0	0		0	31.9867	0	0		0	176.519	0	0		0	31.9867	0	0		0	223.907	0	0		1.7551	94.7753	1.85185	0.0166743		0	172.965	0	0		0	31.9867	0	0
0			0		0			0		0			0		0			0		0			0		0			0		0			0		0			0		0			0		0			0
0	202.004	0	0		0	28.5182	0	0		0	135.462	0	0		0	32.083	0	0		4.21549	177.051	2.38095	22.7536		0	32.083	0	0		0	224.581	0	0		0	95.0608	0	0		3.94286	173.486	2.27273	10.5078		0	32.083	0	0
0			0		0			0		0			0		0			0		0			0		0			0		0			0		0			0		0			0		0			0
0	202.611	0	0		0	28.6039	0	0		0	135.868	0	0		0	32.1794	0	0		0	177.582	0	0		0	32.1794	0	0		0	225.256	0	0		0	95.3462	0	0		0	174.007	0	0		0	32.1794	0	0
0			0		0			0		0			0		0			0		0			0		0			0		0			0		0			0		0			0		0			0
0	203.217	0	0		0	28.6895	0	0		0	136.275	0	0		0	32.2757	0	0		0	178.114	0	0		0	32.2757	0	0		2.56739	225.93	1.13636	15.9925		0	95.6317	0	0		0	174.528	0	0		0	32.2757	0	0
0			0		0			0		0			0		0			0		0			0		0			0		0			0		0			0		0			0		0			0
0	203.824	0	0		0	28.7752	0	0		3.79672	136.682	2.77778	0.0477255		0	32.3721	0	0		0	178.646	0	0		0	32.3721	0	0		0	226.604	0	0		0	95.9172	0	0		9.94595	175.049	5.68182	30.2272		0	32.3721	0	0
0			0		0			0		0			0		0			0		0			0		0			0		0			0		0			0		0			0		0			0
4.5429	204.431	2.22222	5.39648		0	28.8608	0	0		0	137.089	0	0		0	32.4684	0	0		0	179.177	0	0		0	32.4684	0	0		0	227.279	0	0		0	96.2027	0	0		0	175.57	0	0		0	32.4684	0	0
0			0		0			0		0			0		0			0		0			0		0			0		0			0		0			0		0			0		0			0
0	205.037	0	0		0	28.9464	0	0		0	137.496	0	0		0	32.5647	0	0		0	179.709	0	0		0	32.5647	0	0		5.18075	227.953	2.27273	28.6279		0	96.4881	0	0		0	176.091	0	0		0	32.5647	0	0
0			0		0			0		0			0		0			0		0			0		0			0		0			0		0			0		0			0		0			0
0	205.644	0	0		0	29.0321	0	0		0	137.902	0	0		0	32.6611	0	0		0	180.241	0	0		0	32.6611	0	0		0	228.628	0	0		0.896052	96.7736	0.925926	0.0804252		0	176.612	0	0		0	32.6611	0	0
0			0		0			0		0			0		0			0		0			0		0			0		0			0		0			0		0			0		0			0
4.58334	206.25	2.22222	4.20963		0	29.1177	0	0		0	138.309	0	0		0	32.7574	0	0		0	180.773	0	0		0	32.7574	0	0		0	229.302	0	0		0	97.059	0	0		6.03862	177.133	3.40909	21.5617		0	32.7574	0	0
0			0		0			0		0			0		0			0		0			0		0			0		0			0		0			0		0			0		0			0
0	206.857	0	0		2.94983	29.2034	10.101	3.24191		7.70644	138.716	5.55556	0.0290509		0.912605	32.8538	2.77778	0.612086		0	181.304	0	0		2.16618	32.8538	6.59341	4.42705		0	229.976	0	0		0	97.3445	0	0		0	177.654	0	0		1.86669	32.8538	5.68182	3.34768
0			0		0			0		0			0		0			0		0			0		0			0		0			0		0			0		0			0		0			0
0	207.464	0	0		0	29.289	0	0		0	139.123	0	0		0	32.9501	0	0		0	181.836	0	0		0	32.9501	0	0		0	230.651	0	0		0	97.63	0	0		0	178.175	0	0		0	32.9501	0	0
0			0		0			0		0			0		0			0		0			0		0			0		0			0		0			0		0			0		0			0
4.62378	208.07	2.22222	3.17003		0	29.3746	0	0		0	139.53	0	0		0	33.0465	0	0		0	182.368	0	0		0	33.0465	0	0		2.6287	231.325	1.13636	11.7232		0	97.9155	0	0		2.03063	178.696	1.13636	8.1083		0	33.0465	0	0
0			0		0			0		0			0		0			0		0			0		0			0		0			0		0			0		0			0		0			0
0	208.677	0	0		0	29.4603	0	0		0	139.936	0	0		0	33.1428	0	0		0	182.899	0	0		0	33.1428	0	0		0	232	0	0		0	98.2009	0	0		0	179.217	0	0		0	33.1428	0	0
0			0		0			0		0			0		0			0		0			0		0			0		0			0		0			0		0			0		0			0
0	209.284	0	0		0	29.5459	0	0		0	140.343	0	0		0	33.2392	0	0		0	183.431	0	0		0	33.2392	0	0		0	232.674	0	0		0.911911	98.4864	0.925926	0.20107		0	179.738	0	0		0	33.2392	0	0
0			0		0			0		0			0		0			0		0			0		0			0		0			0		0			0		0			0		0			0
0	209.89	0	0		0	29.6316	0	0		0	140.75	0	0		0	33.3355	0	0		4.38006	183.963	2.38095	13.7162		0	33.3355	0	0		0	233.349	0	0		0	98.7719	0	0		0	180.259	0	0		0	33.3355	0	0
0			0		0			0		0			0		0			0		0			0		0			0		0			0		0			0		0			0		0			0
0	210.497	0	0		0	29.7172	0	0		0	141.157	0	0		0	33.4318	0	0		0	184.494	0	0		0	33.4318	0	0		0	234.023	0	0		0	99.0573	0	0		2.05431	180.78	1.13636	9.42277		0	33.4318	0	0
0			0		0			0		0			0		0			0		0			0		0			0		0			0		0			0		0			0		0			0
0	211.103	0	0		0	29.8028	0	0		0	141.564	0	0		0	33.5282	0	0		0	185.026	0	0		0	33.5282	0	0		0	234.697	0	0		0	99.3428	0	0		0	181.301	0	0		0	33.5282	0	0
0			0		0			0		0			0		0			0		0			0		0			0		0			0		0			0		0			0		0			0
0	211.71	0	0		0	29.8885	0	0		0	141.97	0	0		0	33.6245	0	0		0	185.558	0	0		0	33.6245	0	0		0	235.372	0	0		0	99.6283	0	0		0	181.822	0	0		0	33.6245	0	0
0			0		0			0		0			0		0			0		0			0		0			0		0			0		0			0		0			0		0			0
0	212.317	0	0		0	29.9741	0	0		7.90984	142.377	5.55556	1.06791		0	33.7209	0	0		4.4307	186.089	2.38095	11.3932		0	33.7209	0	0		0	236.046	0	0		0	99.9137	0	0		0	182.343	0	0		0	33.7209	0	0
0			0		0			0		0			0		0			0		0			0		0			0		0			0		0			0		0			0		0			0
0	212.923	0	0		0	30.0598	0	0		0	142.784	0	0		0	33.8172	0	0		0	186.621	0	0		0	33.8172	0	0		10.76	236.721	4.54545	32.4619		3.71108	100.199	3.7037	1.50417		0	182.863	0	0		0	33.8172	0	0
0			0		0			0		0			0		0			0		0			0		0			0		0			0		0			0		0			0		0			0
0	213.53	0	0		0	30.1454	0	0		0	143.191	0	0		0	33.9136	0	0		0	187.153	0	0		0	33.9136	0	0		0	237.395	0	0		0	100.485	0	0		0	183.385	0	0		0	33.9136	0	0
0			0		0			0		0			0		0			0		0			0		0			0		0			0		0			0		0			0		0			0
0	214.137	0	0		0	30.231	0	0		0	143.597	0	0		0	34.0099	0	0		4.46868	187.684	2.38095	9.79224		0	34.0099	0	0		0	238.069	0	0		0	100.77	0	0		0	183.905	0	0		0	34.0099	0	0
0			0		0			0		0			0		0			0		0			0		0			0		0			0		0			0		0			0		0			0
0	214.743	0	0		0	30.3167	0	0		0	144.004	0	0		0	34.1063	0	0		0	188.216	0	0		0	34.1063	0	0		5.42599	238.744	2.27273	13.8664		0	101.056	0	0		6.28727	184.427	3.40909	35.8819		0	34.1063	0	0
0			0		0			0		0			0		0			0		0			0		0			0		0			0		0			0		0			0		0			0
4.78555	215.35	2.22222	0.483435		0	30.4023	0	0		0	144.411	0	0		0	34.2026	0	0		0	188.748	0	0		0	34.2026	0	0		0	239.418	0	0		0	101.341	0	0		0	184.947	0	0		0	34.2026	0	0
0			0		0			0		0			0		0			0		0			0		0			0		0			0		0			0		0			0		0			0
0	215.956	0	0		0	30.488	0	0		0	144.818	0	0		0	34.299	0	0		0	189.279	0	0		0	34.299	0	0		0	240.093	0	0		0	101.626	0	0		0	185.468	0	0		0	34.299	0	0
0			0		0			0		0			0		0			0		0			0		0			0		0			0		0			0		0			0		0			0
0	216.563	0	0		0	30.5736	0	0		0	145.225	0	0		0	34.3953	0	0		0	189.811	0	0		0	34.3953	0	0		0	240.767	0	0		0	101.912	0	0		2.11352	185.989	1.13636	13.1408		0	34.3953	0	0
0			0		0			0		0			0		0			0		0			0		0			0		0			0		0			0		0			0		0			0
0	217.17	0	0		0	30.6592	0	0		0	145.631	0	0		0	34.4916	0	0		0	190.343	0	0		0	34.4916	0	0		0	241.441	0	0		4.73137	102.198	4.62963	3.24423		0	186.51	0	0		0	34.4916	0	0
0			0		0			0		0			0		0			0		0			0		0			0		0			0		0			0		0			0		0			0
0	217.776	0	0		0	30.7449	0	0		4.05662	146.038	2.77778	1.79803		0	34.588	0	0		0	190.875	0	0		0	34.588	0	0		0	242.116	0	0		0	102.483	0	0		0	187.031	0	0		0	34.588	0	0
0			0		0			0		0			0		0			0		0			0		0			0		0			0		0			0		0			0		0			0
0	218.383	0	0		0	30.8305	0	0		0	146.445	0	0		1.92691	34.6843	5.55556	2.36511		0	191.406	0	0		1.90573	34.6843	5.49451	5.52167		5.51796	242.79	2.27273	9.69519		0	102.768	0	0		0	187.552	0	0		2.36484	34.6843	6.81818	6.16176
0			0		0			0		0			0		0			0		0			0		0			0		0			0		0			0		0			0		0			0
4.86643	218.989	2.22222	0.0233236		0	30.9162	0	0		0	146.852	0	0		0	34.7807	0	0		0	191.938	0	0		0	34.7807	0	0		0	243.465	0	0		0	103.054	0	0		10.686	188.073	5.68182	74.0033		0	34.7807	0	0
0			0		0			0		0			0		0			0		0			0		0			0		0			0		0			0		0			0		0			0
0	219.596	0	0		3.13149	31.0018	10.101	5.62693		0	147.259	0	0		0	34.877	0	0		0	192.47	0	0		0	34.877	0	0		2.77431	244.139	1.13636	4.23513		0	103.339	0	0		0	188.594	0	0		0	34.877	0	0
0			0		0			0		0			0		0			0		0			0		0			0		0			0		0			0		0			0		0			0
0	220.203	0	0		0	31.0874	0	0		4.10181	147.665	2.77778	2.59883		0	34.9734	0	0		0	193.001	0	0		0	34.9734	0	0		0	244.814	0	0		0	103.625	0	0		0	189.115	0	0		0	34.9734	0	0
0			0		0			0		0			0		0			0		0			0		0			0		0			0		0			0		0			0		0			0
0	220.809	0	0		0	31.1731	0	0		0	148.072	0	0		0	35.0697	0	0		4.60793	193.533	2.38095	4.95869		0	35.0697	0	0		0	245.488	0	0		3.84853	103.91	3.7037	3.76611		2.15496	189.636	1.13636	16.1103		0	35.0697	0	0
0			0		0			0		0			0		0			0		0			0		0			0		0			0		0			0		0			0		0			0
0	221.416	0	0		0	31.2587	0	0		0	148.479	0	0		0	35.1661	0	0		0	194.065	0	0		0	35.1661	0	0		8.3919	246.162	3.40909	10.1818		0	104.196	0	0		0	190.157	0	0		0	35.1661	0	0
0			0		0			0		0			0		0			0		0			0		0			0		0			0		0			0		0			0		0			0
0	222.023	0	0		0	31.3444	0	0		0	148.886	0	0		0	35.2624	0	0		0	194.596	0	0		0	35.2624	0	0		0	246.837	0	0		0	104.481	0	0		0	190.678	0	0		0	35.2624	0	0
0			0		0			0		0			0		0			0		0			0		0			0		0			0		0			0		0			0		0			0
0	222.629	0	0		0	31.43	0	0		0	149.292	0	0		0	35.3588	0	0		4.6459	195.128	2.38095	3.92316		0	35.3588	0	0		0	247.511	0	0		0	104.767	0	0		0	191.199	0	0		0	35.3588	0	0
0			0		0			0		0			0		0			0		0			0		0			0		0			0		0			0		0			0		0			0
0	223.236	0	0		0	31.5156	0	0		4.15831	149.699	2.77778	3.80675		0	35.4551	0	0		0	195.66	0	0		0	35.4551	0	0		0	248.186	0	0		0	105.052	0	0		2.17864	191.72	1.13636	17.9431		0	35.4551	0	0
0			0		0			0		0			0		0			0		0			0		0			0		0			0		0			0		0			0		0			0
0	223.842	0	0		0	31.6013	0	0		0	150.106	0	0		0	35.5515	0	0		0	196.191	0	0		0	35.5515	0	0		0	248.86	0	0		0	105.338	0	0		0	192.241	0	0		0	35.5515	0	0
0			0		0			0		0			0		0			0		0			0		0			0		0			0		0			0		0			0		0			0
0	224.449	0	0		0	31.6869	0	0		0	150.513	0	0		0	35.6478	0	0		0	196.723	0	0		0	35.6478	0	0		0	249.535	0	0		1.95598	105.623	1.85185	2.57708		0	192.762	0	0		0	35.6478	0	0
0			0		0			0		0			0		0			0		0			0		0			0		0			0		0			0		0			0		0			0
0	225.056	0	0		0	31.7726	0	0		0	150.92	0	0		0	35.7441	0	0		0	197.255	0	0		0	35.7441	0	0		0	250.209	0	0		0	105.909	0	0		2.1964	193.283	1.13636	19.3823		0	35.7441	0	0
0			0		0			0		0			0		0			0		0			0		0			0		0			0		0			0		0			0		0			0
0	225.662	0	0		0	31.8582	0	0		16.8141	151.327	11.1111	19.7543		0	35.8405	0	0		0	197.786	0	0		0	35.8405	0	0		0	250.883	0	0		0	106.194	0	0		0	193.804	0	0		0	35.8405	0	0
0			0		0			0		0			0		0			0		0			0		0			0		0			0		0			0		0			0		0			0
0	226.269	0	0		0	31.9439	0	0		0	151.733	0	0		0	35.9368	0	0		0	198.318	0	0		0	35.9368	0	0		8.57583	251.558	3.40909	4.81676		0	106.48	0	0		0	194.325	0	0		0	35.9368	0	0
0			0		0			0		0			0		0			0		0			0		0			0		0			0		0			0		0			0		0			0
0	226.875	0	0		0	32.0295	0	0		0	152.14	0	0		0	36.0332	0	0		0	198.85	0	0		0	36.0332	0	0		0	252.232	0	0		0	106.765	0	0		0	194.846	0	0		0	36.0332	0	0
0			0		0			0		0			0		0			0		0			0		0			0		0			0		0			0		0			0		0			0
0	227.482	0	0		0	32.1151	0	0		0	152.547	0	0		0	36.1295	0	0		0	199.381	0	0		0	36.1295	0	0		0	252.907	0	0		0	107.05	0	0		0	195.367	0	0		0	36.1295	0	0
0			0		0			0		0			0		0			0		0			0		0			0		0			0		0			0		0			0		0			0
5.06864	228.089	2.22222	1.44895		0	32.2008	0	0		0	152.954	0	0		0	36.2259	0	0		0	199.913	0	0		0	36.2259	0	0		2.8816	253.581	1.13636	1.10553		0	107.336	0	0		0	195.888	0	0		0	36.2259	0	0
0			0		0			0		0			0		0			0		0			0		0			0		0			0		0			0		0			0		0			0
0	228.695	0	0		0	32.2864	0	0		0	153.36	0	0		0	36.3222	0	0		4.77249	200.445	2.38095	1.34626		0	36.3222	0	0		0	254.256	0	0		3.98598	107.621	3.7037	7.04822		0	196.409	0	0		0	36.3222	0	0
0			0		0			0		0			0		0			0		0			0		0			0		0			0		0			0		0			0		0			0
0	229.302	0	0		0	32.3721	0	0		0	153.767	0	0		0	36.4186	0	0		0	200.976	0	0		0	36.4186	0	0		0	254.93	0	0		0	107.907	0	0		2.23784	196.93	1.13636	22.9565		0	36.4186	0	0
0			0		0			0		0			0		0			0		0			0		0			0		0			0		0			0		0			0		0			0
0	229.909	0	0		0	32.4577	0	0		0	154.174	0	0		1.0143	36.5149	2.77778	1.93919		0	201.508	0	0		1.80568	36.5149	4.94505	6.95012		5.80919	255.604	2.27273	1.39699		0	108.192	0	0		0	197.451	0	0		0.829884	36.5149	2.27273	2.92108
0			0		0			0		0			0		0			0		0			0		0			0		0			0		0			0		0			0		0			0
0	230.515	0	0		0	32.5433	0	0		0	154.581	0	0		0	36.6112	0	0		0	202.04	0	0		0	36.6112	0	0		0	256.279	0	0		0	108.478	0	0		0	197.972	0	0		0	36.6112	0	0
0			0		0			0		0			0		0			0		0			0		0			0		0			0		0			0		0			0		0			0
0	231.122	0	0		0	32.629	0	0		0	154.988	0	0		0	36.7076	0	0		0	202.571	0	0		0	36.7076	0	0		5.83984	256.953	2.27273	0.957664		0	108.763	0	0		0	198.493	0	0		0	36.7076	0	0
0			0		0			0		0			0		0			0		0			0		0			0		0			0		0			0		0			0		0			0
0	231.728	0	0		0	32.7146	0	0		0	155.394	0	0		0	36.8039	0	0		0	203.103	0	0		0	36.8039	0	0		0	257.627	0	0		0	109.049	0	0		0	199.014	0	0		0	36.8039	0	0
0			0		0			0		0			0		0			0		0			0		0			0		0			0		0			0		0			0		0			0
0	232.335	0	0		1.65658	32.8002	5.05051	4.33268		0	155.801	0	0		0	36.9003	0	0		0	203.635	0	0		0	36.9003	0	0		0	258.302	0	0		1.01235	109.334	0.925926	2.22678		0	199.535	0	0		0	36.9003	0	0
0			0		0			0		0			0		0			0		0			0		0			0		0			0		0			0		0			0		0			0
0	232.942	0	0		0	32.8859	0	0		0	156.208	0	0		0	36.9966	0	0		4.86111	204.167	2.38095	0.343392		0	36.9966	0	0		14.7146	258.976	5.68182	1.13427		0	109.62	0	0		0	200.056	0	0		0	36.9966	0	0
0			0		0			0		0			0		0			0		0			0		0			0		0			0		0			0		0			0		0			0
5.18996	233.548	2.22222	4.07062		0	32.9715	0	0		4.35041	156.615	2.77778	9.63278		0	37.093	0	0		0	204.698	0	0		0	37.093	0	0		0	259.651	0	0		0	109.905	0	0		4.55856	200.577	2.27273	53.6656		0	37.093	0	0
0			0		0			0		0			0		0			0		0			0		0			0		0			0		0			0		0			0		0			0
0	234.155	0	0		0	33.0572	0	0		0	157.022	0	0		0	37.1893	0	0		0	205.23	0	0		0	37.1893	0	0		0	260.325	0	0		0	110.191	0	0		0	201.098	0	0		0	37.1893	0	0
0			0		0			0		0			0		0			0		0			0		0			0		0			0		0			0		0			0		0			0
0	234.762	0	0		0	33.1428	0	0		0	157.428	0	0		0	37.2857	0	0		0	205.762	0	0		0	37.2857	0	0		0	261	0	0		0	110.476	0	0		0	201.619	0	0		0	37.2857	0	0
0			0		0			0		0			0		0			0		0			0		0			0		0			0		0			0		0			0		0			0
15.6912	235.368	6.66667	15.7168		0	33.2285	0	0		0	157.835	0	0		0	37.382	0	0		4.91174	206.293	2.38095	0.0664811		0	37.382	0	0		0	261.674	0	0		0	110.761	0	0		0	202.14	0	0		0	37.382	0	0
0			0		0			0		0			0		0			0		0			0		0			0		0			0		0			0		0			0		0			0
0	235.975	0	0		0	33.3141	0	0		0	158.242	0	0		0	37.4783	0	0		0	206.825	0	0		0	37.4783	0	0		2.98123	262.349	1.13636	0.0136482		0	111.047	0	0		0	202.661	0	0		0	37.4783	0	0
0			0		0			0		0			0		0			0		0			0		0			0		0			0		0			0		0			0		0			0
0	236.581	0	0		0	33.3997	0	0		0	158.649	0	0		0	37.5747	0	0		0	207.357	0	0		0	37.5747	0	0		0	263.023	0	0		3.09257	111.332	2.77778	8.51278		0	203.182	0	0		0	37.5747	0	0
0			0		0			0		0			0		0			0		0			0		0			0		0			0		0			0		0			0		0			0
10.5417	237.188	4.44444	13.1088		0	33.4854	0	0		0	159.055	0	0		0	37.671	0	0		4.94972	207.888	2.38095	0.000137126		0	37.671	0	0		0	263.697	0	0		0	111.618	0	0		0	203.703	0	0		0	37.671	0	0
0			0		0			0		0			0		0			0		0			0		0			0		0			0		0			0		0			0		0			0
0	237.795	0	0		0	33.571	0	0		0	159.462	0	0		0	37.7674	0	0		0	208.42	0	0		0	37.7674	0	0		6.00845	264.372	2.27273	0.0195421		0	111.903	0	0		0	204.224	0	0		0	37.7674	0	0
0			0		0			0		0			0		0			0		0			0		0			0		0			0		0			0		0			0		0			0
0	238.401	0	0		0	33.6566	0	0		0	159.869	0	0		0	37.8637	0	0		0	208.952	0	0		0	37.8637	0	0		0	265.046	0	0		0	112.189	0	0		0	204.745	0	0		0	37.8637	0	0
0			0		0			0		0			0		0			0		0			0		0			0		0			0		0			0		0			0		0			0
10.6226	239.008	4.44444	16.0342		0	33.7423	0	0		0	160.276	0	0		0	37.9601	0	0		4.9877	209.483	2.38095	0.0549451		0	37.9601	0	0		0	265.721	0	0		0	112.474	0	0		0	205.266	0	0		0	37.9601	0	0
0			0		0			0		0			0		0			0		0			0		0			0		0			0		0			0		0			0		0			0
0	239.614	0	0		0	33.8279	0	0		0	160.683	0	0		0	38.0564	0	0		0	210.015	0	0		0	38.0564	0	0		6.05443	266.395	2.27273	0.197862		0	112.76	0	0		0	205.787	0	0		0	38.0564	0	0
0			0		0			0		0			0		0			0		0			0		0			0		0			0		0			0		0			0		0			0
0	240.221	0	0		0	33.9136	0	0		0	161.089	0	0		0	38.1528	0	0		0	210.547	0	0		0	38.1528	0	0		0	267.069	0	0		2.09343	113.045	1.85185	6.84004		2.34441	206.308	1.13636	33.5351		0	38.1528	0	0
0			0		0			0		0			0		0			0		0			0		0			0		0			0		0			0		0			0		0			0
5.35173	240.828	2.22222	9.627		0	33.9992	0	0		0	161.496	0	0		1.06248	38.2491	2.77778	2.82772		0	211.078	0	0		1.26096	38.2491	3.2967	6.08814		3.04254	267.744	1.13636	0.210053		0	113.331	0	0		0	206.828	0	0		0.869298	38.2491	2.27273	3.88311
0			0		0			0		0			0		0			0		0			0		0			0		0			0		0			0		0			0		0			0
0	241.434	0	0		0	34.0849	0	0		0	161.903	0	0		0	38.3455	0	0		10.0767	211.61	4.7619	0.632949		0	38.3455	0	0		0	268.418	0	0		0	113.616	0	0		0	207.35	0	0		0	38.3455	0	0
0			0		0			0		0			0		0			0		0			0		0			0		0			0		0			0		0			0		0			0
0	242.041	0	0		0	34.1705	0	0		9.01722	162.31	5.55556	32.8513		0	38.4418	0	0		0	212.142	0	0		0	38.4418	0	0		0	269.093	0	0		0	113.902	0	0		0	207.87	0	0		0	38.4418	0	0
0			0		0			0		0			0		0			0		0			0		0			0		0			0		0			0		0			0		0			0
5.39217	242.648	2.22222	11.384		0	34.2561	0	0		0	162.717	0	0		0	38.5382	0	0		0	212.673	0	0		0	38.5382	0	0		6.13107	269.767	2.27273	0.908552		0	114.187	0	0		0	208.392	0	0		0	38.5382	0	0
0			0		0			0		0			0		0			0		0			0		0			0		0			0		0			0		0			0		0			0
0	243.254	0	0		0	34.3418	0	0		0	163.123	0	0		0	38.6345	0	0		5.07631	213.205	2.38095	0.653979		0	38.6345	0	0		0	270.442	0	0		0	114.473	0	0		0	208.912	0	0		0	38.6345	0	0
0			0		0			0		0			0		0			0		0			0		0			0		0			0		0			0		0			0		0			0
0	243.861	0	0		0	34.4274	0	0		0	163.53	0	0		0	38.7308	0	0		0	213.737	0	0		0	38.7308	0	0		0	271.116	0	0		4.2503	114.758	3.7037	16.2273		0	209.434	0	0		0	38.7308	0	0
0			0		0			0		0			0		0			0		0			0		0			0		0			0		0			0		0			0		0			0
0	244.468	0	0		0	34.5131	0	0		0	163.937	0	0		0	38.8272	0	0		0	214.268	0	0		0	38.8272	0	0		6.17705	271.79	2.27273	1.58304		0	115.043	0	0		0	209.954	0	0		0	38.8272	0	0
0			0		0			0		0			0		0			0		0			0		0			0		0			0		0			0		0			0		0			0
0	245.074	0	0		0	34.5987	0	0		0	164.344	0	0		0	38.9235	0	0		0	214.8	0	0		0	38.9235	0	0		0	272.465	0	0		0	115.329	0	0		0	210.475	0	0		0	38.9235	0	0
0			0		0			0		0			0		0			0		0			0		0			0		0			0		0			0		0			0		0			0
0	245.681	0	0		0	34.6843	0	0		0	164.751	0	0		0	39.0199	0	0		20.5078	215.332	9.52381	5.16968		0	39.0199	0	0		0	273.139	0	0		0	115.615	0	0		0	210.996	0	0		0	39.0199	0	0
0			0		0			0		0			0		0			0		0			0		0			0		0			0		0			0		0			0		0			0
0	246.287	0	0		0	34.77	0	0		0	165.157	0	0		0	39.1162	0	0		0	215.864	0	0		0	39.1162	0	0		3.11152	273.814	1.13636	1.22182		0	115.9	0	0		0	211.517	0	0		0	39.1162	0	0
0			0		0			0		0			0		0			0		0			0		0			0		0			0		0			0		0			0		0			0
0	246.894	0	0		0	34.8556	0	0		0	165.564	0	0		0	39.2126	0	0		0	216.395	0	0		0	39.2126	0	0		0	274.488	0	0		0	116.185	0	0		0	212.038	0	0		0	39.2126	0	0
0			0		0			0		0			0		0			0		0			0		0			0		0			0		0			0		0			0		0			0
0	247.501	0	0		0	34.9413	0	0		4.61031	165.971	2.77778	21.7439		0	39.3089	0	0		5.16493	216.927	2.38095	1.91262		0	39.3089	0	0		9.38054	275.162	3.40909	4.68106		0	116.471	0	0		0	212.559	0	0		0	39.3089	0	0
0			0		0			0		0			0		0			0		0			0		0			0		0			0		0			0		0			0		0			0
0	248.107	0	0		0	35.0269	0	0		0	166.378	0	0		0	39.4053	0	0		0	217.459	0	0		0	39.4053	0	0		0	275.837	0	0		2.16215	116.756	1.85185	9.73667		0	213.08	0	0		0	39.4053	0	0
0			0		0			0		0			0		0			0		0			0		0			0		0			0		0			0		0			0		0			0
0	248.714	0	0		0	35.1125	0	0		0	166.785	0	0		0	39.5016	0	0		0	217.99	0	0		0	39.5016	0	0		0	276.511	0	0		0	117.042	0	0		0	213.601	0	0		0	39.5016	0	0
0			0		0			0		0			0		0			0		0			0		0			0		0			0		0			0		0			0		0			0
0	249.32	0	0		0	35.1982	0	0		0	167.191	0	0		0	39.5979	0	0		0	218.522	0	0		0	39.5979	0	0		3.14984	277.186	1.13636	2.14571		0	117.327	0	0		0	214.122	0	0		0	39.5979	0	0
0			0		0			0		0			0		0			0		0			0		0			0		0			0		0			0		0			0		0			0
0	249.927	0	0		0	35.2838	0	0		4.6555	167.598	2.77778	24.3465		0	39.6943	0	0		5.21556	219.054	2.38095	2.92798		0	39.6943	0	0		0	277.86	0	0		0	117.613	0	0		0	214.643	0	0		0	39.6943	0	0
0			0		0			0		0			0		0			0		0			0		0			0		0			0		0			0		0			0		0			0
0	250.534	0	0		0	35.3695	0	0		0	168.005	0	0		0	39.7906	0	0		0	219.585	0	0		0	39.7906	0	0		0	278.534	0	0		0	117.898	0	0		0	215.164	0	0		0	39.7906	0	0
0			0		0			0		0			0		0			0		0			0		0			0		0			0		0			0		0			0		0			0
0	251.14	0	0		0	35.4551	0	0		0	168.412	0	0		0	39.887	0	0		0	220.117	0	0		0	39.887	0	0		9.51849	279.209	3.40909	8.47223		0	118.184	0	0		0	215.685	0	0		0	39.887	0	0
0			0		0			0		0			0		0			0		0			0		0			0		0			0		0			0		0			0		0			0
0	251.747	0	0		0	35.5407	0	0		0	168.819	0	0		0	39.9833	0	0		0	220.649	0	0		0	39.9833	0	0		0	279.883	0	0		3.29081	118.469	2.77778	16.8684		0	216.206	0	0		0	39.9833	0	0
0			0		0			0		0			0		0			0		0			0		0			0		0			0		0			0		0			0		0			0
0	252.353	0	0		0	35.6264	0	0		0	169.225	0	0		3.33997	40.0797	8.33333	11.8407		0	221.18	0	0		0.660654	40.0797	1.64835	3.91941		9.56447	280.558	3.40909	9.98413		0	118.755	0	0		0	216.727	0	0		0.910902	40.0797	2.27273	5.04689
0			0		0			0		0			0		0			0		0			0		0			0		0			0		0			0		0			0		0			0
0	252.96	0	0		0	35.712	0	0		4.712	169.632	2.77778	27.8069		0	40.176	0	0		0	221.712	0	0		0	40.176	0	0		0	281.232	0	0		0	119.04	0	0		0	217.248	0	0		0	40.176	0	0
0			0		0			0		0			0		0			0		0			0		0			0		0			0		0			0		0			0		0			0
11.2696	253.567	4.44444	50.0352		0	35.7977	0	0		0	170.039	0	0		0	40.2724	0	0		0	222.244	0	0		0	40.2724	0	0		0	281.907	0	0		0	119.326	0	0		0	217.769	0	0		0	40.2724	0	0
0			0		0			0		0			0		0			0		0			0		0			0		0			0		0			0		0			0		0			0
0	254.173	0	0		0	35.8833	0	0		0	170.446	0	0		0	40.3687	0	0		0	222.775	0	0		0	40.3687	0	0		6.42229	282.581	2.27273	8.32293		0	119.611	0	0		0	218.29	0	0		0	40.3687	0	0
0			0		0			0		0			0		0			0		0			0		0			0		0			0		0			0		0			0		0			0
0	254.78	0	0		0	35.9689	0	0		0	170.852	0	0		0	40.4651	0	0		0	223.307	0	0		0	40.4651	0	0		0	283.255	0	0		0	119.897	0	0		0	218.811	0	0		0	40.4651	0	0
0			0		0			0		0			0		0			0		0			0		0			0		0			0		0			0		0			0		0			0
11.3505	255.387	4.44444	55.6099		0	36.0546	0	0		0	171.259	0	0		0	40.5614	0	0		0	223.839	0	0		0	40.5614	0	0		0	283.93	0	0		0	120.182	0	0		0	219.332	0	0		0	40.5614	0	0
0			0		0			0		0			0		0			0		0			0		0			0		0			0		0			0		0			0		0			0
0	255.993	0	0		0	36.1402	0	0		0	171.666	0	0		0	40.6578	0	0		0	224.37	0	0		0	40.6578	0	0		6.46828	284.604	2.27273	10.1758		2.23088	120.467	1.85185	13.1434		0	219.853	0	0		0	40.6578	0	0
0			0		0			0		0			0		0			0		0			0		0			0		0			0		0			0		0			0		0			0
0	256.6	0	0		0	36.2259	0	0		0	172.073	0	0		0	40.7541	0	0		0	224.902	0	0		0	40.7541	0	0		0	285.279	0	0		0	120.753	0	0		0	220.374	0	0		0	40.7541	0	0
0			0		0			0		0			0		0			0		0			0		0			0		0			0		0			0		0			0		0			0
0	257.207	0	0		0	36.3115	0	0		0	172.48	0	0		0	40.8504	0	0		0	225.434	0	0		0	40.8504	0	0		9.7484	285.953	3.40909	17.2718		0	121.038	0	0		0	220.895	0	0		0	40.8504	0	0
0			0		0			0		0			0		0			0		0			0		0			0		0			0		0			0		0			0		0			0
0	257.813	0	0		0	36.3971	0	0		0	172.886	0	0		0	40.9468	0	0		5.38013	225.966	2.38095	7.71541		0	40.9468	0	0		0	286.627	0	0		0	121.324	0	0		0	221.416	0	0		0	40.9468	0	0
0			0		0			0		0			0		0			0		0			0		0			0		0			0		0			0		0			0		0			0
0	258.42	0	0		1.10554	36.4828	3.0303	5.07771		0	173.293	0	0		0	41.0431	0	0		0	226.497	0	0		0	41.0431	0	0		0	287.302	0	0		0	121.609	0	0		0	221.937	0	0		0	41.0431	0	0
0			0		0			0		0			0		0			0		0			0		0			0		0			0		0			0		0			0		0			0
5.75614	259.026	2.22222	33.8214		0	36.5684	0	0		0	173.7	0	0		0	41.1395	0	0		0	227.029	0	0		0	41.1395	0	0		0	287.976	0	0		0	121.895	0	0		0	222.458	0	0		0	41.1395	0	0
0			0		0			0		0			0		0			0		0			0		0			0		0			0		0			0		0			0		0			0
0	259.633	0	0		0	36.6541	0	0		0	174.107	0	0		0	41.2358	0	0		0	227.561	0	0		0	41.2358	0	0		0	288.651	0	0		3.39389	122.18	2.77778	22.3316		0	222.979	0	0		0	41.2358	0	0
0			0		0			0		0			0		0			0		0			0		0			0		0			0		0			0		0			0		0			0
0	260.24	0	0		0	36.7397	0	0		0	174.514	0	0		0	41.3322	0	0		0	228.092	0	0		0	41.3322	0	0		0	289.325	0	0		0	122.466	0	0		0	223.5	0	0		0	41.3322	0	0
0			0		0			0		0			0		0			0		0			0		0			0		0			0		0			0		0			0		0			0
5.79658	260.846	2.22222	37.0504		0	36.8254	0	0		4.8589	174.92	2.77778	37.8792		0	41.4285	0	0		0	228.624	0	0		0	41.4285	0	0		0	290	0	0		0	122.751	0	0		0	224.021	0	0		0	41.4285	0	0
0			0		0			0		0			0		0			0		0			0		0			0		0			0		0			0		0			0		0			0
0	261.453	0	0		0	36.911	0	0		0	175.327	0	0		0	41.5249	0	0		0	229.156	0	0		0	41.5249	0	0		0	290.674	0	0		0	123.037	0	0		0	224.542	0	0		0	41.5249	0	0
0			0		0			0		0			0		0			0		0			0		0			0		0			0		0			0		0			0		0			0
0	262.059	0	0		0	36.9966	0	0		0	175.734	0	0		0	41.6212	0	0		0	229.687	0	0		0	41.6212	0	0		0	291.348	0	0		0	123.322	0	0		0	225.063	0	0		0	41.6212	0	0
0			0		0			0		0			0		0			0		0			0		0			0		0			0		0			0		0			0		0			0
5.83702	262.666	2.22222	40.4265		0	37.0823	0	0		0	176.141	0	0		0	41.7176	0	0		0	230.219	0	0		0	41.7176	0	0		6.63688	292.023	2.27273	18.5619		0	123.608	0	0		0	225.584	0	0		0	41.7176	0	0
0			0		0			0		0			0		0			0		0			0		0			0		0			0		0			0		0			0		0			0
0	263.273	0	0		0	37.1679	0	0		0	176.548	0	0		0	41.8139	0	0		0	230.751	0	0		0	41.8139	0	0		0	292.697	0	0		3.44147	123.893	2.77778	25.1111		0	226.105	0	0		0	41.8139	0	0
0			0		0			0		0			0		0			0		0			0		0			0		0			0		0			0		0			0		0			0
0	263.879	0	0		0	37.2535	0	0		4.9154	176.954	2.77778	42.1669		1.16417	41.9102	2.77778	5.25221		0	231.282	0	0		0.230276	41.9102	0.549451	1.63507		3.33377	293.372	1.13636	10.1778		0	124.178	0	0		0	226.626	0	0		0.952505	41.9102	2.27273	6.36299
0			0		0			0		0			0		0			0		0			0		0			0		0			0		0			0		0			0		0			0
0	264.486	0	0		0	37.3392	0	0		0	177.361	0	0		0	42.0066	0	0		0	231.814	0	0		0	42.0066	0	0		0	294.046	0	0		0	124.464	0	0		0	227.147	0	0		0	42.0066	0	0
0			0		0			0		0			0		0			0		0			0		0			0		0			0		0			0		0			0		0			0
0	265.092	0	0		0	37.4248	0	0		0	177.768	0	0		0	42.1029	0	0		0	232.346	0	0		0	42.1029	0	0		0	294.721	0	0		0	124.749	0	0		0	227.668	0	0		0	42.1029	0	0
0			0		0			0		0			0		0			0		0			0		0			0		0			0		0			0		0			0		0			0
0	265.699	0	0		0	37.5105	0	0		0	178.175	0	0		0	42.1993	0	0		0	232.877	0	0		0	42.1993	0	0		6.71352	295.395	2.27273	23.2008		0	125.035	0	0		0	228.189	0	0		0	42.1993	0	0
0			0		0			0		0			0		0			0		0			0		0			0		0			0		0			0		0			0		0			0
0	266.306	0	0		0	37.5961	0	0		0	178.582	0	0		0	42.2956	0	0		11.1147	233.409	4.7619	30.8306		0	42.2956	0	0		0	296.069	0	0		0	125.32	0	0		0	228.71	0	0		0	42.2956	0	0
0			0		0			0		0			0		0			0		0			0		0			0		0			0		0			0		0			0		0			0
0	266.912	0	0		0	37.6818	0	0		0	178.988	0	0		0	42.392	0	0		0	233.941	0	0		0	42.392	0	0		0	296.744	0	0		0	125.606	0	0		0	229.231	0	0		0	42.392	0	0
0			0		0			0		0			0		0			0		0			0		0			0		0			0		0			0		0			0		0			0
0	267.519	0	0		0	37.7674	0	0		0	179.395	0	0		0	42.4883	0	0		0	234.472	0	0		0	42.4883	0	0		0	297.418	0	0		2.33132	125.891	1.85185	19.04		0	229.752	0	0		0	42.4883	0	0
0			0		0			0		0			0		0			0		0			0		0			0		0			0		0			0		0			0		0			0
11.9167	268.126	4.44444	102.877		0	37.853	0	0		0	179.802	0	0		0	42.5847	0	0		5.59534	235.004	2.38095	17.4085		0	42.5847	0	0		0	298.093	0	0		0	126.177	0	0		0	230.273	0	0		0	42.5847	0	0
0			0		0			0		0			0		0			0		0			0		0			0		0			0		0			0		0			0		0			0
0	268.732	0	0		0	37.9387	0	0		0	180.209	0	0		0	42.681	0	0		0	235.536	0	0		0	42.681	0	0		6.79016	298.767	2.27273	28.3565		0	126.462	0	0		0	230.794	0	0		0	42.681	0	0
0			0		0			0		0			0		0			0		0			0		0			0		0			0		0			0		0			0		0			0
0	269.339	0	0		0	38.0243	0	0		0	180.615	0	0		0	42.7773	0	0		0	236.068	0	0		0	42.7773	0	0		0	299.441	0	0		0	126.748	0	0		0	231.315	0	0		0	42.7773	0	0
0			0		0			0		0			0		0			0		0			0		0			0		0			0		0			0		0			0		0			0
0	269.945	0	0		0	38.1099	0	0		0	181.022	0	0		0	42.8737	0	0		0	236.599	0	0		0	42.8737	0	0		0	300.116	0	0		0	127.033	0	0		0	231.835	0	0		0	42.8737	0	0
0			0		0			0		0			0		0			0		0			0		0			0		0			0		0			0		0			0		0			0
0	270.552	0	0		0	38.1956	0	0		0	181.429	0	0		0	42.97	0	0		0	237.131	0	0		0	42.97	0	0		3.41807	300.79	1.13636	15.849		0	127.319	0	0		0	232.357	0	0		0	42.97	0	0
0			0		0			0		0			0		0			0		0			0		0			0		0			0		0			0		0			0		0			0
0	271.159	0	0		0.386679	38.2812	1.0101	2.19555		0	181.836	0	0		0	43.0664	0	0		0	237.663	0	0		0	43.0664	0	0		0	301.465	0	0		7.08912	127.604	5.55556	63.3852		0	232.877	0	0		0	43.0664	0	0
0			0		0			0		0			0		0			0		0			0		0			0		0			0		0			0		0			0		0			0
12.0785	271.765	4.44444	119.031		0	38.3669	0	0		0	182.243	0	0		0	43.1627	0	0		0	238.194	0	0		0	43.1627	0	0		0	302.139	0	0		0	127.89	0	0		0	233.399	0	0		0	43.1627	0	0
0			0		0			0		0			0		0			0		0			0		0			0		0			0		0			0		0			0		0			0
0	272.372	0	0		0	38.4525	0	0		0	182.649	0	0		0	43.2591	0	0		17.0519	238.726	7.14286	67.5916		0	43.2591	0	0		0	302.813	0	0		0	128.175	0	0		0	233.919	0	0		0	43.2591	0	0
0			0		0			0		0			0		0			0		0			0		0			0		0			0		0			0		0			0		0			0
0	272.979	0	0		0	38.5382	0	0		0	183.056	0	0		0	43.3554	0	0		0	239.258	0	0		0	43.3554	0	0		0	303.488	0	0		0	128.46	0	0		0	234.44	0	0		0	43.3554	0	0
0			0		0			0		0			0		0			0		0			0		0			0		0			0		0			0		0			0		0			0
0	273.585	0	0		0	38.6238	0	0		0	183.463	0	0		0	43.4518	0	0		0	239.789	0	0		0	43.4518	0	0		0	304.162	0	0		0	128.746	0	0		0	234.961	0	0		0	43.4518	0	0
0			0		0			0		0			0		0			0		0			0		0			0		0			0		0			0		0			0		0			0
0	274.192	0	0		0	38.7094	0	0		0	183.87	0	0		0	43.5481	0	0		0	240.321	0	0		0	43.5481	0	0		6.92811	304.837	2.27273	38.9393		0	129.031	0	0		0	235.482	0	0		0	43.5481	0	0
0			0		0			0		0			0		0			0		0			0		0			0		0			0		0			0		0			0		0			0
0	274.798	0	0		0	38.7951	0	0		5.11879	184.277	2.77778	59.5054		0	43.6445	0	0		0	240.853	0	0		0	43.6445	0	0		0	305.511	0	0		0	129.317	0	0		0	236.003	0	0		0	43.6445	0	0
0			0		0			0		0			0		0			0		0			0		0			0		0			0		0			0		0			0		0			0
6.12011	275.405	2.22222	68.1817		0	38.8807	0	0		0	184.683	0	0		3.64507	43.7408	8.33333	20.2311		0	241.384	0	0		0	43.7408	0	0		6.95876	306.186	2.27273	41.5184		1.20002	129.602	0.925926	11.8511		0	236.524	0	0		1.49116	43.7408	3.40909	11.7471
0			0		0			0		0			0		0			0		0			0		0			0		0			0		0			0		0			0		0			0
0	276.012	0	0		0	38.9664	0	0		0	185.09	0	0		0	43.8372	0	0		0	241.916	0	0		0	43.8372	0	0		0	306.86	0	0		0	129.888	0	0		0	237.045	0	0		0	43.8372	0	0
0			0		0			0		0			0		0			0		0			0		0			0		0			0		0			0		0			0		0			0
0	276.618	0	0		0	39.052	0	0		0	185.497	0	0		0	43.9335	0	0		5.77257	242.448	2.38095	28.3122		0	43.9335	0	0		0	307.534	0	0		0	130.173	0	0		0	237.566	0	0		0	43.9335	0	0
0			0		0			0		0			0		0			0		0			0		0			0		0			0		0			0		0			0		0			0
6.16055	277.225	2.22222	72.7353		0	39.1376	0	0		0	185.904	0	0		0	44.0298	0	0		0	242.98	0	0		0	44.0298	0	0		3.50237	308.209	1.13636	22.771		0	130.459	0	0		0	238.087	0	0		0	44.0298	0	0
0			0		0			0		0			0		0			0		0			0		0			0		0			0		0			0		0			0		0			0
0	277.832	0	0		0	39.2233	0	0		0	186.311	0	0		0	44.1262	0	0		0	243.511	0	0		0	44.1262	0	0		0	308.883	0	0		0	130.744	0	0		0	238.608	0	0		0	44.1262	0	0
0			0		0			0		0			0		0			0		0			0		0			0		0			0		0			0		0			0		0			0
0	278.438	0	0		0	39.3089	0	0		0	186.717	0	0		0	44.2225	0	0		0	244.043	0	0		0	44.2225	0	0		0	309.558	0	0		0	131.03	0	0		0	239.129	0	0		0	44.2225	0	0
0			0		0			0		0			0		0			0		0			0		0			0		0			0		0			0		0			0		0			0
6.20099	279.045	2.22222	77.4364		0	39.3946	0	0		0	187.124	0	0		0	44.3189	0	0		5.8232	244.575	2.38095	31.9121		0	44.3189	0	0		3.52537	310.232	1.13636	24.876		1.21588	131.315	0.925926	13.0131		0	239.65	0	0		0	44.3189	0	0
0			0		0			0		0			0		0			0		0			0		0			0		0			0		0			0		0			0		0			0
0	279.651	0	0		0	39.4802	0	0		0	187.531	0	0		0	44.4152	0	0		0	245.106	0	0		0	44.4152	0	0		0	310.906	0	0		0	131.601	0	0		0	240.171	0	0		0	44.4152	0	0
0			0		0			0		0			0		0			0		0			0		0			0		0			0		0			0		0			0		0			0
0	280.258	0	0		0	39.5658	0	0		5.22049	187.938	2.77778	69.2916		0	44.5116	0	0		0	245.638	0	0		0	44.5116	0	0		3.54069	311.581	1.13636	26.331		0	131.886	0	0		0	240.692	0	0		0	44.5116	0	0
0			0		0			0		0			0		0			0		0			0		0			0		0			0		0			0		0			0		0			0
6.24143	280.865	2.22222	82.2844		0	39.6515	0	0		0	188.345	0	0		0	44.6079	0	0		0	246.17	0	0		0	44.6079	0	0		0	312.255	0	0		0	132.172	0	0		0	241.213	0	0		0	44.6079	0	0
0			0		0			0		0			0		0			0		0			0		0			0		0			0		0			0		0			0		0			0
0	281.471	0	0		0	39.7371	0	0		0	188.751	0	0		0	44.7043	0	0		0	246.701	0	0		0	44.7043	0	0		0	312.93	0	0		0	132.457	0	0		0	241.734	0	0		0	44.7043	0	0
0			0		0			0		0			0		0			0		0			0		0			0		0			0		0			0		0			0		0			0
0	282.078	0	0		0	39.8228	0	0		0	189.158	0	0		0	44.8006	0	0		0	247.233	0	0		0	44.8006	0	0		0	313.604	0	0		0	132.743	0	0		0	242.255	0	0		0	44.8006	0	0
0			0		0			0		0			0		0			0		0			0		0			0		0			0		0			0		0			0		0			0
0	282.685	0	0		0	39.9084	0	0		0	189.565	0	0		0	44.8969	0	0		0	247.765	0	0		0	44.8969	0	0		0	314.279	0	0		0	133.028	0	0		0	242.776	0	0		0	44.8969	0	0
0			0		0			0		0			0		0			0		0			0		0			0		0			0		0			0		0			0		0			0
0	283.291	0	0		0	39.994	0	0		0	189.972	0	0		0	44.9933	0	0		0	248.296	0	0		0	44.9933	0	0		0	314.953	0	0		0	133.314	0	0		0	243.297	0	0		0	44.9933	0	0
0			0		0			0		0			0		0			0		0			0		0			0		0			0		0			0		0			0		0			0
0	283.898	0	0		0	40.0797	0	0		0	190.379	0	0		0	45.0896	0	0		0	248.828	0	0		0	45.0896	0	0		3.58668	315.627	1.13636	30.9439		0	133.599	0	0		0	243.818	0	0		0	45.0896	0	0
0			0		0			0		0			0		0			0		0			0		0			0		0			0		0			0		0			0		0			0
0	284.504	0	0		0	40.1653	0	0		0	190.785	0	0		0	45.186	0	0		0	249.36	0	0		0	45.186	0	0		0	316.302	0	0		0	133.884	0	0		0	244.339	0	0		0	45.186	0	0
0			0		0			0		0			0		0			0		0			0		0			0		0			0		0			0		0			0		0			0
0	285.111	0	0		0	40.251	0	0		0	191.192	0	0		0	45.2823	0	0		0	249.891	0	0		0	45.2823	0	0		0	316.976	0	0		0	134.17	0	0		0	244.86	0	0		0	45.2823	0	0
0			0		0			0		0			0		0			0		0			0		0			0		0			0		0			0		0			0		0			0
0	285.718	0	0		0	40.3366	0	0		0	191.599	0	0		0	45.3787	0	0		0	250.423	0	0		0	45.3787	0	0		0	317.651	0	0		0	134.455	0	0		0	245.381	0	0		0	45.3787	0	0
0			0		0			0		0			0		0			0		0			0		0			0		0			0		0			0		0			0		0			0
0	286.324	0	0		0	40.4222	0	0		0	192.006	0	0		0	45.475	0	0		0	250.955	0	0		0	45.475	0	0		0	318.325	0	0		0	134.741	0	0		0	245.902	0	0		0	45.475	0	0
0			0		0			0		0			0		0			0		0			0		0			0		0			0		0			0		0			0		0			0
0	286.931	0	0		0	40.5079	0	0		0	192.412	0	0		0	45.5714	0	0		0	251.486	0	0		0	45.5714	0	0		3.625	319	1.13636	35.0725		2.50049	135.026	1.85185	31.4339		0	246.423	0	0		1.03571	45.5714	2.27273	9.45212
0			0		0			0		0			0		0			0		0			0		0			0		0			0		0			0		0			0		0			0
0	287.537	0	0		0	40.5935	0	0		0	192.819	0	0		0	45.6677	0	0		0	252.018	0	0		0	45.6677	0	0		0	319.674	0	0		0	135.312	0	0		0	246.944	0	0		0	45.6677	0	0
0			0		0			0		0			0		0			0		0			0		0			0		0			0		0			0		0			0		0			0
0	288.144	0	0		0	40.6792	0	0		0	193.226	0	0		0	45.764	0	0		0	252.55	0	0		0	45.764	0	0		0	320.348	0	0		0	135.597	0	0		0	247.465	0	0		0	45.764	0	0
0			0		0			0		0			0		0			0		0			0		0			0		0			0		0			0		0			0		0			0
0	288.751	0	0		0	40.7648	0	0		0	193.633	0	0		0	45.8604	0	0		0	253.082	0	0		0	45.8604	0	0		0	321.023	0	0		0	135.883	0	0		0	247.986	0	0		0	45.8604	0	0
0			0		0			0		0			0		0			0		0			0		0			0		0			0		0			0		0			0		0			0
0	289.357	0	0		0	40.8504	0	0		0	194.04	0	0		0	45.9567	0	0		0	253.613	0	0		0	45.9567	0	0		0	321.697	0	0		0	136.168	0	0		0	248.507	0	0		0	45.9567	0	0
0			0		0			0		0			0		0			0		0			0		0			0		0			0		0			0		0			0		0			0
0	289.964	0	0		0	40.9361	0	0		0	194.446	0	0		0	46.0531	0	0		0	254.145	0	0		0	46.0531	0	0		0	322.372	0	0		0	136.454	0	0		0	249.028	0	0		0	46.0531	0	0
0			0		0			0		0			0		0			0		0			0		0			0		0			0		0			0		0			0		0			0
0	290.57	0	0		0	41.0217	0	0		0	194.853	0	0		0	46.1494	0	0		0	254.677	0	0		0	46.1494	0	0		3.67098	323.046	1.13636	40.3677		0	136.739	0	0		0	249.549	0	0		0	46.1494	0	0
0			0		0			0		0			0		0			0		0			0		0			0		0			0		0			0		0			0		0			0
0	291.177	0	0		0	41.1074	0	0		0	195.26	0	0		0	46.2458	0	0		0	255.208	0	0		0	46.2458	0	0		0	323.721	0	0		0	137.024	0	0		0	250.07	0	0		0	46.2458	0	0
0			0		0			0		0			0		0			0		0			0		0			0		0			0		0			0		0			0		0			0
0	291.784	0	0		0	41.193	0	0		0	195.667	0	0		0	46.3421	0	0		0	255.74	0	0		0	46.3421	0	0		0	324.395	0	0		0	137.31	0	0		0	250.591	0	0		0	46.3421	0	0
0			0		0			0		0			0		0			0		0			0		0			0		0			0		0			0		0			0		0			0
0	292.39	0	0		0	41.2786	0	0		0	196.074	0	0		0	46.4385	0	0		0	256.272	0	0		0	46.4385	0	0		0	325.069	0	0		0	137.595	0	0		0	251.112	0	0		0	46.4385	0	0
0			0		0			0		0			0		0			0		0			0		0			0		0			0		0			0		0			0		0			0
0	292.997	0	0		0	41.3643	0	0		0	196.48	0	0		0	46.5348	0	0		0	256.803	0	0		0	46.5348	0	0		0	325.744	0	0		0	137.881	0	0		0	251.633	0	0		0	46.5348	0	0
0			0		0			0		0			0		0			0		0			0		0			0		0			0		0			0		0			0		0			0
0	293.604	0	0		0	41.4499	0	0		0	196.887	0	0		0	46.6312	0	0		0	257.335	0	0		0	46.6312	0	0		3.7093	326.418	1.13636	45.0648		0	138.166	0	0		0	252.154	0	0		0	46.6312	0	0
0			0		0			0		0			0		0			0		0			0		0			0		0			0		0			0		0			0		0			0
0	294.21	0	0		0	41.5356	0	0		0	197.294	0	0		0	46.7275	0	0		0	257.867	0	0		0	46.7275	0	0		0	327.093	0	0		1.28196	138.452	0.925926	18.4392		0	252.675	0	0		0	46.7275	0	0
0			0		0			0		0			0		0			0		0			0		0			0		0			0		0			0		0			0		0			0
0	294.817	0	0		0	41.6212	0	0		0	197.701	0	0		0	46.8239	0	0		0	258.398	0	0		0	46.8239	0	0		0	327.767	0	0		0	138.737	0	0		0	253.196	0	0		0	46.8239	0	0
0			0		0			0		0			0		0			0		0			0		0			0		0			0		0			0		0			0		0			0
6.56497	295.423	2.22222	126.369		0	41.7068	0	0		0	198.107	0	0		0	46.9202	0	0		6.165	258.93	2.38095	61.8453		0	46.9202	0	0		0	328.441	0	0		0	139.023	0	0		0	253.717	0	0		0	46.9202	0	0
0			0		0			0		0			0		0			0		0			0		0			0		0			0		0			0		0			0		0			0
0	296.03	0	0		0	41.7925	0	0		0	198.514	0	0		0	47.0166	0	0		0	259.462	0	0		0	47.0166	0	0		0	329.116	0	0		0	139.308	0	0		0	254.238	0	0		0	47.0166	0	0
0			0		0			0		0			0		0			0		0			0		0			0		0			0		0			0		0			0		0			0
0	296.637	0	0		0	41.8781	0	0		0	198.921	0	0		0	47.1129	0	0		0	259.993	0	0		0	47.1129	0	0		0	329.79	0	0		0	139.594	0	0		0	254.759	0	0		0	47.1129	0	0
0			0		0			0		0			0		0			0		0			0		0			0		0			0		0			0		0			0		0			0
0	297.243	0	0		0.847753	41.9638	2.0202	6.85868		0	199.328	0	0		0	47.2092	0	0		12.406	260.525	4.7619	131.554		0	47.2092	0	0		0	330.465	0	0		0	139.879	0	0		0	255.28	0	0		0	47.2092	0	0
0			0		0			0		0			0		0			0		0			0		0			0		0			0		0			0		0			0		0			0
0	297.85	0	0		0	42.0494	0	0		0	199.735	0	0		0	47.3056	0	0		0	261.057	0	0		0	47.3056	0	0		0	331.139	0	0		0	140.165	0	0		0	255.8	0	0		0	47.3056	0	0
0			0		0			0		0			0		0			0		0			0		0			0		0			0		0			0		0			0		0			0
0	298.457	0	0		0	42.135	0	0		0	200.142	0	0		1.31672	47.4019	2.77778	10.2852		0	261.588	0	0		0.5209	47.4019	1.0989	5.68364		3.77061	331.813	1.13636	53.1174		0	140.45	0	0		0	256.322	0	0		0	47.4019	0	0
0			0		0			0		0			0		0			0		0			0		0			0		0			0		0			0		0			0		0			0
0	299.063	0	0		0	42.2207	0	0		0	200.548	0	0		0	47.4983	0	0		0	262.12	0	0		0	47.4983	0	0		0	332.488	0	0		0	140.736	0	0		0	256.842	0	0		0	47.4983	0	0
0			0		0			0		0			0		0			0		0			0		0			0		0			0		0			0		0			0		0			0
0	299.67	0	0		0	42.3063	0	0		0	200.955	0	0		0	47.5946	0	0		12.5072	262.652	4.7619	142.415		0	47.5946	0	0		0	333.162	0	0		0	141.021	0	0		0	257.363	0	0		0	47.5946	0	0
0			0		0			0		0			0		0			0		0			0		0			0		0			0		0			0		0			0		0			0
0	300.276	0	0		0	42.392	0	0		0	201.362	0	0		0	47.691	0	0		0	263.183	0	0		0	47.691	0	0		0	333.837	0	0		0	141.307	0	0		0	257.885	0	0		0	47.691	0	0
0			0		0			0		0			0		0			0		0			0		0			0		0			0		0			0		0			0		0			0
0	300.883	0	0		0	42.4776	0	0		0	201.769	0	0		0	47.7873	0	0		0	263.715	0	0		0	47.7873	0	0		0	334.511	0	0		0	141.592	0	0		0	258.406	0	0		0	47.7873	0	0
0			0		0			0		0			0		0			0		0			0		0			0		0			0		0			0		0			0		0			0
0	301.49	0	0		0	42.5632	0	0		0	202.175	0	0		0	47.8837	0	0		0	264.247	0	0		0	47.8837	0	0		0	335.186	0	0		0	141.877	0	0		0	258.926	0	0		0	47.8837	0	0
0			0		0			0		0			0		0			0		0			0		0			0		0			0		0			0		0			0		0			0
0	302.096	0	0		0	42.6489	0	0		0	202.582	0	0		0	47.98	0	0		0	264.779	0	0		0	47.98	0	0		0	335.86	0	0		0	142.163	0	0		0	259.447	0	0		0	47.98	0	0
0			0		0			0		0			0		0			0		0			0		0			0		0			0		0			0		0			0		0			0
0	302.703	0	0		0	42.7345	0	0		0	202.989	0	0		0	48.0763	0	0		0	265.31	0	0		0	48.0763	0	0		0	336.534	0	0		0	142.448	0	0		0	259.968	0	0		0	48.0763	0	0
0			0		0			0		0			0		0			0		0			0		0			0		0			0		0			0		0			0		0			0
0	303.31	0	0		0	42.8202	0	0		0	203.396	0	0		0	48.1727	0	0		0	265.842	0	0		0	48.1727	0	0		0	337.209	0	0		0	142.734	0	0		0	260.489	0	0		0	48.1727	0	0
0			0		0			0		0			0		0			0		0			0		0			0		0			0		0			0		0			0		0			0
0	303.916	0	0		0	42.9058	0	0		0	203.803	0	0		0	48.269	0	0		6.34223	266.374	2.38095	81.2297		0	48.269	0	0		0	337.883	0	0		0	143.019	0	0		0	261.01	0	0		0	48.269	0	0
0			0		0			0		0			0		0			0		0			0		0			0		0			0		0			0		0			0		0			0
0	304.523	0	0		0	42.9915	0	0		0	204.209	0	0		0	48.3654	0	0		0	266.905	0	0		0	48.3654	0	0		0	338.558	0	0		0	143.305	0	0		0	261.531	0	0		0	48.3654	0	0
0			0		0			0		0			0		0			0		0			0		0			0		0			0		0			0		0			0		0			0
0	305.129	0	0		0	43.0771	0	0		0	204.616	0	0		0	48.4617	0	0		0	267.437	0	0		0	48.4617	0	0		0	339.232	0	0		0	143.59	0	0		0	262.052	0	0		0	48.4617	0	0
0			0		0			0		0			0		0			0		0			0		0			0		0			0		0			0		0			0		0			0
0	305.736	0	0		0	43.1627	0	0		0	205.023	0	0		0	48.5581	0	0		0	267.969	0	0		0	48.5581	0	0		0	339.906	0	0		0	143.876	0	0		0	262.573	0	0		0	48.5581	0	0
0			0		0			0		0			0		0			0		0			0		0			0		0			0		0			0		0			0		0			0
0	306.343	0	0		0	43.2484	0	0		0	205.43	0	0		0	48.6544	0	0		0	268.5	0	0		0	48.6544	0	0		0	340.581	0	0		0	144.161	0	0		0	263.094	0	0		0	48.6544	0	0
0			0		0			0		0			0		0			0		0			0		0			0		0			0		0			0		0			0		0			0
0	306.949	0	0		0	43.334	0	0		0	205.837	0	0		0	48.7508	0	0		0	269.032	0	0		0	48.7508	0	0		0	341.255	0	0		0	144.447	0	0		0	263.615	0	0		0	48.7508	0	0
0			0		0			0		0			0		0			0		0			0		0			0		0			0		0			0		0			0		0			0
0	307.556	0	0		0	43.4196	0	0		0	206.243	0	0		0	48.8471	0	0		0	269.564	0	0		0	48.8471	0	0		0	341.93	0	0		0	144.732	0	0		0	264.136	0	0		0	48.8471	0	0
0			0		0			0		0			0		0			0		0			0		0			0		0			0		0			0		0			0		0			0
0	308.163	0	0		0	43.5053	0	0		0	206.65	0	0		0	48.9434	0	0		0	270.095	0	0		0	48.9434	0	0		0	342.604	0	0		0	145.018	0	0		0	264.657	0	0		0	48.9434	0	0
0			0		0			0		0			0		0			0		0			0		0			0		0			0		0			0		0			0		0			0
0	308.769	0	0		0	43.5909	0	0		0	207.057	0	0		0	49.0398	0	0		0	270.627	0	0		0	49.0398	0	0		0	343.279	0	0		0	145.303	0	0		0	265.178	0	0		0	49.0398	0	0
0			0		0			0		0			0		0			0		0			0		0			0		0			0		0			0		0			0		0			0
0	309.376	0	0		0	43.6766	0	0		0	207.464	0	0		0	49.1361	0	0		0	271.159	0	0		0	49.1361	0	0		0	343.953	0	0		0	145.589	0	0		0	265.699	0	0		0	49.1361	0	0
0			0		0			0		0			0		0			0		0			0		0			0		0			0		0			0		0			0		0			0
6.88849	309.982	2.22222	179.873		0.884085	43.7622	2.0202	8.26291		5.77418	207.87	2.77778	135.636		1.36757	49.2325	2.77778	12.3352		6.46882	271.69	2.38095	96.6909		0.270508	49.2325	0.549451	3.31772		3.91622	344.627	1.13636	74.8941		1.35069	145.874	0.925926	25.0829		3.02523	266.22	1.13636	148.295		0.55946	49.2325	1.13636	6.57527
[truncated: 56 more columns]

## Sheet: raw data_T cell full AB EGTA
	2019-07-31 Tcell EGTA 500 cell1-1 lamellipodium					2019-07-31 Tcell EGTA 500 cell1-1 cell body					2019-08-28 T cell EGTA 500 cell 1-2 lamellipodium					2019-08-28 T cell EGTA 500 cell 1-2 cell body					2019-08-28 T cell EGTA 500 cell 2-1 lamellipodium					2019-08-28 T cell EGTA 500 cell 2-1 cell body					2019-09-05 T cell EGTA 500 cell1-1 lamellipodium					2019-09-05 T cell EGTA 500 cell1-1 cell body					2019-09-05 T cell EGTA 500 cell2-1 lamellipodium					2019-09-05 T cell EGTA 500 cell2-1 cell body
	Average	61.4761				Average	22.1843				Average	94.6475				Average	36.7102				Average	97.3359				Average	66.9842				Average	85.0262				Average	49.699				Average	115.998				Average	62.2337
	StDev	17.7094				StDev	9.14357				StDev	47.698				StDev	13.5617				StDev	34.3855				StDev	23.4515				StDev	28.1894				StDev	16.9708				StDev	37.9849				StDev	17.7769
			setp					setp					setp					setp					setp					setp					setp					setp					setp					setp
	kPa	%				kPa	%				kPa	%				kPa	%				kPa	%				kPa	%				kPa	%				kPa	%				kPa	%				kPa	%
0			0		0			0		0			0		0			0		0			0		0			0		0			0		0			0		0			0		0			0
0	0	2.38095	89.9835		0	0	1.11111	5.46824		0	0	2.38095	213.289		0	0	0.510204	6.87571		0	0	0.591716	56.0608		0	0	0.595238	26.7077		0	0	0.694445	50.2045		0	0	0.263158	6.49997		0	0	0.714286	96.1104		0	0	0.324675	12.5748
0			0		0			0		0			0		0			0		0			0		0			0		0			0		0			0		0			0		0			0
0	0.174849	0	0		0	0.0785036	0	0		0	0.354138	0	0		0	0.150836	0	0		0	0.321347	0	0		0	0.229534	0	0		0	0.334429	0	0		0	0.197074	0	0		0	0.40012	0	0		0	0.209018	0	0
0			0		0			0		0			0		0			0		0			0		0			0		0			0		0			0		0			0		0			0
0	0.349698	0	0		0	0.157007	0	0		0	0.708275	0	0		0	0.301673	0	0		0	0.642694	0	0		0	0.459067	0	0		0	0.668857	0	0		0	0.394148	0	0		0	0.80024	0	0		0	0.418036	0	0
0			0		0			0		0			0		0			0		0			0		0			0		0			0		0			0		0			0		0			0
0	0.524547	0	0		0	0.235511	0	0		0	1.06241	0	0		0	0.452509	0	0		0	0.964042	0	0		0	0.688601	0	0		0	1.00329	0	0		0	0.591222	0	0		0	1.20036	0	0		0	0.627054	0	0
0			0		0			0		0			0		0			0		0			0		0			0		0			0		0			0		0			0		0			0
0	0.699396	0	0		0	0.314015	0	0		0	1.41655	0	0		0	0.603346	0	0		0	1.28539	0	0		0	0.918135	0	0		0	1.33771	0	0		0	0.788296	0	0		0	1.60048	0	0		0	0.836072	0	0
0			0		0			0		0			0		0			0		0			0		0			0		0			0		0			0		0			0		0			0
0	0.874245	0	0		0	0.392518	0	0		0	1.77069	0	0		0	0.754182	0	0		0	1.60674	0	0		0	1.14767	0	0		0	1.67214	0	0		0	0.985371	0	0		0	2.0006	0	0		0	1.04509	0	0
0			0		0			0		0			0		0			0		0			0		0			0		0			0		0			0		0			0		0			0
0	1.04909	0	0		0	0.471022	0	0		0	2.12483	0	0		0	0.905019	0	0		0	1.92808	0	0		0	1.3772	0	0		0	2.00657	0	0		0	1.18244	0	0		0	2.40072	0	0		0	1.25411	0	0
0			0		0			0		0			0		0			0		0			0		0			0		0			0		0			0		0			0		0			0
0	1.22394	0	0		0	0.549526	0	0		0	2.47896	0	0		0	1.05585	0	0		0	2.24943	0	0		0	1.60674	0	0		0	2.341	0	0		0	1.37952	0	0		0	2.80084	0	0		0	1.46313	0	0
0			0		0			0		0			0		0			0		0			0		0			0		0			0		0			0		0			0		0			0
0	1.39879	0	0		0	0.628029	0	0		0	2.8331	0	0		0	1.20669	0	0		0	2.57078	0	0		0	1.83627	0	0		0	2.67543	0	0		0	1.57659	0	0		0.022864	3.20096	0.714286	90.8793		0	1.67214	0	0
0			0		0			0		0			0		0			0		0			0		0			0		0			0		0			0		0			0		0			0
0	1.57364	0	0		0	0.706533	0	0		0	3.18724	0	0		0	1.35753	0	0		0	2.89213	0	0		0	2.0658	0	0		0.0418036	3.00986	1.38889	93.4261		0	1.77367	0	0		0	3.60108	0	0		0	1.88116	0	0
0			0		0			0		0			0		0			0		0			0		0			0		0			0		0			0		0			0		0			0
0	1.74849	0	0		0	0.785036	0	0		0	3.54138	0	0		0	1.50836	0	0		0.0380293	3.21347	1.18343	104.841		0	2.29534	0	0		0	3.34429	0	0		0	1.97074	0	0		0	4.0012	0	0		0	2.09018	0	0
0			0		0			0		0			0		0			0		0			0		0			0		0			0		0			0		0			0		0			0
0	1.92334	0	0		0	0.86354	0	0		0	3.89552	0	0		0	1.6592	0	0		0	3.53482	0	0		0	2.52487	0	0		0	3.67872	0	0		0	2.16782	0	0		0	4.40132	0	0		0	2.2992	0	0
0			0		0			0		0			0		0			0		0			0		0			0		0			0		0			0		0			0		0			0
0	2.09819	0	0		0	0.942044	0	0		0	4.24965	0	0		0	1.81004	0	0		0	3.85617	0	0		0	2.75441	0	0		0	4.01315	0	0		0	2.36489	0	0		0	4.80144	0	0		0	2.50822	0	0
0			0		0			0		0			0		0			0		0			0		0			0		0			0		0			0		0			0		0			0
0	2.27304	0	0		0	1.02055	0	0		0	4.60379	0	0		0	1.96087	0	0		0	4.17751	0	0		0	2.98394	0	0		0	4.34757	0	0		0	2.56196	0	0		0	5.20156	0	0		0	2.71723	0	0
0			0		0			0		0			0		0			0		0			0		0			0		0			0		0			0		0			0		0			0
0	2.44789	0	0		0	1.09905	0	0		0	4.95793	0	0		0	2.11171	0	0		0	4.49886	0	0		0	3.21347	0	0		0	4.682	0	0		0	2.75904	0	0		0	5.60168	0	0		0	2.92625	0	0
0			0		0			0		0			0		0			0		0			0		0			0		0			0		0			0		0			0		0			0
0	2.62274	0	0		0	1.17755	0	0		0	5.31207	0	0		0	2.26255	0	0		0	4.82021	0	0		0.0614822	3.44301	1.78571	72.098		0	5.01643	0	0		0	2.95611	0	0		0	6.0018	0	0		0	3.13527	0	0
0			0		0			0		0			0		0			0		0			0		0			0		0			0		0			0		0			0		0			0
0	2.79758	0	0		0	1.25606	0	0		0	5.6662	0	0		0	2.41338	0	0		0	5.14156	0	0		0	3.67254	0	0		0	5.35086	0	0		0	3.15319	0	0		0	6.40192	0	0		0	3.34429	0	0
0			0		0			0		0			0		0			0		0			0		0			0		0			0		0			0		0			0		0			0
0	2.97243	0	0		0	1.33456	0	0		0	6.02034	0	0		0	2.56422	0	0		0	5.4629	0	0		0	3.90207	0	0		0	5.68529	0	0		0	3.35026	0	0		0	6.80204	0	0		0	3.55331	0	0
0			0		0			0		0			0		0			0		0			0		0			0		0			0		0			0		0			0		0			0
0	3.14728	0	0		0	1.41307	0	0		0	6.37448	0	0		0	2.71506	0	0		0	5.78425	0	0		0	4.13161	0	0		0	6.01972	0	0		0	3.54733	0	0		0	7.20216	0	0		0	3.76232	0	0
0			0		0			0		0			0		0			0		0			0		0			0		0			0		0			0		0			0		0			0
0	3.32213	0	0		0	1.49157	0	0		0	6.72862	0	0		0	2.86589	0	0		0	6.1056	0	0		0	4.36114	0	0		0	6.35415	0	0		0	3.74441	0	0		0	7.60228	0	0		0	3.97134	0	0
0			0		0			0		0			0		0			0		0			0		0			0		0			0		0			0		0			0		0			0
0	3.49698	0	0		0	1.57007	0	0		0	7.08275	0	0		0	3.01673	0	0		0	6.42694	0	0		0	4.59067	0	0		0	6.68858	0	0		0	3.94148	0	0		0	8.0024	0	0		0	4.18036	0	0
0			0		0			0		0			0		0			0		0			0		0			0		0			0		0			0		0			0		0			0
0	3.67183	0	0		0	1.64858	0	0		0	7.43689	0	0		0	3.16757	0	0		0	6.74829	0	0		0	4.82021	0	0		0	7.023	0	0		0	4.13856	0	0		0	8.40252	0	0		0	4.38938	0	0
0			0		0			0		0			0		0			0		0			0		0			0		0			0		0			0		0			0		0			0
0	3.84668	0	0		0	1.72708	0	0		0	7.79103	0	0		0.0169306	3.3184	0.510204	5.68884		0	7.06964	0	0		0	5.04974	0	0		0	7.35743	0	0		0	4.33563	0	0		0	8.80264	0	0		0	4.5984	0	0
0			0		0			0		0			0		0			0		0			0		0			0		0			0		0			0		0			0		0			0
0	4.02153	0	0		0.020062	1.80558	1.11111	4.61434		0	8.14517	0	0		0	3.46924	0	0		0	7.39098	0	0		0	5.27928	0	0		0	7.69186	0	0		0	4.5327	0	0		0	9.20276	0	0		0	4.80741	0	0
0			0		0			0		0			0		0			0		0			0		0			0		0			0		0			0		0			0		0			0
0	4.19638	0	0		0	1.88409	0	0		0	8.4993	0	0		0	3.62007	0	0		0	7.71233	0	0		0	5.50881	0	0		0	8.02629	0	0		0	4.72978	0	0		0	9.60288	0	0		0	5.01643	0	0
0			0		0			0		0			0		0			0		0			0		0			0		0			0		0			0		0			0		0			0
0	4.37123	0	0		0	1.96259	0	0		0	8.85344	0	0		0	3.77091	0	0		0	8.03368	0	0		0	5.73834	0	0		0	8.36072	0	0		0	4.92685	0	0		0	10.003	0	0		0	5.22545	0	0
0			0		0			0		0			0		0			0		0			0		0			0		0			0		0			0		0			0		0			0
0	4.54608	0	0		0	2.04109	0	0		0	9.20758	0	0		0	3.92175	0	0		0	8.35503	0	0		0	5.96788	0	0		0	8.69515	0	0		0	5.12393	0	0		0	10.4031	0	0		0	5.43447	0	0
0			0		0			0		0			0		0			0		0			0		0			0		0			0		0			0		0			0		0			0
0	4.72092	0	0		0	2.1196	0	0		0	9.56172	0	0		0	4.07258	0	0		0	8.67637	0	0		0	6.19741	0	0		0.0627054	9.02958	0.694445	40.1075		0	5.321	0	0		0	10.8032	0	0		0	5.64349	0	0
0			0		0			0		0			0		0			0		0			0		0			0		0			0		0			0		0			0		0			0
0	4.89577	0	0		0	2.1981	0	0		0.236092	9.91586	2.38095	170.939		0	4.22342	0	0		0	8.99772	0	0		0	6.42694	0	0		0	9.36401	0	0		0	5.51807	0	0		0	11.2034	0	0		0	5.8525	0	0
0			0		0			0		0			0		0			0		0			0		0			0		0			0		0			0		0			0		0			0
0	5.07062	0	0		0	2.27661	0	0		0	10.27	0	0		0	4.37426	0	0		0	9.31907	0	0		0.0396219	6.65648	0.595238	21.6633		0	9.69843	0	0		0	5.71515	0	0		0	11.6035	0	0		0	6.06152	0	0
0			0		0			0		0			0		0			0		0			0		0			0		0			0		0			0		0			0		0			0
0	5.24547	0	0		0	2.35511	0	0		0	10.6241	0	0		0	4.52509	0	0		0	9.64042	0	0		0	6.88601	0	0		0	10.0329	0	0		0	5.91222	0	0		0	12.0036	0	0		0	6.27054	0	0
0			0		0			0		0			0		0			0		0			0		0			0		0			0		0			0		0			0		0			0
0	5.42032	0	0		0	2.43361	0	0		0	10.9783	0	0		0	4.67593	0	0		0	9.96176	0	0		0	7.11555	0	0		0	10.3673	0	0		0.0482313	6.1093	0.789474	15.0005		0	12.4037	0	0		0	6.47956	0	0
0			0		0			0		0			0		0			0		0			0		0			0		0			0		0			0		0			0		0			0
0	5.59517	0	0		0	2.51212	0	0		0	11.3324	0	0		0	4.82677	0	0		0	10.2831	0	0		0	7.34508	0	0		0	10.7017	0	0		0	6.30637	0	0		0	12.8038	0	0		0	6.68858	0	0
0			0		0			0		0			0		0			0		0			0		0			0		0			0		0			0		0			0		0			0
0	5.77002	0	0		0	2.59062	0	0		0	11.6865	0	0		0	4.9776	0	0		0	10.6045	0	0		0	7.57461	0	0		0	11.0361	0	0		0	6.50345	0	0		0	13.204	0	0		0	6.89759	0	0
0			0		0			0		0			0		0			0		0			0		0			0		0			0		0			0		0			0		0			0
0	5.94487	0	0		0	2.66912	0	0		0	12.0407	0	0		0	5.12844	0	0		0	10.9258	0	0		0	7.80415	0	0		0	11.3706	0	0		0	6.70052	0	0		0	13.6041	0	0		0	7.10661	0	0
0			0		0			0		0			0		0			0		0			0		0			0		0			0		0			0		0			0		0			0
0	6.11972	0	0		0	2.74763	0	0		0	12.3948	0	0		0	5.27928	0	0		0	11.2471	0	0		0	8.03368	0	0		0	11.705	0	0		0	6.89759	0	0		0	14.0042	0	0		0	7.31563	0	0
0			0		0			0		0			0		0			0		0			0		0			0		0			0		0			0		0			0		0			0
0	6.29457	0	0		0	2.82613	0	0		0	12.749	0	0		0	5.43011	0	0		0	11.5685	0	0		0	8.26321	0	0		0	12.0394	0	0		0	7.09467	0	0		0	14.4043	0	0		0	7.52465	0	0
0			0		0			0		0			0		0			0		0			0		0			0		0			0		0			0		0			0		0			0
0	6.46941	0	0		0	2.90463	0	0		0	13.1031	0	0		0	5.58095	0	0		0	11.8898	0	0		0	8.49275	0	0		0.171859	12.3739	1.38889	73.3106		0	7.29174	0	0		0	14.8044	0	0		0	7.73367	0	0
0			0		0			0		0			0		0			0		0			0		0			0		0			0		0			0		0			0		0			0
0	6.64426	0	0		0	2.98314	0	0		0.32041	13.4572	2.38095	156.949		0	5.73179	0	0		0	12.2112	0	0		0	8.72228	0	0		0	12.7083	0	0		0	7.48882	0	0		0	15.2046	0	0		0	7.94268	0	0
0			0		0			0		0			0		0			0		0			0		0			0		0			0		0			0		0			0		0			0
0	6.81911	0	0		0	3.06164	0	0		0	13.8114	0	0		0	5.88262	0	0		0	12.5325	0	0		0	8.95181	0	0		0	13.0427	0	0		0	7.68589	0	0		0	15.6047	0	0		0	8.1517	0	0
0			0		0			0		0			0		0			0		0			0		0			0		0			0		0			0		0			0		0			0
0	6.99396	0	0		0	3.14015	0	0		0	14.1655	0	0		0	6.03346	0	0		0	12.8539	0	0		0	9.18135	0	0		0	13.3772	0	0		0	7.88296	0	0		0	16.0048	0	0		0	8.36072	0	0
0			0		0			0		0			0		0			0		0			0		0			0		0			0		0			0		0			0		0			0
0	7.16881	0	0		0	3.21865	0	0		0	14.5197	0	0		0	6.18429	0	0		0	13.1752	0	0		0	9.41088	0	0		0	13.7116	0	0		0	8.08004	0	0		0	16.4049	0	0		0	8.56974	0	0
0			0		0			0		0			0		0			0		0			0		0			0		0			0		0			0		0			0		0			0
0	7.34366	0	0		0	3.29715	0	0		0	14.8738	0	0		0	6.33513	0	0		0	13.4966	0	0		0	9.64042	0	0		0	14.046	0	0		0	8.27711	0	0		0	16.805	0	0		0	8.77876	0	0
0			0		0			0		0			0		0			0		0			0		0			0		0			0		0			0		0			0		0			0
0	7.51851	0	0		0	3.37566	0	0		0	15.2279	0	0		0	6.48597	0	0		0	13.8179	0	0		0	9.86995	0	0		0	14.3804	0	0		0	8.47419	0	0		0	17.2052	0	0		0	8.98777	0	0
0			0		0			0		0			0		0			0		0			0		0			0		0			0		0			0		0			0		0			0
0	7.69336	0	0		0	3.45416	0	0		0	15.5821	0	0		0.0677225	6.6368	1.02041	9.22867		0	14.1393	0	0		0	10.0995	0	0		0	14.7149	0	0		0	8.67126	0	0		0	17.6053	0	0		0.0298597	9.19679	0.324675	9.13285
0			0		0			0		0			0		0			0		0			0		0			0		0			0		0			0		0			0		0			0
0	7.86821	0	0		0	3.53266	0	0		0	15.9362	0	0		0	6.78764	0	0		0	14.4606	0	0		0	10.329	0	0		0	15.0493	0	0		0	8.86834	0	0		0	18.0054	0	0		0	9.40581	0	0
0			0		0			0		0			0		0			0		0			0		0			0		0			0		0			0		0			0		0			0
0	8.04306	0	0		0	3.61117	0	0		0	16.2903	0	0		0	6.93848	0	0		0	14.782	0	0		0	10.5586	0	0		0	15.3837	0	0		0.0477127	9.06541	0.526316	8.68993		0	18.4055	0	0		0	9.61483	0	0
0			0		0			0		0			0		0			0		0			0		0			0		0			0		0			0		0			0		0			0
0	8.2179	0	0		0	3.68967	0	0		0	16.6445	0	0		0	7.08931	0	0		0	15.1033	0	0		0	10.7881	0	0		0	15.7181	0	0		0	9.26248	0	0		0	18.8056	0	0		0	9.82385	0	0
0			0		0			0		0			0		0			0		0			0		0			0		0			0		0			0		0			0		0			0
0	8.39275	0	0		0	3.76817	0	0		0	16.9986	0	0		0	7.24015	0	0		0	15.4247	0	0		0	11.0176	0	0		0	16.0526	0	0		0	9.45956	0	0		0	19.2058	0	0		0	10.0329	0	0
0			0		0			0		0			0		0			0		0			0		0			0		0			0		0			0		0			0		0			0
0	8.5676	0	0		0	3.84668	0	0		0	17.3528	0	0		0	7.39098	0	0		0	15.746	0	0		0	11.2471	0	0		0	16.387	0	0		0	9.65663	0	0		0	19.6059	0	0		0	10.2419	0	0
0			0		0			0		0			0		0			0		0			0		0			0		0			0		0			0		0			0		0			0
0	8.74245	0	0		0	3.92518	0	0		0	17.7069	0	0		0	7.54182	0	0		0	16.0674	0	0		0	11.4767	0	0		0	16.7214	0	0		0	9.85371	0	0		0	20.006	0	0		0	10.4509	0	0
0			0		0			0		0			0		0			0		0			0		0			0		0			0		0			0		0			0		0			0
0	8.9173	0	0		0	4.00369	0	0		0	18.061	0	0		0	7.69266	0	0		0	16.3887	0	0		0	11.7062	0	0		0	17.0559	0	0		0	10.0508	0	0		0	20.4061	0	0		0	10.6599	0	0
0			0		0			0		0			0		0			0		0			0		0			0		0			0		0			0		0			0		0			0
0	9.09215	0	0		0	4.08219	0	0		0	18.4152	0	0		0	7.84349	0	0		0	16.71	0	0		0	11.9358	0	0		0	17.3903	0	0		0	10.2478	0	0		0	20.8062	0	0		0	10.8689	0	0
0			0		0			0		0			0		0			0		0			0		0			0		0			0		0			0		0			0		0			0
0	9.267	0	0		0	4.16069	0	0		0	18.7693	0	0		0	7.99433	0	0		0	17.0314	0	0		0	12.1653	0	0		0	17.7247	0	0		0	10.4449	0	0		0	21.2064	0	0		0	11.0779	0	0
0			0		0			0		0			0		0			0		0			0		0			0		0			0		0			0		0			0		0			0
0	9.44185	0	0		0	4.2392	0	0		0	19.1234	0	0		0	8.14517	0	0		0	17.3528	0	0		0	12.3948	0	0		0	18.0591	0	0		0	10.642	0	0		0	21.6065	0	0		0	11.287	0	0
0			0		0			0		0			0		0			0		0			0		0			0		0			0		0			0		0			0		0			0
0	9.6167	0	0		0	4.3177	0	0		0	19.4776	0	0		0	8.296	0	0		0	17.6741	0	0		0	12.6243	0	0		0	18.3936	0	0		0	10.8391	0	0		0	22.0066	0	0		0	11.496	0	0
0			0		0			0		0			0		0			0		0			0		0			0		0			0		0			0		0			0		0			0
0	9.79155	0	0		0	4.3962	0	0		0	19.8317	0	0		0	8.44684	0	0		0	17.9954	0	0		0	12.8539	0	0		0	18.728	0	0		0	11.0361	0	0		0	22.4067	0	0		0	11.705	0	0
0			0		0			0		0			0		0			0		0			0		0			0		0			0		0			0		0			0		0			0
0	9.9664	0	0		0	4.47471	0	0		0	20.1858	0	0		0	8.59768	0	0		0	18.3168	0	0		0	13.0834	0	0		0	19.0624	0	0		0	11.2332	0	0		0	22.8069	0	0		0	11.914	0	0
0			0		0			0		0			0		0			0		0			0		0			0		0			0		0			0		0			0		0			0
0	10.1412	0	0		0	4.55321	0	0		0	20.54	0	0		0	8.74851	0	0		0	18.6381	0	0		0.0792438	13.313	0.595238	17.1465		0	19.3969	0	0		0	11.4303	0	0		0	23.207	0	0		0	12.123	0	0
0			0		0			0		0			0		0			0		0			0		0			0		0			0		0			0		0			0		0			0
0	10.3161	0	0		0	4.63171	0	0		0	20.8941	0	0		0	8.89935	0	0		0	18.9595	0	0		0	13.5425	0	0		0	19.7313	0	0		0	11.6274	0	0		0	23.6071	0	0		0	12.3321	0	0
0			0		0			0		0			0		0			0		0			0		0			0		0			0		0			0		0			0		0			0
0	10.4909	0	0		0	4.71022	0	0		0	21.2483	0	0		0	9.05019	0	0		0	19.2808	0	0		0	13.772	0	0		0	20.0657	0	0		0	11.8245	0	0		0	24.0072	0	0		0	12.5411	0	0
0			0		0			0		0			0		0			0		0			0		0			0		0			0		0			0		0			0		0			0
0	10.6658	0	0		0	4.78872	0	0		0	21.6024	0	0		0	9.20102	0	0		0	19.6022	0	0		0	14.0016	0	0		0	20.4002	0	0		0	12.0215	0	0		0	24.4073	0	0		0	12.7501	0	0
0			0		0			0		0			0		0			0		0			0		0			0		0			0		0			0		0			0		0			0
0	10.8406	0	0		0	4.86723	0	0		0	21.9565	0	0		0	9.35186	0	0		0	19.9235	0	0		0	14.2311	0	0		0	20.7346	0	0		0.0964626	12.2186	0.789474	11.0904		0	24.8074	0	0		0	12.9591	0	0
0			0		0			0		0			0		0			0		0			0		0			0		0			0		0			0		0			0		0			0
0.262274	11.0155	2.38095	60.6255		0	4.94573	0	0		0	22.3107	0	0		0	9.50269	0	0		0.119792	20.2449	0.591716	35.1658		0	14.4606	0	0		0	21.069	0	0		0	12.4157	0	0		0	25.2076	0	0		0	13.1681	0	0
0			0		0			0		0			0		0			0		0			0		0			0		0			0		0			0		0			0		0			0
0	11.1903	0	0		0	5.02423	0	0		0	22.6648	0	0		0	9.65353	0	0		0	20.5662	0	0		0	14.6902	0	0		0	21.4034	0	0		0	12.6127	0	0		0	25.6077	0	0		0	13.3772	0	0
0			0		0			0		0			0		0			0		0			0		0			0		0			0		0			0		0			0		0			0
0	11.3652	0	0		0	5.10274	0	0		0	23.019	0	0		0	9.80437	0	0		0	20.8876	0	0		0	14.9197	0	0		0	21.7379	0	0		0	12.8098	0	0		0	26.0078	0	0		0	13.5862	0	0
0			0		0			0		0			0		0			0		0			0		0			0		0			0		0			0		0			0		0			0
0	11.54	0	0		0	5.18124	0	0		0	23.3731	0	0		0	9.9552	0	0		0	21.2089	0	0		0	15.1492	0	0		0	22.0723	0	0		0	13.0069	0	0		0	26.4079	0	0		0	13.7952	0	0
0			0		0			0		0			0		0			0		0			0		0			0		0			0		0			0		0			0		0			0
0	11.7149	0	0		0	5.25974	0	0		0	23.7272	0	0		0.0515614	10.106	0.510204	3.61113		0	21.5303	0	0		0	15.3788	0	0		0	22.4067	0	0		0	13.204	0	0		0	26.8081	0	0		0	14.0042	0	0
0			0		0			0		0			0		0			0		0			0		0			0		0			0		0			0		0			0		0			0
0	11.8897	0	0		0	5.33825	0	0		0	24.0814	0	0		0	10.2569	0	0		0	21.8516	0	0		0	15.6083	0	0		0	22.7412	0	0		0	13.401	0	0		0	27.2082	0	0		0	14.2132	0	0
0			0		0			0		0			0		0			0		0			0		0			0		0			0		0			0		0			0		0			0
0	12.0646	0	0		0	5.41675	0	0		0	24.4355	0	0		0	10.4077	0	0		0	22.173	0	0		0	15.8378	0	0		0	23.0756	0	0		0	13.5981	0	0		0	27.6083	0	0		0	14.4222	0	0
0			0		0			0		0			0		0			0		0			0		0			0		0			0		0			0		0			0		0			0
0	12.2394	0	0		0	5.49526	0	0		0	24.7896	0	0		0	10.5586	0	0		0	22.4943	0	0		0	16.0674	0	0		0	23.41	0	0		0	13.7952	0	0		0	28.0084	0	0		0	14.6313	0	0
0			0		0			0		0			0		0			0		0			0		0			0		0			0		0			0		0			0		0			0
0	12.4143	0	0		0	5.57376	0	0		0	25.1438	0	0		0	10.7094	0	0		0	22.8157	0	0		0	16.2969	0	0		0	23.7444	0	0		0	13.9923	0	0		0	28.4085	0	0		0	14.8403	0	0
0			0		0			0		0			0		0			0		0			0		0			0		0			0		0			0		0			0		0			0
0	12.5891	0	0		0	5.65226	0	0		0	25.4979	0	0		0	10.8602	0	0		0	23.137	0	0		0	16.5264	0	0		0	24.0789	0	0		0	14.1893	0	0		0	28.8087	0	0		0	15.0493	0	0
0			0		0			0		0			0		0			0		0			0		0			0		0			0		0			0		0			0		0			0
0	12.764	0	0		0	5.73077	0	0		0	25.852	0	0		0	11.0111	0	0		0.138807	23.4583	0.591716	32.2952		0	16.756	0	0		0.169537	24.4133	0.694445	25.5134		0	14.3864	0	0		0	29.2088	0	0		0.04954	15.2583	0.324675	7.16458
0			0		0			0		0			0		0			0		0			0		0			0		0			0		0			0		0			0		0			0
0	12.9388	0	0		0	5.80927	0	0		0	26.2062	0	0		0	11.1619	0	0		0	23.7797	0	0		0	16.9855	0	0		0	24.7477	0	0		0	14.5835	0	0		0	29.6089	0	0		0	15.4673	0	0
0			0		0			0		0			0		0			0		0			0		0			0		0			0		0			0		0			0		0			0
0	13.1137	0	0		0	5.88777	0	0		0	26.5603	0	0		0	11.3127	0	0		0	24.101	0	0		0	17.215	0	0		0	25.0822	0	0		0	14.7806	0	0		0	30.009	0	0		0	15.6763	0	0
0			0		0			0		0			0		0			0		0			0		0			0		0			0		0			0		0			0		0			0
0	13.2885	0	0		0	5.96628	0	0		0.64082	26.9145	2.38095	109.232		0	11.4636	0	0		0	24.4224	0	0		0	17.4446	0	0		0	25.4166	0	0		0	14.9776	0	0		0	30.4091	0	0		0	15.8854	0	0
0			0		0			0		0			0		0			0		0			0		0			0		0			0		0			0		0			0		0			0
0	13.4634	0	0		0	6.04478	0	0		0	27.2686	0	0		0	11.6144	0	0		0	24.7437	0	0		0	17.6741	0	0		0	25.751	0	0		0.0798669	15.1747	0.526316	6.27329		0	30.8092	0	0		0	16.0944	0	0
0			0		0			0		0			0		0			0		0			0		0			0		0			0		0			0		0			0		0			0
0	13.6382	0	0		0	6.12328	0	0		0	27.6227	0	0		0	11.7652	0	0		0	25.0651	0	0		0	17.9036	0	0		0	26.0855	0	0		0	15.3718	0	0		0	31.2094	0	0		0	16.3034	0	0
0			0		0			0		0			0		0			0		0			0		0			0		0			0		0			0		0			0		0			0
0	13.8131	0	0		0	6.20179	0	0		0	27.9769	0	0		0	11.9161	0	0		0	25.3864	0	0		0	18.1332	0	0		0	26.4199	0	0		0	15.5688	0	0		0	31.6095	0	0		0	16.5124	0	0
0			0		0			0		0			0		0			0		0			0		0			0		0			0		0			0		0			0		0			0
0	13.9879	0	0		0	6.28029	0	0		0	28.331	0	0		0	12.0669	0	0		0	25.7078	0	0		0	18.3627	0	0		0	26.7543	0	0		0	15.7659	0	0		0	32.0096	0	0		0	16.7214	0	0
0			0		0			0		0			0		0			0		0			0		0			0		0			0		0			0		0			0		0			0
0	14.1628	0	0		0	6.35879	0	0		0	28.6852	0	0		0	12.2178	0	0		0	26.0291	0	0		0	18.5922	0	0		0	27.0887	0	0		0	15.963	0	0		0	32.4097	0	0		0	16.9305	0	0
0			0		0			0		0			0		0			0		0			0		0			0		0			0		0			0		0			0		0			0
0	14.3376	0	0		0	6.4373	0	0		0	29.0393	0	0		0	12.3686	0	0		0	26.3505	0	0		0	18.8218	0	0		0.190439	27.4232	0.694445	23.0424		0	16.1601	0	0		0	32.8098	0	0		0	17.1395	0	0
0			0		0			0		0			0		0			0		0			0		0			0		0			0		0			0		0			0		0			0
0	14.5125	0	0		0	6.5158	0	0		0	29.3934	0	0		0	12.5194	0	0		0.157821	26.6718	0.591716	29.5468		0	19.0513	0	0		0	27.7576	0	0		0	16.3572	0	0		0	33.21	0	0		0	17.3485	0	0
0			0		0			0		0			0		0			0		0			0		0			0		0			0		0			0		0			0		0			0
0	14.6873	0	0		0	6.59431	0	0		0	29.7476	0	0		0	12.6703	0	0		0	26.9932	0	0		0	19.2808	0	0		0	28.092	0	0		0	16.5542	0	0		0	33.6101	0	0		0	17.5575	0	0
0			0		0			0		0			0		0			0		0			0		0			0		0			0		0			0		0			0		0			0
0	14.8622	0	0		0	6.67281	0	0		0	30.1017	0	0		0	12.8211	0	0		0	27.3145	0	0		0	19.5104	0	0		0	28.4264	0	0		0	16.7513	0	0		0	34.0102	0	0		0	17.7665	0	0
0			0		0			0		0			0		0			0		0			0		0			0		0			0		0			0		0			0		0			0
0	15.037	0	0		0	6.75131	0	0		0	30.4558	0	0		0	12.9719	0	0		0	27.6359	0	0		0	19.7399	0	0		0	28.7609	0	0		0	16.9484	0	0		0	34.4103	0	0		0	17.9755	0	0
0			0		0			0		0			0		0			0		0			0		0			0		0			0		0			0		0			0		0			0
0	15.2119	0	0		0	6.82982	0	0		0	30.81	0	0		0	13.1228	0	0		0	27.9572	0	0		0	19.9694	0	0		0	29.0953	0	0		0	17.1455	0	0		0	34.8105	0	0		0	18.1846	0	0
0			0		0			0		0			0		0			0		0			0		0			0		0			0		0			0		0			0		0			0
0	15.3867	0	0		0	6.90832	0	0		0	31.1641	0	0		0	13.2736	0	0		0	28.2785	0	0		0.480928	20.199	2.38095	52.1157		0	29.4297	0	0		0	17.3425	0	0		0	35.2106	0	0		0.0597194	18.3936	0.324675	6.24013
0			0		0			0		0			0		0			0		0			0		0			0		0			0		0			0		0			0		0			0
0	15.5616	0	0		0	6.98682	0	0		0	31.5183	0	0		0.205476	13.4244	1.53061	8.29939		0	28.5999	0	0		0	20.4285	0	0		0	29.7642	0	0		0	17.5396	0	0		0	35.6107	0	0		0	18.6026	0	0
0			0		0			0		0			0		0			0		0			0		0			0		0			0		0			0		0			0		0			0
0	15.7364	0	0		0	7.06533	0	0		0	31.8724	0	0		0	13.5753	0	0		0	28.9213	0	0		0	20.658	0	0		0	30.0986	0	0		0	17.7367	0	0		0	36.0108	0	0		0	18.8116	0	0
0			0		0			0		0			0		0			0		0			0		0			0		0			0		0			0		0			0		0			0
0	15.9113	0	0		0	7.14383	0	0		0	32.2265	0	0		0	13.7261	0	0		0	29.2426	0	0		0	20.8876	0	0		0.21134	30.433	0.694445	20.6973		0	17.9337	0	0		0	36.4109	0	0		0	19.0206	0	0
0			0		0			0		0			0		0			0		0			0		0			0		0			0		0			0		0			0		0			0
0	16.0861	0	0		0	7.22234	0	0		0	32.5807	0	0		0	13.877	0	0		0	29.5639	0	0		0	21.1171	0	0		0	30.7675	0	0		0	18.1308	0	0		0	36.8111	0	0		0	19.2296	0	0
0			0		0			0		0			0		0			0		0			0		0			0		0			0		0			0		0			0		0			0
0	16.261	0	0		0.324482	7.30084	4.44444	9.84516		0	32.9348	0	0		0	14.0278	0	0		0	29.8853	0	0		0	21.3466	0	0		0	31.1019	0	0		0.241156	18.3279	1.31579	12.9493		0	37.2112	0	0		0	19.4387	0	0
0			0		0			0		0			0		0			0		0			0		0			0		0			0		0			0		0			0		0			0
0	16.4358	0	0		0	7.37934	0	0		0	33.2889	0	0		0	14.1786	0	0		0.357475	30.2066	1.18343	53.3294		0	21.5762	0	0		0	31.4363	0	0		0	18.525	0	0		0	37.6113	0	0		0	19.6477	0	0
0			0		0			0		0			0		0			0		0			0		0			0		0			0		0			0		0			0		0			0
0	16.6107	0	0		0	7.45785	0	0		0.801026	33.6431	2.38095	88.6081		0	14.3295	0	0		0	30.528	0	0		0	21.8057	0	0		0	31.7707	0	0		0	18.722	0	0		0	38.0114	0	0		0	19.8567	0	0
0			0		0			0		0			0		0			0		0			0		0			0		0			0		0			0		0			0		0			0
0	16.7855	0	0		0	7.53635	0	0		0	33.9972	0	0		0	14.4803	0	0		0	30.8493	0	0		0	22.0352	0	0		0	32.1052	0	0		0	18.9191	0	0		0	38.4115	0	0		0	20.0657	0	0
0			0		0			0		0			0		0			0		0			0		0			0		0			0		0			0		0			0		0			0
0	16.9604	0	0		0	7.61485	0	0		0	34.3514	0	0		0	14.6311	0	0		0	31.1707	0	0		0	22.2648	0	0		0	32.4396	0	0		0	19.1162	0	0		0	38.8117	0	0		0	20.2748	0	0
0			0		0			0		0			0		0			0		0			0		0			0		0			0		0			0		0			0		0			0
0	17.1352	0	0		0	7.69336	0	0		0	34.7055	0	0		0	14.782	0	0		0	31.492	0	0		0	22.4943	0	0		0	32.774	0	0		0	19.3133	0	0		0	39.2118	0	0		0	20.4838	0	0
0			0		0			0		0			0		0			0		0			0		0			0		0			0		0			0		0			0		0			0
0	17.3101	0	0		0	7.77186	0	0		0	35.0596	0	0		0	14.9328	0	0		0	31.8134	0	0		0	22.7238	0	0		0	33.1084	0	0		0	19.5103	0	0		0.565884	39.6119	1.42857	83.3541		0	20.6928	0	0
0			0		0			0		0			0		0			0		0			0		0			0		0			0		0			0		0			0		0			0
0	17.4849	0	0		0	7.85036	0	0		0	35.4138	0	0		0	15.0836	0	0		0	32.1347	0	0		0	22.9534	0	0		0.464484	33.4429	1.38889	36.9561		0	19.7074	0	0		0	40.012	0	0		0	20.9018	0	0
0			0		0			0		0			0		0			0		0			0		0			0		0			0		0			0		0			0		0			0
0	17.6597	0	0		0	7.92887	0	0		0	35.7679	0	0		0	15.2345	0	0		0	32.4561	0	0		0	23.1829	0	0		0	33.7773	0	0		0	19.9045	0	0		0	40.4121	0	0		0	21.1108	0	0
0			0		0			0		0			0		0			0		0			0		0			0		0			0		0			0		0			0		0			0
0	17.8346	0	0		0	8.00737	0	0		0	36.1221	0	0		0	15.3853	0	0		0	32.7774	0	0		0.418079	23.4124	1.78571	33.9018		0	34.1117	0	0		0	20.1016	0	0		0	40.8122	0	0		0.138441	21.3198	0.649351	10.8698
0			0		0			0		0			0		0			0		0			0		0			0		0			0		0			0		0			0		0			0
0	18.0095	0	0		0	8.08587	0	0		0	36.4762	0	0		0	15.5361	0	0		0	33.0988	0	0		0	23.642	0	0		0	34.4462	0	0		0	20.2986	0	0		0	41.2124	0	0		0	21.5288	0	0
0			0		0			0		0			0		0			0		0			0		0			0		0			0		0			0		0			0		0			0
0	18.1843	0	0		0	8.16438	0	0		2.63074	36.8303	7.14286	238.773		0	15.687	0	0		0	33.4201	0	0		0	23.8715	0	0		0	34.7806	0	0		0	20.4957	0	0		0	41.6125	0	0		0	21.7379	0	0
0			0		0			0		0			0		0			0		0			0		0			0		0			0		0			0		0			0		0			0
0	18.3591	0	0		0	8.24288	0	0		0	37.1845	0	0		0	15.8378	0	0		0	33.7415	0	0		0	24.101	0	0		0	35.115	0	0		0	20.6928	0	0		0	42.0126	0	0		0	21.9469	0	0
0			0		0			0		0			0		0			0		0			0		0			0		0			0		0			0		0			0		0			0
0	18.534	0	0		0	8.32139	0	0		0	37.5386	0	0		0	15.9887	0	0		0	34.0628	0	0		0	24.3306	0	0		0	35.4494	0	0		0	20.8899	0	0		0	42.4127	0	0		0	22.1559	0	0
0			0		0			0		0			0		0			0		0			0		0			0		0			0		0			0		0			0		0			0
0	18.7089	0	0		0	8.39989	0	0		0	37.8927	0	0		0	16.1395	0	0		0	34.3841	0	0		0	24.5601	0	0		0	35.7839	0	0		0	21.0869	0	0		0	42.8129	0	0		0	22.3649	0	0
0			0		0			0		0			0		0			0		0			0		0			0		0			0		0			0		0			0		0			0
0	18.8837	0	0		0	8.47839	0	0		0	38.2469	0	0		0	16.2903	0	0		0	34.7055	0	0		0	24.7896	0	0		0	36.1183	0	0		0.280053	21.284	1.31579	10.6238		0	43.213	0	0		0	22.5739	0	0
0			0		0			0		0			0		0			0		0			0		0			0		0			0		0			0		0			0		0			0
0	19.0585	0	0		0	8.5569	0	0		0	38.601	0	0		0	16.4412	0	0		0	35.0268	0	0		0	25.0192	0	0		0	36.4527	0	0		0	21.4811	0	0		0	43.6131	0	0		0	22.783	0	0
0			0		0			0		0			0		0			0		0			0		0			0		0			0		0			0		0			0		0			0
0	19.2334	0	0		0	8.6354	0	0		0	38.9552	0	0		0	16.592	0	0		0	35.3482	0	0		0	25.2487	0	0		0.255466	36.7872	0.694445	16.1598		0	21.6781	0	0		0	44.0132	0	0		0	22.992	0	0
0			0		0			0		0			0		0			0		0			0		0			0		0			0		0			0		0			0		0			0
0	19.4082	0	0		0	8.7139	0	0		0	39.3093	0	0		0.854227	16.7428	5.10204	20.3416		0	35.6695	0	0		0	25.4782	0	0		0	37.1216	0	0		0	21.8752	0	0		0	44.4133	0	0		0	23.201	0	0
0			0		0			0		0			0		0			0		0			0		0			0		0			0		0			0		0			0		0			0
0	19.5831	0	0		0	8.79241	0	0		0	39.6634	0	0		0	16.8937	0	0		0	35.9909	0	0		0	25.7078	0	0		0	37.456	0	0		0	22.0723	0	0		0	44.8135	0	0		0	23.41	0	0
0			0		0			0		0			0		0			0		0			0		0			0		0			0		0			0		0			0		0			0
0	19.7579	0	0		0	8.87091	0	0		0	40.0176	0	0		0	17.0445	0	0		0	36.3122	0	0		0	25.9373	0	0		0	37.7904	0	0		0	22.2694	0	0		0	45.2136	0	0		0	23.619	0	0
0			0		0			0		0			0		0			0		0			0		0			0		0			0		0			0		0			0		0			0
0	19.9328	0	0		0	8.94942	0	0		0	40.3717	0	0		0	17.1954	0	0		0	36.6336	0	0		0	26.1668	0	0		0	38.1249	0	0		0	22.4664	0	0		0	45.6137	0	0		0	23.8281	0	0
0			0		0			0		0			0		0			0		0			0		0			0		0			0		0			0		0			0		0			0
0	20.1076	0	0		0	9.02792	0	0		0	40.7258	0	0		0	17.3462	0	0		0.218668	36.9549	0.591716	21.5731		0	26.3964	0	0		0	38.4593	0	0		0	22.6635	0	0		0	46.0138	0	0		0	24.0371	0	0
0			0		0			0		0			0		0			0		0			0		0			0		0			0		0			0		0			0		0			0
0	20.2825	0	0		0.303547	9.10642	3.33333	5.70099		0	41.08	0	0		0	17.497	0	0		0	37.2763	0	0		0	26.6259	0	0		0	38.7937	0	0		0	22.8606	0	0		0	46.4139	0	0		0	24.2461	0	0
0			0		0			0		0			0		0			0		0			0		0			0		0			0		0			0		0			0		0			0
0	20.4573	0	0		0	9.18493	0	0		0	41.4341	0	0		0	17.6479	0	0		0	37.5976	0	0		0.159854	26.8555	0.595238	9.58523		0	39.1282	0	0		0	23.0577	0	0		0	46.8141	0	0		0.396999	24.4551	1.62338	23.1693
0			0		0			0		0			0		0			0		0			0		0			0		0			0		0			0		0			0		0			0
0	20.6322	0	0		0	9.26343	0	0		0	41.7882	0	0		0	17.7987	0	0		0	37.919	0	0		0	27.085	0	0		0	39.4626	0	0		0	23.2547	0	0		0	47.2142	0	0		0	24.6641	0	0
0			0		0			0		0			0		0			0		0			0		0			0		0			0		0			0		0			0		0			0
0	20.807	0	0		0	9.34193	0	0		0	42.1424	0	0		0	17.9495	0	0		0	38.2403	0	0		0	27.3145	0	0		0	39.797	0	0		0	23.4518	0	0		0	47.6143	0	0		0	24.8731	0	0
0			0		0			0		0			0		0			0		0			0		0			0		0			0		0			0		0			0		0			0
0	20.9819	0	0		0	9.42044	0	0		0	42.4965	0	0		0	18.1004	0	0		0	38.5617	0	0		0	27.544	0	0		0	40.1315	0	0		0	23.6489	0	0		0	48.0144	0	0		0	25.0822	0	0
0			0		0			0		0			0		0			0		0			0		0			0		0			0		0			0		0			0		0			0
0	21.1567	0	0		0	9.49894	0	0		0	42.8507	0	0		0	18.2512	0	0		0	38.883	0	0		0	27.7736	0	0		0	40.4659	0	0		0	23.846	0	0		0	48.4145	0	0		0	25.2912	0	0
0			0		0			0		0			0		0			0		0			0		0			0		0			0		0			0		0			0		0			0
0	21.3316	0	0		0	9.57744	0	0		0	43.2048	0	0		0	18.402	0	0		0	39.2044	0	0		0	28.0031	0	0		0	40.8003	0	0		0	24.043	0	0		0.348676	48.8147	0.714286	32.2397		0	25.5002	0	0
0			0		0			0		0			0		0			0		0			0		0			0		0			0		0			0		0			0		0			0
0	21.5064	0	0		0	9.65595	0	0		1.03712	43.5589	2.38095	62.1438		0	18.5529	0	0		0	39.5257	0	0		0	28.2326	0	0		0	41.1347	0	0		0	24.2401	0	0		0	49.2148	0	0		0	25.7092	0	0
0			0		0			0		0			0		0			0		0			0		0			0		0			0		0			0		0			0		0			0
0	21.6813	0	0		0	9.73445	0	0		0	43.9131	0	0		0	18.7037	0	0		0	39.8471	0	0		0	28.4622	0	0		0	41.4692	0	0		0.578776	24.4372	2.36842	15.1143		0	49.6149	0	0		0	25.9182	0	0
0			0		0			0		0			0		0			0		0			0		0			0		0			0		0			0		0			0		0			0
0	21.8561	0	0		0	9.81296	0	0		0	44.2672	0	0		0	18.8545	0	0		0.475366	40.1684	1.18343	38.676		0	28.6917	0	0		0	41.8036	0	0		0	24.6343	0	0		0	50.015	0	0		0	26.1273	0	0
0			0		0			0		0			0		0			0		0			0		0			0		0			0		0			0		0			0		0			0
0	22.031	0	0		0	9.89146	0	0		0	44.6213	0	0		0	19.0054	0	0		0	40.4898	0	0		0	28.9213	0	0		0	42.138	0	0		0	24.8313	0	0		0	50.4151	0	0		0	26.3363	0	0
0			0		0			0		0			0		0			0		0			0		0			0		0			0		0			0		0			0		0			0
0	22.2058	0	0		0	9.96996	0	0		0	44.9755	0	0		0	19.1562	0	0		0	40.8111	0	0		0	29.1508	0	0		0	42.4725	0	0		0	25.0284	0	0		0	50.8153	0	0		0	26.5453	0	0
0			0		0			0		0			0		0			0		0			0		0			0		0			0		0			0		0			0		0			0
0	22.3807	0	0		0	10.0485	0	0		0	45.3296	0	0		0	19.3071	0	0		0	41.1324	0	0		0	29.3803	0	0		0.29727	42.8069	0.694445	12.3783		0	25.2255	0	0		0	51.2154	0	0		0	26.7543	0	0
0			0		0			0		0			0		0			0		0			0		0			0		0			0		0			0		0			0		0			0
0	22.5555	0	0		0	10.127	0	0		0	45.6838	0	0		0	19.4579	0	0		0	41.4538	0	0		0	29.6099	0	0		0	43.1413	0	0		0	25.4226	0	0		0	51.6155	0	0		0	26.9633	0	0
0			0		0			0		0			0		0			0		0			0		0			0		0			0		0			0		0			0		0			0
0	22.7304	0	0		0	10.2055	0	0		0	46.0379	0	0		0	19.6087	0	0		0	41.7751	0	0		0	29.8394	0	0		0	43.4757	0	0		0	25.6196	0	0		0	52.0156	0	0		0	27.1723	0	0
0			0		0			0		0			0		0			0		0			0		0			0		0			0		0			0		0			0		0			0
0	22.9052	0	0		0	10.284	0	0		0	46.392	0	0		0	19.7596	0	0		0	42.0965	0	0		0.357963	30.0689	1.19048	16.2231		0	43.8102	0	0		0	25.8167	0	0		0	52.4157	0	0		0.266702	27.3814	0.974026	11.8314
0			0		0			0		0			0		0			0		0			0		0			0		0			0		0			0		0			0		0			0
0	23.0801	0	0		0	10.3625	0	0		1.113	46.7462	2.38095	54.6318		0	19.9104	0	0		0	42.4178	0	0		0	30.2984	0	0		0	44.1446	0	0		0	26.0138	0	0		0	52.8159	0	0		0	27.5904	0	0
0			0		0			0		0			0		0			0		0			0		0			0		0			0		0			0		0			0		0			0
0	23.2549	0	0		0	10.441	0	0		0	47.1003	0	0		0.61412	20.0613	3.06122	8.48534		0	42.7392	0	0		0	30.528	0	0		0	44.479	0	0		0	26.2109	0	0		0	53.216	0	0		0	27.7994	0	0
0			0		0			0		0			0		0			0		0			0		0			0		0			0		0			0		0			0		0			0
0	23.4298	0	0		0	10.5195	0	0		0	47.4545	0	0		0	20.2121	0	0		0	43.0605	0	0		0	30.7575	0	0		0	44.8135	0	0		0	26.4079	0	0		0	53.6161	0	0		0	28.0084	0	0
0			0		0			0		0			0		0			0		0			0		0			0		0			0		0			0		0			0		0			0
0	23.6046	0	0		0	10.598	0	0		0	47.8086	0	0		0	20.3629	0	0		0	43.3819	0	0		0	30.987	0	0		0	45.1479	0	0		0	26.605	0	0		0	54.0162	0	0		0	28.2174	0	0
0			0		0			0		0			0		0			0		0			0		0			0		0			0		0			0		0			0		0			0
0	23.7795	0	0		0	10.6765	0	0		0	48.1627	0	0		0	20.5138	0	0		1.0344	43.7032	2.36686	68.0819		0	31.2166	0	0		0	45.4823	0	0		0	26.8021	0	0		0	54.4163	0	0		0	28.4264	0	0
0			0		0			0		0			0		0			0		0			0		0			0		0			0		0			0		0			0		0			0
0	23.9543	0	0		0	10.755	0	0		0	48.5169	0	0		0	20.6646	0	0		0	44.0246	0	0		0	31.4461	0	0		0	45.8167	0	0		0	26.9992	0	0		0	54.8165	0	0		0	28.6355	0	0
0			0		0			0		0			0		0			0		0			0		0			0		0			0		0			0		0			0		0			0
0	24.1292	0	0		0	10.8335	0	0		0	48.871	0	0		0	20.8154	0	0		0	44.3459	0	0		0	31.6757	0	0		0	46.1512	0	0		0	27.1962	0	0		0	55.2166	0	0		0	28.8445	0	0
0			0		0			0		0			0		0			0		0			0		0			0		0			0		0			0		0			0		0			0
0	24.304	0	0		0.363734	10.912	3.33333	4.23545		0	49.2251	0	0		0	20.9663	0	0		0	44.6673	0	0		0	31.9052	0	0		0	46.4856	0	0		0.720876	27.3933	2.63158	13.0932		0	55.6167	0	0		0	29.0535	0	0
0			0		0			0		0			0		0			0		0			0		0			0		0			0		0			0		0			0		0			0
0	24.4789	0	0		0	10.9905	0	0		0	49.5793	0	0		0	21.1171	0	0		0	44.9886	0	0		0	32.1347	0	0		0	46.82	0	0		0	27.5904	0	0		0	56.0168	0	0		0	29.2625	0	0
0			0		0			0		0			0		0			0		0			0		0			0		0			0		0			0		0			0		0			0
0	24.6537	0	0		0	11.069	0	0		0	49.9334	0	0		0	21.2679	0	0		0	45.31	0	0		0	32.3642	0	0		0	47.1545	0	0		0	27.7874	0	0		0	56.4169	0	0		0	29.4715	0	0
0			0		0			0		0			0		0			0		0			0		0			0		0			0		0			0		0			0		0			0
0	24.8286	0	0		0	11.1475	0	0		0	50.2876	0	0		0	21.4188	0	0		0	45.6313	0	0		0	32.5938	0	0		0	47.4889	0	0		0	27.9845	0	0		0	56.8171	0	0		0	29.6806	0	0
0			0		0			0		0			0		0			0		0			0		0			0		0			0		0			0		0			0		0			0
0	25.0034	0	0		0	11.226	0	0		0	50.6417	0	0		0	21.5696	0	0		0	45.9526	0	0		0	32.8233	0	0		0	47.8233	0	0		0	28.1816	0	0		0	57.2172	0	0		0	29.8896	0	0
0			0		0			0		0			0		0			0		0			0		0			0		0			0		0			0		0			0		0			0
0	25.1783	0	0		0	11.3045	0	0		0	50.9958	0	0		0	21.7204	0	0		0	46.274	0	0		0	33.0529	0	0		0	48.1577	0	0		0	28.3787	0	0		0	57.6173	0	0		0	30.0986	0	0
0			0		0			0		0			0		0			0		0			0		0			0		0			0		0			0		0			0		0			0
0	25.3531	0	0		0	11.383	0	0		0	51.35	0	0		0	21.8713	0	0		0	46.5953	0	0		0	33.2824	0	0		0	48.4922	0	0		0	28.5757	0	0		0.82882	58.0174	1.42857	48.0244		0	30.3076	0	0
0			0		0			0		0			0		0			0		0			0		0			0		0			0		0			0		0			0		0			0
0	25.528	0	0		0	11.4615	0	0		0	51.7041	0	0		0	22.0221	0	0		0.832841	46.9167	1.77515	45.1259		0.398951	33.5119	1.19048	13.338		0.339074	48.8266	0.694445	9.10008		0	28.7728	0	0		0	58.4175	0	0		0.4954	30.5166	1.62338	16.3308
0			0		0			0		0			0		0			0		0			0		0			0		0			0		0			0		0			0		0			0
0	25.7028	0	0		0	11.54	0	0		0	52.0582	0	0		0	22.173	0	0		0	47.238	0	0		0	33.7415	0	0		0	49.161	0	0		0	28.9699	0	0		0	58.8177	0	0		0	30.7256	0	0
0			0		0			0		0			0		0			0		0			0		0			0		0			0		0			0		0			0		0			0
0	25.8777	0	0		0	11.6185	0	0		0	52.4124	0	0		0	22.3238	0	0		0	47.5594	0	0		0	33.971	0	0		0	49.4955	0	0		0	29.167	0	0		0	59.2178	0	0		0	30.9347	0	0
0			0		0			0		0			0		0			0		0			0		0			0		0			0		0			0		0			0		0			0
0	26.0525	0	0		0	11.697	0	0		0	52.7665	0	0		0	22.4746	0	0		0	47.8807	0	0		0	34.2005	0	0		0	49.8299	0	0		0	29.364	0	0		0	59.6179	0	0		0	31.1437	0	0
0			0		0			0		0			0		0			0		0			0		0			0		0			0		0			0		0			0		0			0
0	26.2274	0	0		0	11.7756	0	0		0	53.1207	0	0		0	22.6255	0	0		0	48.2021	0	0		0	34.4301	0	0		0	50.1643	0	0		0	29.5611	0	0		0	60.018	0	0		0	31.3527	0	0
0			0		0			0		0			0		0			0		0			0		0			0		0			0		0			0		0			0		0			0
0	26.4022	0	0		0	11.8541	0	0		1.27321	53.4748	2.38095	40.3617		0	22.7763	0	0		0	48.5234	0	0		0	34.6596	0	0		0	50.4988	0	0		0	29.7582	0	0		0	60.4181	0	0		0	31.5617	0	0
0			0		0			0		0			0		0			0		0			0		0			0		0			0		0			0		0			0		0			0
0	26.577	0	0		0	11.9326	0	0		0	53.8289	0	0		0	22.9271	0	0		0	48.8448	0	0		0	34.8891	0	0		0	50.8332	0	0		0	29.9553	0	0		0	60.8183	0	0		0	31.7707	0	0
0			0		0			0		0			0		0			0		0			0		0			0		0			0		0			0		0			0		0			0
0	26.7519	0	0		0	12.0111	0	0		0	54.1831	0	0		0	23.078	0	0		0	49.1661	0	0		0	35.1187	0	0		0	51.1676	0	0		0	30.1523	0	0		0.874548	61.2184	1.42857	42.8682		0	31.9797	0	0
0			0		0			0		0			0		0			0		0			0		0			0		0			0		0			0		0			0		0			0
0	26.9267	0	0		0	12.0896	0	0		0	54.5372	0	0		0	23.2288	0	0		0	49.4875	0	0		0	35.3482	0	0		0	51.502	0	0		0	30.3494	0	0		0	61.6185	0	0		0	32.1888	0	0
0			0		0			0		0			0		0			0		0			0		0			0		0			0		0			0		0			0		0			0
0	27.1016	0	0		0	12.1681	0	0		0	54.8914	0	0		0	23.3797	0	0		0	49.8088	0	0		0	35.5777	0	0		0.719951	51.8365	1.38889	15.2994		1.20578	30.5465	3.94737	14.4796		0	62.0186	0	0		0	32.3978	0	0
0			0		0			0		0			0		0			0		0			0		0			0		0			0		0			0		0			0		0			0
0	27.2765	0	0		0	12.2466	0	0		0	55.2455	0	0		1.92086	23.5305	8.16327	14.18		0.593256	50.1302	1.18343	26.3714		0	35.8073	0	0		0	52.1709	0	0		0	30.7436	0	0		0	62.4187	0	0		0	32.6068	0	0
0			0		0			0		0			0		0			0		0			0		0			0		0			0		0			0		0			0		0			0
0	27.4513	0	0		0	12.3251	0	0		0	55.5996	0	0		0	23.6813	0	0		0	50.4515	0	0		0	36.0368	0	0		0	52.5053	0	0		0	30.9406	0	0		0	62.8189	0	0		0	32.8158	0	0
0			0		0			0		0			0		0			0		0			0		0			0		0			0		0			0		0			0		0			0
0	27.6261	0	0		0	12.4036	0	0		0	55.9538	0	0		0	23.8322	0	0		0	50.7729	0	0		0	36.2663	0	0		0	52.8398	0	0		0	31.1377	0	0		0	63.219	0	0		0	33.0248	0	0
0			0		0			0		0			0		0			0		0			0		0			0		0			0		0			0		0			0		0			0
0	27.801	0	0		0	12.4821	0	0		0	56.3079	0	0		0	23.983	0	0		0	51.0942	0	0		0	36.4959	0	0		0	53.1742	0	0		0	31.3348	0	0		0	63.6191	0	0		0	33.2339	0	0
0			0		0			0		0			0		0			0		0			0		0			0		0			0		0			0		0			0		0			0
0	27.9758	0	0		0	12.5606	0	0		0	56.662	0	0		0	24.1338	0	0		0	51.4156	0	0		0	36.7254	0	0		0	53.5086	0	0		0	31.5319	0	0		1.82912	64.0192	2.85714	77.1931		0	33.4429	0	0
0			0		0			0		0			0		0			0		0			0		0			0		0			0		0			0		0			0		0			0
0	28.1507	0	0		0	12.6391	0	0		0	57.0162	0	0		0	24.2847	0	0		0	51.7369	0	0		0.21997	36.9549	0.595238	5.36761		0	53.843	0	0		0	31.7289	0	0		0	64.4193	0	0		0.655556	33.6519	1.94805	15.9141
0			0		0			0		0			0		0			0		0			0		0			0		0			0		0			0		0			0		0			0
0	28.3255	0	0		0	12.7176	0	0		0	57.3703	0	0		0	24.4355	0	0		0	52.0582	0	0		0	37.1845	0	0		0	54.1775	0	0		0	31.926	0	0		0	64.8195	0	0		0	33.8609	0	0
0			0		0			0		0			0		0			0		0			0		0			0		0			0		0			0		0			0		0			0
0	28.5004	0	0		0.995251	12.7961	7.77778	6.85515		0	57.7244	0	0		0	24.5863	0	0		0	52.3796	0	0		0	37.414	0	0		0	54.5119	0	0		0	32.1231	0	0		0	65.2196	0	0		0	34.0699	0	0
0			0		0			0		0			0		0			0		0			0		0			0		0			0		0			0		0			0		0			0
0	28.6752	0	0		0	12.8746	0	0		0	58.0786	0	0		0	24.7372	0	0		0	52.7009	0	0		0	37.6435	0	0		1.14263	54.8463	2.08333	18.9755		0	32.3201	0	0		0	65.6197	0	0		0	34.279	0	0
0			0		0			0		0			0		0			0		0			0		0			0		0			0		0			0		0			0		0			0
0	28.8501	0	0		0	12.9531	0	0		0	58.4327	0	0		0	24.888	0	0		0	53.0223	0	0		0	37.8731	0	0		0	55.1808	0	0		0	32.5172	0	0		0	66.0198	0	0		0	34.488	0	0
0			0		0			0		0			0		0			0		0			0		0			0		0			0		0			0		0			0		0			0
0	29.0249	0	0		0	13.0316	0	0		0	58.7869	0	0		0	25.0389	0	0		0	53.3436	0	0		0	38.1026	0	0		0	55.5152	0	0		0	32.7143	0	0		0	66.42	0	0		0	34.697	0	0
0			0		0			0		0			0		0			0		0			0		0			0		0			0		0			0		0			0		0			0
0	29.1998	0	0		0	13.1101	0	0		0	59.141	0	0		0	25.1897	0	0		1.27018	53.665	2.36686	45.1396		0	38.3321	0	0		0	55.8496	0	0		0	32.9114	0	0		0	66.8201	0	0		0	34.906	0	0
0			0		0			0		0			0		0			0		0			0		0			0		0			0		0			0		0			0		0			0
0	29.3746	0	0		0	13.1886	0	0		0	59.4951	0	0		0	25.3405	0	0		0	53.9863	0	0		0	38.5617	0	0		0	56.184	0	0		0	33.1084	0	0		0.960288	67.2202	1.42857	33.9892		0	35.115	0	0
0			0		0			0		0			0		0			0		0			0		0			0		0			0		0			0		0			0		0			0
0	29.5495	0	0		0	13.2671	0	0		0	59.8493	0	0		0	25.4914	0	0		0	54.3077	0	0		0	38.7912	0	0		0	56.5185	0	0		0	33.3055	0	0		0	67.6203	0	0		0	35.324	0	0
0			0		0			0		0			0		0			0		0			0		0			0		0			0		0			0		0			0		0			0
0	29.7243	0	0		0	13.3456	0	0		0	60.2034	0	0		0	25.6422	0	0		0	54.629	0	0		0	39.0207	0	0		0	56.8529	0	0		1.41064	33.5026	4.21053	11.0452		0	68.0204	0	0		0	35.5331	0	0
0			0		0			0		0			0		0			0		0			0		0			0		0			0		0			0		0			0		0			0
0	29.8992	0	0		0	13.4241	0	0		0	60.5575	0	0		0	25.793	0	0		0	54.9504	0	0		0	39.2503	0	0		0	57.1873	0	0		0	33.6997	0	0		0	68.4205	0	0		0	35.7421	0	0
0			0		0			0		0			0		0			0		0			0		0			0		0			0		0			0		0			0		0			0
0	30.074	0	0		0	13.5026	0	0		0	60.9117	0	0		0	25.9439	0	0		0	55.2717	0	0		0	39.4798	0	0		0	57.5217	0	0		0	33.8967	0	0		0	68.8207	0	0		0	35.9511	0	0
0			0		0			0		0			0		0			0		0			0		0			0		0			0		0			0		0			0		0			0
0	30.2489	0	0		0	13.5811	0	0		0	61.2658	0	0		0	26.0947	0	0		0	55.5931	0	0		0	39.7093	0	0		0.401779	57.8562	0.694445	5.12646		0	34.0938	0	0		0	69.2208	0	0		0	36.1601	0	0
0			0		0			0		0			0		0			0		0			0		0			0		0			0		0			0		0			0		0			0
0	30.4237	0	0		0	13.6596	0	0		0	61.62	0	0		0	26.2455	0	0		0	55.9144	0	0		0	39.9389	0	0		0	58.1906	0	0		0	34.2909	0	0		0	69.6209	0	0		0	36.3691	0	0
0			0		0			0		0			0		0			0		0			0		0			0		0			0		0			0		0			0		0			0
0	30.5986	0	0		0	13.7381	0	0		0	61.9741	0	0		0	26.3964	0	0		0	56.2358	0	0		1.19549	40.1684	2.97619	21.4014		0	58.525	0	0		0	34.488	0	0		0.50015	70.021	0.714286	15.099		0.712561	36.5782	1.94805	12.8223
0			0		0			0		0			0		0			0		0			0		0			0		0			0		0			0		0			0		0			0
0	30.7734	0	0		0	13.8166	0	0		0	62.3282	0	0		0	26.5472	0	0		0	56.5571	0	0		0	40.3979	0	0		0	58.8595	0	0		0	34.685	0	0		0	70.4211	0	0		0	36.7872	0	0
0			0		0			0		0			0		0			0		0			0		0			0		0			0		0			0		0			0		0			0
0	30.9483	0	0		0	13.8951	0	0		0	62.6824	0	0		0	26.698	0	0		1.34624	56.8785	2.36686	38.7409		0	40.6275	0	0		0	59.1939	0	0		0	34.8821	0	0		0	70.8213	0	0		0	36.9962	0	0
0			0		0			0		0			0		0			0		0			0		0			0		0			0		0			0		0			0		0			0
0	31.1231	0	0		0	13.9736	0	0		0	63.0365	0	0		1.64381	26.8489	6.12245	5.95381		0	57.1998	0	0		0	40.857	0	0		0	59.5283	0	0		0	35.0792	0	0		0	71.2214	0	0		0	37.2052	0	0
0			0		0			0		0			0		0			0		0			0		0			0		0			0		0			0		0			0		0			0
0	31.298	0	0		0	14.0521	0	0		0	63.3907	0	0		0	26.9997	0	0		0	57.5211	0	0		0	41.0865	0	0		0	59.8627	0	0		0	35.2763	0	0		0	71.6215	0	0		0	37.4142	0	0
0			0		0			0		0			0		0			0		0			0		0			0		0			0		0			0		0			0		0			0
0	31.4728	0	0		0	14.1307	0	0		1.51773	63.7448	2.38095	22.7376		0	27.1506	0	0		0	57.8425	0	0		0	41.3161	0	0		0	60.1972	0	0		0	35.4733	0	0		0	72.0216	0	0		0	37.6232	0	0
0			0		0			0		0			0		0			0		0			0		0			0		0			0		0			0		0			0		0			0
0	31.6477	0	0		0	14.2092	0	0		0	64.0989	0	0		0	27.3014	0	0		0	58.1638	0	0		0	41.5456	0	0		0	60.5316	0	0		0	35.6704	0	0		0	72.4217	0	0		0	37.8323	0	0
0			0		0			0		0			0		0			0		0			0		0			0		0			0		0			0		0			0		0			0
0	31.8225	0	0		0	14.2877	0	0		0	64.4531	0	0		0	27.4522	0	0		0	58.4852	0	0		0	41.7751	0	0		0	60.866	0	0		0	35.8675	0	0		0	72.8219	0	0		0	38.0413	0	0
0			0		0			0		0			0		0			0		0			0		0			0		0			0		0			0		0			0		0			0
0	31.9974	0	0		0	14.3662	0	0		0	64.8072	0	0		0	27.6031	0	0		0	58.8065	0	0		0	42.0047	0	0		1.27501	61.2005	2.08333	11.8264		0	36.0646	0	0		1.56904	73.222	2.14286	39.2092		0	38.2503	0	0
0			0		0			0		0			0		0			0		0			0		0			0		0			0		0			0		0			0		0			0
0	32.1722	0	0		0	14.4447	0	0		0	65.1613	0	0		0	27.7539	0	0		0	59.1279	0	0		0	42.2342	0	0		0	61.5349	0	0		0	36.2616	0	0		0	73.6221	0	0		0	38.4593	0	0
0			0		0			0		0			0		0			0		0			0		0			0		0			0		0			0		0			0		0			0
0	32.3471	0	0		0	14.5232	0	0		0	65.5155	0	0		0	27.9047	0	0		0	59.4492	0	0		0	42.4637	0	0		0	61.8693	0	0		0	36.4587	0	0		0	74.0222	0	0		0	38.6683	0	0
0			0		0			0		0			0		0			0		0			0		0			0		0			0		0			0		0			0		0			0
0	32.5219	0	0		0.973445	14.6017	6.66667	3.83303		0	65.8696	0	0		0	28.0556	0	0		0	59.7706	0	0		0	42.6933	0	0		0	62.2037	0	0		2.50803	36.6558	6.84211	11.6401		0	74.4223	0	0		0	38.8773	0	0
0			0		0			0		0			0		0			0		0			0		0			0		0			0		0			0		0			0		0			0
0	32.6968	0	0		0	14.6802	0	0		0	66.2237	0	0		0	28.2064	0	0		0	60.0919	0	0		0	42.9228	0	0		0	62.5382	0	0		0	36.8529	0	0		0	74.8225	0	0		0	39.0864	0	0
0			0		0			0		0			0		0			0		0			0		0			0		0			0		0			0		0			0		0			0
0.782657	32.8716	2.38095	19.4813		0	14.7587	0	0		0	66.5779	0	0		0	28.3573	0	0		0.71495	60.4133	1.18343	16.1335		0	43.1523	0	0		0	62.8726	0	0		0	37.0499	0	0		0	75.2226	0	0		0	39.2954	0	0
0			0		0			0		0			0		0			0		0			0		0			0		0			0		0			0		0			0		0			0
0	33.0465	0	0		0	14.8372	0	0		3.18724	66.932	4.7619	36.5785		0	28.5081	0	0		0	60.7346	0	0		0	43.3819	0	0		0	63.207	0	0		0	37.247	0	0		0	75.6227	0	0		0	39.5044	0	0
0			0		0			0		0			0		0			0		0			0		0			0		0			0		0			0		0			0		0			0
0	33.2213	0	0		0	14.9157	0	0		0	67.2862	0	0		0	28.6589	0	0		0	61.056	0	0		0.778775	43.6114	1.78571	9.75515		0	63.5415	0	0		0	37.4441	0	0		0	76.0228	0	0		0.644699	39.7134	1.62338	8.2332
0			0		0			0		0			0		0			0		0			0		0			0		0			0		0			0		0			0		0			0
0	33.3962	0	0		0	14.9942	0	0		0	67.6403	0	0		0	28.8098	0	0		0	61.3773	0	0		0	43.8409	0	0		0	63.8759	0	0		0	37.6412	0	0		1.63763	76.423	2.14286	33.5606		0	39.9224	0	0
0			0		0			0		0			0		0			0		0			0		0			0		0			0		0			0		0			0		0			0
0	33.571	0	0		0	15.0727	0	0		0	67.9944	0	0		0	28.9606	0	0		0	61.6987	0	0		0	44.0705	0	0		1.78362	64.2103	2.77778	12.0361		0	37.8382	0	0		0	76.8231	0	0		0	40.1315	0	0
0			0		0			0		0			0		0			0		0			0		0			0		0			0		0			0		0			0		0			0
0	33.7459	0	0		0	15.1512	0	0		0	68.3486	0	0		0	29.1114	0	0		0	62.02	0	0		0	44.3	0	0		0	64.5447	0	0		0	38.0353	0	0		0	77.2232	0	0		0	40.3405	0	0
0			0		0			0		0			0		0			0		0			0		0			0		0			0		0			0		0			0		0			0
0	33.9207	0	0		0	15.2297	0	0		0	68.7027	0	0		0	29.2623	0	0		0	62.3414	0	0		0	44.5295	0	0		0	64.8792	0	0		0	38.2324	0	0		0	77.6233	0	0		0	40.5495	0	0
0			0		0			0		0			0		0			0		0			0		0			0		0			0		0			0		0			0		0			0
0	34.0956	0	0		0	15.3082	0	0		0	69.0568	0	0		0	29.4131	0	0		0	62.6627	0	0		0	44.7591	0	0		0	65.2136	0	0		0	38.4295	0	0		0	78.0234	0	0		0	40.7585	0	0
0			0		0			0		0			0		0			0		0			0		0			0		0			0		0			0		0			0		0			0
0	34.2704	0	0		0	15.3867	0	0		0	69.411	0	0		0	29.5639	0	0		0	62.9841	0	0		0	44.9886	0	0		0	65.548	0	0		0	38.6265	0	0		0	78.4236	0	0		0	40.9675	0	0
0			0		0			0		0			0		0			0		0			0		0			0		0			0		0			0		0			0		0			0
0	34.4453	0	0		0	15.4652	0	0		0	69.7651	0	0		0	29.7148	0	0		0	63.3054	0	0		0	45.2181	0	0		0	65.8825	0	0		0	38.8236	0	0		0	78.8237	0	0		0	41.1765	0	0
0			0		0			0		0			0		0			0		0			0		0			0		0			0		0			0		0			0		0			0
0	34.6201	0	0		0	15.5437	0	0		0	70.1193	0	0		0	29.8656	0	0		1.50596	63.6267	2.36686	26.8948		0	45.4477	0	0		0	66.2169	0	0		0	39.0207	0	0		2.26354	79.2238	2.85714	38.6377		0	41.3856	0	0
0			0		0			0		0			0		0			0		0			0		0			0		0			0		0			0		0			0		0			0
0	34.795	0	0		0	15.6222	0	0		0	70.4734	0	0		0	30.0164	0	0		0	63.9481	0	0		0	45.6772	0	0		0	66.5513	0	0		0	39.2178	0	0		0	79.6239	0	0		0	41.5946	0	0
0			0		0			0		0			0		0			0		0			0		0			0		0			0		0			0		0			0		0			0
0	34.9698	0	0		0	15.7007	0	0		0	70.8275	0	0		3.69395	30.1673	12.2449	5.24201		0	64.2694	0	0		0	45.9067	0	0		0	66.8858	0	0		0	39.4148	0	0		0	80.024	0	0		0	41.8036	0	0
0			0		0			0		0			0		0			0		0			0		0			0		0			0		0			0		0			0		0			0
0	35.1446	0	0		0	15.7792	0	0		0	71.1817	0	0		0	30.3181	0	0		0	64.5908	0	0		0	46.1363	0	0		1.86723	67.2202	2.77778	8.80705		2.08484	39.6119	5.26316	5.35523		0	80.4241	0	0		0	42.0126	0	0
0			0		0			0		0			0		0			0		0			0		0			0		0			0		0			0		0			0		0			0
0	35.3195	0	0		0	15.8577	0	0		0	71.5358	0	0		0	30.469	0	0		0	64.9121	0	0		0	46.3658	0	0		0	67.5546	0	0		0	39.809	0	0		0	80.8243	0	0		0	42.2216	0	0
0			0		0			0		0			0		0			0		0			0		0			0		0			0		0			0		0			0		0			0
0	35.4943	0	0		0	15.9362	0	0		0	71.8899	0	0		0	30.6198	0	0		0	65.2335	0	0		0	46.5953	0	0		0	67.889	0	0		0	40.0061	0	0		0	81.2244	0	0		0	42.4306	0	0
0			0		0			0		0			0		0			0		0			0		0			0		0			0		0			0		0			0		0			0
0	35.6692	0	0		0	16.0147	0	0		0	72.2441	0	0		0	30.7706	0	0		0	65.5548	0	0		0.836158	46.8249	1.78571	7.25713		0	68.2235	0	0		0	40.2031	0	0		0	81.6245	0	0		1.79973	42.6397	4.22078	16.2048
0			0		0			0		0			0		0			0		0			0		0			0		0			0		0			0		0			0		0			0
0	35.8441	0	0		0	16.0933	0	0		0	72.5982	0	0		0	30.9215	0	0		0	65.8762	0	0		0	47.0544	0	0		0	68.5579	0	0		0	40.4002	0	0		0	82.0246	0	0		0	42.8487	0	0
0			0		0			0		0			0		0			0		0			0		0			0		0			0		0			0		0			0		0			0
0	36.0189	0	0		0	16.1717	0	0		0	72.9524	0	0		0	31.0723	0	0		0	66.1975	0	0		0	47.2839	0	0		0	68.8923	0	0		0	40.5973	0	0		1.76624	82.4248	2.14286	24.153		0	43.0577	0	0
0			0		0			0		0			0		0			0		0			0		0			0		0			0		0			0		0			0		0			0
0	36.1938	0	0		0	16.2503	0	0		0	73.3065	0	0		0	31.2231	0	0		0	66.5189	0	0		0	47.5135	0	0		0	69.2268	0	0		0	40.7943	0	0		0	82.8249	0	0		0	43.2667	0	0
0			0		0			0		0			0		0			0		0			0		0			0		0			0		0			0		0			0		0			0
0	36.3686	0	0		0	16.3288	0	0		0	73.6607	0	0		0	31.374	0	0		0	66.8402	0	0		0	47.743	0	0		0	69.5612	0	0		0	40.9914	0	0		0	83.225	0	0		0	43.4757	0	0
0			0		0			0		0			0		0			0		0			0		0			0		0			0		0			0		0			0		0			0
0.870082	36.5434	2.38095	14.8009		0.546909	16.4073	3.33333	1.11246		0	74.0148	0	0		0	31.5248	0	0		0	67.1616	0	0		0	47.9725	0	0		0	69.8956	0	0		0	41.1885	0	0		0	83.6251	0	0		0	43.6848	0	0
0			0		0			0		0			0		0			0		0			0		0			0		0			0		0			0		0			0		0			0
0	36.7183	0	0		0	16.4858	0	0		0	74.3689	0	0		0	31.6757	0	0		0	67.4829	0	0		0	48.2021	0	0		1.46313	70.23	2.08333	4.56096		0	41.3856	0	0		0	84.0252	0	0		0	43.8938	0	0
0			0		0			0		0			0		0			0		0			0		0			0		0			0		0			0		0			0		0			0
0	36.8931	0	0		0	16.5643	0	0		0	74.7231	0	0		0	31.8265	0	0		0	67.8043	0	0		0	48.4316	0	0		0	70.5645	0	0		0	41.5826	0	0		0	84.4253	0	0		0	44.1028	0	0
0			0		0			0		0			0		0			0		0			0		0			0		0			0		0			0		0			0		0			0
0	37.068	0	0		0	16.6428	0	0		0	75.0772	0	0		0	31.9773	0	0		0	68.1256	0	0		0	48.6611	0	0		0	70.8989	0	0		0	41.7797	0	0		0	84.8255	0	0		0	44.3118	0	0
0			0		0			0		0			0		0			0		0			0		0			0		0			0		0			0		0			0		0			0
0	37.2428	0	0		0	16.7213	0	0		0	75.4313	0	0		0	32.1282	0	0		0	68.447	0	0		0	48.8907	0	0		0	71.2333	0	0		0	41.9768	0	0		0	85.2256	0	0		0	44.5208	0	0
0			0		0			0		0			0		0			0		0			0		0			0		0			0		0			0		0			0		0			0
0	37.4177	0	0		0	16.7998	0	0		0	75.7855	0	0		0	32.279	0	0		0	68.7683	0	0		0	49.1202	0	0		0	71.5678	0	0		0	42.1739	0	0		3.05806	85.6257	3.57143	32.9449		0	44.7298	0	0
0			0		0			0		0			0		0			0		0			0		0			0		0			0		0			0		0			0		0			0
0	37.5925	0	0		0	16.8783	0	0		0	76.1396	0	0		0	32.4298	0	0		0	69.0896	0	0		0	49.3498	0	0		0	71.9022	0	0		0	42.3709	0	0		0	86.0258	0	0		0	44.9389	0	0
0			0		0			0		0			0		0			0		0			0		0			0		0			0		0			0		0			0		0			0
0	37.7674	0	0		0	16.9568	0	0		0	76.4938	0	0		0	32.5807	0	0		0	69.411	0	0		0	49.5793	0	0		0	72.2366	0	0		0	42.568	0	0		0	86.426	0	0		0	45.1479	0	0
0			0		0			0		0			0		0			0		0			0		0			0		0			0		0			0		0			0		0			0
0	37.9422	0	0		0	17.0353	0	0		0	76.8479	0	0		0	32.7315	0	0		0	69.7323	0	0		0	49.8088	0	0		0	72.571	0	0		2.81349	42.7651	6.57895	3.16309		0	86.8261	0	0		0	45.3569	0	0
0			0		0			0		0			0		0			0		0			0		0			0		0			0		0			0		0			0		0			0
0	38.1171	0	0		0	17.1138	0	0		0	77.202	0	0		0	32.8823	0	0		0	70.0537	0	0		0	50.0384	0	0		0	72.9055	0	0		0	42.9622	0	0		0	87.2262	0	0		0	45.5659	0	0
0			0		0			0		0			0		0			0		0			0		0			0		0			0		0			0		0			0		0			0
0.911713	38.2919	2.38095	12.7977		0	17.1923	0	0		0	77.5562	0	0		0	33.0332	0	0		2.91494	70.375	4.14201	30.1077		1.79528	50.2679	3.57143	9.97987		4.06888	73.2399	5.55556	7.7176		0	43.1592	0	0		0	87.6263	0	0		2.08068	45.7749	4.54545	12.3133
0			0		0			0		0			0		0			0		0			0		0			0		0			0		0			0		0			0		0			0
0	38.4668	0	0		0	17.2708	0	0		0	77.9103	0	0		0	33.184	0	0		0	70.6964	0	0		0	50.4974	0	0		0	73.5743	0	0		0	43.3563	0	0		0	88.0264	0	0		0	45.984	0	0
0			0		0			0		0			0		0			0		0			0		0			0		0			0		0			0		0			0		0			0
0	38.6416	0	0		0	17.3493	0	0		0	78.2644	0	0		0	33.3349	0	0		0	71.0177	0	0		0	50.727	0	0		0	73.9088	0	0		0	43.5534	0	0		0	88.4266	0	0		0	46.193	0	0
0			0		0			0		0			0		0			0		0			0		0			0		0			0		0			0		0			0		0			0
0	38.8165	0	0		0	17.4278	0	0		0	78.6186	0	0		2.39184	33.4857	7.14286	0.742678		0	71.3391	0	0		0	50.9565	0	0		0	74.2432	0	0		0	43.7505	0	0		0	88.8267	0	0		0	46.402	0	0
0			0		0			0		0			0		0			0		0			0		0			0		0			0		0			0		0			0		0			0
0	38.9913	0	0		0	17.5063	0	0		0	78.9727	0	0		0	33.6365	0	0		0	71.6604	0	0		0	51.186	0	0		0	74.5776	0	0		0	43.9475	0	0		0	89.2268	0	0		0	46.611	0	0
0			0		0			0		0			0		0			0		0			0		0			0		0			0		0			0		0			0		0			0
0	39.1662	0	0		0	17.5848	0	0		0	79.3268	0	0		0	33.7874	0	0		0	71.9818	0	0		0	51.4156	0	0		0	74.912	0	0		0	44.1446	0	0		0	89.6269	0	0		0	46.82	0	0
0			0		0			0		0			0		0			0		0			0		0			0		0			0		0			0		0			0		0			0
0	39.341	0	0		0	17.6633	0	0		0	79.681	0	0		0	33.9382	0	0		0	72.3031	0	0		0	51.6451	0	0		0	75.2465	0	0		0	44.3417	0	0		0	90.027	0	0		0	47.029	0	0
0			0		0			0		0			0		0			0		0			0		0			0		0			0		0			0		0			0		0			0
0	39.5159	0	0		0	17.7418	0	0		0	80.0351	0	0		0	34.089	0	0		0	72.6245	0	0		0	51.8746	0	0		0	75.5809	0	0		0	44.5388	0	0		0	90.4271	0	0		0	47.2381	0	0
0			0		0			0		0			0		0			0		0			0		0			0		0			0		0			0		0			0		0			0
0	39.6907	0	0		0	17.8203	0	0		1.91403	80.3893	2.38095	4.84041		0	34.2399	0	0		0	72.9458	0	0		0	52.1041	0	0		0	75.9153	0	0		0	44.7358	0	0		0	90.8273	0	0		0	47.4471	0	0
0			0		0			0		0			0		0			0		0			0		0			0		0			0		0			0		0			0		0			0
0	39.8656	0	0		0	17.8988	0	0		0	80.7434	0	0		0	34.3907	0	0		0	73.2672	0	0		0	52.3337	0	0		2.11805	76.2498	2.77778	2.1396		0	44.9329	0	0		0	91.2274	0	0		0	47.6561	0	0
0			0		0			0		0			0		0			0		0			0		0			0		0			0		0			0		0			0		0			0
0.953343	40.0404	2.38095	10.9402		0	17.9773	0	0		0	81.0975	0	0		0	34.5415	0	0		0.87087	73.5885	1.18343	6.67382		0	52.5632	0	0		0	76.5842	0	0		0	45.13	0	0		1.96345	91.6275	2.14286	12.7265		0	47.8651	0	0
0			0		0			0		0			0		0			0		0			0		0			0		0			0		0			0		0			0		0			0
0	40.2153	0	0		0	18.0558	0	0		0	81.4517	0	0		0	34.6924	0	0		0	73.9099	0	0		0	52.7927	0	0		0	76.9186	0	0		0	45.327	0	0		0	92.0276	0	0		0	48.0741	0	0
0			0		0			0		0			0		0			0		0			0		0			0		0			0		0			0		0			0		0			0
0	40.3901	0	0		0	18.1343	0	0		0	81.8058	0	0		0	34.8432	0	0		0	74.2312	0	0		0	53.0223	0	0		0	77.2531	0	0		0	45.5241	0	0		0	92.4278	0	0		0	48.2832	0	0
0			0		0			0		0			0		0			0		0			0		0			0		0			0		0			0		0			0		0			0
0	40.565	0	0		1.21419	18.2128	6.66667	1.05147		0	82.1599	0	0		0	34.9941	0	0		0	74.5525	0	0		0	53.2518	0	0		0	77.5875	0	0		2.76733	45.7212	6.05263	0.957695		0	92.8279	0	0		0	48.4922	0	0
0			0		0			0		0			0		0			0		0			0		0			0		0			0		0			0		0			0		0			0
0	40.7398	0	0		0	18.2914	0	0		0	82.5141	0	0		0	35.1449	0	0		0	74.8739	0	0		0	53.4814	0	0		0	77.9219	0	0		0	45.9183	0	0		0	93.228	0	0		0	48.7012	0	0
0			0		0			0		0			0		0			0		0			0		0			0		0			0		0			0		0			0		0			0
0	40.9147	0	0		0	18.3698	0	0		0	82.8682	0	0		0	35.2957	0	0		0	75.1952	0	0		2.55766	53.7109	4.7619	8.38959		0	78.2563	0	0		0	46.1153	0	0		0	93.6281	0	0		1.90559	48.9102	3.8961	6.91624
0			0		0			0		0			0		0			0		0			0		0			0		0			0		0			0		0			0		0			0
0	41.0895	0	0		0	18.4484	0	0		0	83.2224	0	0		0	35.4466	0	0		0	75.5166	0	0		0	53.9404	0	0		0	78.5908	0	0		0	46.3124	0	0		0	94.0282	0	0		0	49.1192	0	0
0			0		0			0		0			0		0			0		0			0		0			0		0			0		0			0		0			0		0			0
0	41.2644	0	0		0	18.5269	0	0		0	83.5765	0	0		0	35.5974	0	0		0	75.8379	0	0		0	54.17	0	0		0	78.9252	0	0		0	46.5095	0	0		3.37244	94.4283	3.57143	16.6156		0	49.3282	0	0
0			0		0			0		0			0		0			0		0			0		0			0		0			0		0			0		0			0		0			0
0	41.4392	0	0		0	18.6054	0	0		3.9967	83.9306	4.7619	5.46911		0	35.7482	0	0		0	76.1593	0	0		0	54.3995	0	0		2.20166	79.2596	2.77778	0.923703		0	46.7066	0	0		0	94.8285	0	0		0	49.5373	0	0
0			0		0			0		0			0		0			0		0			0		0			0		0			0		0			0		0			0		0			0
0	41.6141	0	0		0	18.6839	0	0		0	84.2848	0	0		0	35.8991	0	0		0	76.4806	0	0		0	54.629	0	0		0	79.594	0	0		0	46.9036	0	0		0	95.2286	0	0		0	49.7463	0	0
0			0		0			0		0			0		0			0		0			0		0			0		0			0		0			0		0			0		0			0
0	41.7889	0	0		0	18.7624	0	0		0	84.6389	0	0		0	36.0499	0	0		0	76.802	0	0		0	54.8586	0	0		0	79.9285	0	0		0	47.1007	0	0		0	95.6287	0	0		0	49.9553	0	0
0			0		0			0		0			0		0			0		0			0		0			0		0			0		0			0		0			0		0			0
0	41.9638	0	0		0	18.8409	0	0		0	84.993	0	0		0	36.2007	0	0		1.36905	77.1233	1.77515	7.25232		0	55.0881	0	0		0	80.2629	0	0		0	47.2978	0	0		0	96.0288	0	0		0	50.1643	0	0
0			0		0			0		0			0		0			0		0			0		0			0		0			0		0			0		0			0		0			0
0	42.1386	0	0		0	18.9194	0	0		0	85.3472	0	0		0	36.3516	0	0		0	77.4447	0	0		0	55.3176	0	0		0	80.5973	0	0		0	47.4949	0	0		0	96.429	0	0		0	50.3733	0	0
0			0		0			0		0			0		0			0		0			0		0			0		0			0		0			0		0			0		0			0
0	42.3135	0	0		0	18.9979	0	0		0	85.7013	0	0		0	36.5024	0	0		0	77.766	0	0		0	55.5472	0	0		0	80.9318	0	0		0	47.6919	0	0		0	96.8291	0	0		0	50.5824	0	0
0			0		0			0		0			0		0			0		0			0		0			0		0			0		0			0		0			0		0			0
0	42.4883	0	0		0	19.0764	0	0		0	86.0555	0	0		0	36.6532	0	0		0	78.0874	0	0		0	55.7767	0	0		0	81.2662	0	0		0	47.889	0	0		0	97.2292	0	0		0	50.7914	0	0
0			0		0			0		0			0		0			0		0			0		0			0		0			0		0			0		0			0		0			0
0	42.6632	0	0		0	19.1549	0	0		0	86.4096	0	0		3.9433	36.8041	10.7143	0.000944415		0	78.4087	0	0		0	56.0062	0	0		0	81.6006	0	0		0	48.0861	0	0		2.09206	97.6293	2.14286	7.22994		0	51.0004	0	0
0			0		0			0		0			0		0			0		0			0		0			0		0			0		0			0		0			0		0			0
0	42.838	0	0		0	19.2334	0	0		0	86.7637	0	0		0	36.9549	0	0		0	78.7301	0	0		0	56.2358	0	0		0	81.9351	0	0		0	48.2832	0	0		0	98.0294	0	0		0	51.2094	0	0
0			0		0			0		0			0		0			0		0			0		0			0		0			0		0			0		0			0		0			0
0	43.0129	0	0		0	19.3119	0	0		2.07423	87.1179	2.38095	1.34989		0	37.1058	0	0		0	79.0514	0	0		0	56.4653	0	0		3.99921	82.2695	4.86111	0.36942		0	48.4802	0	0		0	98.4296	0	0		0	51.4184	0	0
0			0		0			0		0			0		0			0		0			0		0			0		0			0		0			0		0			0		0			0
0	43.1877	0	0		0	19.3904	0	0		0	87.472	0	0		0	37.2566	0	0		0	79.3727	0	0		0	56.6948	0	0		0	82.6039	0	0		0	48.6773	0	0		0	98.8297	0	0		0	51.6275	0	0
0			0		0			0		0			0		0			0		0			0		0			0		0			0		0			0		0			0		0			0
0	43.3626	0	0		0	19.4689	0	0		0	87.8262	0	0		0	37.4074	0	0		0	79.6941	0	0		2.37185	56.9244	4.16667	4.21671		0	82.9383	0	0		3.21542	48.8744	6.57895	0.0447343		0	99.2298	0	0		2.8611	51.8365	5.51948	5.96676
0			0		0			0		0			0		0			0		0			0		0			0		0			0		0			0		0			0		0			0
0	43.5374	0	0		0	19.5474	0	0		0	88.1803	0	0		0	37.5583	0	0		0	80.0155	0	0		0	57.1539	0	0		0	83.2728	0	0		0	49.0714	0	0		0	99.6299	0	0		0	52.0455	0	0
0			0		0			0		0			0		0			0		0			0		0			0		0			0		0			0		0			0		0			0
0	43.7123	0	0		0	19.6259	0	0		0	88.5344	0	0		0	37.7091	0	0		0.950731	80.3368	1.18343	3.41975		0	57.3834	0	0		0	83.6072	0	0		0	49.2685	0	0		0	100.03	0	0		0	52.2545	0	0
0			0		0			0		0			0		0			0		0			0		0			0		0			0		0			0		0			0		0			0
0	43.8871	0	0		0	19.7044	0	0		0	88.8886	0	0		0	37.8599	0	0		0	80.6581	0	0		0	57.613	0	0		0	83.9416	0	0		0	49.4656	0	0		0	100.43	0	0		0	52.4635	0	0
0			0		0			0		0			0		0			0		0			0		0			0		0			0		0			0		0			0		0			0
0	44.062	0	0		0	19.7829	0	0		0	89.2427	0	0		0	38.0108	0	0		0	80.9795	0	0		0	57.8425	0	0		0	84.276	0	0		0	49.6627	0	0		2.88087	100.83	2.85714	6.57285		0	52.6725	0	0
0			0		0			0		0			0		0			0		0			0		0			0		0			0		0			0		0			0		0			0
0	44.2368	0	0		0	19.8614	0	0		0	89.5968	0	0		0	38.1616	0	0		0	81.3008	0	0		0	58.072	0	0		0	84.6105	0	0		0	49.8597	0	0		0	101.23	0	0		0	52.8815	0	0
0			0		0			0		0			0		0			0		0			0		0			0		0			0		0			0		0			0		0			0
0	44.4117	0	0		0	19.9399	0	0		0	89.951	0	0		0	38.3125	0	0		0	81.6222	0	0		0	58.3016	0	0		0	84.9449	0	0		0	50.0568	0	0		0	101.63	0	0		0	53.0906	0	0
0			0		0			0		0			0		0			0		0			0		0			0		0			0		0			0		0			0		0			0
0	44.5865	0	0		0.889708	20.0184	4.44444	0.20848		0	90.3051	0	0		0	38.4633	0	0		0	81.9435	0	0		0	58.5311	0	0		0	85.2793	0	0		0	50.2539	0	0		0	102.031	0	0		0	53.2996	0	0
0			0		0			0		0			0		0			0		0			0		0			0		0			0		0			0		0			0		0			0
0	44.7614	0	0		0	20.0969	0	0		0	90.6593	0	0		0	38.6141	0	0		0	82.2649	0	0		0	58.7606	0	0		3.56724	85.6138	4.16667	0.0143851		0	50.451	0	0		0	102.431	0	0		0	53.5086	0	0
0			0		0			0		0			0		0			0		0			0		0			0		0			0		0			0		0			0		0			0
0	44.9362	0	0		0	20.1754	0	0		0	91.0134	0	0		0	38.765	0	0		0	82.5862	0	0		0	58.9902	0	0		0	85.9482	0	0		0	50.648	0	0		0	102.831	0	0		0	53.7176	0	0
0			0		0			0		0			0		0			0		0			0		0			0		0			0		0			0		0			0		0			0
0	45.111	0	0		0	20.2539	0	0		0	91.3675	0	0		0	38.9158	0	0		0	82.9076	0	0		0	59.2197	0	0		0	86.2826	0	0		0	50.8451	0	0		0	103.231	0	0		0	53.9266	0	0
0			0		0			0		0			0		0			0		0			0		0			0		0			0		0			0		0			0		0			0
0	45.2859	0	0		0	20.3325	0	0		0	91.7217	0	0		0	39.0666	0	0		0	83.2289	0	0		0	59.4492	0	0		0	86.6171	0	0		0	51.0422	0	0		5.92178	103.631	5.71429	8.739		0	54.1357	0	0
0			0		0			0		0			0		0			0		0			0		0			0		0			0		0			0		0			0		0			0
0	45.4607	0	0		0	20.4109	0	0		0	92.0758	0	0		0	39.2175	0	0		0	83.5503	0	0		0	59.6788	0	0		0	86.9515	0	0		0	51.2393	0	0		0	104.031	0	0		0	54.3447	0	0
0			0		0			0		0			0		0			0		0			0		0			0		0			0		0			0		0			0		0			0
0	45.6356	0	0		0	20.4895	0	0		0	92.43	0	0		0	39.3683	0	0		2.48141	83.8716	2.95858	5.36349		0	59.9083	0	0		0	87.2859	0	0		0	51.4363	0	0		0	104.431	0	0		0	54.5537	0	0
0			0		0			0		0			0		0			0		0			0		0			0		0			0		0			0		0			0		0			0
0	45.8104	0	0		0	20.568	0	0		0	92.7841	0	0		0	39.5192	0	0		0	84.193	0	0		0	60.1378	0	0		0	87.6203	0	0		0	51.6334	0	0		0	104.832	0	0		0	54.7627	0	0
0			0		0			0		0			0		0			0		0			0		0			0		0			0		0			0		0			0		0			0
0	45.9853	0	0		0	20.6465	0	0		0	93.1382	0	0		0	39.67	0	0		0	84.5143	0	0		3.23397	60.3674	5.35714	2.34551		0	87.9548	0	0		3.95548	51.8305	7.63158	0.346729		0	105.232	0	0		1.96328	54.9717	3.57143	1.88346
0			0		0			0		0			0		0			0		0			0		0			0		0			0		0			0		0			0		0			0
0	46.1601	0	0		0	20.725	0	0		0	93.4924	0	0		0	39.8208	0	0		0	84.8357	0	0		0	60.5969	0	0		0	88.2892	0	0		0	52.0276	0	0		0	105.632	0	0		0	55.1808	0	0
0			0		0			0		0			0		0			0		0			0		0			0		0			0		0			0		0			0		0			0
0	46.335	0	0		0	20.8035	0	0		0	93.8465	0	0		0	39.9717	0	0		0	85.157	0	0		0	60.8264	0	0		8.61619	88.6236	9.72222	1.2582		0	52.2246	0	0		0	106.032	0	0		0	55.3898	0	0
0			0		0			0		0			0		0			0		0			0		0			0		0			0		0			0		0			0		0			0
0	46.5098	0	0		0	20.882	0	0		0	94.2006	0	0		0	40.1225	0	0		0	85.4784	0	0		0	61.056	0	0		0	88.9581	0	0		0	52.4217	0	0		0	106.432	0	0		0	55.5988	0	0
0			0		0			0		0			0		0			0		0			0		0			0		0			0		0			0		0			0		0			0
0	46.6847	0	0		0	20.9605	0	0		0	94.5548	0	0		3.08214	40.2733	7.65306	0.971622		0	85.7997	0	0		0	61.2855	0	0		0	89.2925	0	0		0	52.6188	0	0		4.57852	106.832	4.28571	3.60034		0	55.8078	0	0
0			0		0			0		0			0		0			0		0			0		0			0		0			0		0			0		0			0		0			0
0	46.8595	0	0		0	21.039	0	0		0	94.9089	0	0		0	40.4242	0	0		0	86.121	0	0		0	61.515	0	0		0	89.6269	0	0		0	52.8159	0	0		0	107.232	0	0		0	56.0168	0	0
0			0		0			0		0			0		0			0		0			0		0			0		0			0		0			0		0			0		0			0
0	47.0344	0	0		0	21.1175	0	0		0	95.2631	0	0		0	40.575	0	0		0	86.4424	0	0		0	61.7446	0	0		0	89.9613	0	0		0	53.0129	0	0		0	107.632	0	0		0	56.2258	0	0
0			0		0			0		0			0		0			0		0			0		0			0		0			0		0			0		0			0		0			0
0	47.2092	0	0		0	21.196	0	0		0	95.6172	0	0		0	40.7258	0	0		0	86.7637	0	0		0	61.9741	0	0		0	90.2958	0	0		0	53.21	0	0		0	108.032	0	0		0	56.4349	0	0
0			0		0			0		0			0		0			0		0			0		0			0		0			0		0			0		0			0		0			0
0	47.3841	0	0		0	21.2745	0	0		0	95.9713	0	0		0	40.8767	0	0		2.57648	87.0851	2.95858	3.10883		0	62.2036	0	0		0	90.6302	0	0		0	53.4071	0	0		0	108.433	0	0		0	56.6439	0	0
0			0		0			0		0			0		0			0		0			0		0			0		0			0		0			0		0			0		0			0
0	47.5589	0	0		0	21.353	0	0		0	96.3255	0	0		0	41.0275	0	0		0	87.4064	0	0		0	62.4332	0	0		0	90.9646	0	0		0	53.6042	0	0		0	108.833	0	0		0	56.8529	0	0
0			0		0			0		0			0		0			0		0			0		0			0		0			0		0			0		0			0		0			0
0	47.7338	0	0		0	21.4315	0	0		0	96.6796	0	0		0	41.1784	0	0		0	87.7278	0	0		0	62.6627	0	0		0	91.299	0	0		0	53.8012	0	0		0	109.233	0	0		0	57.0619	0	0
0			0		0			0		0			0		0			0		0			0		0			0		0			0		0			0		0			0		0			0
0	47.9086	0	0		0	21.51	0	0		4.62065	97.0337	4.7619	0.271146		0	41.3292	0	0		0	88.0491	0	0		0	62.8922	0	0		3.81806	91.6335	4.16667	1.81901		0	53.9983	0	0		0	109.633	0	0		0	57.2709	0	0
0			0		0			0		0			0		0			0		0			0		0			0		0			0		0			0		0			0		0			0
0	48.0835	0	0		0	21.5885	0	0		0	97.3879	0	0		0	41.48	0	0		0	88.3705	0	0		0	63.1218	0	0		0	91.9679	0	0		0	54.1954	0	0		2.35785	110.033	2.14286	0.762374		0	57.48	0	0
0			0		0			0		0			0		0			0		0			0		0			0		0			0		0			0		0			0		0			0
0	48.2583	0	0		0	21.667	0	0		0	97.742	0	0		0	41.6309	0	0		0	88.6918	0	0		0	63.3513	0	0		0	92.3023	0	0		0	54.3924	0	0		0	110.433	0	0		0	57.689	0	0
0			0		0			0		0			0		0			0		0			0		0			0		0			0		0			0		0			0		0			0
0	48.4332	0	0		0	21.7455	0	0		0	98.0961	0	0		0	41.7817	0	0		0	89.0132	0	0		3.78457	63.5808	5.95238	0.689467		0	92.6368	0	0		0	54.5895	0	0		0	110.833	0	0		2.25577	57.898	3.8961	0.732425
0			0		0			0		0			0		0			0		0			0		0			0		0			0		0			0		0			0		0			0
0	48.608	0	0		0	21.824	0	0		0	98.4503	0	0		0	41.9325	0	0		0	89.3345	0	0		0	63.8104	0	0		0	92.9712	0	0		0	54.7866	0	0		0	111.233	0	0		0	58.107	0	0
0			0		0			0		0			0		0			0		0			0		0			0		0			0		0			0		0			0		0			0
0	48.7829	0	0		1.21681	21.9025	5.55556	0.00440976		0	98.8044	0	0		0	42.0834	0	0		0	89.6559	0	0		0	64.0399	0	0		0	93.3056	0	0		4.7749	54.9837	8.68421	2.42533		0	111.633	0	0		0	58.316	0	0
0			0		0			0		0			0		0			0		0			0		0			0		0			0		0			0		0			0		0			0
0	48.9577	0	0		0	21.981	0	0		0	99.1586	0	0		0	42.2342	0	0		0	89.9772	0	0		0	64.2694	0	0		0	93.6401	0	0		0	55.1808	0	0		0	112.034	0	0		0	58.525	0	0
0			0		0			0		0			0		0			0		0			0		0			0		0			0		0			0		0			0		0			0
0	49.1326	0	0		0	22.0595	0	0		0	99.5127	0	0		0	42.385	0	0		0	90.2986	0	0		0	64.499	0	0		0	93.9745	0	0		0	55.3778	0	0		0	112.434	0	0		0	58.7341	0	0
0			0		0			0		0			0		0			0		0			0		0			0		0			0		0			0		0			0		0			0
0	49.3074	0	0		0	22.138	0	0		0	99.8668	0	0		0	42.5359	0	0		3.21728	90.6199	3.5503	1.60133		0	64.7285	0	0		0	94.3089	0	0		0	55.5749	0	0		0	112.834	0	0		0	58.9431	0	0
0			0		0			0		0			0		0			0		0			0		0			0		0			0		0			0		0			0		0			0
0	49.4823	0	0		0	22.2165	0	0		0	100.221	0	0		0	42.6867	0	0		0	90.9413	0	0		0	64.958	0	0		5.91521	94.6433	6.25	5.78059		0	55.772	0	0		0	113.234	0	0		0	59.1521	0	0
0			0		0			0		0			0		0			0		0			0		0			0		0			0		0			0		0			0		0			0
0	49.6571	0	0		0	22.295	0	0		0	100.575	0	0		0	42.8376	0	0		0	91.2626	0	0		0	65.1876	0	0		0	94.9778	0	0		0	55.9691	0	0		0	113.634	0	0		0	59.3611	0	0
0			0		0			0		0			0		0			0		0			0		0			0		0			0		0			0		0			0		0			0
0	49.832	0	0		0	22.3735	0	0		0	100.929	0	0		0	42.9884	0	0		0	91.584	0	0		0	65.4171	0	0		0	95.3122	0	0		0	56.1661	0	0		0	114.034	0	0		0	59.5701	0	0
0			0		0			0		0			0		0			0		0			0		0			0		0			0		0			0		0			0		0			0
0	50.0068	0	0		0	22.452	0	0		0	101.283	0	0		0	43.1392	0	0		0	91.9053	0	0		0	65.6466	0	0		0	95.6466	0	0		0	56.3632	0	0		0	114.434	0	0		0	59.7791	0	0
0			0		0			0		0			0		0			0		0			0		0			0		0			0		0			0		0			0		0			0
0	50.1817	0	0		0	22.5305	0	0		0	101.638	0	0		0	43.2901	0	0		0	92.2267	0	0		0	65.8762	0	0		0	95.981	0	0		0	56.5603	0	0		0	114.835	0	0		0	59.9882	0	0
0			0		0			0		0			0		0			0		0			0		0			0		0			0		0			0		0			0		0			0
0	50.3565	0	0		0	22.609	0	0		0	101.992	0	0		0	43.4409	0	0		0	92.548	0	0		0	66.1057	0	0		0	96.3155	0	0		0	56.7573	0	0		0	115.235	0	0		0	60.1972	0	0
0			0		0			0		0			0		0			0		0			0		0			0		0			0		0			0		0			0		0			0
0	50.5314	0	0		0	22.6876	0	0		0	102.346	0	0		3.78092	43.5917	8.67347	4.10736		0	92.8693	0	0		0	66.3352	0	0		0	96.6499	0	0		0	56.9544	0	0		0	115.635	0	0		0	60.4062	0	0
0			0		0			0		0			0		0			0		0			0		0			0		0			0		0			0		0			0		0			0
0	50.7062	0	0		0	22.7661	0	0		0	102.7	0	0		0	43.7426	0	0		0	93.1907	0	0		0	66.5648	0	0		0	96.9843	0	0		0	57.1515	0	0		4.1441	116.035	3.57143	4.9197e-05		0	60.6152	0	0
0			0		0			0		0			0		0			0		0			0		0			0		0			0		0			0		0			0		0			0
0	50.8811	0	0		0	22.8446	0	0		0	103.054	0	0		0	43.8934	0	0		0	93.512	0	0		0	66.7943	0	0		0	97.3188	0	0		0	57.3486	0	0		0	116.435	0	0		0	60.8242	0	0
0			0		0			0		0			0		0			0		0			0		0			0		0			0		0			0		0			0		0			0
2.43123	51.0559	4.7619	5.17048		0	22.9231	0	0		0	103.408	0	0		0	44.0442	0	0		2.77614	93.8334	2.95858	0.362943		3.59056	67.0238	5.35714	8.40662e-05		7.45962	97.6532	7.63889	12.1795		0	57.5456	0	0		0	116.835	0	0		3.9632	61.0333	6.49351	0.0935844
0			0		0			0		0			0		0			0		0			0		0			0		0			0		0			0		0			0		0			0
0	51.2308	0	0		0	23.0016	0	0		2.47053	103.762	2.38095	1.97808		0	44.1951	0	0		0	94.1547	0	0		0	67.2534	0	0		0	97.9876	0	0		0	57.7427	0	0		0	117.235	0	0		0	61.2423	0	0
0			0		0			0		0			0		0			0		0			0		0			0		0			0		0			0		0			0		0			0
0	51.4056	0	0		0	23.0801	0	0		0	104.117	0	0		0	44.3459	0	0		0	94.4761	0	0		0	67.4829	0	0		0	98.3221	0	0		3.65935	57.9398	6.31579	4.28911		0	117.635	0	0		0	61.4513	0	0
0			0		0			0		0			0		0			0		0			0		0			0		0			0		0			0		0			0		0			0
0	51.5805	0	0		0	23.1586	0	0		0	104.471	0	0		0	44.4967	0	0		0	94.7974	0	0		0	67.7125	0	0		0	98.6565	0	0		0	58.1369	0	0		0	118.035	0	0		0	61.6603	0	0
0			0		0			0		0			0		0			0		0			0		0			0		0			0		0			0		0			0		0			0
0	51.7553	0	0		0	23.2371	0	0		0	104.825	0	0		0	44.6476	0	0		0	95.1188	0	0		0	67.942	0	0		0	98.9909	0	0		0	58.3339	0	0		0	118.436	0	0		0	61.8693	0	0
0			0		0			0		0			0		0			0		0			0		0			0		0			0		0			0		0			0		0			0
0	51.9302	0	0		0	23.3156	0	0		0	105.179	0	0		0	44.7984	0	0		0	95.4401	0	0		0	68.1715	0	0		0	99.3253	0	0		0	58.531	0	0		3.39531	118.836	2.85714	0.230124		0	62.0784	0	0
0			0		0			0		0			0		0			0		0			0		0			0		0			0		0			0		0			0		0			0
0	52.105	0	0		0	23.3941	0	0		0	105.533	0	0		0	44.9493	0	0		0	95.7615	0	0		0	68.401	0	0		0	99.6598	0	0		0	58.7281	0	0		0	119.236	0	0		0	62.2874	0	0
0			0		0			0		0			0		0			0		0			0		0			0		0			0		0			0		0			0		0			0
0	52.2799	0	0		0	23.4726	0	0		0	105.887	0	0		0	45.1001	0	0		0	96.0828	0	0		0	68.6306	0	0		0	99.9942	0	0		0	58.9252	0	0		0	119.636	0	0		0	62.4964	0	0
0			0		0			0		0			0		0			0		0			0		0			0		0			0		0			0		0			0		0			0
0	52.4547	0	0		0	23.5511	0	0		0	106.241	0	0		0	45.2509	0	0		0	96.4042	0	0		0	68.8601	0	0		0	100.329	0	0		0	59.1222	0	0		0	120.036	0	0		0	62.7054	0	0
0			0		0			0		0			0		0			0		0			0		0			0		0			0		0			0		0			0		0			0
0	52.6296	0	0		0	23.6296	0	0		0	106.596	0	0		0	45.4018	0	0		0	96.7255	0	0		0	69.0897	0	0		2.7962	100.663	2.77778	6.79202		0	59.3193	0	0		0	120.436	0	0		0	62.9144	0	0
0			0		0			0		0			0		0			0		0			0		0			0		0			0		0			0		0			0		0			0
1.25725	52.8044	2.38095	1.79043		2.37081	23.7081	10	0.23221		0	106.95	0	0		0	45.5526	0	0		2.29697	97.0468	2.36686	0.00197728		0	69.3192	0	0		0	100.998	0	0		0	59.5164	0	0		0	120.836	0	0		0	63.1234	0	0
0			0		0			0		0			0		0			0		0			0		0			0		0			0		0			0		0			0		0			0
0	52.9793	0	0		0	23.7866	0	0		12.7742	107.304	11.9048	19.069		0	45.7034	0	0		0	97.3682	0	0		0	69.5487	0	0		0	101.332	0	0		0	59.7135	0	0		0	121.236	0	0		0	63.3325	0	0
0			0		0			0		0			0		0			0		0			0		0			0		0			0		0			0		0			0		0			0
0	53.1541	0	0		0	23.8651	0	0		0	107.658	0	0		0	45.8543	0	0		0	97.6895	0	0		0	69.7782	0	0		0	101.666	0	0		0	59.9105	0	0		0	121.636	0	0		0	63.5415	0	0
0			0		0			0		0			0		0			0		0			0		0			0		0			0		0			0		0			0		0			0
0	53.3289	0	0		0	23.9436	0	0		0	108.012	0	0		0	46.0051	0	0		0	98.0109	0	0		0	70.0078	0	0		0	102.001	0	0		0	60.1076	0	0		4.35845	122.037	3.57143	1.30245		0	63.7505	0	0
0			0		0			0		0			0		0			0		0			0		0			0		0			0		0			0		0			0		0			0
0	53.5038	0	0		0	24.0221	0	0		0	108.366	0	0		0	46.1559	0	0		0	98.3322	0	0		0	70.2373	0	0		0	102.335	0	0		0	60.3047	0	0		0	122.437	0	0		0	63.9595	0	0
0			0		0			0		0			0		0			0		0			0		0			0		0			0		0			0		0			0		0			0
0	53.6786	0	0		0	24.1006	0	0		0	108.72	0	0		0	46.3068	0	0		0	98.6536	0	0		5.03335	70.4668	7.14286	0.866333		0	102.67	0	0		0	60.5018	0	0		0	122.837	0	0		7.08354	64.1685	11.039	0.413225
0			0		0			0		0			0		0			0		0			0		0			0		0			0		0			0		0			0		0			0
0	53.8535	0	0		0	24.1791	0	0		0	109.074	0	0		0	46.4576	0	0		0	98.9749	0	0		0	70.6964	0	0		0	103.004	0	0		0	60.6988	0	0		0	123.237	0	0		0	64.3775	0	0
0			0		0			0		0			0		0			0		0			0		0			0		0			0		0			0		0			0		0			0
0	54.0284	0	0		0	24.2576	0	0		0	109.429	0	0		0	46.6085	0	0		0	99.2963	0	0		0	70.9259	0	0		0	103.338	0	0		0	60.8959	0	0		0	123.637	0	0		0	64.5866	0	0
0			0		0			0		0			0		0			0		0			0		0			0		0			0		0			0		0			0		0			0
0	54.2032	0	0		0	24.3361	0	0		0	109.783	0	0		0	46.7593	0	0		0	99.6176	0	0		0	71.1555	0	0		5.03965	103.673	4.86111	16.9021		4.01928	61.093	6.57895	8.54101		0	124.037	0	0		0	64.7956	0	0
0			0		0			0		0			0		0			0		0			0		0			0		0			0		0			0		0			0		0			0
0	54.3781	0	0		0	24.4146	0	0		0	110.137	0	0		4.54741	46.9101	9.69388	10.0854		0	99.939	0	0		0	71.385	0	0		0	104.007	0	0		0	61.2901	0	0		0	124.437	0	0		0	65.0046	0	0
0			0		0			0		0			0		0			0		0			0		0			0		0			0		0			0		0			0		0			0
0	54.5529	0	0		0	24.4931	0	0		2.63074	110.491	2.38095	5.97658		0	47.061	0	0		0	100.26	0	0		0	71.6145	0	0		0	104.342	0	0		0	61.4871	0	0		0	124.838	0	0		0	65.2136	0	0
0			0		0			0		0			0		0			0		0			0		0			0		0			0		0			0		0			0		0			0
2.60608	54.7277	4.7619	2.16858		0	24.5716	0	0		0	110.845	0	0		0	47.2118	0	0		4.76126	100.582	4.73373	0.498717		0	71.844	0	0		0	104.676	0	0		0	61.6842	0	0		5.36733	125.238	4.28571	3.65897		0	65.4226	0	0
0			0		0			0		0			0		0			0		0			0		0			0		0			0		0			0		0			0		0			0
0	54.9026	0	0		0	24.6501	0	0		0	111.199	0	0		0	47.3626	0	0		0	100.903	0	0		0	72.0736	0	0		0	105.011	0	0		0	61.8813	0	0		0	125.638	0	0		0	65.6317	0	0
0			0		0			0		0			0		0			0		0			0		0			0		0			0		0			0		0			0		0			0
0	55.0774	0	0		0	24.7286	0	0		0	111.553	0	0		0	47.5135	0	0		0	101.224	0	0		0	72.3031	0	0		0	105.345	0	0		0	62.0784	0	0		0	126.038	0	0		0	65.8407	0	0
0			0		0			0		0			0		0			0		0			0		0			0		0			0		0			0		0			0		0			0
0	55.2523	0	0		0	24.8072	0	0		0	111.907	0	0		0	47.6643	0	0		0	101.546	0	0		0	72.5327	0	0		0	105.68	0	0		0	62.2754	0	0		0	126.438	0	0		0	66.0497	0	0
0			0		0			0		0			0		0			0		0			0		0			0		0			0		0			0		0			0		0			0
0	55.4271	0	0		0	24.8857	0	0		0	112.262	0	0		0	47.8152	0	0		0	101.867	0	0		0	72.7622	0	0		0	106.014	0	0		0	62.4725	0	0		0	126.838	0	0		0	66.2587	0	0
0			0		0			0		0			0		0			0		0			0		0			0		0			0		0			0		0			0		0			0
0	55.602	0	0		0	24.9642	0	0		0	112.616	0	0		0	47.966	0	0		0	102.188	0	0		0	72.9917	0	0		0	106.348	0	0		0	62.6696	0	0		0	127.238	0	0		0	66.4677	0	0
0			0		0			0		0			0		0			0		0			0		0			0		0			0		0			0		0			0		0			0
0	55.7768	0	0		0	25.0427	0	0		0	112.97	0	0		0	48.1168	0	0		0	102.51	0	0		0	73.2213	0	0		4.44512	106.683	4.16667	19.542		0	62.8666	0	0		0	127.638	0	0		0	66.6767	0	0
0			0		0			0		0			0		0			0		0			0		0			0		0			0		0			0		0			0		0			0
0	55.9517	0	0		0	25.1212	0	0		0	113.324	0	0		0	48.2677	0	0		0	102.831	0	0		0	73.4508	0	0		0	107.017	0	0		0	63.0637	0	0		4.5728	128.038	3.57143	5.1779		0	66.8858	0	0
0			0		0			0		0			0		0			0		0			0		0			0		0			0		0			0		0			0		0			0
0	56.1265	0	0		0	25.1997	0	0		0	113.678	0	0		0	48.4185	0	0		0	103.152	0	0		3.07001	73.6803	4.16667	1.86824		0	107.352	0	0		0	63.2608	0	0		0	128.439	0	0		5.66384	67.0948	8.44156	1.9947
0			0		0			0		0			0		0			0		0			0		0			0		0			0		0			0		0			0		0			0
0	56.3014	0	0		0	25.2782	0	0		2.71505	114.032	2.38095	8.94691		0	48.5693	0	0		0	103.474	0	0		0	73.9099	0	0		0	107.686	0	0		0	63.4579	0	0		0	128.839	0	0		0	67.3038	0	0
0			0		0			0		0			0		0			0		0			0		0			0		0			0		0			0		0			0		0			0
0	56.4762	0	0		0	25.3567	0	0		0	114.386	0	0		0	48.7202	0	0		6.14172	103.795	5.91716	2.46873		0	74.1394	0	0		0	108.02	0	0		0	63.6549	0	0		0	129.239	0	0		0	67.5128	0	0
0			0		0			0		0			0		0			0		0			0		0			0		0			0		0			0		0			0		0			0
0	56.6511	0	0		0	25.4352	0	0		0	114.741	0	0		0	48.871	0	0		0	104.117	0	0		0	74.3689	0	0		0	108.355	0	0		0	63.852	0	0		0	129.639	0	0		0	67.7218	0	0
0			0		0			0		0			0		0			0		0			0		0			0		0			0		0			0		0			0		0			0
0	56.8259	0	0		3.40182	25.5137	13.3333	1.47801		0	115.095	0	0		0	49.0218	0	0		0	104.438	0	0		0	74.5984	0	0		0	108.689	0	0		2.19115	64.0491	3.42105	7.04482		0	130.039	0	0		0	67.9308	0	0
0			0		0			0		0			0		0			0		0			0		0			0		0			0		0			0		0			0		0			0
0	57.0008	0	0		0	25.5922	0	0		0	115.449	0	0		0	49.1727	0	0		0	104.759	0	0		0	74.828	0	0		0	109.024	0	0		0	64.2462	0	0		0	130.439	0	0		0	68.1399	0	0
0			0		0			0		0			0		0			0		0			0		0			0		0			0		0			0		0			0		0			0
0	57.1756	0	0		0	25.6707	0	0		0	115.803	0	0		0	49.3235	0	0		0	105.081	0	0		0	75.0575	0	0		0	109.358	0	0		0	64.4432	0	0		0	130.839	0	0		0	68.3489	0	0
0			0		0			0		0			0		0			0		0			0		0			0		0			0		0			0		0			0		0			0
0	57.3505	0	0		0	25.7492	0	0		0	116.157	0	0		0	49.4744	0	0		0	105.402	0	0		0	75.287	0	0		0	109.693	0	0		0	64.6403	0	0		2.81227	131.239	2.14286	4.97807		0	68.5579	0	0
0			0		0			0		0			0		0			0		0			0		0			0		0			0		0			0		0			0		0			0
0	57.5253	0	0		0	25.8277	0	0		0	116.511	0	0		0	49.6252	0	0		0	105.723	0	0		0	75.5166	0	0		3.05631	110.027	2.77778	17.3624		0	64.8374	0	0		0	131.639	0	0		0	68.7669	0	0
0			0		0			0		0			0		0			0		0			0		0			0		0			0		0			0		0			0		0			0
0	57.7002	0	0		0	25.9062	0	0		0	116.865	0	0		0	49.776	0	0		0	106.045	0	0		0	75.7461	0	0		0	110.362	0	0		0	65.0345	0	0		0	132.04	0	0		0	68.9759	0	0
0			0		0			0		0			0		0			0		0			0		0			0		0			0		0			0		0			0		0			0
0	57.875	0	0		0	25.9847	0	0		2.79094	117.22	2.38095	12.1309		0	49.9269	0	0		0	106.366	0	0		0	75.9757	0	0		0	110.696	0	0		0	65.2315	0	0		0	132.44	0	0		0	69.185	0	0
0			0		0			0		0			0		0			0		0			0		0			0		0			0		0			0		0			0		0			0
0	58.0499	0	0		0	26.0632	0	0		0	117.574	0	0		0	50.0777	0	0		0	106.687	0	0		0	76.2052	0	0		0	111.03	0	0		0	65.4286	0	0		0	132.84	0	0		0	69.394	0	0
0			0		0			0		0			0		0			0		0			0		0			0		0			0		0			0		0			0		0			0
0	58.2247	0	0		0	26.1417	0	0		0	117.928	0	0		2.30641	50.2285	4.59184	8.39137		0	107.009	0	0		0	76.4347	0	0		0	111.365	0	0		0	65.6257	0	0		0	133.24	0	0		0	69.603	0	0
0			0		0			0		0			0		0			0		0			0		0			0		0			0		0			0		0			0		0			0
4.1714	58.3996	7.14286	0.676066		0	26.2202	0	0		0	118.282	0	0		0	50.3794	0	0		6.35089	107.33	5.91716	5.91021		0	76.6643	0	0		0	111.699	0	0		0	65.8227	0	0		0	133.64	0	0		0	69.812	0	0
0			0		0			0		0			0		0			0		0			0		0			0		0			0		0			0		0			0		0			0
0	58.5744	0	0		0	26.2987	0	0		0	118.636	0	0		0	50.5302	0	0		0	107.651	0	0		0	76.8938	0	0		0	112.034	0	0		0	66.0198	0	0		0	134.04	0	0		0	70.021	0	0
0			0		0			0		0			0		0			0		0			0		0			0		0			0		0			0		0			0		0			0
0	58.7493	0	0		0	26.3772	0	0		0	118.99	0	0		0	50.681	0	0		0	107.973	0	0		5.50881	77.1233	7.14286	7.34296		0	112.368	0	0		0	66.2169	0	0		1.92058	134.44	1.42857	4.85905		3.19228	70.2301	4.54545	2.9064
0			0		0			0		0			0		0			0		0			0		0			0		0			0		0			0		0			0		0			0
0	58.9241	0	0		0	26.4557	0	0		0	119.344	0	0		0	50.8319	0	0		0	108.294	0	0		0	77.3529	0	0		0	112.703	0	0		0	66.414	0	0		0	134.84	0	0		0	70.4391	0	0
0			0		0			0		0			0		0			0		0			0		0			0		0			0		0			0		0			0		0			0
0	59.099	0	0		0	26.5342	0	0		0	119.698	0	0		0	50.9827	0	0		0	108.615	0	0		0	77.5824	0	0		3.13991	113.037	2.77778	21.7944		0	66.6111	0	0		0	135.241	0	0		0	70.6481	0	0
0			0		0			0		0			0		0			0		0			0		0			0		0			0		0			0		0			0		0			0
0	59.2738	0	0		0	26.6127	0	0		0	120.053	0	0		0	51.1335	0	0		0	108.937	0	0		0	77.8119	0	0		0	113.371	0	0		0	66.8081	0	0		0	135.641	0	0		0	70.8571	0	0
0			0		0			0		0			0		0			0		0			0		0			0		0			0		0			0		0			0		0			0
0	59.4487	0	0		0	26.6912	0	0		0	120.407	0	0		0	51.2844	0	0		0	109.258	0	0		0	78.0415	0	0		0	113.706	0	0		0	67.0052	0	0		0	136.041	0	0		0	71.0661	0	0
0			0		0			0		0			0		0			0		0			0		0			0		0			0		0			0		0			0		0			0
0	59.6235	0	0		0	26.7697	0	0		0	120.761	0	0		0	51.4352	0	0		0	109.579	0	0		0	78.271	0	0		0	114.04	0	0		2.65272	67.2023	3.94737	12.0934		0	136.441	0	0		0	71.2751	0	0
0			0		0			0		0			0		0			0		0			0		0			0		0			0		0			0		0			0		0			0
0	59.7984	0	0		0	26.8483	0	0		0	121.115	0	0		0	51.5861	0	0		0	109.901	0	0		0	78.5005	0	0		0	114.375	0	0		0	67.3993	0	0		0	136.841	0	0		0	71.4842	0	0
0			0		0			0		0			0		0			0		0			0		0			0		0			0		0			0		0			0		0			0
0	59.9732	0	0		0	26.9267	0	0		0	121.469	0	0		0	51.7369	0	0		0	110.222	0	0		0	78.7301	0	0		0	114.709	0	0		0	67.5964	0	0		4.90147	137.241	3.57143	16.1174		0	71.6932	0	0
0			0		0			0		0			0		0			0		0			0		0			0		0			0		0			0		0			0		0			0
2.86419	60.1481	4.7619	0.0839817		0	27.0053	0	0		0	121.823	0	0		0	51.8877	0	0		2.61641	110.543	2.36686	4.12873		0	78.9596	0	0		0	115.043	0	0		0	67.7935	0	0		0	137.641	0	0		0	71.9022	0	0
0			0		0			0		0			0		0			0		0			0		0			0		0			0		0			0		0			0		0			0
0	60.3229	0	0		0	27.0838	0	0		0	122.177	0	0		0	52.0386	0	0		0	110.865	0	0		0	79.1891	0	0		0	115.378	0	0		0	67.9906	0	0		0	138.042	0	0		0	72.1112	0	0
0			0		0			0		0			0		0			0		0			0		0			0		0			0		0			0		0			0		0			0
0	60.4978	0	0		0	27.1623	0	0		0	122.532	0	0		0	52.1894	0	0		0	111.186	0	0		0	79.4187	0	0		0	115.712	0	0		0	68.1876	0	0		0	138.442	0	0		0	72.3202	0	0
0			0		0			0		0			0		0			0		0			0		0			0		0			0		0			0		0			0		0			0
0	60.6726	0	0		0	27.2408	0	0		0	122.886	0	0		0	52.3402	0	0		0	111.507	0	0		0	79.6482	0	0		4.83528	116.047	4.16667	40.0949		0	68.3847	0	0		0	138.842	0	0		0	72.5292	0	0
0			0		0			0		0			0		0			0		0			0		0			0		0			0		0			0		0			0		0			0
0	60.8475	0	0		1.51774	27.3193	5.55556	1.46491		0	123.24	0	0		0	52.4911	0	0		0	111.829	0	0		0	79.8777	0	0		0	116.381	0	0		0	68.5818	0	0		0	139.242	0	0		0	72.7383	0	0
0			0		0			0		0			0		0			0		0			0		0			0		0			0		0			0		0			0		0			0
0	61.0223	0	0		0	27.3978	0	0		0	123.594	0	0		0	52.6419	0	0		0	112.15	0	0		0	80.1073	0	0		0	116.716	0	0		0	68.7789	0	0		0	139.642	0	0		0	72.9473	0	0
0			0		0			0		0			0		0			0		0			0		0			0		0			0		0			0		0			0		0			0
0	61.1972	0	0		0	27.4763	0	0		2.95115	123.948	2.38095	20.4412		0	52.7927	0	0		0	112.472	0	0		7.17293	80.3368	8.92857	15.9189		0	117.05	0	0		0	68.9759	0	0		0	140.042	0	0		5.46297	73.1563	7.46753	8.90892
0			0		0			0		0			0		0			0		0			0		0			0		0			0		0			0		0			0		0			0
0	61.372	0	0		0	27.5548	0	0		0	124.302	0	0		0	52.9436	0	0		0	112.793	0	0		0	80.5663	0	0		0	117.385	0	0		0	69.173	0	0		4.01263	140.442	2.85714	17.0724		0	73.3653	0	0
0			0		0			0		0			0		0			0		0			0		0			0		0			0		0			0		0			0		0			0
0	61.5469	0	0		0	27.6333	0	0		0	124.656	0	0		0	53.0944	0	0		0	113.114	0	0		0	80.7959	0	0		0	117.719	0	0		0	69.3701	0	0		0	140.842	0	0		0	73.5743	0	0
0			0		0			0		0			0		0			0		0			0		0			0		0			0		0			0		0			0		0			0
0	61.7217	0	0		0	27.7118	0	0		0	125.011	0	0		0	53.2453	0	0		0	113.436	0	0		0	81.0254	0	0		0	118.053	0	0		0	69.5672	0	0		0	141.242	0	0		0	73.7833	0	0
0			0		0			0		0			0		0			0		0			0		0			0		0			0		0			0		0			0		0			0
0	61.8966	0	0		0	27.7903	0	0		0	125.365	0	0		0	53.3961	0	0		0	113.757	0	0		0	81.2549	0	0		0	118.388	0	0		0	69.7642	0	0		0	141.643	0	0		0	73.9924	0	0
0			0		0			0		0			0		0			0		0			0		0			0		0			0		0			0		0			0		0			0
2.95578	62.0714	4.7619	0.0168764		0	27.8688	0	0		0	125.719	0	0		2.45879	53.5469	4.59184	13.0167		6.07517	114.078	5.32544	14.9275		0	81.4845	0	0		0	118.722	0	0		0	69.9613	0	0		0	142.043	0	0		0	74.2014	0	0
0			0		0			0		0			0		0			0		0			0		0			0		0			0		0			0		0			0		0			0
0	62.2463	0	0		0	27.9473	0	0		0	126.073	0	0		0	53.6978	0	0		0	114.4	0	0		0	81.714	0	0		2.48035	119.057	2.08333	24.1264		2.40015	70.1584	3.42105	14.3201		0	142.443	0	0		0	74.4104	0	0
0			0		0			0		0			0		0			0		0			0		0			0		0			0		0			0		0			0		0			0
0	62.4211	0	0		0	28.0258	0	0		0	126.427	0	0		0	53.8486	0	0		0	114.721	0	0		0	81.9435	0	0		0	119.391	0	0		0	70.3555	0	0		0	142.843	0	0		0	74.6194	0	0
0			0		0			0		0			0		0			0		0			0		0			0		0			0		0			0		0			0		0			0
0	62.596	0	0		0	28.1043	0	0		0	126.781	0	0		0	53.9994	0	0		0	115.042	0	0		0	82.1731	0	0		0	119.725	0	0		0	70.5525	0	0		3.06949	143.243	2.14286	15.9066		0	74.8285	0	0
0			0		0			0		0			0		0			0		0			0		0			0		0			0		0			0		0			0		0			0
0	62.7708	0	0		0	28.1828	0	0		0	127.135	0	0		0	54.1503	0	0		0	115.364	0	0		0	82.4026	0	0		0	120.06	0	0		0	70.7496	0	0		0	143.643	0	0		0	75.0375	0	0
0			0		0			0		0			0		0			0		0			0		0			0		0			0		0			0		0			0		0			0
0	62.9457	0	0		0	28.2613	0	0		6.07093	127.49	4.7619	51.3621		0	54.3011	0	0		0	115.685	0	0		0	82.6321	0	0		0	120.394	0	0		0	70.9467	0	0		0	144.043	0	0		0	75.2465	0	0
0			0		0			0		0			0		0			0		0			0		0			0		0			0		0			0		0			0		0			0
0	63.1205	0	0		0	28.3398	0	0		0	127.844	0	0		0	54.452	0	0		0	116.006	0	0		0	82.8617	0	0		0	120.729	0	0		0	71.1437	0	0		0	144.443	0	0		0	75.4555	0	0
0			0		0			0		0			0		0			0		0			0		0			0		0			0		0			0		0			0		0			0
0	63.2953	0	0		0	28.4183	0	0		0	128.198	0	0		0	54.6028	0	0		0	116.328	0	0		0	83.0912	0	0		0	121.063	0	0		0	71.3408	0	0		0	144.844	0	0		0	75.6645	0	0
0			0		0			0		0			0		0			0		0			0		0			0		0			0		0			0		0			0		0			0
0	63.4702	0	0		0	28.4968	0	0		0	128.552	0	0		0	54.7536	0	0		0	116.649	0	0		0	83.3207	0	0		0	121.398	0	0		0	71.5379	0	0		0	145.244	0	0		0	75.8735	0	0
0			0		0			0		0			0		0			0		0			0		0			0		0			0		0			0		0			0		0			0
0	63.645	0	0		0	28.5753	0	0		0	128.906	0	0		0	54.9045	0	0		0	116.97	0	0		0	83.5503	0	0		0	121.732	0	0		0	71.735	0	0		0	145.644	0	0		0	76.0825	0	0
0			0		0			0		0			0		0			0		0			0		0			0		0			0		0			0		0			0		0			0
1.51952	63.8199	2.38095	0.130796		0	28.6538	0	0		0	129.26	0	0		0	55.0553	0	0		4.85824	117.292	4.14201	16.4949		4.98689	83.7798	5.95238	16.7911		0.847684	122.067	0.694445	9.52767		0	71.9321	0	0		0	146.044	0	0		5.6971	76.2916	7.46753	14.7575
0			0		0			0		0			0		0			0		0			0		0			0		0			0		0			0		0			0		0			0
0	63.9947	0	0		0	28.7323	0	0		0	129.614	0	0		0	55.2061	0	0		0	117.613	0	0		0	84.0093	0	0		0	122.401	0	0		0	72.1291	0	0		2.09206	146.444	1.42857	13.2425		0	76.5006	0	0
0			0		0			0		0			0		0			0		0			0		0			0		0			0		0			0		0			0		0			0
0	64.1696	0	0		0	28.8108	0	0		0	129.969	0	0		0	55.357	0	0		0	117.934	0	0		0	84.2389	0	0		0	122.735	0	0		0	72.3262	0	0		0	146.844	0	0		0	76.7096	0	0
0			0		0			0		0			0		0			0		0			0		0			0		0			0		0			0		0			0		0			0
0	64.3444	0	0		0	28.8893	0	0		0	130.323	0	0		0	55.5078	0	0		0	118.256	0	0		0	84.4684	0	0		0	123.07	0	0		0	72.5233	0	0		0	147.244	0	0		0	76.9186	0	0
0			0		0			0		0			0		0			0		0			0		0			0		0			0		0			0		0			0		0			0
0	64.5193	0	0		0	28.9678	0	0		6.22271	130.677	4.7619	61.8148		0	55.6586	0	0		0	118.577	0	0		0	84.6979	0	0		0	123.404	0	0		0	72.7203	0	0		0	147.644	0	0		0	77.1276	0	0
0			0		0			0		0			0		0			0		0			0		0			0		0			0		0			0		0			0		0			0
0	64.6941	0	0		0	29.0464	0	0		0	131.031	0	0		0	55.8095	0	0		0	118.898	0	0		0	84.9275	0	0		0	123.739	0	0		0	72.9174	0	0		0	148.044	0	0		0	77.3367	0	0
0			0		0			0		0			0		0			0		0			0		0			0		0			0		0			0		0			0		0			0
0	64.869	0	0		0	29.1248	0	0		0	131.385	0	0		0	55.9603	0	0		0	119.22	0	0		0	85.157	0	0		0	124.073	0	0		0	73.1145	0	0		0	148.445	0	0		0	77.5457	0	0
0			0		0			0		0			0		0			0		0			0		0			0		0			0		0			0		0			0		0			0
0	65.0438	0	0		0.648963	29.2034	2.22222	1.09484		0	131.739	0	0		0	56.1112	0	0		0	119.541	0	0		0	85.3865	0	0		0	124.407	0	0		2.50803	73.3116	3.42105	19.0742		0	148.845	0	0		0	77.7547	0	0
0			0		0			0		0			0		0			0		0			0		0			0		0			0		0			0		0			0		0			0
0	65.2187	0	0		0	29.2819	0	0		0	132.093	0	0		0	56.262	0	0		0	119.862	0	0		0	85.6161	0	0		0	124.742	0	0		0	73.5086	0	0		0	149.245	0	0		0	77.9637	0	0
0			0		0			0		0			0		0			0		0			0		0			0		0			0		0			0		0			0		0			0
0	65.3935	0	0		0	29.3604	0	0		0	132.447	0	0		0	56.4128	0	0		0	120.184	0	0		0	85.8456	0	0		0.868586	125.076	0.694445	11.139		0	73.7057	0	0		1.06889	149.645	0.714286	8.08668		0	78.1727	0	0
0			0		0			0		0			0		0			0		0			0		0			0		0			0		0			0		0			0		0			0
7.80576	65.5684	11.9048	1.99368		0	29.4389	0	0		0	132.802	0	0		0	56.5637	0	0		4.99134	120.505	4.14201	22.2351		0	86.0751	0	0		0	125.411	0	0		0	73.9028	0	0		0	150.045	0	0		0	78.3817	0	0
0			0		0			0		0			0		0			0		0			0		0			0		0			0		0			0		0			0		0			0
0	65.7432	0	0		0	29.5174	0	0		0	133.156	0	0		0	56.7145	0	0		0	120.826	0	0		0	86.3047	0	0		0	125.745	0	0		0	74.0999	0	0		0	150.445	0	0		0	78.5908	0	0
0			0		0			0		0			0		0			0		0			0		0			0		0			0		0			0		0			0		0			0
0	65.9181	0	0		0	29.5959	0	0		0	133.51	0	0		0	56.8653	0	0		0	121.148	0	0		0	86.5342	0	0		0	126.08	0	0		0	74.2969	0	0		0	150.845	0	0		0	78.7998	0	0
0			0		0			0		0			0		0			0		0			0		0			0		0			0		0			0		0			0		0			0
0	66.0929	0	0		0	29.6744	0	0		0	133.864	0	0		1.74539	57.0162	3.06122	12.6224		0	121.469	0	0		0	86.7637	0	0		0	126.414	0	0		0	74.494	0	0		0	151.245	0	0		0	79.0088	0	0
0			0		0			0		0			0		0			0		0			0		0			0		0			0		0			0		0			0		0			0
0	66.2678	0	0		0	29.7529	0	0		3.19567	134.218	2.38095	37.2819		0	57.167	0	0		0	121.791	0	0		0	86.9933	0	0		0	126.749	0	0		0	74.6911	0	0		0	151.645	0	0		0	79.2178	0	0
0			0		0			0		0			0		0			0		0			0		0			0		0			0		0			0		0			0		0			0
0	66.4426	0	0		0	29.8314	0	0		0	134.572	0	0		0	57.3178	0	0		0	122.112	0	0		2.59592	87.2228	2.97619	12.1905		0	127.083	0	0		0	74.8882	0	0		0	152.046	0	0		4.64183	79.4268	5.84416	17.2755
0			0		0			0		0			0		0			0		0			0		0			0		0			0		0			0		0			0		0			0
0	66.6175	0	0		0	29.9099	0	0		0	134.927	0	0		0	57.4687	0	0		0	122.433	0	0		0	87.4523	0	0		0	127.417	0	0		0	75.0852	0	0		4.35559	152.446	2.85714	37.9561		0	79.6359	0	0
0			0		0			0		0			0		0			0		0			0		0			0		0			0		0			0		0			0		0			0
0	66.7923	0	0		0	29.9884	0	0		0	135.281	0	0		0	57.6195	0	0		0	122.755	0	0		0	87.6819	0	0		0	127.752	0	0		0	75.2823	0	0		0	152.846	0	0		0	79.8449	0	0
0			0		0			0		0			0		0			0		0			0		0			0		0			0		0			0		0			0		0			0
0	66.9672	0	0		0	30.0669	0	0		0	135.635	0	0		0	57.7704	0	0		0	123.076	0	0		0	87.9114	0	0		1.77898	128.086	1.38889	25.7523		0	75.4794	0	0		0	153.246	0	0		0	80.0539	0	0
0			0		0			0		0			0		0			0		0			0		0			0		0			0		0			0		0			0		0			0
0	67.142	0	0		0	30.1454	0	0		0	135.989	0	0		0	57.9212	0	0		0	123.397	0	0		0	88.141	0	0		0	128.421	0	0		0	75.6765	0	0		0	153.646	0	0		0	80.2629	0	0
0			0		0			0		0			0		0			0		0			0		0			0		0			0		0			0		0			0		0			0
0	67.3169	0	0		0	30.2239	0	0		0	136.343	0	0		0	58.072	0	0		0	123.719	0	0		0	88.3705	0	0		0	128.755	0	0		0	75.8735	0	0		0	154.046	0	0		0	80.4719	0	0
0			0		0			0		0			0		0			0		0			0		0			0		0			0		0			0		0			0		0			0
6.42778	67.4917	9.52381	3.44647		0	30.3024	0	0		0	136.697	0	0		0	58.2229	0	0		6.60568	124.04	5.32544	37.9763		0	88.6	0	0		0	129.089	0	0		0	76.0706	0	0		0	154.446	0	0		0	80.6809	0	0
0			0		0			0		0			0		0			0		0			0		0			0		0			0		0			0		0			0		0			0
0	67.6666	0	0		0	30.3809	0	0		0	137.051	0	0		0	58.3737	0	0		0	124.361	0	0		0	88.8295	0	0		0	129.424	0	0		1.00352	76.2677	1.31579	9.2881		0	154.846	0	0		0	80.89	0	0
0			0		0			0		0			0		0			0		0			0		0			0		0			0		0			0		0			0		0			0
0	67.8414	0	0		0	30.4594	0	0		3.27156	137.405	2.38095	43.5295		0	58.5245	0	0		0	124.683	0	0		0	89.0591	0	0		0	129.758	0	0		0	76.4648	0	0		0	155.247	0	0		0	81.099	0	0
0			0		0			0		0			0		0			0		0			0		0			0		0			0		0			0		0			0		0			0
0	68.0163	0	0		0	30.5379	0	0		0	137.76	0	0		0	58.6754	0	0		0	125.004	0	0		0	89.2886	0	0		0	130.093	0	0		0	76.6618	0	0		2.22352	155.647	1.42857	22.4578		0	81.308	0	0
0			0		0			0		0			0		0			0		0			0		0			0		0			0		0			0		0			0		0			0
0	68.1911	0	0		0	30.6164	0	0		0	138.114	0	0		0	58.8262	0	0		0	125.325	0	0		0	89.5182	0	0		0	130.427	0	0		0	76.8589	0	0		0	156.047	0	0		0	81.517	0	0
0			0		0			0		0			0		0			0		0			0		0			0		0			0		0			0		0			0		0			0
0	68.366	0	0		0	30.6949	0	0		0	138.468	0	0		0	58.977	0	0		0	125.647	0	0		0	89.7477	0	0		0	130.762	0	0		0	77.056	0	0		0	156.447	0	0		0	81.726	0	0
0			0		0			0		0			0		0			0		0			0		0			0		0			0		0			0		0			0		0			0
0	68.5408	0	0		0	30.7734	0	0		0	138.822	0	0		0	59.1279	0	0		0	125.968	0	0		0	89.9772	0	0		0	131.096	0	0		0	77.2531	0	0		0	156.847	0	0		0	81.9351	0	0
0			0		0			0		0			0		0			0		0			0		0			0		0			0		0			0		0			0		0			0
0	68.7157	0	0		0	30.8519	0	0		0	139.176	0	0		0	59.2787	0	0		0	126.289	0	0		0	90.2067	0	0		0	131.43	0	0		0	77.4501	0	0		0	157.247	0	0		0	82.1441	0	0
0			0		0			0		0			0		0			0		0			0		0			0		0			0		0			0		0			0		0			0
0	68.8905	0	0		0	30.9304	0	0		0	139.53	0	0		0	59.4295	0	0		0	126.611	0	0		2.69156	90.4363	2.97619	16.369		0	131.765	0	0		0	77.6472	0	0		0	157.647	0	0		2.13904	82.3531	2.5974	10.514
0			0		0			0		0			0		0			0		0			0		0			0		0			0		0			0		0			0		0			0
0	69.0654	0	0		1.03363	31.0089	3.33333	2.59583		0	139.884	0	0		0	59.5804	0	0		0	126.932	0	0		0	90.6658	0	0		0	132.099	0	0		0	77.8443	0	0		0	158.048	0	0		0	82.5621	0	0
0			0		0			0		0			0		0			0		0			0		0			0		0			0		0			0		0			0		0			0
1.64858	69.2402	2.38095	1.43528		0	31.0874	0	0		0	140.238	0	0		0	59.7312	0	0		1.50596	127.254	1.18343	10.5925		0	90.8953	0	0		0	132.434	0	0		0	78.0413	0	0		0	158.448	0	0		0	82.7711	0	0
0			0		0			0		0			0		0			0		0			0		0			0		0			0		0			0		0			0		0			0
0	69.4151	0	0		0	31.1659	0	0		0	140.593	0	0		0	59.8821	0	0		0	127.575	0	0		0	91.1249	0	0		0	132.768	0	0		0	78.2384	0	0		3.40388	158.848	2.14286	39.3455		0	82.9801	0	0
0			0		0			0		0			0		0			0		0			0		0			0		0			0		0			0		0			0		0			0
0	69.5899	0	0		0	31.2445	0	0		0	140.947	0	0		0	60.0329	0	0		0	127.896	0	0		0	91.3544	0	0		0	133.103	0	0		0	78.4355	0	0		0	159.248	0	0		0	83.1892	0	0
0			0		0			0		0			0		0			0		0			0		0			0		0			0		0			0		0			0		0			0
0	69.7648	0	0		0	31.3229	0	0		0	141.301	0	0		0	60.1837	0	0		0	128.218	0	0		0	91.584	0	0		0	133.437	0	0		0	78.6326	0	0		0	159.648	0	0		0	83.3982	0	0
0			0		0			0		0			0		0			0		0			0		0			0		0			0		0			0		0			0		0			0
0	69.9396	0	0		0	31.4015	0	0		0	141.655	0	0		0.615659	60.3346	1.02041	5.69501		0	128.539	0	0		0	91.8135	0	0		0	133.772	0	0		0	78.8297	0	0		0	160.048	0	0		0	83.6072	0	0
0			0		0			0		0			0		0			0		0			0		0			0		0			0		0			0		0			0		0			0
0	70.1145	0	0		0	31.48	0	0		0	142.009	0	0		0	60.4854	0	0		0	128.86	0	0		0	92.043	0	0		0	134.106	0	0		0	79.0267	0	0		0	160.448	0	0		0	83.8162	0	0
0			0		0			0		0			0		0			0		0			0		0			0		0			0		0			0		0			0		0			0
0	70.2893	0	0		0	31.5585	0	0		0	142.363	0	0		0	60.6362	0	0		0	129.182	0	0		0	92.2725	0	0		0.933614	134.44	0.694445	16.9567		0	79.2238	0	0		0	160.848	0	0		0	84.0252	0	0
0			0		0			0		0			0		0			0		0			0		0			0		0			0		0			0		0			0		0			0
0	70.4642	0	0		0	31.637	0	0		0	142.718	0	0		0	60.7871	0	0		0	129.503	0	0		0	92.5021	0	0		0	134.775	0	0		1.67202	79.4209	2.10526	18.5977		0	161.248	0	0		0	84.2343	0	0
0			0		0			0		0			0		0			0		0			0		0			0		0			0		0			0		0			0		0			0
0	70.639	0	0		0	31.7155	0	0		0	143.072	0	0		0	60.9379	0	0		0	129.824	0	0		0	92.7316	0	0		0	135.109	0	0		0	79.6179	0	0		4.61853	161.649	2.85714	59.5428		0	84.4433	0	0
0			0		0			0		0			0		0			0		0			0		0			0		0			0		0			0		0			0		0			0
0	70.8139	0	0		0	31.794	0	0		0	143.426	0	0		0	61.0887	0	0		0	130.146	0	0		0	92.9612	0	0		0	135.444	0	0		0	79.815	0	0		0	162.049	0	0		0	84.6523	0	0
0			0		0			0		0			0		0			0		0			0		0			0		0			0		0			0		0			0		0			0
0	70.9887	0	0		0	31.8725	0	0		0	143.78	0	0		0	61.2396	0	0		0	130.467	0	0		0	93.1907	0	0		0	135.778	0	0		0	80.0121	0	0		0	162.449	0	0		0	84.8613	0	0
0			0		0			0		0			0		0			0		0			0		0			0		0			0		0			0		0			0		0			0
3.38874	71.1636	4.7619	4.46891		0	31.951	0	0		0	144.134	0	0		0	61.3904	0	0		6.96506	130.788	5.32544	59.5952		0	93.4202	0	0		0	136.113	0	0		0	80.2092	0	0		0	162.849	0	0		0	85.0703	0	0
0			0		0			0		0			0		0			0		0			0		0			0		0			0		0			0		0			0		0			0
0	71.3384	0	0		0	32.0295	0	0		0	144.488	0	0		0	61.5413	0	0		0	131.11	0	0		0	93.6498	0	0		0	136.447	0	0		0	80.4062	0	0		0	163.249	0	0		0	85.2793	0	0
0			0		0			0		0			0		0			0		0			0		0			0		0			0		0			0		0			0		0			0
0	71.5132	0	0		0	32.108	0	0		0	144.842	0	0		0	61.6921	0	0		0	131.431	0	0		5.02925	93.8793	5.35714	38.7506		0	136.781	0	0		0	80.6033	0	0		0	163.649	0	0		1.11024	85.4884	1.2987	7.02308
0			0		0			0		0			0		0			0		0			0		0			0		0			0		0			0		0			0		0			0
0	71.6881	0	0		0	32.1865	0	0		0	145.196	0	0		0	61.8429	0	0		0	131.752	0	0		0	94.1088	0	0		0	137.116	0	0		0	80.8004	0	0		0	164.049	0	0		0	85.6974	0	0
0			0		0			0		0			0		0			0		0			0		0			0		0			0		0			0		0			0		0			0
0	71.8629	0	0		0	32.265	0	0		0	145.551	0	0		0	61.9938	0	0		0	132.074	0	0		0	94.3384	0	0		0	137.45	0	0		0	80.9975	0	0		0	164.449	0	0		0	85.9064	0	0
0			0		0			0		0			0		0			0		0			0		0			0		0			0		0			0		0			0		0			0
0	72.0378	0	0		0	32.3435	0	0		0	145.905	0	0		0	62.1446	0	0		0	132.395	0	0		0	94.5679	0	0		0	137.785	0	0		0	81.1945	0	0		2.35499	164.85	1.42857	34.0928		0	86.1154	0	0
0			0		0			0		0			0		0			0		0			0		0			0		0			0		0			0		0			0		0			0
0	72.2126	0	0		0	32.422	0	0		0	146.259	0	0		0	62.2955	0	0		0	132.716	0	0		0	94.7974	0	0		0	138.119	0	0		0	81.3916	0	0		0	165.25	0	0		0	86.3244	0	0
0			0		0			0		0			0		0			0		0			0		0			0		0			0		0			0		0			0		0			0
0	72.3875	0	0		0	32.5005	0	0		0	146.613	0	0		0	62.4463	0	0		0	133.038	0	0		0	95.0269	0	0		0	138.453	0	0		0	81.5887	0	0		0	165.65	0	0		0	86.5335	0	0
0			0		0			0		0			0		0			0		0			0		0			0		0			0		0			0		0			0		0			0
0	72.5623	0	0		0	32.579	0	0		0	146.967	0	0		0	62.5971	0	0		0	133.359	0	0		0	95.2565	0	0		0	138.788	0	0		0	81.7858	0	0		0	166.05	0	0		0	86.7425	0	0
0			0		0			0		0			0		0			0		0			0		0			0		0			0		0			0		0			0		0			0
0	72.7372	0	0		0	32.6575	0	0		0	147.321	0	0		0	62.748	0	0		0	133.68	0	0		0	95.486	0	0		0	139.122	0	0		0	81.9828	0	0		0	166.45	0	0		0	86.9515	0	0
0			0		0			0		0			0		0			0		0			0		0			0		0			0		0			0		0			0		0			0
1.736	72.912	2.38095	3.11384		0	32.736	0	0		0	147.675	0	0		0	62.8988	0	0		1.58582	134.002	1.18343	15.9099		0	95.7156	0	0		0	139.457	0	0		0	82.1799	0	0		0	166.85	0	0		0	87.1605	0	0
0			0		0			0		0			0		0			0		0			0		0			0		0			0		0			0		0			0		0			0
0	73.0869	0	0		1.45842	32.8145	4.44444	5.02233		0	148.03	0	0		0	63.0496	0	0		0	134.323	0	0		0	95.9451	0	0		0	139.791	0	0		0.650345	82.377	0.789474	8.43041		0	167.25	0	0		0	87.3695	0	0
0			0		0			0		0			0		0			0		0			0		0			0		0			0		0			0		0			0		0			0
0	73.2617	0	0		0	32.893	0	0		0	148.384	0	0		0	63.2005	0	0		0	134.644	0	0		0	96.1746	0	0		0	140.126	0	0		0	82.574	0	0		3.59251	167.65	2.14286	57.1713		0	87.5785	0	0
0			0		0			0		0			0		0			0		0			0		0			0		0			0		0			0		0			0		0			0
0	73.4366	0	0		0	32.9715	0	0		0	148.738	0	0		0	63.3513	0	0		0	134.966	0	0		0	96.4042	0	0		0	140.46	0	0		0	82.7711	0	0		0	168.05	0	0		0	87.7875	0	0
0			0		0			0		0			0		0			0		0			0		0			0		0			0		0			0		0			0		0			0
0	73.6114	0	0		0	33.05	0	0		0	149.092	0	0		0	63.5021	0	0		0	135.287	0	0		0	96.6337	0	0		0	140.794	0	0		0	82.9682	0	0		0	168.451	0	0		0	87.9966	0	0
0			0		0			0		0			0		0			0		0			0		0			0		0			0		0			0		0			0		0			0
0	73.7863	0	0		0	33.1285	0	0		0	149.446	0	0		0.97428	63.653	1.53061	11.1109		0	135.608	0	0		0	96.8632	0	0		0	141.129	0	0		0	83.1653	0	0		0	168.851	0	0		0	88.2056	0	0
0			0		0			0		0			0		0			0		0			0		0			0		0			0		0			0		0			0		0			0
0	73.9611	0	0		0	33.207	0	0		0	149.8	0	0		0	63.8038	0	0		0	135.93	0	0		2.31173	97.0928	2.38095	21.5839		0	141.463	0	0		0	83.3623	0	0		0	169.251	0	0		2.8706	88.4146	3.24675	22.2545
0			0		0			0		0			0		0			0		0			0		0			0		0			0		0			0		0			0		0			0
0	74.136	0	0		0	33.2856	0	0		0	150.154	0	0		0	63.9547	0	0		0	136.251	0	0		0	97.3223	0	0		0	141.798	0	0		0	83.5594	0	0		0	169.651	0	0		0	88.6236	0	0
0			0		0			0		0			0		0			0		0			0		0			0		0			0		0			0		0			0		0			0
0	74.3108	0	0		0	33.364	0	0		0	150.508	0	0		0	64.1055	0	0		0	136.573	0	0		0	97.5518	0	0		0	142.132	0	0		0	83.7565	0	0		0	170.051	0	0		0	88.8327	0	0
0			0		0			0		0			0		0			0		0			0		0			0		0			0		0			0		0			0		0			0
0	74.4857	0	0		0	33.4425	0	0		0	150.863	0	0		0	64.2563	0	0		0	136.894	0	0		0	97.7814	0	0		0	142.467	0	0		0	83.9536	0	0		0	170.451	0	0		0	89.0417	0	0
0			0		0			0		0			0		0			0		0			0		0			0		0			0		0			0		0			0		0			0
0	74.6605	0	0		0	33.5211	0	0		0	151.217	0	0		0	64.4072	0	0		0	137.215	0	0		0	98.0109	0	0		0	142.801	0	0		0	84.1506	0	0		3.6611	170.851	2.14286	64.4768		0	89.2507	0	0
0			0		0			0		0			0		0			0		0			0		0			0		0			0		0			0		0			0		0			0
3.56359	74.8354	4.7619	8.49861		0	33.5996	0	0		0	151.571	0	0		0	64.558	0	0		4.06913	137.537	2.95858	47.8136		0	98.2404	0	0		0	143.136	0	0		0	84.3477	0	0		0	171.251	0	0		0	89.4597	0	0
0			0		0			0		0			0		0			0		0			0		0			0		0			0		0			0		0			0		0			0
0	75.0102	0	0		0	33.6781	0	0		0	151.925	0	0		0	64.7088	0	0		0	137.858	0	0		0	98.47	0	0		0.996319	143.47	0.694445	23.7199		0	84.5448	0	0		0	171.651	0	0		0	89.6687	0	0
0			0		0			0		0			0		0			0		0			0		0			0		0			0		0			0		0			0		0			0
0	75.1851	0	0		0	33.7566	0	0		0	152.279	0	0		0	64.8597	0	0		0	138.179	0	0		0	98.6995	0	0		0	143.804	0	0		0	84.7419	0	0		0	172.052	0	0		0	89.8777	0	0
0			0		0			0		0			0		0			0		0			0		0			0		0			0		0			0		0			0		0			0
0	75.3599	0	0		0	33.8351	0	0		0	152.633	0	0		0	65.0105	0	0		0	138.501	0	0		0	98.929	0	0		0	144.139	0	0		0	84.939	0	0		0	172.452	0	0		0	90.0868	0	0
0			0		0			0		0			0		0			0		0			0		0			0		0			0		0			0		0			0		0			0
0	75.5348	0	0		0	33.9136	0	0		0	152.988	0	0		0	65.1613	0	0		0	138.822	0	0		0	99.1586	0	0		0	144.473	0	0		0	85.136	0	0		0	172.852	0	0		0	90.2958	0	0
0			0		0			0		0			0		0			0		0			0		0			0		0			0		0			0		0			0		0			0
0	75.7096	0	0		0	33.9921	0	0		0	153.342	0	0		0	65.3122	0	0		0	139.143	0	0		0	99.3881	0	0		0	144.808	0	0		0	85.3331	0	0		0	173.252	0	0		0	90.5048	0	0
0			0		0			0		0			0		0			0		0			0		0			0		0			0		0			0		0			0		0			0
0	75.8845	0	0		0	34.0706	0	0		0	153.696	0	0		0	65.463	0	0		0	139.465	0	0		0	99.6176	0	0		0	145.142	0	0		0.900318	85.5302	1.05263	13.5145		0	173.652	0	0		0	90.7138	0	0
0			0		0			0		0			0		0			0		0			0		0			0		0			0		0			0		0			0		0			0
0	76.0593	0	0		0	34.1491	0	0		0	154.05	0	0		0	65.6138	0	0		0	139.786	0	0		0	99.8472	0	0		0	145.476	0	0		0	85.7272	0	0		2.48646	174.052	1.42857	48.1477		0	90.9228	0	0
0			0		0			0		0			0		0			0		0			0		0			0		0			0		0			0		0			0		0			0
0	76.2342	0	0		0	34.2276	0	0		0	154.404	0	0		0	65.7647	0	0		0	140.107	0	0		0	100.077	0	0		0	145.811	0	0		0	85.9243	0	0		0	174.452	0	0		0	91.1318	0	0
0			0		0			0		0			0		0			0		0			0		0			0		0			0		0			0		0			0		0			0
0	76.409	0	0		0	34.3061	0	0		0	154.758	0	0		0	65.9155	0	0		0	140.429	0	0		0	100.306	0	0		0	146.145	0	0		0	86.1214	0	0		0	174.852	0	0		0	91.3409	0	0
0			0		0			0		0			0		0			0		0			0		0			0		0			0		0			0		0			0		0			0
3.64685	76.5839	4.7619	10.8688		0	34.3846	0	0		0	155.112	0	0		0	66.0664	0	0		0	140.75	0	0		3.59056	100.536	3.57143	40.2039		0	146.48	0	0		0	86.3185	0	0		0	175.253	0	0		0.29724	91.5499	0.324675	2.79037
0			0		0			0		0			0		0			0		0			0		0			0		0			0		0			0		0			0		0			0
0	76.7587	0	0		0	34.4631	0	0		0	155.466	0	0		0	66.2172	0	0		0	141.071	0	0		0	100.765	0	0		0	146.814	0	0		0	86.5155	0	0		0	175.653	0	0		0	91.7589	0	0
0			0		0			0		0			0		0			0		0			0		0			0		0			0		0			0		0			0		0			0
0	76.9336	0	0		0	34.5416	0	0		0	155.821	0	0		0	66.368	0	0		0	141.393	0	0		0	100.995	0	0		0	147.149	0	0		0	86.7126	0	0		0	176.053	0	0		0	91.9679	0	0
0			0		0			0		0			0		0			0		0			0		0			0		0			0		0			0		0			0		0			0
0	77.1084	0	0		1.154	34.6201	3.33333	5.15501		0	156.175	0	0		0	66.5189	0	0		0	141.714	0	0		0	101.224	0	0		0	147.483	0	0		0	86.9097	0	0		0	176.453	0	0		0	92.1769	0	0
0			0		0			0		0			0		0			0		0			0		0			0		0			0		0			0		0			0		0			0
0	77.2833	0	0		0	34.6986	0	0		0	156.529	0	0		0	66.6697	0	0		0	142.036	0	0		0	101.454	0	0		0	147.817	0	0		0	87.1068	0	0		0	176.853	0	0		0	92.3859	0	0
0			0		0			0		0			0		0			0		0			0		0			0		0			0		0			0		0			0		0			0
0	77.4581	0	0		0	34.7771	0	0		0	156.883	0	0		0	66.8205	0	0		0	142.357	0	0		0	101.683	0	0		0	148.152	0	0		0	87.3038	0	0		0	177.253	0	0		0	92.595	0	0
0			0		0			0		0			0		0			0		0			0		0			0		0			0		0			0		0			0		0			0
0	77.633	0	0		0	34.8556	0	0		0	157.237	0	0		0.683381	66.9714	1.02041	9.34427		0	142.678	0	0		0	101.913	0	0		0	148.486	0	0		0	87.5009	0	0		0	177.653	0	0		0	92.804	0	0
0			0		0			0		0			0		0			0		0			0		0			0		0			0		0			0		0			0		0			0
0	77.8078	0	0		0	34.9341	0	0		3.75217	157.591	2.38095	94.3314		0	67.1222	0	0		0	143	0	0		0	102.142	0	0		0	148.821	0	0		0	87.698	0	0		0	178.054	0	0		0	93.013	0	0
0			0		0			0		0			0		0			0		0			0		0			0		0			0		0			0		0			0		0			0
0	77.9827	0	0		0	35.0126	0	0		0	157.945	0	0		0	67.273	0	0		0	143.321	0	0		0	102.372	0	0		0	149.155	0	0		0	87.895	0	0		0	178.454	0	0		0	93.222	0	0
0			0		0			0		0			0		0			0		0			0		0			0		0			0		0			0		0			0		0			0
0	78.1575	0	0		0	35.0911	0	0		0	158.3	0	0		0	67.4239	0	0		0	143.642	0	0		0	102.602	0	0		0	149.49	0	0		0	88.0921	0	0		0	178.854	0	0		0	93.431	0	0
0			0		0			0		0			0		0			0		0			0		0			0		0			0		0			0		0			0		0			0
5.59517	78.3324	7.14286	20.2953		0	35.1696	0	0		0	158.654	0	0		0	67.5747	0	0		4.25928	143.964	2.95858	64.3235		0	102.831	0	0		0	149.824	0	0		0	88.2892	0	0		0	179.254	0	0		0	93.6401	0	0
0			0		0			0		0			0		0			0		0			0		0			0		0			0		0			0		0			0		0			0
0	78.5072	0	0		0	35.2481	0	0		0	159.008	0	0		0	67.7256	0	0		0	144.285	0	0		0	103.061	0	0		0	150.159	0	0		0.465717	88.4863	0.526316	7.91818		0	179.654	0	0		0	93.8491	0	0
0			0		0			0		0			0		0			0		0			0		0			0		0			0		0			0		0			0		0			0
0	78.6821	0	0		0	35.3266	0	0		0	159.362	0	0		0	67.8764	0	0		0	144.606	0	0		0	103.29	0	0		0	150.493	0	0		0	88.6834	0	0		0	180.054	0	0		0	94.0581	0	0
0			0		0			0		0			0		0			0		0			0		0			0		0			0		0			0		0			0		0			0
0	78.8569	0	0		0	35.4051	0	0		0	159.716	0	0		0	68.0272	0	0		0	144.928	0	0		0	103.52	0	0		0	150.827	0	0		0	88.8804	0	0		0	180.454	0	0		0	94.2671	0	0
0			0		0			0		0			0		0			0		0			0		0			0		0			0		0			0		0			0		0			0
0	79.0318	0	0		0	35.4836	0	0		0	160.07	0	0		0	68.1781	0	0		0	145.249	0	0		0	103.749	0	0		0	151.162	0	0		0	89.0775	0	0		0	180.854	0	0		0	94.4761	0	0
0			0		0			0		0			0		0			0		0			0		0			0		0			0		0			0		0			0		0			0
0	79.2066	0	0		0	35.5622	0	0		0	160.424	0	0		0	68.3289	0	0		0	145.57	0	0		0.618921	103.979	0.595238	8.14642		0	151.496	0	0		0	89.2746	0	0		0	181.254	0	0		1.84452	94.6851	1.94805	20.5148
0			0		0			0		0			0		0			0		0			0		0			0		0			0		0			0		0			0		0			0
0	79.3815	0	0		0	35.6407	0	0		0	160.779	0	0		0	68.4797	0	0		0	145.892	0	0		0	104.208	0	0		0	151.831	0	0		0	89.4716	0	0		0	181.655	0	0		0	94.8942	0	0
0			0		0			0		0			0		0			0		0			0		0			0		0			0		0			0		0			0		0			0
0	79.5563	0	0		0	35.7192	0	0		0	161.133	0	0		0	68.6306	0	0		0	146.213	0	0		0	104.438	0	0		0	152.165	0	0		0	89.6687	0	0		0	182.055	0	0		0	95.1032	0	0
0			0		0			0		0			0		0			0		0			0		0			0		0			0		0			0		0			0		0			0
0	79.7312	0	0		0	35.7977	0	0		0	161.487	0	0		0	68.7814	0	0		0	146.534	0	0		0	104.667	0	0		0	152.5	0	0		0	89.8658	0	0		0	182.455	0	0		0	95.3122	0	0
0			0		0			0		0			0		0			0		0			0		0			0		0			0		0			0		0			0		0			0
0	79.906	0	0		0	35.8762	0	0		0	161.841	0	0		0	68.9322	0	0		0	146.856	0	0		0	104.897	0	0		0	152.834	0	0		0	90.0629	0	0		0	182.855	0	0		0	95.5212	0	0
0			0		0			0		0			0		0			0		0			0		0			0		0			0		0			0		0			0		0			0
0	80.0808	0	0		0	35.9547	0	0		0	162.195	0	0		0	69.0831	0	0		0	147.177	0	0		0	105.126	0	0		0	153.168	0	0		0	90.2599	0	0		1.30896	183.255	0.714286	32.311		0	95.7302	0	0
0			0		0			0		0			0		0			0		0			0		0			0		0			0		0			0		0			0		0			0
1.91085	80.2557	2.38095	8.397		0	36.0332	0	0		0	162.549	0	0		0	69.2339	0	0		2.61831	147.498	1.77515	44.6677		0	105.356	0	0		0	153.503	0	0		0	90.457	0	0		0	183.655	0	0		0	95.9393	0	0
0			0		0			0		0			0		0			0		0			0		0			0		0			0		0			0		0			0		0			0
0	80.4305	0	0		0	36.1117	0	0		0	162.903	0	0		0	69.3848	0	0		0	147.82	0	0		0	105.585	0	0		0	153.837	0	0		0	90.6541	0	0		0	184.055	0	0		0	96.1483	0	0
0			0		0			0		0			0		0			0		0			0		0			0		0			0		0			0		0			0		0			0
0	80.6054	0	0		0	36.1902	0	0		0	163.257	0	0		0	69.5356	0	0		0	148.141	0	0		0	105.815	0	0		0	154.172	0	0		0	90.8512	0	0		0	184.455	0	0		0	96.3573	0	0
0			0		0			0		0			0		0			0		0			0		0			0		0			0		0			0		0			0		0			0
0	80.7802	0	0		0	36.2687	0	0		0	163.612	0	0		0	69.6864	0	0		0	148.462	0	0		0	106.045	0	0		0	154.506	0	0		0	91.0482	0	0		0	184.856	0	0		0	96.5663	0	0
0			0		0			0		0			0		0			0		0			0		0			0		0			0		0			0		0			0		0			0
0	80.9551	0	0		0	36.3472	0	0		0	163.966	0	0		0	69.8373	0	0		0	148.784	0	0		0	106.274	0	0		0	154.84	0	0		0	91.2453	0	0		0	185.256	0	0		0	96.7753	0	0
0			0		0			0		0			0		0			0		0			0		0			0		0			0		0			0		0			0		0			0
0	81.1299	0	0		0	36.4257	0	0		7.82476	164.32	4.7619	231.154		0	69.9881	0	0		0	149.105	0	0		0	106.504	0	0		0	155.175	0	0		0	91.4424	0	0		0	185.656	0	0		0	96.9844	0	0
0			0		0			0		0			0		0			0		0			0		0			0		0			0		0			0		0			0		0			0
0	81.3048	0	0		2.02801	36.5042	5.55556	11.3923		0	164.674	0	0		0	70.1389	0	0		0	149.426	0	0		0	106.733	0	0		0	155.509	0	0		0.482313	91.6395	0.526316	9.25792		2.65794	186.056	1.42857	70.1165		0	97.1934	0	0
0			0		0			0		0			0		0			0		0			0		0			0		0			0		0			0		0			0		0			0
0	81.4796	0	0		0	36.5827	0	0		0	165.028	0	0		0	70.2898	0	0		0	149.748	0	0		0	106.963	0	0		0	155.844	0	0		0	91.8365	0	0		0	186.456	0	0		0	97.4024	0	0
0			0		0			0		0			0		0			0		0			0		0			0		0			0		0			0		0			0		0			0
0	81.6545	0	0		0	36.6612	0	0		0	165.382	0	0		0.718782	70.4406	1.02041	11.6096		0	150.069	0	0		0.638049	107.192	0.595238	9.6231		0	156.178	0	0		0	92.0336	0	0		0	186.856	0	0		0.95076	97.6114	0.974026	12.1907
0			0		0			0		0			0		0			0		0			0		0			0		0			0		0			0		0			0		0			0
0	81.8293	0	0		0	36.7397	0	0		0	165.737	0	0		0	70.5914	0	0		0	150.391	0	0		0	107.422	0	0		0	156.513	0	0		0	92.2307	0	0		0	187.256	0	0		0	97.8204	0	0
0			0		0			0		0			0		0			0		0			0		0			0		0			0		0			0		0			0		0			0
0	82.0042	0	0		0	36.8182	0	0		0	166.091	0	0		0	70.7423	0	0		0	150.712	0	0		0	107.651	0	0		0	156.847	0	0		0	92.4278	0	0		0	187.656	0	0		0	98.0294	0	0
0			0		0			0		0			0		0			0		0			0		0			0		0			0		0			0		0			0		0			0
0	82.1791	0	0		0	36.8967	0	0		0	166.445	0	0		0	70.8931	0	0		0	151.033	0	0		0	107.881	0	0		0	157.181	0	0		0	92.6248	0	0		0	188.056	0	0		0	98.2385	0	0
0			0		0			0		0			0		0			0		0			0		0			0		0			0		0			0		0			0		0			0
0	82.3539	0	0		0	36.9752	0	0		0	166.799	0	0		0	71.044	0	0		0	151.355	0	0		0	108.11	0	0		0	157.516	0	0		0	92.8219	0	0		0	188.457	0	0		0	98.4475	0	0
0			0		0			0		0			0		0			0		0			0		0			0		0			0		0			0		0			0		0			0
0	82.5287	0	0		0	37.0537	0	0		0	167.153	0	0		0	71.1948	0	0		0	151.676	0	0		0	108.34	0	0		0	157.85	0	0		0	93.019	0	0		0	188.857	0	0		0	98.6565	0	0
0			0		0			0		0			0		0			0		0			0		0			0		0			0		0			0		0			0		0			0
0	82.7036	0	0		0	37.1322	0	0		0	167.507	0	0		0	71.3456	0	0		0	151.997	0	0		0	108.569	0	0		0	158.185	0	0		0	93.216	0	0		0	189.257	0	0		0	98.8655	0	0
0			0		0			0		0			0		0			0		0			0		0			0		0			0		0			0		0			0		0			0
0	82.8784	0	0		0	37.2107	0	0		0	167.861	0	0		0	71.4965	0	0		0	152.319	0	0		0	108.799	0	0		0	158.519	0	0		0	93.4131	0	0		0	189.657	0	0		0	99.0745	0	0
0			0		0			0		0			0		0			0		0			0		0			0		0			0		0			0		0			0		0			0
0	83.0533	0	0		0	37.2892	0	0		0	168.215	0	0		0	71.6473	0	0		0	152.64	0	0		0	109.028	0	0		0	158.854	0	0		0	93.6102	0	0		0	190.057	0	0		0	99.2836	0	0
0			0		0			0		0			0		0			0		0			0		0			0		0			0		0			0		0			0		0			0
0	83.2281	0	0		0	37.3677	0	0		0	168.57	0	0		0	71.7981	0	0		0	152.961	0	0		0	109.258	0	0		0	159.188	0	0		0	93.8073	0	0		0	190.457	0	0		0	99.4926	0	0
0			0		0			0		0			0		0			0		0			0		0			0		0			0		0			0		0			0		0			0
0	83.403	0	0		0	37.4462	0	0		0	168.924	0	0		0	71.949	0	0		0	153.283	0	0		0	109.488	0	0		0	159.523	0	0		0	94.0044	0	0		0	190.857	0	0		0	99.7016	0	0
0			0		0			0		0			0		0			0		0			0		0			0		0			0		0			0		0			0		0			0
0	83.5778	0	0		0	37.5247	0	0		0	169.278	0	0		0	72.0998	0	0		0	153.604	0	0		0	109.717	0	0		0	159.857	0	0		0	94.2014	0	0		0	191.257	0	0		0	99.9106	0	0
0			0		0			0		0			0		0			0		0			0		0			0		0			0		0			0		0			0		0			0
0	83.7527	0	0		0	37.6033	0	0		0	169.632	0	0		0	72.2506	0	0		0	153.925	0	0		0	109.947	0	0		0	160.191	0	0		0	94.3985	0	0		0	191.657	0	0		0	100.12	0	0
0			0		0			0		0			0		0			0		0			0		0			0		0			0		0			0		0			0		0			0
0	83.9275	0	0		0	37.6818	0	0		0	169.986	0	0		0	72.4015	0	0		0.912702	154.247	0.591716	19.1647		0	110.176	0	0		0	160.526	0	0		0	94.5956	0	0		1.37184	192.058	0.714286	41.3223		0	100.329	0	0
0			0		0			0		0			0		0			0		0			0		0			0		0			0		0			0		0			0		0			0
0	84.1024	0	0		0	37.7602	0	0		0	170.34	0	0		0	72.5523	0	0		0	154.568	0	0		0	110.406	0	0		0	160.86	0	0		0	94.7926	0	0		0	192.458	0	0		0	100.538	0	0
0			0		0			0		0			0		0			0		0			0		0			0		0			0		0			0		0			0		0			0
0	84.2772	0	0		0	37.8388	0	0		0	170.694	0	0		0	72.7032	0	0		0	154.889	0	0		0	110.635	0	0		0	161.195	0	0		0	94.9897	0	0		0	192.858	0	0		0.654199	100.747	0.649351	9.63148
0			0		0			0		0			0		0			0		0			0		0			0		0			0		0			0		0			0		0			0
0	84.4521	0	0		0	37.9173	0	0		4.07258	171.048	2.38095	138.979		0	72.854	0	0		0	155.211	0	0		0	110.865	0	0		0	161.529	0	0		0	95.1868	0	0		0	193.258	0	0		0	100.956	0	0
0			0		0			0		0			0		0			0		0			0		0			0		0			0		0			0		0			0		0			0
0	84.6269	0	0		0	37.9958	0	0		0	171.403	0	0		0	73.0048	0	0		0	155.532	0	0		0	111.094	0	0		0	161.863	0	0		0	95.3839	0	0		0	193.658	0	0		0	101.165	0	0
0			0		0			0		0			0		0			0		0			0		0			0		0			0		0			0		0			0		0			0
0	84.8018	0	0		0	38.0743	0	0		0	171.757	0	0		0	73.1557	0	0		0	155.853	0	0		0	111.324	0	0		0	162.198	0	0		0	95.581	0	0		0	194.058	0	0		0	101.374	0	0
0			0		0			0		0			0		0			0		0			0		0			0		0			0		0			0		0			0		0			0
0	84.9766	0	0		0	38.1528	0	0		0	172.111	0	0		0	73.3065	0	0		0	156.175	0	0		0	111.553	0	0		0	162.532	0	0		0	95.778	0	0		0	194.458	0	0		0	101.583	0	0
0			0		0			0		0			0		0			0		0			0		0			0		0			0		0			0		0			0		0			0
0	85.1515	0	0		0	38.2313	0	0		0	172.465	0	0		0	73.4573	0	0		0	156.496	0	0		0	111.783	0	0		0	162.867	0	0		0	95.9751	0	0		0	194.858	0	0		0	101.792	0	0
0			0		0			0		0			0		0			0		0			0		0			0		0			0		0			0		0			0		0			0
0	85.3263	0	0		1.27699	38.3098	3.33333	8.66775		0	172.819	0	0		0	73.6082	0	0		0	156.817	0	0		0	112.012	0	0		0	163.201	0	0		0	96.1722	0	0		1.3947	195.259	0.714286	44.8735		0	102.001	0	0
0			0		0			0		0			0		0			0		0			0		0			0		0			0		0			0		0			0		0			0
0	85.5012	0	0		0	38.3883	0	0		0	173.173	0	0		0	73.759	0	0		0	157.139	0	0		0	112.242	0	0		0	163.536	0	0		0	96.3692	0	0		0	195.659	0	0		0	102.21	0	0
0			0		0			0		0			0		0			0		0			0		0			0		0			0		0			0		0			0		0			0
2.0399	85.676	2.38095	13.9437		0	38.4668	0	0		0	173.528	0	0		0	73.9099	0	0		0.931717	157.46	0.591716	21.3901		0	112.472	0	0		0	163.87	0	0		0	96.5663	0	0		0	196.059	0	0		0	102.419	0	0
0			0		0			0		0			0		0			0		0			0		0			0		0			0		0			0		0			0		0			0
0	85.8509	0	0		0	38.5453	0	0		0	173.882	0	0		0	74.0607	0	0		0	157.781	0	0		0	112.701	0	0		0	164.204	0	0		0	96.7634	0	0		0	196.459	0	0		0	102.628	0	0
0			0		0			0		0			0		0			0		0			0		0			0		0			0		0			0		0			0		0			0
0	86.0257	0	0		0	38.6238	0	0		0	174.236	0	0		0	74.2115	0	0		0	158.103	0	0		0	112.931	0	0		0	164.539	0	0		0	96.9605	0	0		0	196.859	0	0		0	102.837	0	0
0			0		0			0		0			0		0			0		0			0		0			0		0			0		0			0		0			0		0			0
0	86.2006	0	0		0	38.7023	0	0		0	174.59	0	0		0	74.3624	0	0		0	158.424	0	0		0	113.16	0	0		0	164.873	0	0		0	97.1575	0	0		0	197.259	0	0		0	103.046	0	0
0			0		0			0		0			0		0			0		0			0		0			0		0			0		0			0		0			0		0			0
0	86.3754	0	0		0	38.7808	0	0		0	174.944	0	0		0	74.5132	0	0		0	158.745	0	0		0	113.39	0	0		0	165.208	0	0		0	97.3546	0	0		0	197.659	0	0		0	103.255	0	0
0			0		0			0		0			0		0			0		0			0		0			0		0			0		0			0		0			0		0			0
0	86.5503	0	0		0	38.8593	0	0		0	175.298	0	0		0	74.664	0	0		0	159.067	0	0		0	113.619	0	0		0	165.542	0	0		0	97.5517	0	0		0	198.06	0	0		0	103.464	0	0
0			0		0			0		0			0		0			0		0			0		0			0		0			0		0			0		0			0		0			0
0	86.7251	0	0		0	38.9378	0	0		0	175.652	0	0		0	74.8149	0	0		0	159.388	0	0		0.677671	113.849	0.595238	13.0731		0	165.877	0	0		0	97.7488	0	0		0	198.46	0	0		0	103.673	0	0
0			0		0			0		0			0		0			0		0			0		0			0		0			0		0			0		0			0		0			0
0	86.9	0	0		0	39.0163	0	0		0	176.006	0	0		0	74.9657	0	0		0	159.709	0	0		0	114.078	0	0		0	166.211	0	0		0	97.9458	0	0		0	198.86	0	0		0	103.882	0	0
0			0		0			0		0			0		0			0		0			0		0			0		0			0		0			0		0			0		0			0
0	87.0748	0	0		0	39.0948	0	0		0	176.361	0	0		0	75.1166	0	0		0	160.031	0	0		0	114.308	0	0		0	166.546	0	0		0	98.1429	0	0		0	199.26	0	0		0	104.091	0	0
0			0		0			0		0			0		0			0		0			0		0			0		0			0		0			0		0			0		0			0
0	87.2497	0	0		0	39.1733	0	0		0	176.715	0	0		0	75.2674	0	0		0	160.352	0	0		0	114.537	0	0		0	166.88	0	0		0	98.34	0	0		0	199.66	0	0		0	104.3	0	0
0			0		0			0		0			0		0			0		0			0		0			0		0			0		0			0		0			0		0			0
0	87.4245	0	0		0	39.2518	0	0		0	177.069	0	0		0	75.4182	0	0		0	160.674	0	0		0	114.767	0	0		0	167.214	0	0		0	98.537	0	0		0	200.06	0	0		0	104.509	0	0
0			0		0			0		0			0		0			0		0			0		0			0		0			0		0			0		0			0		0			0
0	87.5994	0	0		0	39.3303	0	0		0	177.423	0	0		0	75.5691	0	0		2.8579	160.995	1.77515	71.9376		0	114.996	0	0		0	167.549	0	0		0	98.7341	0	0		0	200.46	0	0		0	104.718	0	0
0			0		0			0		0			0		0			0		0			0		0			0		0			0		0			0		0			0		0			0
0	87.7742	0	0		0	39.4088	0	0		4.23279	177.777	2.38095	164.536		0	75.7199	0	0		0	161.316	0	0		0	115.226	0	0		0	167.883	0	0		0	98.9312	0	0		0	200.86	0	0		0	104.927	0	0
0			0		0			0		0			0		0			0		0			0		0			0		0			0		0			0		0			0		0			0
0	87.949	0	0		0	39.4873	0	0		0	178.131	0	0		0	75.8707	0	0		0	161.638	0	0		0	115.456	0	0		0	168.218	0	0		0	99.1283	0	0		0	201.26	0	0		0	105.136	0	0
0			0		0			0		0			0		0			0		0			0		0			0		0			0		0			0		0			0		0			0
0	88.1239	0	0		0	39.5658	0	0		0	178.485	0	0		0	76.0216	0	0		0	161.959	0	0		0	115.685	0	0		0	168.552	0	0		0	99.3253	0	0		0	201.661	0	0		0	105.345	0	0
0			0		0			0		0			0		0			0		0			0		0			0		0			0		0			0		0			0		0			0
0	88.2988	0	0		0	39.6443	0	0		0	178.839	0	0		0	76.1724	0	0		0	162.28	0	0		0	115.915	0	0		0	168.887	0	0		0	99.5224	0	0		0	202.061	0	0		0	105.554	0	0
0			0		0			0		0			0		0			0		0			0		0			0		0			0		0			0		0			0		0			0
0	88.4736	0	0		0	39.7228	0	0		0	179.194	0	0		0	76.3232	0	0		0	162.602	0	0		0	116.144	0	0		0	169.221	0	0		0	99.7195	0	0		0	202.461	0	0		0	105.763	0	0
0			0		0			0		0			0		0			0		0			0		0			0		0			0		0			0		0			0		0			0
0	88.6485	0	0		0	39.8013	0	0		0	179.548	0	0		0	76.4741	0	0		0	162.923	0	0		0	116.374	0	0		0	169.555	0	0		0	99.9166	0	0		0	202.861	0	0		0	105.972	0	0
0			0		0			0		0			0		0			0		0			0		0			0		0			0		0			0		0			0		0			0
0	88.8233	0	0		0	39.8798	0	0		0	179.902	0	0		0	76.6249	0	0		0	163.244	0	0		0	116.603	0	0		0	169.89	0	0		0	100.114	0	0		0	203.261	0	0		0	106.181	0	0
0			0		0			0		0			0		0			0		0			0		0			0		0			0		0			0		0			0		0			0
0	88.9981	0	0		0	39.9584	0	0		0	180.256	0	0		0	76.7758	0	0		0	163.566	0	0		0	116.833	0	0		0	170.224	0	0		0	100.311	0	0		0	203.661	0	0		0	106.39	0	0
0			0		0			0		0			0		0			0		0			0		0			0		0			0		0			0		0			0		0			0
0	89.173	0	0		0	40.0369	0	0		0	180.61	0	0		0	76.9266	0	0		0	163.887	0	0		0	117.062	0	0		0	170.559	0	0		0	100.508	0	0		0	204.061	0	0		0	106.599	0	0
0			0		0			0		0			0		0			0		0			0		0			0		0			0		0			0		0			0		0			0
2.12733	89.3478	2.38095	18.4961		0.445726	40.1154	1.11111	3.57249		4.30868	180.964	2.38095	177.395		0.393252	77.0774	0.510204	8.31383		0.971647	164.208	0.591716	26.4612		0.698165	117.292	0.595238	15.0645		1.18676	170.893	0.694445	51.2023		0.265013	100.705	0.263158	6.84633		1.46044	204.461	0.714286	55.8988		0.34678	106.808	0.324675	6.45091
[truncated: 24 more columns]
